# Supplementary material for: Panelist Acceptance, Proximate Characteristics of Amino Acids and Volatile Compounds, and Color Profile of Fermented Cempedak (Artocarpus champeden) and Oyster Mushroom (Pleurotus ostreatus) Seasoning
Source: Hindawi journal article supplement (doi:10.1155/2022/3092246), 2022-07-07

Analyzed by :Laboratorium Biosain  
Sample Type : Jamur mix bumbu  
Level # : 1  
Sample Name : Jamur mix bumbu  
Sample ID : Jamur mix bumbu  
IS Amount : [1]=1.000  
Sample Amount : 1.000  
Dilution Factor : 1.000  
Vial # : 1  
Injection Volume : 1.000  
Data File : C:\GCMSsolution\Data\Project1\analisa volatil\Jamur mix bumbu.qgd  
Org Data File : C:\GCMSsolution\Data\Project1\analisa volatil\Jamur mix bumbu.qgd  
Tuning File : C:\GCMSsolution\System\Tune1\novita 05042021.qgt  
Modified by : Admin

# Method

[Comment]

===== Analytical Line 1 =====

[GC-2010]

Column Oven Temp. :60.0 °C  
Injection Temp. :260.00 °C  
Injection Mode :Splitless  
Sampling Time :1.00 min  
Flow Control Mode :Pressure  
Pressure :38.9 kPa  
Total Flow :37.5 mL/min  
Column Flow :0.78 mL/min  
Linear Velocity :32.2 cm/sec  
Purge Flow :3.0 mL/min  
Split Ratio :-1.0  
High Pressure Injection :OFF  
Carrier Gas Saver :OFF  
Oven Temp. Program  
Rate Temperature(°C) Hold Time(min)  
- 60.0 3.00  
5.00 220.0 20.00

< Ready Check Heat Unit >

Column Oven : Yes  
SPL1 : Yes  
MS : Yes

< Ready Check Detector(FTD) >

< Ready Check Baseline Drift >

< Ready Check Injection Flow >

SPL1 Carrier : Yes  
SPL1 Purge : Yes

< Ready Check APC Flow >

< Ready Check Detector APC Flow >

External Wait :No  
Equilibrium Time :3.0 min

[GC Program]

[GCMS-QP2010 Plus]

IonSourceTemp :200.00 °C  
Interface Temp. :200.00 °C  
Solvent Cut Time :1.00 min  
Detector Gain Mode :Relative  
Detector Gain :0.00 kV  
Threshold :1000

[MS Table]

--Group 1 - Event 1--

Start Time :1.00min  
End Time :55.00min  
ACQ Mode :Scan  
Event Time :0.60sec  
Scan Speed : 555  
Start m/z :30.00  
End m/z :350.00

Sample Inlet Unit :GC

[MS Program]

Use MS Program :OFF

## Chromatogram Jamur mix bumbu

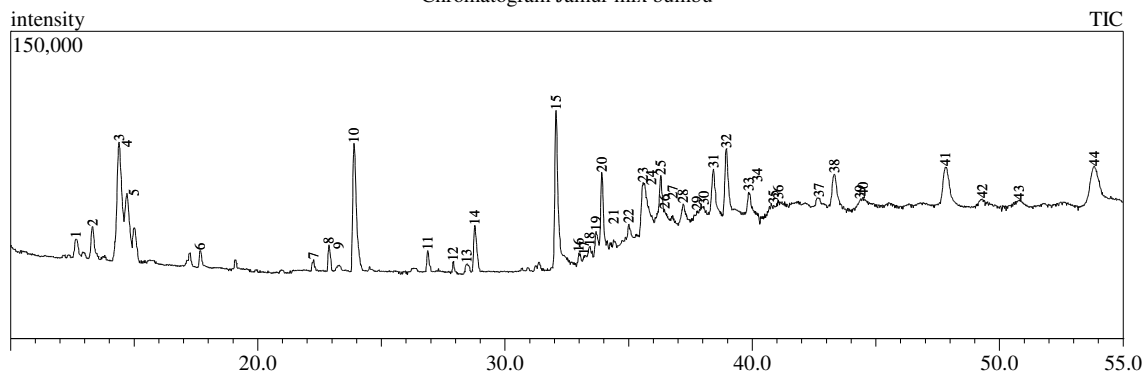

| Peak Report TIC |        |         |        |        |         |                                                   |
|-----------------|--------|---------|--------|--------|---------|---------------------------------------------------|
| Peak#           | R.Time | Area    | Area%  | Height | Height% | Name                                              |
| 1               | 12.643 | 95447   | 1.26   | 9052   | 1.33    | Ethanol, 2-(2-ethoxyethoxy)- (CAS) 2-(2-Ethc      |
| 2               | 13.316 | 136754  | 1.80   | 15274  | 2.24    | 1-Octanol (CAS) Octilin                           |
| 3               | 14.386 | 819427  | 10.78  | 58253  | 8.55    | 1-ALLYL-CYCLOPROPANECARBOXYLI                     |
| 4               | 14.711 | 438056  | 5.76   | 33542  | 4.92    | 2,6-DIHYDRO-2H-PYRAN-2-ONE                        |
| 5               | 14.990 | 174343  | 2.29   | 16861  | 2.47    | 2,5-Furandione (CAS) Maleic anhydride             |
| 6               | 17.673 | 52616   | 0.69   | 7982   | 1.17    | 3-oxo-.alpha.-ionone                              |
| 7               | 22.258 | 36902   | 0.49   | 5608   | 0.82    | [3R-(3.alpha.,3a.alpha.,5aS,7a.alpha.,11a.beta.   |
| 8               | 22.880 | 87083   | 1.15   | 12952  | 1.90    | Bis-[3-oxo-6'-diethylamino-spiro(phthalan-1,9     |
| 9               | 23.277 | 32500   | 0.43   | 2798   | 0.41    | acetyl decyl ether                                |
| 10              | 23.895 | 647474  | 8.51   | 62524  | 9.17    | 1-Dodecanol (CAS) n-Dodecanol                     |
| 11              | 26.873 | 67177   | 0.88   | 10325  | 1.52    | 1-Tetradecanol (CAS) Alfol 14                     |
| 12              | 27.901 | 32940   | 0.43   | 5934   | 0.87    | 2-Nonen-1-ol                                      |
| 13              | 28.452 | 48600   | 0.64   | 4574   | 0.67    | 6.BETA.-ACETOXY-3.ALPHA.-ANGELOY                  |
| 14              | 28.780 | 204073  | 2.68   | 23078  | 3.39    | 1-Heptadecene (CAS) Hexahydroaplotaxene           |
| 15              | 32.061 | 634063  | 8.34   | 75018  | 11.01   | Ethanol, 2-(dodecyloxy)- (CAS) DODECOXY           |
| 16              | 32.989 | 46588   | 0.61   | 6213   | 0.91    | Butane, 2,2-dimethyl- (CAS) 2,2-Dimethylbut       |
| 17              | 33.190 | 33075   | 0.43   | 3632   | 0.53    | Methyl 2-azidobenzoate                            |
| 18              | 33.420 | 63239   | 0.83   | 6838   | 1.00    | 1-(3-(morpholin-4-yl)propyl)cyclopentanol         |
| 19              | 33.680 | 108010  | 1.42   | 12839  | 1.88    | N,N-DIMETHYL-HEPTADECYLAMINE                      |
| 20              | 33.914 | 333516  | 4.39   | 40499  | 5.94    | Nonanoic acid, 7-methyl-, methyl ester (CAS)      |
| 21              | 34.396 | 32943   | 0.43   | 4918   | 0.72    | (+)-dehydrocamphor                                |
| 22              | 35.011 | 84951   | 1.12   | 9285   | 1.36    | Dodecane, 1,1'-oxybis- (CAS) DIDODECANI           |
| 23              | 35.591 | 468146  | 6.16   | 26506  | 3.89    | Hexadecanoic acid (CAS) Palmitic acid             |
| 24              | 35.920 | 52408   | 0.69   | 8396   | 1.23    | 3-METHYLDIOXOPIPERAZINE                           |
| 25              | 36.302 | 275803  | 3.63   | 26064  | 3.82    | 2,3,6,7-tetramethyl-10-(4-methylphenylsulfon      |
| 26              | 36.450 | 73955   | 0.97   | 8765   | 1.29    | Pulegone                                          |
| 27              | 36.784 | 31577   | 0.42   | 4024   | 0.59    | 1,6-Dioxaspiro[4.4]non-3-ene                      |
| 28              | 37.205 | 117709  | 1.55   | 9952   | 1.46    | Docosane (CAS) n-Docosane                         |
| 29              | 37.760 | 30795   | 0.40   | 5139   | 0.75    | 2-ETHYL-5-METHYLFURAN                             |
| 30              | 38.042 | 89580   | 1.18   | 6862   | 1.01    | Pentanal, 2,3-dimethyl- (CAS) 2,3-Dimethylpx      |
| 31              | 38.428 | 276824  | 3.64   | 24012  | 3.52    | 10-Undecenoic acid, methyl ester (CAS) Meth       |
| 32              | 38.954 | 299577  | 3.94   | 31707  | 4.65    | 9-Octadecyne (CAS)                                |
| 33              | 39.857 | 162092  | 2.13   | 12275  | 1.80    | DIETHYL(DECYLOXY)-BORANE                          |
| 34              | 40.210 | 33151   | 0.44   | 4468   | 0.66    | Methyl 3-[(Tetrahydropyranyl)oxy]but-2-enol       |
| 35              | 40.870 | 33096   | 0.44   | 4554   | 0.67    | 1,3-Dioxolane, 2-(1,1-dimethylethyl)- (CAS) 2     |
| 36              | 41.050 | 72768   | 0.96   | 6069   | 0.89    | 1-METHYL-CIS-2-(N,N-DIMETHYLAMINO                 |
| 37              | 42.691 | 37089   | 0.49   | 3492   | 0.51    | 5-Iminopyrrolidine-2-carbonitrile                 |
| 38              | 43.320 | 227802  | 3.00   | 16835  | 2.47    | 3',4'-dihydro-2'-(morpholin-4-yl)-5',7'-dinitrosq |
| 39              | 44.370 | 47271   | 0.62   | 4231   | 0.62    | Octanal, 7-methoxy-3,7-dimethyl- (CAS) Metl       |
| 40              | 44.476 | 46122   | 0.61   | 4884   | 0.72    | 1,3-Dioxolane, 2-pentadecyl- (CAS) 2-PENT/        |
| 41              | 47.813 | 355145  | 4.67   | 19266  | 2.83    | Heptadecane, 2,6,10,15-tetramethyl- (CAS) 2,      |
| 42              | 49.307 | 49061   | 0.65   | 3784   | 0.56    | 1,3-Dioxolane, 2-pentadecyl- (CAS) 2-PENT/        |
| 43              | 50.783 | 30755   | 0.40   | 2162   | 0.32    | 3-Dodecanol, 3,7,11-trimethyl- (CAS) Hexahy       |
| 44              | 53.837 | 584003  | 7.68   | 20031  | 2.94    | 3',4'-dihydro-2'-(morpholin-4-yl)-5',7'-dinitrosq |
|                 |        | 7604506 | 100.00 | 681477 | 100.00  |                                                   |

Library

<< Target >>

Line#1 R.Time:12.640(Scan#:1165) MassPeaks:9

RawMode:Averaged 12.630-12.650(1164-1166) BasePeak:45.05(2682)

BG Mode:Calc. from Peak Group 1 - Event 1

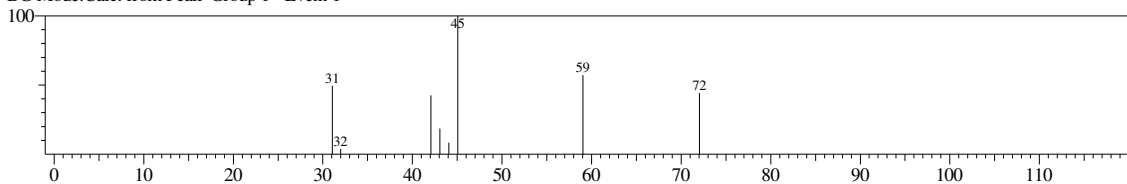

Hit#1 Entry:24142 Library:WILEY7.LIB

SI:86 Formula:C6 H14 O3 CAS:111-90-0 MolWeight:134 RetIndex:0

CompName:Ethanol, 2-(2-ethoxyethoxy)- (CAS) 2-(2-Ethoxyethoxy)ethanol \$\$ APV \$\$ Diethylene glycol monoethyl ether \$\$ Carbitol \$\$ Dioxitol \$\$ Solv

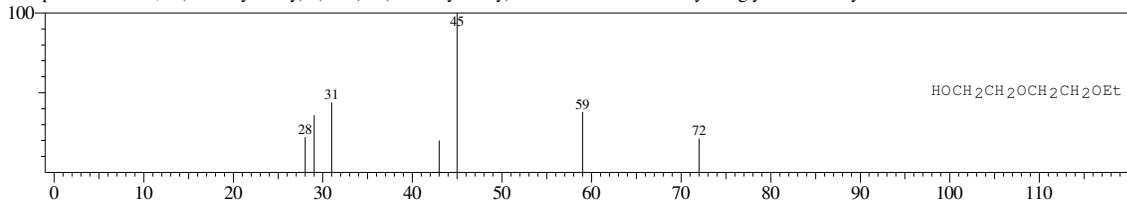

Hit#2 Entry:51451 Library:WILEY7.LIB

SI:84 Formula:C8 H18 O3 CAS:112-36-7 MolWeight:162 RetIndex:0

CompName:Ethane, 1,1'-oxybis[2-ethoxy- (CAS) Bis(2-ethoxyethyl) ether \$\$ Diethyl carbitol \$\$ 3,6,9-Trioxaundecane \$\$ Diethyldiethylene glycol \$\$ Ethe

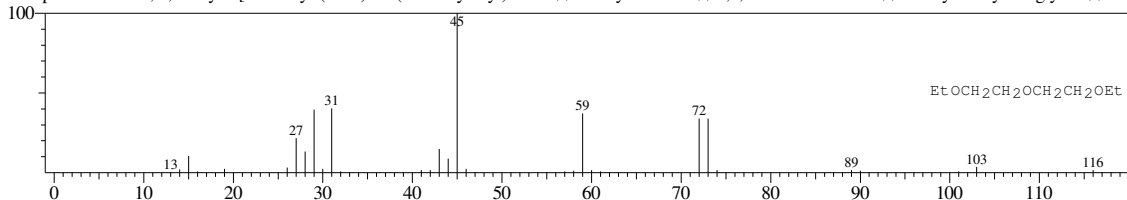

Hit#3 Entry:4455 Library:WILEY7.LIB

SI:82 Formula:C4 H10 O2 CAS:110-80-5 MolWeight:90 RetIndex:0

CompName:Ethanol, 2-ethoxy- (CAS) 2-Ethoxyethanol \$\$ Oxitol \$\$ Emkanol \$\$ Cellosolve \$\$ Poly-Solv EE \$\$ Plastiazan 60 \$\$ Ethyl cellosolve \$\$ .beta

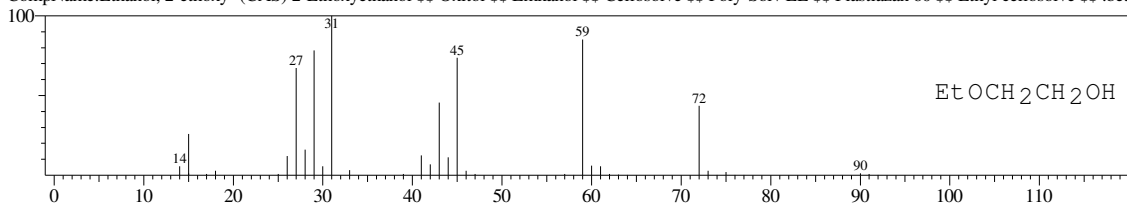

Hit#4 Entry:4460 Library:WILEY7.LIB

SI:82 Formula:C4 H10 O2 CAS:110-80-5 MolWeight:90 RetIndex:0

CompName:Ethanol, 2-ethoxy- (CAS) 2-Ethoxyethanol \$\$ Oxitol \$\$ Emkanol \$\$ Cellosolve \$\$ Poly-Solv EE \$\$ Plastiazan 60 \$\$ Ethyl cellosolve \$\$ .beta

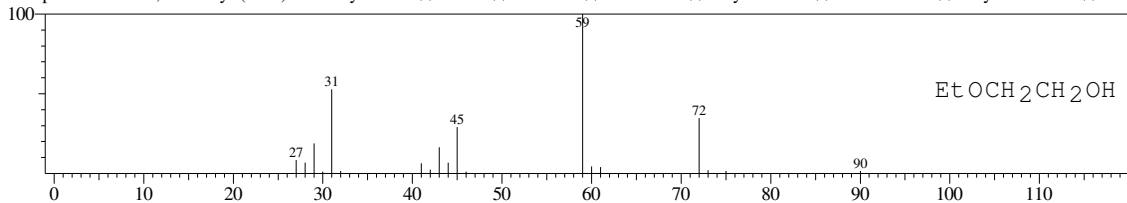

Hit#5 Entry:13339 Library:WILEY7.LIB

SI:82 Formula:C6 H12 O2 CAS:0-00-0 MolWeight:116 RetIndex:0

CompName:Vinyl 2-(ethoxyethyl) ether \$\$ Vinyl ethyl cellosolve \$\$

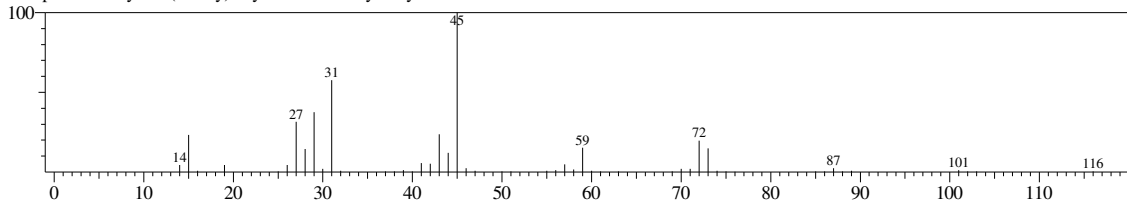

<< Target >>

Line#:2 R.Time:13.320(Scan#:1233) MassPeaks:13

RawMode:Averaged 13.310-13.330(1232-1234) BasePeak:55.05(2347)

BG Mode:Calc. from Peak Group 1 - Event 1

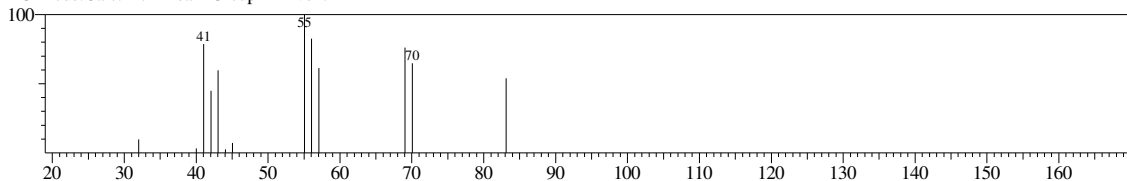

Hit#:1 Entry:21987 Library:WILEY7.LIB

SI:91 Formula:C<sub>8</sub>H<sub>18</sub>O CAS:111-87-5 MolWeight:130 RetIndex:0

CompName:1-Octanol (CAS) Octilin \$\$ Alfol 8 \$\$ Sipol L8 \$\$ n-Octanol \$\$ n-Octan-1-ol \$\$ Octyl alcohol \$\$ Octanol \$\$ n-Octyl alcohol \$\$ Heptyl carbir

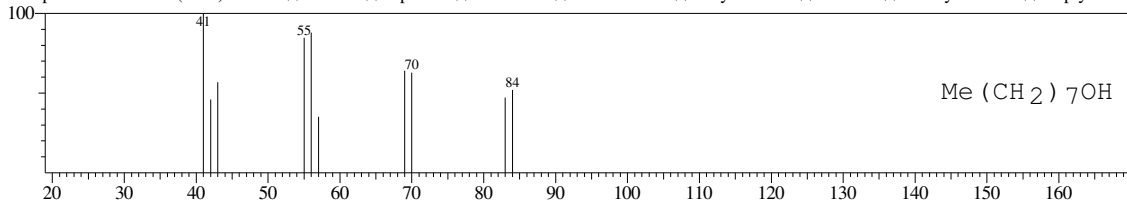

Hit#:2 Entry:79272 Library:WILEY7.LIB

SI:90 Formula:C<sub>12</sub>H<sub>26</sub>O CAS:112-53-8 MolWeight:186 RetIndex:0

CompName:1-Dodecanol (CAS) n-Dodecanol \$\$ CO 12 \$\$ S 1298 \$\$ Dodecanol \$\$ Pisol \$\$ Alfol 12 \$\$ Sipol L 12 \$\$ Lauryl 24 \$\$ Siponol 25 \$\$ Siponol

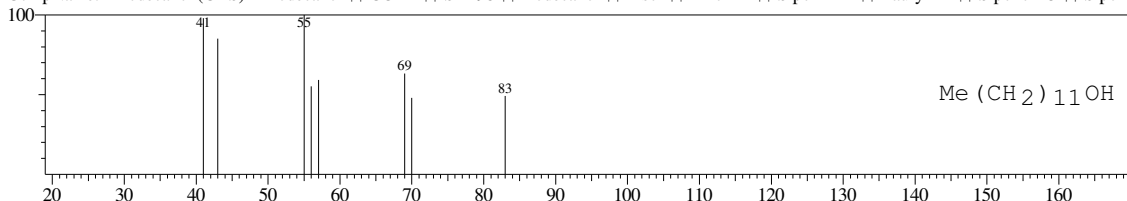

Hit#:3 Entry:131524 Library:WILEY7.LIB

SI:90 Formula:C<sub>15</sub>H<sub>32</sub>O CAS:629-76-5 MolWeight:228 RetIndex:0

CompName:1-Pentadecanol (CAS) Pentadecanol \$\$ n-Pentadecanol \$\$ n-1-Pentadecanol \$\$ Pentadecyl alcohol \$\$ Pentadecanol-(1) \$\$

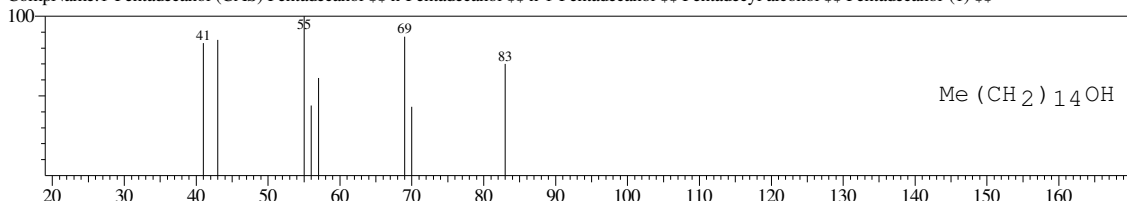

Hit#:4 Entry:267812 Library:WILEY7.LIB

SI:90 Formula:C<sub>24</sub>H<sub>50</sub>O<sub>2</sub> CAS:0-00-0 MolWeight:370 RetIndex:0

CompName:1,1-Dioctyloxyoctane \$\$

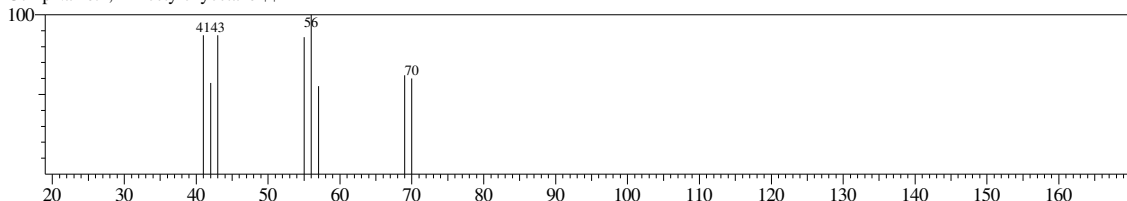

Hit#:5 Entry:58352 Library:WILEY7.LIB

SI:90 Formula:C<sub>12</sub>H<sub>24</sub> CAS:81983-69-9 MolWeight:168 RetIndex:0

CompName:2-Propyl-1,3,3-trimethylcyclohexane \$\$ Cyclohexane, 1,1,3-trimethyl-2-propyl-, cis- (CAS)

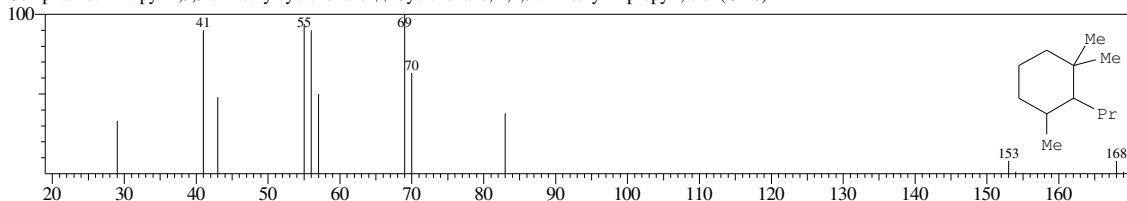

<< Target >>

Line#:3 R.Time:14.390(Scan#:1340) MassPeaks:23

RawMode:Averaged 14.380-14.400(1339-1341) BasePeak:108.05(7069)

BG Mode:Calc. from Peak Group 1 - Event 1

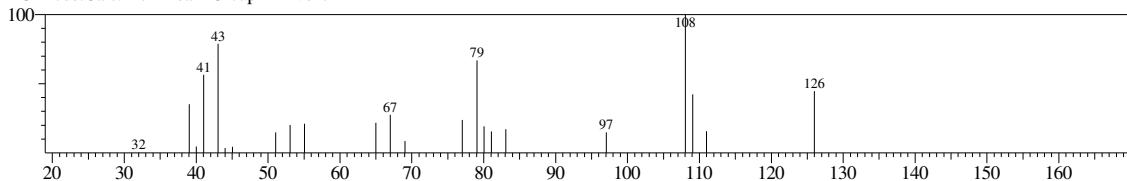

Hit#:1 Entry:18233 Library:WILEY7.LIB

SI:75 Formula:C7 H10 O2 CAS:0-00-0 MolWeight:126 RetIndex:0

CompName:1-ALLYL-CYCLOPROPANECARBOXYLIC ACID \$\$

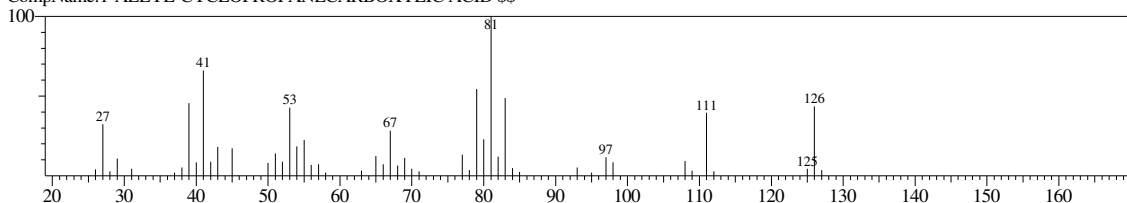

Hit#:2 Entry:57509 Library:WILEY7.LIB

SI:74 Formula:C10 H16 O2 CAS:0-00-0 MolWeight:168 RetIndex:0

CompName:4-PENTENOIC ACID, 4-METHYL-3-METHYLENE-, ISOPROPYLESTER \$\$

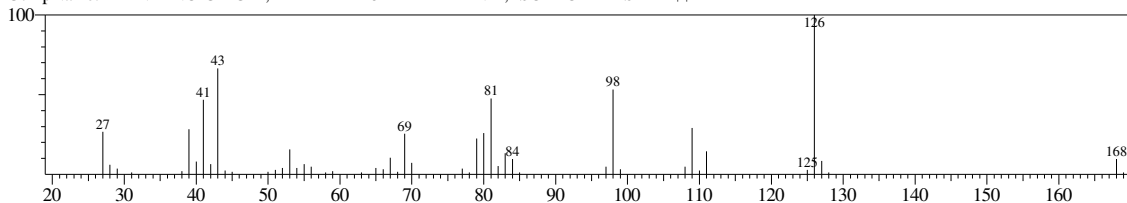

Hit#:3 Entry:95834 Library:WILEY7.LIB

SI:73 Formula:C10 H16 O4 CAS:124899-04-3 MolWeight:200 RetIndex:0

CompName:(4aS,8aS,1'S)-perhydro-4a-(1'-hydroxyethyl)-2H,4H-[1,3]benzodioxin-4-one \$\$ 4A-(1-HYDROXY-ETHYL)-HEXAHYDRO-BENZO[1,3]DI

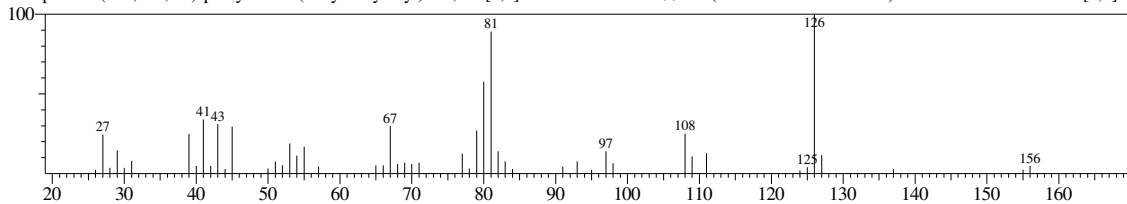

Hit#:4 Entry:18402 Library:WILEY7.LIB

SI:73 Formula:C8 H14 O CAS:110-93-0 MolWeight:126 RetIndex:0

CompName:6-METHYL-5-HEPTEN-2-ONE \$\$

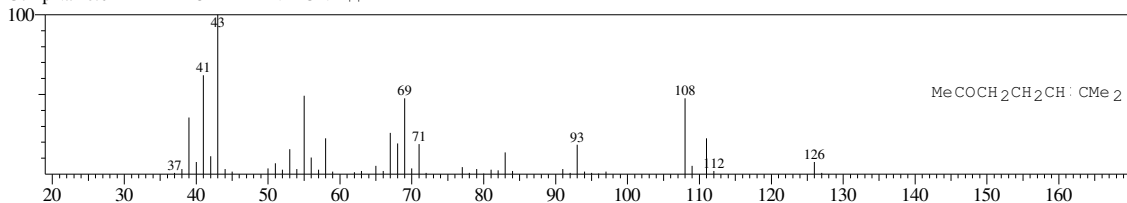

Hit#:5 Entry:57508 Library:WILEY7.LIB

SI:73 Formula:C10 H16 O2 CAS:0-00-0 MolWeight:168 RetIndex:0

CompName:2,4-PENTADIENOIC ACID, 3,4-DIMETHYL-, ISOPROPYLESTER \$\$

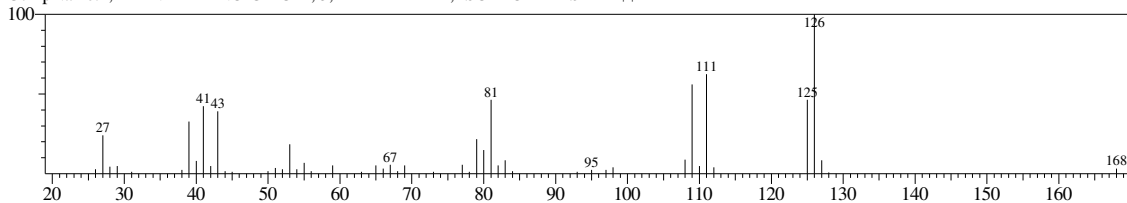

<< Target >>

Line#:4 R.Time:14.710(Scan#:1372) MassPeaks:12

RawMode:Averaged 14.700-14.720(1371-1373) BasePeak:68.00(8244)

BG Mode:Calc. from Peak Group 1 - Event 1

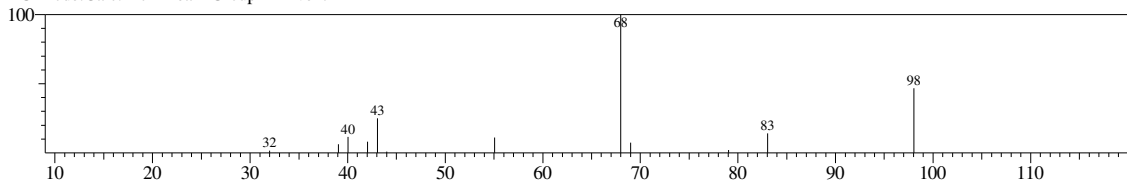

Hit#:1 Entry:5600 Library:WILEY7.LIB

SI:77 Formula:C5 H6 O2 CAS:0-00-0 MolWeight:98 RetIndex:0

CompName:2,6-DIHYDRO-2H-PYRAN-2-ONE \$\$

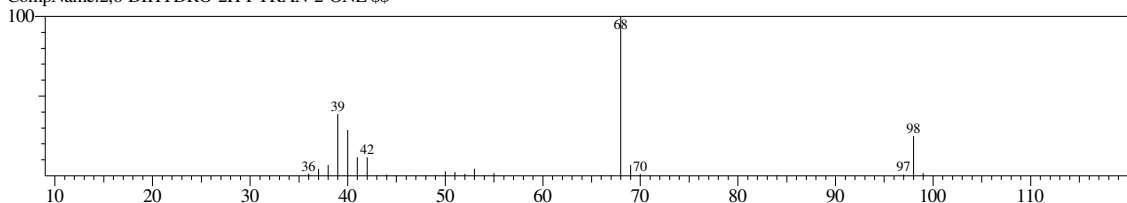

Hit#:2 Entry:5880 Library:WILEY7.LIB

SI:75 Formula:C5 H6 O2 CAS:3393-45-1 MolWeight:98 RetIndex:0

CompName:5,6-Dihydro-2H-pyran-2-one \$\$ 2H-Pyran-2-one, 5,6-dihydro- (CAS) 2-Pentenoic acid, 5-hydroxy-, .delta.-lactone \$\$ 5,6-Dihydro-2-pyranone

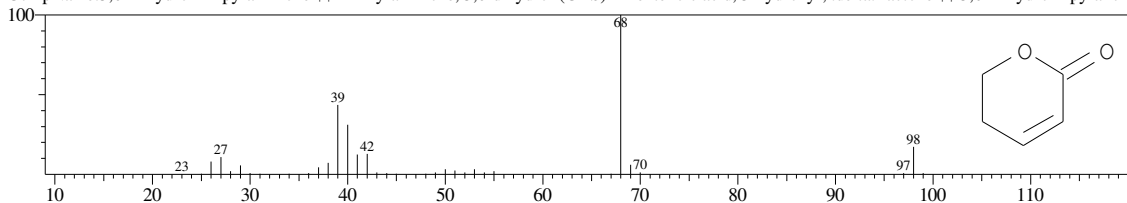

Hit#:3 Entry:5359 Library:WILEY7.LIB

SI:74 Formula:C6 H8 O CAS:930-68-7 MolWeight:96 RetIndex:0

CompName:2-Cyclohexen-1-one (CAS) 2-Cyclohexenone \$\$ Cyclohexen-2-one \$\$ 1-Cyclohexen-3-one \$\$ Cyclohex-2-en-1-one \$\$

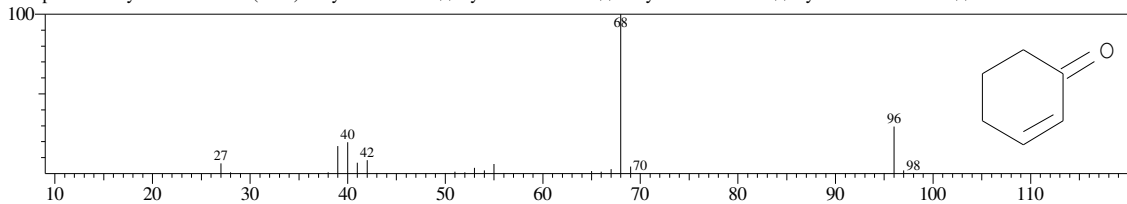

Hit#:4 Entry:5364 Library:WILEY7.LIB

SI:73 Formula:C6 H8 O CAS:930-68-7 MolWeight:96 RetIndex:0

CompName:2-Cyclohexen-1-one (CAS) 2-Cyclohexenone \$\$ Cyclohexen-2-one \$\$ 1-Cyclohexen-3-one \$\$ Cyclohex-2-en-1-one \$\$ 2-Cyclohexene-1-one

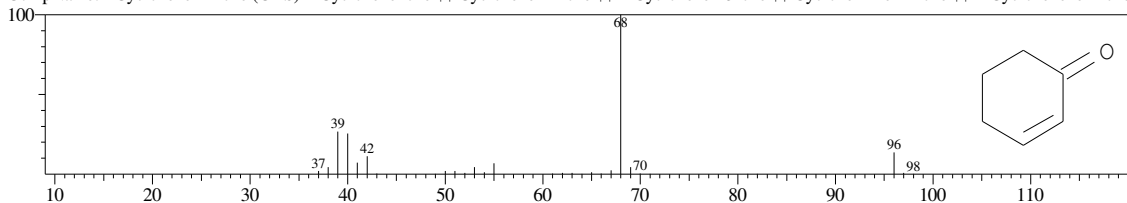

Hit#:5 Entry:11717 Library:WILEY7.LIB

SI:72 Formula:C5 H7 N O2 CAS:105-56-6 MolWeight:113 RetIndex:0

CompName:Acetic acid, cyano-, ethyl ester (CAS) Ethyl cyanoacetate \$\$ Ethyl cyanoacetate \$\$ Cyanoacetic ester \$\$ Ethyl cyanoethanoate \$\$ Cyanoacetic a

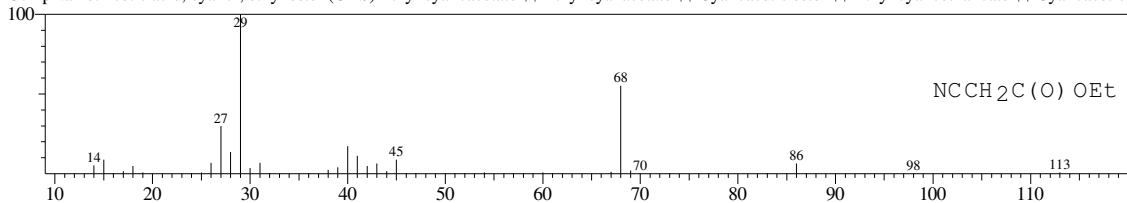

<< Target >>

Line#:5 R.Time:14.990(Scan#:1400) MassPeaks:7

RawMode:Averaged 14.980-15.000(1399-1401) BasePeak:54.05(4399)

BG Mode:Calc. from Peak Group 1 - Event 1

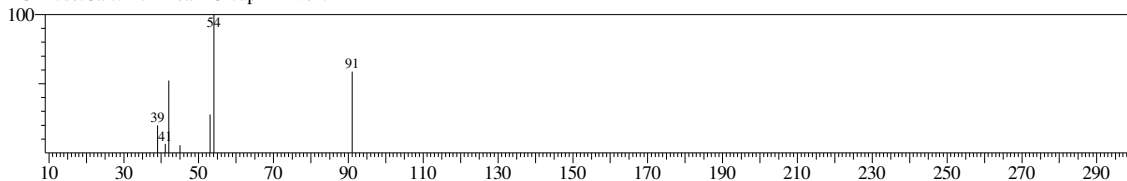

Hit#:1 Entry:5813 Library:WILEY7.LIB

SI:74 Formula:C4 H2 O3 CAS:108-31-6 MolWeight:98 RetIndex:0

CompName:2,5-Furandione (CAS) Maleic anhydride \$\$ BM 10 \$\$ Maleic acid anhydride \$\$ Toxic anhydride \$\$ Dihydro-2,5-dioxofuran \$\$ cis-Butenedi

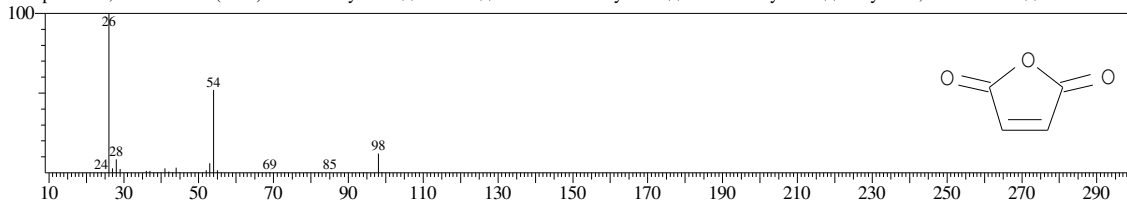

Hit#:2 Entry:205711 Library:WILEY7.LIB

SI:73 Formula:C14 H18 N2 O5 CAS:56272-47-0 MolWeight:294 RetIndex:0

CompName:L-Alanine, N-(N-acetyl-L-tyrosyl)- (CAS) ACETYL-TYROSYL-ALANINE \$\$

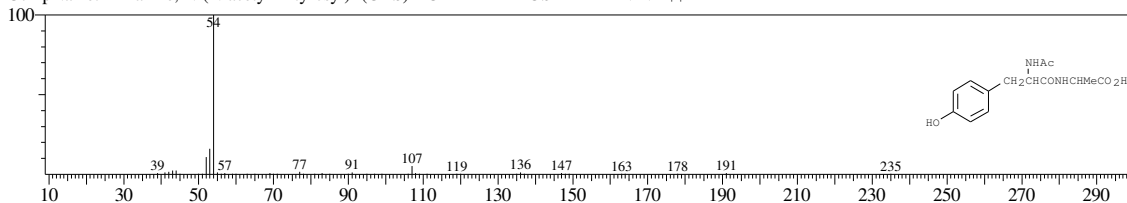

Hit#:3 Entry:5816 Library:WILEY7.LIB

SI:72 Formula:C4 H2 O3 CAS:108-31-6 MolWeight:98 RetIndex:0

CompName:2,5-Furandione (CAS) Maleic anhydride \$\$ BM 10 \$\$ Maleic acid anhydride \$\$ Toxic anhydride \$\$ Dihydro-2,5-dioxofuran \$\$ cis-Butenedi

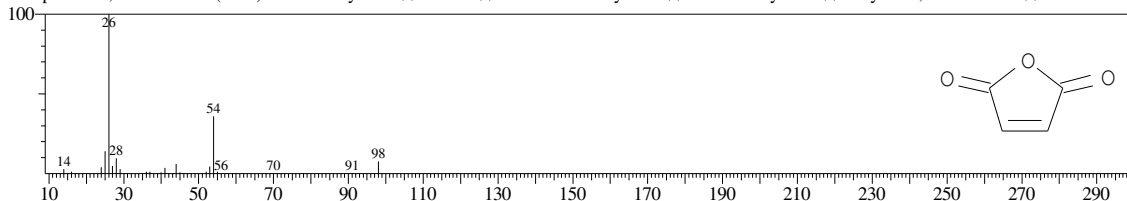

Hit#:4 Entry:107450 Library:WILEY7.LIB

SI:72 Formula:C11 H14 O2 S CAS:0-00-0 MolWeight:210 RetIndex:0

CompName:4-Butenyl-p-toluenesulfonate \$\$

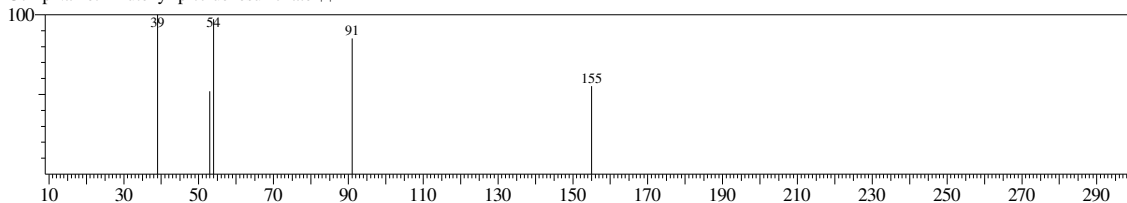

Hit#:5 Entry:205712 Library:WILEY7.LIB

SI:71 Formula:C14 H18 N2 O5 CAS:56272-47-0 MolWeight:294 RetIndex:0

CompName:L-Alanine, N-(N-acetyl-L-tyrosyl)- (CAS) ACETYL-TYROSYL-ALANINE \$\$

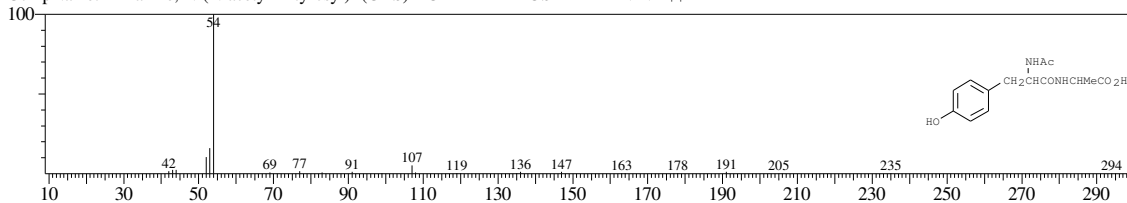

<< Target >>

Line#6 R.Time:17.670(Scan#:1668) MassPeaks:7

RawMode:Averaged 17.660-17.680(1667-1669) BasePeak:108.05(2809)

BG Mode:Calc. from Peak Group 1 - Event 1

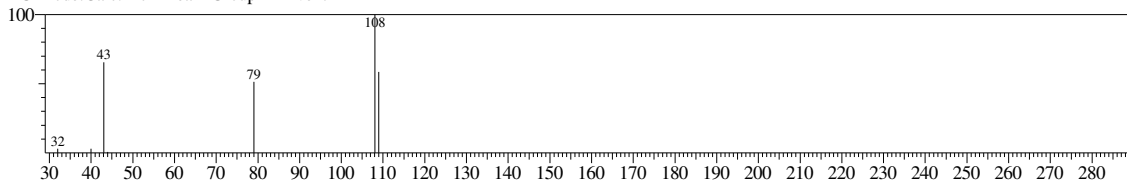

Hit#1 Entry:103614 Library:WILEY7.LIB

SI:81 Formula:C13 H18 O2 CAS:0-00-0 MolWeight:206 RetIndex:0

CompName:3-oxo-.alpha.-ionone \$\$

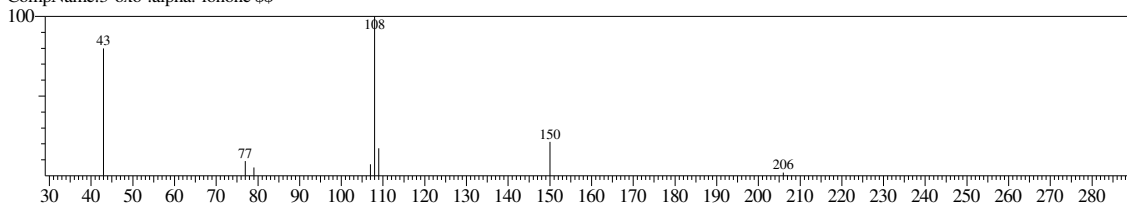

Hit#2 Entry:190020 Library:WILEY7.LIB

SI:76 Formula:C14 H16 O4 S CAS:0-00-0 MolWeight:280 RetIndex:0

CompName:3-[3-(4-Methylbenzenesulfonyl)oxy]propyl]furan \$\$

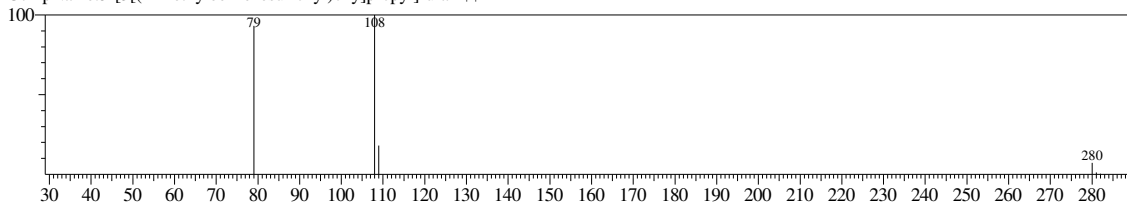

Hit#3 Entry:39284 Library:WILEY7.LIB

SI:74 Formula:C8 H9 N O2 CAS:1007-49-4 MolWeight:151 RetIndex:0

CompName:2-Pyridinemethanol, acetate (ester) (CAS) 2-PICOLYL ACETATE \$\$ 2-Pyridylmethyl acetate \$\$ 2-(Acetoxymethyl)pyridine \$\$ 2-Pyridylcart

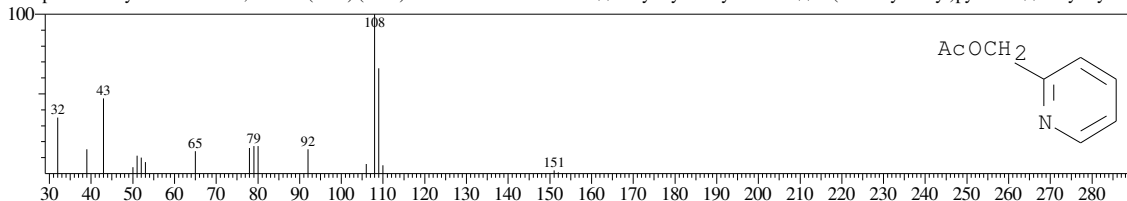

Hit#4 Entry:55443 Library:WILEY7.LIB

SI:74 Formula:C11 H18 O CAS:37709-71-0 MolWeight:166 RetIndex:0

CompName:1-(1,3-DIMETHYLCYCLOHEX-2-ENYL)PROPAN-2-ONE (CAS) 2-Propanone, 1-(1,3-dimethyl-2-cyclohexen-1-yl)- (CAS)

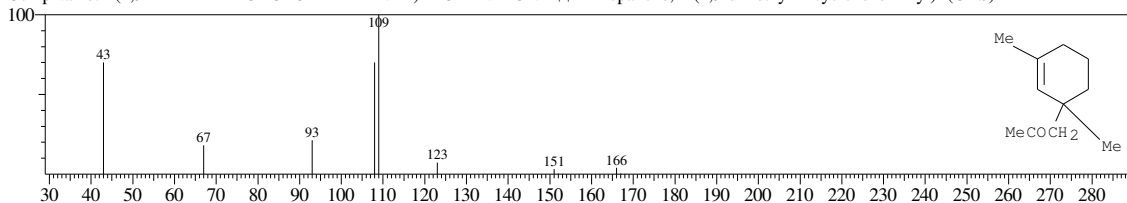

Hit#5 Entry:55111 Library:WILEY7.LIB

SI:73 Formula:C10 H14 O2 CAS:57743-65-4 MolWeight:166 RetIndex:0

CompName:3,3-Dimethyl-3a,4,5,6-tetrahydro-1(3H)-isobenzofuranone (CAS) 1(3H)-Isobenzofuranone, 3a,4,5,6-tetrahydro-3,3-dimethyl- (CAS)

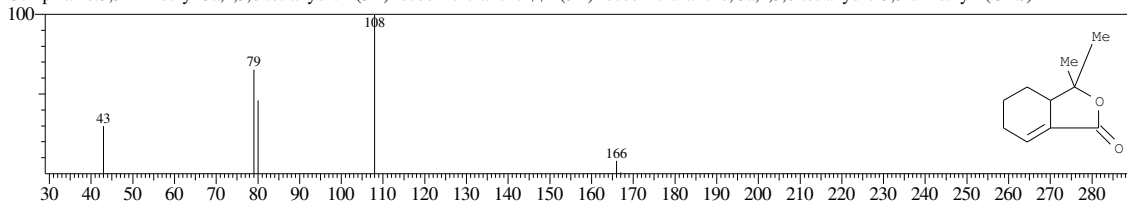

<< Target >>

Line#:7 R.Time:22.260(Scan#:2127) MassPeaks:8

RawMode:Averaged 22.250-22.270(2126-2128) BasePeak:41.05(1471)

BG Mode:Calc. from Peak Group 1 - Event 1

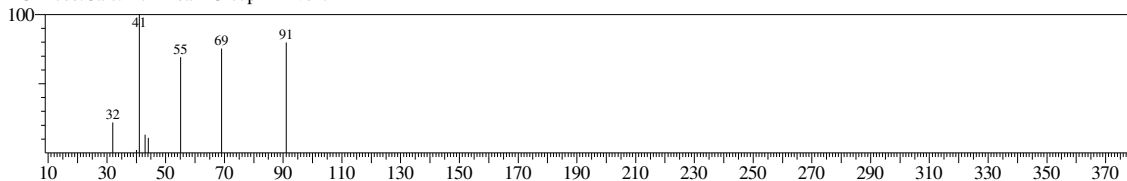

Hit#:1 Entry:240634 Library:WILEY7.LIB

SI:80 Formula:C21 H32 O3 CAS:138750-66-0 MolWeight:332 RetIndex:0

CompName:[3R-(3.alpha.,3a.alpha.,5aS,7a.alpha.,11a.beta.,11b.alpha.)]-(+)-1,3,3a,6,7,7a,8,9,10,11,11a,11b-Dodecahydro-3-hydroxy-8,8,11a-trimethyl-2H-

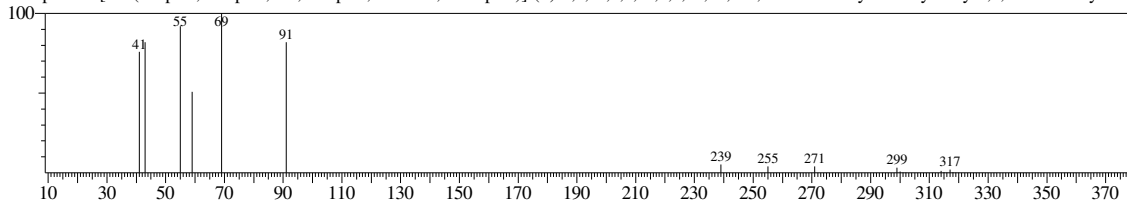

Hit#:2 Entry:136163 Library:WILEY7.LIB

SI:77 Formula:C17 H28 CAS:6742-54-7 MolWeight:232 RetIndex:0

CompName:Benzene, undecyl- (CAS) Undecylbenzene \$\$ 1-Phenylundecane \$\$ n-Undecylbenzene \$\$ Undecane, 1-phenyl- \$\$ phenyl undecane \$\$ Phenyl

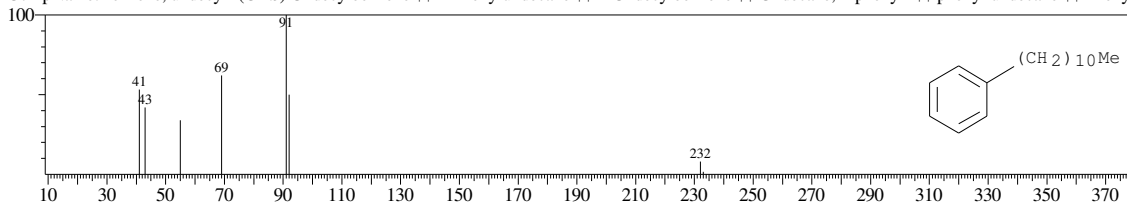

Hit#:3 Entry:30713 Library:WILEY7.LIB

SI:75 Formula:C7 H10 O3 CAS:0-00-0 MolWeight:142 RetIndex:0

CompName:Ethyl 3,4-dihydrofuran-2-carboxylate \$\$

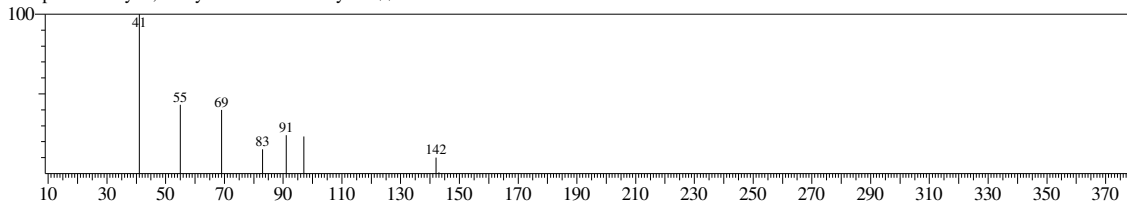

Hit#:4 Entry:218703 Library:WILEY7.LIB

SI:75 Formula:C17 H24 O3 S CAS:0-00-0 MolWeight:308 RetIndex:0

CompName:1-[[[3-ethyl-2-(2-propenyloxy)-2-pentenyl]sulfonyl]-4-methylbenzene \$\$

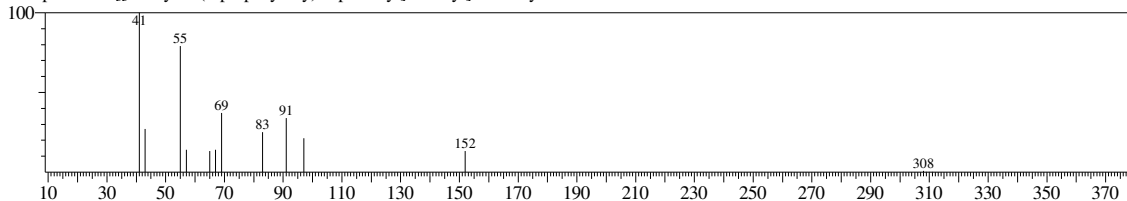

Hit#:5 Entry:265993 Library:WILEY7.LIB

SI:75 Formula:C19 H20 N4 O4 CAS:0-00-0 MolWeight:368 RetIndex:0

CompName:6-(Benzamido)-7-deaza-9-( 2',3'-dideoxy-.beta.-D-glucopyranosyl)purine \$\$

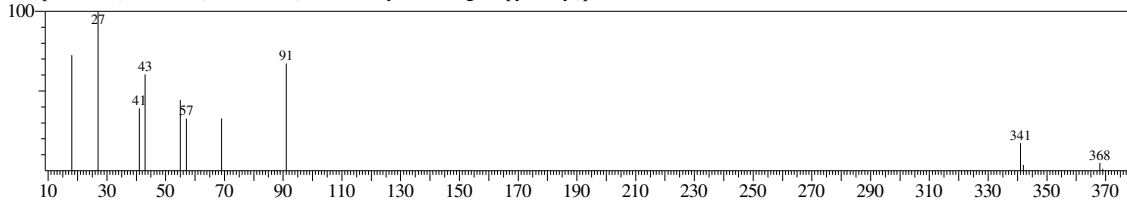

<< Target >>

Line# 8 R.Time: 22.880 (Scan#: 2189) MassPeaks: 10

RawMode: Averaged 22.870-22.890 (2188-2190) BasePeak: 91.00 (2491)

BG Mode: Calc. from Peak Group 1 - Event 1

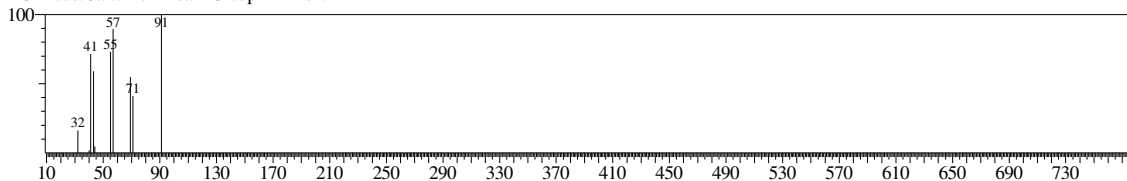

Hit#1 Entry: 336061 Library: WILEY7.LIB

SI: 89 Formula: C<sub>48</sub>H<sub>40</sub>N<sub>2</sub>O<sub>6</sub>S CAS: 0-00-0 MolWeight: 772 RetIndex: 0

CompName: Bis-[3-oxo-6'-diethylamino-spiro(phthalan-1,9'-xanth-2'-yl)sulphide

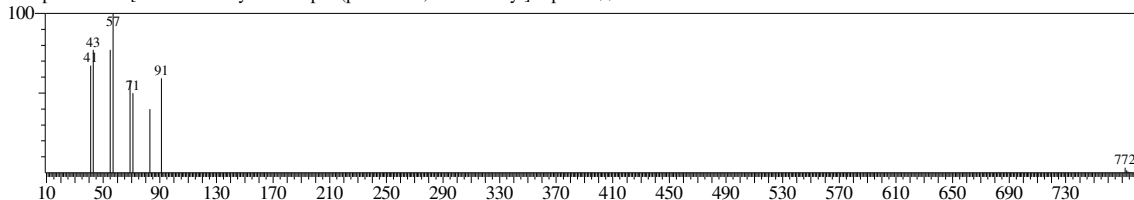

Hit#2 Entry: 168858 Library: WILEY7.LIB

SI: 85 Formula: C<sub>16</sub>H<sub>33</sub>Cl CAS: 4860-03-1 MolWeight: 260 RetIndex: 0

CompName: Hexadecane, 1-chloro- (CAS) 1-Chlorohexadecane Cetyl chloride Hexadecyl chloride Palmityl chloride 1-Chloro-hexadecane

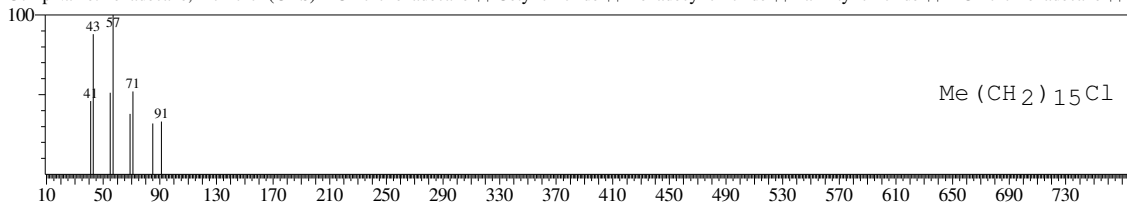

Hit#3 Entry: 265993 Library: WILEY7.LIB

SI: 84 Formula: C<sub>19</sub>H<sub>20</sub>N<sub>4</sub>O<sub>4</sub> CAS: 0-00-0 MolWeight: 368 RetIndex: 0

CompName: 6-(Benzamido)-7-deaza-9-( 2',3'-dideoxy-.beta.-D-glucopyranosyl)purine

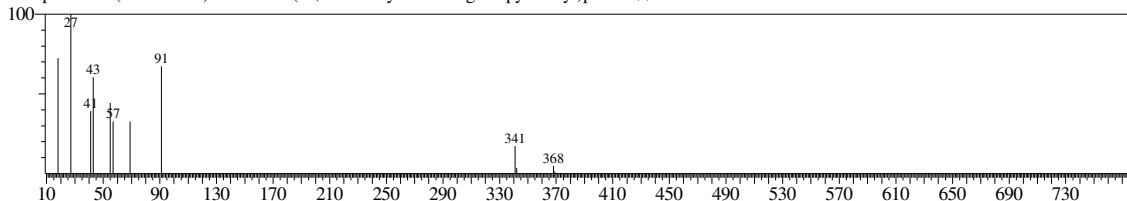

Hit#4 Entry: 311356 Library: WILEY7.LIB

SI: 82 Formula: C<sub>23</sub>H<sub>14</sub>BrN<sub>3</sub>O<sub>4</sub> CAS: 90181-05-8 MolWeight: 475 RetIndex: 0

CompName: 1-(7-bromoquinoline-5,8-quinon-2-yl)-3-(methoxy-carbonyl)-4-methyl-.beta.-carboline 9H-Pyrido[3,4-b]indole-3-carboxylic acid, 1-(7-bromo

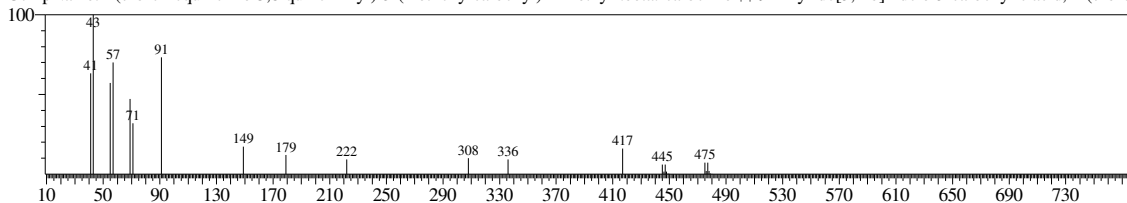

Hit#5 Entry: 292771 Library: WILEY7.LIB

SI: 80 Formula: C<sub>23</sub>H<sub>30</sub>O<sub>3</sub>S<sub>2</sub> CAS: 97644-69-4 MolWeight: 418 RetIndex: 0

CompName: (4.alpha.,10.beta.,15S)-4-carbomethoxy-3-desoxy-15-hydroxy-4-methyl-17,17-(ethylenedithio)-18-norandrost-8,11,13-triene (4.alpha.,10.b

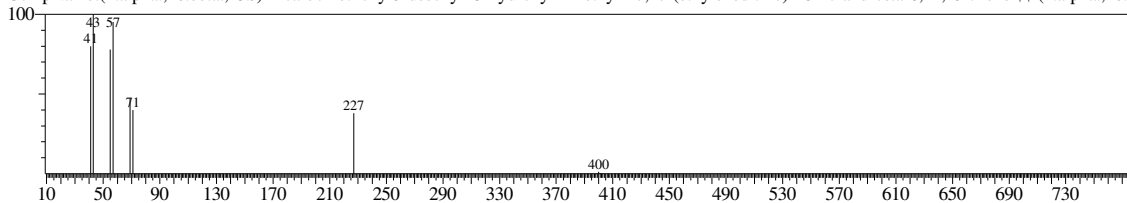

<< Target >>

Line#:9 R.Time:23.280(Scan#:2229) MassPeaks:5

RawMode:Averaged 23.270-23.290(2228-2230) BasePeak:57.05(1171)

BG Mode:Calc. from Peak Group 1 - Event 1

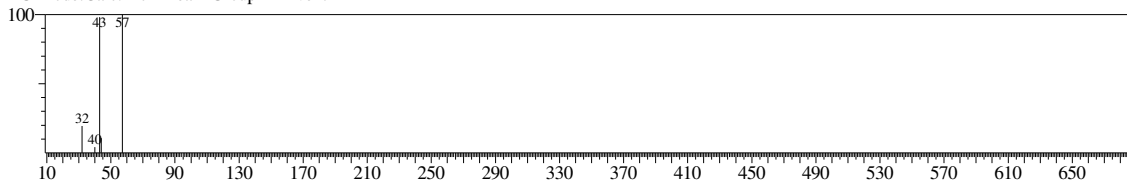

Hit#:1 Entry:112947 Library:WILEY7.LIB

SI:91 Formula:C13 H26 O2 CAS:40657-11-2 MolWeight:214 RetIndex:0

CompName:acetonil decyl ether \$\$

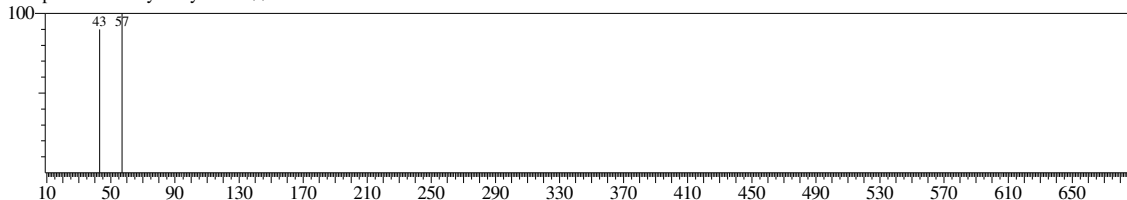

Hit#:2 Entry:7673 Library:WILEY7.LIB

SI:89 Formula:C4 H6 O3 CAS:0-00-0 MolWeight:102 RetIndex:0

CompName:1-Propenyl ester of carbonic acid \$\$

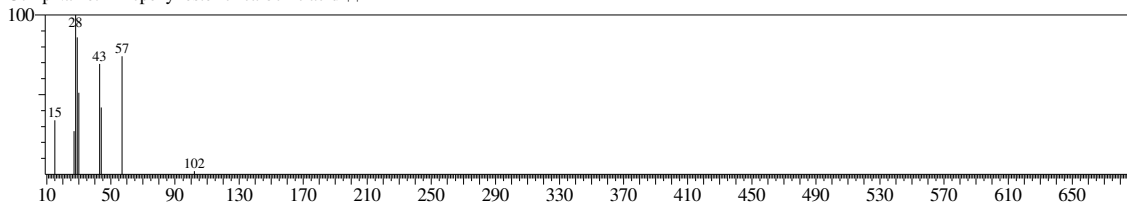

Hit#:3 Entry:114199 Library:WILEY7.LIB

SI:89 Formula:C8 H13 N3 O4 CAS:0-00-0 MolWeight:215 RetIndex:0

CompName:1-O-Acetyl-2-azido-2,3,6-trideoxy-.alpha.-DL-ribo-hexopyranose \$\$

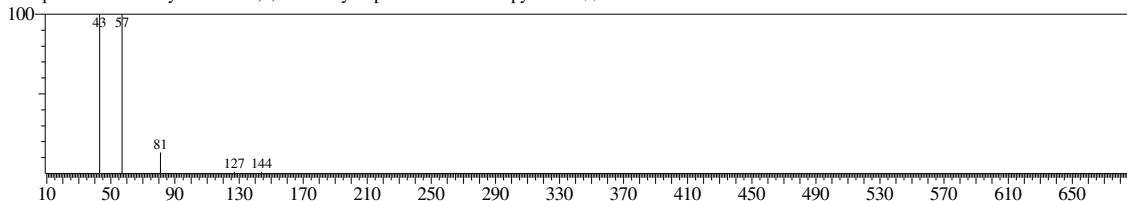

Hit#:4 Entry:333817 Library:WILEY7.LIB

SI:85 Formula:C46 H72 O4 CAS:0-00-0 MolWeight:689 RetIndex:0

CompName:5,6,7-tris( Decyloxy)-10-methyl-9-phenanthrenecarbaldehyde \$\$

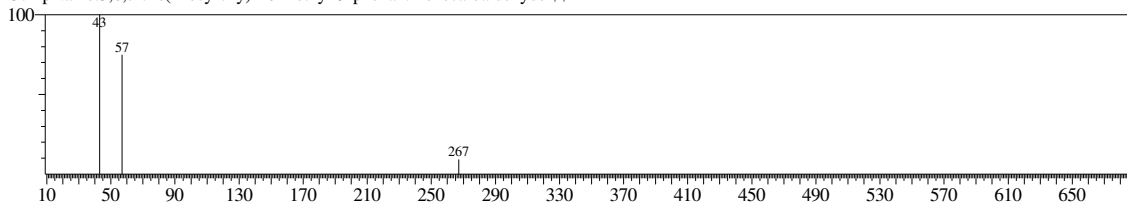

Hit#:5 Entry:253921 Library:WILEY7.LIB

SI:85 Formula:C19 H36 Cl2 O CAS:84987-62-2 MolWeight:350 RetIndex:0

CompName:trans-1,1-Dichloro-3-nonadecen-2-ol \$3-Nonadecen-2-ol, 1,1-dichloro-, (E)- (CAS)

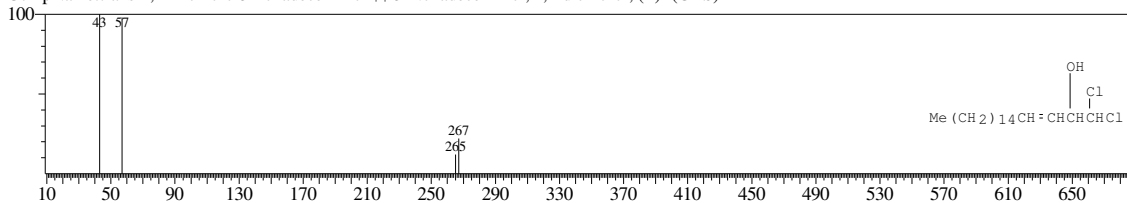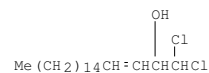

<< Target >>

Line#:10 R.Time:23.890(Scan#:2290) MassPeaks:21

RawMode:Averaged 23.880-23.900(2289-2291) BasePeak:55.05(6768)

BG Mode:Calc. from Peak Group 1 - Event 1

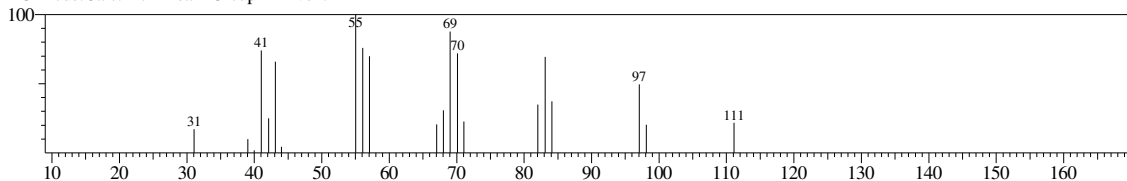

Hit#:1 Entry:79256 Library:WILEY7.LIB

SI:93 Formula:C12 H26 O CAS:112-53-8 MolWeight:186 RetIndex:0

CompName:1-Dodecanol (CAS) n-Dodecanol \$\$ CO 12 \$\$ S 1298 \$\$ Dodecanol \$\$ Pisol \$\$ Alfol 12 \$\$ Sipol L 12 \$\$ Lauryl 24 \$\$ Siponol 25 \$\$ Siponol

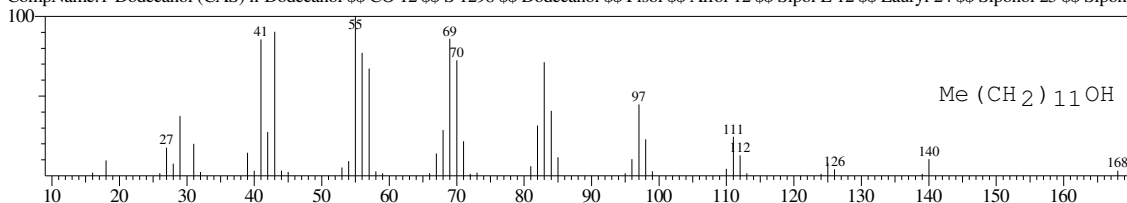

Hit#:2 Entry:79259 Library:WILEY7.LIB

SI:92 Formula:C12 H26 O CAS:112-53-8 MolWeight:186 RetIndex:0

CompName:1-Dodecanol (CAS) n-Dodecanol \$\$ CO 12 \$\$ S 1298 \$\$ Dodecanol \$\$ Pisol \$\$ Alfol 12 \$\$ Sipol L 12 \$\$ Lauryl 24 \$\$ Siponol 25 \$\$ Siponol

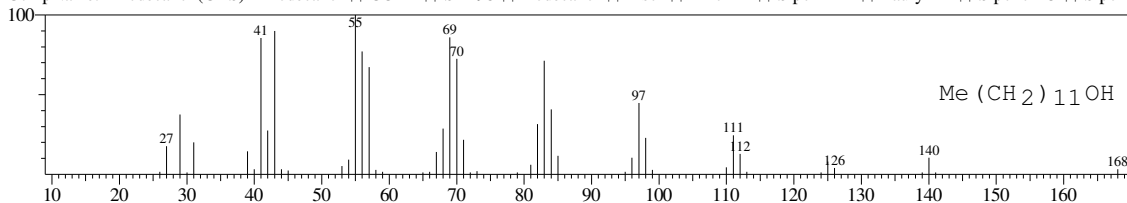

Hit#:3 Entry:79270 Library:WILEY7.LIB

SI:92 Formula:C12 H26 O CAS:112-53-8 MolWeight:186 RetIndex:0

CompName:1-Dodecanol (CAS) n-Dodecanol \$\$ CO 12 \$\$ S 1298 \$\$ Dodecanol \$\$ Pisol \$\$ Alfol 12 \$\$ Sipol L 12 \$\$ Lauryl 24 \$\$ Siponol 25 \$\$ Siponol

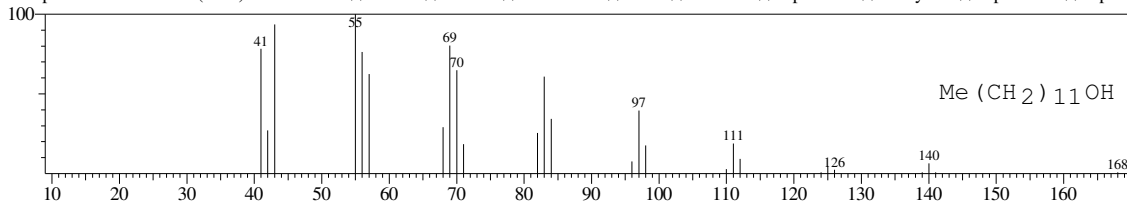

Hit#:4 Entry:63450 Library:WILEY7.LIB

SI:92 Formula:C11 H24 O CAS:112-42-5 MolWeight:172 RetIndex:0

CompName:1-Undecanol (CAS) n-Undecanol \$\$ 1-Hendecanol \$\$ n-Undecan-1-ol \$\$ Undecyl alcohol \$\$ Hendecyl alcohol \$\$ n-Undecyl alcohol \$\$ Hend

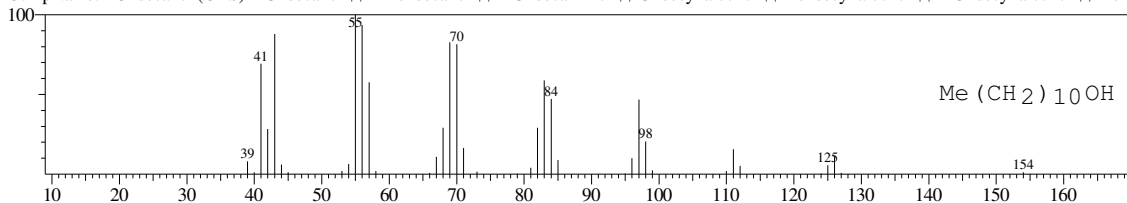

Hit#:5 Entry:63446 Library:WILEY7.LIB

SI:92 Formula:C11 H24 O CAS:112-42-5 MolWeight:172 RetIndex:0

CompName:1-Undecanol (CAS) n-Undecanol \$\$ 1-Hendecanol \$\$ n-Undecan-1-ol \$\$ Undecyl alcohol \$\$ Hendecyl alcohol \$\$ n-Undecyl alcohol \$\$ Hend

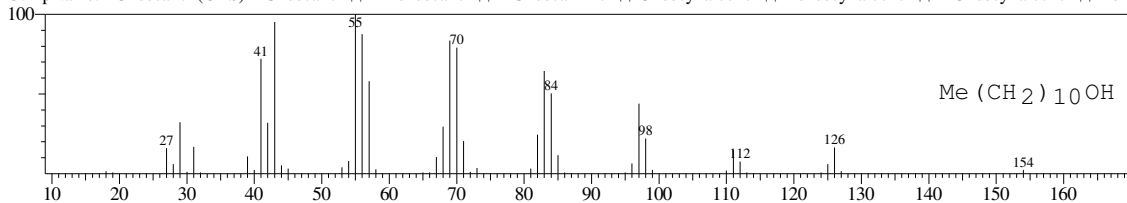

<< Target >>

Line#:11 R.Time:26.870(Scan#:2588) MassPeaks:10

RawMode:Averaged 26.860-26.880(2587-2589) BasePeak:55.05(1686)

BG Mode:Calc. from Peak Group 1 - Event 1

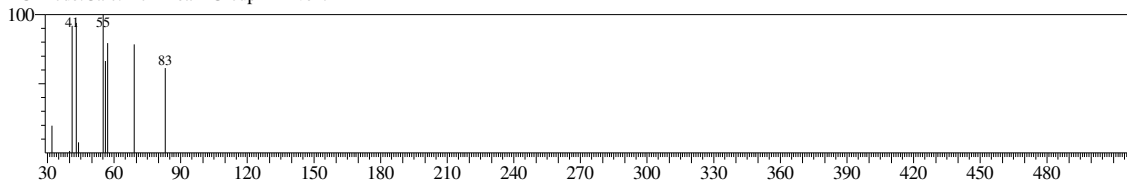

Hit#:1 Entry:113629 Library:WILEY7.LIB

SI:92 Formula:C14 H30 O CAS:112-72-1 MolWeight:214 RetIndex:0

CompName:1-Tetradecanol (CAS) Alfol 14 Tetradecanol Loxanol V Lanette K Lanette Wax KS n-Tetradecanol Myristic alcohol Myr

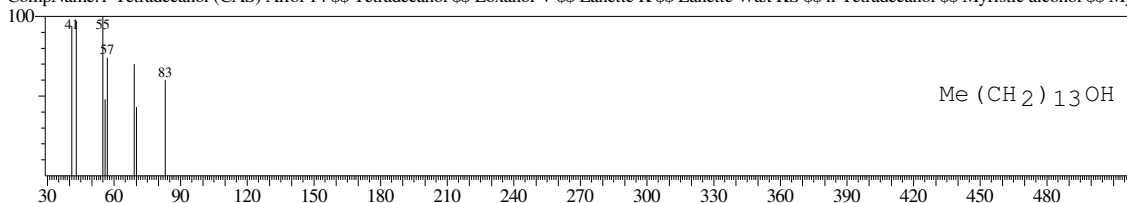

Hit#:2 Entry:180546 Library:WILEY7.LIB

SI:91 Formula:C18 H38 O CAS:0-00-0 MolWeight:270 RetIndex:0

CompName:Bis-(3,5,5-trimethylhexyl) ether

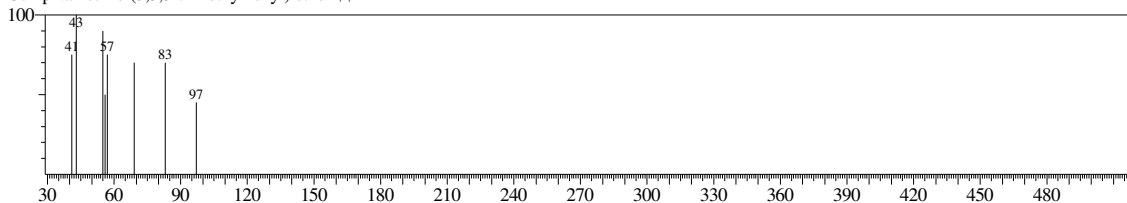

Hit#:3 Entry:131524 Library:WILEY7.LIB

SI:91 Formula:C15 H32 O CAS:629-76-5 MolWeight:228 RetIndex:0

CompName:1-Pentadecanol (CAS) Pentadecanol n-Pentadecanol n-1-Pentadecanol Pentadecyl alcohol Pentadecanol-(1)

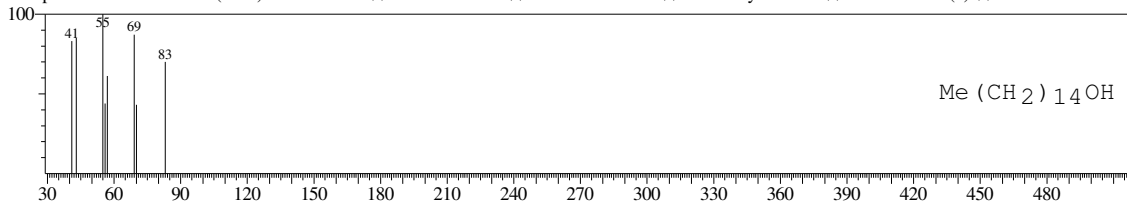

Hit#:4 Entry:79272 Library:WILEY7.LIB

SI:90 Formula:C12 H26 O CAS:112-53-8 MolWeight:186 RetIndex:0

CompName:1-Dodecanol (CAS) n-Dodecanol CO 12 S 1298 Dodecanol Pisol Alfol 12 Sipol L 12 Lauryl 24 Siponol 25 Siponol

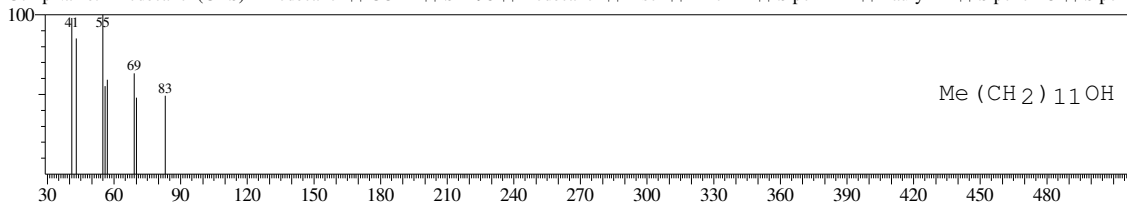

Hit#:5 Entry:319241 Library:WILEY7.LIB

SI:89 Formula:C30 H58 O4 S CAS:123-28-4 MolWeight:514 RetIndex:0

CompName:DI-LAURYL THIO-DI-PROPIONATE Propanoic acid, 3,3'-thiobis-, didodecyl ester (CAS) DLT DLTP DLTDP DMPTP PS 8

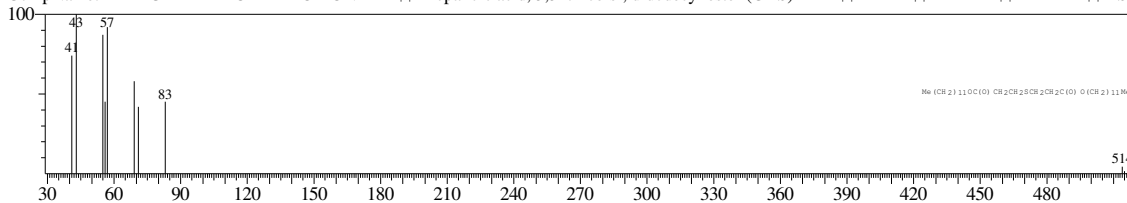

<< Target >>

Line#:12 R.Time:27.900(Scan#:2691) MassPeaks:6

RawMode:Averaged 27.890-27.910(2690-2692) BasePeak:57.05(1350)

BG Mode:Calc. from Peak Group 1 - Event 1

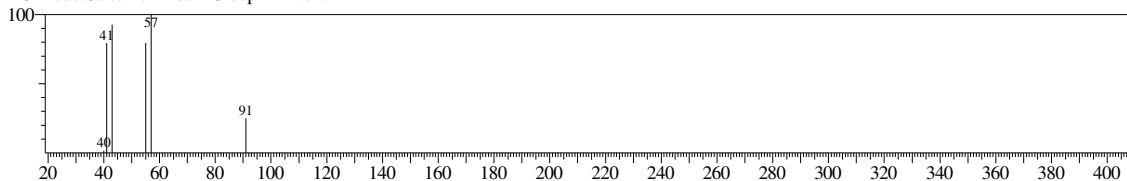

Hit#:1 Entry:31744 Library:WILEY7.LIB

SI:87 Formula:C9 H18 O CAS:22104-79-6 MolWeight:142 RetIndex:0

CompName:2-Nonen-1-ol \$\$

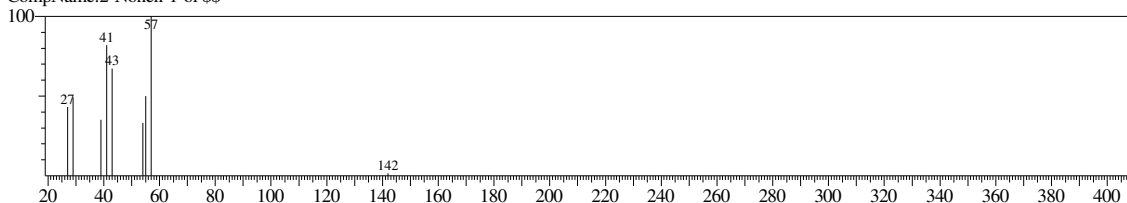

Hit#:2 Entry:19952 Library:WILEY7.LIB

SI:83 Formula:C8 H16 O CAS:0-00-0 MolWeight:128 RetIndex:0

CompName:2,4,4-Trimethyl-2-penten-1-ol \$\$

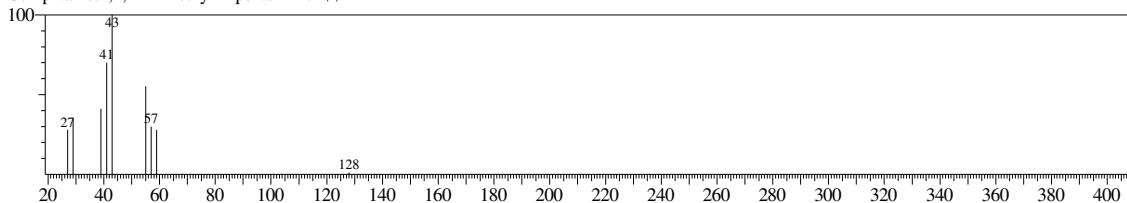

Hit#:3 Entry:8842 Library:WILEY7.LIB

SI:83 Formula:C5 H11 Cl CAS:753-89-9 MolWeight:106 RetIndex:0

CompName:Propane, 1-chloro-2,2-dimethyl- (CAS) Neopentyl chloride \$\$ 1-Chloro-2,2-dimethylpropane \$\$ t-C4H9CH2Cl \$\$

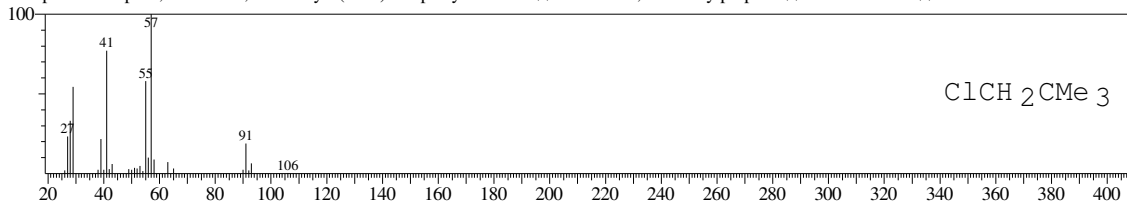

Hit#:4 Entry:285258 Library:WILEY7.LIB

SI:82 Formula:C22 H26 O7 CAS:65527-39-1 MolWeight:402 RetIndex:0

CompName:Bicyclo[3.2.1]oct-3-en-2-one, 8-hydroxy-1,3-dimethoxy-7-(7-methoxy-1,3-benzodioxol-5-yl)-6-methyl-5-(2-propenyl)-, [1R-(6-endo,7-exo,8-s

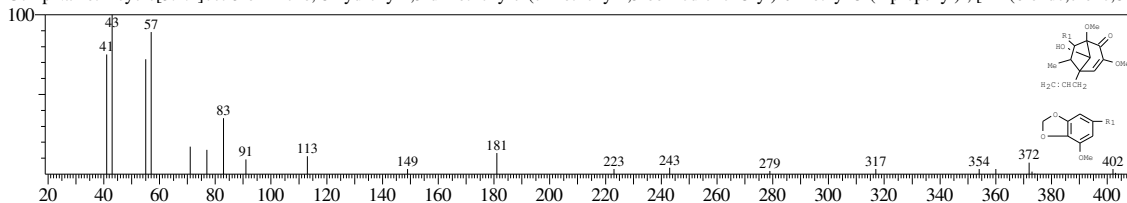

Hit#:5 Entry:31740 Library:WILEY7.LIB

SI:82 Formula:C9 H18 O CAS:31502-14-4 MolWeight:142 RetIndex:0

CompName:2-Nonen-1-ol, (E)- (CAS) trans-2-Nonenol \$\$ (E)-2-nonen-1-ol \$\$ trans-2-Nonen-1-ol \$\$ trans-NON-2-ENOL \$\$ NON-2-EN-1-OL \$\$

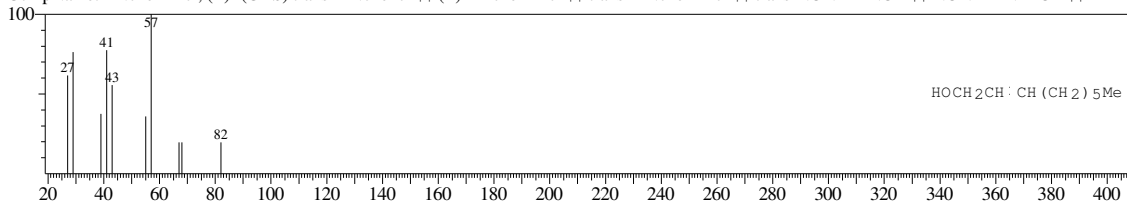

<< Target >>

Line#:13 R.Time:28.450(Scan#:2746) MassPeaks:5

RawMode:Averaged 28.440-28.460(2745-2747) BasePeak:83.05(1793)

BG Mode:Calc. from Peak Group 1 - Event 1

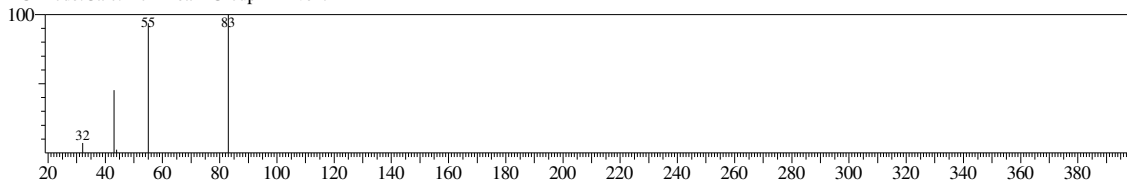

Hit#:1 Entry:278082 Library:WILEY7.LIB

SI:92 Formula:C22 H28 O6 CAS:63366-03-0 MolWeight:388 RetIndex:0

CompName:6.BETA.-ACETOXY-3.ALPHA.-ANGELOYLOXY-1,10.BETA.-EPOXYFURANOLREMOPHILAN \$\$ 2-Butenoic acid, 2-methyl-, 5-(acet

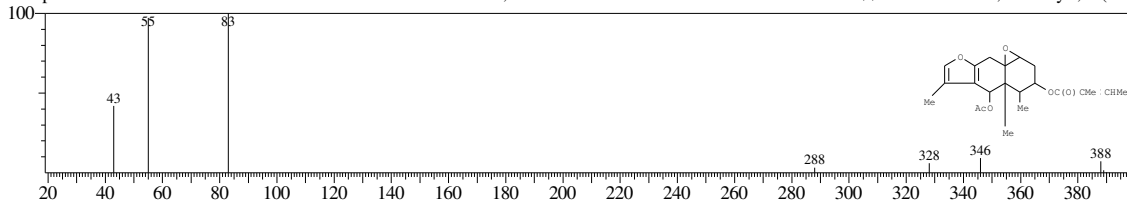

Hit#:2 Entry:18200 Library:WILEY7.LIB

SI:90 Formula:C7 H10 O2 CAS:129137-87-7 MolWeight:126 RetIndex:0

CompName:2-acetyl-3,4-dihydro-2H-pyran \$\$

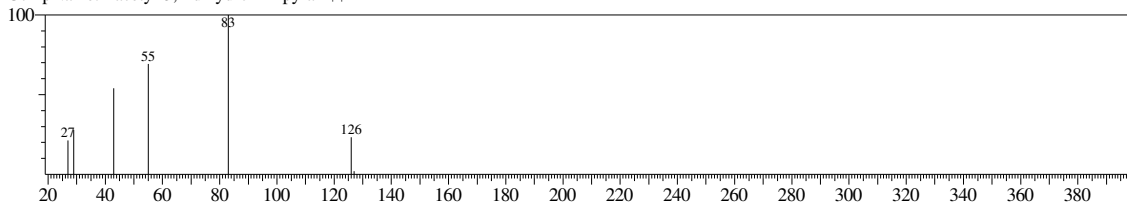

Hit#:3 Entry:91495 Library:WILEY7.LIB

SI:86 Formula:C10 H15 N O3 CAS:77413-79-7 MolWeight:197 RetIndex:0

CompName:O-Acetyl-N-allyl-N-pent-4-enoylhydroxylamine \$\$ 4-Pentenamide, N-(acetyloxy)-N-2-propenyl- (CAS)

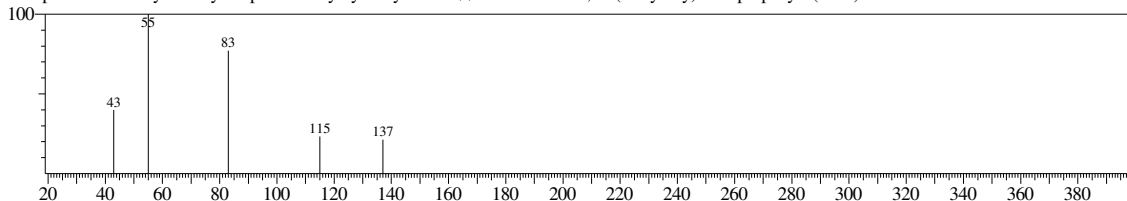

Hit#:4 Entry:27443 Library:WILEY7.LIB

SI:86 Formula:C9 H14 O CAS:0-00-0 MolWeight:138 RetIndex:0

CompName:1,3,8-Nonatrien-5-ol \$\$

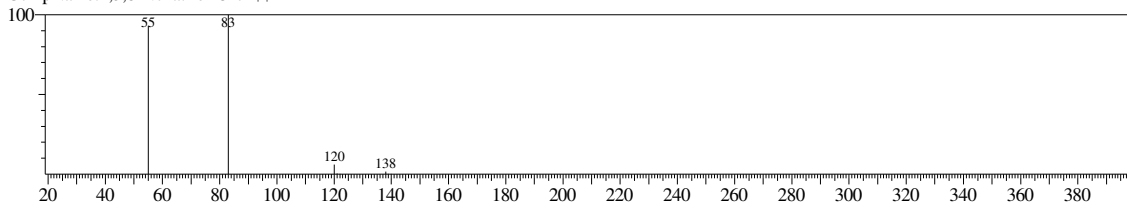

Hit#:5 Entry:73368 Library:WILEY7.LIB

SI:86 Formula:C10 H14 O3 CAS:0-00-0 MolWeight:182 RetIndex:0

CompName:(E)-2-Methylbut-2-enoic Anhydride \$\$

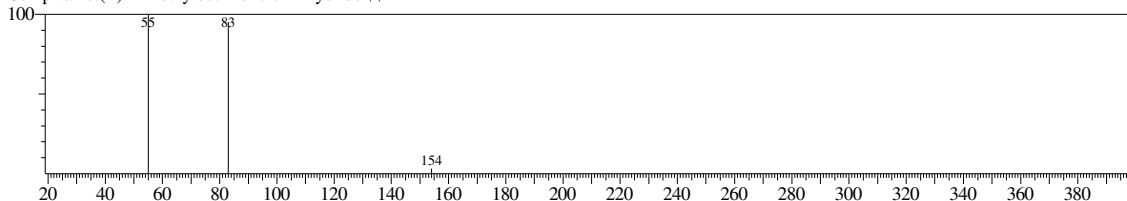

<< Target >>

Line#:14 R.Time:28.780(Scan#:2779) MassPeaks:15

RawMode:Averaged 28.770-28.790(2778-2780) BasePeak:55.05(2882)

BG Mode:Calc. from Peak Group 1 - Event 1

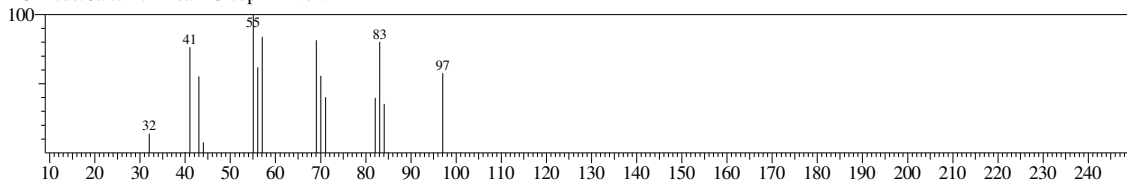

Hit#:1 Entry:143899 Library:WILEY7.LIB

SI:86 Formula:C17 H34 CAS:6765-39-5 MolWeight:238 RetIndex:0

CompName:1-Heptadecene (CAS) Hexahydroaplotaxene \$\$

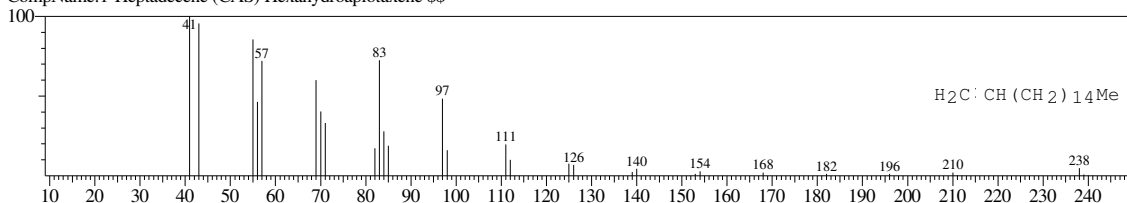

Hit#:2 Entry:148432 Library:WILEY7.LIB

SI:86 Formula:C16 H34 O CAS:36653-82-4 MolWeight:242 RetIndex:0

CompName:1-Hexadecanol (CAS) Cetal \$\$ Ethal \$\$ Ethol \$\$ Cetanol \$\$ Cetylol \$\$ Adol 52 \$\$ Lanol C \$\$ Adol 54 \$\$ Lorol 24 \$\$ Alfol 16 \$\$ Aldol 54 \$

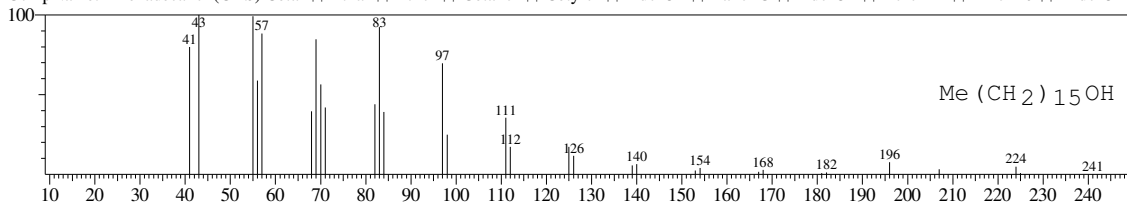

Hit#:3 Entry:79270 Library:WILEY7.LIB

SI:86 Formula:C12 H26 O CAS:112-53-8 MolWeight:186 RetIndex:0

CompName:1-Dodecanol (CAS) n-Dodecanol \$\$ CO 12 \$\$ S 1298 \$\$ Dodecanol \$\$ Pisol \$\$ Alfol 12 \$\$ Sipol L 12 \$\$ Lauryl 24 \$\$ Siponol 25 \$\$ Siponol

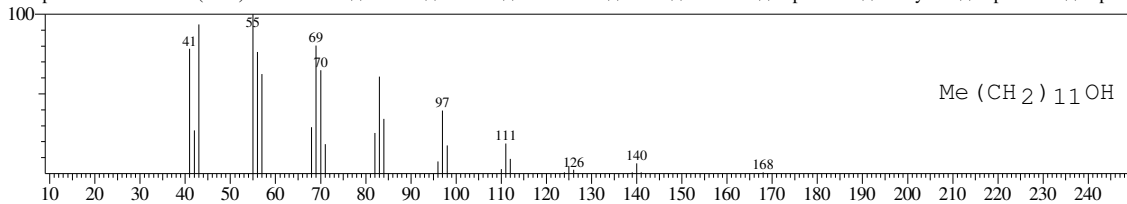

Hit#:4 Entry:108952 Library:WILEY7.LIB

SI:86 Formula:C15 H30 CAS:13360-61-7 MolWeight:210 RetIndex:0

CompName:1-Pentadecene (CAS) Pentadec-1-ene \$\$ Pentadecene,1- \$\$

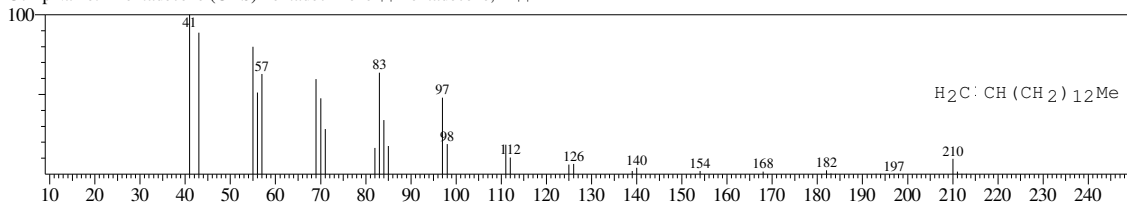

Hit#:5 Entry:22026 Library:WILEY7.LIB

SI:85 Formula:C8 H18 O CAS:1653-40-3 MolWeight:130 RetIndex:0

CompName:1-Heptanol, 6-methyl- (CAS) 6-Methyl-1-heptanol \$\$

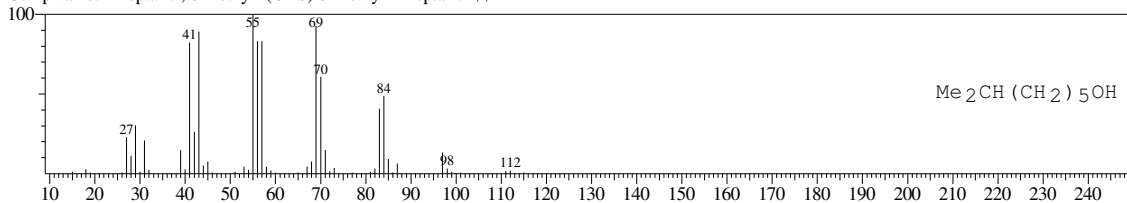

<< Target >>

Line#:15 R.Time:32.060(Scan#:3107) MassPeaks:27

RawMode:Averaged 32.050-32.070(3106-3108) BasePeak:45.05(8805)

BG Mode:Calc. from Peak Group 1 - Event 1

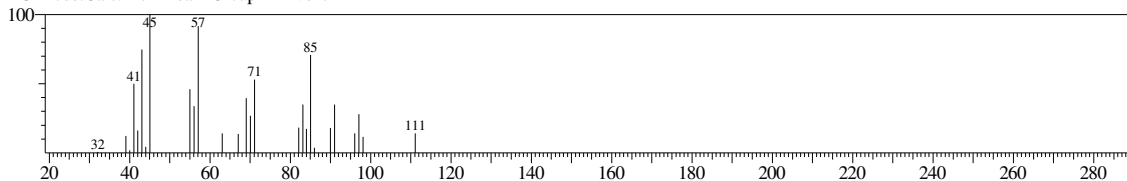

Hit#:1 Entry:133808 Library:WILEY7.LIB

SI:83 Formula:C14 H30 O2 CAS:4536-30-5 MolWeight:230 RetIndex:0

CompName:Ethanol, 2-(dodecyloxy)- (CAS) DODECOXYETHANOL \$\$ 2-Dodecyloxyethanol \$\$ Laureth-1 \$\$ Lipocol I-1 \$\$ Lauryl ethoxylate \$\$ 2-(Dc

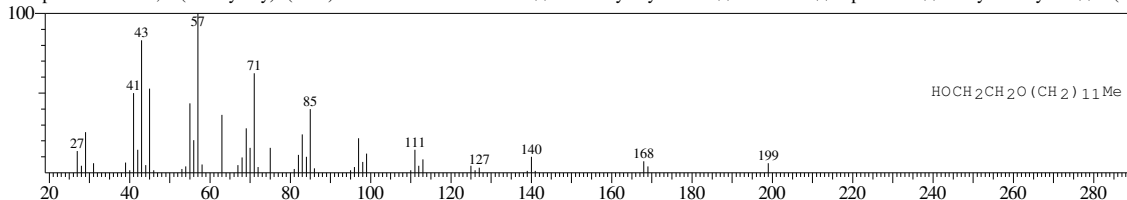

Hit#:2 Entry:224898 Library:WILEY7.LIB

SI:83 Formula:C20 H42 O2 CAS:2136-72-3 MolWeight:314 RetIndex:0

CompName:Ethanol, 2-(octadecyloxy)- (CAS) 2-OCTADECYLOXY ETHANOL \$\$ 2-Octadecyloxyethanol \$\$ 2-Octadecyloxyethanol \$\$ Ethylene glycol n

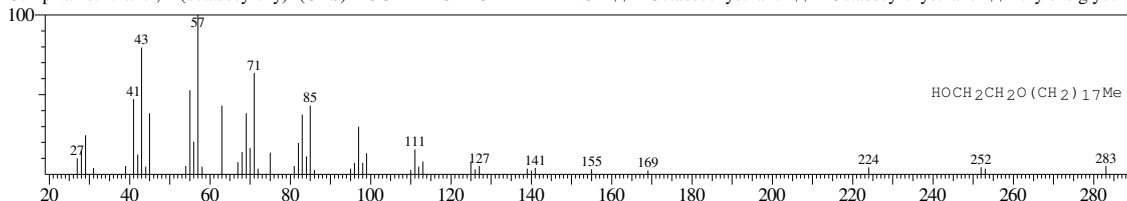

Hit#:3 Entry:197671 Library:WILEY7.LIB

SI:82 Formula:C18 H38 O2 CAS:2136-71-2 MolWeight:286 RetIndex:0

CompName:Ethanol, 2-(hexadecyloxy)- (CAS) 2-HEXADECYLOXY-ETHANOL \$\$ 2-Hexadecyloxyethanol \$\$ 2-HEXADECYLOXY-ETHANOL \$\$ Ethylene glycol

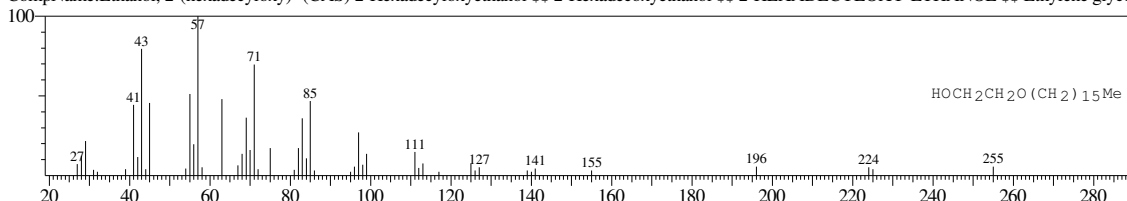

Hit#:4 Entry:32934 Library:WILEY7.LIB

SI:82 Formula:C9 H20 O CAS:818-81-5 MolWeight:144 RetIndex:0

CompName:1-OCTANOL, 2-METHYL- \$\$

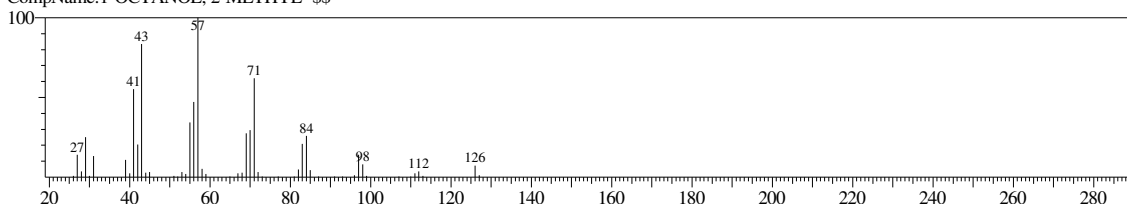

Hit#:5 Entry:62790 Library:WILEY7.LIB

SI:82 Formula:C11 H24 O CAS:18675-24-6 MolWeight:172 RetIndex:0

CompName:1-DECANOL, 2-METHYL- \$\$

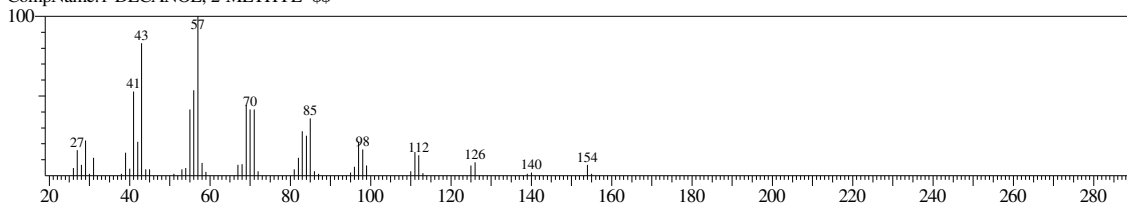

<< Target >>

Line#:16 R.Time:32.990(Scan#:3200) MassPeaks:9

RawMode:Averaged 32.980-33.000(3199-3201) BasePeak:57.05(1210)

BG Mode:Calc. from Peak Group 1 - Event 1

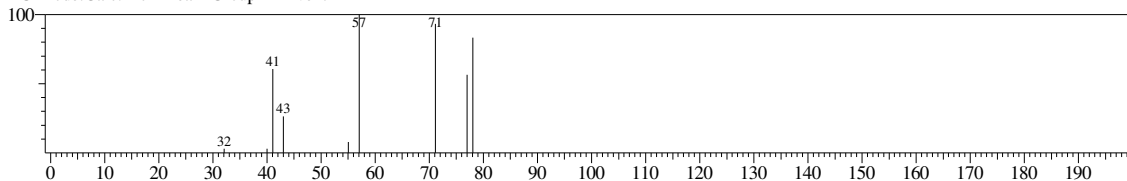

Hit#:1 Entry:3608 Library:WILEY7.LIB

SI:74 Formula:C6 H14 CAS:75-83-2 MolWeight:86 RetIndex:0

CompName:Butane, 2,2-dimethyl- (CAS) 2,2-Dimethylbutane \$\$ Neohexane \$\$ (CH3)3CCH2CH3 \$\$ UN 1208 \$\$ 2,2-dimethylbutane, neohexane \$\$

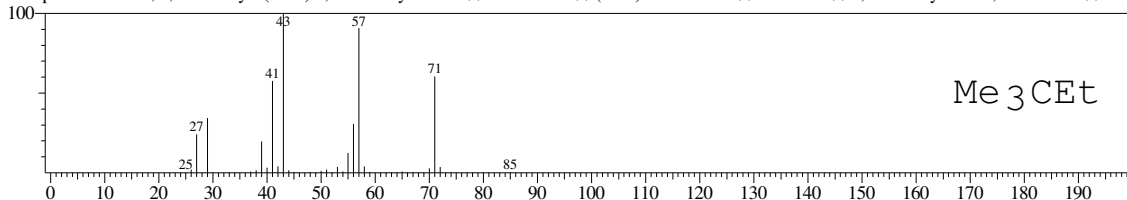

Hit#:2 Entry:20649 Library:WILEY7.LIB

SI:74 Formula:C9 H20 CAS:4032-86-4 MolWeight:128 RetIndex:0

CompName:Heptane, 3,3-dimethyl- (CAS) 3,3-Dimethylheptane \$\$

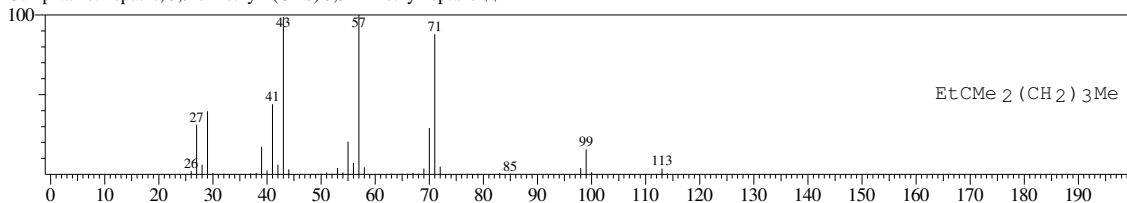

Hit#:3 Entry:3607 Library:WILEY7.LIB

SI:73 Formula:C6 H14 CAS:75-83-2 MolWeight:86 RetIndex:0

CompName:Butane, 2,2-dimethyl- (CAS) 2,2-Dimethylbutane \$\$ Neohexane \$\$ (CH3)3CCH2CH3 \$\$ UN 1208 \$\$ 2,2-dimethylbutane, neohexane \$\$

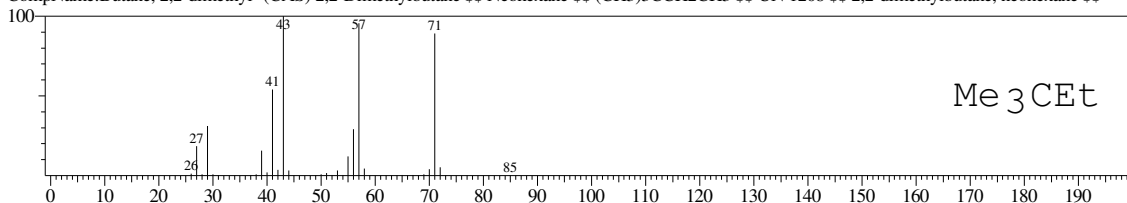

Hit#:4 Entry:132685 Library:WILEY7.LIB

SI:73 Formula:C11 H18 O5 CAS:92778-43-3 MolWeight:230 RetIndex:0

CompName:PROPANEDIOIC ACID, OXO-, BIS(2-METHYLPROPYL) ESTER \$\$

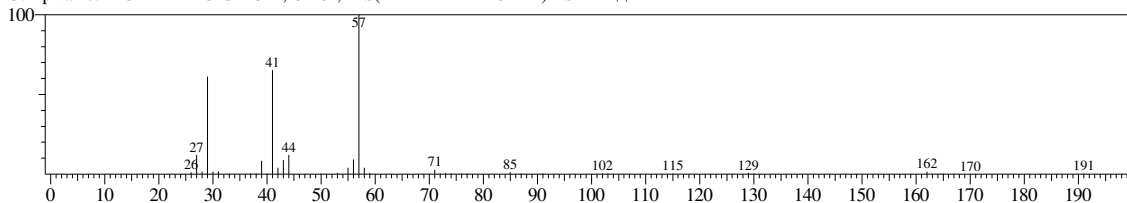

Hit#:5 Entry:178169 Library:WILEY7.LIB

SI:72 Formula:C19 H40 CAS:1560-88-9 MolWeight:268 RetIndex:0

CompName:Octadecane, 2-methyl- (CAS) 2-Methyloctadecane \$\$ 17-Methyloctadecane \$\$

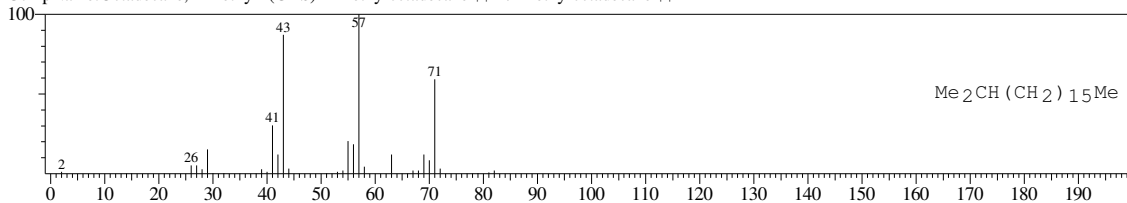

<< Target >>

Line#:17 R.Time:33.190(Scan#:3220) MassPeaks:7

RawMode:Averaged 33.180-33.200(3219-3221) BasePeak:91.05(725)

BG Mode:Calc. from Peak Group 1 - Event 1

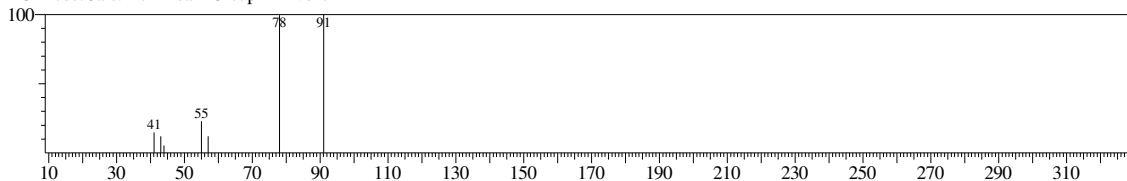

Hit#:1 Entry:67394 Library:WILEY7.LIB

SI:79 Formula:C8 H7 N3 O2 CAS:16714-23-1 MolWeight:177 RetIndex:0

CompName:Methyl 2-azidobenzoate \$\$ Benzoic acid, 2-azido-, methyl ester (CAS) Benzoic acid, o-azido-, methyl ester (CAS) Methyl o-azidobenzoate \$\$

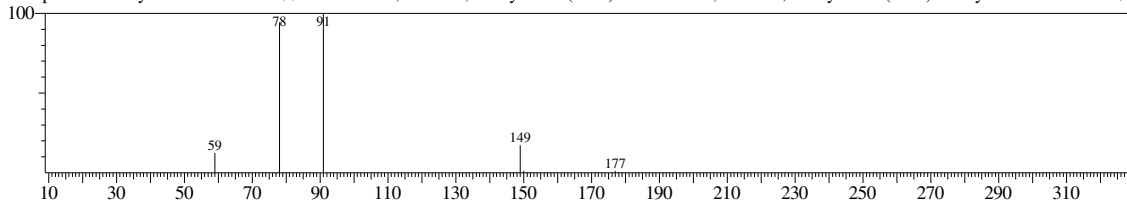

Hit#:2 Entry:8927 Library:WILEY7.LIB

SI:76 Formula:C8 H10 CAS:102575-25-7 MolWeight:106 RetIndex:0

CompName:tricyclo[5.1.0.0(2,8)]oct-4-en \$\$ TRICYCLO[5.1.0.0]OCT-4-ENE \$\$

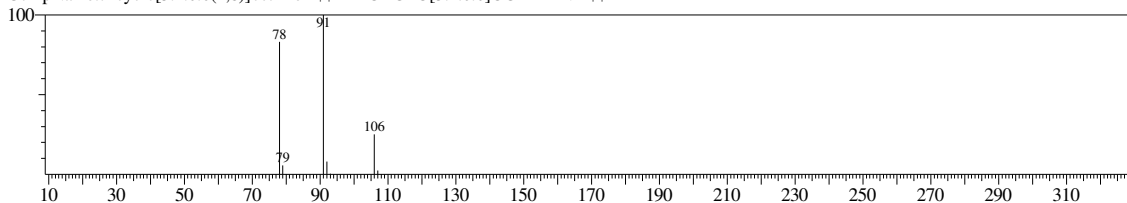

Hit#:3 Entry:8721 Library:WILEY7.LIB

SI:76 Formula:C8 H10 CAS:102575-26-8 MolWeight:106 RetIndex:0

CompName:tricyclo[5.1.0.0(2,8)]oct-3-en \$\$

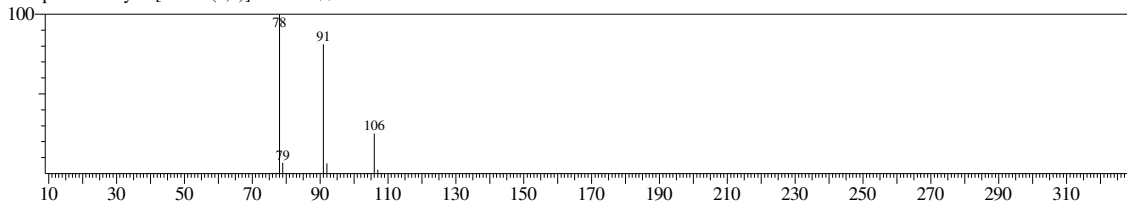

Hit#:4 Entry:229699 Library:WILEY7.LIB

SI:75 Formula:C14 H12 Cl4 CAS:110682-91-2 MolWeight:320 RetIndex:0

CompName:3,4,5,6-tetrachlorospiro[tricyclo[6.3.1.0(2,7)]dodeca-3,5,10-triene-9,1'-cyclopropane \$\$ Spiro[cyclopropane-1,6'-[5,9]methano[6H]benzocyclohex-1,3,5-triene-9,1'-cyclopropane]

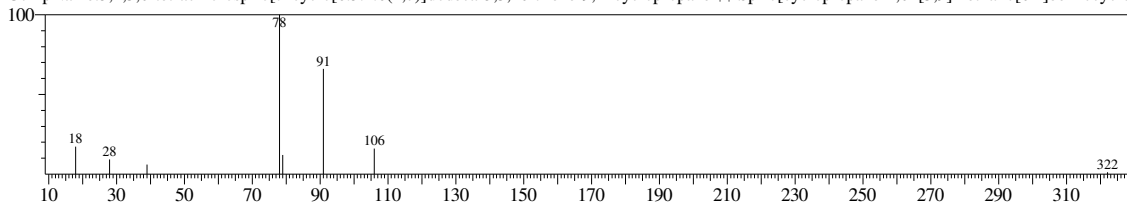

Hit#:5 Entry:101585 Library:WILEY7.LIB

SI:73 Formula:C13 H19 N O CAS:72399-35-0 MolWeight:205 RetIndex:0

CompName:Isobutylmethylketone benzyloxime \$\$

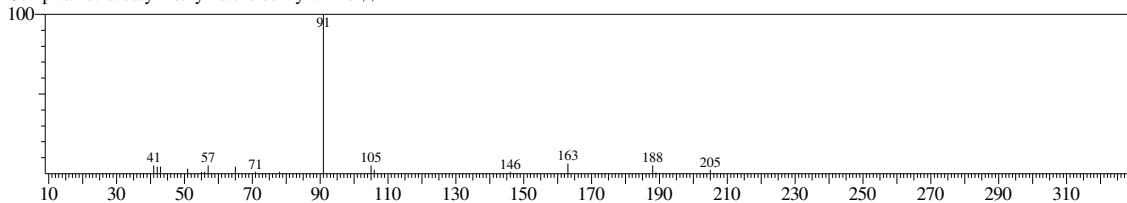

<< Target >>

Line#:18 R.Time:33.420(Scan#:3243) MassPeaks:9

RawMode:Averaged 33.410-33.430(3242-3244) BasePeak:100.05(4084)

BG Mode:Calc. from Peak Group 1 - Event 1

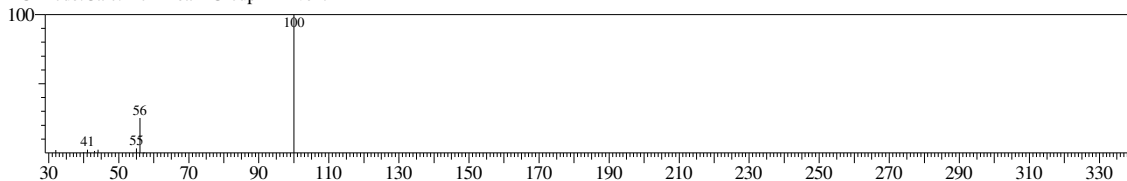

Hit#:1 Entry:111739 Library:WILEY7.LIB

SI:92 Formula:C12 H23 N O2 CAS:116886-03-4 MolWeight:213 RetIndex:0

CompName:1-(3-(morpholin-4-yl)propyl)cyclopentanol \$\$ Cyclopentanol, 1-[3-(4-morpholinyl)propyl]- (CAS)

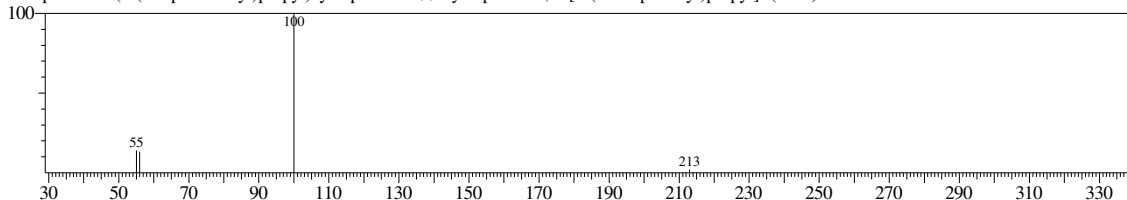

Hit#:2 Entry:238101 Library:WILEY7.LIB

SI:91 Formula:C12 H15 BR N2 O4 CAS:56759-50-3 MolWeight:330 RetIndex:0

CompName:1-(5'-Bromo-2'-nitrophenyl)-2-morpholinoethanol Hydrochloride \$\$ 4-Morpholineethanol, .alpha.-(5-bromo-2-nitrophenyl)-, monohydrochloric

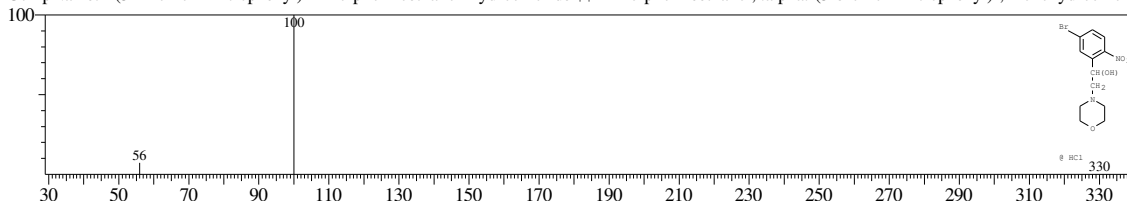

Hit#:3 Entry:264549 Library:WILEY7.LIB

SI:91 Formula:C12 H16 BR CL N2 O4 CAS:0-00-0 MolWeight:366 RetIndex:0

CompName:1-(5'-BROMO-2'-NITROPHENYL)-2-MORPHOLINOETHANOL HYDROCHLORIDE \$\$

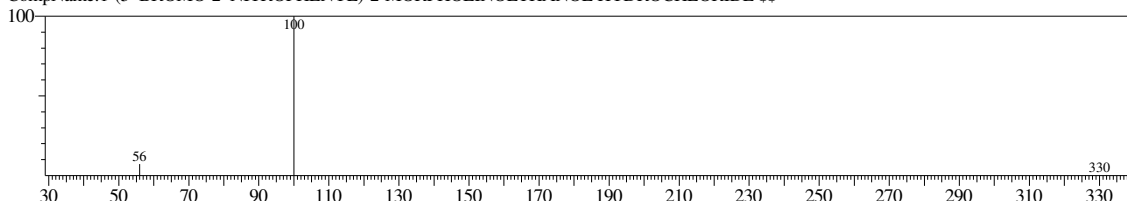

Hit#:4 Entry:111740 Library:WILEY7.LIB

SI:91 Formula:C12 H23 N O2 CAS:116886-09-0 MolWeight:213 RetIndex:0

CompName:1-(2-morpholin-4-yl)ethylcyclohexanol \$\$ Cyclohexanol, 1-[2-(4-morpholinyl)ethyl]- (CAS)

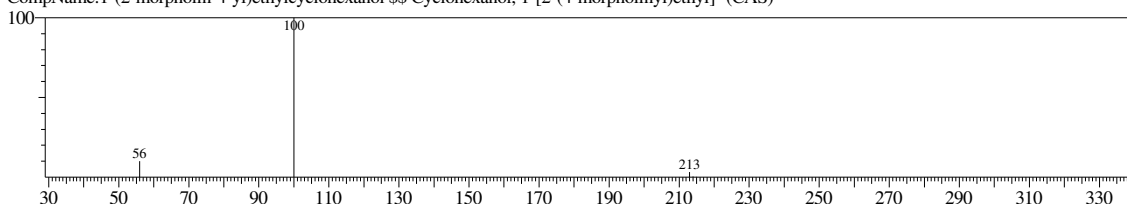

Hit#:5 Entry:238100 Library:WILEY7.LIB

SI:91 Formula:C12 H15 BR N2 O4 CAS:56759-43-4 MolWeight:330 RetIndex:0

CompName:1-(4'-Bromo-3'-nitrophenyl)-2-morpholinoethanol Hydrochloride \$\$ 4-Morpholineethanol, .alpha.-(4-bromo-3-nitrophenyl)-, monohydrochloric

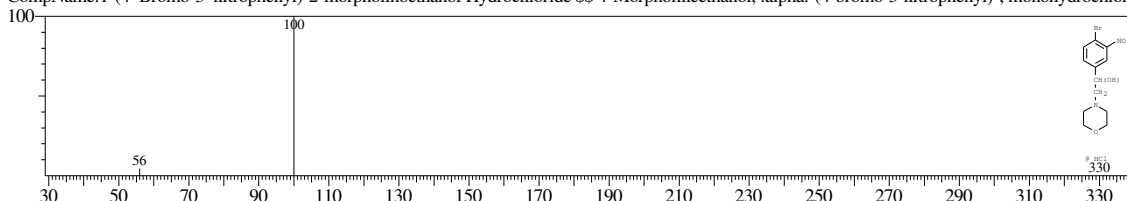

<< Target >>

Line#:19 R.Time:33.680(Scan#:3269) MassPeaks:14

RawMode:Averaged 33.670-33.690(3268-3270) BasePeak:58.05(3293)

BG Mode:Calc. from Peak Group 1 - Event 1

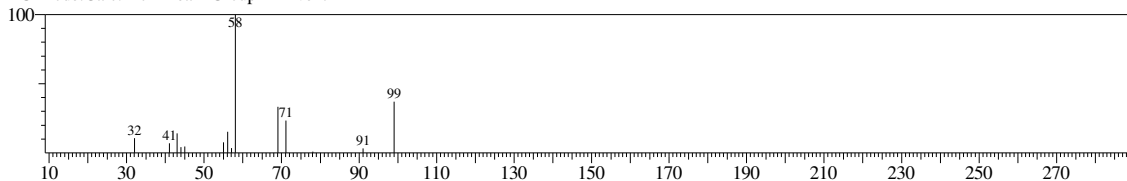

Hit#:1 Entry:194037 Library:WILEY7.LIB

SI:76 Formula:C19 H41 N CAS:3002-57-1 MolWeight:283 RetIndex:0

CompName:N,N-DIMETHYL-HEPTADECYLAMINE \$\$

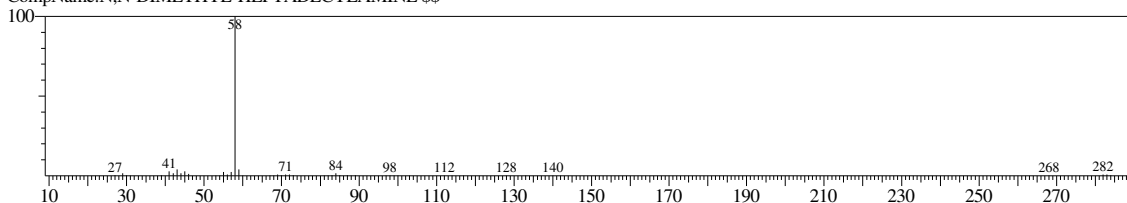

Hit#:2 Entry:129750 Library:WILEY7.LIB

SI:76 Formula:C15 H33 N CAS:17373-29-4 MolWeight:227 RetIndex:0

CompName:N,N-DIMETHYL-TRIDECYLAMINE \$\$

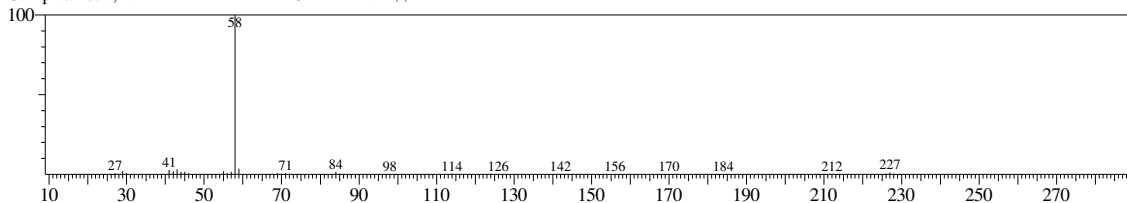

Hit#:3 Entry:263211 Library:WILEY7.LIB

SI:76 Formula:C19 H42 BR N CAS:57-09-0 MolWeight:363 RetIndex:0

CompName:1-Hexadecanaminium, N,N,N-trimethyl-, bromide \$ n-Hexadecyltrimethylammonium bromide

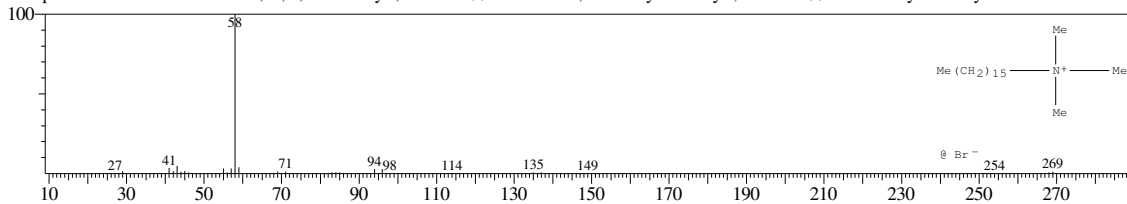

Hit#:4 Entry:4273 Library:WILEY7.LIB

SI:76 Formula:C4 H11 N O CAS:110-73-6 MolWeight:89 RetIndex:0

CompName:2-Ethylaminoethanol \$ Ethanol, 2-(ethylamino)- (CAS) Ethylethanolamine \$ (2-Hydroxyethyl)ethylamine \$ Ethyl-2-hydroxyethylamine

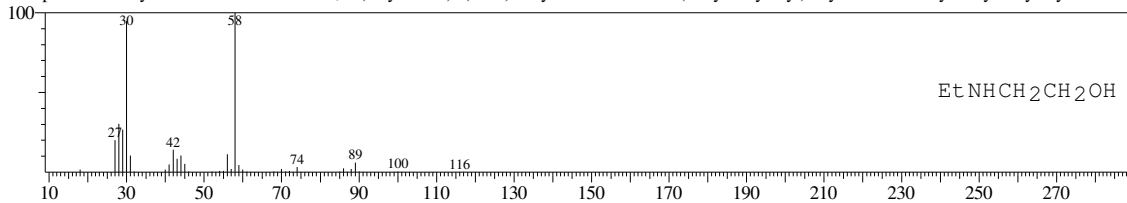

Hit#:5 Entry:208601 Library:WILEY7.LIB

SI:75 Formula:C20 H43 N CAS:124-28-7 MolWeight:297 RetIndex:0

CompName:1-Octadecanamine, N,N-dimethyl- (CAS) Dimethyloctadecylamine \$ Dimantine \$ Dymanthine \$ Armine DM18D \$ Armeen DM 18D

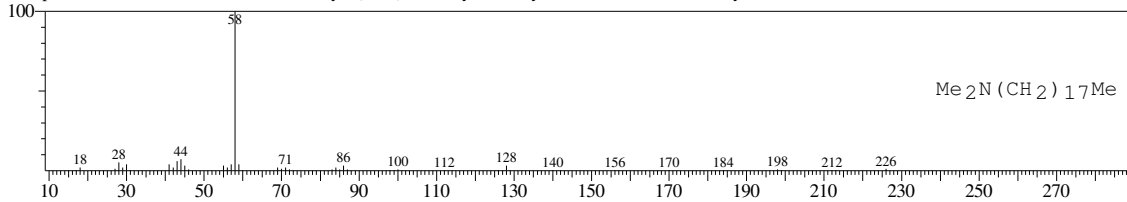

<< Target >>

Line#:20 R.Time:33.910(Scan#:3292) MassPeaks:19

RawMode:Averaged 33.900-33.920(3291-3293) BasePeak:74.05(9794)

BG Mode:Calc. from Peak Group 1 - Event 1

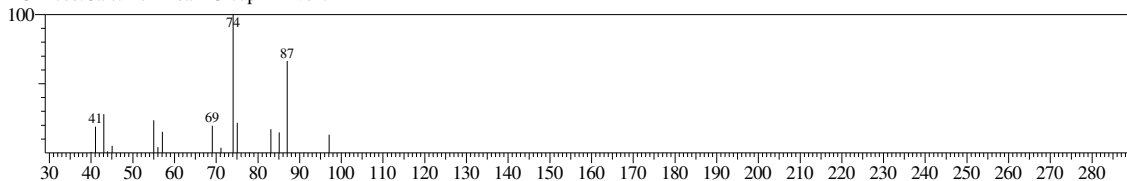

Hit#:1 Entry:78445 Library:WILEY7.LIB

SI:89 Formula:C11 H22 O2 CAS:5129-63-5 MolWeight:186 RetIndex:0

CompName:Nonanoic acid, 7-methyl-, methyl ester (CAS) METHYL 7-METHYLNONANOATE \$\$

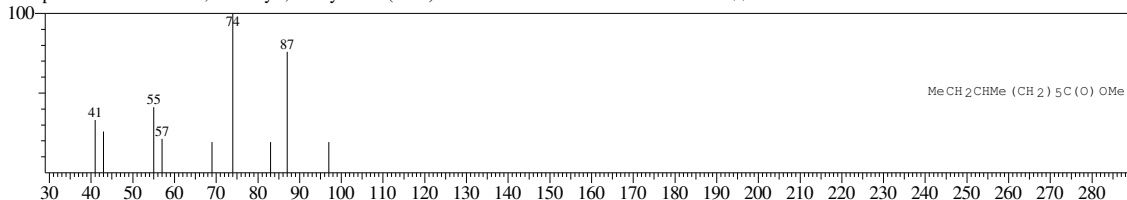

Hit#:2 Entry:209861 Library:WILEY7.LIB

SI:86 Formula:C19 H38 O2 CAS:112-61-8 MolWeight:298 RetIndex:0

CompName:Octadecanoic acid, methyl ester (CAS) Methyl stearate \$\$ Methyl octadecanoate \$\$ Methyl n-octadecanoate \$\$ Stearic acid methyl ester \$\$ Ke

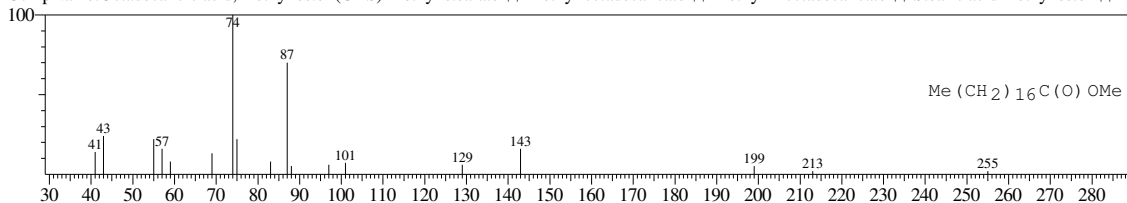

Hit#:3 Entry:195593 Library:WILEY7.LIB

SI:86 Formula:C18 H36 O2 CAS:1731-92-6 MolWeight:284 RetIndex:0

CompName:Heptadecanoic acid, methyl ester (CAS) Methyl heptadecanoate \$\$ Methyl margarate \$\$ Margaric acid methyl ester \$\$ n-Heptadecanoic acid n

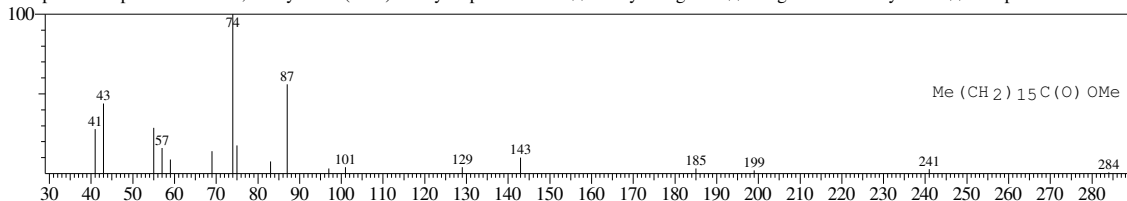

Hit#:4 Entry:95911 Library:WILEY7.LIB

SI:85 Formula:C12 H24 O2 CAS:1731-86-8 MolWeight:200 RetIndex:0

CompName:Undecanoic acid, methyl ester (CAS) Methyl undecanoate \$\$ Methyl ester of undecanoic acid \$\$ METHYL HENDECANOATE \$\$ Methyl un

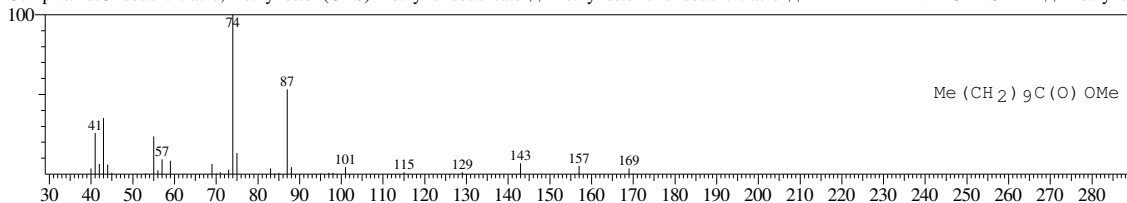

Hit#:5 Entry:180457 Library:WILEY7.LIB

SI:85 Formula:C17 H34 O2 CAS:112-39-0 MolWeight:270 RetIndex:0

CompName:Hexadecanoic acid, methyl ester (CAS) Methyl palmitate \$\$ Methyl hexadecanoate \$\$ Methyl n-hexadecanoate \$\$ Uniphath A60 \$\$ Metholene

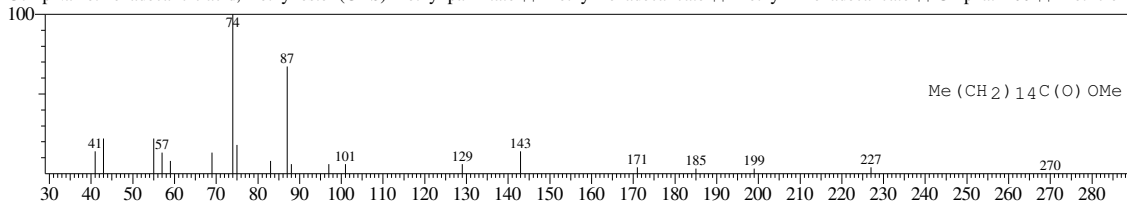

<< Target >>

Line#:21 R.Time:34.400(Scan#:3341) MassPeaks:11

RawMode:Averaged 34.390-34.410(3340-3342) BasePeak:71.10(1127)

BG Mode:Calc. from Peak Group 1 - Event 1

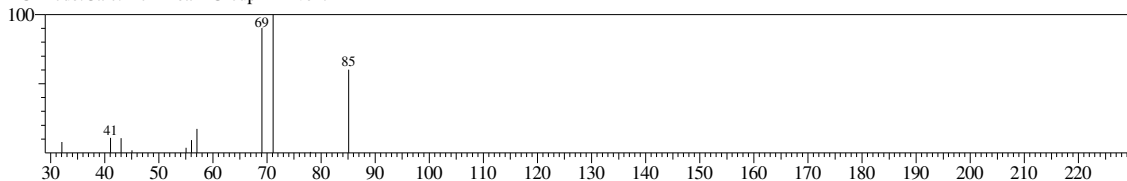

Hit#:1 Entry:37895 Library:WILEY7.LIB

SI:78 Formula:C10 H14 O CAS:104832-00-0 MolWeight:150 RetIndex:0

CompName:(+)-dehydrocamphor \$\$ Bicyclo[2.2.1]hept-5-en-2-one, 1,7,7-trimethyl-, (1S)- (CAS) (+)-5-Bornen-2-one \$\$ (+)-5,6-Dehydrocamphor \$\$

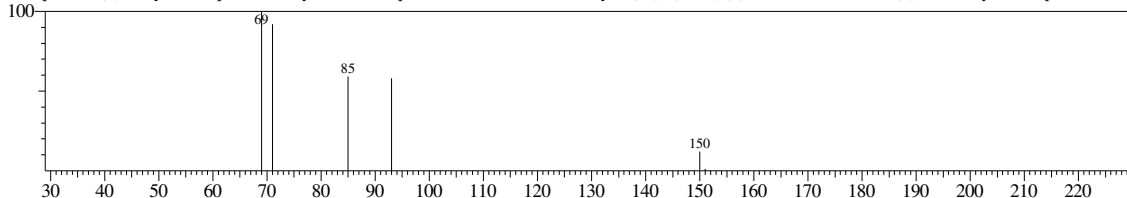

Hit#:2 Entry:37949 Library:WILEY7.LIB

SI:78 Formula:C10 H14 O CAS:0-00-0 MolWeight:150 RetIndex:0

CompName:(+)-5,6-Dehydrocamphor \$\$

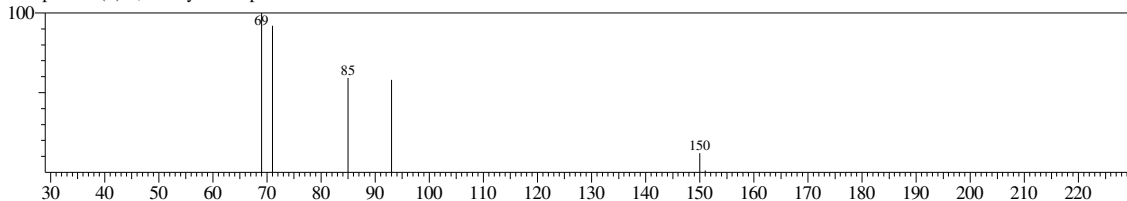

Hit#:3 Entry:123257 Library:WILEY7.LIB

SI:76 Formula:C15 H26 O CAS:0-00-0 MolWeight:222 RetIndex:0

CompName:7-hydroxy-6,7-dihydro-5,6E-dehydronerolidol \$\$

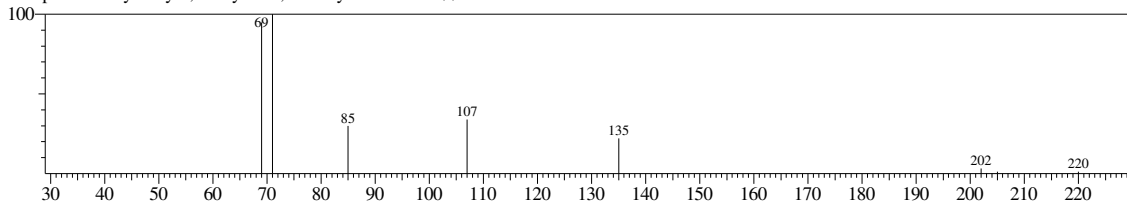

Hit#:4 Entry:150100 Library:WILEY7.LIB

SI:74 Formula:C15 H32 O2 CAS:0-00-0 MolWeight:244 RetIndex:0

CompName:1-(2-Hydroxyethoxy)tridecane \$\$

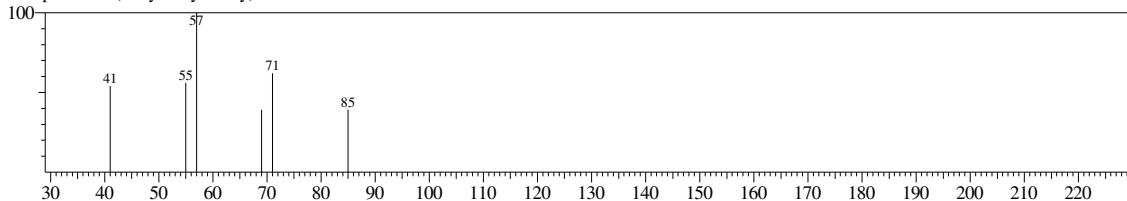

Hit#:5 Entry:47102 Library:WILEY7.LIB

SI:74 Formula:C8 H14 O3 CAS:104863-17-4 MolWeight:158 RetIndex:0

CompName:4-formylmethyl-2-propyl-1,3-dioxolane \$\$

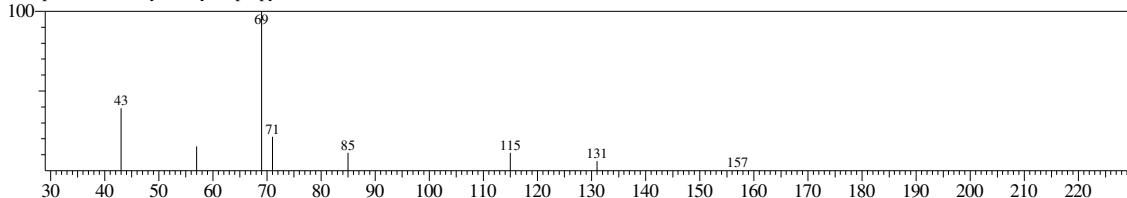

<< Target >>

Line#:22 R.Time:35.010(Scan#:3402) MassPeaks:14

RawMode:Averaged 35.000-35.020(3401-3403) BasePeak:85.10(1549)

BG Mode:Calc. from Peak Group 1 - Event 1

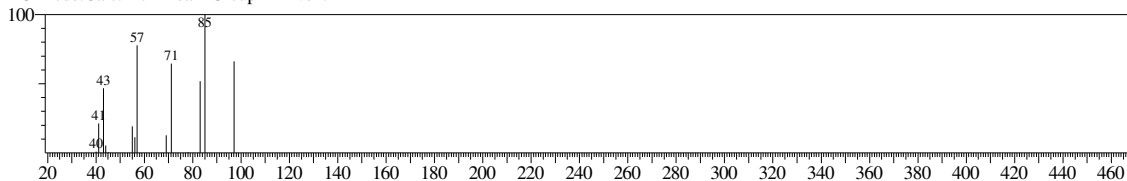

Hit#:1 Entry:257378 Library:WILEY7.LIB

SI:84 Formula:C<sub>24</sub>H<sub>50</sub>O CAS:4542-57-8 MolWeight:354 RetIndex:0

CompName:Dodecane, 1,1'-oxybis- (CAS) DIDODECANE ETHER \$\$ DI-N-DODECYL ETHER \$\$ Dodecyl ether \$\$ Dilauryl ether \$\$ Didodecyl ether \$

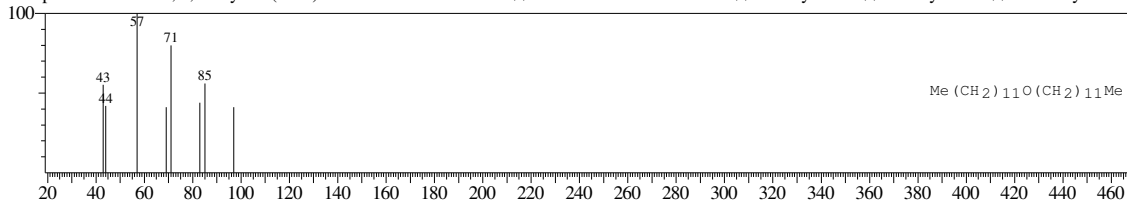

Hit#:2 Entry:64586 Library:WILEY7.LIB

SI:81 Formula:C<sub>10</sub>H<sub>22</sub>O<sub>2</sub> CAS:122305-34-4 MolWeight:174 RetIndex:0

CompName:(meso)-3,4-dihydroxymethyl-3,4-dimethylhexane \$\$ 1,4-Butanediol, 2,3-diethyl-2,3-dimethyl-, (R\*,R\*)-(+,-)- (CAS)

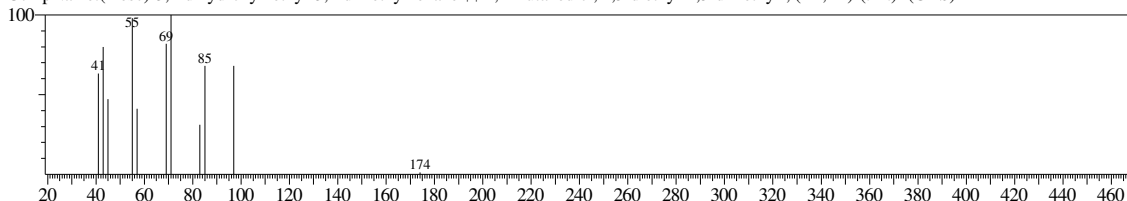

Hit#:3 Entry:261545 Library:WILEY7.LIB

SI:81 Formula:C<sub>16</sub>H<sub>19</sub>N<sub>5</sub>O<sub>5</sub> CAS:130138-26-0 MolWeight:361 RetIndex:0

CompName:3',4'-dihydro-2'-(morpholin-4-yl)-5',7'-dinitrospiro[cyclopentane-1,3'-quinazoline] \$\$ Spiro[cyclopentane-1,2'(1'H)-quinoxaline], 3'-(4-morpho

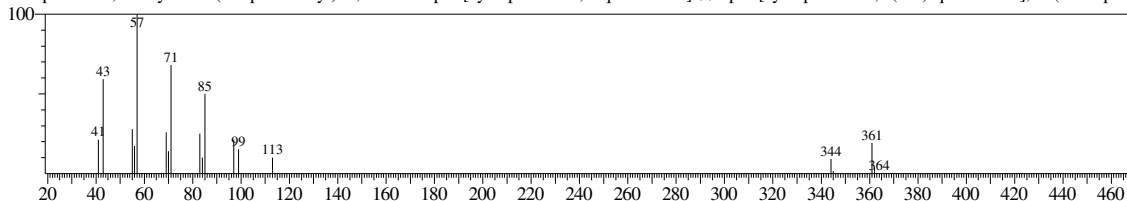

Hit#:4 Entry:306775 Library:WILEY7.LIB

SI:81 Formula:C<sub>27</sub>H<sub>55</sub>Br CAS:55590-34-6 MolWeight:458 RetIndex:0

CompName:1-Bromo-8-methylhexacosane \$\$ 2,10-Dimethyloctacosanoic acid \$\$

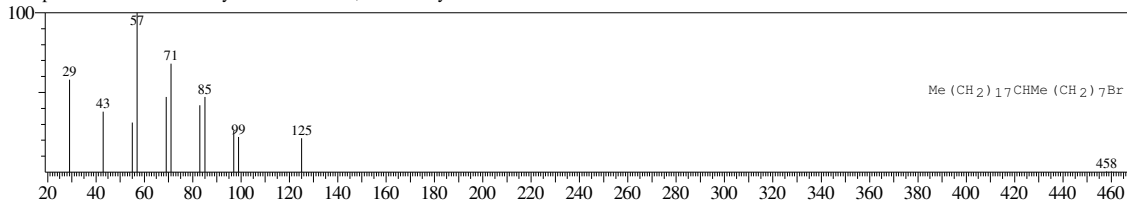

Hit#:5 Entry:245565 Library:WILEY7.LIB

SI:80 Formula:C<sub>24</sub>H<sub>50</sub> CAS:1928-30-9 MolWeight:338 RetIndex:0

CompName:Tricosane, 2-methyl- (CAS) 2-Methyltricosane \$\$

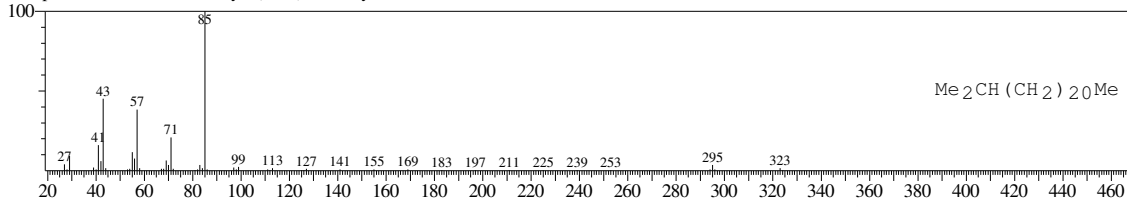

<< Target >>

Line#:23 R.Time:35.590(Scan#:3460) MassPeaks:21

RawMode:Averaged 35.580-35.600(3459-3461) BasePeak:73.05(2648)

BG Mode:Calc. from Peak Group 1 - Event 1

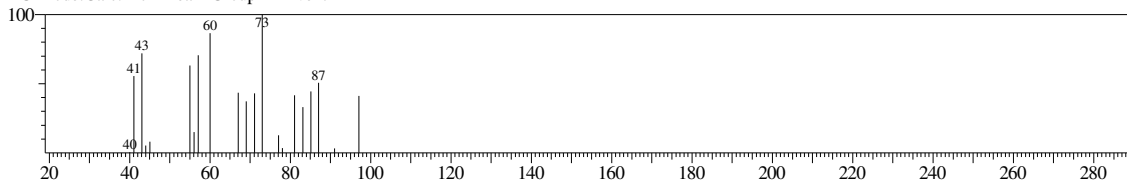

Hit#:1 Entry:164469 Library:WILEY7.LIB

SI:81 Formula:C16 H32 O2 CAS:57-10-3 MolWeight:256 RetIndex:0

CompName:Hexadecanoic acid (CAS) Palmitic acid \$\$ Palmitinic acid \$\$ n-Hexadecoic acid \$\$ n-Hexadecanoic acid \$\$ Pentadecanecarboxylic acid \$\$ 1-

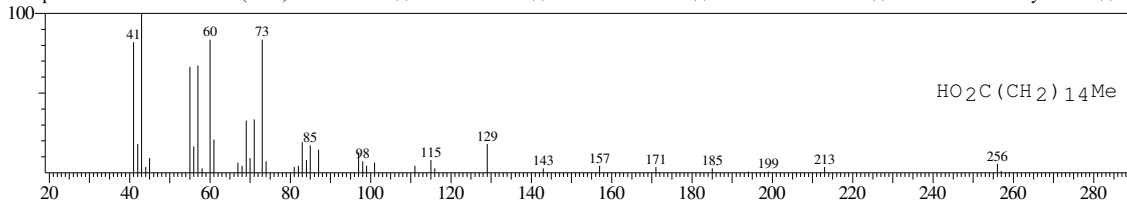

Hit#:2 Entry:164462 Library:WILEY7.LIB

SI:79 Formula:C16 H32 O2 CAS:57-10-3 MolWeight:256 RetIndex:0

CompName:Hexadecanoic acid (CAS) Palmitic acid \$\$ Palmitinic acid \$\$ n-Hexadecoic acid \$\$ n-Hexadecanoic acid \$\$ Pentadecanecarboxylic acid \$\$ 1-

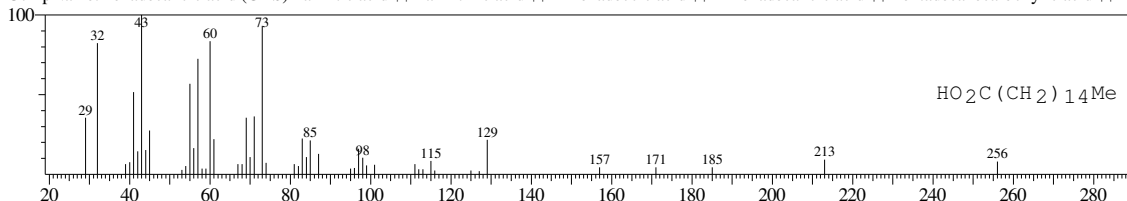

Hit#:3 Entry:63223 Library:WILEY7.LIB

SI:79 Formula:C10 H20 O2 CAS:334-48-5 MolWeight:172 RetIndex:0

CompName:Decanoic acid (CAS) Capric acid \$\$ Decoic acid \$\$ Decylic acid \$\$ Caprynic acid \$\$ Caprinic acid \$\$ n-Decoic acid \$\$ n-Capric acid \$\$ n-De

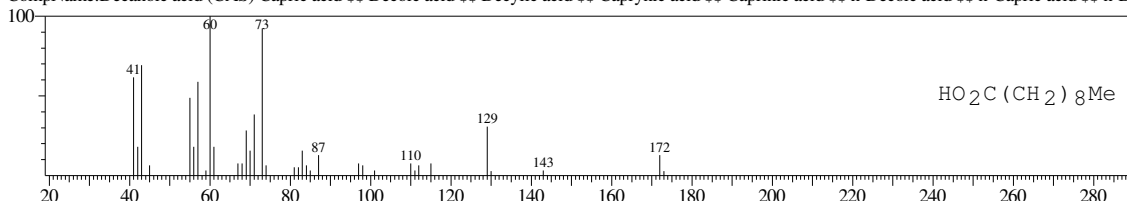

Hit#:4 Entry:180843 Library:WILEY7.LIB

SI:79 Formula:C15 H29 N O3 CAS:97-78-9 MolWeight:271 RetIndex:0

CompName:Glycine, N-methyl-N-(1-oxododecyl)- \$\$ Sarcosine, N-lauroyl- \$\$ Hamposyl I \$\$ Lauroyl sarcosine \$\$ Lauroylsarcosine \$\$ Maprosyl I \$\$ N-I

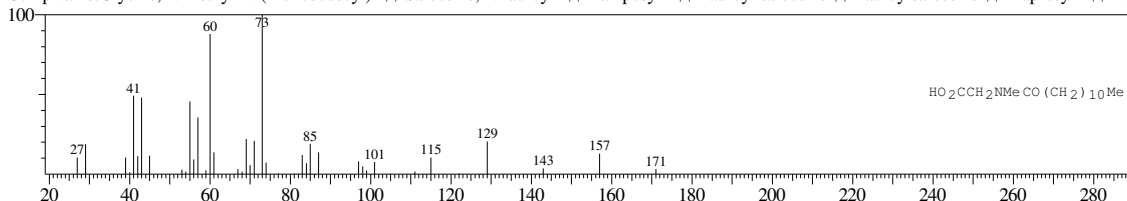

Hit#:5 Entry:195573 Library:WILEY7.LIB

SI:79 Formula:C18 H36 O2 CAS:57-11-4 MolWeight:284 RetIndex:0

CompName:Octadecanoic acid (CAS) Stearic acid \$\$ n-Octadecanoic acid \$\$ PD 185 \$\$ NAA 173 \$\$ Vanicol \$\$ Kam 3000 \$\$ Kam 1000 \$\$ Kam 2000 \$\$

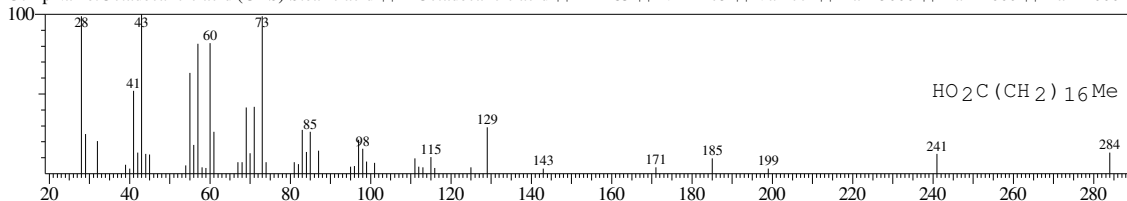

<< Target >>

Line#:24 R.Time:35.920(Scan#:3493) MassPeaks:12

RawMode:Averaged 35.910-35.930(3492-3494) BasePeak:44.00(203)

BG Mode:Calc. from Peak Group 1 - Event 1

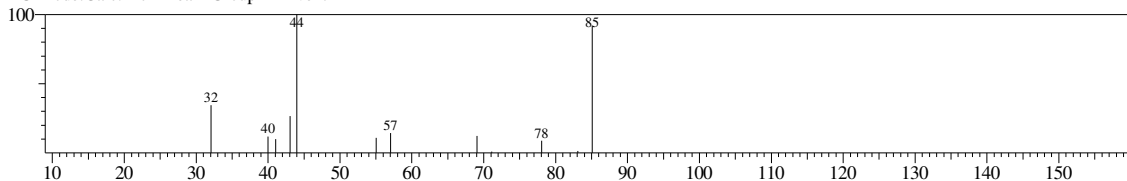

Hit#:1 Entry:19551 Library:WILEY7.LIB

SI:77 Formula:C5 H8 N2 O2 CAS:0-00-0 MolWeight:128 RetIndex:0

CompName:3-METHYLDIOXOPIPERAZINE \$\$

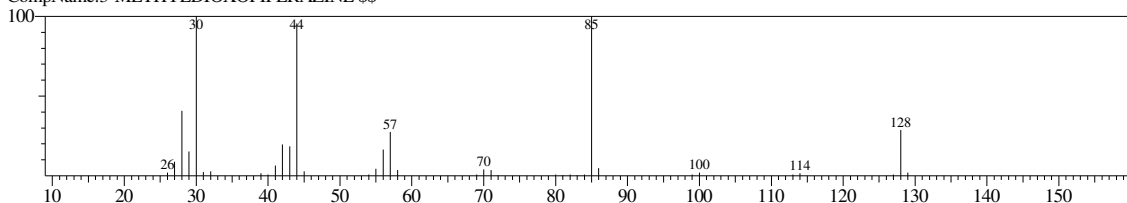

Hit#:2 Entry:1866 Library:WILEY7.LIB

SI:74 Formula:C2 H5 N O2 CAS:598-55-0 MolWeight:75 RetIndex:0

CompName:Carbamic acid, methyl ester (CAS) Methyl carbamate \$\$ Urethylane \$\$ Methylurethane \$\$ Carbamic acid methyl ester \$\$ Methylurethan \$\$ N

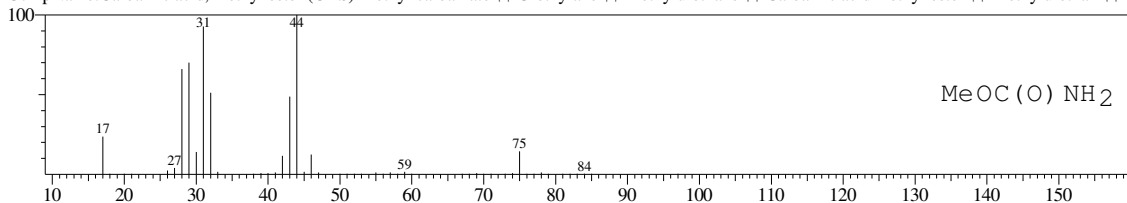

Hit#:3 Entry:3322 Library:WILEY7.LIB

SI:74 Formula:C4 H10 N2 CAS:110-85-0 MolWeight:86 RetIndex:0

CompName:Piperazine (CAS) R22 \$\$ Uvilon \$\$ Antiren \$\$ Pipersol \$\$ Lumbrical \$\$ Worm-A-Ton \$\$ Dispermine \$\$ Wurmrazin \$\$ Piperazidine \$\$ Era

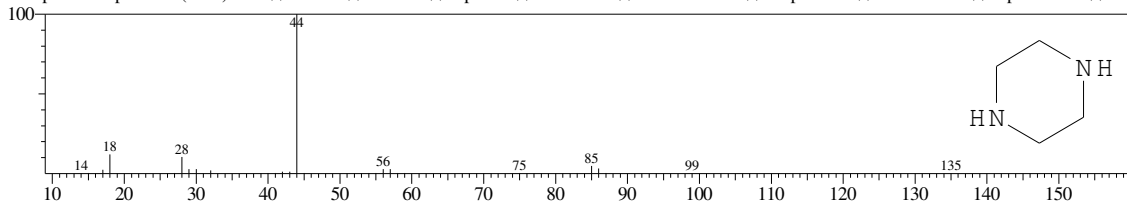

Hit#:4 Entry:20996 Library:WILEY7.LIB

SI:73 Formula:C8 H19 N CAS:693-16-3 MolWeight:129 RetIndex:0

CompName:2-Octanamine (CAS) 2-Octylamine \$\$ 1-Methylheptylamine \$\$ 2-Aminooctane \$\$ Heptylamine, 1-methyl- \$\$ sec-Octylamine \$\$ Caprylamin

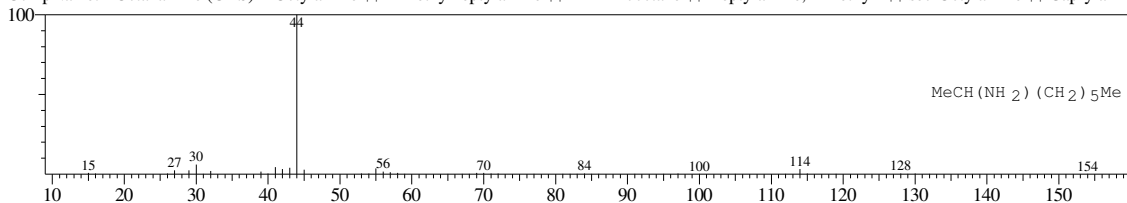

Hit#:5 Entry:3319 Library:WILEY7.LIB

SI:72 Formula:C4 H10 N2 CAS:110-85-0 MolWeight:86 RetIndex:0

CompName:Piperazine (CAS) R22 \$\$ Uvilon \$\$ Antiren \$\$ Pipersol \$\$ Lumbrical \$\$ Worm-A-Ton \$\$ Dispermine \$\$ Wurmrazin \$\$ Piperazidine \$\$ Era

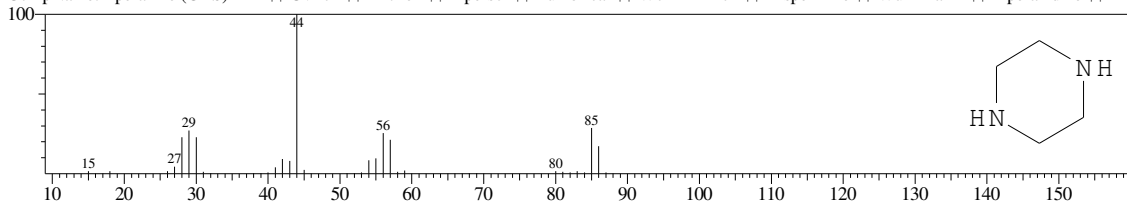

<< Target >>

Line#:25 R.Time:36.300(Scan#:3531) MassPeaks:24

RawMode:Averaged 36.290-36.310(3530-3532) BasePeak:45.05(2009)

BG Mode:Calc. from Peak Group 1 - Event 1

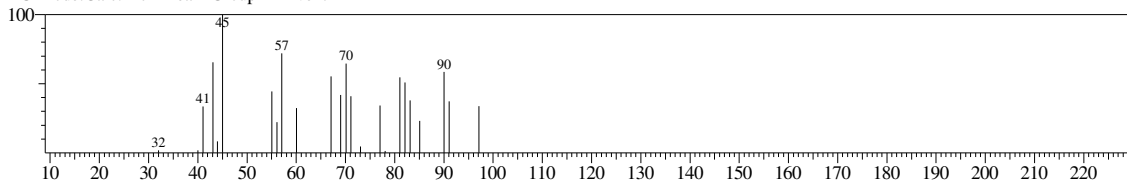

Hit#:1 Entry:297636 Library:WILEY7.LIB

SI:74 Formula:C25 H34 O4 S CAS:125536-90-5 MolWeight:430 RetIndex:0

CompName:2,3,6,7-tetramethyl-10-(4-methylphenylsulfonyloxy)-1,4,4.alpha.,5,8,8a.beta.,9.beta.,9a.beta.,10.alpha.,10a.alpha.-decahydroanthracen-9-ol \$\$\$

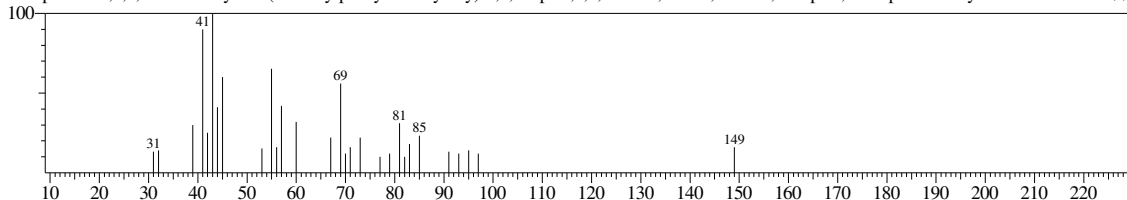

Hit#:2 Entry:64582 Library:WILEY7.LIB

SI:72 Formula:C10 H22 O2 CAS:1559-35-9 MolWeight:174 RetIndex:0

CompName:Ethanol, 2-[(2-ethylhexyl)oxy]- (CAS) 2-(2-Ethylhexyloxy)ethanol \$\$\$

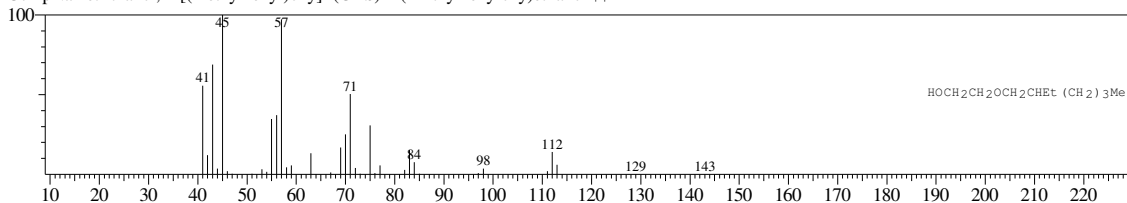

Hit#:3 Entry:63474 Library:WILEY7.LIB

SI:71 Formula:C11 H24 O CAS:103-08-2 MolWeight:172 RetIndex:0

CompName:2-Nonanol, 5-ethyl- (CAS) 5-Ethyl-2-nonanol \$\$\$ (3-Ethyl-n-heptyl)methylcarbinol \$\$\$

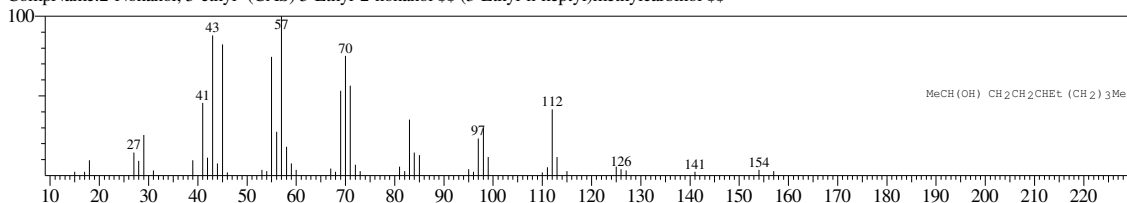

Hit#:4 Entry:63458 Library:WILEY7.LIB

SI:71 Formula:C11 H24 O CAS:1653-30-1 MolWeight:172 RetIndex:0

CompName:2-Undecanol (CAS) sec-Undecyl alcohol \$\$\$ Methyl nonyl carbinol \$\$\$ undecan-2-ol \$\$\$ (+)-2-Undecanol \$\$\$ 2-Hydroxyundecane \$\$\$

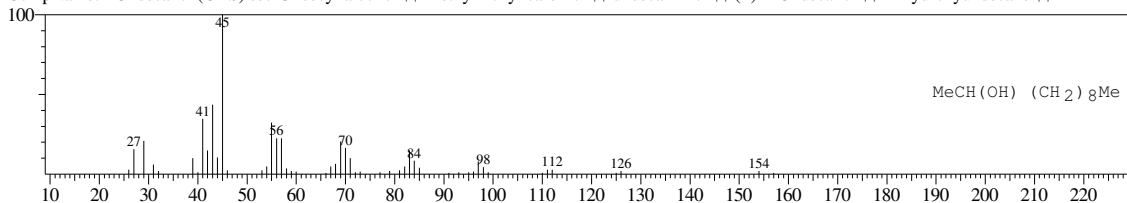

Hit#:5 Entry:164204 Library:WILEY7.LIB

SI:71 Formula:C17 H36 O CAS:56196-09-9 MolWeight:256 RetIndex:0

CompName:Pentadecane, 1-methoxy-13-methyl- (CAS) 13-METHYL,1-PENTADECANOL METHYL ETHER \$\$\$

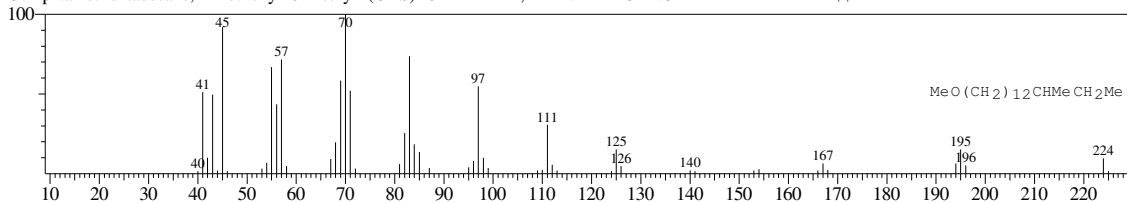

<< Target >>

Line#:26 R.Time:36.450(Scan#:3546) MassPeaks:10

RawMode:Averaged 36.440-36.460(3545-3547) BasePeak:81.05(1020)

BG Mode:Calc. from Peak Group 1 - Event 1

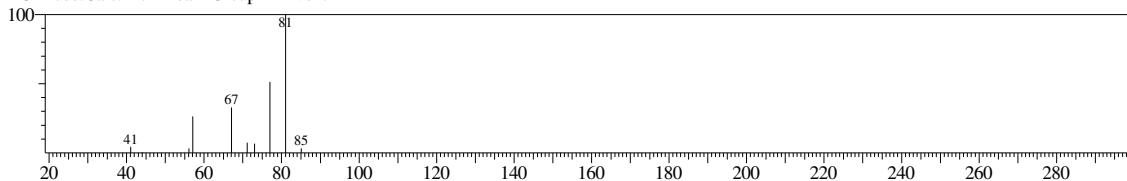

Hit#:1 Entry:41114 Library:WILEY7.LIB

SI:71 Formula:C10H16O CAS:89-82-7 MolWeight:152 RetIndex:0

CompName:Pulegone \$\$ Cyclohexanone, 5-methyl-2-(1-methylethylidene)-, (R)- (CAS) (+)-Pulegone \$\$ (+)-(R)-Pulegone \$\$ (R)-(+)-Pulegone \$\$ p-Ment

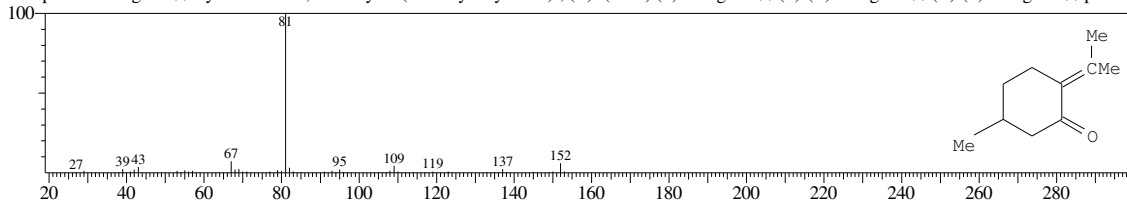

Hit#:2 Entry:41147 Library:WILEY7.LIB

SI:71 Formula:C10H16O CAS:546-80-5 MolWeight:152 RetIndex:0

CompName:.alpha.-Thujone \$\$ Bicyclo[3.1.0]hexan-3-one, 4-methyl-1-(1-methylethyl)-, [1S-(1.alpha.,4.alpha.,5.alpha.)]- (CAS) Thujon \$\$ Thujone - \$\$ (-

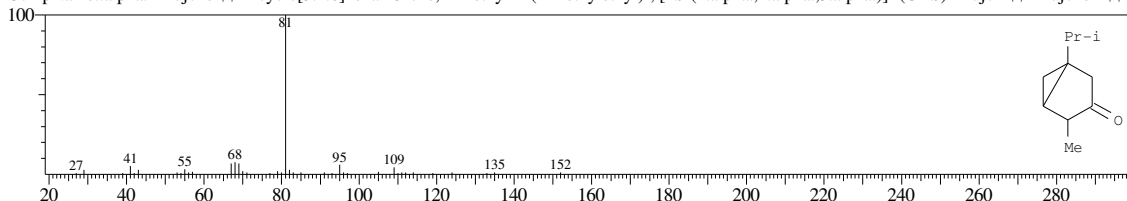

Hit#:3 Entry:273246 Library:WILEY7.LIB

SI:70 Formula:C13H14Cl2N2O7 CAS:0-00-0 MolWeight:380 RetIndex:0

CompName:2'-DEOXYURIDINE, 3',5'-DI-O-CHLORACETYL- \$\$

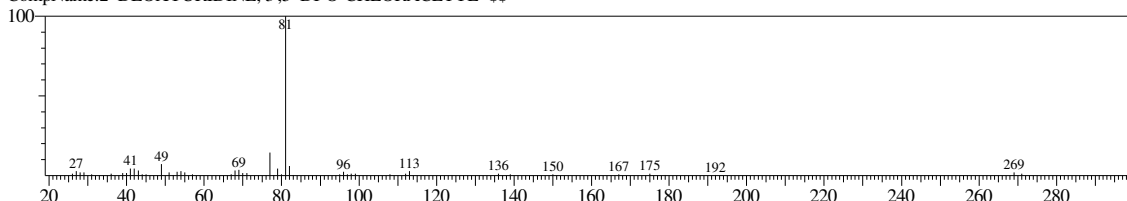

Hit#:4 Entry:205496 Library:WILEY7.LIB

SI:69 Formula:C19H34O2 CAS:0-00-0 MolWeight:294 RetIndex:0

CompName:methyl octadeca-13,14-dienoate \$\$

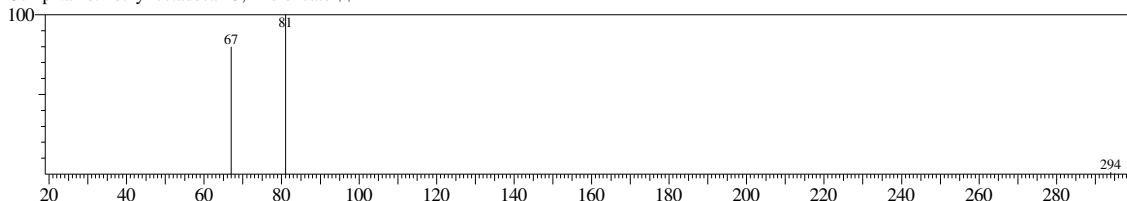

Hit#:5 Entry:41007 Library:WILEY7.LIB

SI:69 Formula:C10H16O CAS:3777-70-6 MolWeight:152 RetIndex:0

CompName:2-HEXYL FURAN \$\$ Furan, 2-hexyl- (CAS) 2-Hexylfuran \$\$

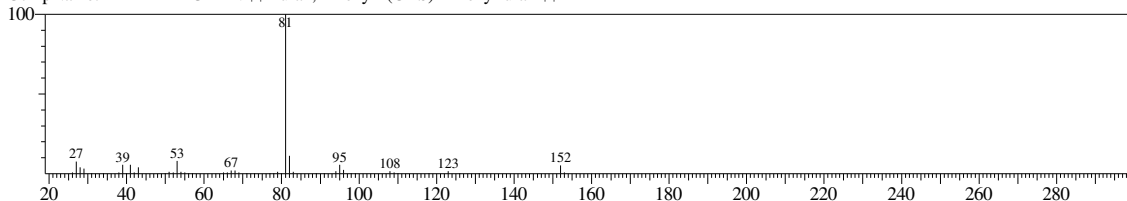

<< Target >>

Line#:27 R.Time:36.780(Scan#:3579) MassPeaks:13

RawMode:Averaged 36.770-36.790(3578-3580) BasePeak:81.05(1049)

BG Mode:Calc. from Peak Group 1 - Event 1

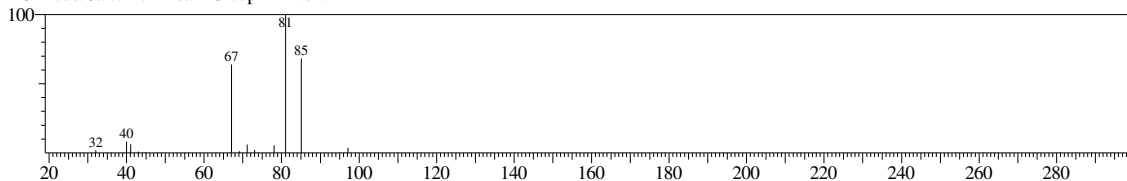

Hit#:1 Entry:18255 Library:WILEY7.LIB

SI:80 Formula:C7 H10 O2 CAS:0-00-0 MolWeight:126 RetIndex:0

CompName:1,6-Dioxaspiro[4.4]non-3-ene \$\$

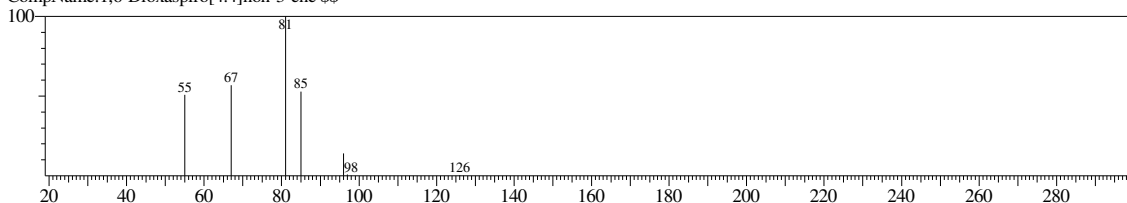

Hit#:2 Entry:205496 Library:WILEY7.LIB

SI:75 Formula:C19 H34 O2 CAS:0-00-0 MolWeight:294 RetIndex:0

CompName:methyl octadeca-13,14-dienoate \$\$

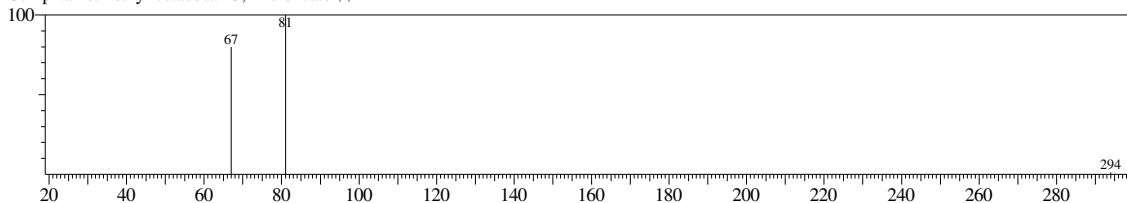

Hit#:3 Entry:137059 Library:WILEY7.LIB

SI:69 Formula:C9 H15 BR O2 CAS:0-00-0 MolWeight:234 RetIndex:0

CompName:Ethyl (Z)-7-bromohept-5-enoate \$\$

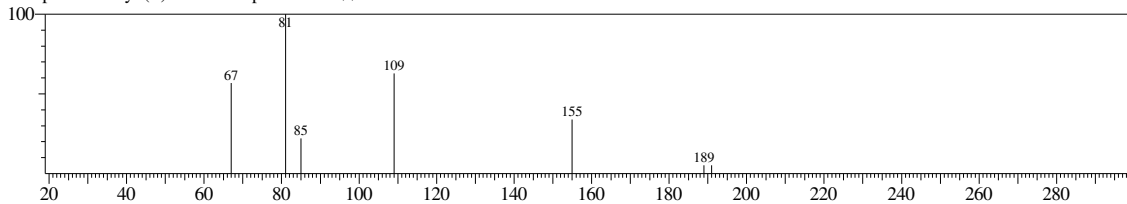

Hit#:4 Entry:36270 Library:WILEY7.LIB

SI:69 Formula:C3 H4 CL F3 O CAS:425-87-6 MolWeight:148 RetIndex:0

CompName:Ethane, 2-chloro-1,1,2-trifluoro-1-methoxy- (CAS) 2-Chloro-1,1,2-trifluoroethyl methyl ether \$\$ Ether, 2-chloro-1,1,2-trifluoroethyl methyl \$\$

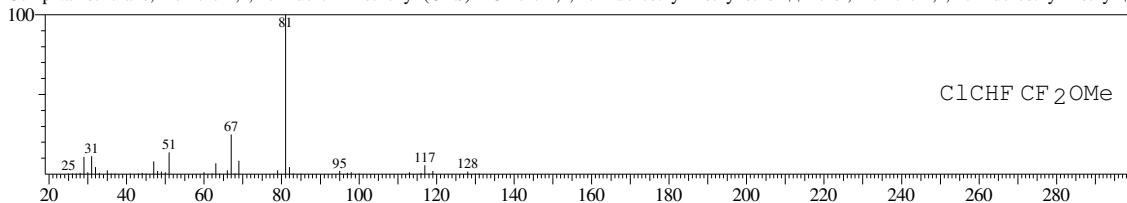

Hit#:5 Entry:41147 Library:WILEY7.LIB

SI:69 Formula:C10 H16 O CAS:546-80-5 MolWeight:152 RetIndex:0

CompName:..alpha.-Thujone \$\$ Bicyclo[3.1.0]hexan-3-one, 4-methyl-1-(1-methylethyl)-, [1S-(1.alpha.,4.alpha.,5.alpha.)]- (CAS) Thujon \$\$ Thujone - \$\$ (-

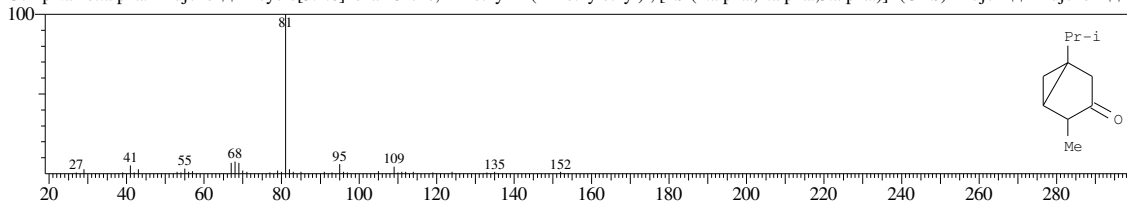

<< Target >>

Line#:28 R.Time:37.200(Scan#:3621) MassPeaks:17

RawMode:Averaged 37.190-37.210(3620-3622) BasePeak:57.05(1786)

BG Mode:Calc. from Peak Group 1 - Event 1

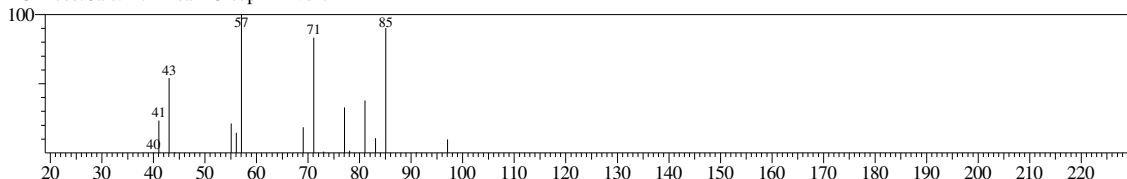

Hit#:1 Entry:221432 Library:WILEY7.LIB

SI:82 Formula:C22 H46 CAS:629-97-0 MolWeight:310 RetIndex:0

CompName:Docosane (CAS) n-Docosane \$\$ C22H46 STANDARD \$\$ Normal-docosane \$\$

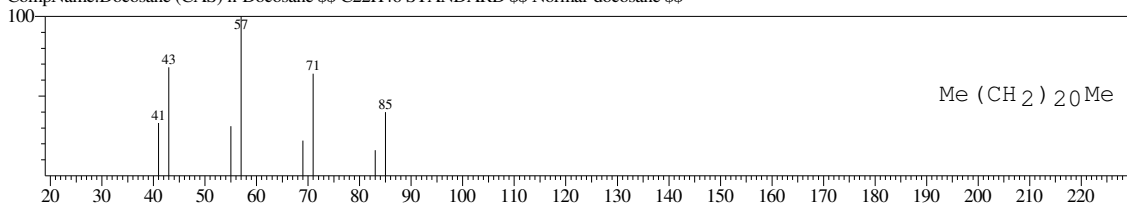

Hit#:2 Entry:46273 Library:WILEY7.LIB

SI:82 Formula:C11 H24 CAS:17302-32-8 MolWeight:156 RetIndex:0

CompName:Nonane, 3,7-dimethyl- (CAS) 3,7-Dimethylnonane \$\$

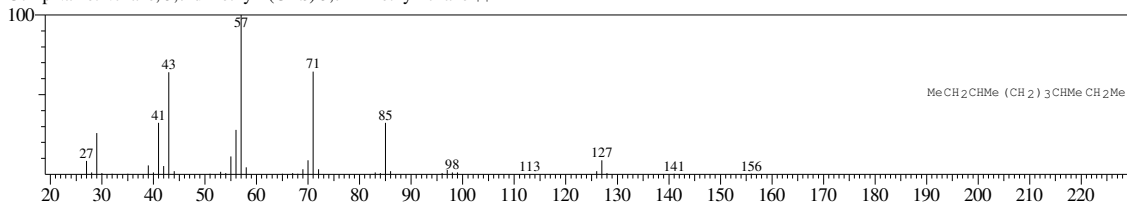

Hit#:3 Entry:128619 Library:WILEY7.LIB

SI:82 Formula:C14 H31 B O CAS:0-00-0 MolWeight:226 RetIndex:0

CompName:DIETHYL(DECYLOXY)-BORANE \$\$

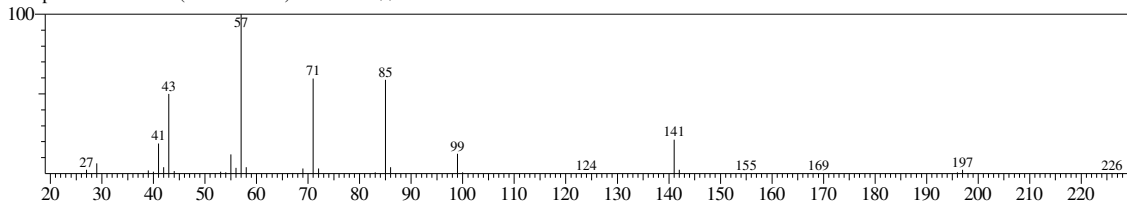

Hit#:4 Entry:76454 Library:WILEY7.LIB

SI:82 Formula:C13 H28 CAS:62185-53-9 MolWeight:184 RetIndex:0

CompName:Nonane, 5-(2-methylpropyl)- (CAS) OCTANE, 4-BUTYL-2-METHYL- \$\$

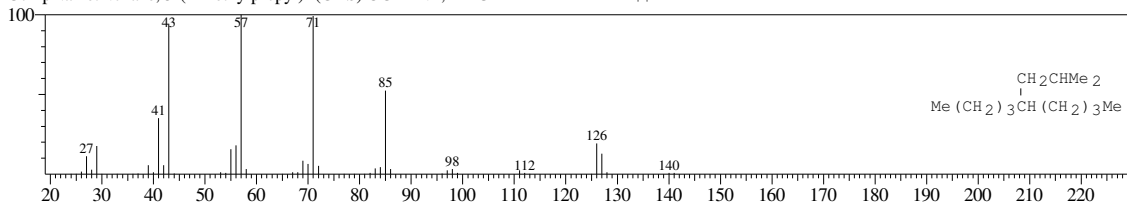

Hit#:5 Entry:207748 Library:WILEY7.LIB

SI:81 Formula:C12 H25 I CAS:4292-19-7 MolWeight:296 RetIndex:0

CompName:Dodecane, 1-iodo- (CAS) n-Dodecyl iodide \$\$ Dodecyl iodide \$\$ Lauryl iodide \$\$ 1-Iodododecane \$\$ DODECAN, 1-JODO- \$\$

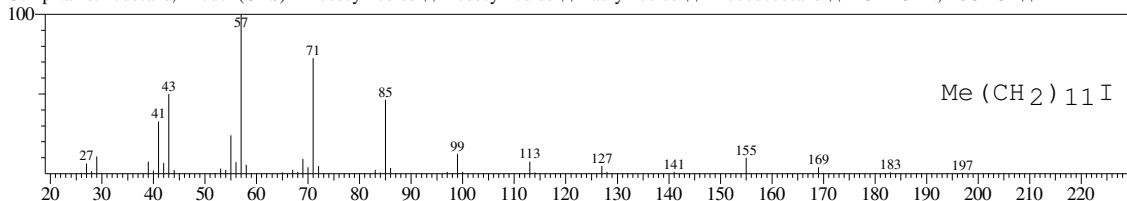

<< Target >>

Line#:29 R.Time:37.760(Scan#:3677) MassPeaks:12

RawMode:Averaged 37.750-37.770(3676-3678) BasePeak:95.05(669)

BG Mode:Calc. from Peak Group 1 - Event 1

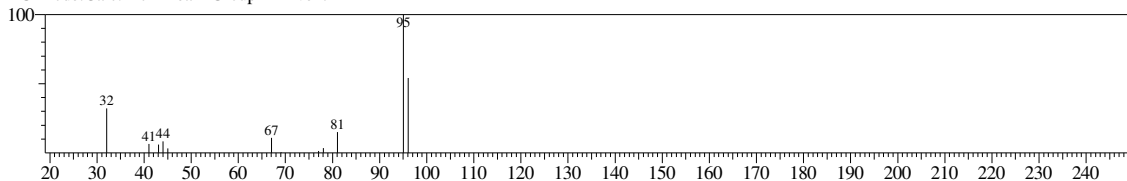

Hit#:1 Entry:10221 Library:WILEY7.LIB

SI:75 Formula:C7 H10 O CAS:1703-52-2 MolWeight:110 RetIndex:0

CompName:2-ETHYL-5-METHYLFURAN \$\$

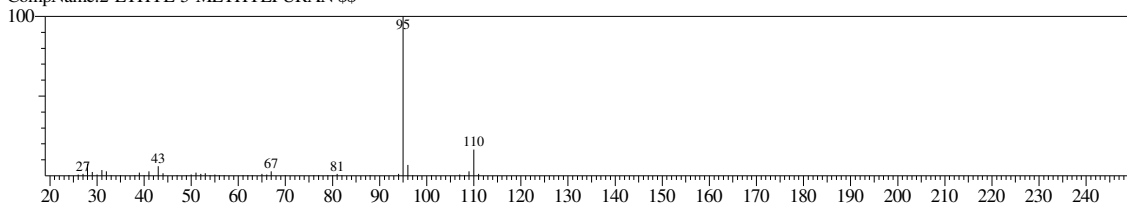

Hit#:2 Entry:84550 Library:WILEY7.LIB

SI:74 Formula:C11 H12 O3 CAS:0-00-0 MolWeight:192 RetIndex:0

CompName:Difurfurlyc-5-methyl ether \$\$

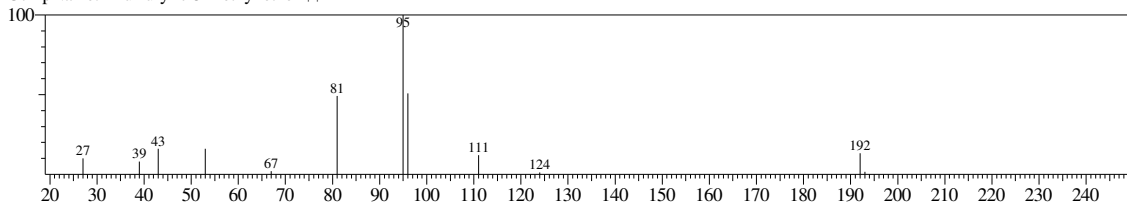

Hit#:3 Entry:147081 Library:WILEY7.LIB

SI:73 Formula:C9 H13 Cl3 O CAS:103659-46-7 MolWeight:242 RetIndex:0

CompName:6-(2,2,2-trichloro-1-hydroxyethyl)-1-methylcyclohex-1-ene \$\$ 2-Cyclohexene-1-methanol, 2-methyl-.alpha.-(trichloromethyl)- (CAS)

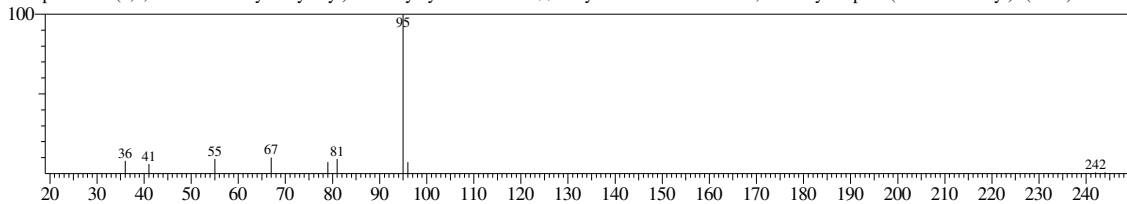

Hit#:4 Entry:279964 Library:WILEY7.LIB

SI:73 Formula:C14 H22 Hg CAS:0-00-0 MolWeight:392 RetIndex:0

CompName:Bis(1-norbornyl)mercury \$\$

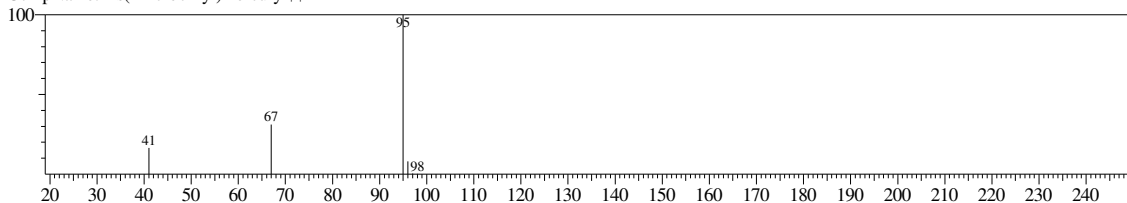

Hit#:5 Entry:88439 Library:WILEY7.LIB

SI:72 Formula:C13 H22 O CAS:60714-25-2 MolWeight:194 RetIndex:0

CompName:4-METHYL-4-(2',3'-DIMETHYL-CYCLOPENT-2'-EN-1'-YL)-PENTANAL \$\$ 2-Cyclopentene-1-butanal, .gamma.,.gamma.,2,3-tetramethyl-

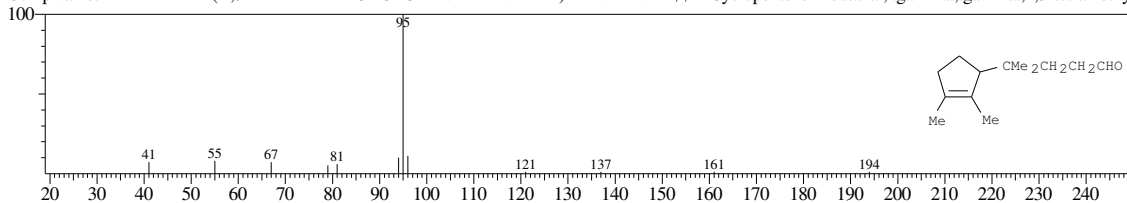

<< Target >>

Line#:30 R.Time:38.040(Scan#:3705) MassPeaks:17

RawMode:Averaged 38.030-38.050(3704-3706) BasePeak:67.05(794)

BG Mode:Calc. from Peak Group 1 - Event 1

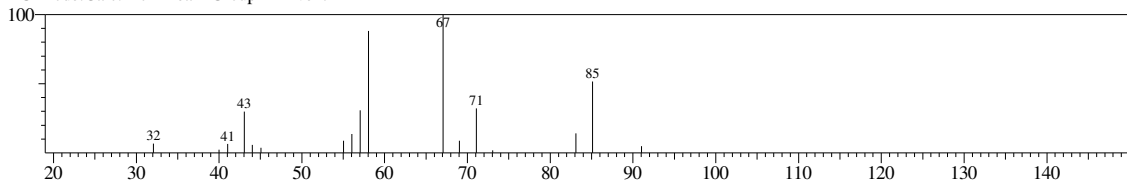

Hit#:1 Entry:12600 Library:WILEY7.LIB

SI:75 Formula:C7 H14 O CAS:32749-94-3 MolWeight:114 RetIndex:0

CompName:Pentanal, 2,3-dimethyl- (CAS) 2,3-Dimethylpentanal \$\$ 2,3-Dimethylvaleraldehyde \$\$ Valeraldehyde, 2,3-dimethyl- \$\$ 2,3-Dimethylpental

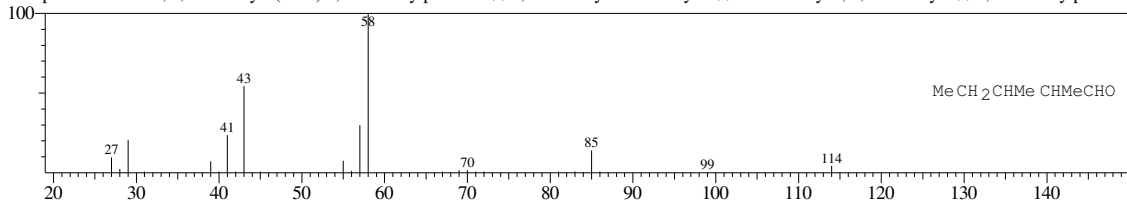

Hit#:2 Entry:12601 Library:WILEY7.LIB

SI:74 Formula:C7 H14 O CAS:32749-94-3 MolWeight:114 RetIndex:0

CompName:Pentanal, 2,3-dimethyl- (CAS) 2,3-Dimethylpentanal \$\$ 2,3-Dimethylvaleraldehyde \$\$ Valeraldehyde, 2,3-dimethyl- \$\$ 2,3-Dimethylpental

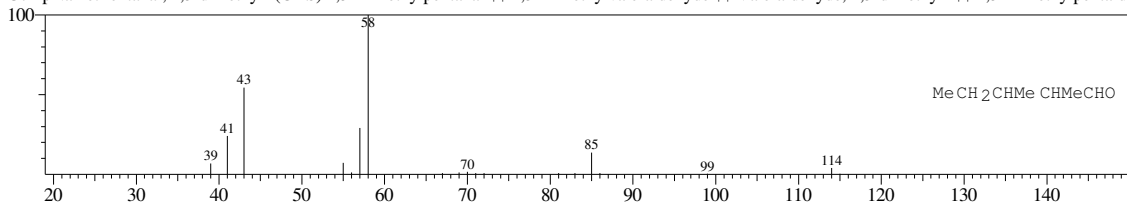

Hit#:3 Entry:31722 Library:WILEY7.LIB

SI:74 Formula:C9 H18 O CAS:108-83-8 MolWeight:142 RetIndex:0

CompName:4-Heptanone, 2,6-dimethyl- (CAS) 2,6-Dimethyl-4-heptanone \$\$ DIBK \$\$ DIBC \$\$ Isovalerone \$\$ Isobutyl ketone \$\$ Diisobutyl ketone \$\$ s-

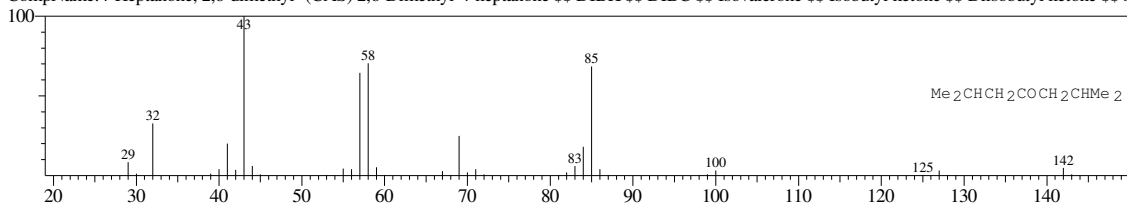

Hit#:4 Entry:60659 Library:WILEY7.LIB

SI:73 Formula:C11 H22 O CAS:0-00-0 MolWeight:170 RetIndex:0

CompName:2,3,7-TRIMETHYLOCTANAL \$\$

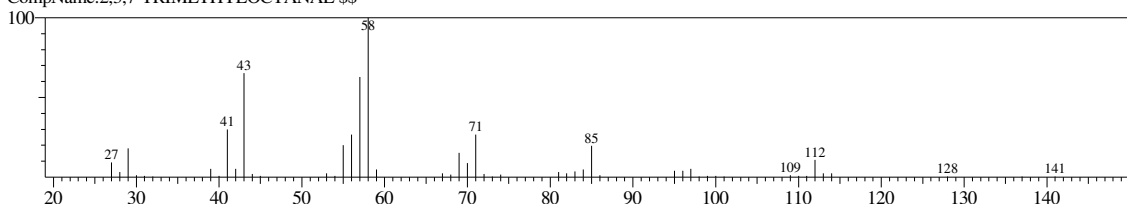

Hit#:5 Entry:77002 Library:WILEY7.LIB

SI:73 Formula:C12 H24 O CAS:110-41-8 MolWeight:184 RetIndex:0

CompName:Undecanal, 2-methyl- (CAS) 2-Methylundecanal \$\$ Aldehyde M.N.A. \$\$ 2-Methyl-1-undecanal \$\$ Methylonylactaldehyde \$\$ Methyl n-nor

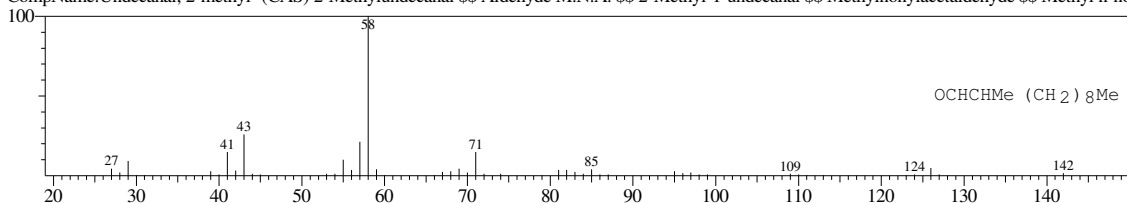

<< Target >>

Line#:31 R.Time:38.430(Scan#:3744) MassPeaks:27

RawMode:Averaged 38.420-38.440(3743-3745) BasePeak:74.05(2958)

BG Mode:Calc. from Peak Group 1 - Event 1

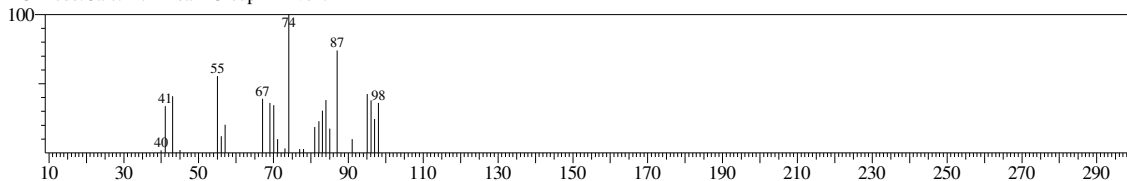

Hit#:1 Entry:93463 Library:WILEY7.LIB

SI:78 Formula:C12 H22 O2 CAS:111-81-9 MolWeight:198 RetIndex:0

CompName:10-Undecenoic acid, methyl ester (CAS) Methyl 10-undecenoate \$\$ METHYL UNDEC-10-ENOATE \$\$ Methyl undecenate \$\$ Methyl undec

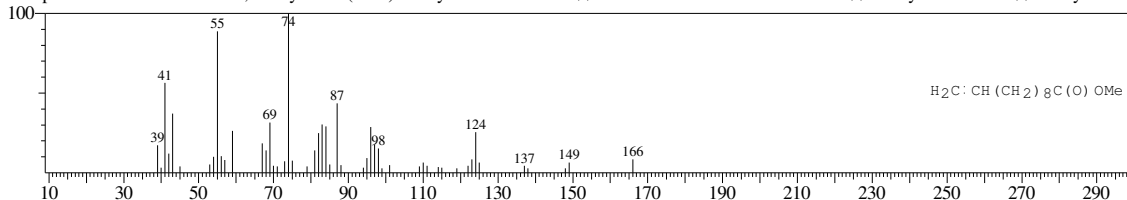

Hit#:2 Entry:207881 Library:WILEY7.LIB

SI:77 Formula:C19 H36 O2 CAS:24828-61-3 MolWeight:296 RetIndex:0

CompName:Cyclopentanetridecanoic acid, methyl ester (CAS) METHYL 13-CYCLOPENTANYLTRIDECANOATE \$\$ Methyl dihydrochaulmoograte \$\$

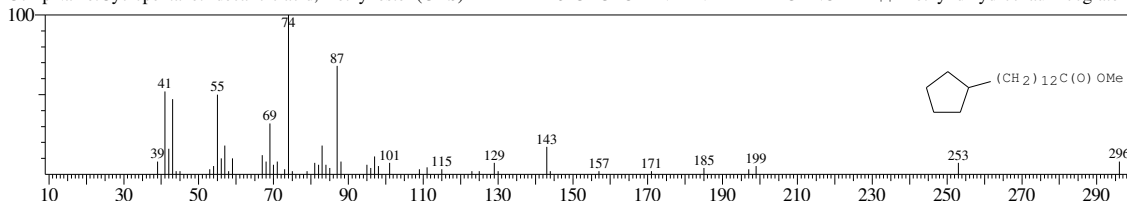

Hit#:3 Entry:159602 Library:WILEY7.LIB

SI:77 Formula:C16 H28 O2 CAS:56909-04-7 MolWeight:252 RetIndex:0

CompName:14-Pentadecynoic acid, methyl ester (CAS) METHYL-PENTADEC-14-YNOATE \$\$

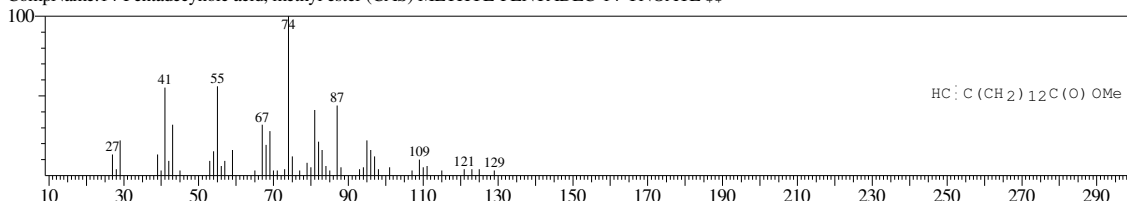

Hit#:4 Entry:207882 Library:WILEY7.LIB

SI:77 Formula:C19 H36 O2 CAS:24828-61-3 MolWeight:296 RetIndex:0

CompName:Cyclopentanetridecanoic acid, methyl ester (CAS) METHYL 13-CYCLOPENTANYLTRIDECANOATE \$\$ Methyl dihydrochaulmoograte \$\$

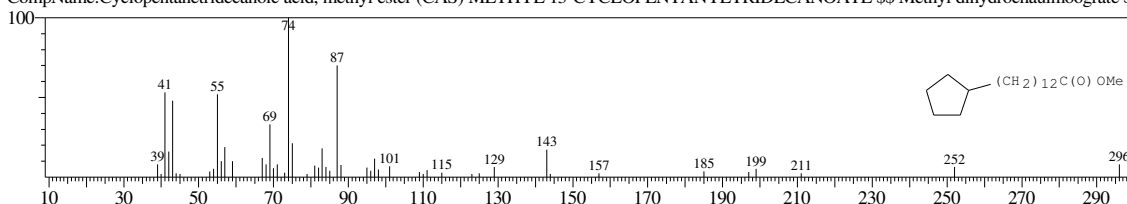

Hit#:5 Entry:93467 Library:WILEY7.LIB

SI:77 Formula:C12 H22 O2 CAS:111-81-9 MolWeight:198 RetIndex:0

CompName:10-Undecenoic acid, methyl ester (CAS) Methyl 10-undecenoate \$\$ METHYL UNDEC-10-ENOATE \$\$ Methyl undecenate \$\$ Methyl undec

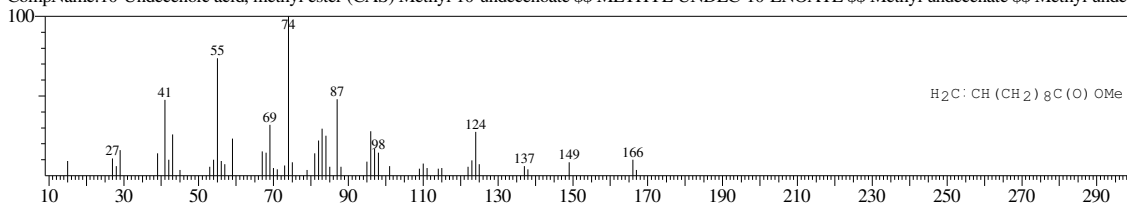

<< Target >>

Line#:32 R.Time:38.950(Scan#:3796) MassPeaks:28

RawMode:Averaged 38.940-38.960(3795-3797) BasePeak:67.05(3165)

BG Mode:Calc. from Peak Group 1 - Event 1

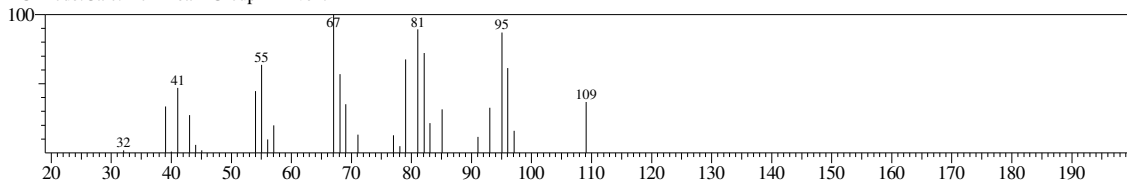

Hit#:1 Entry:157378 Library:WILEY7.LIB

SI:84 Formula:C18 H34 CAS:35365-59-4 MolWeight:250 RetIndex:0

CompName:9-Octadecyne (CAS)

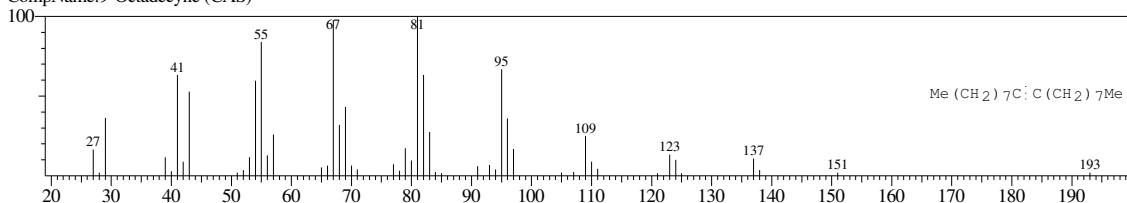

Hit#:2 Entry:17366 Library:WILEY7.LIB

SI:84 Formula:C9 H16 CAS:13152-05-1 MolWeight:124 RetIndex:0

CompName:CYCLOOCTENE, 3-METHYL- \$\$

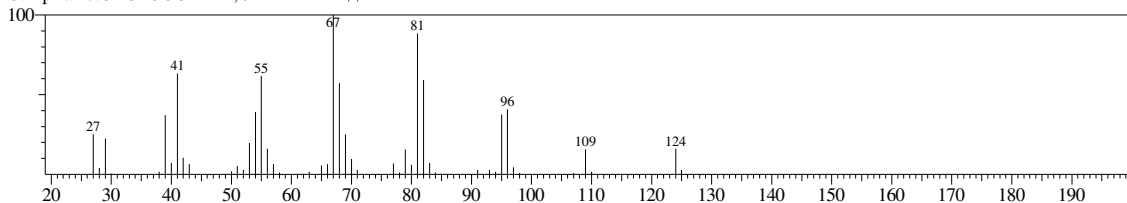

Hit#:3 Entry:179982 Library:WILEY7.LIB

SI:84 Formula:C17 H31 Cl CAS:56554-75-7 MolWeight:270 RetIndex:0

CompName:7-Heptadecyne, 17-chloro- (CAS) 1 CHLORO-HEPTADEC-10-YNE \$\$

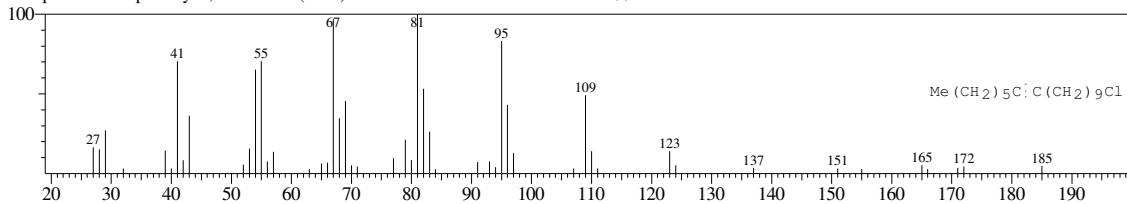

Hit#:4 Entry:56386 Library:WILEY7.LIB

SI:84 Formula:C12 H22 CAS:1486-75-5 MolWeight:166 RetIndex:0

CompName:Cyclododecene, (E)- (CAS) (E)-Cyclododecene \$\$

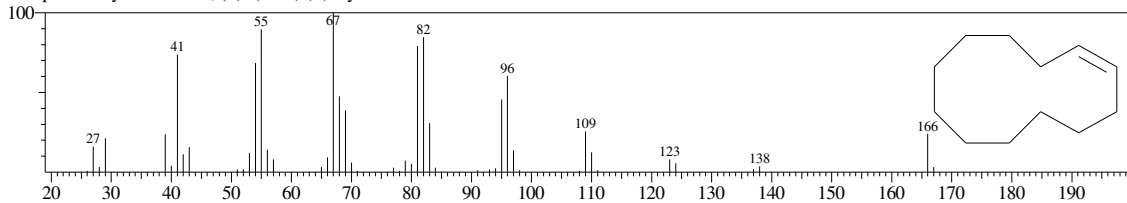

Hit#:5 Entry:157380 Library:WILEY7.LIB

SI:84 Formula:C18 H34 CAS:71899-42-8 MolWeight:250 RetIndex:0

CompName:5-Octadecyne (CAS)

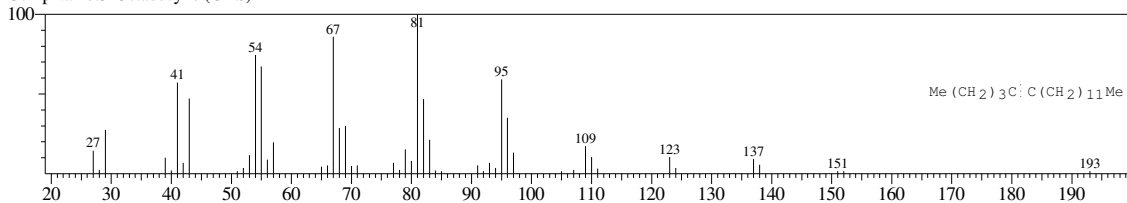

<< Target >>

Line#:33 R.Time:39.860(Scan#:3887) MassPeaks:17

RawMode:Averaged 39.850-39.870(3886-3888) BasePeak:57.10(2249)

BG Mode:Calc. from Peak Group 1 - Event 1

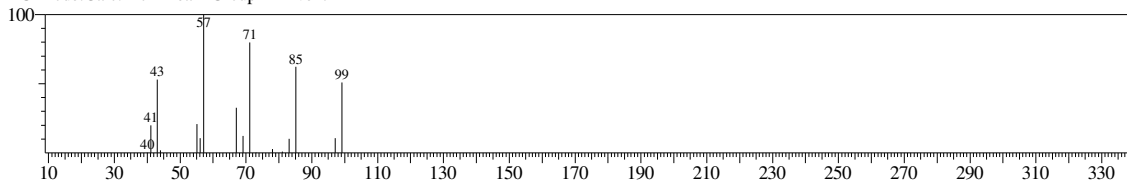

Hit#:1 Entry:128619 Library:WILEY7.LIB

SI:86 Formula:C14 H31 B O CAS:0-00-0 MolWeight:226 RetIndex:0

CompName:DIETHYL(DECYLOXY)-BORANE \$\$

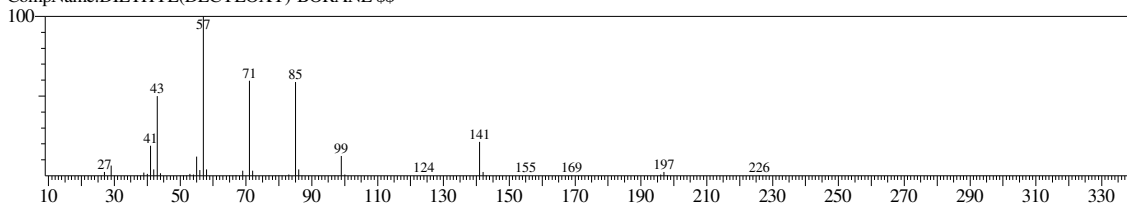

Hit#:2 Entry:207748 Library:WILEY7.LIB

SI:85 Formula:C12 H25 I CAS:4292-19-7 MolWeight:296 RetIndex:0

CompName:Dodecane, 1-iodo- (CAS) n-Dodecyl iodide \$\$ Dodecyl iodide \$\$ Lauryl iodide \$\$ 1-Iodododecane \$\$ DODECAN, 1-JODO- \$\$

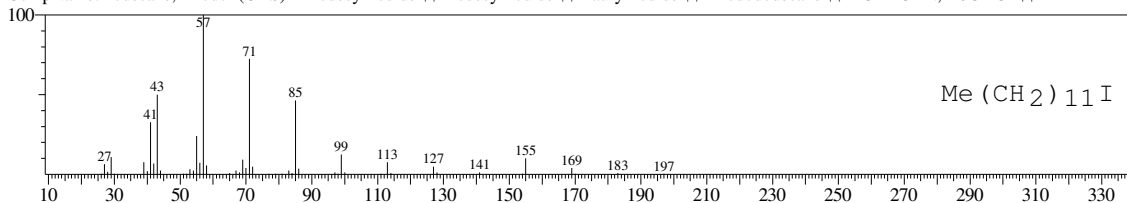

Hit#:3 Entry:245575 Library:WILEY7.LIB

SI:84 Formula:C24 H50 CAS:646-31-1 MolWeight:338 RetIndex:0

CompName:Tetracosane (CAS) n-Tetracosane \$\$

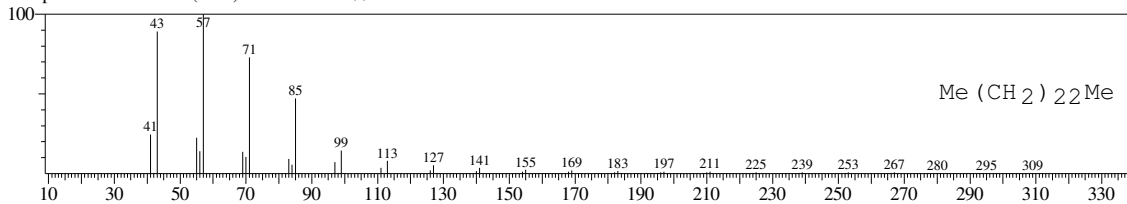

Hit#:4 Entry:288437 Library:WILEY7.LIB

SI:84 Formula:C29 H60 CAS:630-03-5 MolWeight:408 RetIndex:0

CompName:Nonacosane (CAS) n-Nonacosane \$\$

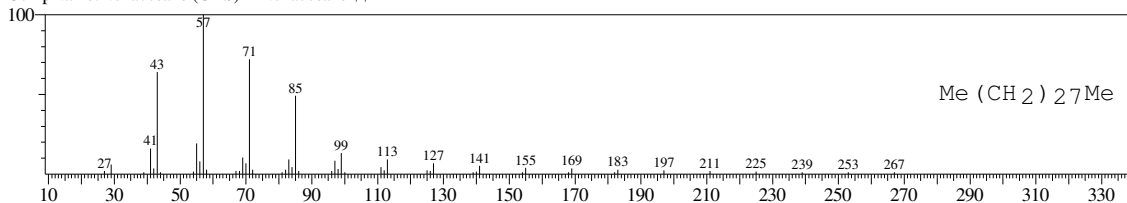

Hit#:5 Entry:233986 Library:WILEY7.LIB

SI:84 Formula:C14 H29 I CAS:19218-94-1 MolWeight:324 RetIndex:0

CompName:Tetradecane, 1-iodo- \$\$ Tetradecyl iodide \$\$ MYRISTYL IODIDE \$\$ 1-Iodotetradecane \$\$

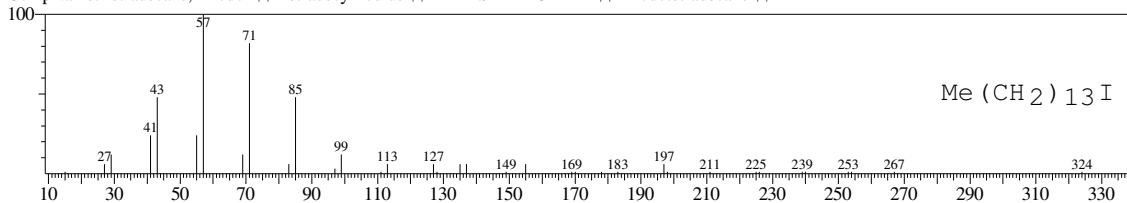

<< Target >>

Line#:34 R.Time:40.210(Scan#:3922) MassPeaks:9

RawMode:Averaged 40.200-40.220(3921-3923) BasePeak:85.10(446)

BG Mode:Calc. from Peak Group 1 - Event 1

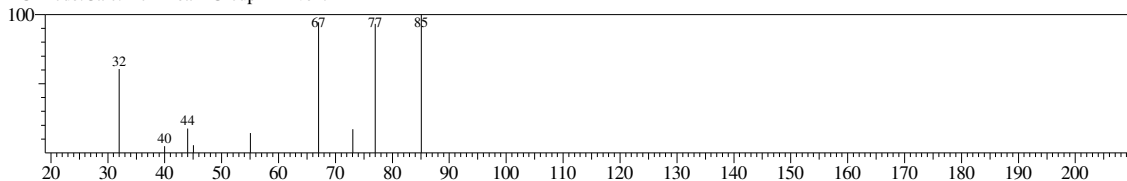

Hit#:1 Entry:94818 Library:WILEY7.LIB

SI:64 Formula:C10 H16 O4 CAS:0-00-0 MolWeight:200 RetIndex:0

CompName:Methyl 3-[(Tetrahydropyranyl)oxy]but-2-enoate \$\$

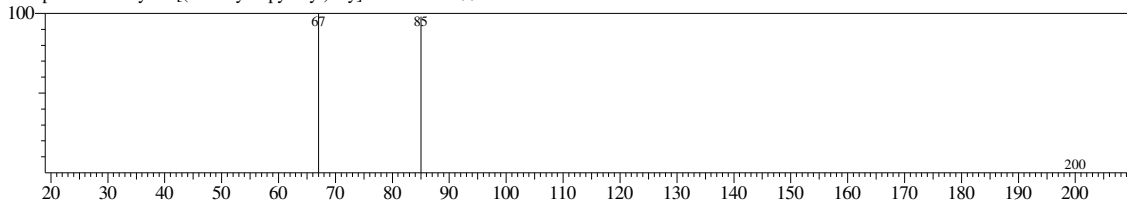

Hit#:2 Entry:90108 Library:WILEY7.LIB

SI:63 Formula:C12 H20 O2 CAS:15456-69-6 MolWeight:196 RetIndex:0

CompName:2(3H)-Furanone, dihydro-5-(2-octenyl)- (CAS) CIS-4-HYDROXY-6-DODECANOIC ACID LACTONE \$\$ 6-Dodecenoic acid, 4-hydroxy-, .g

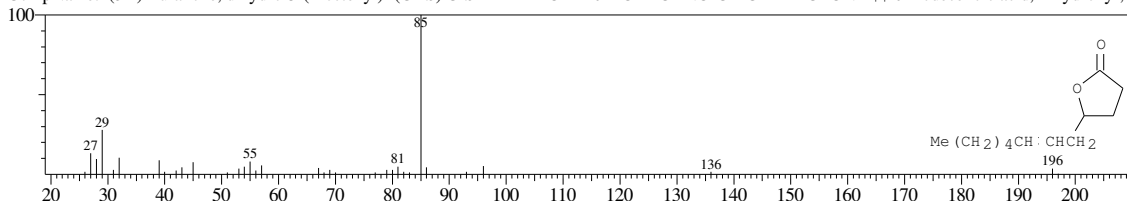

Hit#:3 Entry:87454 Library:WILEY7.LIB

SI:62 Formula:C12 H18 O2 CAS:0-00-0 MolWeight:194 RetIndex:0

CompName:2-exo-(1-oxacyclohex-2-yloxy)bicyclo[2.2.1]hepta-5-ene \$\$

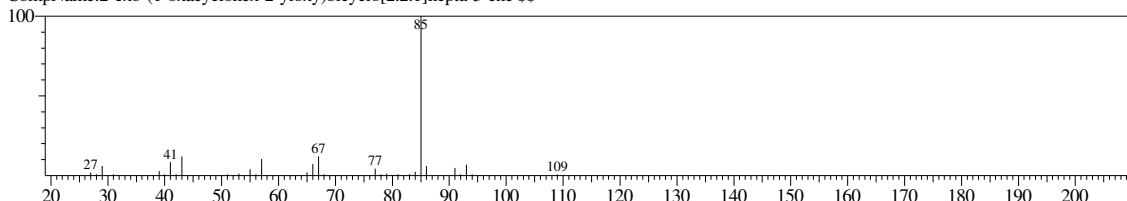

Hit#:4 Entry:21565 Library:WILEY7.LIB

SI:61 Formula:C5 H6 O4 CAS:4344-84-7 MolWeight:130 RetIndex:0

CompName:5-OXO-TETRAHYDRO-FURAN-2-CARBOXYLIC ACID \$\$

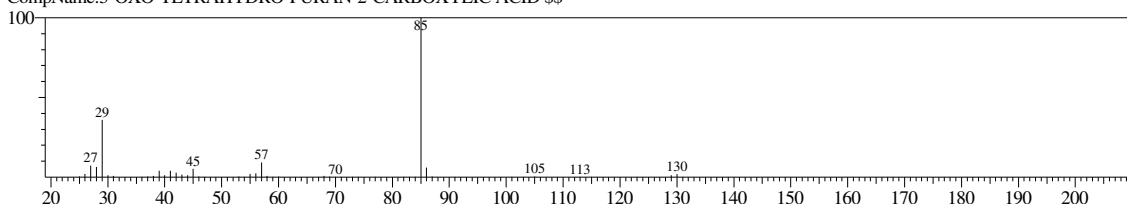

Hit#:5 Entry:6875 Library:WILEY7.LIB

SI:61 Formula:C5 H12 SI CAS:754-05-2 MolWeight:100 RetIndex:0

CompName:Silane, ethenyltrimethyl- (CAS) Vinyltrimethylsilane \$\$ 3,3-DIMETHYL-3-SILA-BUTENE \$\$ Trimethylvinylsilane \$\$ Silane, trimethylvinyl-

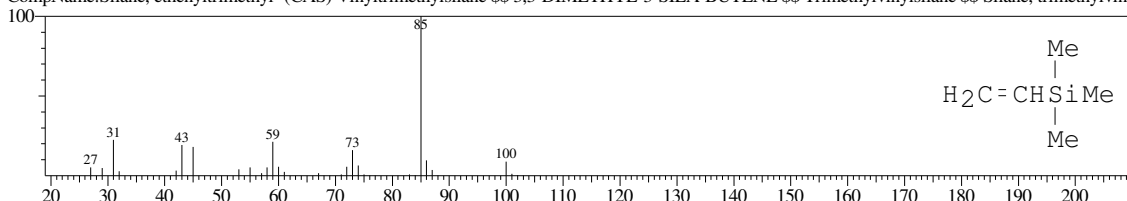

<< Target >>

Line#:35 R.Time:40.870(Scan#:3988) MassPeaks:14

RawMode:Averaged 40.860-40.880(3987-3989) BasePeak:73.00(739)

BG Mode:Calc. from Peak Group 1 - Event 1

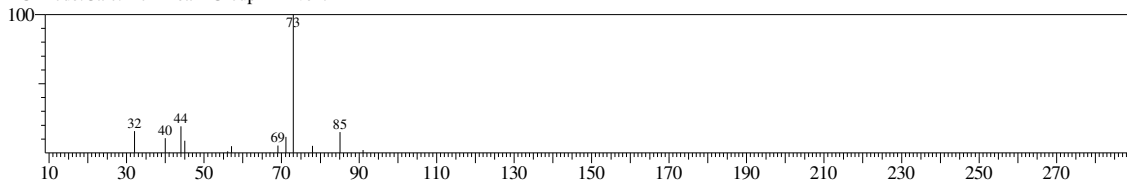

Hit#:1 Entry:21357 Library:WILEY7.LIB

SI:79 Formula:C7 H14 O2 CAS:2568-29-8 MolWeight:130 RetIndex:0

CompName:1,3-Dioxolane, 2-(1,1-dimethylethyl)- (CAS) 2-T-BUTYL-1,3-DIOXOLANE \$\$ 1,3-Dioxolane, 2-tert-butyl- \$\$

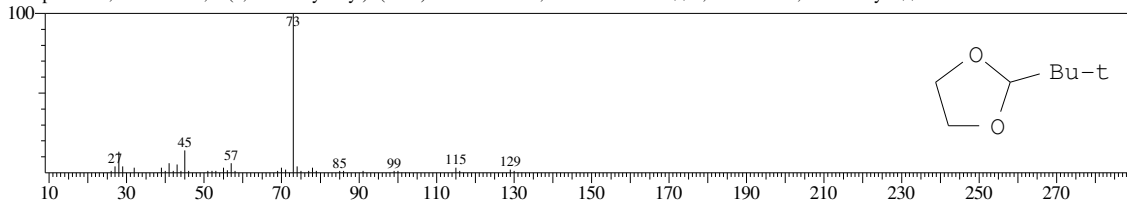

Hit#:2 Entry:62678 Library:WILEY7.LIB

SI:78 Formula:C10 H20 O2 CAS:4359-57-3 MolWeight:172 RetIndex:0

CompName:1,3-Dioxolane, 2-heptyl- (CAS) Octanal, cyclic 1,2-ethanediyl acetal \$\$ 2-Heptyl-1,3-dioxolane \$\$ 2-Heptyldioxolane \$\$ Octanal ethylene acetal

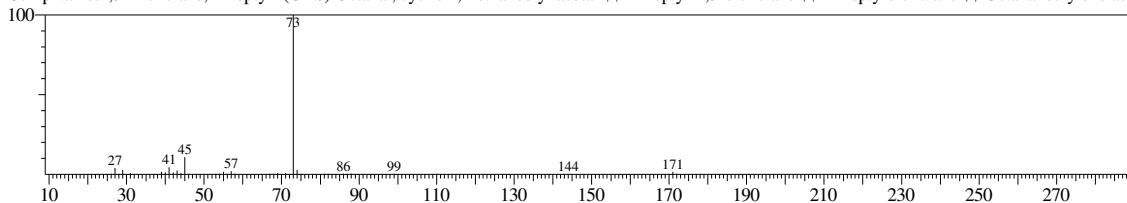

Hit#:3 Entry:21355 Library:WILEY7.LIB

SI:78 Formula:C7 H14 O2 CAS:4360-76-3 MolWeight:130 RetIndex:0

CompName:1,3-Dioxolane, 2-butyl- (CAS) 2-N-BUTYL-1,3-DIOXOLANE \$\$ 2-Butyl-1,3-dioxolane \$\$

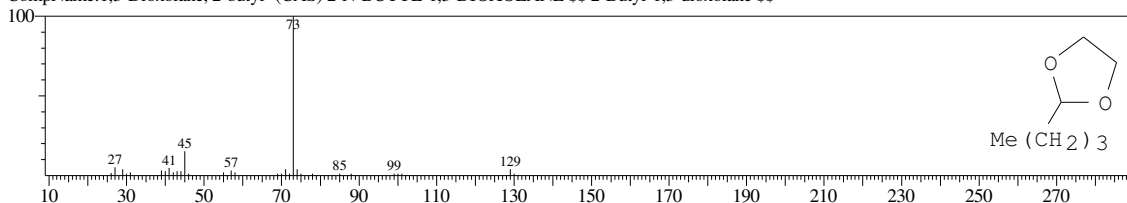

Hit#:4 Entry:195626 Library:WILEY7.LIB

SI:77 Formula:C18 H36 O2 CAS:4360-57-0 MolWeight:284 RetIndex:0

CompName:1,3-Dioxolane, 2-pentadecyl- (CAS) 2-PENTADECYL-1,3-DIOXOLANE \$\$ Hexadecanal cyclic ethylene acetal \$\$ HEXADECANAL ETHY

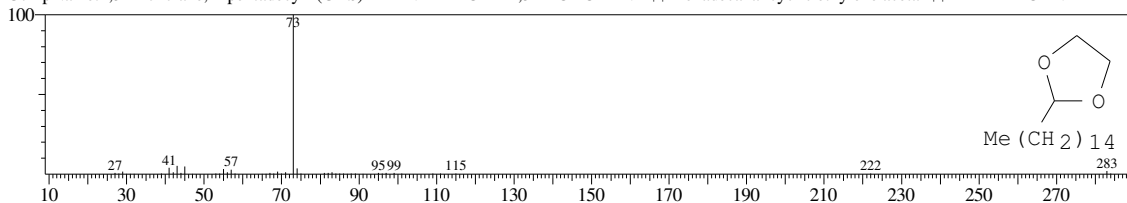

Hit#:5 Entry:13797 Library:WILEY7.LIB

SI:76 Formula:C6 H12 O2 CAS:3390-13-4 MolWeight:116 RetIndex:0

CompName:1,3-Dioxolane, 2-propyl- (CAS) 2-Propyldioxolane \$\$ 2-Propyl-1,3-dioxolane \$\$ Butanal, cyclic 1,2-ethanediyl acetal \$\$

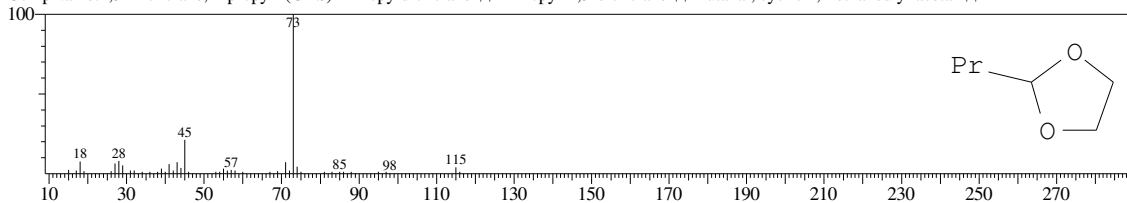

<< Target >>

Line#:36 R.Time:41.050(Scan#:4006) MassPeaks:16

RawMode:Averaged 41.040-41.060(4005-4007) BasePeak:60.00(1020)

BG Mode:Calc. from Peak Group 1 - Event 1

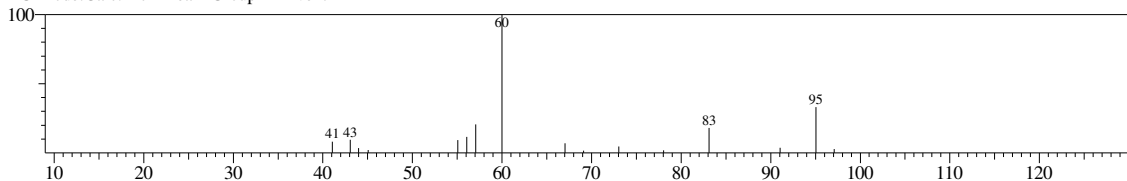

Hit#:1 Entry:72580 Library:WILEY7.LIB

SI:77 Formula:C12 H21 D2 N CAS:56324-33-5 MolWeight:181 RetIndex:0

CompName:1-METHYL-CIS-2-(N,N-DIMETHYLAMINOMETHYL-D2)ISOPROPYLIDENECYCLOPENTANE \$\$

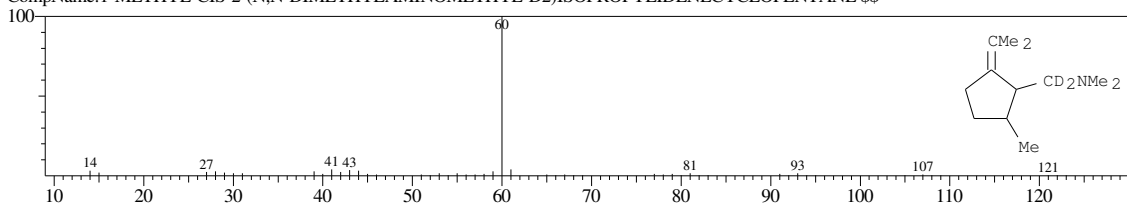

Hit#:2 Entry:13596 Library:WILEY7.LIB

SI:75 Formula:C6 H12 O2 CAS:105-43-1 MolWeight:116 RetIndex:0

CompName:Pentanoic acid, 3-methyl- (CAS) 3-Methylvaleric acid \$\$ 3-Methylpentanoic acid \$\$ Valeric acid, 3-methyl- \$.beta.-Methylvaleric acid \$\$ 3-

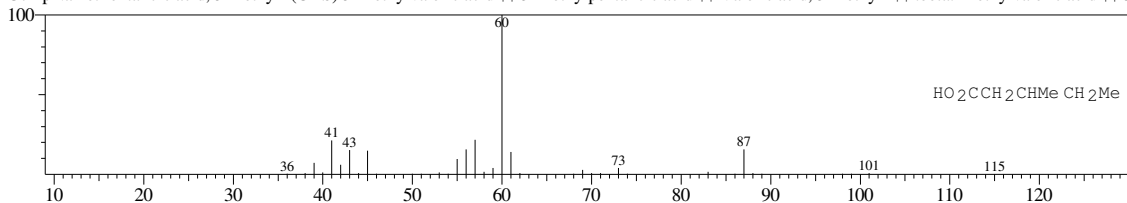

Hit#:3 Entry:13597 Library:WILEY7.LIB

SI:74 Formula:C6 H12 O2 CAS:105-43-1 MolWeight:116 RetIndex:0

CompName:Pentanoic acid, 3-methyl- (CAS) 3-Methylvaleric acid \$\$ 3-Methylpentanoic acid \$\$ Valeric acid, 3-methyl- \$.beta.-Methylvaleric acid \$\$ 3-

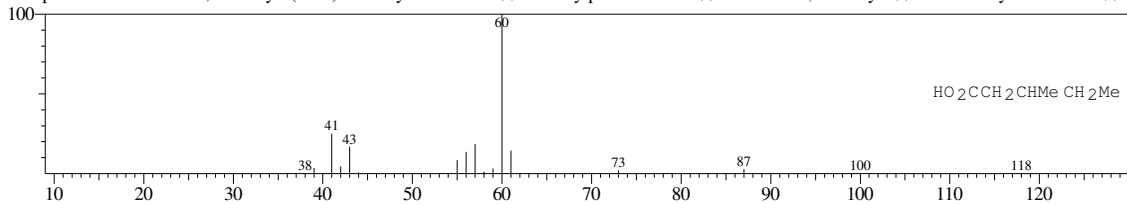

Hit#:4 Entry:7715 Library:WILEY7.LIB

SI:73 Formula:C5 H10 O2 CAS:109-52-4 MolWeight:102 RetIndex:0

CompName:Pentanoic acid (CAS) Valeric acid \$\$ n-Valeric acid \$\$ Valerianic acid \$\$ n-Pentanoic acid \$\$ Propylacetic acid \$\$ 1-Butanecarboxylic acid \$

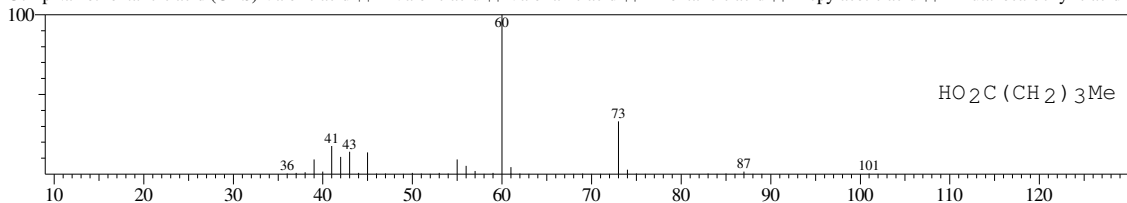

Hit#:5 Entry:13599 Library:WILEY7.LIB

SI:73 Formula:C6 H12 O2 CAS:105-43-1 MolWeight:116 RetIndex:0

CompName:Pentanoic acid, 3-methyl- (CAS) 3-Methylvaleric acid \$\$ 3-Methylpentanoic acid \$\$ Valeric acid, 3-methyl- \$.beta.-Methylvaleric acid \$\$ 3-

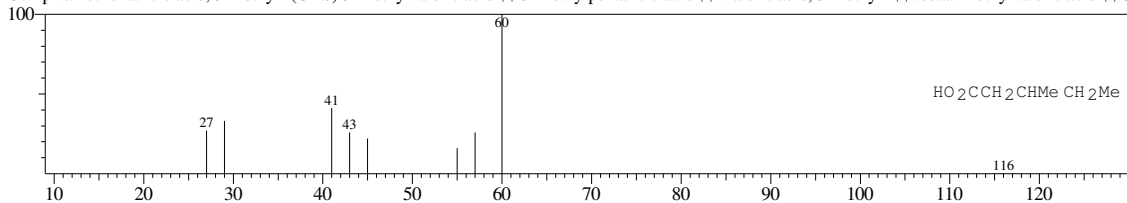

<< Target >>

Line#:37 R.Time:42.690(Scan#:4170) MassPeaks:19

RawMode:Averaged 42.680-42.700(4169-4171) BasePeak:82.05(1168)

BG Mode:Calc. from Peak Group 1 - Event 1

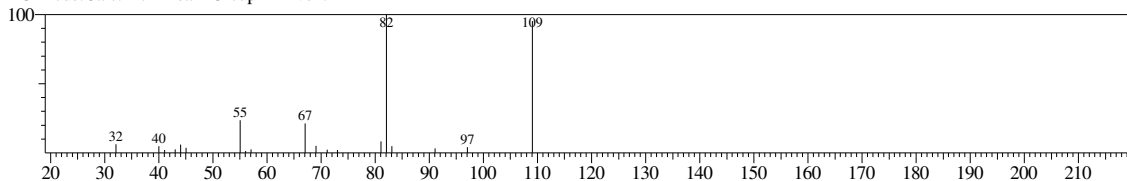

Hit#:1 Entry:9623 Library:WILEY7.LIB

SI:75 Formula:C5 H7 N3 CAS:0-00-0 MolWeight:109 RetIndex:0

CompName:5-Iminopyrrolidine-2-carbonitrile \$\$

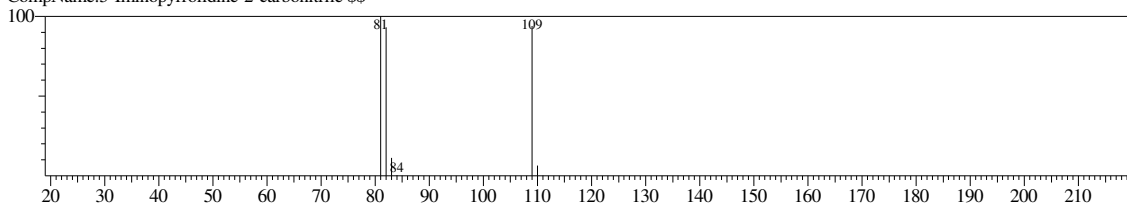

Hit#:2 Entry:62072 Library:WILEY7.LIB

SI:75 Formula:C8 H9 CL O2 CAS:76430-41-6 MolWeight:172 RetIndex:0

CompName:7-Chloro-1-hydroxy-7-methylbicyclo[3.2.0]hept-2-en-6-one \$\$

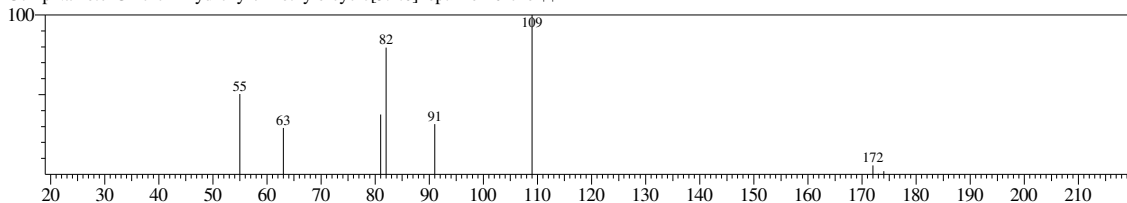

Hit#:3 Entry:110376 Library:WILEY7.LIB

SI:74 Formula:C12 H20 O3 CAS:107289-10-1 MolWeight:212 RetIndex:0

CompName:(2R,5R,6R)-5-allyl-2-t-butyl-5,6-dimethyl-1,3-dioxan-4-one \$1,3-Dioxan-4-one, 2-(1,1-dimethylethyl)-6-methyl-5-(2-propenyl)-, [2R-(2.alpha.

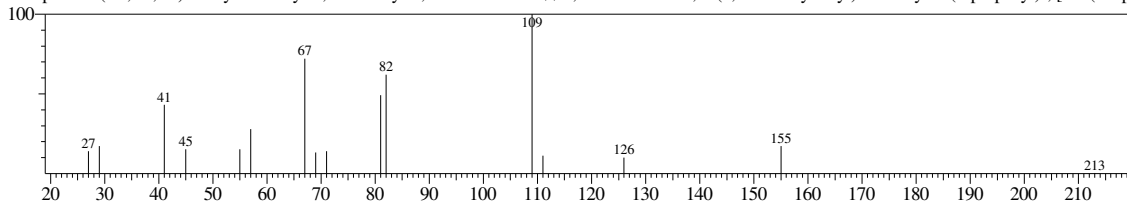

Hit#:4 Entry:71475 Library:WILEY7.LIB

SI:74 Formula:C13 H24 CAS:0-00-0 MolWeight:180 RetIndex:0

CompName:5,9,9-TRIMETHYLSPIRO[3.6]DECANE \$\$

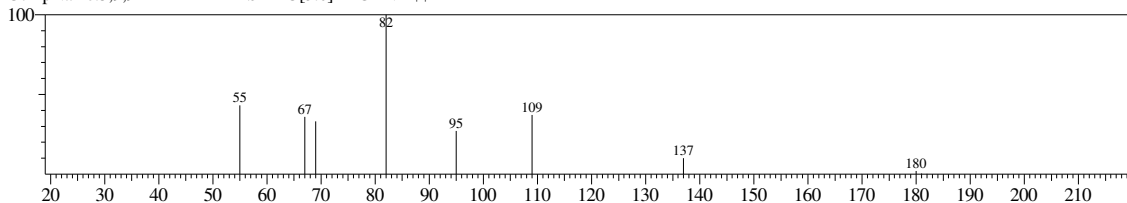

Hit#:5 Entry:29271 Library:WILEY7.LIB

SI:73 Formula:C9 H16 O CAS:0-00-0 MolWeight:140 RetIndex:0

CompName:(2R)-2-Methyl-2-(4-methyl-3-pentenyl)oxirane \$\$

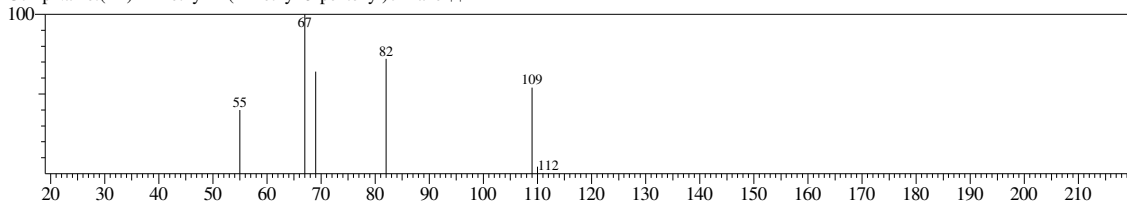

<< Target >>

Line#:38 R.Time:43.320(Scan#:4233) MassPeaks:19

RawMode:Averaged 43.310-43.330(4232-4234) BasePeak:57.05(2840)

BG Mode:Calc. from Peak Group 1 - Event 1

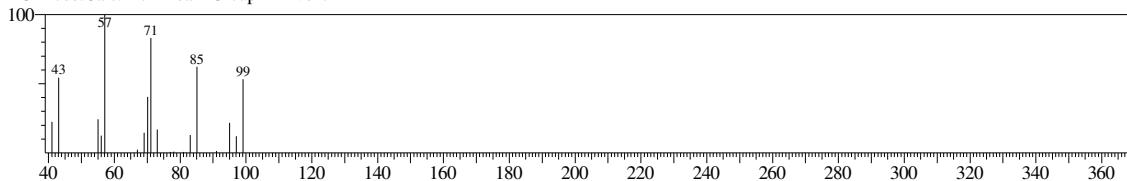

Hit#:1 Entry:261545 Library:WILEY7.LIB

SI:84 Formula:C16 H19 N5 O5 CAS:130138-26-0 MolWeight:361 RetIndex:0

CompName:3',4'-dihydro-2'-(morpholin-4-yl)-5',7'-dinitrospiro[cyclopentane-1,3'-(1'H)-quinoxaline], 3'-(4-morpho

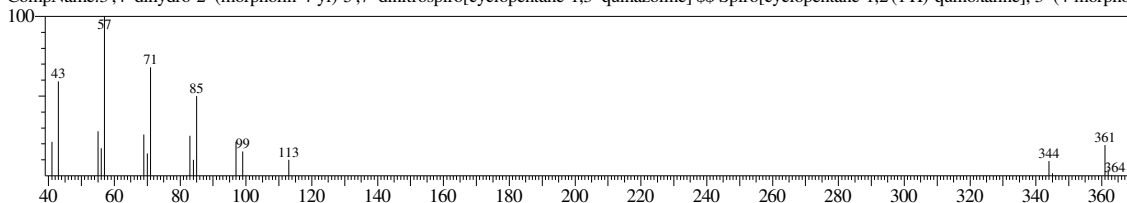

Hit#:2 Entry:245575 Library:WILEY7.LIB

SI:84 Formula:C24 H50 CAS:646-31-1 MolWeight:338 RetIndex:0

CompName:Tetracosane (CAS) n-Tetracosane \$\$

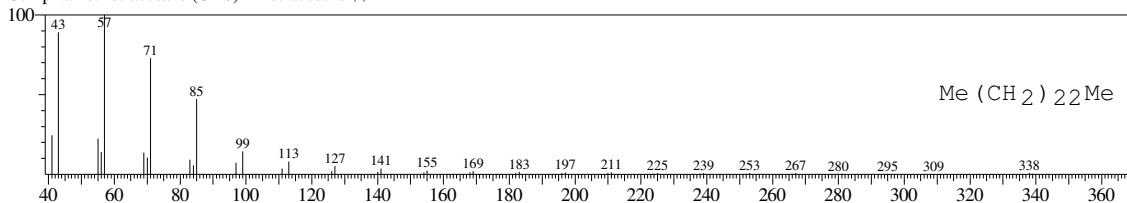

Hit#:3 Entry:207678 Library:WILEY7.LIB

SI:83 Formula:C21 H44 CAS:54833-48-6 MolWeight:296 RetIndex:0

CompName:Heptadecane, 2,6,10,15-tetramethyl- (CAS) 2,6,10,15-TETRAMETHYLHEPTADECANE \$\$

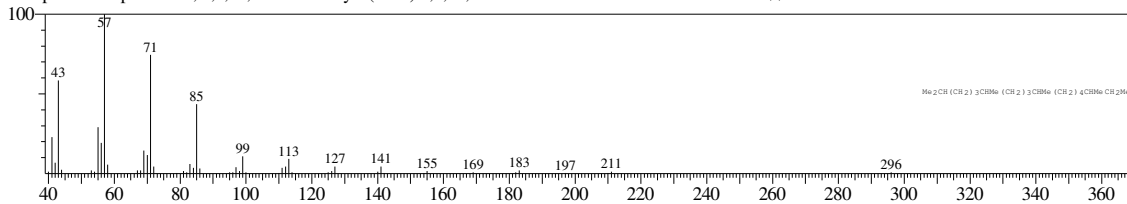

Hit#:4 Entry:129211 Library:WILEY7.LIB

SI:83 Formula:C16 H34 CAS:544-76-3 MolWeight:226 RetIndex:0

CompName:Hexadecane (CAS) n-Hexadecane \$\$ Cetane \$\$ n-Cetane \$\$ Isohexadecane \$\$ HEXADECAN \$\$

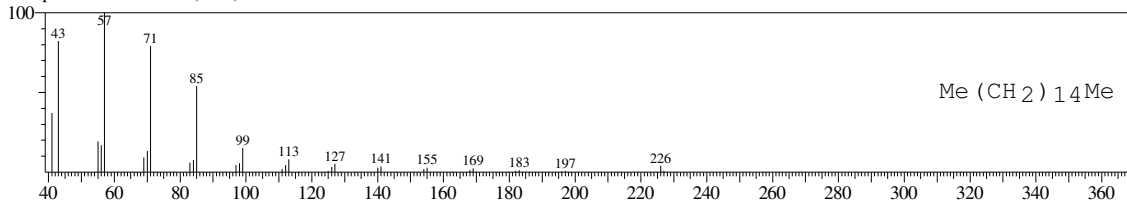

Hit#:5 Entry:162360 Library:WILEY7.LIB

SI:82 Formula:C18 H38 CAS:593-45-3 MolWeight:254 RetIndex:0

CompName:Octadecane (CAS) n-Octadecane \$\$ Octadecan \$\$

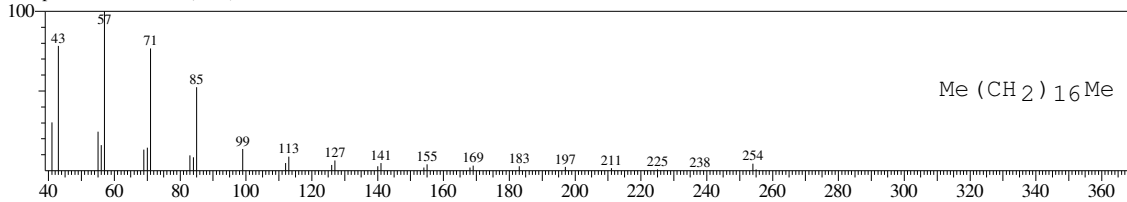

<< Target >>

Line#:39 R.Time:44.370(Scan#:4338) MassPeaks:14

RawMode:Averaged 44.360-44.380(4337-4339) BasePeak:73.05(832)

BG Mode:Calc. from Peak Group 1 - Event 1

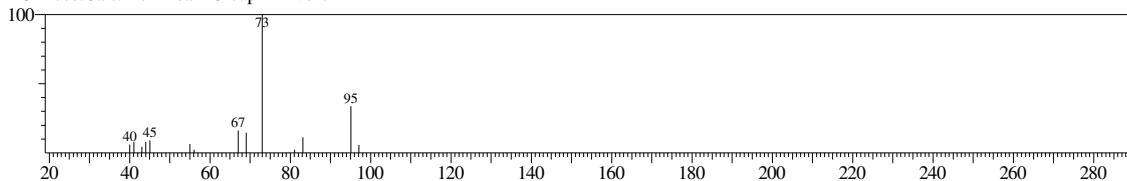

Hit#:1 Entry:79188 Library:WILEY7.LIB

SI:81 Formula:C11 H22 O2 CAS:3613-30-7 MolWeight:186 RetIndex:0

CompName:Octanal, 7-methoxy-3,7-dimethyl- (CAS) Methoxycitronellal \$\$ 7-Methoxy-3,7-dimethyloctanal \$\$ 3,7-Dimethyl-7-methoxy-1-octanal \$\$ 1-O

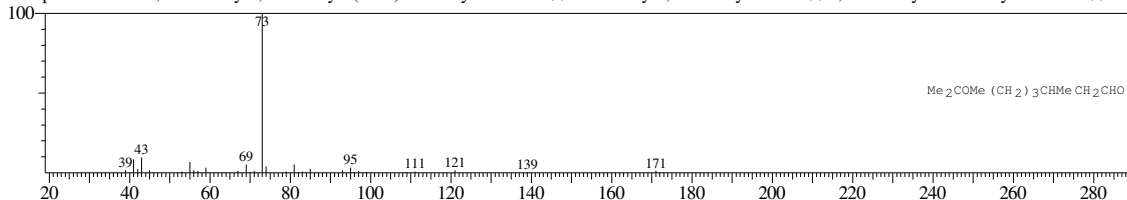

Hit#:2 Entry:62678 Library:WILEY7.LIB

SI:81 Formula:C10 H20 O2 CAS:4359-57-3 MolWeight:172 RetIndex:0

CompName:1,3-Dioxolane, 2-heptyl- (CAS) Octanal, cyclic 1,2-ethanediyl acetal \$\$ 2-Heptyl-1,3-dioxolane \$\$ 2-Heptyldioxolane \$\$ Octanal ethylene acet

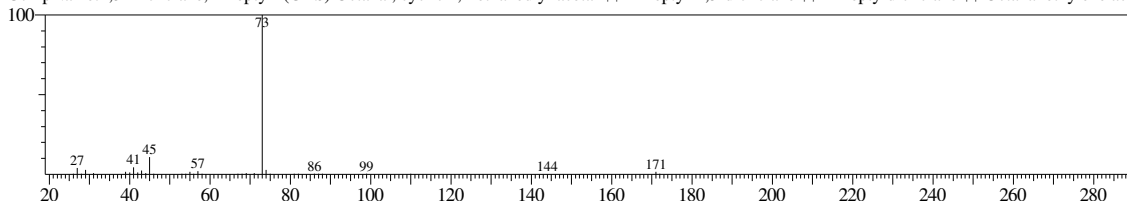

Hit#:3 Entry:65249 Library:WILEY7.LIB

SI:80 Formula:C10 H22 O2 CAS:53273-13-5 MolWeight:174 RetIndex:0

CompName:Hexane, 2,5-dimethoxy-2,5-dimethyl- (CAS) 2,5-Dimethoxy-2,5-dimethylhexane \$\$

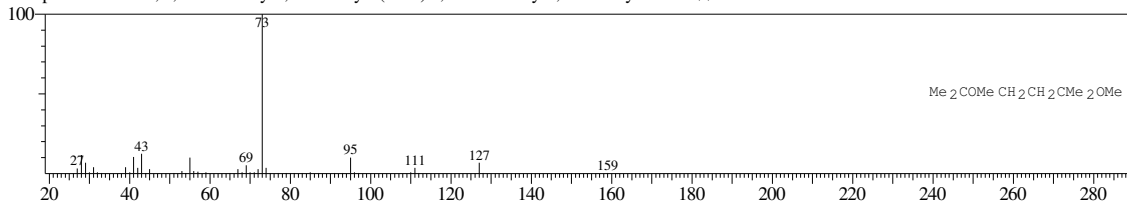

Hit#:4 Entry:195626 Library:WILEY7.LIB

SI:80 Formula:C18 H36 O2 CAS:4360-57-0 MolWeight:284 RetIndex:0

CompName:1,3-Dioxolane, 2-pentadecyl- (CAS) 2-PENTADECYL-1,3-DIOXOLANE \$\$ Hexadecanal cyclic ethylene acetal \$\$ HEXADECANAL ETHY

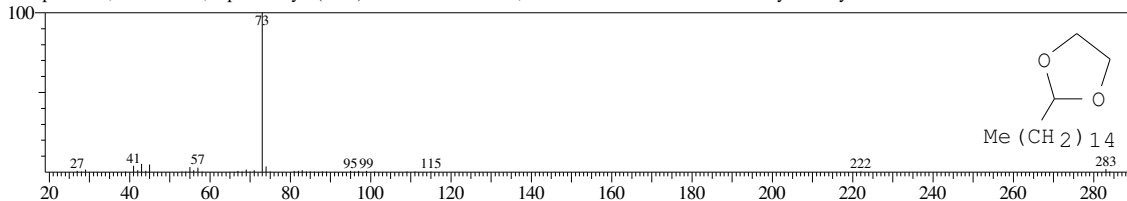

Hit#:5 Entry:195627 Library:WILEY7.LIB

SI:79 Formula:C18 H36 O2 CAS:4360-57-0 MolWeight:284 RetIndex:0

CompName:1,3-Dioxolane, 2-pentadecyl- (CAS) 2-PENTADECYL-1,3-DIOXOLANE \$\$ Hexadecanal cyclic ethylene acetal \$\$ HEXADECANAL ETHY

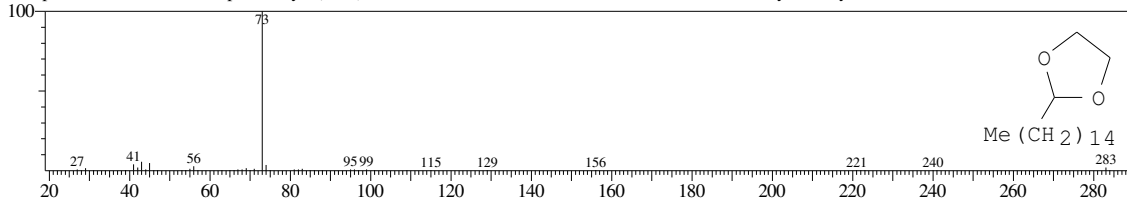

<< Target >>

Line#:40 R.Time:44.480(Scan#:4349) MassPeaks:17

RawMode:Averaged 44.470-44.490(4348-4350) BasePeak:73.05(837)

BG Mode:Calc. from Peak Group 1 - Event 1

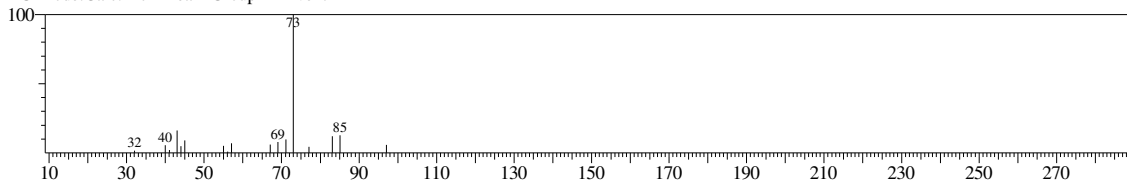

Hit#:1 Entry:195626 Library:WILEY7.LIB

SI:82 Formula:C18 H36 O2 CAS:4360-57-0 MolWeight:284 RetIndex:0

CompName:1,3-Dioxolane, 2-pentadecyl- (CAS) 2-PENTADECYL-1,3-DIOXOLANE \$\$ Hexadecanal cyclic ethylene acetal \$\$ HEXADECANAL ETHY

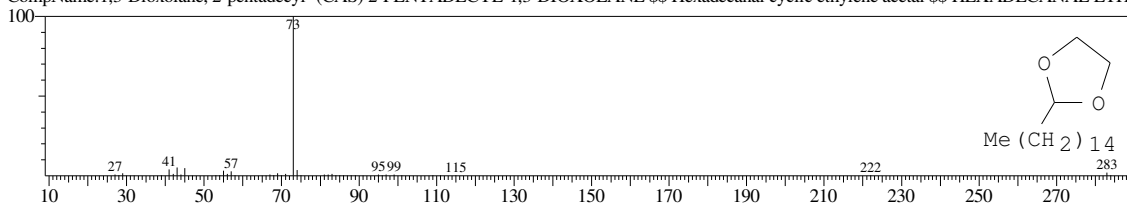

Hit#:2 Entry:62678 Library:WILEY7.LIB

SI:81 Formula:C10 H20 O2 CAS:4359-57-3 MolWeight:172 RetIndex:0

CompName:1,3-Dioxolane, 2-heptyl- (CAS) Octanal, cyclic 1,2-ethanediyl acetal \$\$ 2-Heptyl-1,3-dioxolane \$\$ 2-Heptyldioxolane \$\$ Octanal ethylene acet

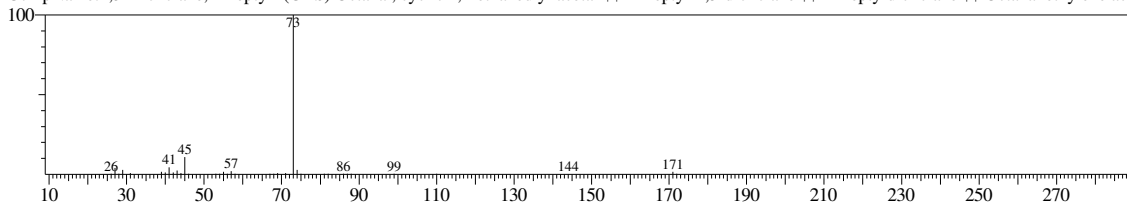

Hit#:3 Entry:107918 Library:WILEY7.LIB

SI:81 Formula:C12 H18 O3 CAS:0-00-0 MolWeight:210 RetIndex:0

CompName:2-Cyclohexen-1-one, 4-(1,3-dioxolan-2-yl)-3,5,5-trimethyl- \$\$

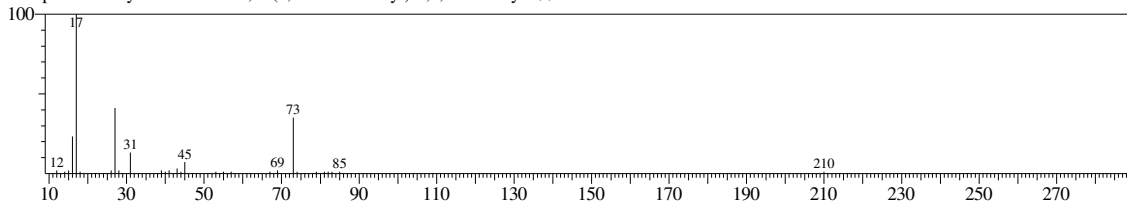

Hit#:4 Entry:13797 Library:WILEY7.LIB

SI:81 Formula:C6 H12 O2 CAS:3390-13-4 MolWeight:116 RetIndex:0

CompName:1,3-Dioxolane, 2-propyl- (CAS) 2-Propyldioxolane \$\$ 2-Propyl-1,3-dioxolane \$\$ Butanal, cyclic 1,2-ethanediyl acetal \$\$

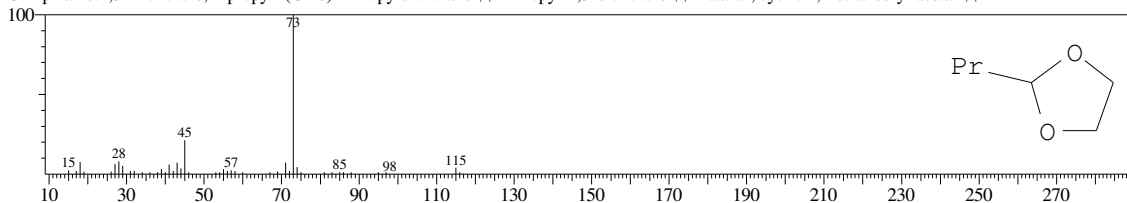

Hit#:5 Entry:22677 Library:WILEY7.LIB

SI:81 Formula:C7 H16 O2 CAS:74421-00-4 MolWeight:132 RetIndex:0

CompName:Butane, 2,3-dimethoxy-2-methyl- (CAS) ETHANE, 1,2-DIMETHOXY-1,1,2-TRIMETHYL- \$\$

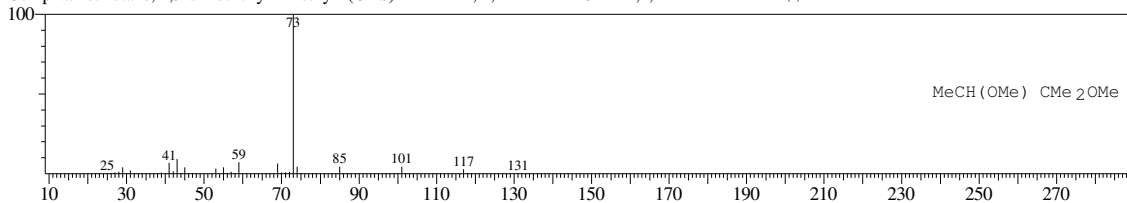

<< Target >>

Line#:41 R.Time:47.810(Scan#:4682) MassPeaks:21

RawMode:Averaged 47.800-47.820(4681-4683) BasePeak:57.05(3408)

BG Mode:Calc. from Peak Group 1 - Event 1

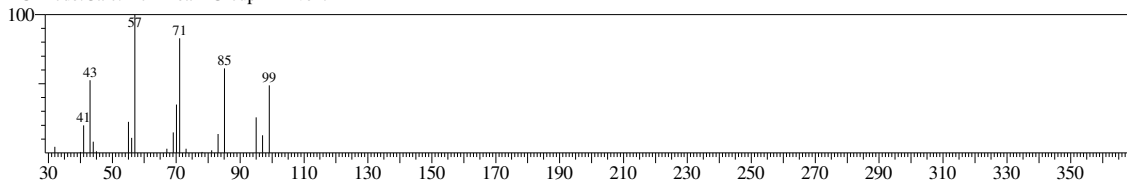

Hit#:1 Entry:207678 Library:WILEY7.LIB

SI:84 Formula:C21 H44 CAS:54833-48-6 MolWeight:296 RetIndex:0

CompName:Heptadecane, 2,6,10,15-tetramethyl- (CAS) 2,6,10,15-TETRAMETHYLHEPTADECANE \$\$

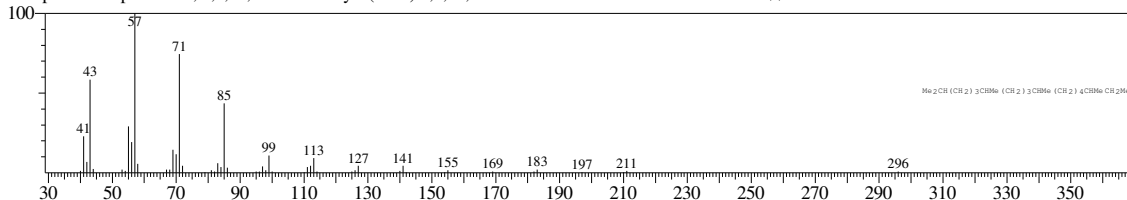

Hit#:2 Entry:261545 Library:WILEY7.LIB

SI:84 Formula:C16 H19 N5 O5 CAS:130138-26-0 MolWeight:361 RetIndex:0

CompName:3',4'-dihydro-2'-(morpholin-4-yl)-5',7'-dinitrospiro[cyclopentane-1,3'-quinazoline] \$\$ Spiro[cyclopentane-1,2'(1'H)-quinoxaline], 3'-(4-morpho

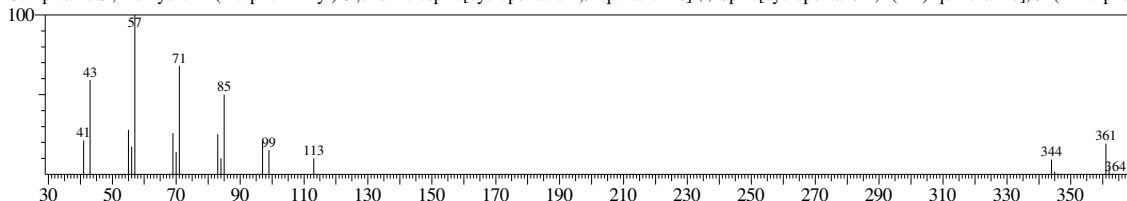

Hit#:3 Entry:245575 Library:WILEY7.LIB

SI:83 Formula:C24 H50 CAS:646-31-1 MolWeight:338 RetIndex:0

CompName:Tetracosane (CAS) n-Tetracosane \$\$

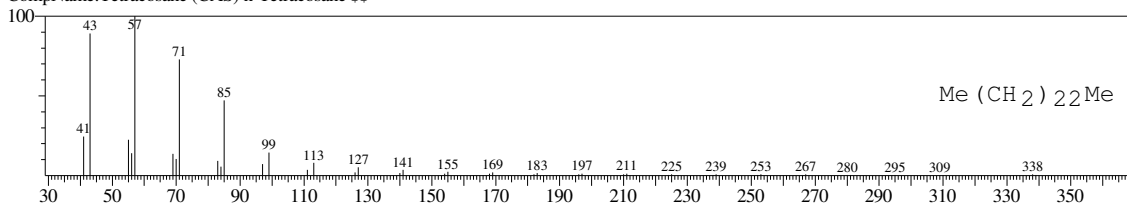

Hit#:4 Entry:129211 Library:WILEY7.LIB

SI:82 Formula:C16 H34 CAS:544-76-3 MolWeight:226 RetIndex:0

CompName:Hexadecane (CAS) n-Hexadecane \$\$ Cetane \$\$ n-Cetane \$\$ Isohexadecane \$\$ HEXADECAN \$\$

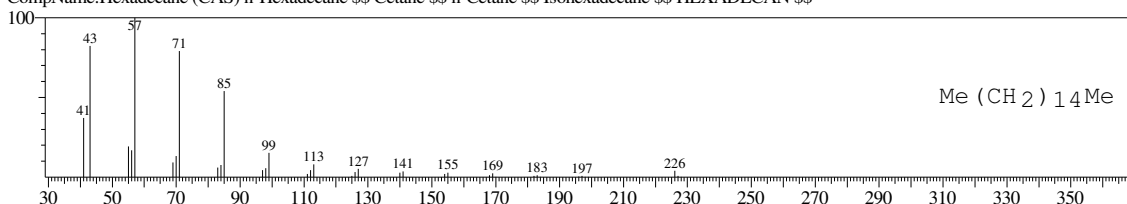

Hit#:5 Entry:162360 Library:WILEY7.LIB

SI:82 Formula:C18 H38 CAS:593-45-3 MolWeight:254 RetIndex:0

CompName:Octadecane (CAS) n-Octadecane \$\$ Octadecan \$\$

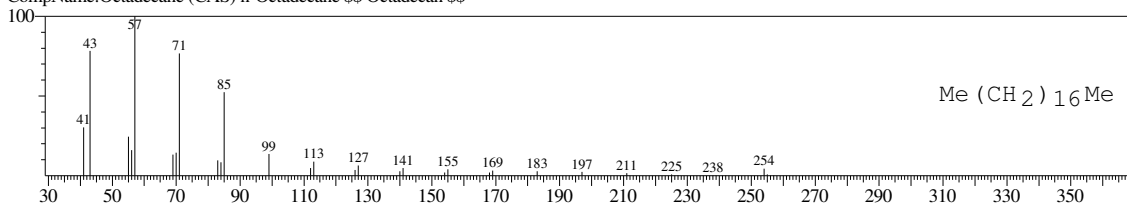

<< Target >>

Line#:42 R.Time:49.310(Scan#:4832) MassPeaks:15

RawMode:Averaged 49.300-49.320(4831-4833) BasePeak:73.05(932)

BG Mode:Calc. from Peak Group 1 - Event 1

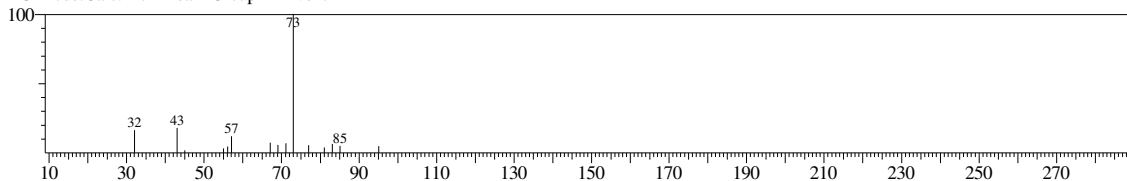

Hit#:1 Entry:195626 Library:WILEY7.LIB

SI:81 Formula:C18 H36 O2 CAS:4360-57-0 MolWeight:284 RetIndex:0

CompName:1,3-Dioxolane, 2-pentadecyl- (CAS) 2-PENTADECYL-1,3-DIOXOLANE \$\$ Hexadecanal cyclic ethylene acetal \$\$ HEXADECANAL ETHY

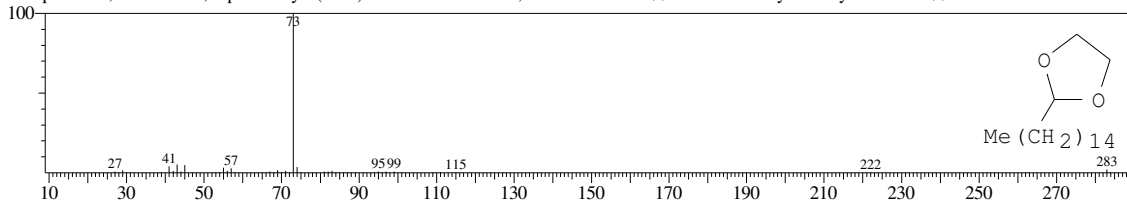

Hit#:2 Entry:79188 Library:WILEY7.LIB

SI:79 Formula:C11 H22 O2 CAS:3613-30-7 MolWeight:186 RetIndex:0

CompName:Octanal, 7-methoxy-3,7-dimethyl- (CAS) Methoxycitronellal \$\$ 7-Methoxy-3,7-dimethyloctanal \$\$ 3,7-Dimethyl-7-methoxy-1-octanal \$\$ 1-O

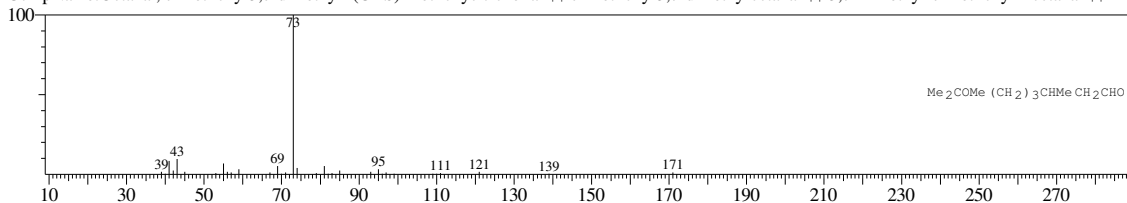

Hit#:3 Entry:65249 Library:WILEY7.LIB

SI:78 Formula:C10 H22 O2 CAS:53273-13-5 MolWeight:174 RetIndex:0

CompName:Hexane, 2,5-dimethoxy-2,5-dimethyl- (CAS) 2,5-Dimethoxy-2,5-dimethylhexane \$\$

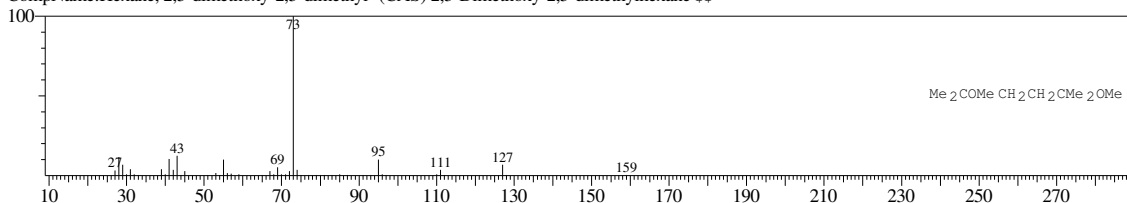

Hit#:4 Entry:22677 Library:WILEY7.LIB

SI:78 Formula:C7 H16 O2 CAS:74421-00-4 MolWeight:132 RetIndex:0

CompName:Butane, 2,3-dimethoxy-2-methyl- (CAS) ETHANE, 1,2-DIMETHOXY-1,1,2-TRIMETHYL- \$\$

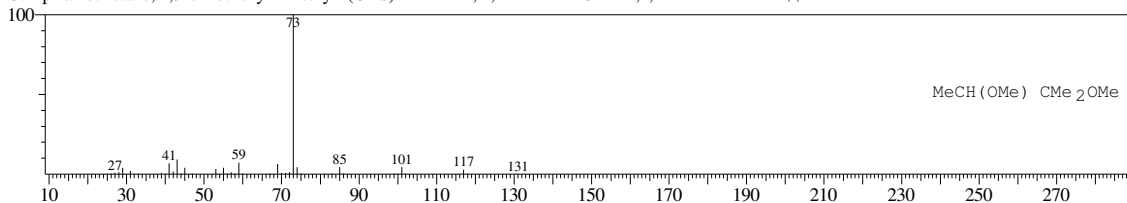

Hit#:5 Entry:131148 Library:WILEY7.LIB

SI:78 Formula:C15 H32 O CAS:7278-65-1 MolWeight:228 RetIndex:0

CompName:3-Dodecanol, 3,7,11-trimethyl- (CAS) Hexahydronerolidol \$\$ Nerolidol, hexahydro- \$\$ 3,7,11-Trimethyldodecan-3-ol \$\$

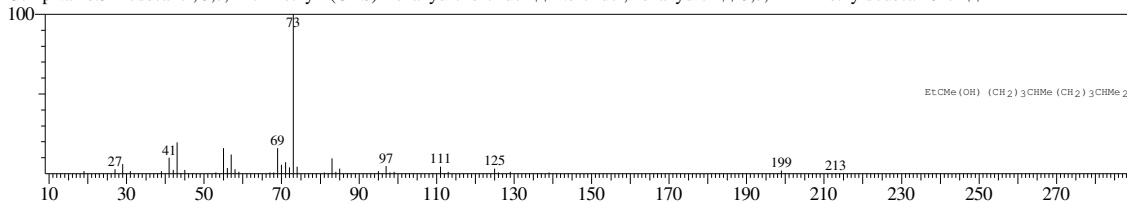

<< Target >>

Line#:43 R.Time:50.780(Scan#:4979) MassPeaks:19

RawMode:Averaged 50.770-50.790(4978-4980) BasePeak:73.05(818)

BG Mode:Calc. from Peak Group 1 - Event 1

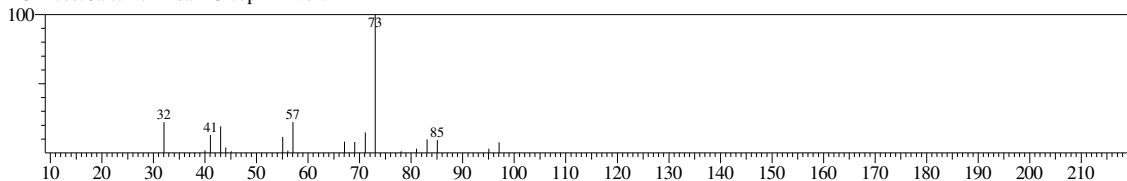

Hit#:1 Entry:131148 Library:WILEY7.LIB

SI:81 Formula:C15 H32 O CAS:7278-65-1 MolWeight:228 RetIndex:0

CompName:3-Dodecanol, 3,7,11-trimethyl- (CAS) Hexahydronerolidol \$\$ Nerolidol, hexahydro- \$\$ 3,7,11-Trimethyldodecan-3-ol \$\$

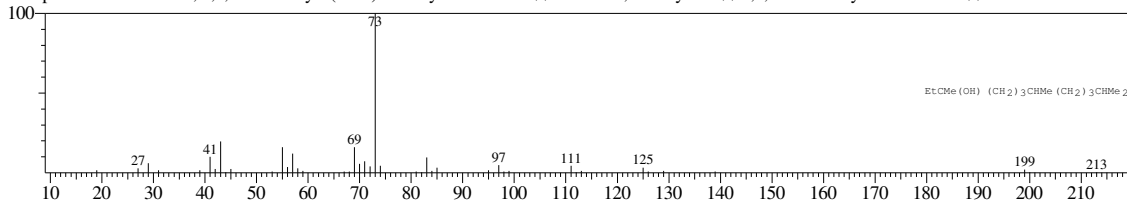

Hit#:2 Entry:32924 Library:WILEY7.LIB

SI:80 Formula:C9 H20 O CAS:62108-41-2 MolWeight:144 RetIndex:0

CompName:Pentane, 2-methoxy-2,4,4-trimethyl- (CAS) Methyl 1,1,3,3-tetramethylbutyl ether \$\$

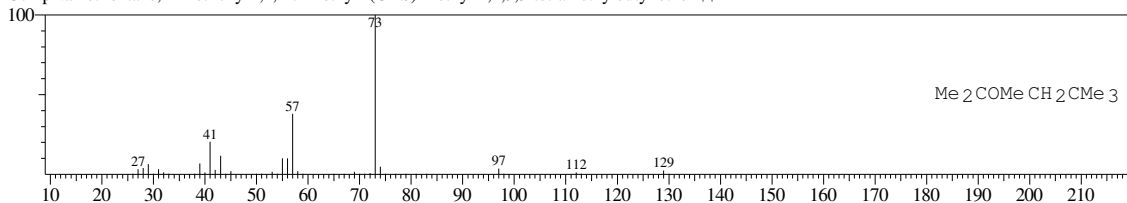

Hit#:3 Entry:65249 Library:WILEY7.LIB

SI:79 Formula:C10 H22 O2 CAS:53273-13-5 MolWeight:174 RetIndex:0

CompName:Hexane, 2,5-dimethoxy-2,5-dimethyl- (CAS) 2,5-Dimethoxy-2,5-dimethylhexane \$\$

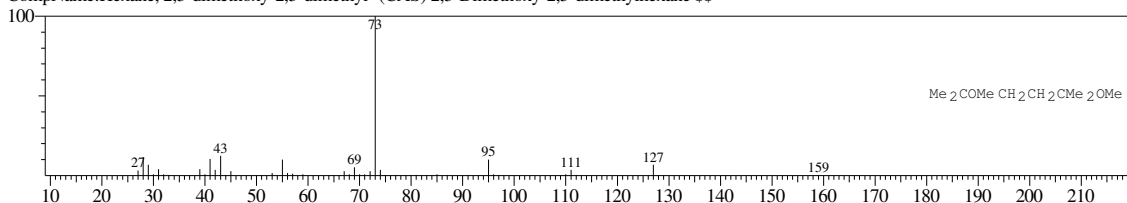

Hit#:4 Entry:22104 Library:WILEY7.LIB

SI:79 Formula:C8 H18 O CAS:27705-21-1 MolWeight:130 RetIndex:0

CompName:Butane, 2-methoxy-2,3,3-trimethyl- (CAS) 2-Methoxy-2,3,3-trimethylbutane \$\$ Ether, methyl 1,1,2,2-tetramethylpropyl \$\$

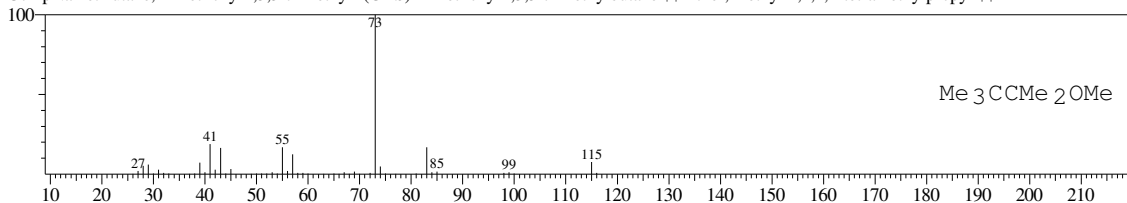

Hit#:5 Entry:79188 Library:WILEY7.LIB

SI:79 Formula:C11 H22 O2 CAS:3613-30-7 MolWeight:186 RetIndex:0

CompName:Octanal, 7-methoxy-3,7-dimethyl- (CAS) Methoxycitronellal \$\$ 7-Methoxy-3,7-dimethyloctanal \$\$ 3,7-Dimethyl-7-methoxy-1-octanal \$\$ 1-O

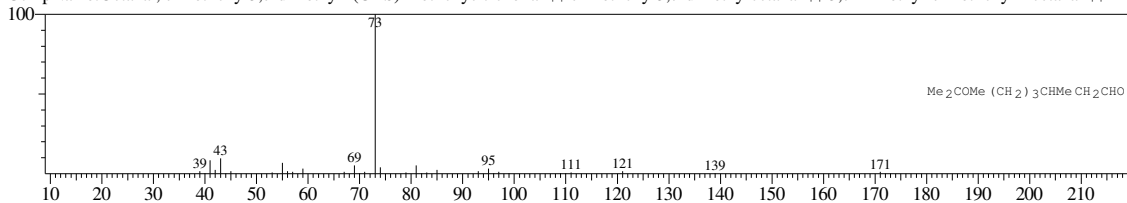

<< Target >>

Line#:44 R.Time:53.840(Scan#:5285) MassPeaks:23

RawMode:Averaged 53.830-53.850(5284-5286) BasePeak:57.05(3463)

BG Mode:Calc. from Peak Group 1 - Event 1

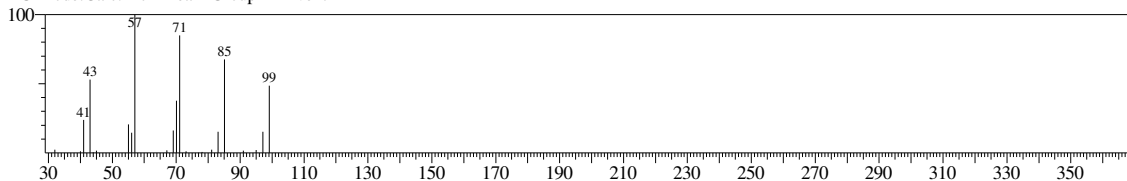

Hit#:1 Entry:261545 Library:WILEY7.LIB

SI:86 Formula:C16 H19 N5 O5 CAS:130138-26-0 MolWeight:361 RetIndex:0

CompName:3',4'-dihydro-2'-(morpholin-4-yl)-5',7'-dinitrospiro[cyclopentane-1,3'-quinazoline] \$\$ Spiro[cyclopentane-1,2'(1'H)-quinoxaline], 3'-(4-morpho

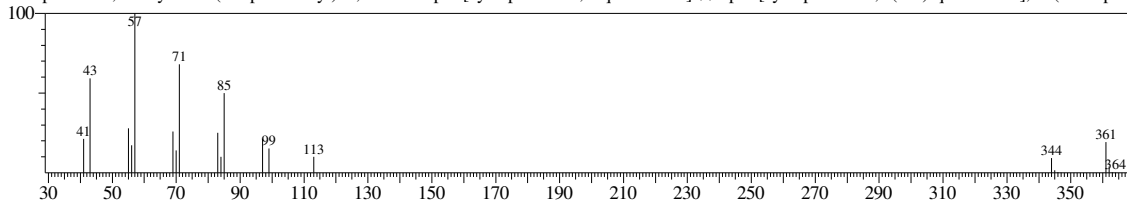

Hit#:2 Entry:245575 Library:WILEY7.LIB

SI:86 Formula:C24 H50 CAS:646-31-1 MolWeight:338 RetIndex:0

CompName:Tetracosane (CAS) n-Tetracosane \$\$

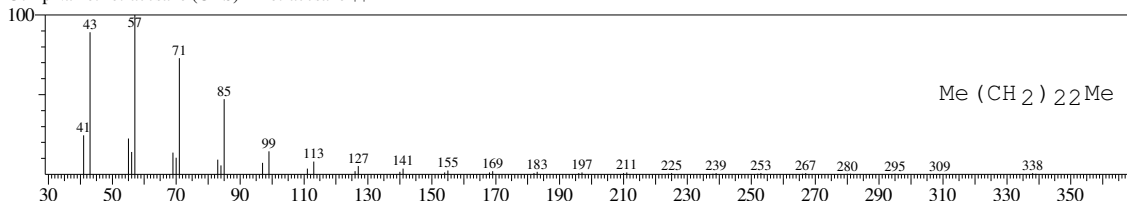

Hit#:3 Entry:129211 Library:WILEY7.LIB

SI:85 Formula:C16 H34 CAS:544-76-3 MolWeight:226 RetIndex:0

CompName:Hexadecane (CAS) n-Hexadecane \$\$ Cetane \$\$ n-Cetane \$\$ Isohexadecane \$\$ HEXADECAN \$\$

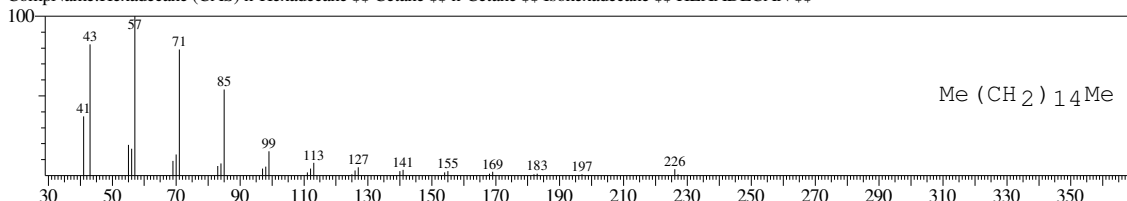

Hit#:4 Entry:207678 Library:WILEY7.LIB

SI:85 Formula:C21 H44 CAS:54833-48-6 MolWeight:296 RetIndex:0

CompName:Heptadecane, 2,6,10,15-tetramethyl- (CAS) 2,6,10,15-TETRAMETHYLHEPTADECANE \$\$

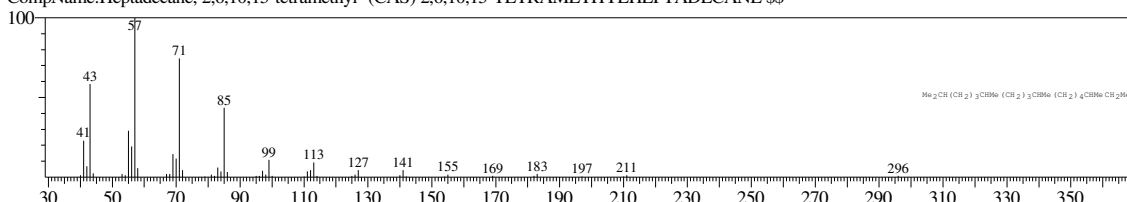

Hit#:5 Entry:162360 Library:WILEY7.LIB

SI:84 Formula:C18 H38 CAS:593-45-3 MolWeight:254 RetIndex:0

CompName:Octadecane (CAS) n-Octadecane \$\$ Octadecan \$\$

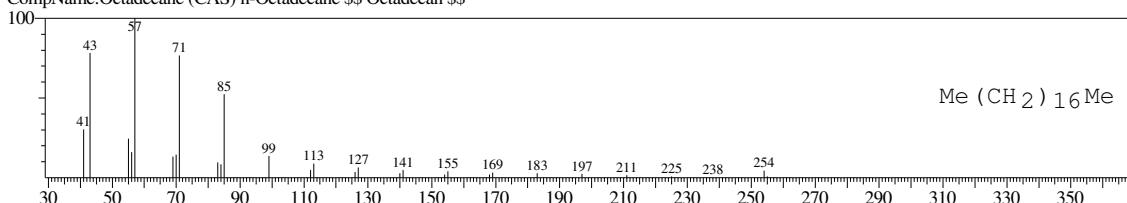

Supplement: f1 [file 3092246.f1.zip › 3092246.f1/flavoured mushroom.pdf]
