# Supplementary material for: Panelist Acceptance, Proximate Characteristics of Amino Acids and Volatile Compounds, and Color Profile of Fermented Cempedak (Artocarpus champeden) and Oyster Mushroom (Pleurotus ostreatus) Seasoning
Source: Hindawi journal article supplement (doi:10.1155/2022/3092246), 2022-07-07

Sample Information

Analyzed by :Laboratorium Biosain  
Sample Type : B. Jamur  
Level # : 1  
Sample Name : B. Jamur  
Sample ID : B. Jamur  
IS Amount : [1]=1.000  
Sample Amount : 1.000  
Dilution Factor : 1.000  
Vial # : 1  
Injection Volume : 1.000  
Data File : C:\GCMSsolution\Data\Project1\analisa volatil\B. Jamur.qgd  
Org Data File : C:\GCMSsolution\Data\Project1\analisa volatil\B. Jamur.qgd  
Tuning File : C:\GCMSsolution\System\Tune1\novita 05042021.qgt  
Modified by : Admin

Method

[Comment]

===== Analytical Line 1 =====

[GC-2010]  
Column Oven Temp. :60.0 °C  
Injection Temp. :260.00 °C  
Injection Mode :Splitless  
Sampling Time :1.00 min  
Flow Control Mode :Pressure  
Pressure :38.9 kPa  
Total Flow :37.5 mL/min  
Column Flow :0.78 mL/min  
Linear Velocity :32.2 cm/sec  
Purge Flow :3.0 mL/min  
Split Ratio :-1.0  
High Pressure Injection :OFF  
Carrier Gas Saver :OFF  
Oven Temp. Program  
Rate Temperature(°C) Hold Time(min)  
- 60.0 3.00  
5.00 220.0 20.00

< Ready Check Heat Unit >  
Column Oven : Yes  
SPL1 : Yes  
MS : Yes  
< Ready Check Detector(FTD) >  
< Ready Check Baseline Drift >  
< Ready Check Injection Flow >  
SPL1 Carrier : Yes  
SPL1 Purge : Yes  
< Ready Check APC Flow >  
< Ready Check Detector APC Flow >  
External Wait :No  
Equilibrium Time :3.0 min

[GC Program]

[GCMS-QP2010 Plus]  
IonSourceTemp :200.00 °C  
Interface Temp. :200.00 °C  
Solvent Cut Time :1.00 min  
Detector Gain Mode :Relative  
Detector Gain :0.00 kV  
Threshold :1000

[MS Table]  
--Group 1 - Event 1--  
Start Time :1.00min  
End Time :55.00min  
ACQ Mode :Scan  
Event Time :0.60sec  
Scan Speed : 555  
Start m/z :30.00  
End m/z :350.00

Sample Inlet Unit :GC

[MS Program]  
Use MS Program :OFF

## Chromatogram B. Jamur

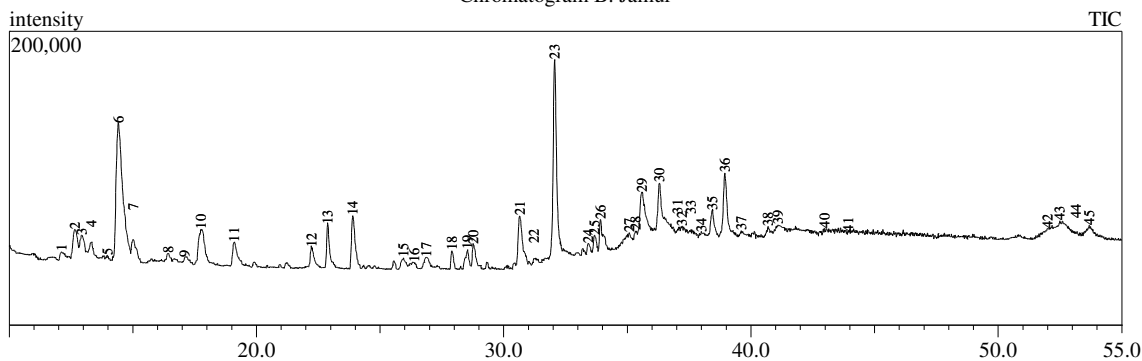

| Peak Report TIC |        |          |        |        |                                                    |
|-----------------|--------|----------|--------|--------|----------------------------------------------------|
| Peak#           | R.Time | Area     | Area%  | Height | Height% Name                                       |
| 1               | 12.121 | 76003    | 0.66   | 5597   | 0.69 .beta.,D-Xylopyranose Tetrabenzoate           |
| 2               | 12.661 | 290834   | 2.53   | 20867  | 2.56 Ethane, 1,1'-oxybis[2-ethoxy- (CAS) Bis(2-eth |
| 3               | 12.936 | 239924   | 2.08   | 17075  | 2.10 Butanoic acid, 4-chloro-                      |
| 4               | 13.327 | 173236   | 1.50   | 12414  | 1.52 1-Pentanol, 3-methyl- (CAS) 3-Methyl-1-pent   |
| 5               | 13.979 | 58270    | 0.51   | 3552   | 0.44 Ethanedial, monohydrate, dimer (CAS) GLYC     |
| 6               | 14.420 | 1786148  | 15.51  | 93965  | 11.54 6-METHYL-5-HEPTEN-2-ONE                      |
| 7               | 15.021 | 210401   | 1.83   | 15357  | 1.89 2,5-Furandione (CAS) Maleic anhydride         |
| 8               | 16.440 | 54401    | 0.47   | 5410   | 0.66 2H-Pyran, 2-butoxytetrahydro- (CAS) N-BUT     |
| 9               | 17.100 | 53094    | 0.46   | 3558   | 0.44 4-Benzyloxy-1-bromobutane                     |
| 10              | 17.765 | 393221   | 3.41   | 23327  | 2.86 Guanidine, methyl-, hydrochloride (CAS) N-M   |
| 11              | 19.103 | 227821   | 1.98   | 16309  | 2.00 Oxetane, 2-propyl- (CAS) 2-N-PROPYL-OXI       |
| 12              | 22.226 | 143465   | 1.25   | 13192  | 1.62 .beta.-Myrcene                                |
| 13              | 22.886 | 254081   | 2.21   | 30007  | 3.68 2-Propenamide, 2-methyl-N-phenyl-             |
| 14              | 23.902 | 380357   | 3.30   | 35973  | 4.42 1-Dodecanol (CAS) n-Dodecanol                 |
| 15              | 25.948 | 97280    | 0.84   | 7149   | 0.88 Azetidine, 1-nitroso- (CAS) Nitrosoazetidine  |
| 16              | 26.380 | 74524    | 0.65   | 4236   | 0.52 2H-Pyran-3,4-dihydro-2-carboxamide            |
| 17              | 26.876 | 100933   | 0.88   | 7089   | 0.87 Tridecanoic acid (CAS) Tridecyl acid          |
| 18              | 27.913 | 91458    | 0.79   | 12238  | 1.50 Bis-[3-oxo-6'-diethylamino-spiro(phthalan-1,9 |
| 19              | 28.539 | 133328   | 1.16   | 12819  | 1.57 2H-Pyran-2-one, tetrahydro-6-pentyl- (CAS) 5  |
| 20              | 28.783 | 160435   | 1.39   | 16835  | 2.07 1-Heptadecanol (CAS) n-Heptadecanol           |
| 21              | 30.652 | 442348   | 3.84   | 34520  | 4.24 Acetamide, N-(2-phenylethyl)- (CAS) N-(2-PI   |
| 22              | 31.220 | 48021    | 0.42   | 4026   | 0.49 7.ALPHA.-METHACRYLOYLOXY- OR -TI              |
| 23              | 32.065 | 1263852  | 10.97  | 132538 | 16.28 1-Hexacosanol (CAS) HEXACOSANOL-1            |
| 24              | 33.430 | 59041    | 0.51   | 7191   | 0.88 1-(3-(morpholin-4-yl)propyl)cyclopentanol     |
| 25              | 33.682 | 101591   | 0.88   | 11935  | 1.47 2-Propenamide, N-[2-(dimethylamino)ethyl]-    |
| 26              | 33.920 | 233754   | 2.03   | 21990  | 2.70 Nonanoic acid, 7-methyl-, methyl ester (CAS)  |
| 27              | 35.081 | 154526   | 1.34   | 8508   | 1.04 9-Octadecenoic acid (Z)- (CAS) Oleic acid     |
| 28              | 35.340 | 81861    | 0.71   | 9394   | 1.15 BICYCLO(3.3.1)NONAN-1-OL                      |
| 29              | 35.597 | 668639   | 5.81   | 35574  | 4.37 Octadecanoic acid (CAS) Stearic acid          |
| 30              | 36.304 | 954681   | 8.29   | 40907  | 5.02 2-Heptanol, 5-ethyl- (CAS) 5-Ethyl-2-heptano  |
| 31              | 37.040 | 90664    | 0.79   | 8458   | 1.04 3R*,4R*)-3,4-DIMETHYL-1-BUTYN-4-OL            |
| 32              | 37.222 | 164338   | 1.43   | 10718  | 1.32 6-(Allyloxy)hexane-1,2-diol                   |
| 33              | 37.580 | 131148   | 1.14   | 7503   | 0.92 2-Pyrazoline, 1-butyl-5-methyl- (CAS) 5-Metl  |
| 34              | 38.004 | 103493   | 0.90   | 5867   | 0.72 MORPHOLINE, 4-OCTADECYL-                      |
| 35              | 38.442 | 253681   | 2.20   | 20127  | 2.47 METHYLESTER OF 3-CYCLOHEXYL-PR                |
| 36              | 38.951 | 566150   | 4.92   | 44151  | 5.42 Bombykol                                      |
| 37              | 39.615 | 67844    | 0.59   | 4935   | 0.61 Propane, 2-chloro-2-methyl- (CAS) tert-Butyl  |
| 38              | 40.695 | 54052    | 0.47   | 6636   | 0.81 4-Methylchloride-hex-4-ene-1-ol               |
| 39              | 41.104 | 146023   | 1.27   | 5913   | 0.73 Cyclohexanepropanoic acid (CAS) 3-Cyclohe     |
| 40              | 42.977 | 49332    | 0.43   | 3984   | 0.49 1-vinyl-1-cyclopropyl methyl ether            |
| 41              | 43.940 | 55889    | 0.49   | 1823   | 0.22 1-Thymine-2-deoxy-.beta.-D-ribofuranos-5-yl   |
| 42              | 52.000 | 264883   | 2.30   | 6150   | 0.76 Citronellyl isobutyrate                       |
| 43              | 52.501 | 280952   | 2.44   | 11536  | 1.42 Bicyclo[2.2.2]octan-1-ol (CAS) 1-Hydroxybic   |
| 44              | 53.160 | 65245    | 0.57   | 4002   | 0.49 2-[[5-Methyl-1-(1-methylethenyl)-5-hexenylo   |
| 45              | 53.683 | 215687   | 1.87   | 8952   | 1.10 2H-Pyran-2-methanol, tetrahydro- (CAS) 2-M    |
|                 |        | 11516909 | 100.00 | 814307 | 100.00                                             |

Library

<< Target >>

Line#:1 R.Time:12.120(Scan#:1113) MassPeaks:5

RawMode:Averaged 12.110-12.130(1112-1114) BasePeak:77.00(1877)

BG Mode:Calc. from Peak Group 1 - Event 1

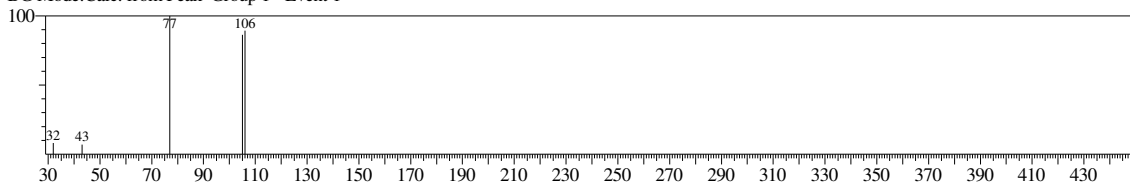

Hit#1 Entry:326663 Library:WILEY7.LIB

SI:91 Formula:C33 H34 O9 CAS:0-00-0 MolWeight:574 RetIndex:0

CompName:.beta.,D-Xylopyranose Tetrabenzoate \$\$

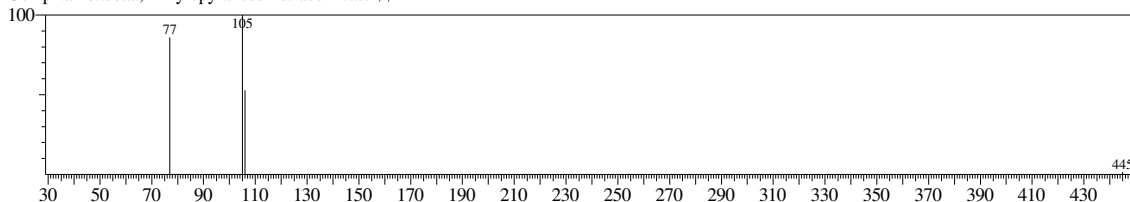

Hit#2 Entry:27810 Library:WILEY7.LIB

SI:90 Formula:C8 H7 F O CAS:450-95-3 MolWeight:138 RetIndex:0

CompName:.alpha.-Fluoroacetophenone \$\$ phenyl-fluoromethylketone \$\$ Ethanone, 2-fluoro-1-phenyl- (CAS) Acetophenone, 2-fluoro- (CAS) 2-Fluoroac

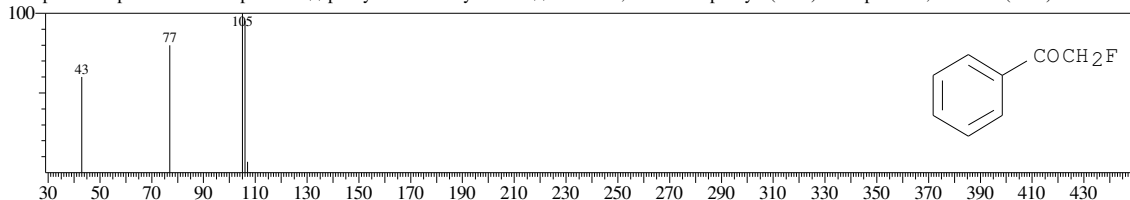

Hit#3 Entry:297217 Library:WILEY7.LIB

SI:89 Formula:C25 H23 N3 O4 CAS:90587-90-9 MolWeight:429 RetIndex:0

CompName:4-(3-Hydroxy-5-hydroxymethyl-2-methylpyridin-4-yl)-6,8-dioxo-2,7-diphenyl-3,7-diazabicyclo[3.3.0]octane \$\$ Pyrrolo[3,4-c]pyrrole-1,3(2H,2

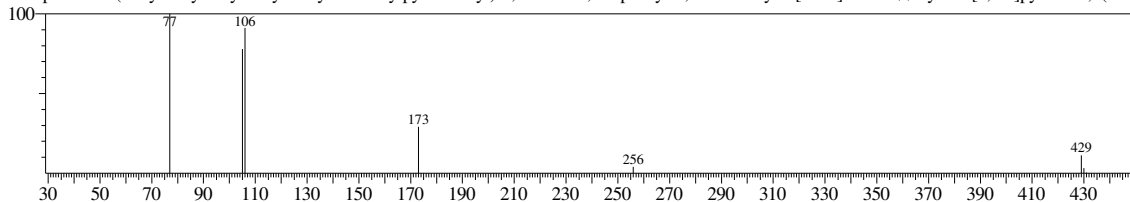

Hit#4 Entry:8870 Library:WILEY7.LIB

SI:88 Formula:C7 H6 O CAS:100-52-7 MolWeight:106 RetIndex:0

CompName:Benzaldehyde (CAS) Phenylmethanal \$\$ Benzenecarbonal \$\$ Benzaldehyde FFC \$\$ Benzoic aldehyde \$\$ Artificial Almond Oil \$\$ Benzeneca

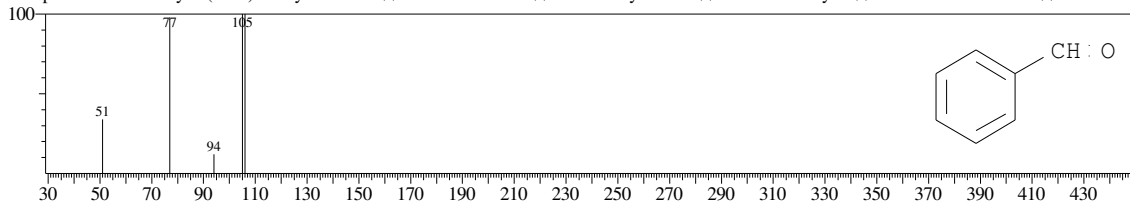

Hit#5 Entry:325576 Library:WILEY7.LIB

SI:86 Formula:C33 H25 N O8 CAS:20744-60-9 MolWeight:563 RetIndex:0

CompName:Tetra-O-benzoyl-D-arabinonitrile \$\$

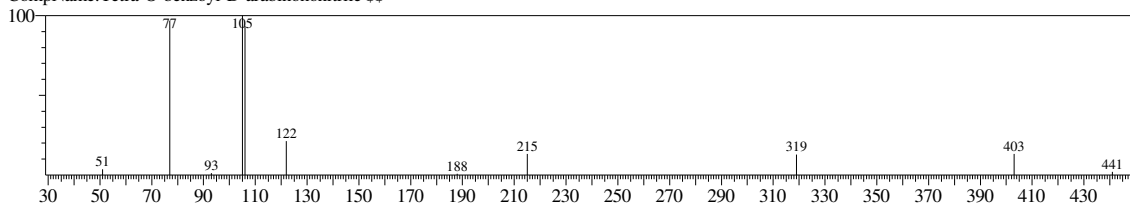

<< Target >>

Line#:2 R.Time:12.660(Scan#:1167) MassPeaks:14

RawMode:Averaged 12.650-12.670(1166-1168) BasePeak:45.05(2815)

BG Mode:Calc. from Peak Group 1 - Event 1

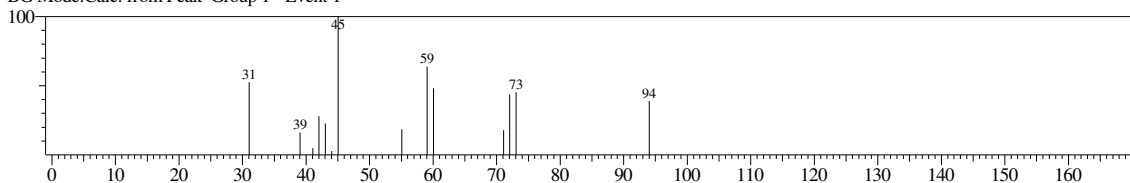

Hit#1 Entry:51453 Library:WILEY7.LIB

SI:82 Formula:C8 H18 O3 CAS:112-36-7 MolWeight:162 RetIndex:0

CompName:Ethane, 1,1'-oxybis[2-ethoxy- (CAS) Bis(2-ethoxyethyl) ether \$ Diethyl carbitol \$ 3,6,9-Trioxaundecane \$ Diethyldiethylene glycol \$ Ethe

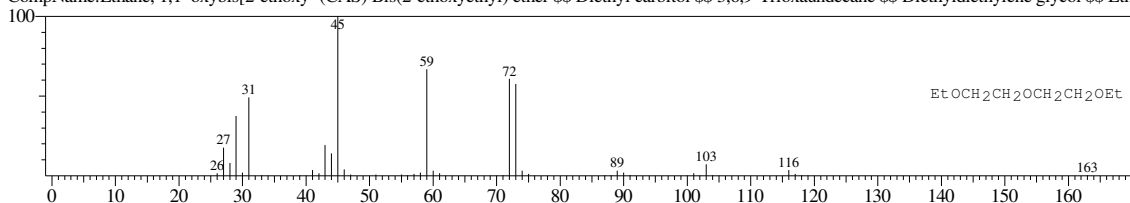

Hit#2 Entry:51451 Library:WILEY7.LIB

SI:80 Formula:C8 H18 O3 CAS:112-36-7 MolWeight:162 RetIndex:0

CompName:Ethane, 1,1'-oxybis[2-ethoxy- (CAS) Bis(2-ethoxyethyl) ether \$ Diethyl carbitol \$ 3,6,9-Trioxaundecane \$ Diethyldiethylene glycol \$ Ethe

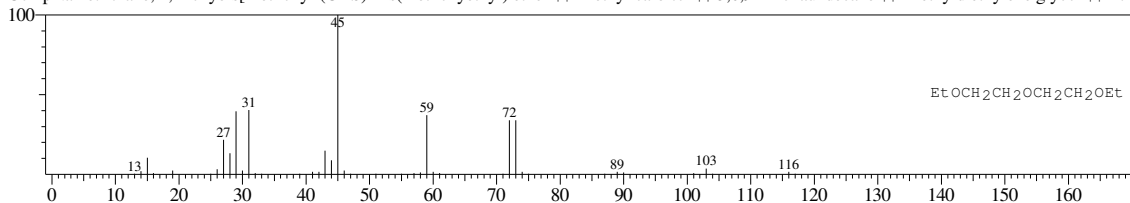

Hit#3 Entry:35811 Library:WILEY7.LIB

SI:80 Formula:C7 H16 O3 CAS:0-00-0 MolWeight:148 RetIndex:0

CompName:1-(Ethoxyethoxy)-2-propanol \$

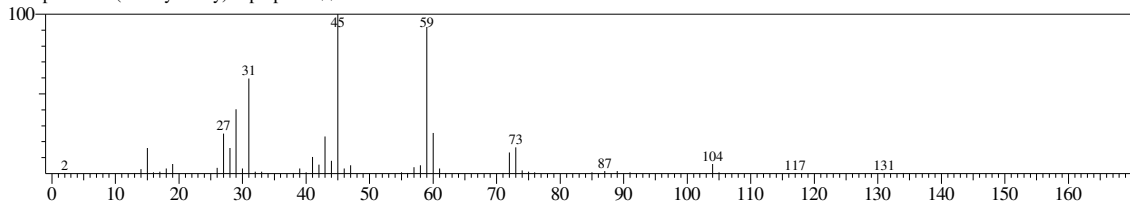

Hit#4 Entry:51450 Library:WILEY7.LIB

SI:80 Formula:C8 H18 O3 CAS:112-36-7 MolWeight:162 RetIndex:0

CompName:Ethane, 1,1'-oxybis[2-ethoxy- (CAS) Bis(2-ethoxyethyl) ether \$ Diethyl carbitol \$ 3,6,9-Trioxaundecane \$ Diethyldiethylene glycol \$ Ethe

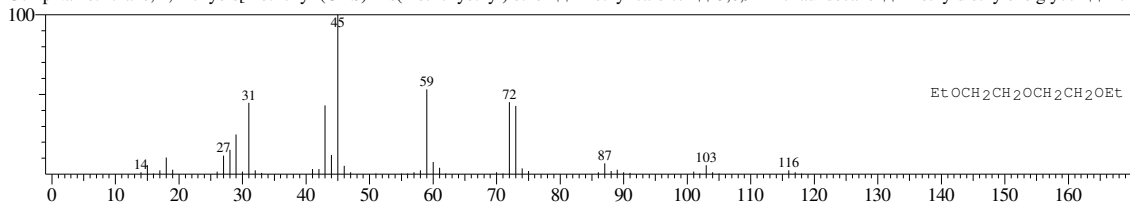

Hit#5 Entry:35815 Library:WILEY7.LIB

SI:80 Formula:C7 H16 O3 CAS:0-00-0 MolWeight:148 RetIndex:0

CompName:3,3-Diethoxypropanol \$

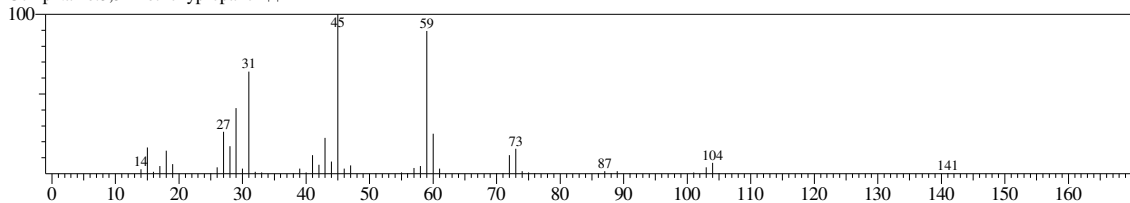

<< Target >>

Line#:3 R.Time:12.940(Scan#:1195) MassPeaks:9

RawMode:Averaged 12.930-12.950(1194-1196) BasePeak:42.10(3091)

BG Mode:Calc. from Peak Group 1 - Event 1

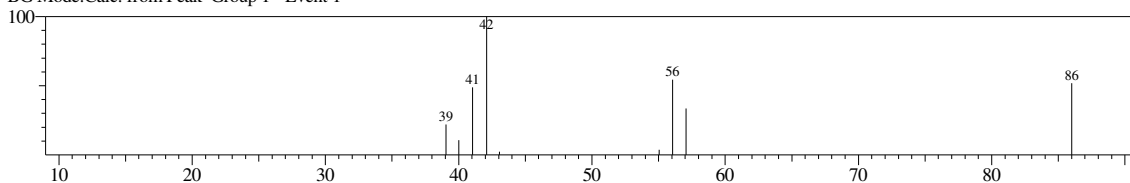

Hit#1 Entry:15907 Library:WILEY7.LIB

SI:91 Formula:C4 H7 Cl O2 CAS:627-00-9 MolWeight:122 RetIndex:0

CompName:Butanoic acid, 4-chloro- \$\$ Butyric acid, 4-chloro- \$\$ .gamma.-Chlorobutyric acid \$\$ Gammachlorobutyric acid \$\$ 4-Chlorobutanoic acid \$\$ 4

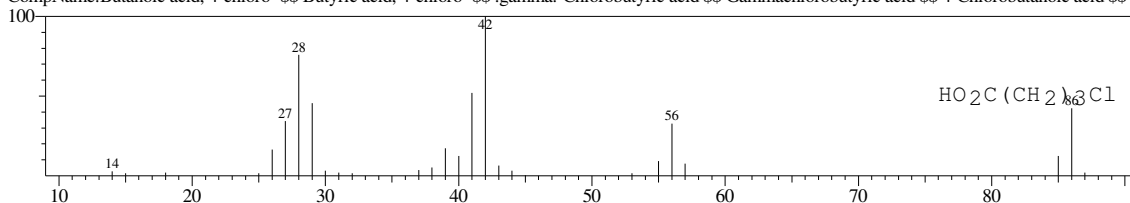

Hit#2 Entry:3295 Library:WILEY7.LIB

SI:91 Formula:C4 H6 O2 CAS:96-48-0 MolWeight:86 RetIndex:0

CompName:2(3H)-Furanone, dihydro- (CAS) Butyrolactone \$\$ 6480 \$\$ .gamma.-Butyrolactone \$\$ .gamma.-BL \$\$ 4-Butanolide \$\$ 1,4-Butanolide \$\$ 4-But

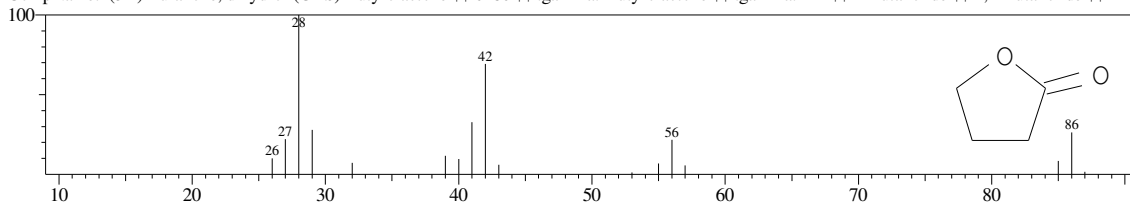

Hit#3 Entry:3284 Library:WILEY7.LIB

SI:90 Formula:C4 H6 O2 CAS:96-48-0 MolWeight:86 RetIndex:0

CompName:2(3H)-Furanone, dihydro- (CAS) Butyrolactone \$\$ 6480 \$\$ .gamma.-Butyrolactone \$\$ .gamma.-BL \$\$ 4-Butanolide \$\$ 1,4-Butanolide \$\$ 4-But

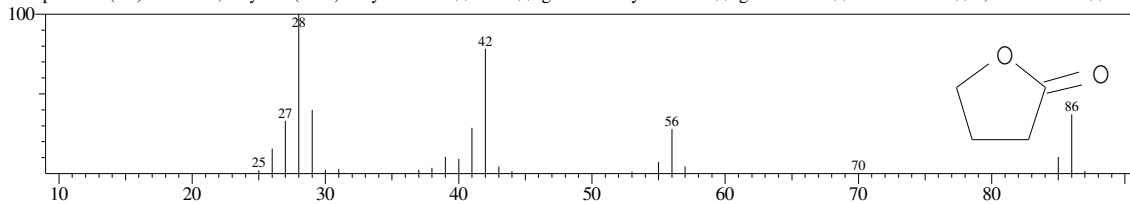

Hit#4 Entry:3285 Library:WILEY7.LIB

SI:89 Formula:C4 H6 O2 CAS:96-48-0 MolWeight:86 RetIndex:0

CompName:2(3H)-Furanone, dihydro- (CAS) Butyrolactone \$\$ 6480 \$\$ .gamma.-Butyrolactone \$\$ .gamma.-BL \$\$ 4-Butanolide \$\$ 1,4-Butanolide \$\$ 4-But

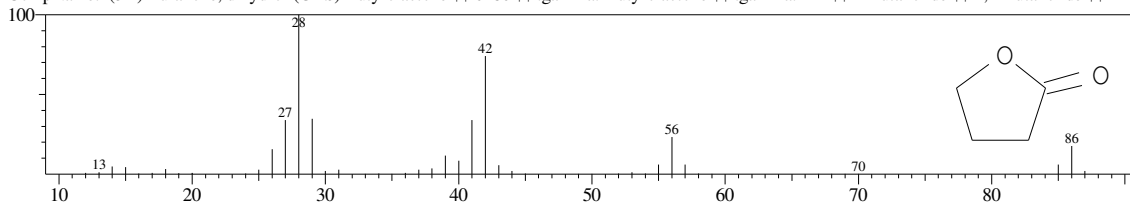

Hit#5 Entry:3292 Library:WILEY7.LIB

SI:89 Formula:C4 H6 O2 CAS:96-48-0 MolWeight:86 RetIndex:0

CompName:2(3H)-Furanone, dihydro- (CAS) Butyrolactone \$\$ 6480 \$\$ .gamma.-Butyrolactone \$\$ .gamma.-BL \$\$ 4-Butanolide \$\$ 1,4-Butanolide \$\$ 4-But

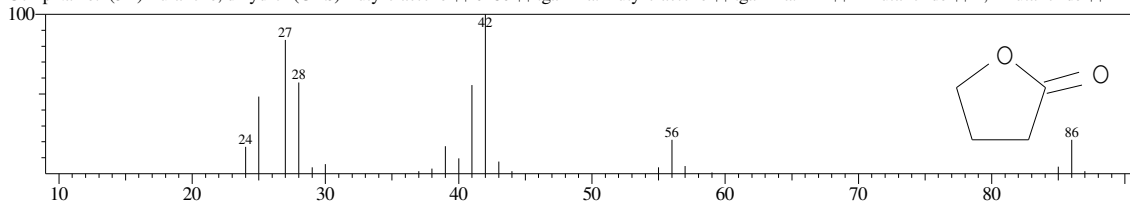

<< Target >>

Line#:4 R.Time:13.330(Scan#:1234) MassPeaks:10

RawMode:Averaged 13.320-13.340(1233-1235) BasePeak:56.05(1376)

BG Mode:Calc. from Peak Group 1 - Event 1

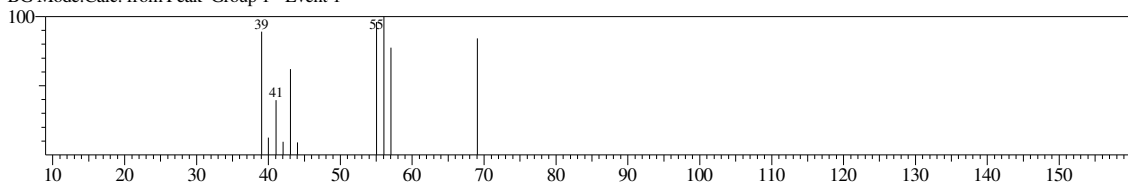

Hit#:1 Entry:7984 Library:WILEY7.LIB

SI:84 Formula:C6 H14 O CAS:589-35-5 MolWeight:102 RetIndex:0

CompName:1-Pentanol, 3-methyl- (CAS) 3-Methyl-1-pentanol \$\$ 3-Methylpentanol \$\$ 2-Ethyl-4-butanol \$\$ 3-Ethyl-1-butanol \$\$ 3-methyl 1-pentanol \$\$ :

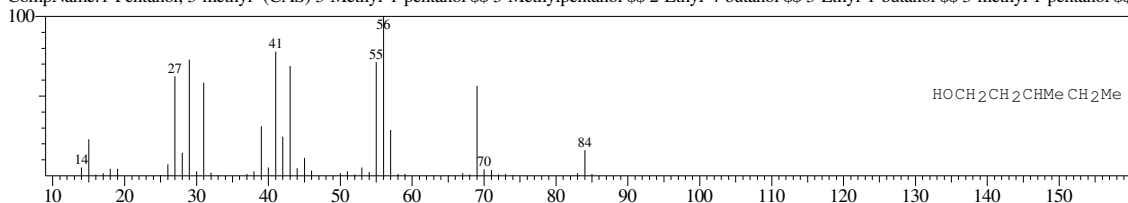

Hit#:2 Entry:7988 Library:WILEY7.LIB

SI:83 Formula:C6 H14 O CAS:589-35-5 MolWeight:102 RetIndex:0

CompName:1-Pentanol, 3-methyl- (CAS) 3-Methyl-1-pentanol \$\$ 3-Methylpentanol \$\$ 2-Ethyl-4-butanol \$\$ 3-Ethyl-1-butanol \$\$ 3-methyl 1-pentanol \$\$ :

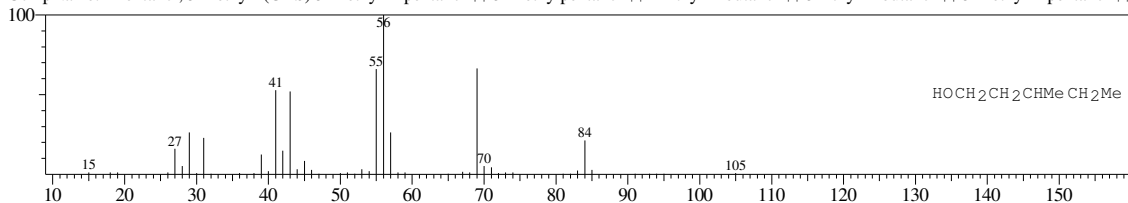

Hit#:3 Entry:10931 Library:WILEY7.LIB

SI:82 Formula:C8 H16 CAS:5026-76-6 MolWeight:112 RetIndex:0

CompName:1-Heptene, 6-methyl- (CAS) 6-Methyl-1-heptene \$\$

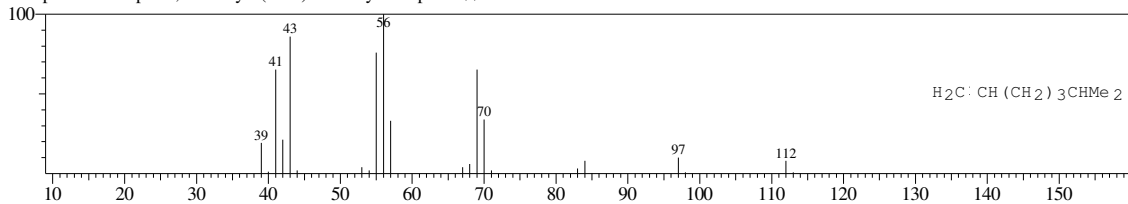

Hit#:4 Entry:43185 Library:WILEY7.LIB

SI:82 Formula:C11 H22 CAS:74630-24-3 MolWeight:154 RetIndex:0

CompName:2-Decene, 9-methyl-, (Z)- (CAS)

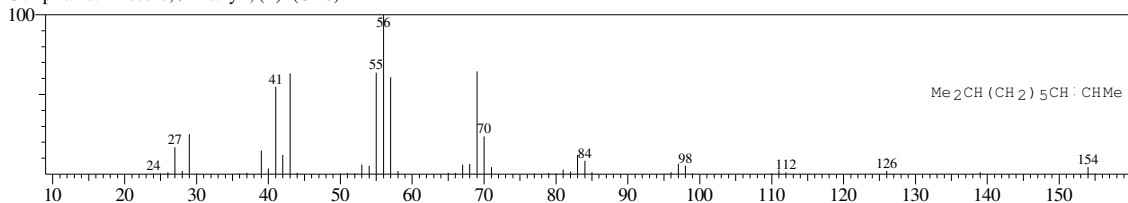

Hit#:5 Entry:7986 Library:WILEY7.LIB

SI:82 Formula:C6 H14 O CAS:589-35-5 MolWeight:102 RetIndex:0

CompName:1-Pentanol, 3-methyl- (CAS) 3-Methyl-1-pentanol \$\$ 3-Methylpentanol \$\$ 2-Ethyl-4-butanol \$\$ 3-Ethyl-1-butanol \$\$ 3-methyl 1-pentanol \$\$ :

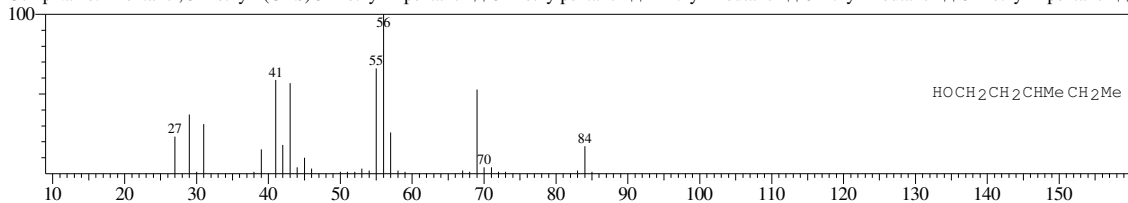

<< Target >>

Line#:5 R.Time:13.980(Scan#:1299) MassPeaks:6

RawMode:Averaged 13.970-13.990(1298-1300) BasePeak:30.05(1141)

BG Mode:Calc. from Peak Group 1 - Event 1

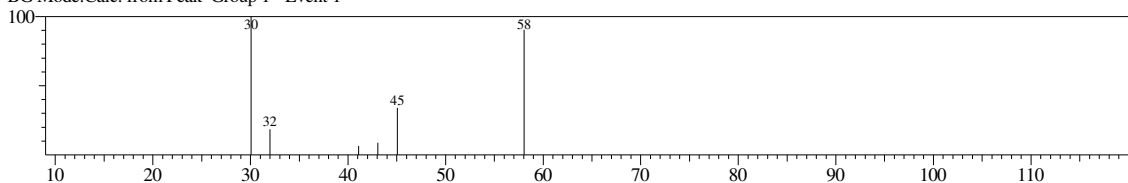

Hit#:1 Entry:39468 Library:WILEY7.LIB

SI:84 Formula:C4 H8 O6 CAS:55682-62-7 MolWeight:152 RetIndex:0

CompName:Ethanedial, monohydrate, dimer (CAS) GLYOXAL MONOHYDRATE DIMER \$\$

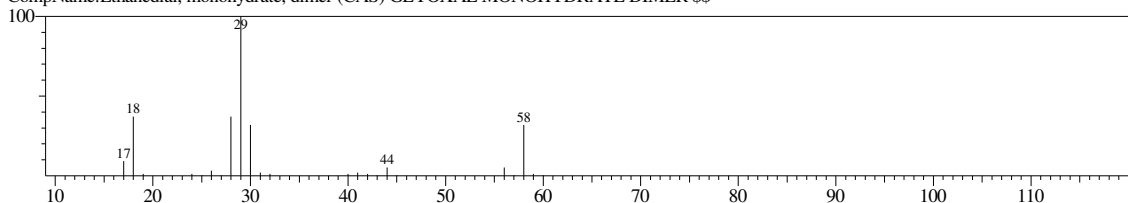

Hit#:2 Entry:4273 Library:WILEY7.LIB

SI:80 Formula:C4 H11 N O CAS:110-73-6 MolWeight:89 RetIndex:0

CompName:2-Ethylaminoethanol \$\$ Ethanol, 2-(ethylamino)- (CAS) Ethylethanolamine \$\$ (2-Hydroxyethyl)ethylamine \$\$ Ethyl-2-hydroxyethylamine \$\$

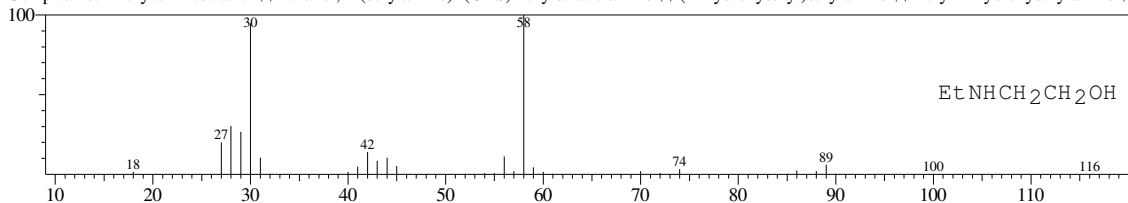

Hit#:3 Entry:4270 Library:WILEY7.LIB

SI:78 Formula:C4 H11 N O CAS:110-73-6 MolWeight:89 RetIndex:0

CompName:2-Ethylaminoethanol \$\$ Ethanol, 2-(ethylamino)- (CAS) Ethylethanolamine \$\$ (2-Hydroxyethyl)ethylamine \$\$ Ethyl-2-hydroxyethylamine \$\$

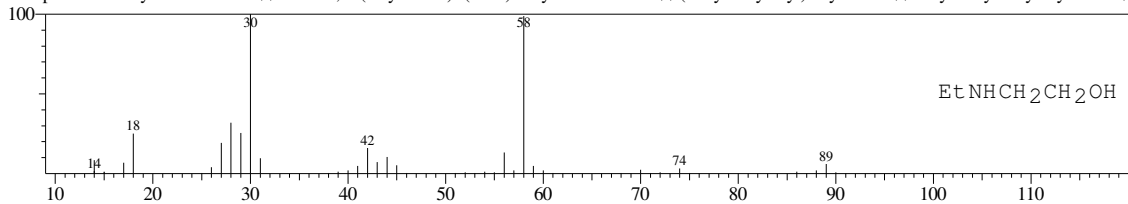

Hit#:4 Entry:1599 Library:WILEY7.LIB

SI:77 Formula:C4 H11 N CAS:109-89-7 MolWeight:73 RetIndex:0

CompName:Ethanamine, N-ethyl- (CAS) Diethylamine \$\$ N-ETHYL-ETHANEAMINE \$\$ N,N-Diethylamine \$\$ N-Ethylethanamine \$\$

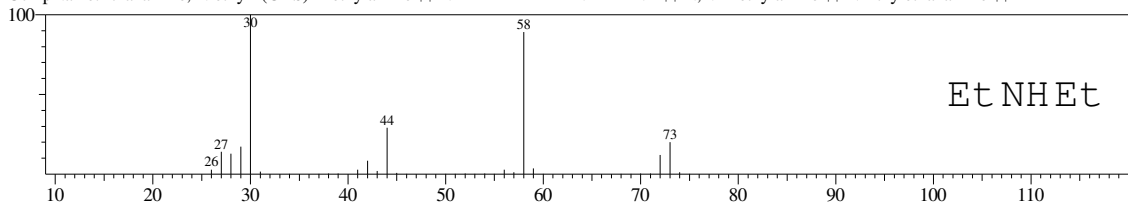

Hit#:5 Entry:434 Library:WILEY7.LIB

SI:77 Formula:C2 H3 N O CAS:107-16-4 MolWeight:57 RetIndex:0

CompName:Acetonitrile, hydroxy- (CAS) Glycolonitrile \$\$ Glyconitrile \$\$ Cyanomethanol \$\$ Glycolic nitrile \$\$ Hydroxyactonitrile \$\$ Hydroxyacetonitrile

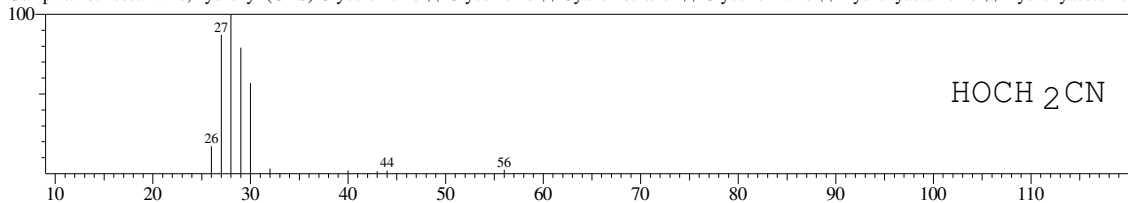

<< Target >>

Line#:6 R.Time:14.420(Scan#:1343) MassPeaks:31

RawMode:Averaged 14.410-14.430(1342-1344) BasePeak:108.05(12048)

BG Mode:Calc. from Peak Group 1 - Event 1

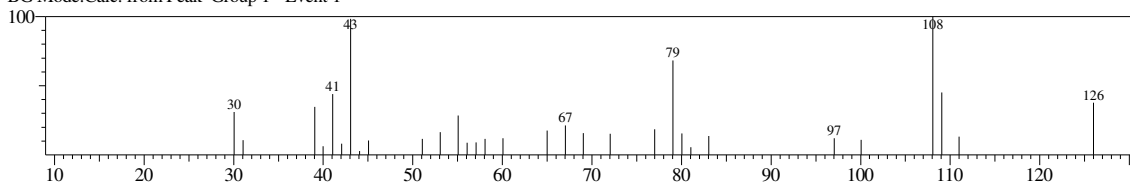

Hit#:1 Entry:18402 Library:WILEY7.LIB

SI:74 Formula:C<sub>8</sub>H<sub>14</sub>O CAS:110-93-0 MolWeight:126 RetIndex:0

CompName:6-METHYL-5-HEPTEN-2-ONE \$\$

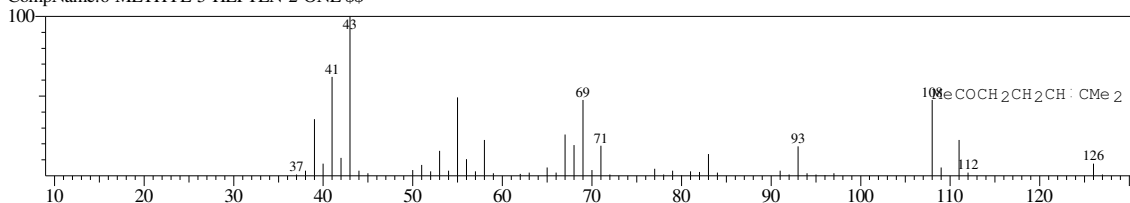

Hit#:2 Entry:18888 Library:WILEY7.LIB

SI:73 Formula:C<sub>8</sub>H<sub>14</sub>O CAS:110-93-0 MolWeight:126 RetIndex:0

CompName:6-Methyl-5-hepten-2-one \$\$ 5-Hepten-2-one, 6-methyl- (CAS) 6-Methyl-5-heptene-2-one \$\$ 6-METHYLHEPT-5-EN-2-ONE \$\$ (6-methyl)-E

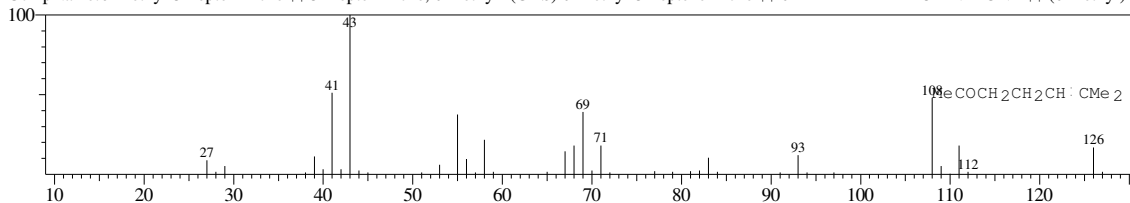

Hit#:3 Entry:18889 Library:WILEY7.LIB

SI:73 Formula:C<sub>8</sub>H<sub>14</sub>O CAS:110-93-0 MolWeight:126 RetIndex:0

CompName:6-Methyl-5-hepten-2-one \$\$ 5-Hepten-2-one, 6-methyl- (CAS) 6-Methyl-5-heptene-2-one \$\$ 6-METHYLHEPT-5-EN-2-ONE \$\$ (6-methyl)-E

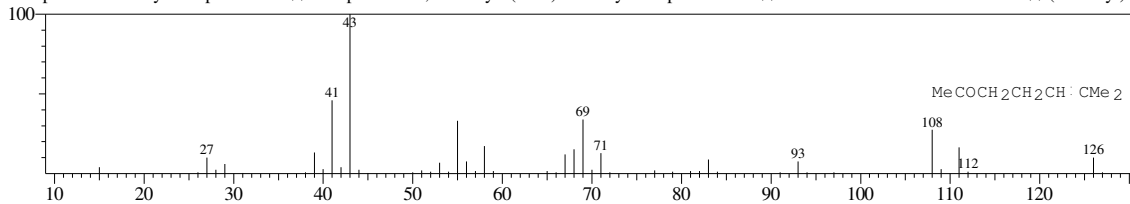

Hit#:4 Entry:18892 Library:WILEY7.LIB

SI:72 Formula:C<sub>8</sub>H<sub>14</sub>O CAS:110-93-0 MolWeight:126 RetIndex:0

CompName:6-Methyl-5-hepten-2-one \$\$ 5-Hepten-2-one, 6-methyl- (CAS) 6-Methyl-5-heptene-2-one \$\$ 6-METHYLHEPT-5-EN-2-ONE \$\$ (6-methyl)-E

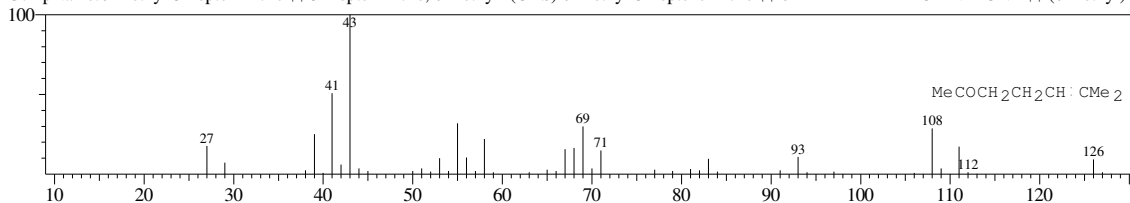

Hit#:5 Entry:18892 Library:WILEY7.LIB

SI:72 Formula:C<sub>8</sub>H<sub>14</sub>O CAS:110-93-0 MolWeight:126 RetIndex:0

CompName:6-Methyl-5-hepten-2-one \$\$ 5-Hepten-2-one, 6-methyl- (CAS) 6-Methyl-5-heptene-2-one \$\$ 6-METHYLHEPT-5-EN-2-ONE \$\$ (6-methyl)-E

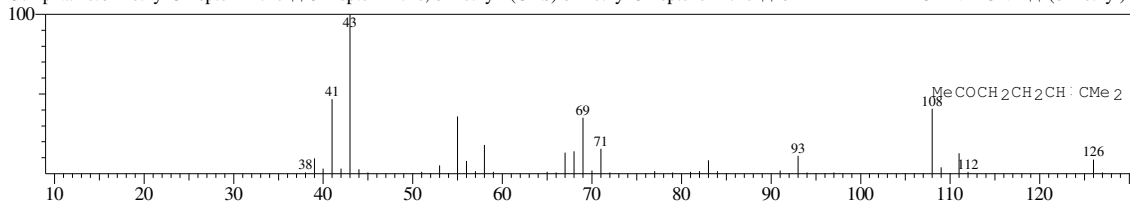



<< Target >>

Line#:7 R.Time:15.020(Scan#:1403) MassPeaks:9

RawMode:Averaged 15.010-15.030(1402-1404) BasePeak:54.05(3727)

BG Mode:Calc. from Peak Group 1 - Event 1

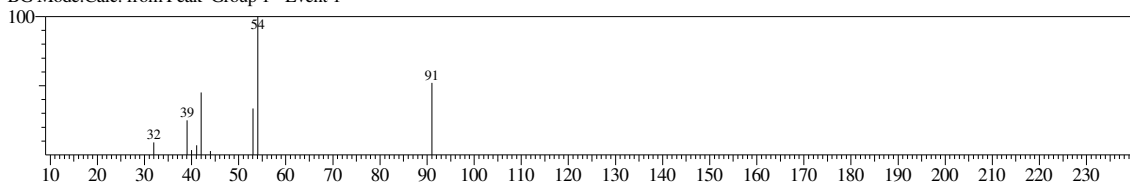

Hit#:1 Entry:5816 Library:WILEY7.LIB

SI:73 Formula:C4 H2 O3 CAS:108-31-6 MolWeight:98 RetIndex:0

CompName:2,5-Furandione (CAS) Maleic anhydride \$\$ BM 10 \$\$ Maleic acid anhydride \$\$ Toxilic anhydride \$\$ Dihydro-2,5-dioxofuran \$\$ cis-Butenedioic anhydride

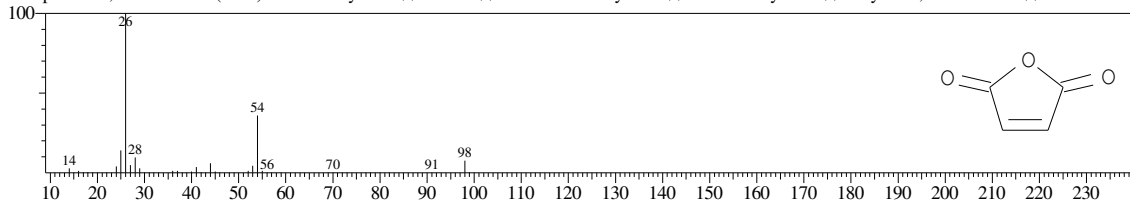

Hit#:2 Entry:5813 Library:WILEY7.LIB

SI:73 Formula:C4 H2 O3 CAS:108-31-6 MolWeight:98 RetIndex:0

CompName:2,5-Furandione (CAS) Maleic anhydride \$\$ BM 10 \$\$ Maleic acid anhydride \$\$ Toxilic anhydride \$\$ Dihydro-2,5-dioxofuran \$\$ cis-Butenedioic anhydride

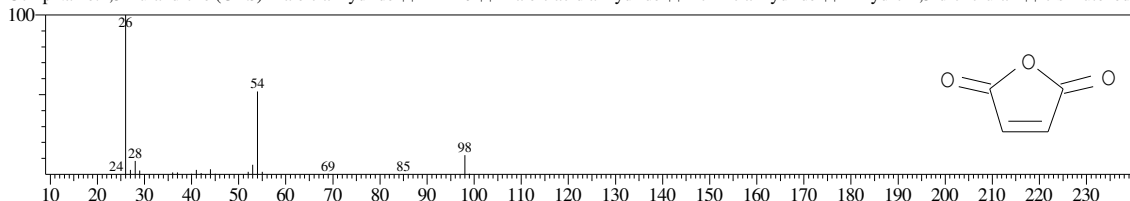

Hit#:3 Entry:205711 Library:WILEY7.LIB

SI:72 Formula:C14 H18 N2 O5 CAS:56272-47-0 MolWeight:294 RetIndex:0

CompName:L-Alanine, N-(N-acetyl-L-tyrosyl)- (CAS) ACETYL-TYROSYL-ALANINE \$\$

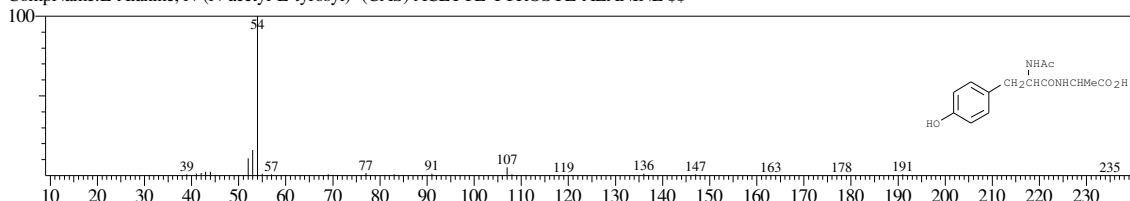

Hit#:4 Entry:107450 Library:WILEY7.LIB

SI:72 Formula:C11 H14 O2 S CAS:0-00-0 MolWeight:210 RetIndex:0

CompName:4-Butenyl-p-toluenesulfonate \$\$

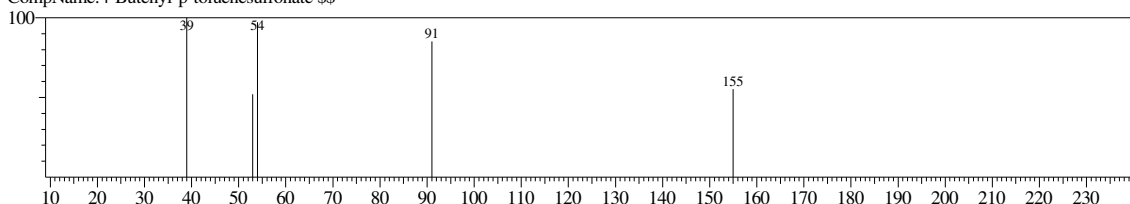

Hit#:5 Entry:25955 Library:WILEY7.LIB

SI:70 Formula:C8 H12 N2 CAS:1124-11-4 MolWeight:136 RetIndex:0

CompName:Pyrazine, tetramethyl- (CAS) Tetramethylpyrazine \$\$ BS factor \$\$ 2,3,5,6-Tetramethylpyrazine \$\$ tetramethyl pyrazine \$\$ Tetramethylpyrazine

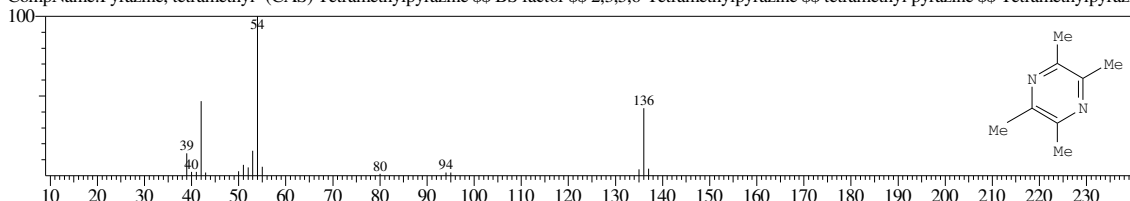

<< Target >>

Line#:8 R.Time:16.440(Scan#:1545) MassPeaks:7

RawMode:Averaged 16.430-16.450(1544-1546) BasePeak:85.00(2181)

BG Mode:Calc. from Peak Group 1 - Event 1

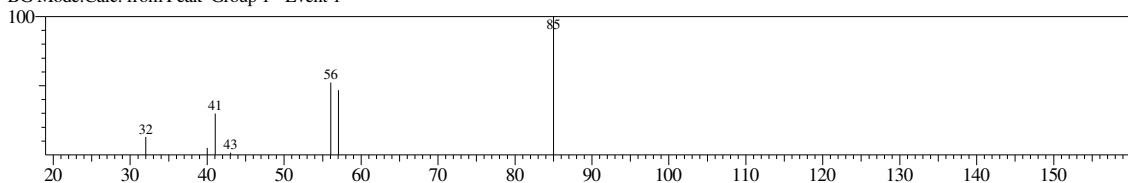

Hit#1 Entry:47921 Library:WILEY7.LIB

SI:86 Formula:C9 H18 O2 CAS:1927-68-0 MolWeight:158 RetIndex:0

CompName:2H-Pyran, 2-butoxytetrahydro- (CAS) N-BUTYL TETRAHYDROPYRANYL ETHER \$\$ 2-Butoxyoxane \$\$ 2-Butoxytetrahydropyran \$\$ 2-b

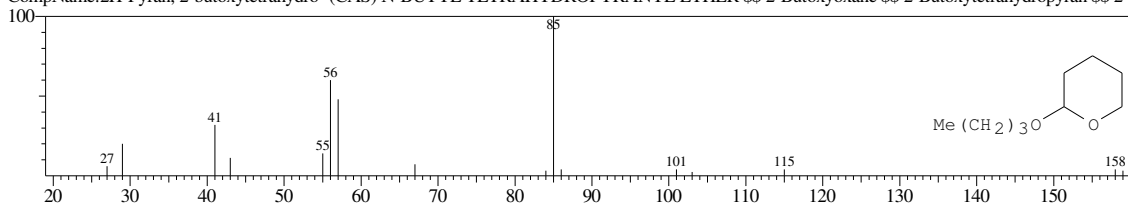

Hit#2 Entry:47940 Library:WILEY7.LIB

SI:85 Formula:C9 H18 O2 CAS:32767-69-4 MolWeight:158 RetIndex:0

CompName:(tetrahydropyran-4-yl)-(s-butyl)-ether \$\$ (tetrahydropyran-4-yl)-(iso-butyl)-ether \$\$ 2H-Pyran, tetrahydro-2-(1-methylpropoxy)- (CAS) 2H-Py

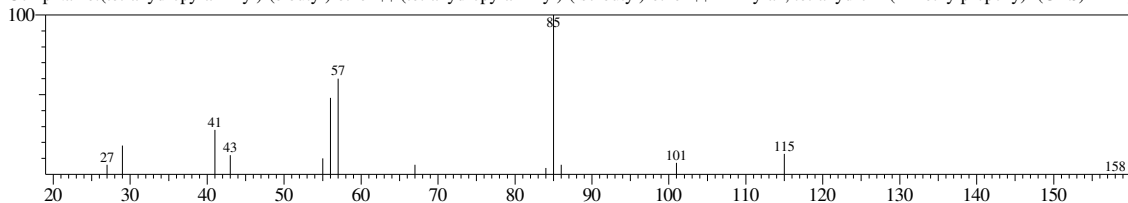

Hit#3 Entry:47097 Library:WILEY7.LIB

SI:84 Formula:C8 H14 O3 CAS:112399-92-5 MolWeight:158 RetIndex:0

CompName:n-butyl 3,4-epoxybutyrate \$\$

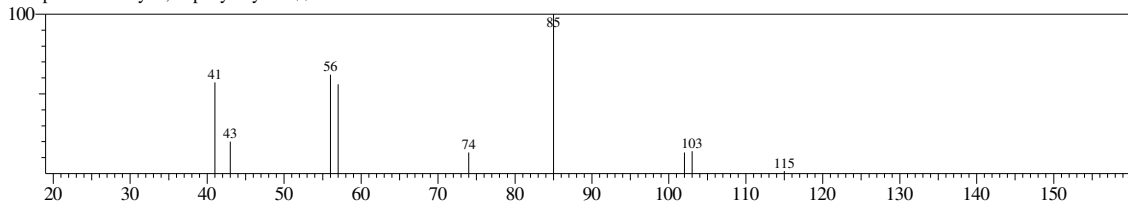

Hit#4 Entry:72940 Library:WILEY7.LIB

SI:83 Formula:C7 H12 Cl2 O CAS:0-00-0 MolWeight:182 RetIndex:0

CompName:2-(2,2-Dichloroethyl)tetrahydropyran \$\$ 2-[(2'-Dichloro)ethyl]-tetrahydropyrane \$\$

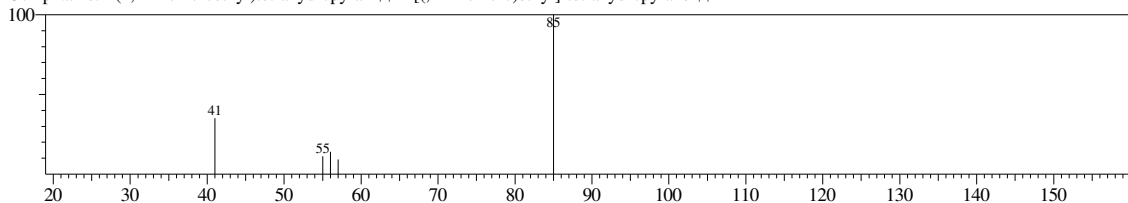

Hit#5 Entry:47866 Library:WILEY7.LIB

SI:82 Formula:C9 H18 O2 CAS:589-59-3 MolWeight:158 RetIndex:0

CompName:Butanoic acid, 3-methyl-, 2-methylpropyl ester (CAS) Isobutyl isovalerate \$\$ Isobutyl isopentanoate \$\$ ISOBUTYL 3-METHYLBUTANOAT

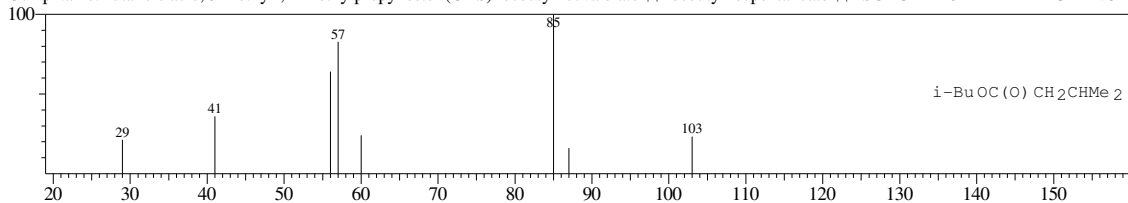

<< Target >>

Line#:9 R.Time:17.100(Scan#:1611) MassPeaks:6

RawMode:Averaged 17.090-17.110(1610-1612) BasePeak:91.05(1928)

BG Mode:Calc. from Peak Group 1 - Event 1

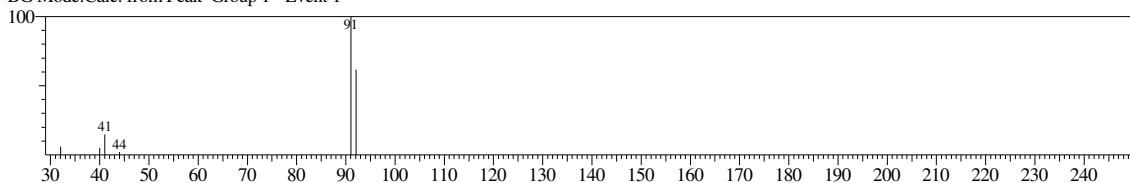

Hit#1 Entry:147224 Library:WILEY7.LIB

SI:90 Formula:C11 H15 BR O CAS:60789-54-0 MolWeight:242 RetIndex:0

CompName:4-Benzyloxy-1-bromobutane \$\$ Benzene, [(4-bromobutoxy)methyl]- (CAS) 4-Benzyloxybutyl bromide \$\$ Ether, benzyl 4-bromobutyl \$\$

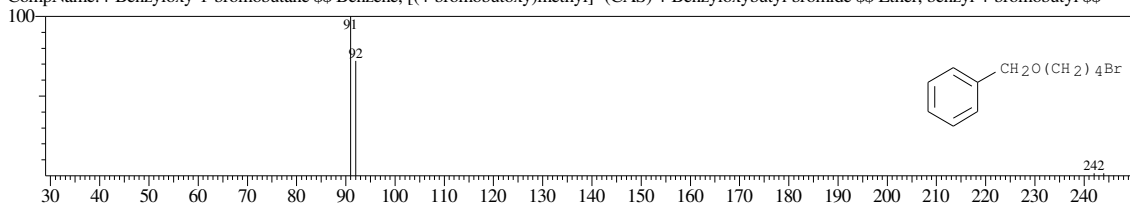

Hit#2 Entry:130213 Library:WILEY7.LIB

SI:90 Formula:C10 H13 BR O CAS:54314-84-0 MolWeight:228 RetIndex:0

CompName:3-Benzyloxy-1-bromo-propane \$\$ Benzene, [(3-bromopropoxy)methyl]- (CAS) Benzyl 3-bromopropyl ether \$\$ 3-Benzyloxypropyl bromide \$\$

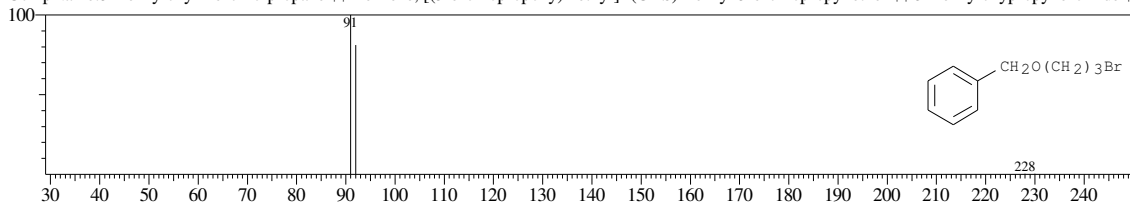

Hit#3 Entry:4678 Library:WILEY7.LIB

SI:90 Formula:C7 H8 CAS:108-88-3 MolWeight:92 RetIndex:0

CompName:Benzene, methyl- (CAS) Toluene \$\$ CP 25 \$\$ Methylbenzene \$\$ Toluol \$\$ Methacide \$\$ Antisal 1a \$\$ Methylbenzol \$\$ Phenylmethane \$\$ M

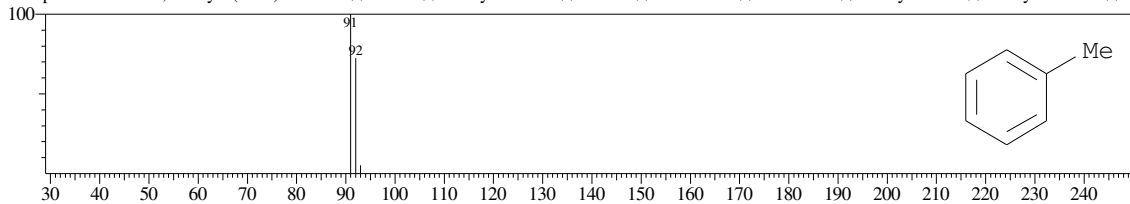

Hit#4 Entry:47544 Library:WILEY7.LIB

SI:89 Formula:C12 H14 CAS:75993-68-9 MolWeight:158 RetIndex:0

CompName:exo-Tetracyclo[4.4.1.1.(2,5).0(7,10)]dodeca-3,8-diene \$\$ Tetracyclo[4.4.1.1.(2,5).0(7,10)]dodeca-3,8-diene, (1.alpha.,2.beta.,5.beta.,6.alpha.,7.be

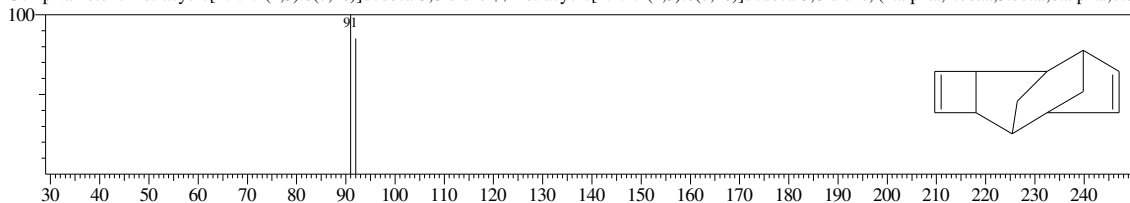

Hit#5 Entry:157425 Library:WILEY7.LIB

SI:89 Formula:C9 H18 N2 O4 S CAS:39184-59-3 MolWeight:250 RetIndex:0

CompName:2-Butanone, 3,3-dimethyl-1-(methylsulfonyl)-, O-[(methylamino)carbonyl]oxime (CAS) 3,3-Dimethyl-1-(methylsulfonyl)-2-butanone O-((meti

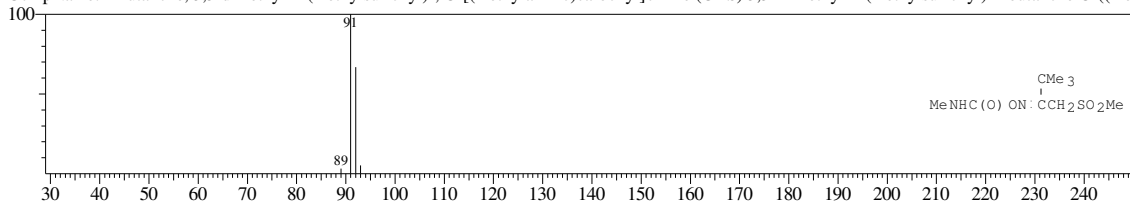

<< Target >>

Line#:10 R.Time:17.760(Scan#:1677) MassPeaks:16

RawMode:Averaged 17.750-17.770(1676-1678) BasePeak:30.05(3603)

BG Mode:Calc. from Peak Group 1 - Event 1

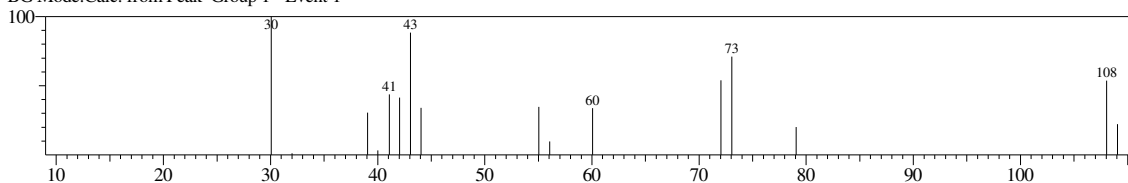

Hit#1 Entry:1536 Library:WILEY7.LIB

SI:75 Formula:C2 H7 N3 CAS:21770-81-0 MolWeight:73 RetIndex:0

CompName:Guanidine, methyl-, hydrochloride (CAS) N-Methylguanidine hydrochloride \$\$ Methylguanidine hydrochloride \$\$ N1-Methylguanidine hydro

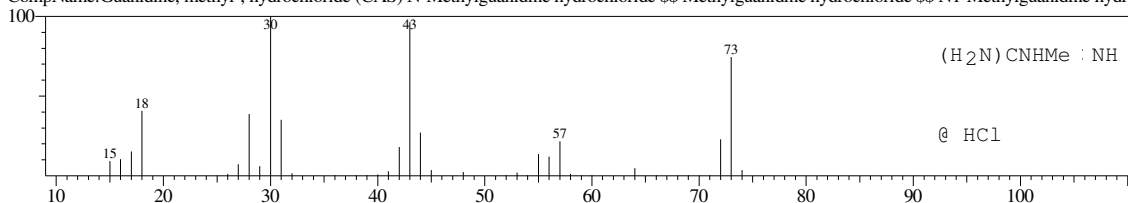

Hit#2 Entry:1535 Library:WILEY7.LIB

SI:75 Formula:C2 H7 N3 CAS:21770-81-0 MolWeight:73 RetIndex:0

CompName:N-METHYLGUANIDINE SULPHATE \$\$

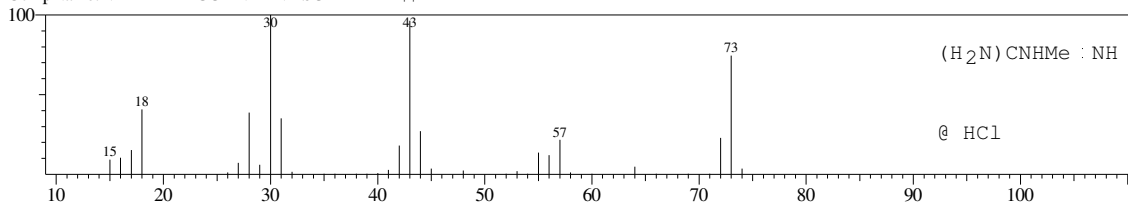

Hit#3 Entry:1534 Library:WILEY7.LIB

SI:72 Formula:C2 H7 N3 CAS:471-29-4 MolWeight:73 RetIndex:0

CompName:Guanidine, methyl- (CAS) N-Methylguanidine \$\$ Methylguanidine \$\$ N1-Methylguanidine \$\$ Methylguanidin \$\$ Monomethyl guanidin \$\$ N

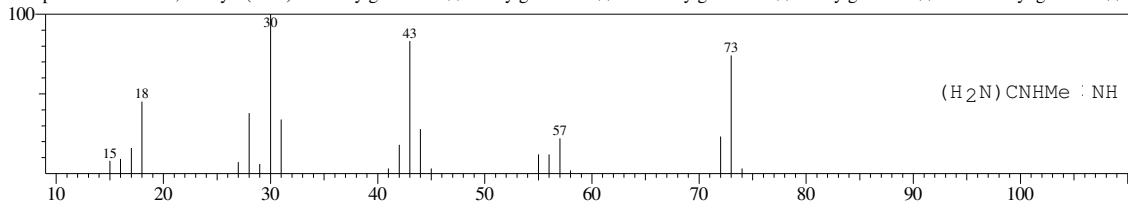

Hit#4 Entry:8165 Library:WILEY7.LIB

SI:71 Formula:C4 H9 N O2 CAS:544-16-1 MolWeight:103 RetIndex:0

CompName:Nitrous acid, butyl ester (CAS) n-Butyl nitrite \$\$ Butyl nitrite \$\$ Butyl ester of nitrous acid \$\$ n-C4H9ONO \$\$ Nitrous acid, n-butyl ester \$\$ N

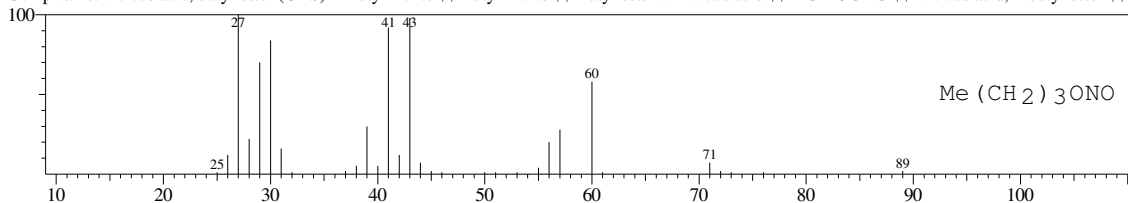

Hit#5 Entry:8164 Library:WILEY7.LIB

SI:71 Formula:C4 H9 N O2 CAS:544-16-1 MolWeight:103 RetIndex:0

CompName:Nitrous acid, butyl ester (CAS) n-Butyl nitrite \$\$ Butyl nitrite \$\$ Butyl ester of nitrous acid \$\$ n-C4H9ONO \$\$ Nitrous acid, n-butyl ester \$\$ N

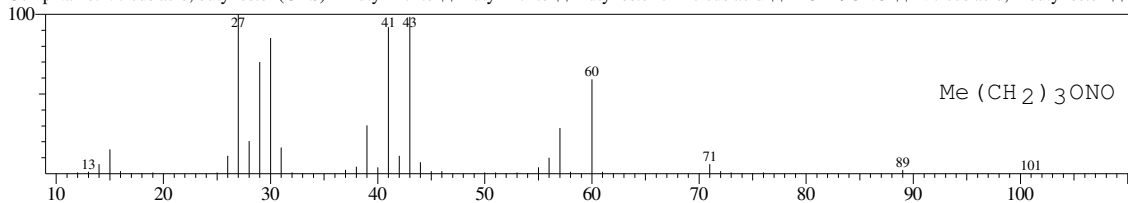

<< Target >>

Line#:11 R.Time:19.100(Scan#:1811) MassPeaks:10

RawMode:Averaged 19.090-19.110(1810-1812) BasePeak:57.05(3494)

BG Mode:Calc. from Peak Group 1 - Event 1

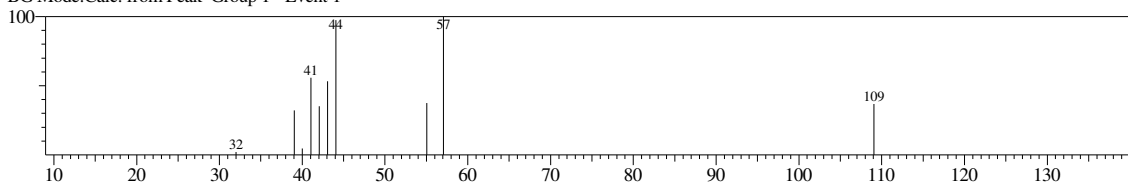

Hit#:1 Entry:6587 Library:WILEY7.LIB

SI:80 Formula:C6 H12 O CAS:4468-64-8 MolWeight:100 RetIndex:0

CompName:Oxetane, 2-propyl- (CAS) 2-N-PROPYL-OXETAN \$\$ Hexane, 1,3-epoxy- \$\$ 2-Propyloxetane \$\$

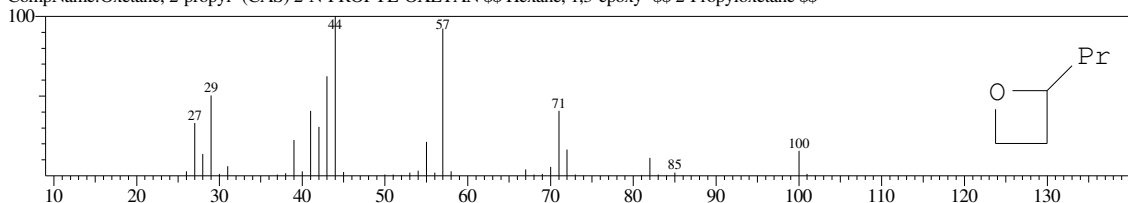

Hit#:2 Entry:1637 Library:WILEY7.LIB

SI:79 Formula:C4 H9 D O CAS:0-00-0 MolWeight:74 RetIndex:0

CompName:BUTYL ALCOHOL-2-D1 \$\$

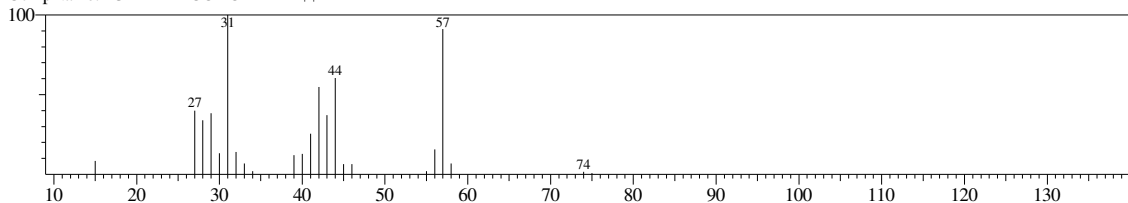

Hit#:3 Entry:25658 Library:WILEY7.LIB

SI:79 Formula:C4 H9 BR CAS:78-77-3 MolWeight:136 RetIndex:0

CompName:Propane, 1-bromo-2-methyl- (CAS) 1-Bromo-2-methylpropane \$\$ Isobutyl bromide \$\$ iso-C4H9Br \$\$ i-Butyl bromide \$\$ UN 2342 \$\$ PROP.

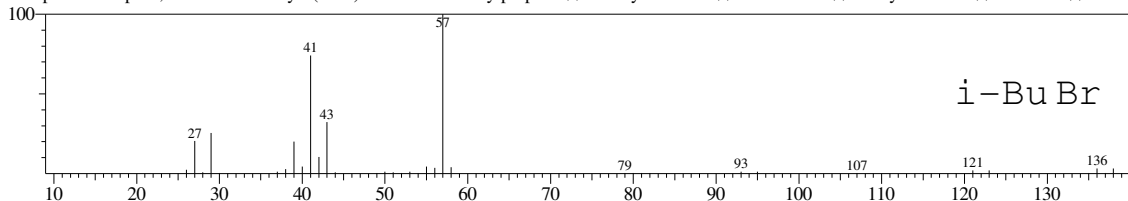

Hit#:4 Entry:68067 Library:WILEY7.LIB

SI:79 Formula:C7 H15 BR CAS:1974-04-5 MolWeight:178 RetIndex:0

CompName:Heptane, 2-bromo- (CAS) 2-Bromoheptane \$\$ 2-Heptyl bromide \$\$

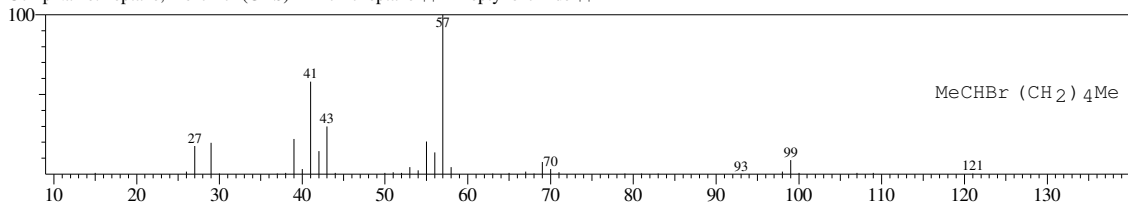

Hit#:5 Entry:25657 Library:WILEY7.LIB

SI:78 Formula:C4 H9 BR CAS:78-77-3 MolWeight:136 RetIndex:0

CompName:Propane, 1-bromo-2-methyl- (CAS) 1-Bromo-2-methylpropane \$\$ Isobutyl bromide \$\$ iso-C4H9Br \$\$ i-Butyl bromide \$\$ UN 2342 \$\$ PROP.

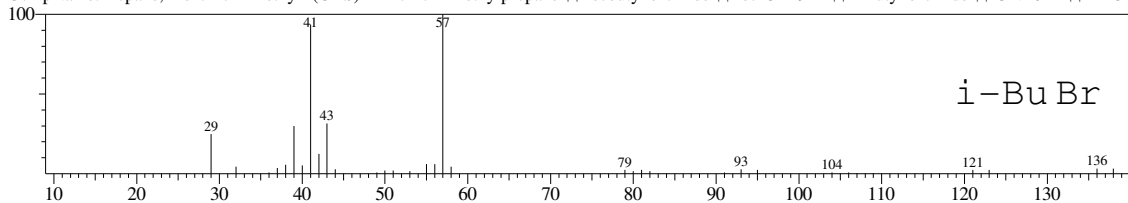

<< Target >>

Line#:12 R.Time:22.230(Scan#:2124) MassPeaks:13

RawMode:Averaged 22.220-22.240(2123-2125) BasePeak:41.05(2310)

BG Mode:Calc. from Peak Group 1 - Event 1

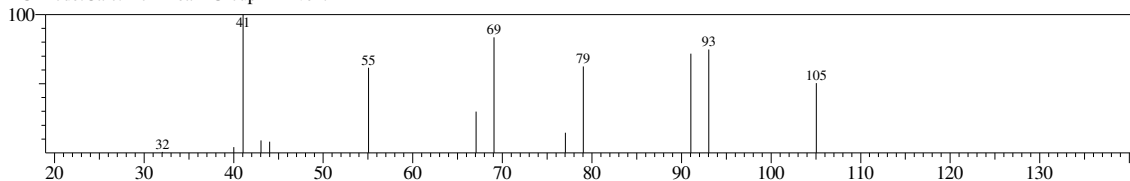

Hit#:1 Entry:26212 Library:WILEY7.LIB

SI:79 Formula:C10 H16 CAS:123-35-3 MolWeight:136 RetIndex:0

CompName:.beta.-Myrcene \$\$ 1,6-Octadiene, 7-methyl-3-methylene- (CAS) 2-Methyl-6-methylene-2,7-octadiene \$\$ 2-ETHENYL-6-METHYL-1,5-HEPTA

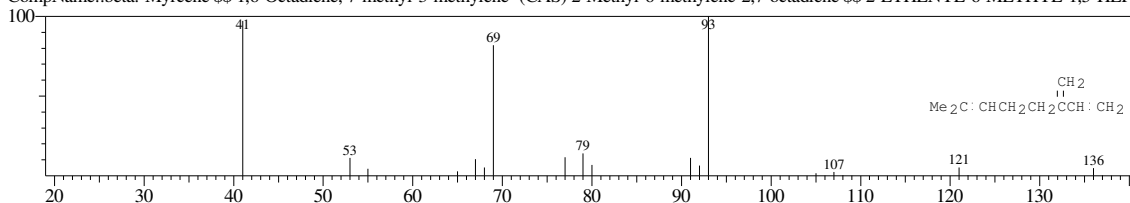

Hit#:2 Entry:26210 Library:WILEY7.LIB

SI:78 Formula:C10 H16 CAS:123-35-3 MolWeight:136 RetIndex:0

CompName:.beta.-Myrcene \$\$ 1,6-Octadiene, 7-methyl-3-methylene- (CAS) 2-Methyl-6-methylene-2,7-octadiene \$\$ 2-ETHENYL-6-METHYL-1,5-HEPTA

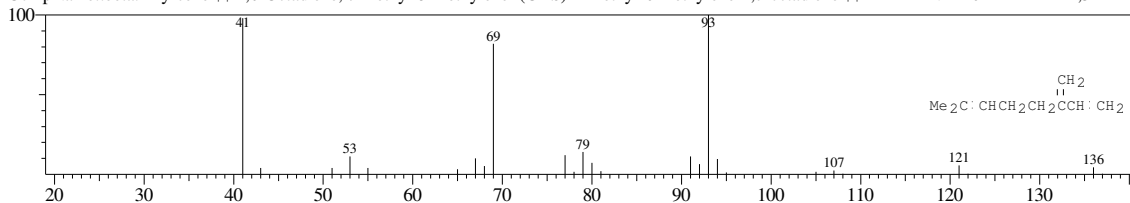

Hit#:3 Entry:26215 Library:WILEY7.LIB

SI:78 Formula:C10 H16 CAS:123-35-3 MolWeight:136 RetIndex:0

CompName:.beta.-Myrcene \$\$ 1,6-Octadiene, 7-methyl-3-methylene- (CAS) 2-Methyl-6-methylene-2,7-octadiene \$\$ 2-ETHENYL-6-METHYL-1,5-HEPTA

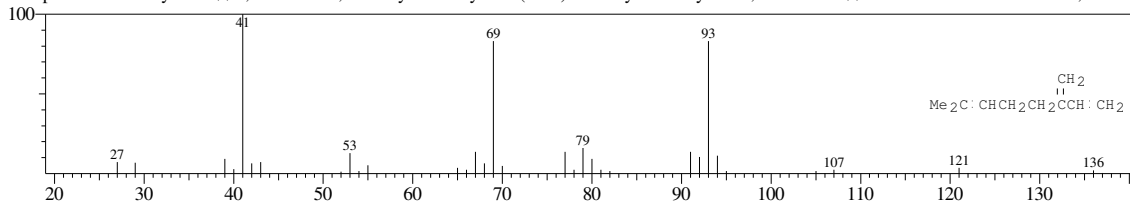

Hit#:4 Entry:101100 Library:WILEY7.LIB

SI:78 Formula:C15 H24 CAS:515-13-9 MolWeight:204 RetIndex:0

CompName:.beta.-elemene \$\$

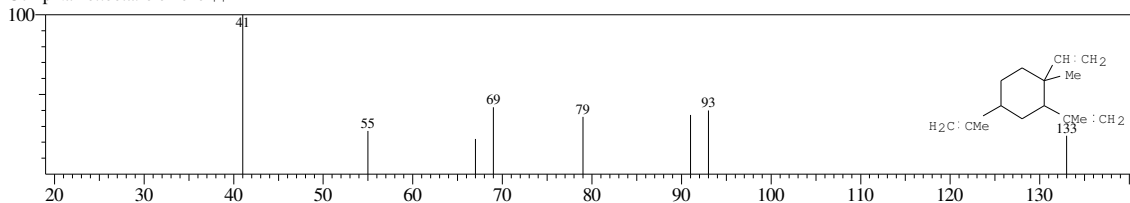

Hit#:5 Entry:26200 Library:WILEY7.LIB

SI:77 Formula:C10 H16 CAS:123-35-3 MolWeight:136 RetIndex:0

CompName:.beta.-Myrcene \$\$ 1,6-Octadiene, 7-methyl-3-methylene- (CAS) 2-Methyl-6-methylene-2,7-octadiene \$\$ 2-ETHENYL-6-METHYL-1,5-HEPTA

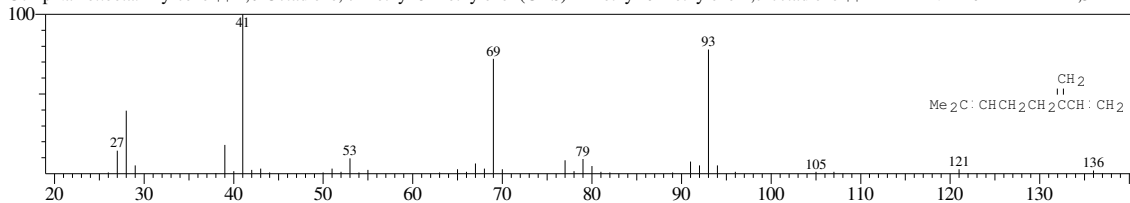

<< Target >>

Line#:13 R.Time:22.890(Scan#:2190) MassPeaks:16

RawMode:Averaged 22.880-22.900(2189-2191) BasePeak:91.05(4710)

BG Mode:Calc. from Peak Group 1 - Event 1

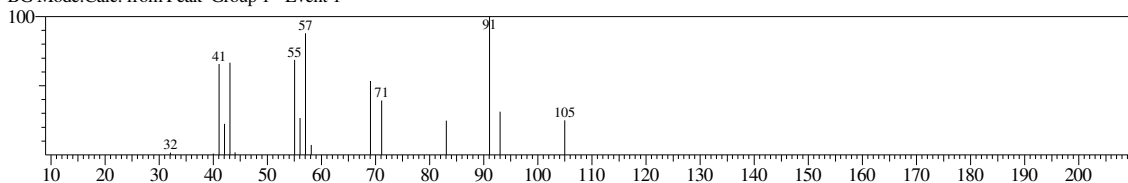

Hit#1 Entry:50274 Library:WILEY7.LIB

SI:87 Formula:C10 H11 N O CAS:1611-83-2 MolWeight:161 RetIndex:0

CompName:2-Propenamide, 2-methyl-N-phenyl- \$\$ N-Phenylmethacrylamide \$\$ N-PHENYL-METHACRYLIC ACID AMIDE \$\$ Acrylanilide, 2-methyl

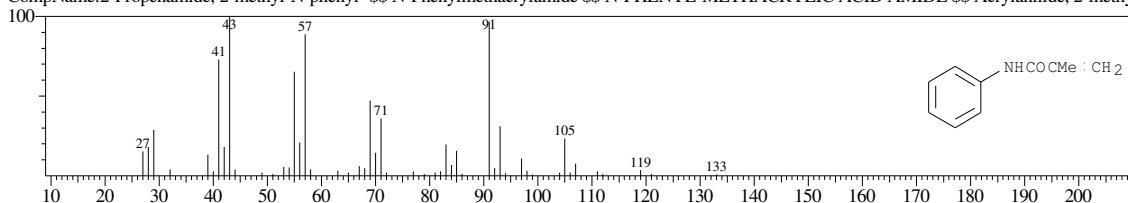

Hit#2 Entry:67134 Library:WILEY7.LIB

SI:87 Formula:C10 H21 Cl CAS:1002-69-3 MolWeight:176 RetIndex:0

CompName:Decane, 1-chloro- (CAS) 1-Chlorodecane \$\$ Decyl chloride \$\$ n-Decyl chloride \$\$ 1-CHLORDECAN \$\$

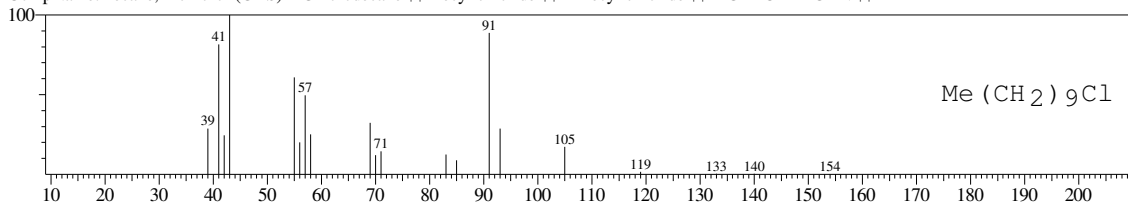

Hit#3 Entry:36438 Library:WILEY7.LIB

SI:86 Formula:C8 H17 Cl CAS:111-85-3 MolWeight:148 RetIndex:0

CompName:Octane, 1-chloro- (CAS) 1-Chlorooctane \$\$ Octyl chloride \$\$ Capryl chloride \$\$ 1-Octyl chloride \$\$ n-Octyl chloride \$\$

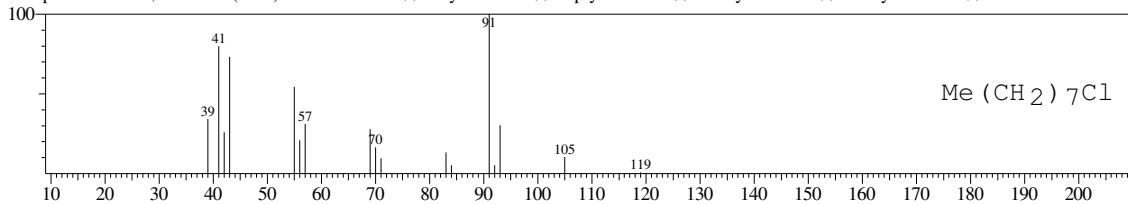

Hit#4 Entry:36436 Library:WILEY7.LIB

SI:86 Formula:C8 H17 Cl CAS:111-85-3 MolWeight:148 RetIndex:0

CompName:Octane, 1-chloro- (CAS) 1-Chlorooctane \$\$ Octyl chloride \$\$ Capryl chloride \$\$ 1-Octyl chloride \$\$ n-Octyl chloride \$\$

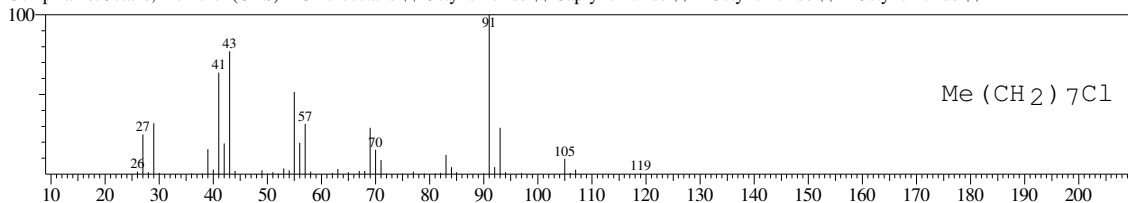

Hit#5 Entry:100594 Library:WILEY7.LIB

SI:85 Formula:C12 H25 Cl CAS:112-52-7 MolWeight:204 RetIndex:0

CompName:Dodecane, 1-chloro- (CAS) 1-Chlorododecane \$\$ Lauryl chloride \$\$ Dodecyl chloride \$\$ n-Dodecyl chloride \$\$ 1-CHLORDODECAN \$\$

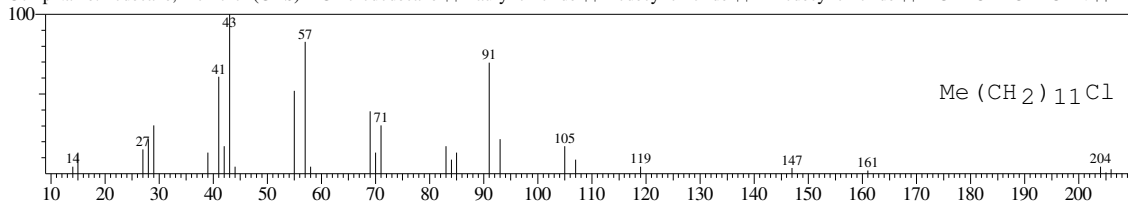

<< Target >>

Line#:14 R.Time:23.900(Scan#:2291) MassPeaks:17

RawMode:Averaged 23.890-23.910(2290-2292) BasePeak:55.05(4410)

BG Mode:Calc. from Peak Group 1 - Event 1

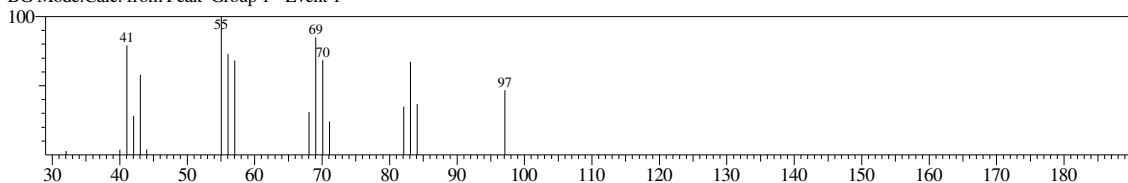

Hit#:1 Entry:79270 Library:WILEY7.LIB

SI:92 Formula:C12 H26 O CAS:112-53-8 MolWeight:186 RetIndex:0

CompName:1-Dodecanol (CAS) n-Dodecanol \$\$ CO 12 \$\$ S 1298 \$\$ Dodecanol \$\$ Pisol \$\$ Alfol 12 \$\$ Sipol L 12 \$\$ Lauryl 24 \$\$ Siponol 25 \$\$ Siponol

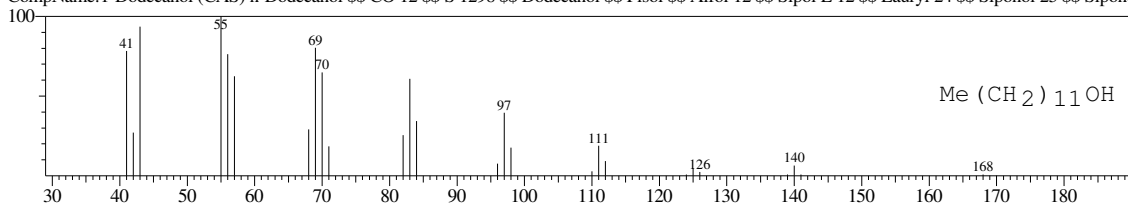

Hit#:2 Entry:63455 Library:WILEY7.LIB

SI:91 Formula:C11 H24 O CAS:112-42-5 MolWeight:172 RetIndex:0

CompName:1-Undecanol (CAS) n-Undecanol \$\$ 1-Hendecanol \$\$ n-Undecan-1-ol \$\$ Undecyl alcohol \$\$ Hendecyl alcohol \$\$ n-Undecyl alcohol \$\$ Hend

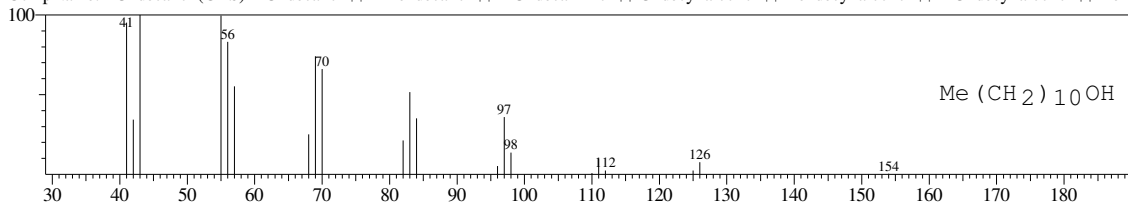

Hit#:3 Entry:63450 Library:WILEY7.LIB

SI:90 Formula:C11 H24 O CAS:112-42-5 MolWeight:172 RetIndex:0

CompName:1-Undecanol (CAS) n-Undecanol \$\$ 1-Hendecanol \$\$ n-Undecan-1-ol \$\$ Undecyl alcohol \$\$ Hendecyl alcohol \$\$ n-Undecyl alcohol \$\$ Hend

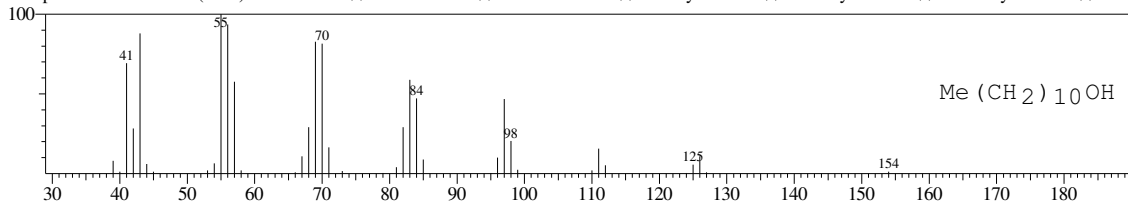

Hit#:4 Entry:48011 Library:WILEY7.LIB

SI:89 Formula:C10 H22 O CAS:112-30-1 MolWeight:158 RetIndex:0

CompName:1-Decanol (CAS) Decyl alcohol \$\$ T 148 \$\$ Alfol 10 \$\$ n-Decanol \$\$ Sipol L 10 \$\$ Alcohol C10 \$\$ Alcohol C-10 \$\$ n-Decan-1-ol \$\$ Nonyl

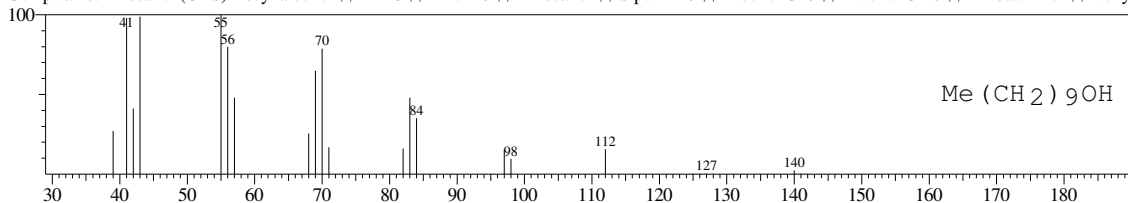

Hit#:5 Entry:79264 Library:WILEY7.LIB

SI:89 Formula:C12 H26 O CAS:112-53-8 MolWeight:186 RetIndex:0

CompName:1-Dodecanol (CAS) n-Dodecanol \$\$ CO 12 \$\$ S 1298 \$\$ Dodecanol \$\$ Pisol \$\$ Alfol 12 \$\$ Sipol L 12 \$\$ Lauryl 24 \$\$ Siponol 25 \$\$ Siponol

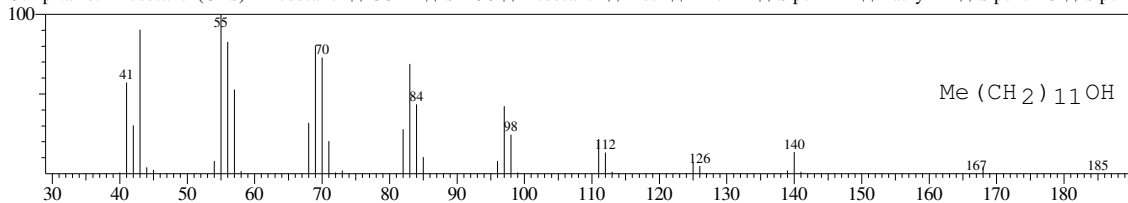



<< Target >>

Line#:15 R.Time:25.950(Scan#:2496) MassPeaks:7

RawMode:Averaged 25.940-25.960(2495-2497) BasePeak:43.05(1768)

BG Mode:Calc. from Peak Group 1 - Event 1

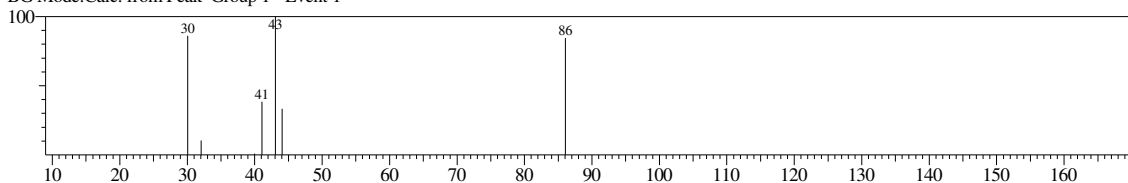

Hit#:1 Entry:3191 Library:WILEY7.LIB

SI:83 Formula:C3 H6 N2 O CAS:15216-10-1 MolWeight:86 RetIndex:0

CompName:Azetidine, 1-nitroso- (CAS) Nitrosoazetidine \$\$ Nitrosotrimethyleneimine \$\$ N-nitrosoazetidine \$\$ N-Nitrosotrimethyleneimine \$\$ Nitroso-az

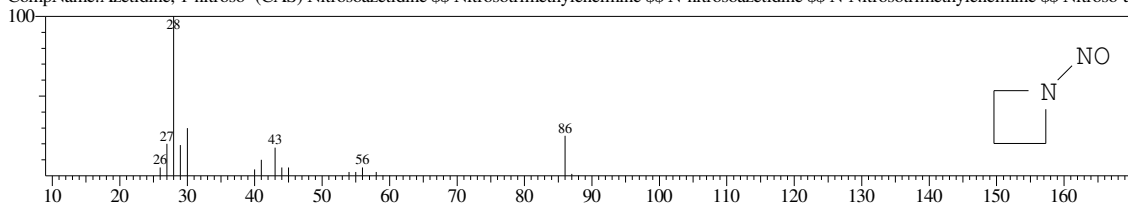

Hit#:2 Entry:48438 Library:WILEY7.LIB

SI:77 Formula:C8 H17 N O2 CAS:6141-42-0 MolWeight:159 RetIndex:0

CompName:Norleucine, ethyl ester (CAS)

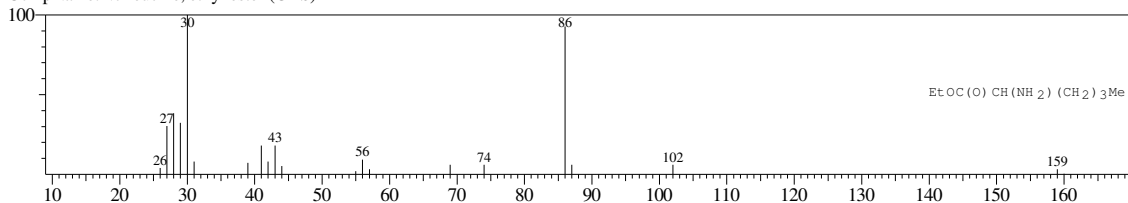

Hit#:3 Entry:22363 Library:WILEY7.LIB

SI:76 Formula:C6 H13 N O2 CAS:61-90-5 MolWeight:131 RetIndex:0

CompName:L-Leucine (CAS) N-LEUCINE \$\$ Leu \$\$ Leucine, L- \$\$ L-(+)-Leucine \$\$ Leucine \$\$ (S)-(+)-Leucine \$\$ .alpha.-Aminoisocaproic acid \$\$ 2-

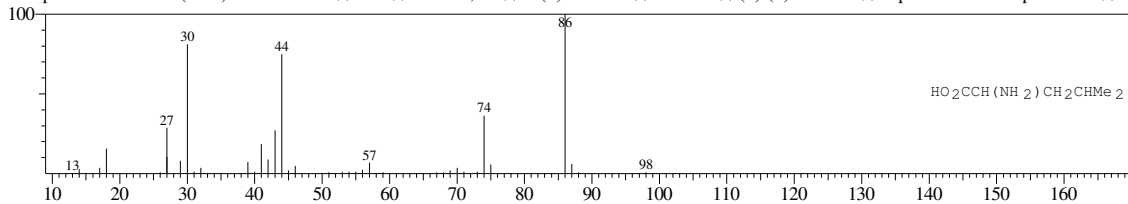

Hit#:4 Entry:21018 Library:WILEY7.LIB

SI:76 Formula:C8 H19 N CAS:111-92-2 MolWeight:129 RetIndex:0

CompName:1-Butanamine, N-butyl- (CAS) Di-n-butylamine \$\$ Dibutylamine \$\$ n-Dibutylamine \$\$ n-Butyl-1-butanamine \$\$ (n-C4H9)2NH \$\$ di-Normal

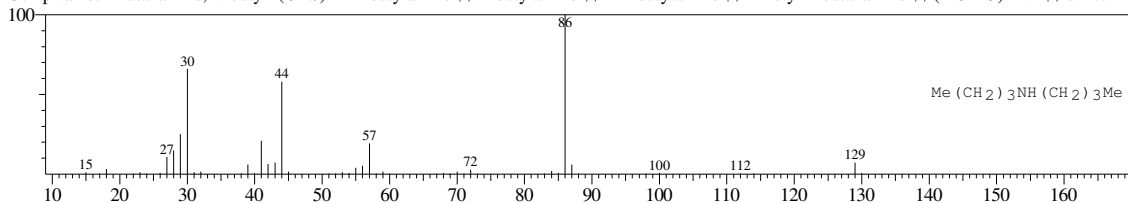

Hit#:5 Entry:48435 Library:WILEY7.LIB

SI:76 Formula:C8 H17 N O2 CAS:22628-26-8 MolWeight:159 RetIndex:0

CompName:L-Norleucine, ethyl ester (CAS) NORLEUCINE ETHYL ESTER \$\$ Norleucine, ethyl ester, L- \$\$

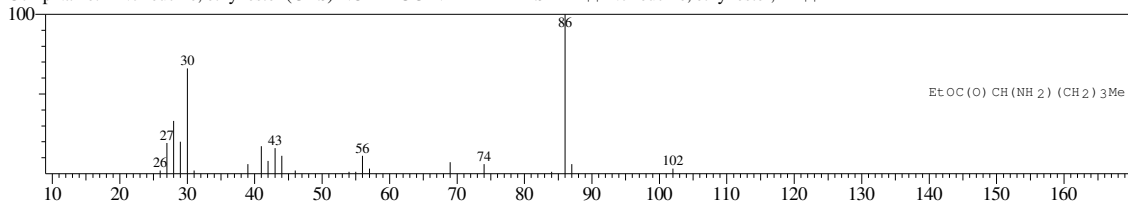

<< Target >>

Line#:16 R.Time:26.380(Scan#:2539) MassPeaks:5

RawMode:Averaged 26.370-26.390(2538-2540) BasePeak:41.05(1159)

BG Mode:Calc. from Peak Group 1 - Event 1

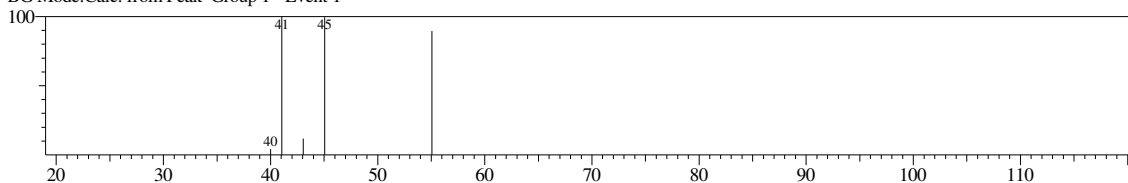

Hit#1 Entry:19156 Library:WILEY7.LIB

SI:84 Formula:C6 H9 N O2 CAS:0-00-0 MolWeight:127 RetIndex:0

CompName:2H-Pyran-3,4-dihydro-2-carboxamide \$\$

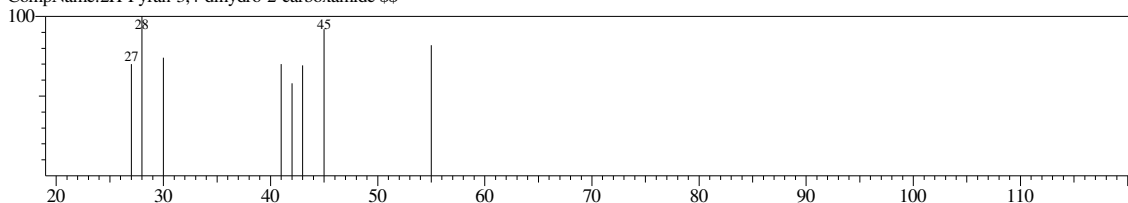

Hit#2 Entry:34342 Library:WILEY7.LIB

SI:81 Formula:C8 H18 O2 CAS:0-00-0 MolWeight:146 RetIndex:0

CompName:DL-1,3-DIMETHOXYHEXANE \$\$

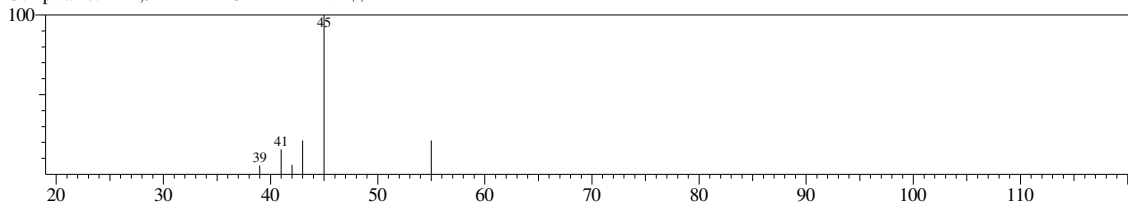

Hit#3 Entry:21396 Library:WILEY7.LIB

SI:78 Formula:C7 H14 O2 CAS:116315-32-3 MolWeight:130 RetIndex:0

CompName:(2R,3R,4S)-4-methyl-2,3-epoxyhexan-1-ol \$\$

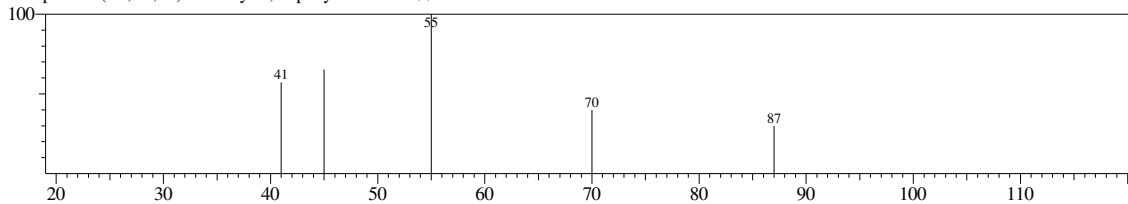

Hit#4 Entry:92371 Library:WILEY7.LIB

SI:77 Formula:C10 H14 O4 CAS:0-00-0 MolWeight:198 RetIndex:0

CompName:(E)-5-Allyloxycarbonyl-2-pentenoic acid \$\$

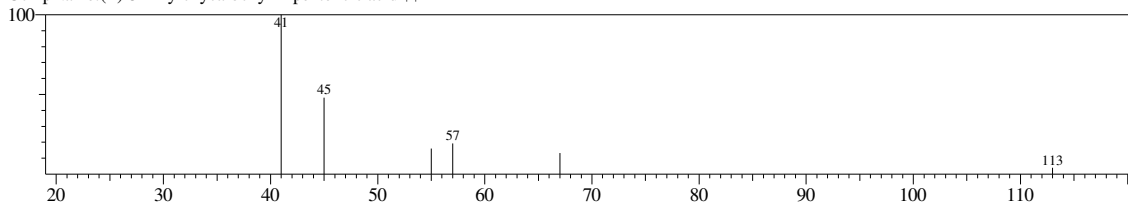

Hit#5 Entry:4104 Library:WILEY7.LIB

SI:77 Formula:C5 H12 O CAS:6032-29-7 MolWeight:88 RetIndex:0

CompName:2-Pentanol (CAS) Pentan-2-ol \$\$ 1-Methylbutanol \$\$ 2-Pentyl alcohol \$\$ 1-Methyl-1-butanol \$\$ sec-Pentanol \$\$ Methylpropylcarbinol \$\$ sec

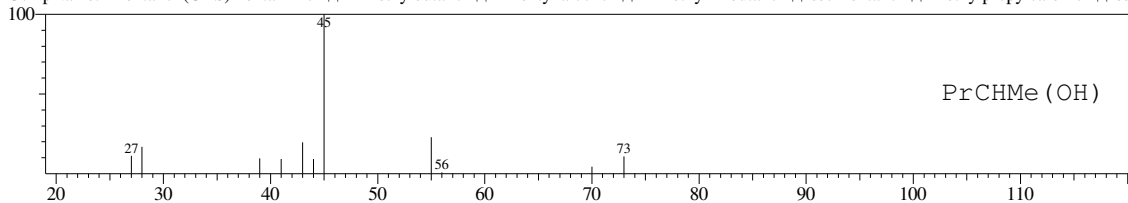

<< Target >>

Line#:17 R.Time:26.880(Scan#:2589) MassPeaks:9

RawMode:Averaged 26.870-26.890(2588-2590) BasePeak:55.05(1385)

BG Mode:Calc. from Peak Group 1 - Event 1

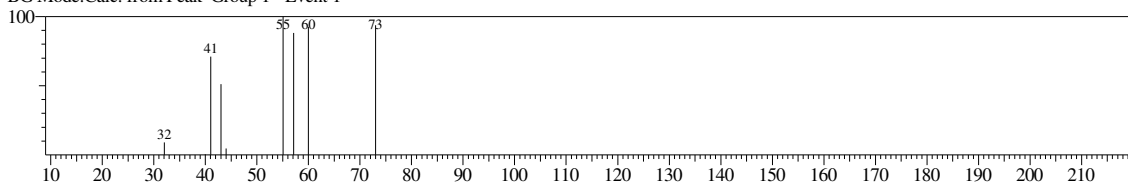

Hit#1 Entry:113509 Library:WILEY7.LIB

SI:85 Formula:C13 H26 O2 CAS:638-53-9 MolWeight:214 RetIndex:0

CompName:Tridecanoic acid (CAS) Tridecylic acid \$\$ n-Tridecanoic acid \$\$ n-Tridecoic acid \$\$

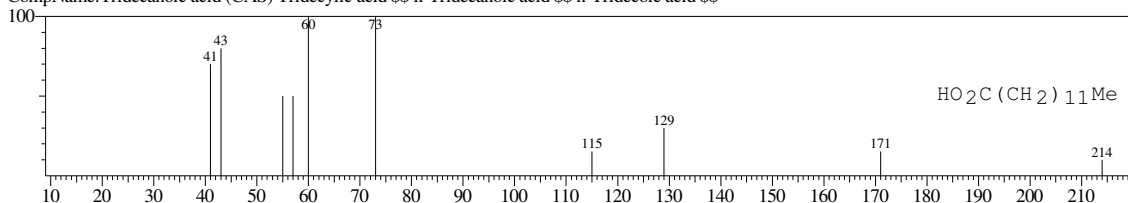

Hit#2 Entry:13602 Library:WILEY7.LIB

SI:83 Formula:C6 H12 O2 CAS:646-07-1 MolWeight:116 RetIndex:0

CompName:Pentanoic acid, 4-methyl- (CAS) 4-Methylvaleric acid \$\$ Isocaproic acid \$\$ Isohexanoic acid \$\$ Isobutylacetic acid \$\$ 4-Methylpentanoic acid

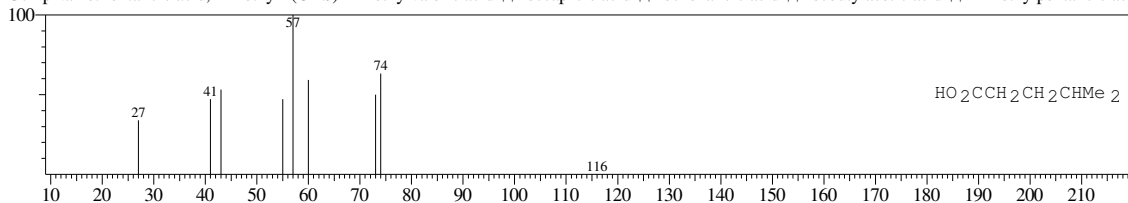

Hit#3 Entry:13984 Library:WILEY7.LIB

SI:79 Formula:C7 H16 O CAS:617-29-8 MolWeight:116 RetIndex:0

CompName:3-Hexanol, 2-methyl- (CAS) 2-Methylhexan-3-ol \$\$ 2-Methyl-3-hexanol \$\$ 5-Methyl-4-hexanol \$\$ 1-Isopropyl-1-butanol \$\$

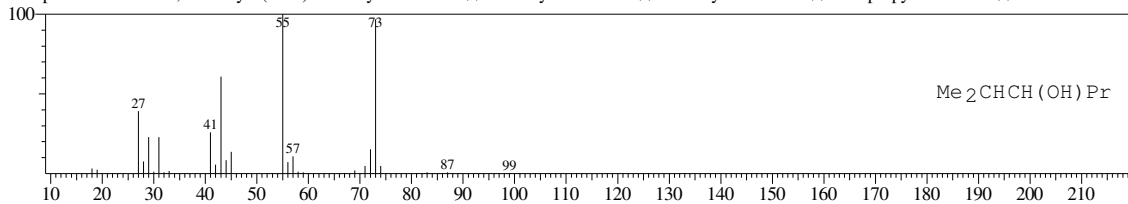

Hit#4 Entry:47783 Library:WILEY7.LIB

SI:79 Formula:C9 H18 O2 CAS:112-05-0 MolWeight:158 RetIndex:0

CompName:Nonanoic acid (CAS) Nonoic acid \$\$ Nonylic acid \$\$ Pelargic acid \$\$ n-Nonoic acid \$\$ n-Nonylic acid \$\$ n-Nonanoic acid \$\$ 1-Octanecarboxylic acid

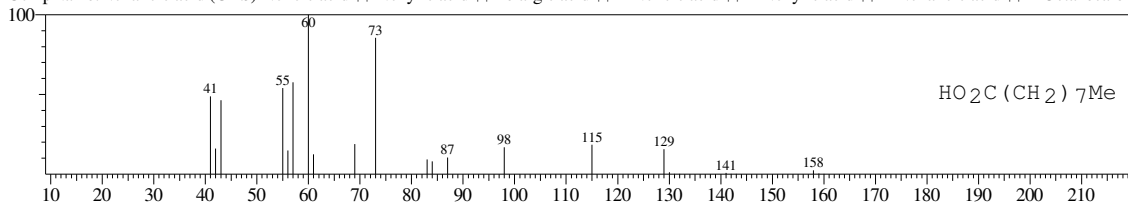

Hit#5 Entry:13967 Library:WILEY7.LIB

SI:78 Formula:C7 H16 O CAS:589-55-9 MolWeight:116 RetIndex:0

CompName:4-Heptanol (CAS) Dipropylcarbinol \$\$  $\text{CH}_3(\text{CH}_2)_2\text{CHOH}(\text{CH}_2)_2\text{CH}_3$  \$\$ di-n-Propylcarbinol \$\$

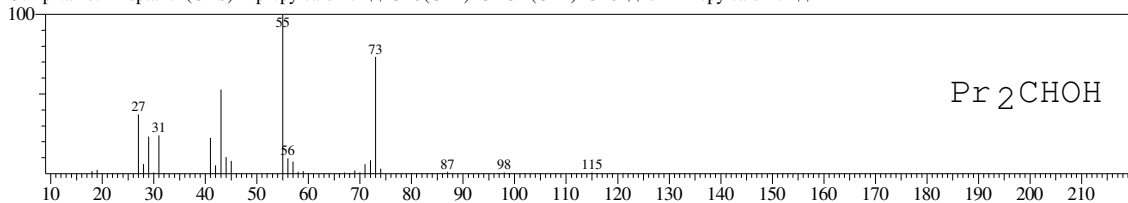

<< Target >>

Line#:18 R.Time:27.910(Scan#:2692) MassPeaks:9

RawMode:Averaged 27.900-27.920(2691-2693) BasePeak:57.05(2536)

BG Mode:Calc. from Peak Group 1 - Event 1

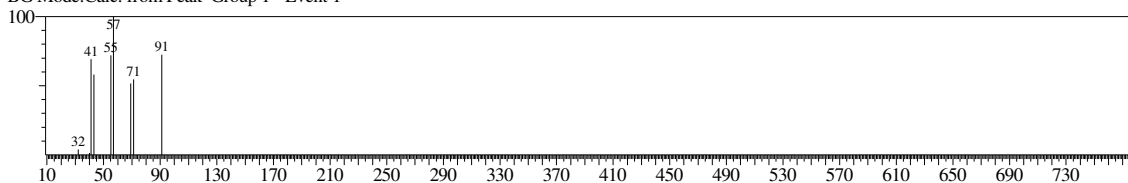

Hit#:1 Entry:336061 Library:WILEY7.LIB

SI:93 Formula:C48 H40 N2 O6 S CAS:0-00-0 MolWeight:772 RetIndex:0

CompName:Bis-[3-oxo-6'-diethylamino-spiro(phthalan-1,9-xanth-2'-yl)]sulphide \$\$

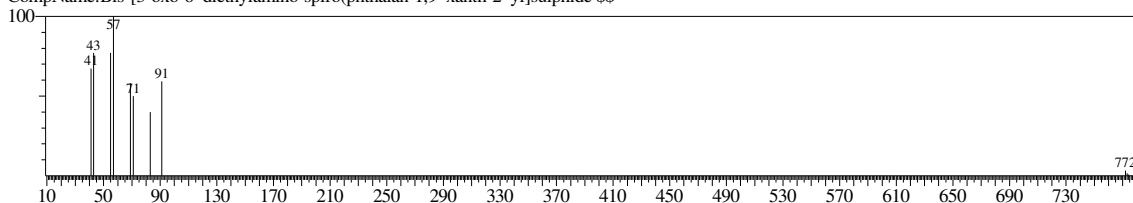

Hit#:2 Entry:168858 Library:WILEY7.LIB

SI:89 Formula:C16 H33 Cl CAS:4860-03-1 MolWeight:260 RetIndex:0

CompName:Hexadecane, 1-chloro- (CAS) 1-Chlorohexadecane \$\$ Cetyl chloride \$\$ Hexadecyl chloride \$\$ Palmityl chloride \$\$ 1-Chloro-hexadecane \$\$ n

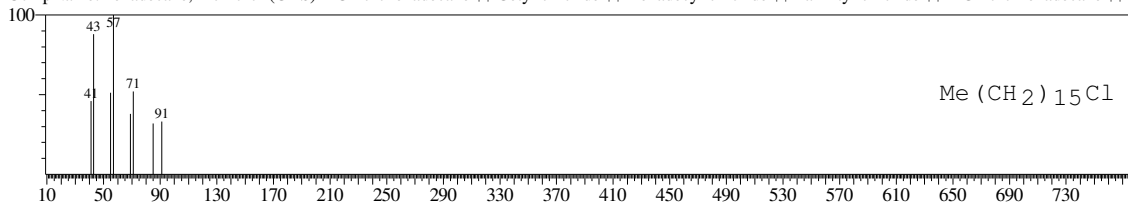

Hit#:3 Entry:292771 Library:WILEY7.LIB

SI:84 Formula:C23 H30 O3 S2 CAS:97644-69-4 MolWeight:418 RetIndex:0

CompName:(4.alpha.,10.beta.,15S)-4-carbomethoxy-3-desoxy-15-hydroxy-4-methyl-17,17-(ethylenedithio)-18-norandrosta-8,11,13-triene \$(4.alpha.,10.b

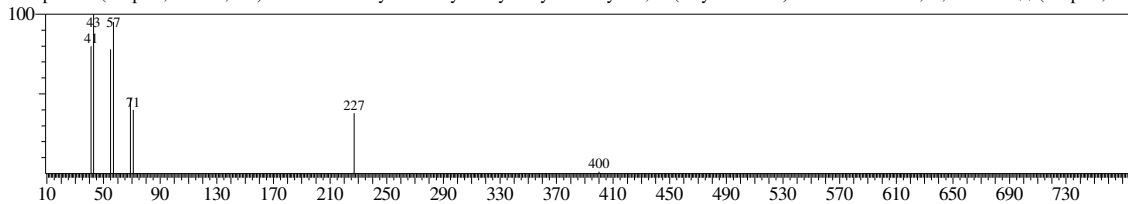

Hit#:4 Entry:311356 Library:WILEY7.LIB

SI:83 Formula:C23 H14 BR N3 O4 CAS:90181-05-8 MolWeight:475 RetIndex:0

CompName:1-(7-bromoquinoline-5,8-quinon-2-yl)-3-(methoxy-carbonyl)-4-methyl-1.beta.-carboline \$\$ 9H-Pyrido[3,4-b]indole-3-carboxylic acid, 1-(7-bron

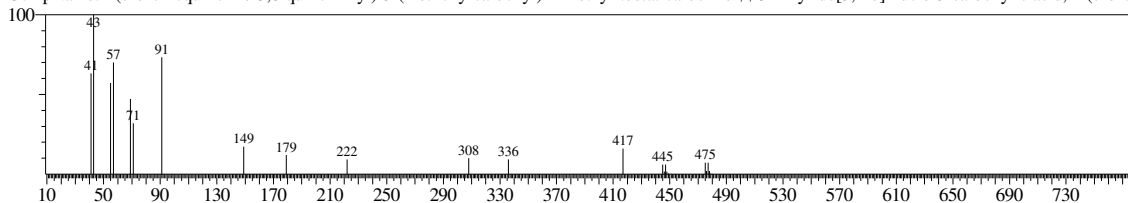

Hit#:5 Entry:265993 Library:WILEY7.LIB

SI:82 Formula:C19 H20 N4 O4 CAS:0-00-0 MolWeight:368 RetIndex:0

CompName:6-(Benzamido)-7-deaza-9-(2',3'-dideoxy-.beta.-D-glucopyranosyl)purine \$\$

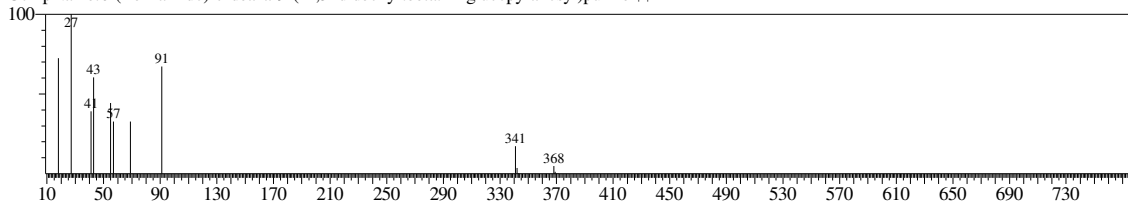

<< Target >>

Line#:19 R.Time:28.540(Scan#:2755) MassPeaks:11

RawMode:Averaged 28.530-28.550(2754-2756) BasePeak:99.05(2576)

BG Mode:Calc. from Peak Group 1 - Event 1

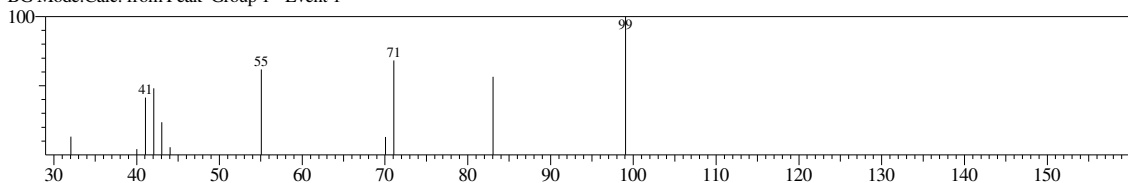

Hit#:1 Entry:61131 Library:WILEY7.LIB

SI:82 Formula:C10 H18 O2 CAS:705-86-2 MolWeight:170 RetIndex:0

CompName:2H-Pyran-2-one, tetrahydro-6-pentyl- (CAS) 5-Decanolide \$.delta.-Decalactone \$.delta.-Amylvalerolactone \$.delta.-Pentyl-5-pentanolide \$.delta.-5

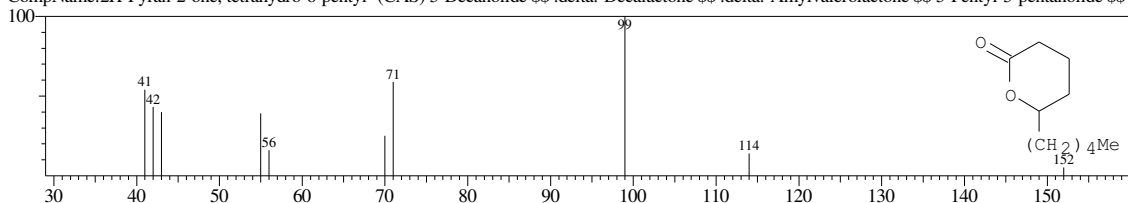

Hit#:2 Entry:44252 Library:WILEY7.LIB

SI:81 Formula:C6 H9 N3 O2 CAS:0-00-0 MolWeight:155 RetIndex:0

CompName:6-(Azidomethyl)tetrahydropyran-2-one \$.delta.-6

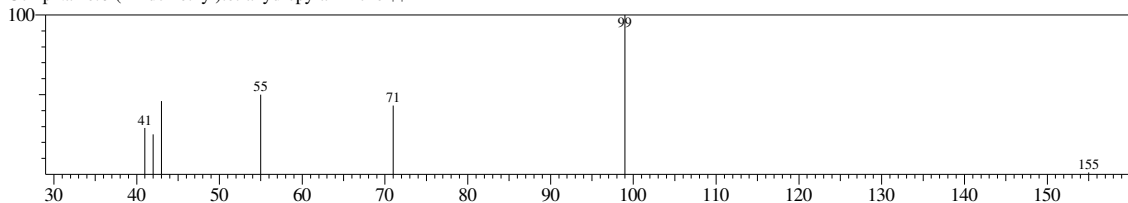

Hit#:3 Entry:30949 Library:WILEY7.LIB

SI:80 Formula:C8 H14 O2 CAS:0-00-0 MolWeight:142 RetIndex:0

CompName:5-Propylpentan-5-olide \$.delta.-5

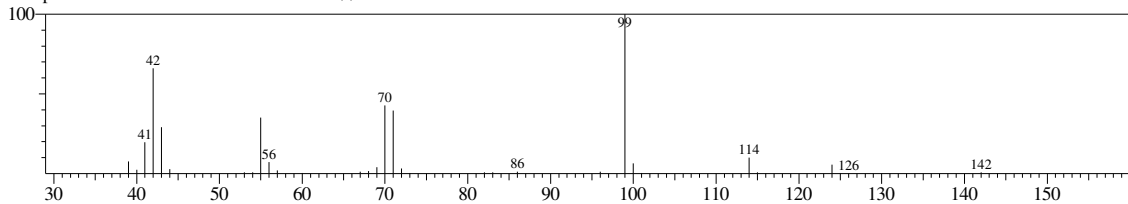

Hit#:4 Entry:31575 Library:WILEY7.LIB

SI:80 Formula:C8 H14 O2 CAS:698-76-0 MolWeight:142 RetIndex:0

CompName:2H-Pyran-2-one, tetrahydro-6-propyl- (CAS) .delta.-Octalactone \$.delta.-Propylvalerolactone \$.delta.-5-Hydroxyoctanoic acid lactone \$.delta.-5-Hydro

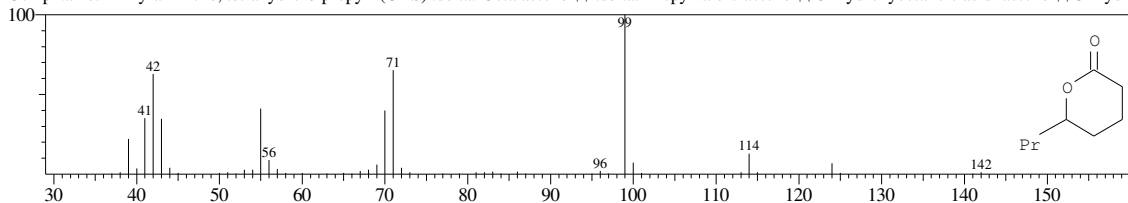

Hit#:5 Entry:110645 Library:WILEY7.LIB

SI:80 Formula:C13 H24 O2 CAS:0-00-0 MolWeight:212 RetIndex:0

CompName:tridecanolactone \$.delta.-13

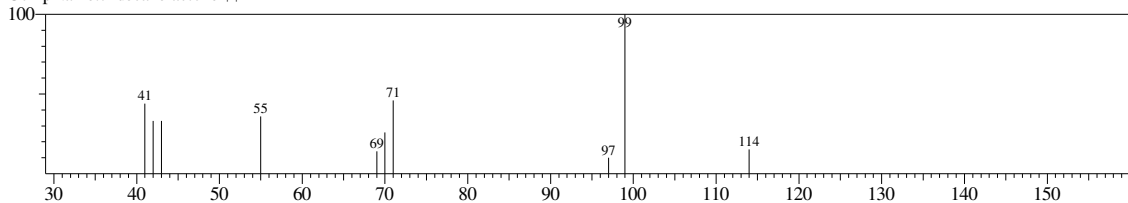

<< Target >>

Line#:20 R.Time:28.780(Scan#:2779) MassPeaks:13

RawMode:Averaged 28.770-28.790(2778-2780) BasePeak:69.05(2010)

BG Mode:Calc. from Peak Group 1 - Event 1

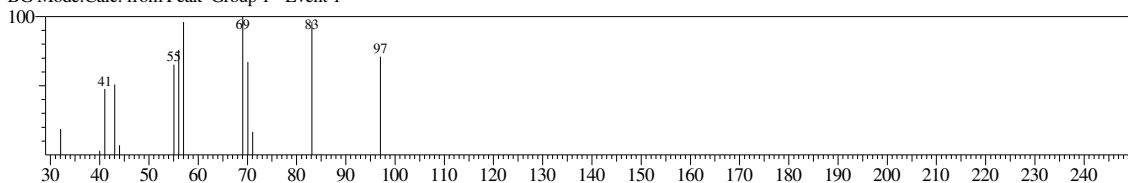

Hit#1 Entry:164530 Library:WILEY7.LIB

SI:89 Formula:C17 H36 O CAS:1454-85-9 MolWeight:256 RetIndex:0

CompName:1-Heptadecanol (CAS) n-Heptadecanol \$\$ Heptadecyl alcohol \$\$ Heptadecan-1-ol 1-Hydroxyheptadecane \$\$ Prim-n-heptadecyl alcohol \$\$

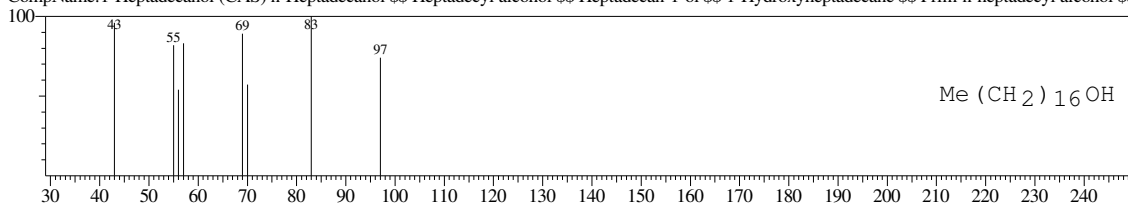

Hit#2 Entry:79271 Library:WILEY7.LIB

SI:87 Formula:C12 H26 O CAS:112-53-8 MolWeight:186 RetIndex:0

CompName:1-Dodecanol (CAS) n-Dodecanol \$\$ CO 12 \$\$ S 1298 \$\$ Dodecanol \$\$ Pisol \$\$ Alfol 12 \$\$ Sipol L 12 \$\$ Lauryl 24 \$\$ Siponol 25 \$\$ Siponol

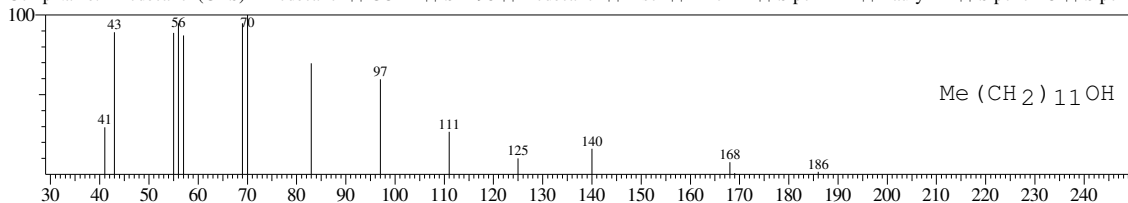

Hit#3 Entry:143891 Library:WILEY7.LIB

SI:84 Formula:C17 H34 CAS:41977-41-7 MolWeight:238 RetIndex:0

CompName:Cyclopropane, 1-methyl-1-(2-methylpropyl)-2-nonyl- (CAS) 2,4-DIMETHYL-4,5-METHYLENETETRADECANE \$\$

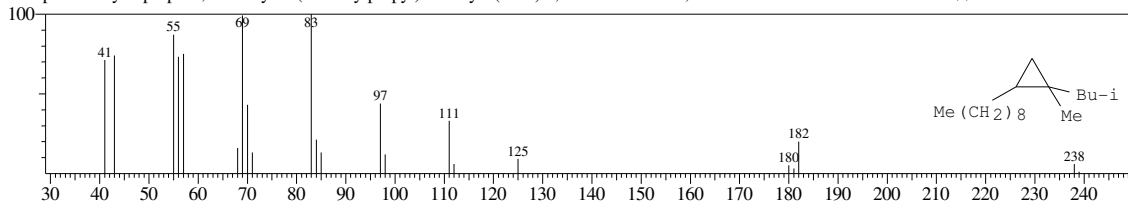

Hit#4 Entry:11496 Library:WILEY7.LIB

SI:84 Formula:C8 H16 CAS:4516-69-2 MolWeight:112 RetIndex:0

CompName:Cyclopentane, 1,1,3-trimethyl- (CAS) 1,1,3-Trimethylcyclopentane \$\$

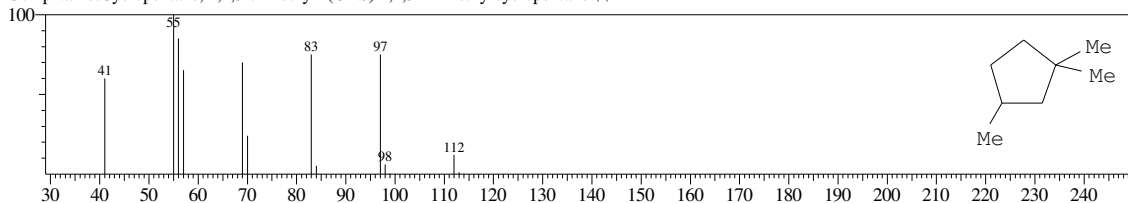

Hit#5 Entry:98161 Library:WILEY7.LIB

SI:83 Formula:C12 H26 S CAS:112-55-0 MolWeight:202 RetIndex:0

CompName:1-Dodecanethiol (CAS) n-Dodecyl mercaptan \$\$ n-Dodecanethiol \$\$ Lauryl mercaptan \$\$ Dodecane-1-thiol \$\$ Dodecyl mercaptan \$\$ n-Lauryl

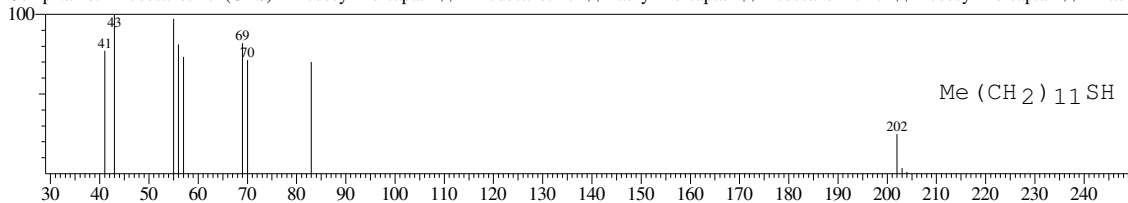

<< Target >>

Line#:21 R.Time:30.650(Scan#:2966) MassPeaks:14

RawMode:Averaged 30.640-30.660(2965-2967) BasePeak:104.05(10244)

BG Mode:Calc. from Peak Group 1 - Event 1

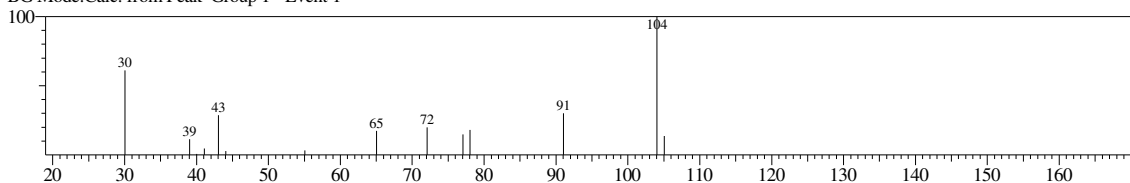

Hit#:1 Entry:52228 Library:WILEY7.LIB

SI:81 Formula:C10 H13 N O CAS:877-95-2 MolWeight:163 RetIndex:0

CompName:Acetamide, N-(2-phenylethyl)- (CAS) N-(2-Phenylethyl)acetamide \$\$ N-Phenethylacetamide \$\$ Acetamide, N-phenethyl- \$\$ N-Acetylpheneth

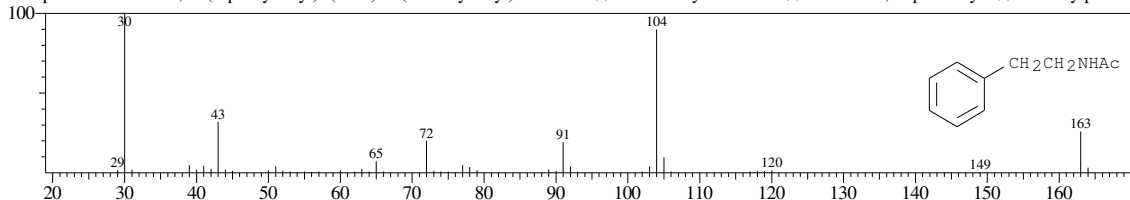

Hit#:2 Entry:52230 Library:WILEY7.LIB

SI:81 Formula:C10 H13 N O CAS:877-95-2 MolWeight:163 RetIndex:0

CompName:Acetamide, N-(2-phenylethyl)- (CAS) N-(2-Phenylethyl)acetamide \$\$ N-Phenethylacetamide \$\$ Acetamide, N-phenethyl- \$\$ N-Acetylpheneth

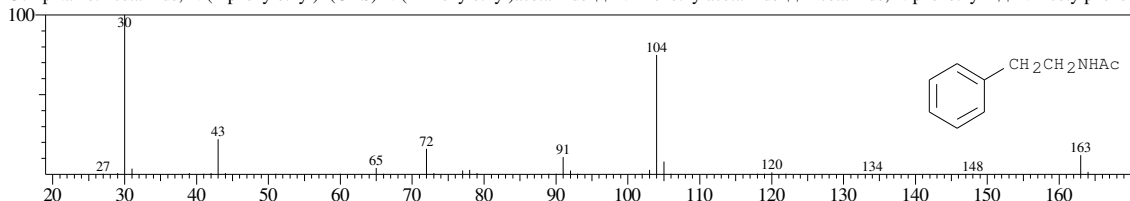

Hit#:3 Entry:52231 Library:WILEY7.LIB

SI:80 Formula:C10 H13 N O CAS:877-95-2 MolWeight:163 RetIndex:0

CompName:Acetamide, N-(2-phenylethyl)- (CAS) N-(2-Phenylethyl)acetamide \$\$ N-Phenethylacetamide \$\$ Acetamide, N-phenethyl- \$\$ N-Acetylpheneth

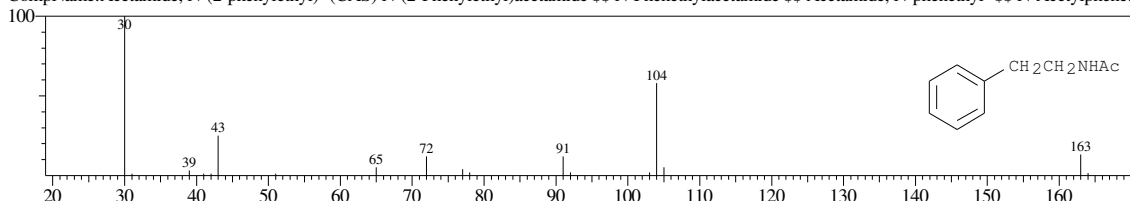

Hit#:4 Entry:52229 Library:WILEY7.LIB

SI:80 Formula:C10 H13 N O CAS:877-95-2 MolWeight:163 RetIndex:0

CompName:Acetamide, N-(2-phenylethyl)- (CAS) N-(2-Phenylethyl)acetamide \$\$ N-Phenethylacetamide \$\$ Acetamide, N-phenethyl- \$\$ N-Acetylpheneth

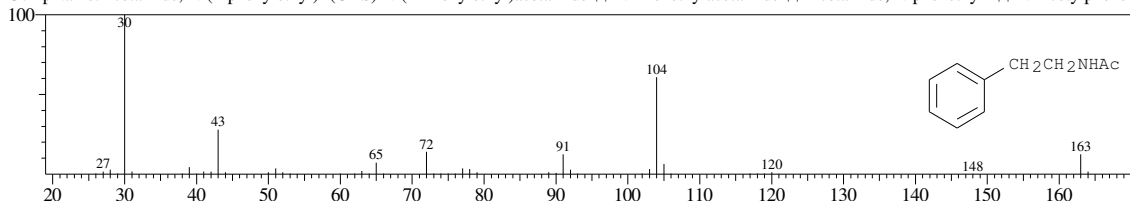

Hit#:5 Entry:52233 Library:WILEY7.LIB

SI:77 Formula:C10 H13 N O CAS:877-95-2 MolWeight:163 RetIndex:0

CompName:Acetamide, N-(2-phenylethyl)- (CAS) N-(2-Phenylethyl)acetamide \$\$ N-Phenethylacetamide \$\$ Acetamide, N-phenethyl- \$\$ N-Acetylpheneth

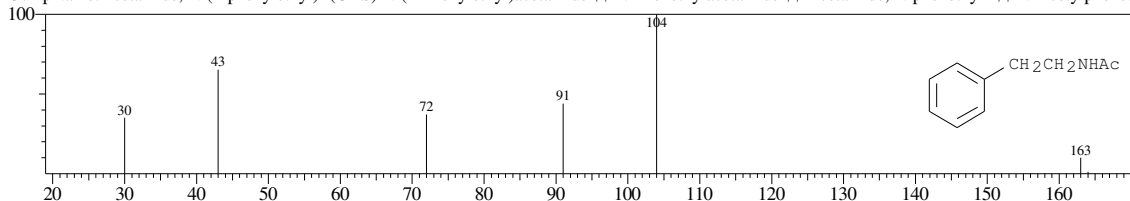

<< Target >>

Line#:22 R.Time:31.220(Scan#:3023) MassPeaks:8

RawMode:Averaged 31.210-31.230(3022-3024) BasePeak:83.05(1917)

BG Mode:Calc. from Peak Group 1 - Event 1

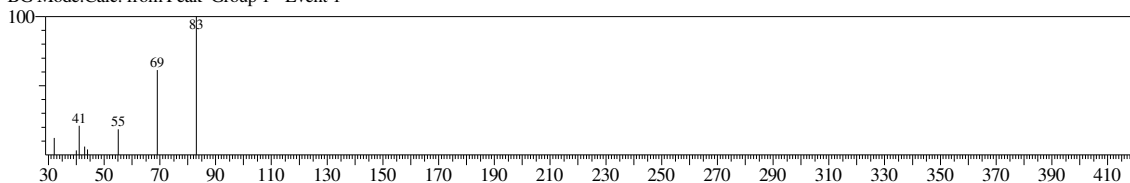

Hit#:1 Entry:290918 Library:WILEY7.LIB

SI:83 Formula:C<sub>25</sub>H<sub>34</sub>O<sub>5</sub> CAS:65526-64-9 MolWeight:414 RetIndex:0

CompName:7.ALPHA.-METHACRYLOYLOXY- OR -TIGLINOYLOXY-9.BETA.-METHACRYCOYLOXY-OR -TIGLIN-OYLOXY-1-OXO-.ALPHA-

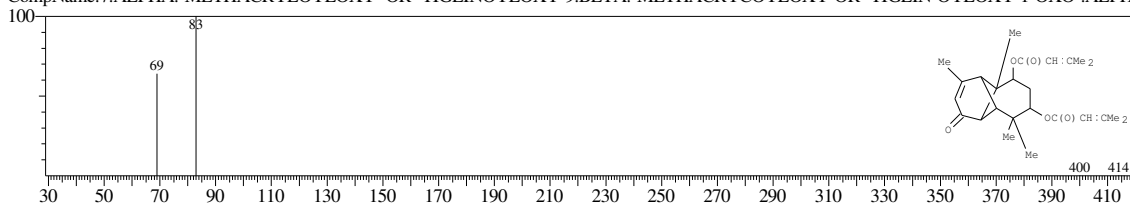

Hit#:2 Entry:284340 Library:WILEY7.LIB

SI:82 Formula:C<sub>24</sub>H<sub>32</sub>O<sub>5</sub> CAS:65526-66-1 MolWeight:400 RetIndex:0

CompName:9.BETA.-METHACRYLOXY- OR -TIGLINOYLOXY-7.ALPHA.-SENECIOYLOXY-1-OXO-.ALPHA.-LONGPINENE \$\$

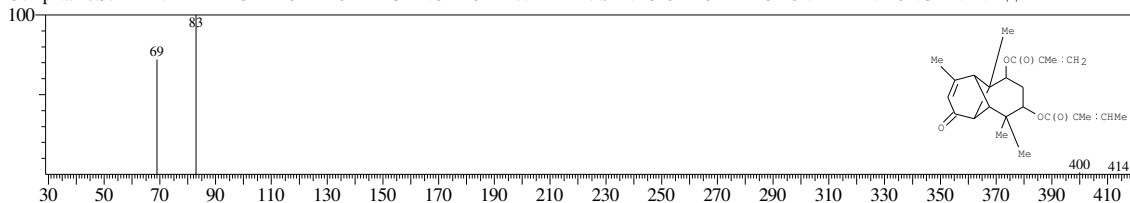

Hit#:3 Entry:29844 Library:WILEY7.LIB

SI:81 Formula:C<sub>9</sub>H<sub>16</sub>O CAS:873-94-9 MolWeight:140 RetIndex:0

CompName:Cyclohexanone, 3,3,5-trimethyl- (CAS) 3,3,5-Trimethylcyclohexanone \$\$ Dihydroisophorone \$\$ CYCLOHEXANON, 3,3,5-TRIMETHYL- \$

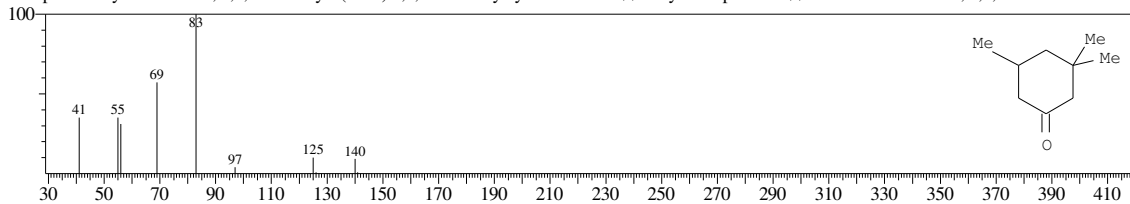

Hit#:4 Entry:74077 Library:WILEY7.LIB

SI:81 Formula:C<sub>13</sub>H<sub>26</sub> CAS:125642-19-5 MolWeight:182 RetIndex:0

CompName:(Z)-2,2-Dimethyl-3-undecene \$\$

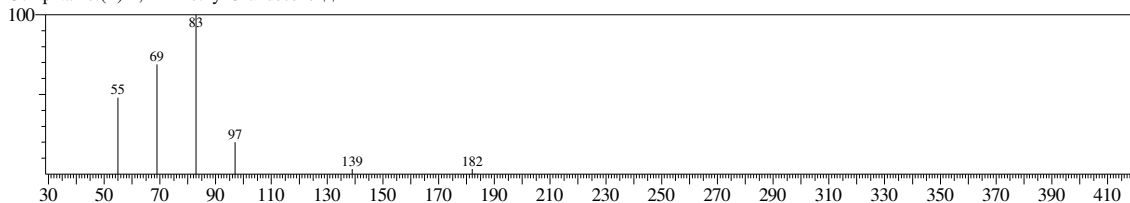

Hit#:5 Entry:90211 Library:WILEY7.LIB

SI:80 Formula:C<sub>12</sub>H<sub>20</sub>O<sub>2</sub> CAS:108584-82-3 MolWeight:196 RetIndex:0

CompName:3-methyl-2-butenyl 2,4-dimethyl-3-pentenoate \$\$ 3-Pentenoic acid, 2,4-dimethyl-, 3-methyl-2-butenyl ester, (S)- (CAS)

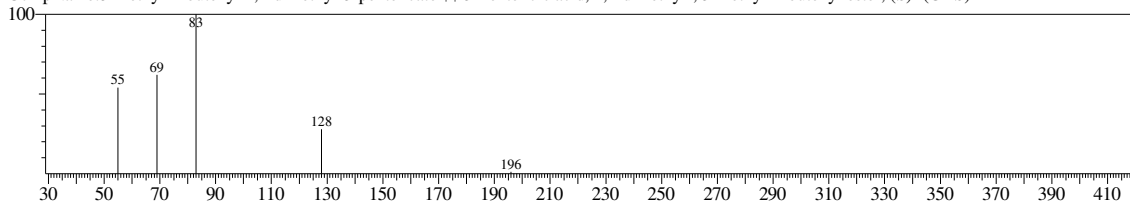



<< Target >>

Line#:23 R.Time:32.060(Scan#:3107) MassPeaks:35

RawMode:Averaged 32.050-32.070(3106-3108) BasePeak:85.05(13969)

BG Mode:Calc. from Peak Group 1 - Event 1

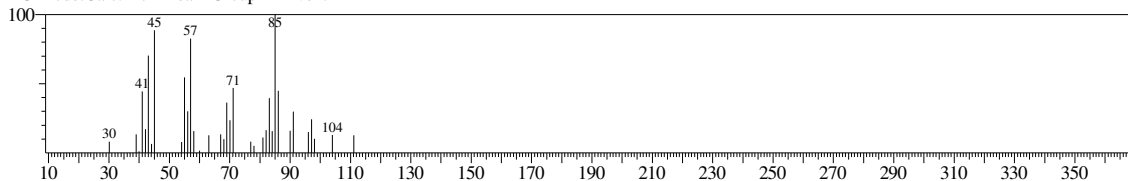

Hit#:1 Entry:274885 Library:WILEY7.LIB

SI:81 Formula:C<sub>26</sub>H<sub>54</sub>O CAS:506-52-5 MolWeight:382 RetIndex:0

CompName:1-Hexacosanol (CAS) HEXACOSANOL-1 \$\$ n-Hexacosanol \$\$ Ceryl alcohol \$\$ Cerylic alcohol \$\$ Hexacosyl alcohol \$\$

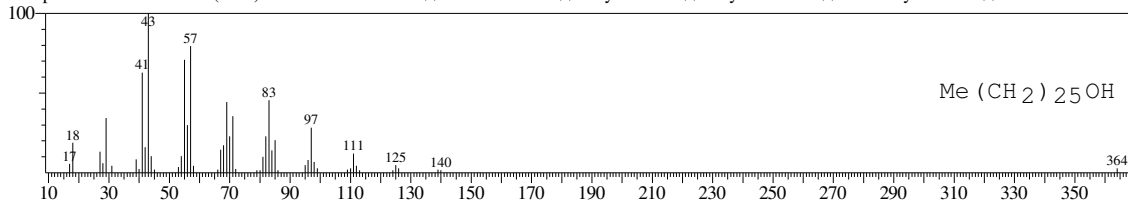

Hit#:2 Entry:207635 Library:WILEY7.LIB

SI:81 Formula:C<sub>20</sub>H<sub>40</sub>O CAS:930-02-9 MolWeight:296 RetIndex:0

CompName:Octadecane, 1-(ethenoxy)- (CAS) Octadecyl vinyl ether \$\$ Vinyl stearyl ether \$\$ Stearyl vinyl ether \$\$ Ether, octadecyl vinyl \$\$ Vinyl octad

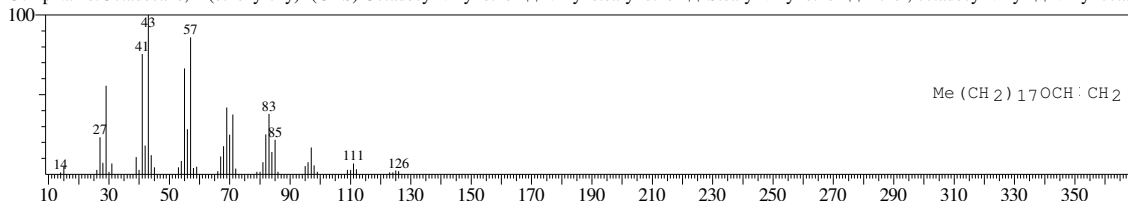

Hit#:3 Entry:209956 Library:WILEY7.LIB

SI:81 Formula:C<sub>20</sub>H<sub>42</sub>O CAS:2456-28-2 MolWeight:298 RetIndex:0

CompName:Decane, 1,1'-oxybis- (CAS) Decyl ether \$\$ Capric ether \$\$ Didecyl ether \$\$ di-n-Decyl ether \$\$

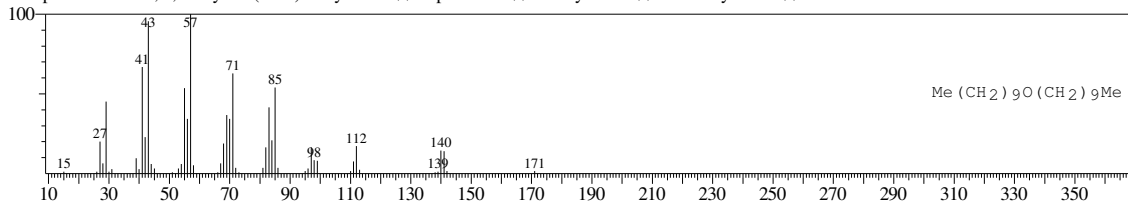

Hit#:4 Entry:224898 Library:WILEY7.LIB

SI:81 Formula:C<sub>20</sub>H<sub>42</sub>O<sub>2</sub> CAS:2136-72-3 MolWeight:314 RetIndex:0

CompName:Ethanol, 2-(octadecyloxy)- (CAS) 2-OCTADECYLOXY ETHANOL \$\$ 2-Octadecoxyethanol \$\$ 2-Octadecyloxyethanol \$\$ Ethylene glycol n

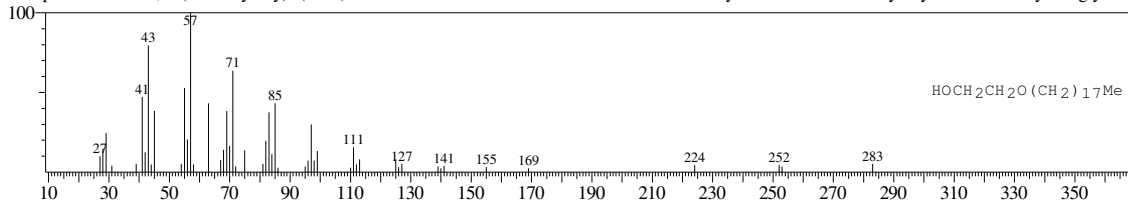

Hit#:5 Entry:197671 Library:WILEY7.LIB

SI:80 Formula:C<sub>18</sub>H<sub>38</sub>O<sub>2</sub> CAS:2136-71-2 MolWeight:286 RetIndex:0

CompName:Ethanol, 2-(hexadecyloxy)- (CAS) 2-HEXADECYLOXYETHANOL \$\$ 2-Hexadecoxyethanol \$\$ 2-HEXADECYLOXY-ETHANOL \$\$ Ethylene glycol

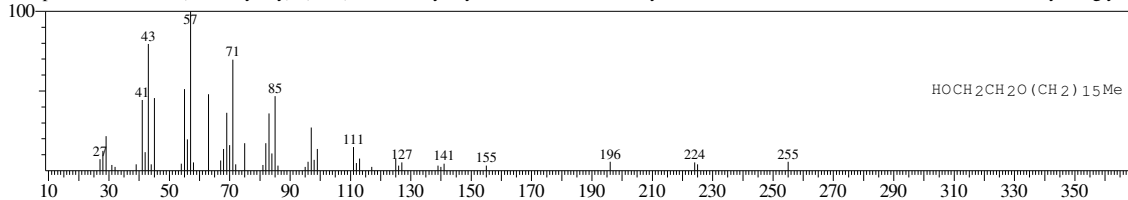

<< Target >>

Line#:24 R.Time:33.430(Scan#:3244) MassPeaks:12

RawMode:Averaged 33.420-33.440(3243-3245) BasePeak:100.05(4600)

BG Mode:Calc. from Peak Group 1 - Event 1

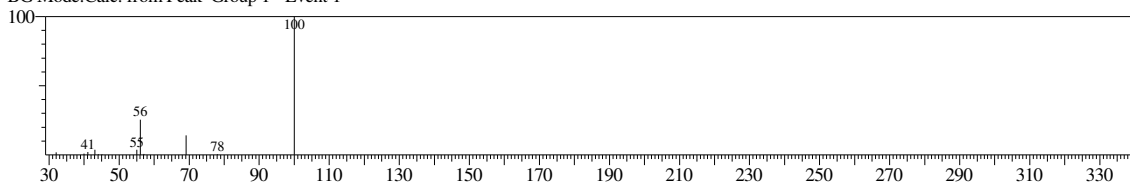

Hit#:1 Entry:111739 Library:WILEY7.LIB

SI:87 Formula:C12 H23 N O2 CAS:116886-03-4 MolWeight:213 RetIndex:0

CompName:1-(3-(morpholin-4-yl)propyl)cyclopentanol \$\$ Cyclopentanol, 1-[3-(4-morpholinyl)propyl]- (CAS)

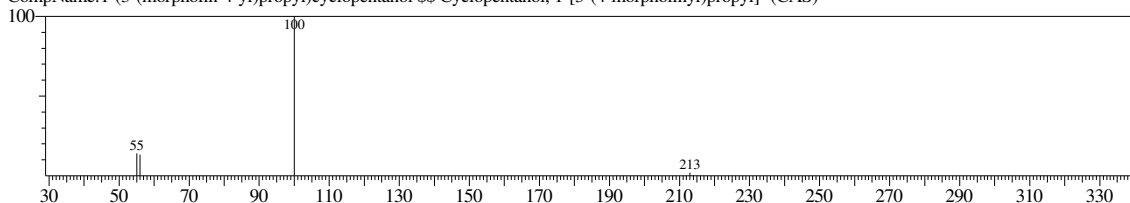

Hit#:2 Entry:238101 Library:WILEY7.LIB

SI:86 Formula:C12 H15 BR N2 O4 CAS:56759-50-3 MolWeight:330 RetIndex:0

CompName:1-(5'-Bromo-2'-nitrophenyl)-2-morpholinoethanol Hydrochloride \$\$ 4-Morpholineethanol, .alpha.-(5-bromo-2-nitrophenyl)-, monohydrochloric

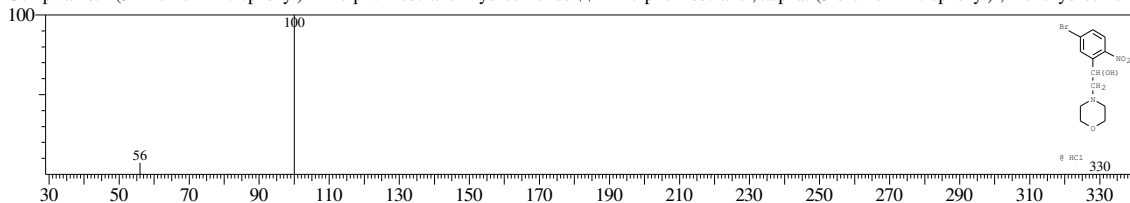

Hit#:3 Entry:264549 Library:WILEY7.LIB

SI:85 Formula:C12 H16 BR CL N2 O4 CAS:0-00-0 MolWeight:366 RetIndex:0

CompName:1-(5'-BROMO-2'-NITROPHENYL)-2-MORPHOLINOETHANOL HYDROCHLORIDE \$\$

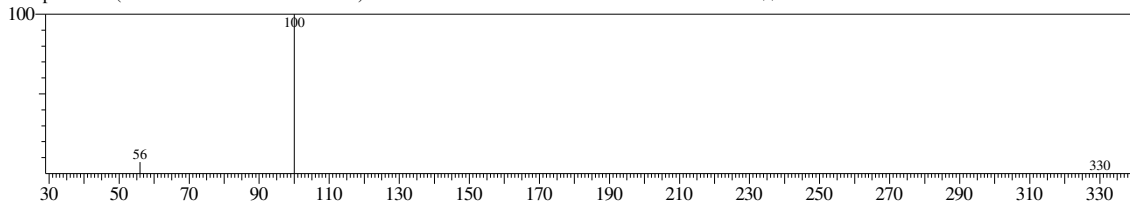

Hit#:4 Entry:111740 Library:WILEY7.LIB

SI:85 Formula:C12 H23 N O2 CAS:116886-09-0 MolWeight:213 RetIndex:0

CompName:1-(2-morpholin-4-yl)ethylcyclohexanol \$\$ Cyclohexanol, 1-[2-(4-morpholinyl)ethyl]- (CAS)

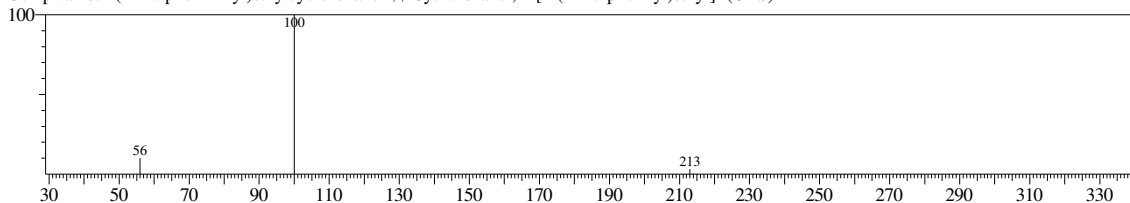

Hit#:5 Entry:238100 Library:WILEY7.LIB

SI:85 Formula:C12 H15 BR N2 O4 CAS:56759-43-4 MolWeight:330 RetIndex:0

CompName:1-(4'-Bromo-3'-nitrophenyl)-2-morpholinoethanol Hydrochloride \$\$ 4-Morpholineethanol, .alpha.-(4-bromo-3-nitrophenyl)-, monohydrochloric

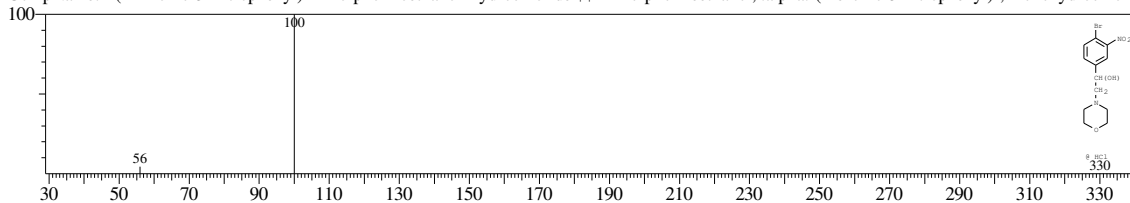

<< Target >>

Line#:25 R.Time:33.680(Scan#:3269) MassPeaks:14

RawMode:Averaged 33.670-33.690(3268-3270) BasePeak:58.05(4085)

BG Mode:Calc. from Peak Group 1 - Event 1

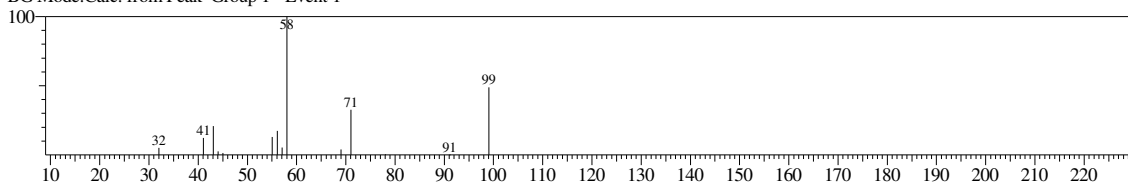

Hit#:1 Entry:30725 Library:WILEY7.LIB

SI:79 Formula:C7 H14 N2 O CAS:925-76-8 MolWeight:142 RetIndex:0

CompName:2-Propenamide, N-[2-(dimethylamino)ethyl]- \$\$ N-(N,N-Dimethylamino)ethyl acrylamide \$\$ Acrylamide, N-(2-(dimethylamino)ethyl)- \$\$

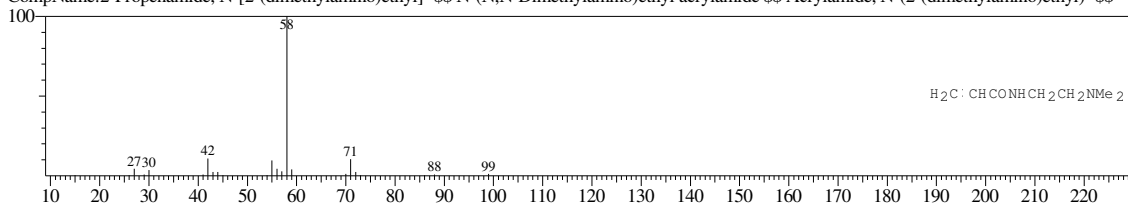

Hit#:2 Entry:31966 Library:WILEY7.LIB

SI:78 Formula:C7 H13 N O2 CAS:2439-35-2 MolWeight:143 RetIndex:0

CompName:2-Propenoic acid, 2-(dimethylamino)ethyl ester \$\$ Dimethylaminoethyl acrylate \$\$ 2-Dimethylaminoethyl acrylate \$\$ N,N-Dimethylaminoethyl

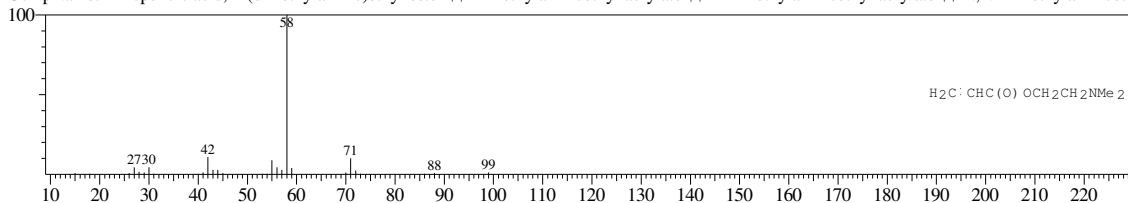

Hit#:3 Entry:19981 Library:WILEY7.LIB

SI:78 Formula:C8 H16 O CAS:20434-34-8 MolWeight:128 RetIndex:0

CompName:Cyclobutanol, 1-butyl- (CAS) 1-Butylcyclobutanol \$\$

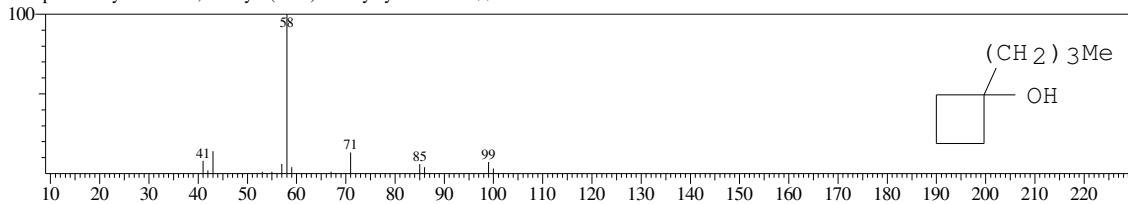

Hit#:4 Entry:77002 Library:WILEY7.LIB

SI:77 Formula:C12 H24 O CAS:110-41-8 MolWeight:184 RetIndex:0

CompName:Undecanal, 2-methyl- (CAS) 2-Methylundecanal \$\$ Aldehyde M.N.A. \$\$ 2-Methyl-1-undecanal \$\$ Methylnonylacetaldehyde \$\$ Methyl n-non

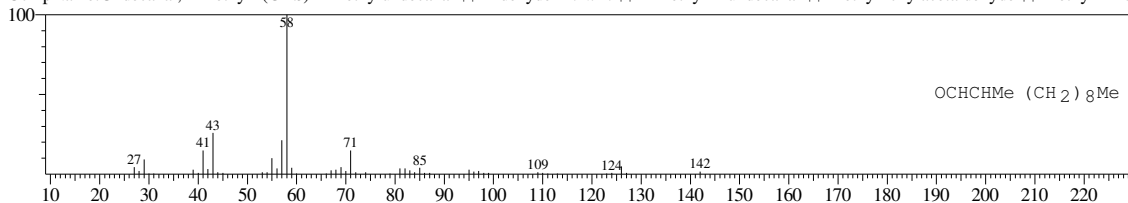

Hit#:5 Entry:129750 Library:WILEY7.LIB

SI:77 Formula:C15 H33 N CAS:17373-29-4 MolWeight:227 RetIndex:0

CompName:N,N-DIMETHYL-TRIDECYLAMINE \$\$

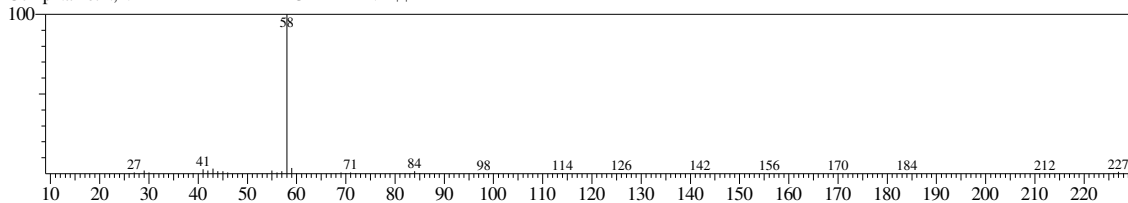

<< Target >>

Line#:26 R.Time:33.920(Scan#:3293) MassPeaks:14

RawMode:Averaged 33.910-33.930(3292-3294) BasePeak:74.05(5962)

BG Mode:Calc. from Peak Group 1 - Event 1

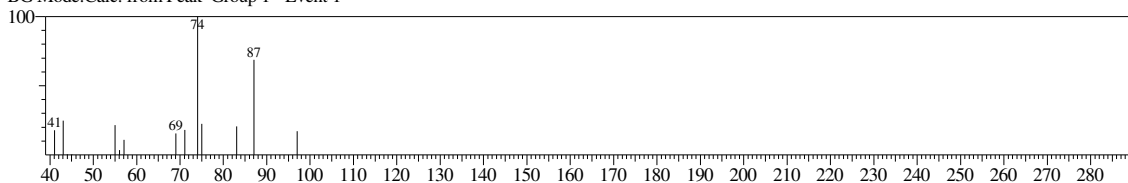

Hit#:1 Entry:78445 Library:WILEY7.LIB

SI:89 Formula:C11 H22 O2 CAS:5129-63-5 MolWeight:186 RetIndex:0

CompName:Nonanoic acid, 7-methyl-, methyl ester (CAS) METHYL 7-METHYLNONANOATE \$\$

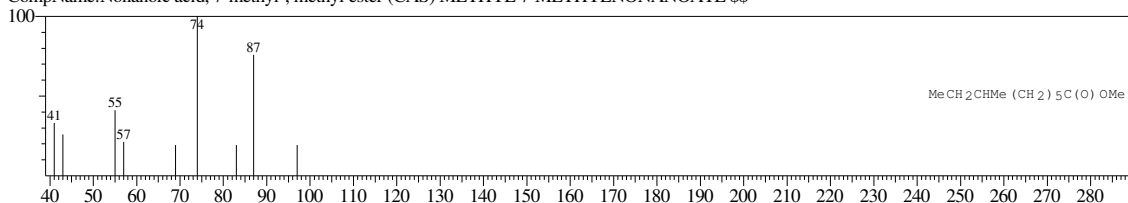

Hit#:2 Entry:209861 Library:WILEY7.LIB

SI:87 Formula:C19 H38 O2 CAS:112-61-8 MolWeight:298 RetIndex:0

CompName:Octadecanoic acid, methyl ester (CAS) Methyl stearate \$\$ Methyl octadecanoate \$\$ Methyl n-octadecanoate \$\$ Stearic acid methyl ester \$\$ Ke

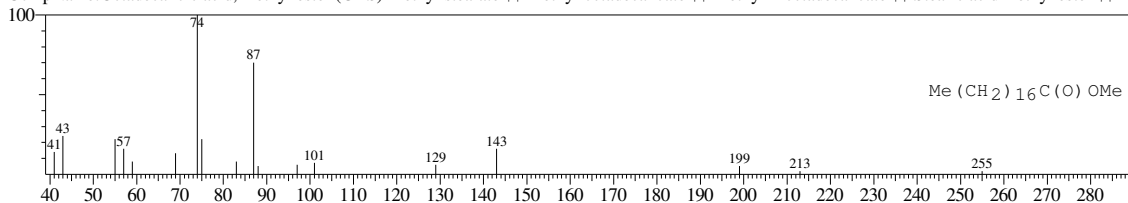

Hit#:3 Entry:180457 Library:WILEY7.LIB

SI:86 Formula:C17 H34 O2 CAS:112-39-0 MolWeight:270 RetIndex:0

CompName:Hexadecanoic acid, methyl ester (CAS) Methyl palmitate \$\$ Methyl hexadecanoate \$\$ Methyl n-hexadecanoate \$\$ Uniphath A60 \$\$ Metholene

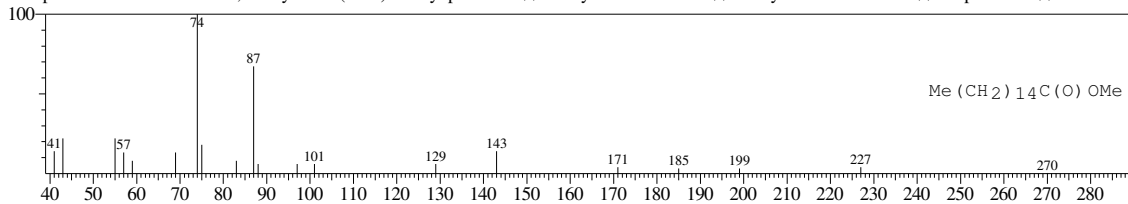

Hit#:4 Entry:195593 Library:WILEY7.LIB

SI:85 Formula:C18 H36 O2 CAS:1731-92-6 MolWeight:284 RetIndex:0

CompName:Heptadecanoic acid, methyl ester (CAS) Methyl heptadecanoate \$\$ Methyl margarate \$\$ Margaric acid methyl ester \$\$ n-Heptadecanoic acid n

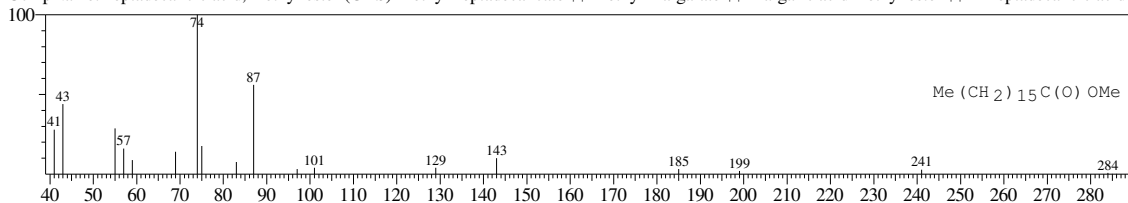

Hit#:5 Entry:95911 Library:WILEY7.LIB

SI:85 Formula:C12 H24 O2 CAS:1731-86-8 MolWeight:200 RetIndex:0

CompName:Undecanoic acid, methyl ester (CAS) Methyl undecanoate \$\$ Methyl ester of undecanoic acid \$\$ METHYL HENDECANOATE \$\$ Methyl un

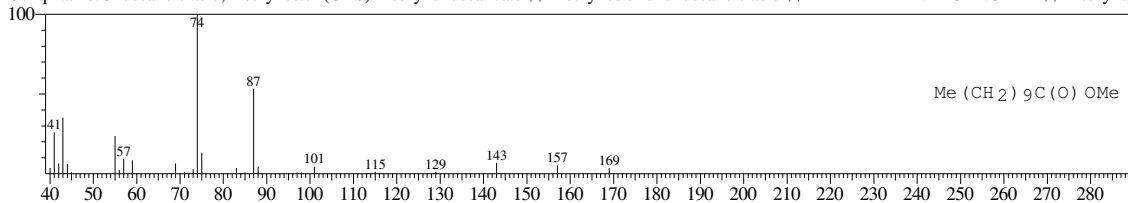

<< Target >>

Line#:27 R.Time:35.080(Scan#:3409) MassPeaks:17

RawMode:Averaged 35.070-35.090(3408-3410) BasePeak:97.05(1023)

BG Mode:Calc. from Peak Group 1 - Event 1

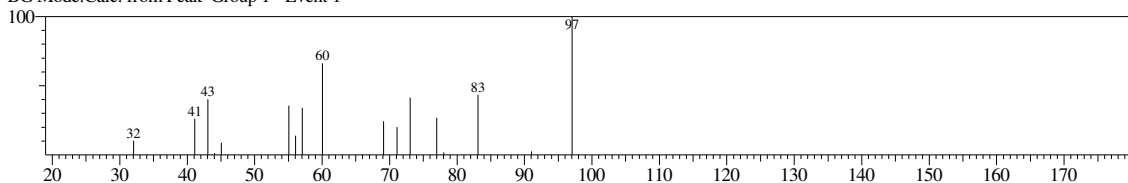

Hit#1 Entry:193358 Library:WILEY7.LIB

SI:73 Formula:C18 H34 O2 CAS:112-80-1 MolWeight:282 RetIndex:0

CompName:9-Octadecenoic acid (Z)- (CAS) Oleic acid \$\$ Red oil \$\$ Oelsauree \$\$ Oleine 7503 \$\$ Pamolyn 100 \$\$ Emersol 211 \$\$ Vopcolene 27 \$\$ cis-C

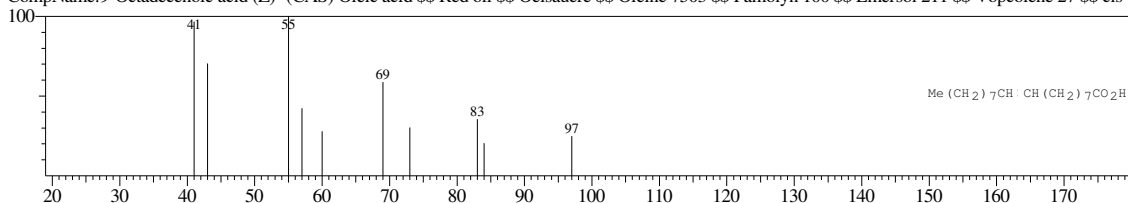

Hit#2 Entry:87969 Library:WILEY7.LIB

SI:72 Formula:C14 H26 CAS:76207-21-1 MolWeight:194 RetIndex:0

CompName:4,4,7,7-Tetramethyldeca-1,9-diene \$\$ 1,9-Decadiene, 4,4,7,7-tetramethyl- (CAS)

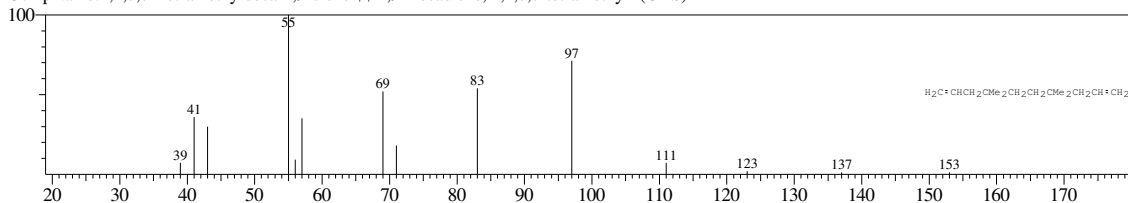

Hit#3 Entry:180843 Library:WILEY7.LIB

SI:71 Formula:C15 H29 N O3 CAS:97-78-9 MolWeight:271 RetIndex:0

CompName:Glycine, N-methyl-N-(1-oxododecyl)- \$\$ Sarcosine, N-lauroyl- \$\$ Hamposyl I \$\$ Lauroyl sarcosine \$\$ Lauroylsarcosine \$\$ Maprosyl I \$\$ N-I

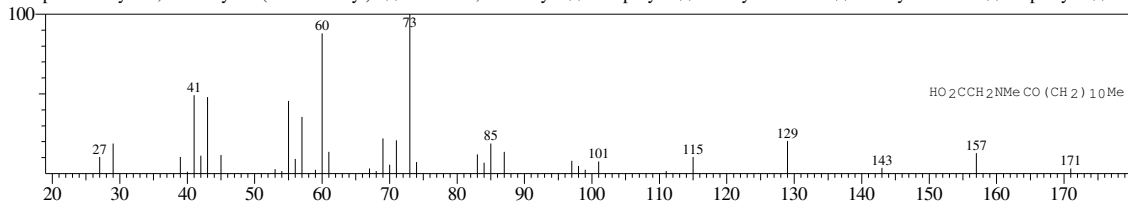

Hit#4 Entry:63226 Library:WILEY7.LIB

SI:71 Formula:C10 H20 O2 CAS:334-48-5 MolWeight:172 RetIndex:0

CompName:Decanoic acid (CAS) Capric acid \$\$ Decoic acid \$\$ Decylic acid \$\$ Caprynic acid \$\$ Caprinic acid \$\$ n-Decoic acid \$\$ n-Capric acid \$\$ n-De

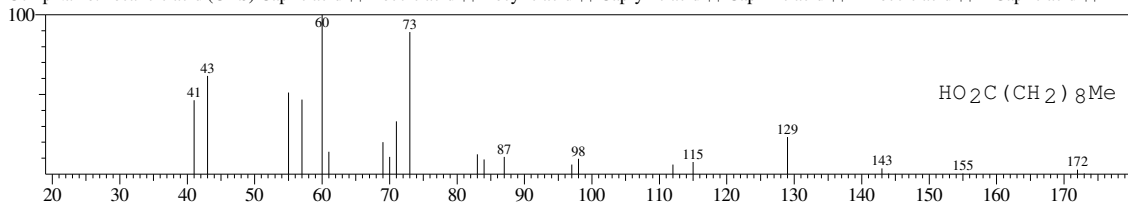

Hit#5 Entry:48024 Library:WILEY7.LIB

SI:71 Formula:C10 H22 O CAS:2051-31-2 MolWeight:158 RetIndex:0

CompName:4-Decanol (CAS) 1-Propylheptyl alcohol \$\$ Decanol-4 \$\$

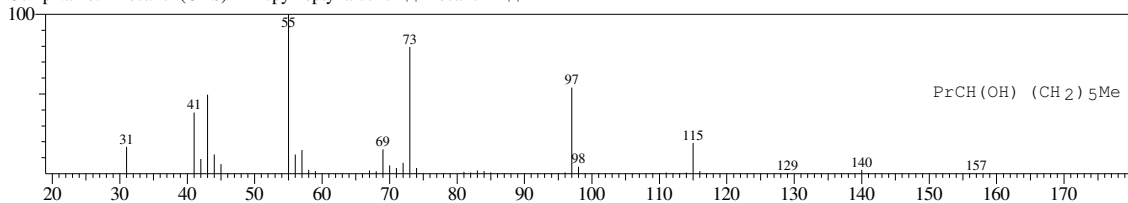

<< Target >>

Line#:28 R.Time:35.340(Scan#:3435) MassPeaks:13

RawMode:Averaged 35.330-35.350(3434-3436) BasePeak:97.10(1061)

BG Mode:Calc. from Peak Group 1 - Event 1

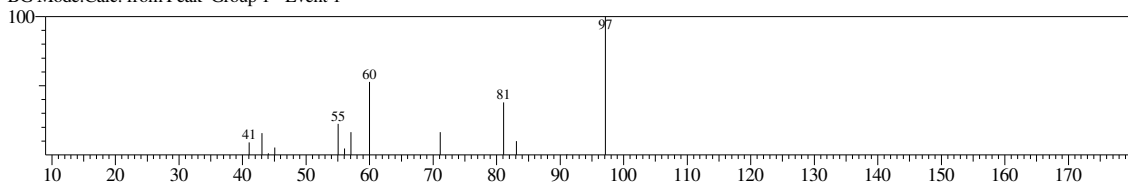

Hit#:1 Entry:29858 Library:WILEY7.LIB

SI:70 Formula:C<sub>9</sub>H<sub>16</sub>O CAS:15158-56-2 MolWeight:140 RetIndex:0

CompName:BICYCLO(3.3.1)NONAN-1-OL \$\$ Bicyclo[3.3.1]nonan-1-ol (CAS)

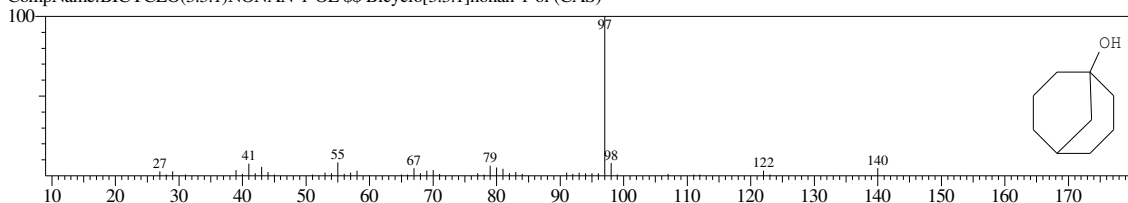

Hit#:2 Entry:67050 Library:WILEY7.LIB

SI:70 Formula:C<sub>7</sub>H<sub>13</sub>Br CAS:13905-48-1 MolWeight:176 RetIndex:0

CompName:Cyclohexane, 1-bromo-3-methyl- (CAS) 1-METHYL-3-BROMOCYCLOHEXANE \$\$ m-Methylcyclohexyl bromide \$\$

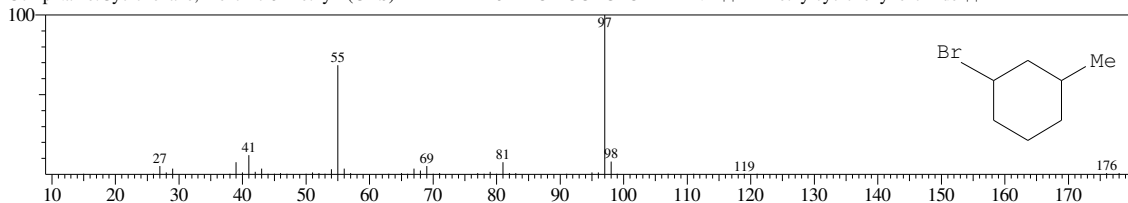

Hit#:3 Entry:29141 Library:WILEY7.LIB

SI:69 Formula:C<sub>9</sub>H<sub>16</sub>O CAS:32064-77-0 MolWeight:140 RetIndex:0

CompName:5-Nonen-4-one (CAS) NONA-5-ENE-4-ONE \$\$

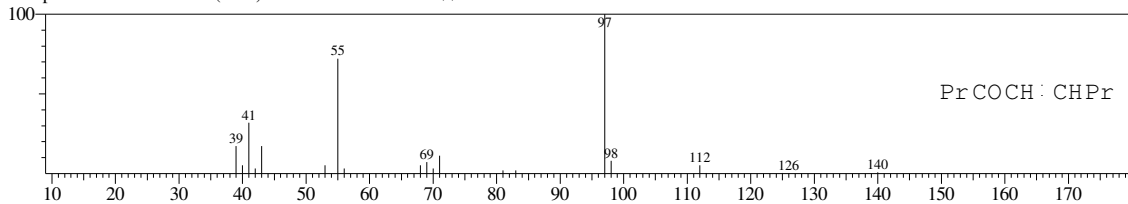

Hit#:4 Entry:66118 Library:WILEY7.LIB

SI:69 Formula:C<sub>7</sub>H<sub>13</sub>Br CAS:6294-40-2 MolWeight:176 RetIndex:0

CompName:Cyclohexane, 1-bromo-4-methyl- (CAS) 1-METHYL-4-BROMOCYCLOHEXANE \$\$ p-Methylcyclohexyl bromide \$\$ 4-Methylcyclohexyl b

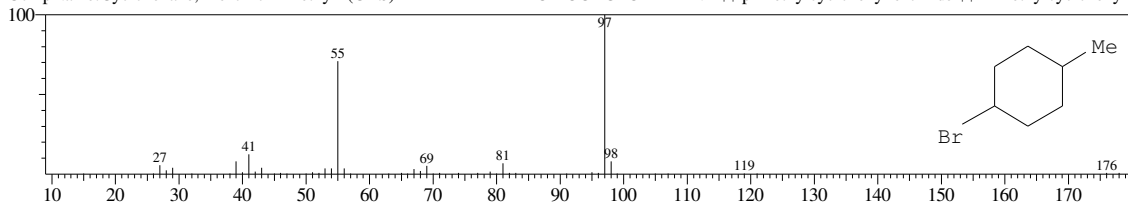

Hit#:5 Entry:23051 Library:WILEY7.LIB

SI:68 Formula:C<sub>7</sub>H<sub>13</sub>Cl CAS:14123-41-2 MolWeight:132 RetIndex:0

CompName:1-CHLORO-2,2,3,3-TETRAMETHYLCYCLOPROPANE \$\$ 3-CHLORO-1,1,2,2-TETRAMETHYL-CYCLOPROPANE \$\$ CYCLOPROPAN

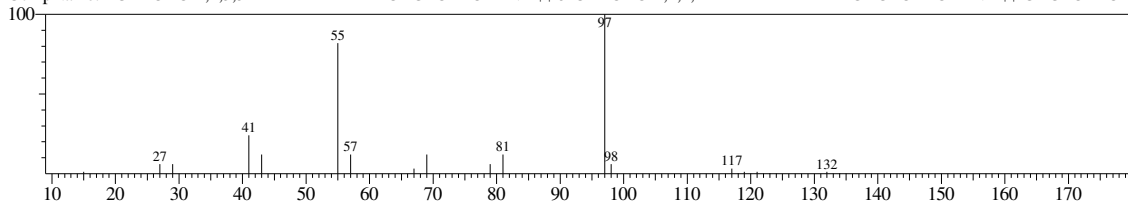

<< Target >>

Line#:29 R.Time:35.600(Scan#:3461) MassPeaks:23

RawMode:Averaged 35.590-35.610(3460-3462) BasePeak:73.05(2624)

BG Mode:Calc. from Peak Group 1 - Event 1

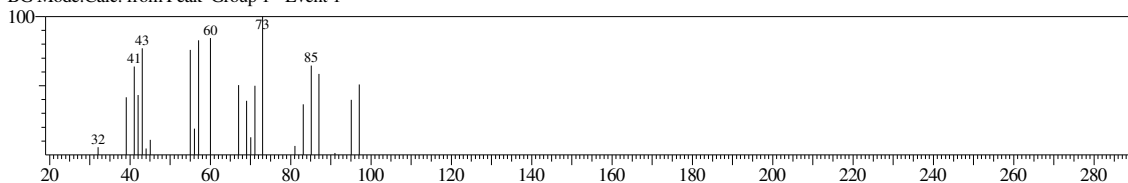

Hit#1 Entry:195573 Library:WILEY7.LIB

SI:80 Formula:C18 H36 O2 CAS:57-11-4 MolWeight:284 RetIndex:0

CompName:Octadecanoic acid (CAS) Stearic acid \$\$ n-Octadecanoic acid \$\$ PD 185 \$\$ NAA 173 \$\$ Vanicol \$\$ Kam 3000 \$\$ Kam 1000 \$\$ Kam 2000 \$\$

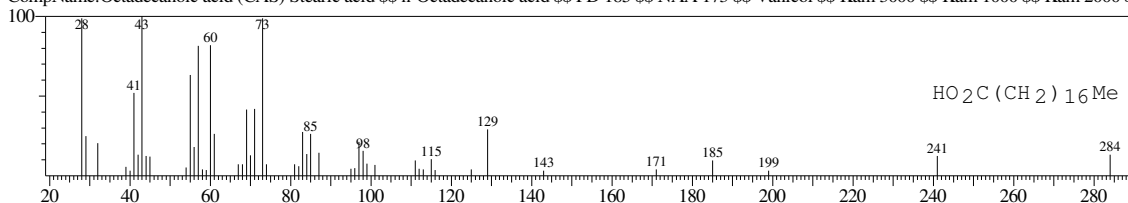

Hit#2 Entry:148359 Library:WILEY7.LIB

SI:80 Formula:C15 H30 O2 CAS:1002-84-2 MolWeight:242 RetIndex:0

CompName:Pentadecanoic acid (CAS) Pentadecylic acid \$\$ n-Pentadecanoic acid \$\$ n-Pentadecylic acid \$\$ Pentadecylic acid \$\$ PENTADECANSAEUR

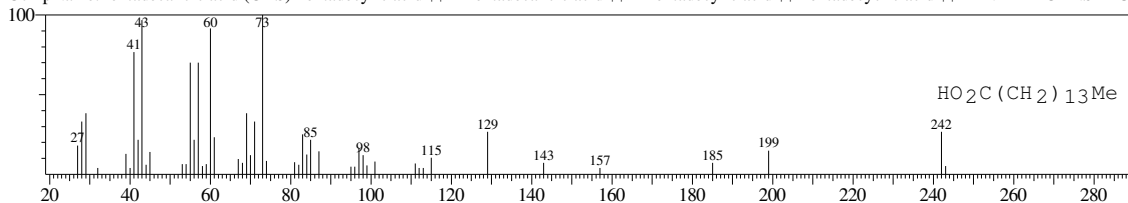

Hit#3 Entry:193348 Library:WILEY7.LIB

SI:80 Formula:C18 H34 O2 CAS:112-80-1 MolWeight:282 RetIndex:0

CompName:9-Octadecenoic acid (Z)- (CAS) Oleic acid \$\$ Red oil \$\$ Oelsauere \$\$ Oleine 7503 \$\$ Pamolyn 100 \$\$ Emersol 211 \$\$ Vopcolene 27 \$\$ cis-C

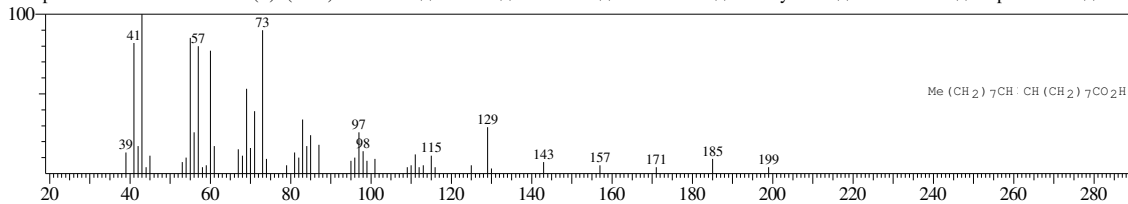

Hit#4 Entry:164469 Library:WILEY7.LIB

SI:79 Formula:C16 H32 O2 CAS:57-10-3 MolWeight:256 RetIndex:0

CompName:Hexadecanoic acid (CAS) Palmitic acid \$\$ Palmitinic acid \$\$ n-Hexadecoic acid \$\$ n-Hexadecanoic acid \$\$ Pentadecanecarboxylic acid \$\$ 1-I

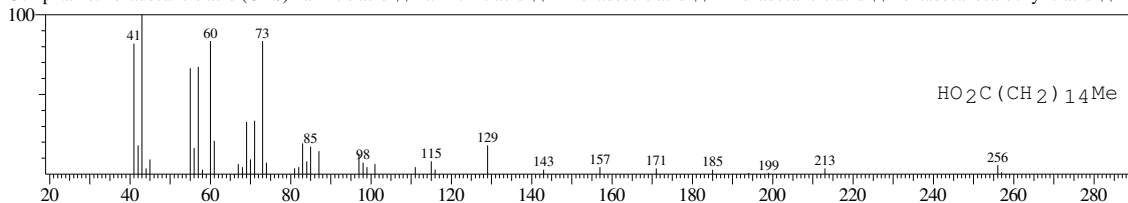

Hit#5 Entry:164459 Library:WILEY7.LIB

SI:79 Formula:C16 H32 O2 CAS:57-10-3 MolWeight:256 RetIndex:0

CompName:Hexadecanoic acid (CAS) Palmitic acid \$\$ Palmitinic acid \$\$ n-Hexadecoic acid \$\$ n-Hexadecanoic acid \$\$ Pentadecanecarboxylic acid \$\$ 1-I

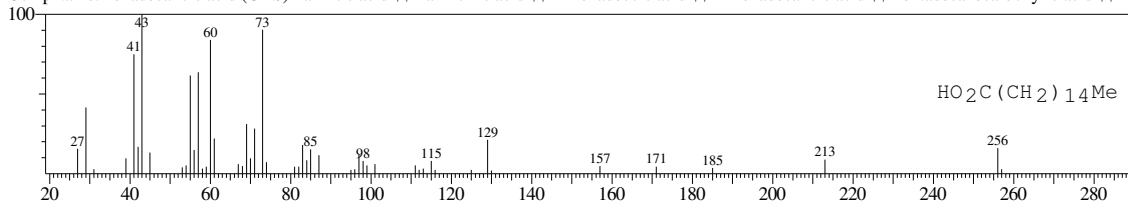

<< Target >>

Line#:30 R.Time:36.300(Scan#:3531) MassPeaks:24

RawMode:Averaged 36.290-36.310(3530-3532) BasePeak:45.05(3348)

BG Mode:Calc. from Peak Group 1 - Event 1

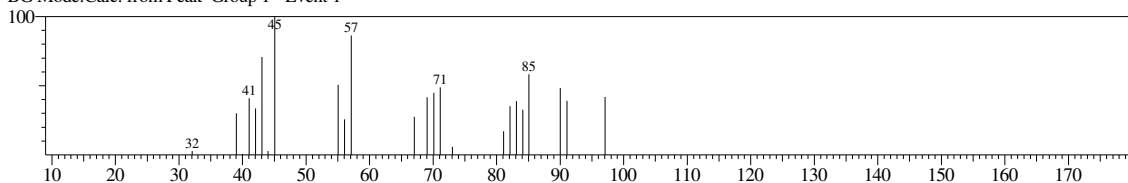

Hit#1 Entry:33499 Library:WILEY7.LIB

SI:79 Formula:C9 H20 O CAS:19780-40-6 MolWeight:144 RetIndex:0

CompName:2-Heptanol, 5-ethyl- (CAS) 5-Ethyl-2-heptanol \$\$

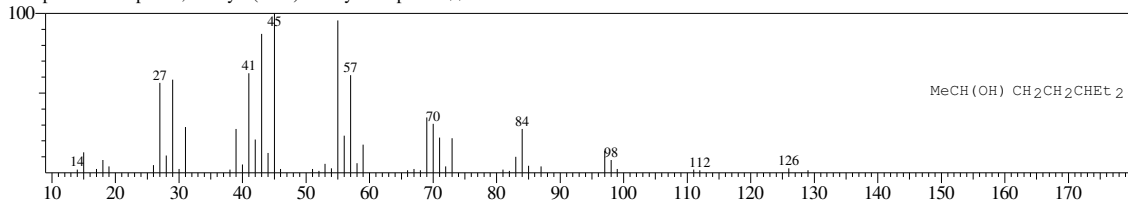

Hit#2 Entry:32934 Library:WILEY7.LIB

SI:78 Formula:C9 H20 O CAS:818-81-5 MolWeight:144 RetIndex:0

CompName:1-OCTANOL, 2-METHYL- \$\$

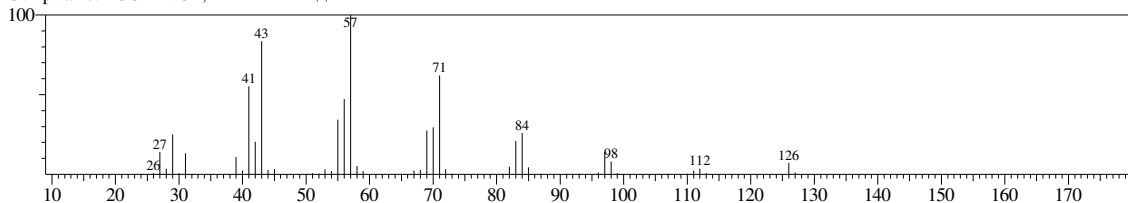

Hit#3 Entry:209617 Library:WILEY7.LIB

SI:78 Formula:C20 H42 O CAS:0-00-0 MolWeight:298 RetIndex:0

CompName:Diisodecyl ether \$\$

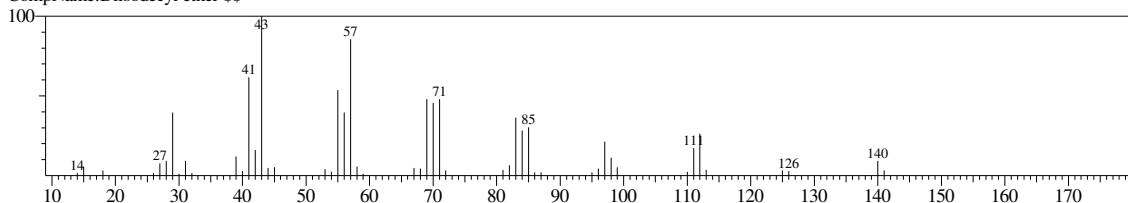

Hit#4 Entry:209956 Library:WILEY7.LIB

SI:78 Formula:C20 H42 O CAS:2456-28-2 MolWeight:298 RetIndex:0

CompName:Decane, 1,1'-oxybis- (CAS) Decyl ether \$\$ Capric ether \$\$ Didecyl ether \$\$ di-n-Decyl ether \$\$

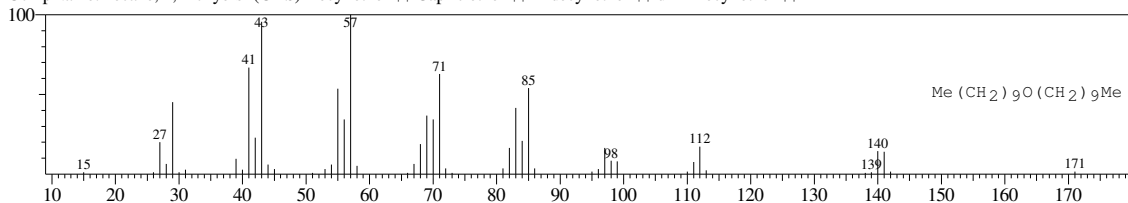

Hit#5 Entry:46064 Library:WILEY7.LIB

SI:77 Formula:C10 H20 O CAS:112-31-2 MolWeight:156 RetIndex:0

CompName:Decanal (CAS) n-Decanal \$\$ Decyl aldehyde \$\$ Decaldehyde \$\$ Capraldehyde \$\$ Aldehyde C10 \$\$ Decanaldehyde \$\$ n-Decaldehyde \$\$ Cap

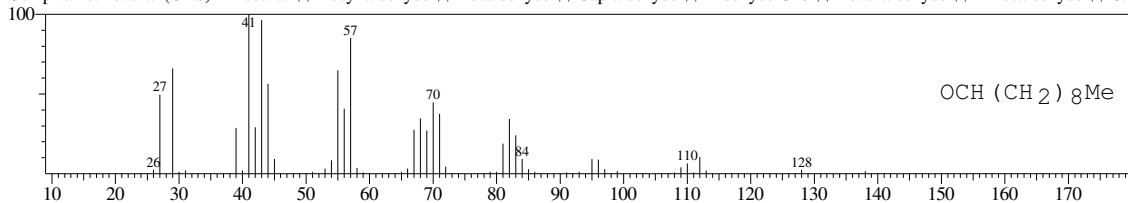



<< Target >>

Line#:31 R.Time:37.040(Scan#:3605) MassPeaks:11

RawMode:Averaged 37.030-37.050(3604-3606) BasePeak:81.05(672)

BG Mode:Calc. from Peak Group 1 - Event 1

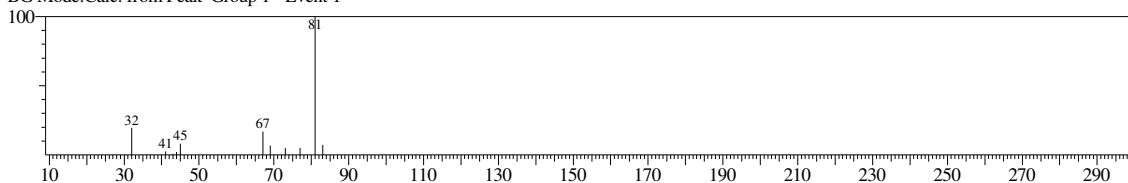

Hit#1 Entry:5651 Library:WILEY7.LIB

SI:78 Formula:C6 H10 O CAS:52884-23-8 MolWeight:98 RetIndex:0

CompName:3R\*,4R\*)-3,4-DIMETHYL-1-BUTYN-4-OL \$\$ 4-Pentyn-2-ol, 3-methyl-, (R\*,R\*)- (CAS)

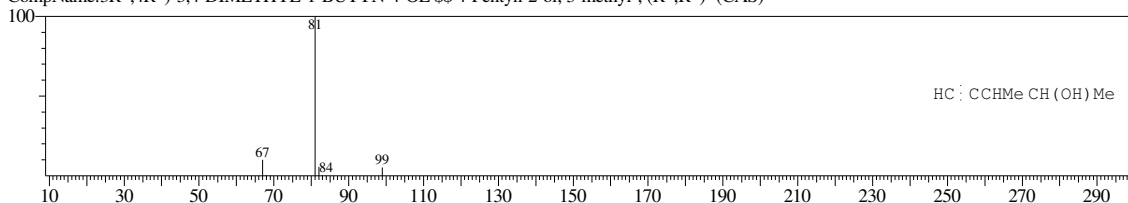

Hit#2 Entry:36269 Library:WILEY7.LIB

SI:75 Formula:C3 H4 Cl F3 O CAS:425-87-6 MolWeight:148 RetIndex:0

CompName:Ethane, 2-chloro-1,1,2-trifluoro-1-methoxy- (CAS) 2-Chloro-1,1,2-trifluoroethyl methyl ether \$\$ Ether, 2-chloro-1,1,2-trifluoroethyl methyl \$\$

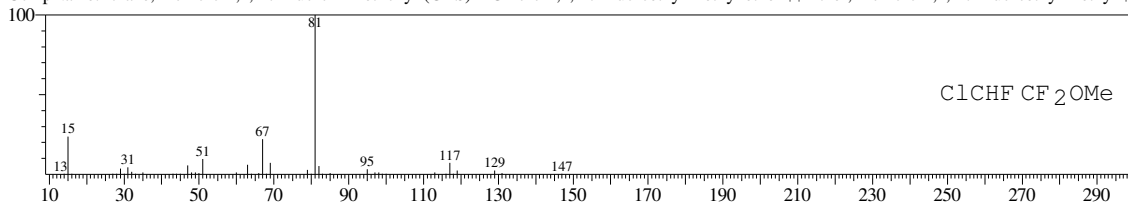

Hit#3 Entry:205496 Library:WILEY7.LIB

SI:75 Formula:C19 H34 O2 CAS:0-00-0 MolWeight:294 RetIndex:0

CompName:methyl octadeca-13,14-dienoate \$\$

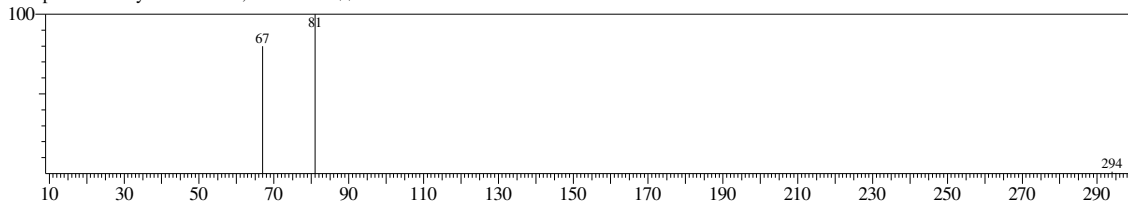

Hit#4 Entry:36270 Library:WILEY7.LIB

SI:74 Formula:C3 H4 Cl F3 O CAS:425-87-6 MolWeight:148 RetIndex:0

CompName:Ethane, 2-chloro-1,1,2-trifluoro-1-methoxy- (CAS) 2-Chloro-1,1,2-trifluoroethyl methyl ether \$\$ Ether, 2-chloro-1,1,2-trifluoroethyl methyl \$\$

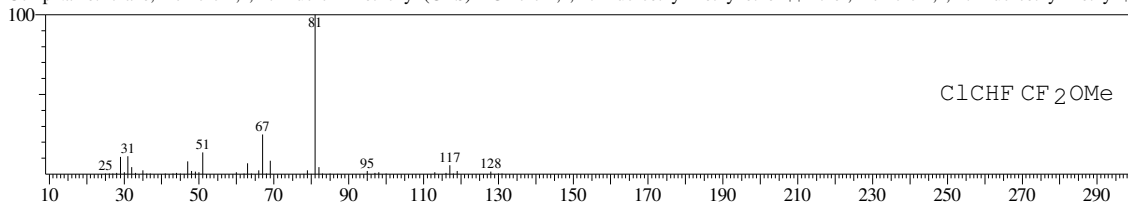

Hit#5 Entry:137820 Library:WILEY7.LIB

SI:74 Formula:C15 H22 O2 CAS:85432-07-1 MolWeight:234 RetIndex:0

CompName:2-[[5-Methyl-1-(1-methylethenyl)-5-hexenyloxy]methyl]furan \$\$ Furan, 2-[[[5-methyl-1-(1-methylethenyl)-5-hexenyl]oxy]methyl]- (CAS)

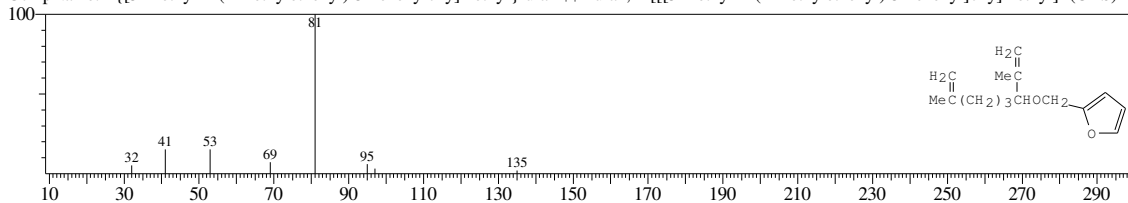

<< Target >>

Line#:32 R.Time:37.220(Scan#:3623) MassPeaks:15

RawMode:Averaged 37.210-37.230(3622-3624) BasePeak:81.10(1051)

BG Mode:Calc. from Peak Group 1 - Event 1

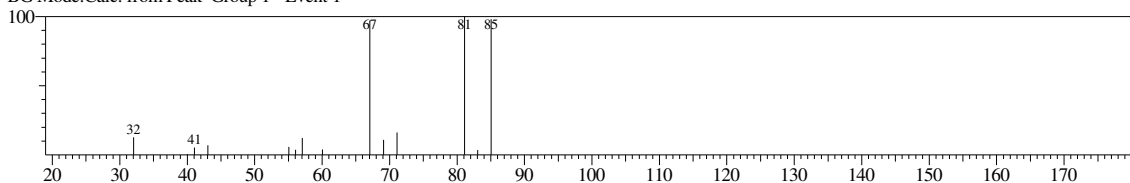

Hit#1 Entry:64455 Library:WILEY7.LIB

SI:79 Formula:C9 H18 O3 CAS:0-00-0 MolWeight:174 RetIndex:0

CompName:6-(Allyloxy)hexane-1,2-diol \$\$

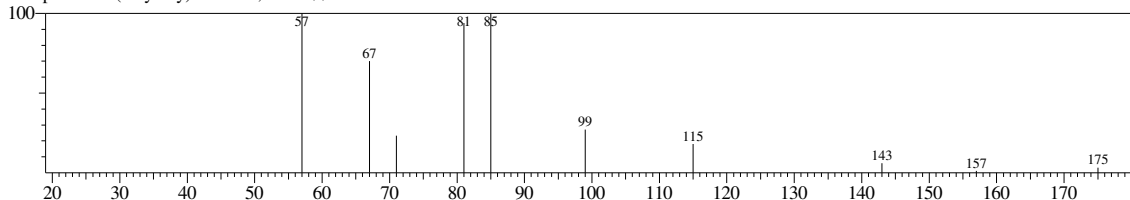

Hit#2 Entry:18255 Library:WILEY7.LIB

SI:76 Formula:C7 H10 O2 CAS:0-00-0 MolWeight:126 RetIndex:0

CompName:1,6-Dioxaspiro[4.4]non-3-ene \$\$

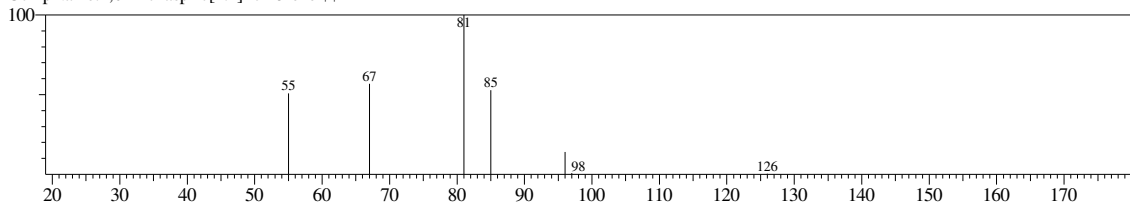

Hit#3 Entry:19730 Library:WILEY7.LIB

SI:70 Formula:C7 H12 O2 CAS:17160-89-3 MolWeight:128 RetIndex:0

CompName:Ethanone, 1-(1-hydroxycyclopentyl)- (CAS) Ketone, 1-hydroxycyclopentyl methyl (CAS) 1-Acetylcyclopentanol \$\$ 1-Acetyl-1-cyclopentanol

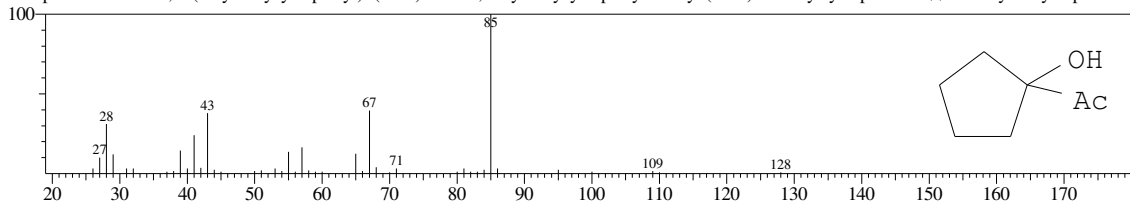

Hit#4 Entry:20331 Library:WILEY7.LIB

SI:70 Formula:C7 H12 O2 CAS:105-21-5 MolWeight:128 RetIndex:0

CompName:2(3H)-Furanone, dihydro-5-propyl- (CAS) 5-N-PROPYL-.GAMMA.-BUTYROLACTONE \$\$ .gamma.-Heptalactone \$\$ .gamma.-Heptanolac

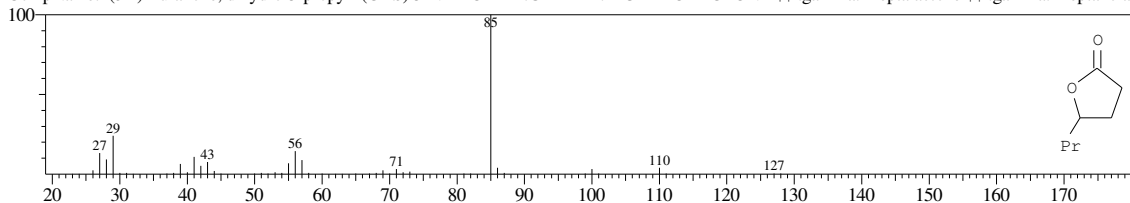

Hit#5 Entry:145912 Library:WILEY7.LIB

SI:70 Formula:C16 H32 O CAS:0-00-0 MolWeight:240 RetIndex:0

CompName:2-Undecyl-tetrahydropyran \$\$

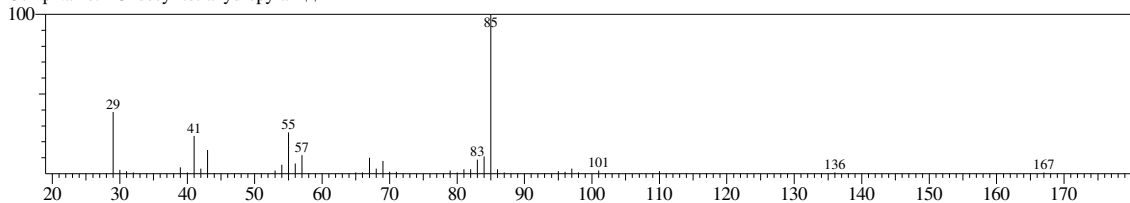

<< Target >>

Line#:33 R.Time:37.580(Scan#:3659) MassPeaks:12

RawMode:Averaged 37.570-37.590(3658-3660) BasePeak:97.05(1022)

BG Mode:Calc. from Peak Group 1 - Event 1

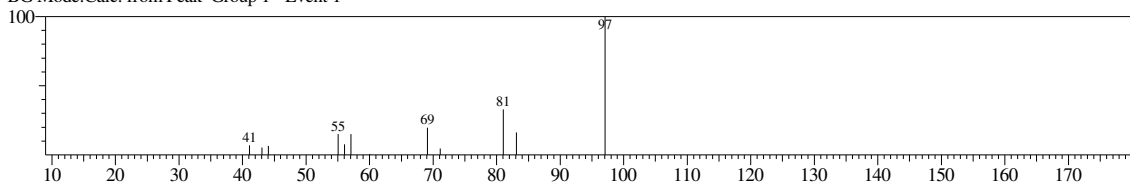

Hit#1 Entry:29097 Library:WILEY7.LIB

SI:79 Formula:C8 H16 N2 CAS:22581-50-6 MolWeight:140 RetIndex:0

CompName:2-Pyrazoline, 1-butyl-5-methyl- (CAS) 5-Methyl-1-n-butyl-.DELTA.[2]-pyrazoline \$\$

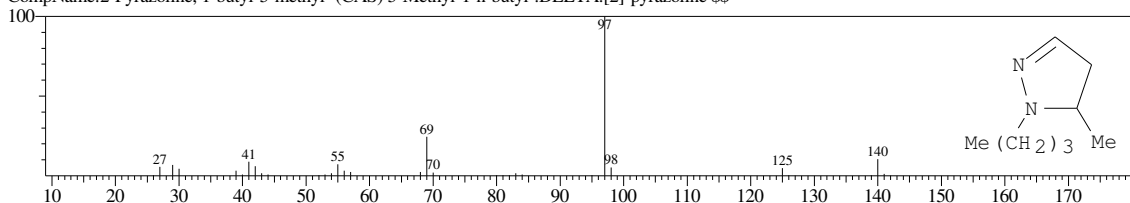

Hit#2 Entry:55039 Library:WILEY7.LIB

SI:79 Formula:C10 H14 O2 CAS:75363-59-6 MolWeight:166 RetIndex:0

CompName:2H-Pyran-2-one, 5,6-dihydro-6-(2-pentenyl)-, (Z)- (CAS)

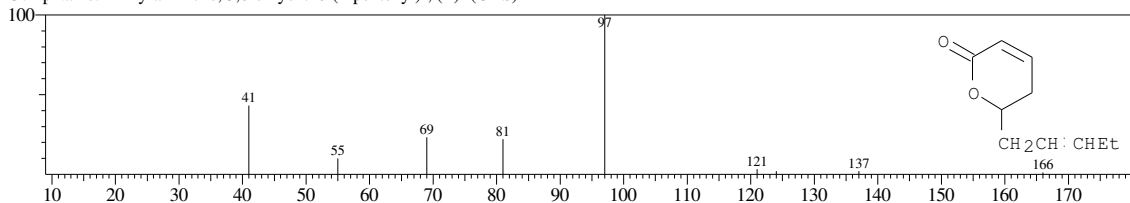

Hit#3 Entry:55038 Library:WILEY7.LIB

SI:79 Formula:C10 H14 O2 CAS:67010-60-0 MolWeight:166 RetIndex:0

CompName:(Z)-6-(Pent-2-enyl)-5,6-dihydropyran-2-one \$\$ 2H-Pyran-2-one, 5,6-dihydro-6-(2-pentenyl)-, (Z)-(.+.)- (CAS) (.+.)-Tuberolactone \$\$

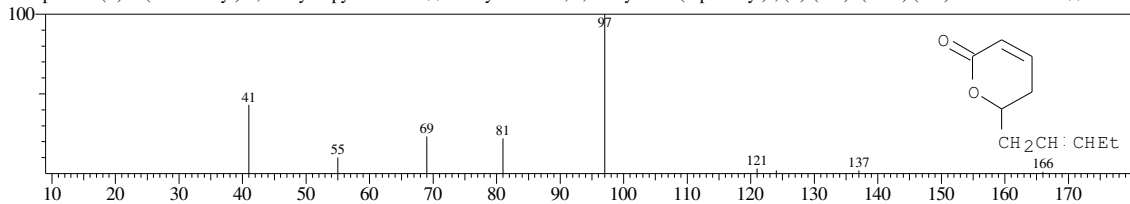

Hit#4 Entry:67050 Library:WILEY7.LIB

SI:77 Formula:C7 H13 BR CAS:13905-48-1 MolWeight:176 RetIndex:0

CompName:Cyclohexane, 1-bromo-3-methyl- (CAS) 1-METHYL-3-BROMOCYCLOHEXANE \$\$ m-Methylcyclohexyl bromide \$\$

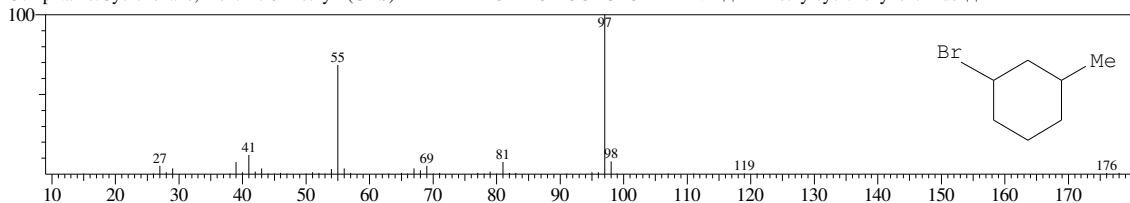

Hit#5 Entry:42258 Library:WILEY7.LIB

SI:77 Formula:C8 H10 O3 CAS:19261-13-3 MolWeight:154 RetIndex:0

CompName:3-Butene-1,2-diol, 1-(2-furanyl)- (CAS) 1-(2-FURANYL)BUT-3-ENE-1,2-DIOL \$\$ 3-Butene-1,2-diol, 1-(2-furyl)- \$\$

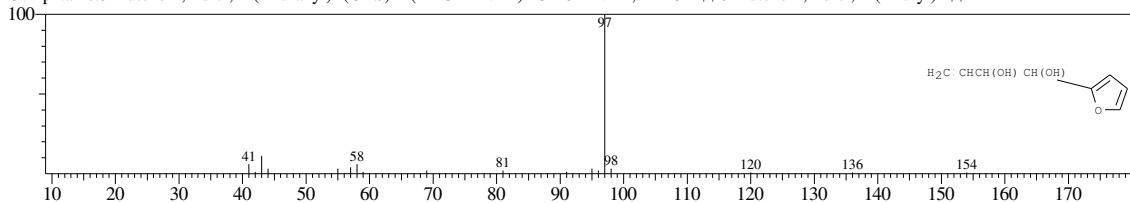

<< Target >>

Line#:34 R.Time:38.000(Scan#:3701) MassPeaks:17

RawMode:Averaged 37.990-38.010(3700-3702) BasePeak:100.05(1036)

BG Mode:Calc. from Peak Group 1 - Event 1

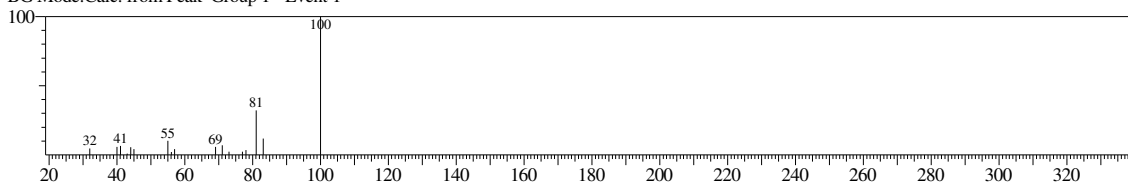

Hit#1 Entry:245978 Library:WILEY7.LIB

SI:77 Formula:C22 H45 N O CAS:16528-77-1 MolWeight:339 RetIndex:0

CompName:MORPHOLINE, 4-OCTADECYL- \$\$

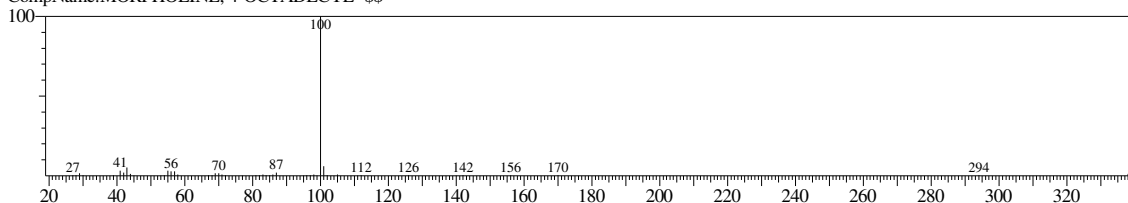

Hit#2 Entry:106942 Library:WILEY7.LIB

SI:77 Formula:C14 H27 N CAS:62238-25-9 MolWeight:209 RetIndex:0

CompName:4,9-Decadien-2-amine, N-butyl- (CAS) BUTYLAMIN, N-(4,9-DECADIEN-2-YL)- \$\$

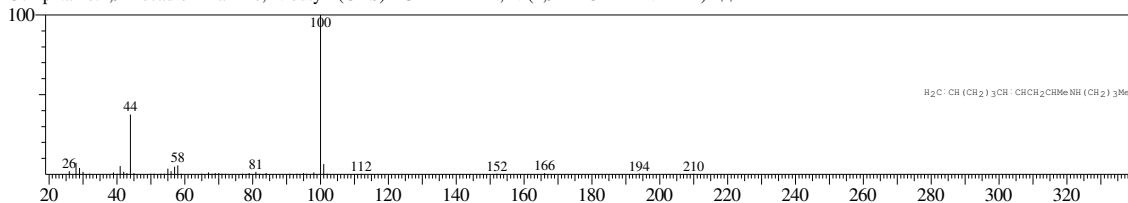

Hit#3 Entry:104306 Library:WILEY7.LIB

SI:75 Formula:C14 H25 N CAS:62238-22-6 MolWeight:207 RetIndex:0

CompName:4,7,9-Decatrien-2-amine, N-butyl- (CAS) BUTYLAMINE, N-(4,7,9-DECATRIEN-2-YL)- \$\$

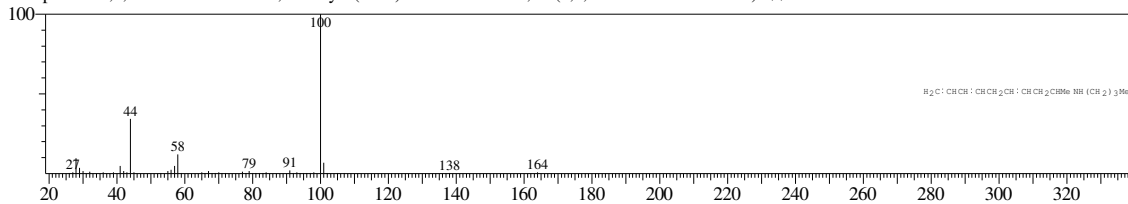

Hit#4 Entry:31994 Library:WILEY7.LIB

SI:75 Formula:C7 H13 N O2 CAS:0-00-0 MolWeight:143 RetIndex:0

CompName:2-(E)-HEXENSAEURE, (4S)-AMINO-5-METHYL- \$\$

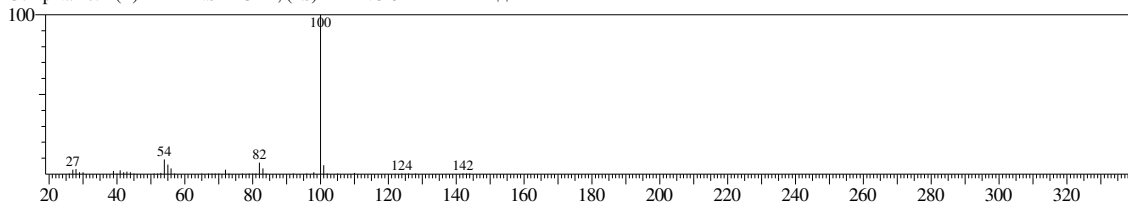

Hit#5 Entry:111909 Library:WILEY7.LIB

SI:74 Formula:C14 H31 N CAS:62238-18-0 MolWeight:213 RetIndex:0

CompName:2-Decanamine, N-butyl- (CAS) BUTYLAMIN, N-2-DECYL- \$\$

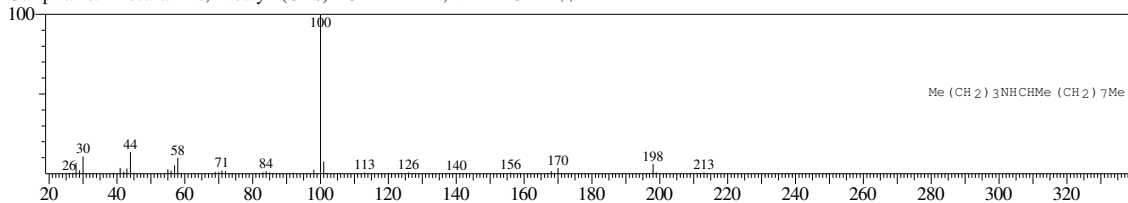

<< Target >>

Line#:35 R.Time:38.440(Scan#:3745) MassPeaks:26

RawMode:Averaged 38.430-38.450(3744-3746) BasePeak:74.00(1587)

BG Mode:Calc. from Peak Group 1 - Event 1

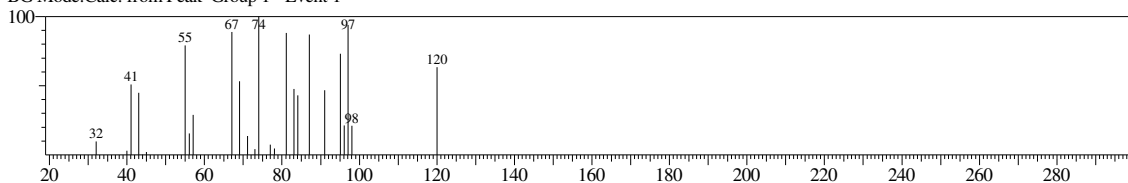

Hit#1 Entry:61148 Library:WILEY7.LIB

SI:76 Formula:C10 H18 O2 CAS:20681-51-0 MolWeight:170 RetIndex:0

CompName:METHYLESTER OF 3-CYCLOHEXYL-PROPIONIC ACID \$\$ Cyclohexanepropanoic acid, methyl ester (CAS) Cyclohexanepropanoic acid,

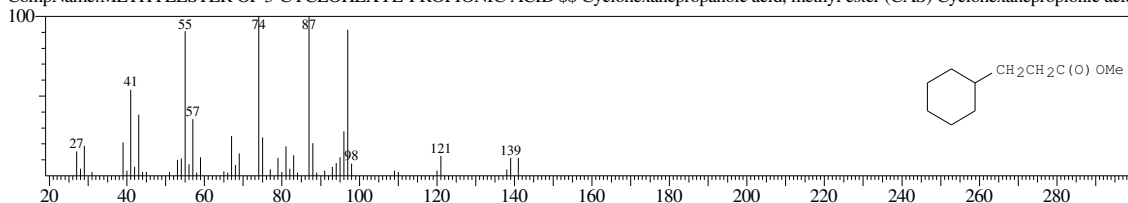

Hit#2 Entry:61150 Library:WILEY7.LIB

SI:74 Formula:C10 H18 O2 CAS:20681-51-0 MolWeight:170 RetIndex:0

CompName:METHYLESTER OF 3-CYCLOHEXYL-PROPIONIC ACID \$\$ Cyclohexanepropanoic acid, methyl ester (CAS) Cyclohexanepropanoic acid,

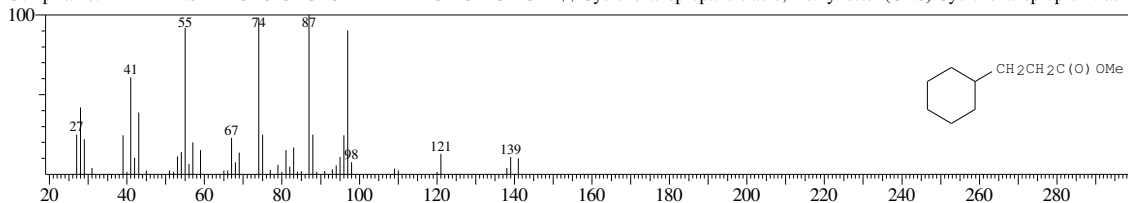

Hit#3 Entry:234094 Library:WILEY7.LIB

SI:71 Formula:C21 H40 O2 CAS:27070-40-2 MolWeight:324 RetIndex:0

CompName:Eicosenoic acid, methyl ester (CAS) METHYL EICOSENOATE \$\$

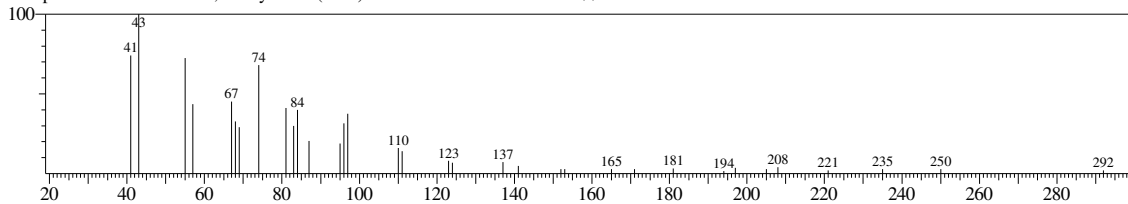

Hit#4 Entry:207850 Library:WILEY7.LIB

SI:71 Formula:C19 H36 O2 CAS:52355-31-4 MolWeight:296 RetIndex:0

CompName:6-Octadecenoic acid, methyl ester (CAS) Methyl 6-octadecenoate \$\$

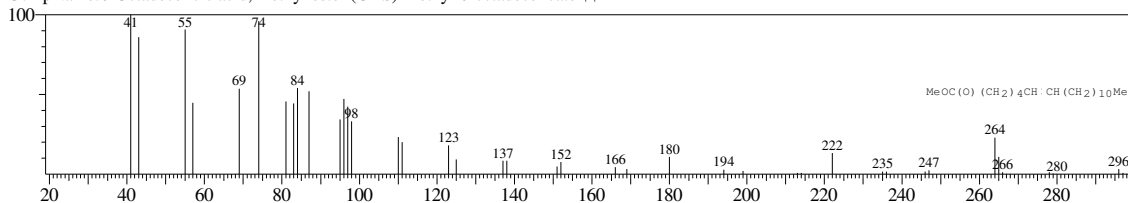

Hit#5 Entry:177667 Library:WILEY7.LIB

SI:71 Formula:C17 H32 O2 CAS:56875-67-3 MolWeight:268 RetIndex:0

CompName:7-Hexadecenoic acid, methyl ester, (Z)- \$\$

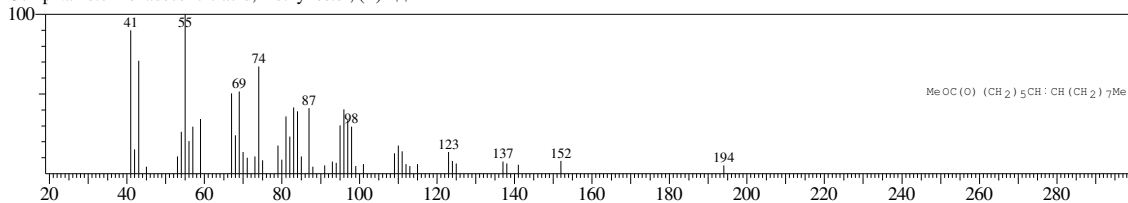

<< Target >>

Line#:36 R.Time:38.950(Scan#:3796) MassPeaks:30

RawMode:Averaged 38.940-38.960(3795-3797) BasePeak:67.05(5127)

BG Mode:Calc. from Peak Group 1 - Event 1

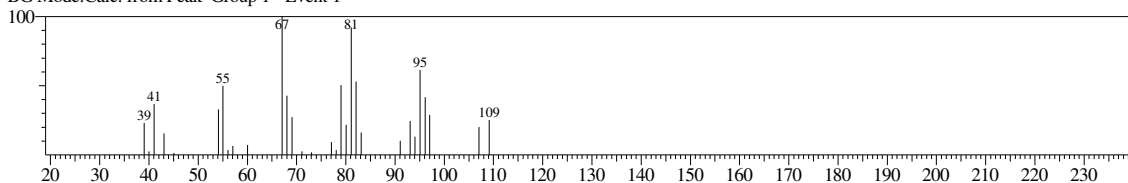

Hit#1 Entry:143860 Library:WILEY7.LIB

SI:85 Formula:C16 H30 O CAS:765-17-3 MolWeight:238 RetIndex:0

CompName:Bombykol \$\$ E-10, Z-12-Hexadecadien-1-ol \$\$ 10,12-Hexadecadien-1-ol, (Z,E)- (CAS) Bombycol \$\$ 10,12-Hexadecadien-1-ol, (E,Z)- \$\$

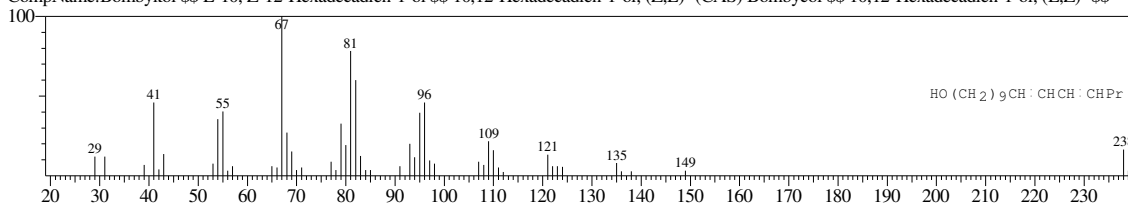

Hit#2 Entry:87967 Library:WILEY7.LIB

SI:85 Formula:C14 H26 CAS:35216-11-6 MolWeight:194 RetIndex:0

CompName:7-Tetradecyne (CAS)

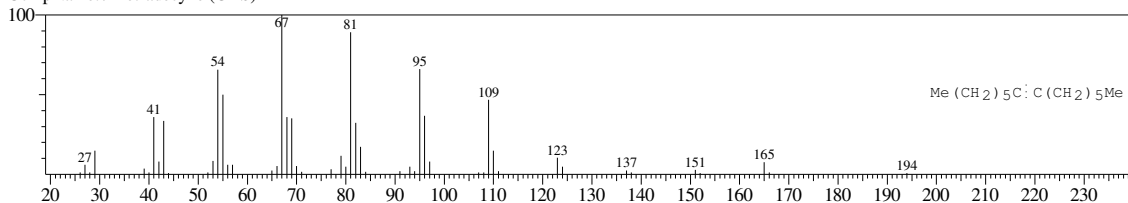

Hit#3 Entry:17366 Library:WILEY7.LIB

SI:85 Formula:C9 H16 CAS:13152-05-1 MolWeight:124 RetIndex:0

CompName:CYCLOOCTENE, 3-METHYL- \$\$

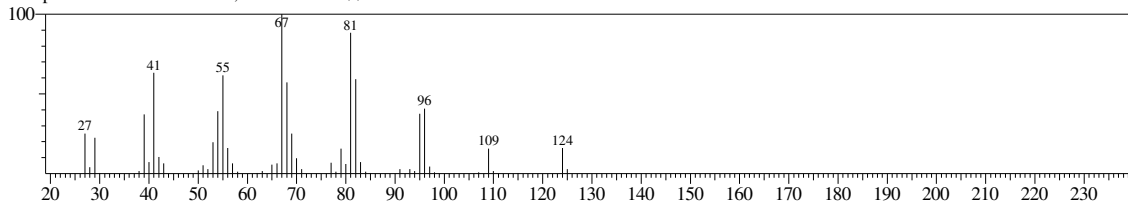

Hit#4 Entry:33402 Library:WILEY7.LIB

SI:85 Formula:C8 H16 O2 CAS:3971-29-7 MolWeight:144 RetIndex:0

CompName:1,2-Cyclohexanedimethanol (CAS) CYCLOHEXAN, 1,2-BIS(HYDROXYMETHYL)- \$\$ 1,2-Bis(hydroxymethyl)cyclohexane \$\$

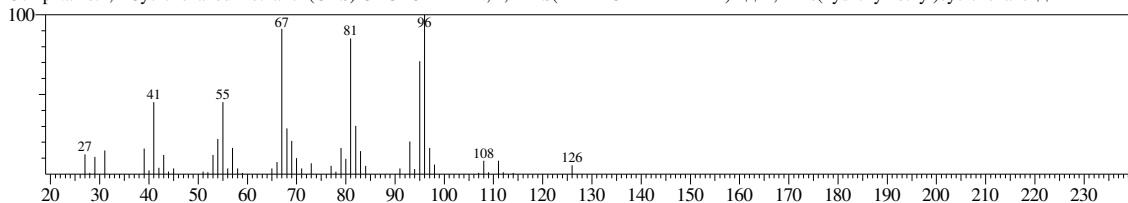

Hit#5 Entry:157380 Library:WILEY7.LIB

SI:84 Formula:C18 H34 CAS:71899-42-8 MolWeight:250 RetIndex:0

CompName:5-Octadecyne (CAS)

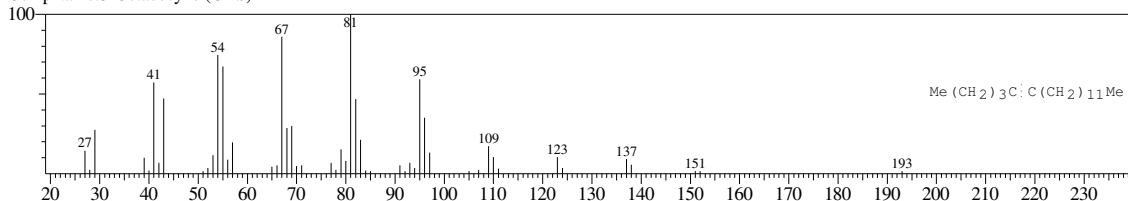

<< Target >>

Line#:37 R.Time:39.610(Scan#:3862) MassPeaks:12

RawMode:Averaged 39.600-39.620(3861-3863) BasePeak:39.05(1026)

BG Mode:Calc. from Peak Group 1 - Event 1

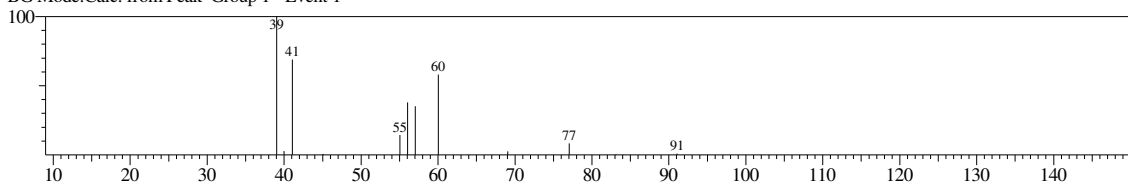

Hit#1 Entry:4660 Library:WILEY7.LIB

SI:78 Formula:C4 H9 CL CAS:507-20-0 MolWeight:92 RetIndex:0

CompName:Propane, 2-chloro-2-methyl- (CAS) tert-Butyl chloride \$\$ 2-Chloro-2-methylpropane \$\$ 2-Chloroisobutane \$\$ Trimethylchloromethane \$\$ Ter

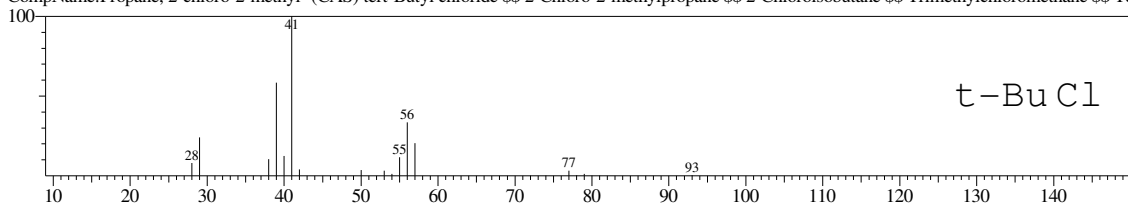

Hit#2 Entry:30570 Library:WILEY7.LIB

SI:75 Formula:C6 H10 N2 O2 CAS:6939-25-9 MolWeight:142 RetIndex:0

CompName:Sydnone, 3-(1,1-dimethylethyl)- (CAS) 3-tert-Butylsydnone \$\$ N-tert-Butylsydnone \$\$ Sydnone, 3-tert-butyl- \$\$

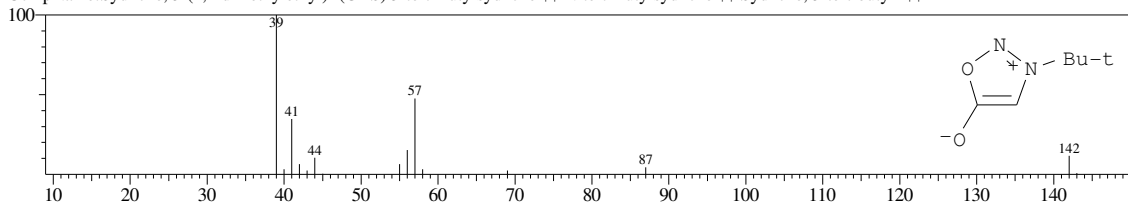

Hit#3 Entry:423 Library:WILEY7.LIB

SI:74 Formula:C4 H8 CAS:115-11-7 MolWeight:56 RetIndex:0

CompName:1-Propene, 2-methyl- (CAS) 2-Methylpropene \$\$ Isobutene \$\$ iso-Butene \$\$ Isobutylene \$\$ .gamma.-Butylene \$\$ Propene, 2-methyl- \$\$ 2-Me

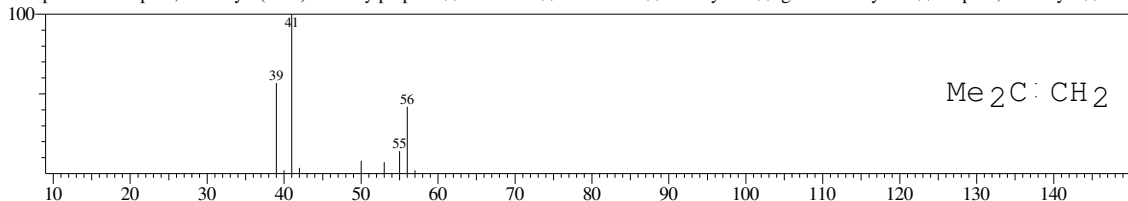

Hit#4 Entry:8156 Library:WILEY7.LIB

SI:74 Formula:C4 H9 N O2 CAS:627-05-4 MolWeight:103 RetIndex:0

CompName:Butane, 1-nitro- (CAS) 1-Nitrobutane \$\$ n-C4H9NO2 \$\$

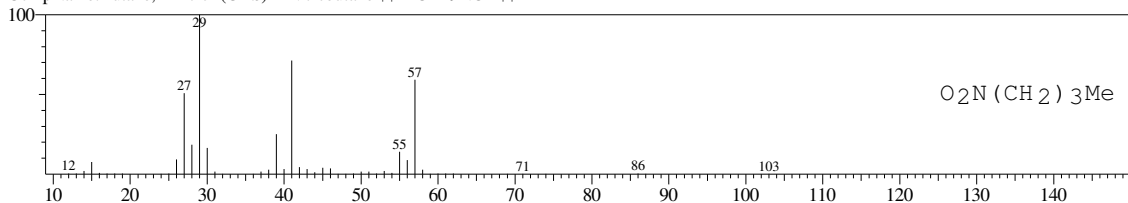

Hit#5 Entry:4657 Library:WILEY7.LIB

SI:74 Formula:C4 H9 CL CAS:507-20-0 MolWeight:92 RetIndex:0

CompName:Propane, 2-chloro-2-methyl- (CAS) tert-Butyl chloride \$\$ 2-Chloro-2-methylpropane \$\$ 2-Chloroisobutane \$\$ Trimethylchloromethane \$\$ Ter

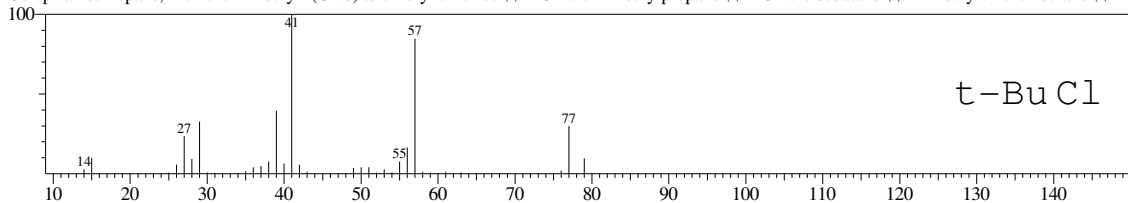

<< Target >>

Line#:38 R.Time:40.690(Scan#:3970) MassPeaks:17

RawMode:Averaged 40.680-40.700(3969-3971) BasePeak:95.05(1060)

BG Mode:Calc. from Peak Group 1 - Event 1

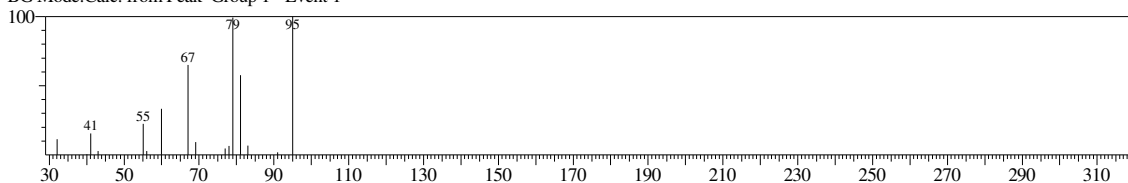

Hit#1 Entry:35779 Library:WILEY7.LIB

SI:74 Formula:C7 H13 Cl O CAS:58203-58-0 MolWeight:148 RetIndex:0

CompName:4-Methylchloride-hex-4-ene-1-ol \$\$ 4-Hexen-1-ol, 4-(chloromethyl)-, (E)- (CAS)

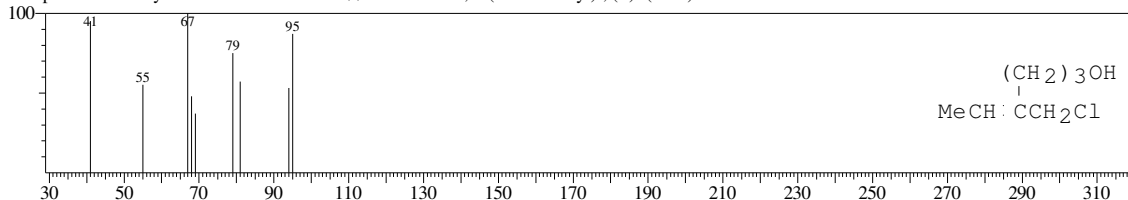

Hit#2 Entry:228710 Library:WILEY7.LIB

SI:74 Formula:C21 H34 O2 CAS:0-00-0 MolWeight:318 RetIndex:0

CompName:(9Z,15Z)-6,7,12,13-Bisepoxyhenicosa-9,15,20-triene \$\$

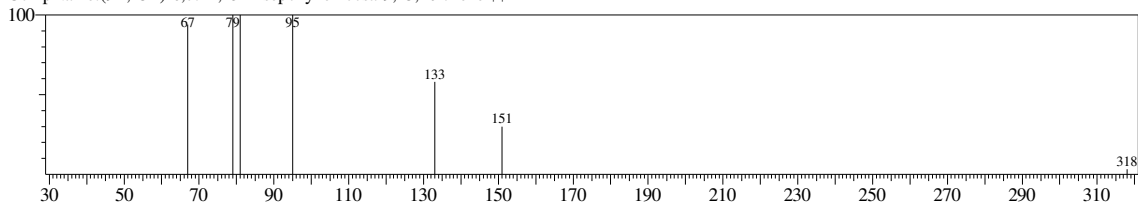

Hit#3 Entry:108461 Library:WILEY7.LIB

SI:72 Formula:C14 H26 O CAS:0-00-0 MolWeight:210 RetIndex:0

CompName:(4Z,9Z)-Tetradeca-4,9-dien-1-ol \$\$

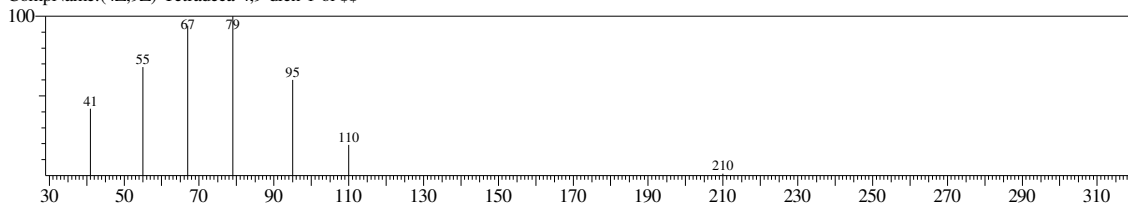

Hit#4 Entry:44045 Library:WILEY7.LIB

SI:72 Formula:C10 H18 O CAS:0-00-0 MolWeight:154 RetIndex:0

CompName:2-methyl-3-isobutenyl-4-penten-1-ol \$.alpha.-santolina alcohol \$\$

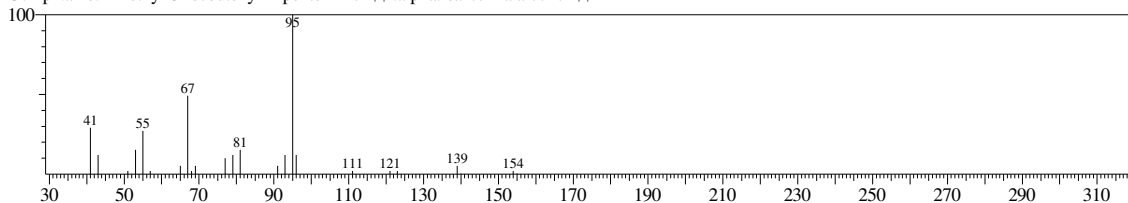

Hit#5 Entry:59113 Library:WILEY7.LIB

SI:72 Formula:C8 H11 N O3 CAS:127093-08-7 MolWeight:169 RetIndex:0

CompName:5-exo-methyl-5-endo-nitrobicyclo-[2.2.1]heptan-2-one \$\$ Bicyclo[2.2.1]heptan-2-one, 5-methyl-5-nitro-, endo- (CAS)

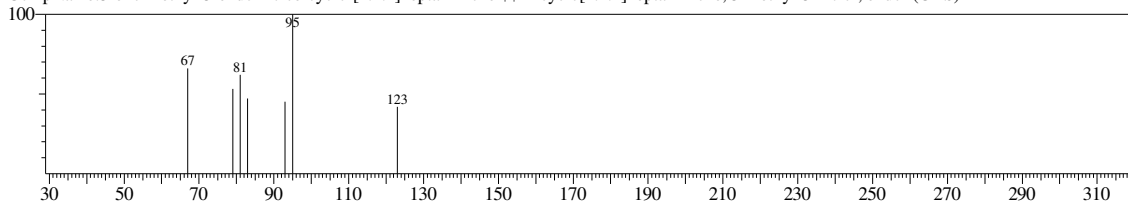



<< Target >>

Line#:39 R.Time:41.100(Scan#:4011) MassPeaks:18

RawMode:Averaged 41.090-41.110(4010-4012) BasePeak:97.05(1077)

BG Mode:Calc. from Peak Group 1 - Event 1

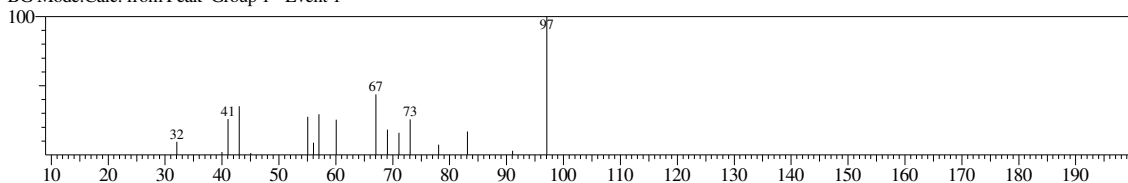

Hit#1 Entry:45985 Library:WILEY7.LIB

SI:73 Formula:C9 H16 O2 CAS:701-97-3 MolWeight:156 RetIndex:0

CompName:Cyclohexanepropionic acid (CAS) 3-Cyclohexylpropionic acid \$ \$ Cyclohexanepropionic acid \$ \$ 3-Cyclohexylpropionic acid \$ \$ 3-Cyclohexyl

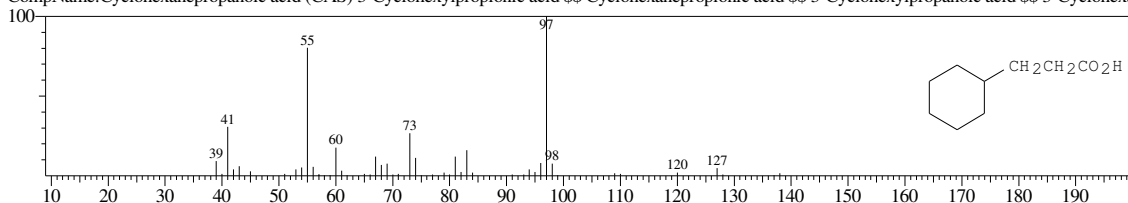

Hit#2 Entry:87969 Library:WILEY7.LIB

SI:71 Formula:C14 H26 CAS:76207-21-1 MolWeight:194 RetIndex:0

CompName:4,4,7,7-Tetramethyldeca-1,9-diene \$ \$ 1,9-Decadiene, 4,4,7,7-tetramethyl- (CAS)

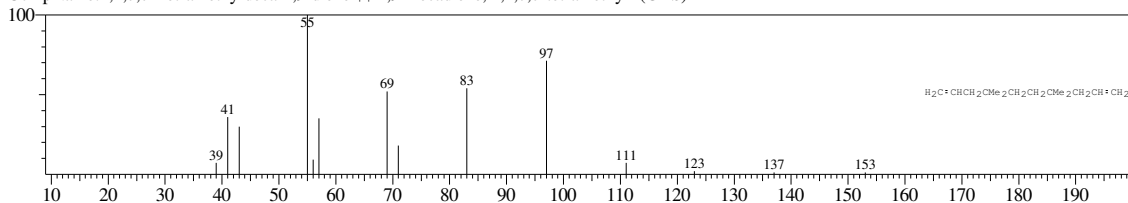

Hit#3 Entry:47425 Library:WILEY7.LIB

SI:70 Formula:C10 H22 O CAS:18479-55-5 MolWeight:158 RetIndex:0

CompName:2,6-DIMETHYL-3-OCTANOL \$ \$

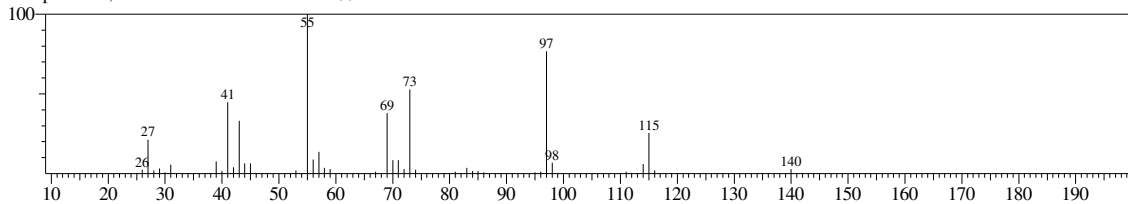

Hit#4 Entry:48024 Library:WILEY7.LIB

SI:70 Formula:C10 H22 O CAS:2051-31-2 MolWeight:158 RetIndex:0

CompName:4-Decanol (CAS) 1-Propylheptyl alcohol \$ \$ Decanol-4 \$ \$

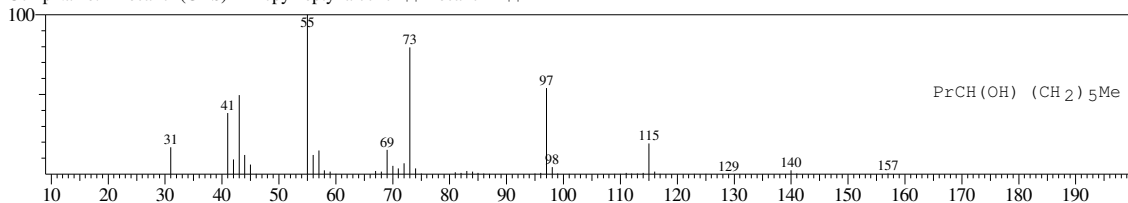

Hit#5 Entry:90095 Library:WILEY7.LIB

SI:70 Formula:C12 H20 O2 CAS:54845-28-2 MolWeight:196 RetIndex:0

CompName:2-Hexenoic acid, 2-hexenyl ester, (E,E)- (CAS) TRANS-2-HEXENYL TRANS-2-HEXENOATE \$ \$

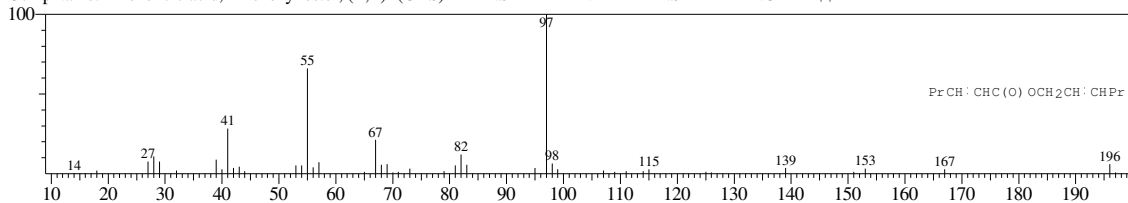

<< Target >>

Line#:40 R.Time:42.980(Scan#:4199) MassPeaks:14

RawMode:Averaged 42.970-42.990(4198-4200) BasePeak:97.05(1027)

BG Mode:Calc. from Peak Group 1 - Event 1

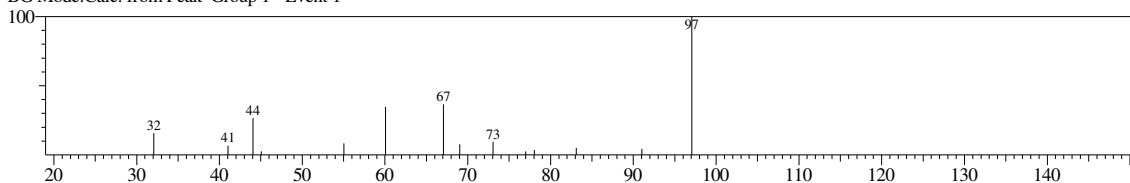

Hit#1 Entry:5701 Library:WILEY7.LIB

SI:68 Formula:C6 H10 O CAS:49785-10-6 MolWeight:98 RetIndex:0

CompName:1-vinyl-1-cyclopropyl methyl ether \$\$

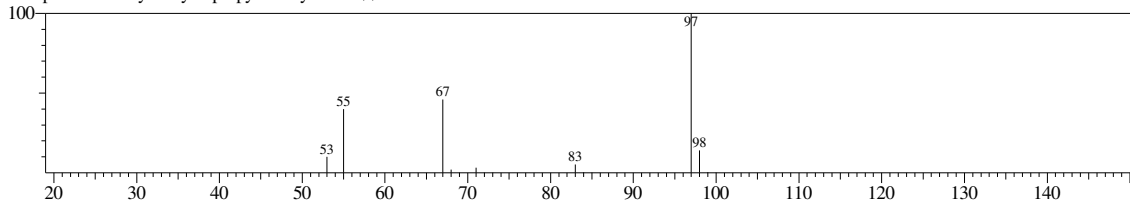

Hit#2 Entry:143466 Library:WILEY7.LIB

SI:68 Formula:C16 H30 O CAS:128821-20-5 MolWeight:238 RetIndex:0

CompName:1-(1'-hydroxyundecyl)-cyclopentene \$\$

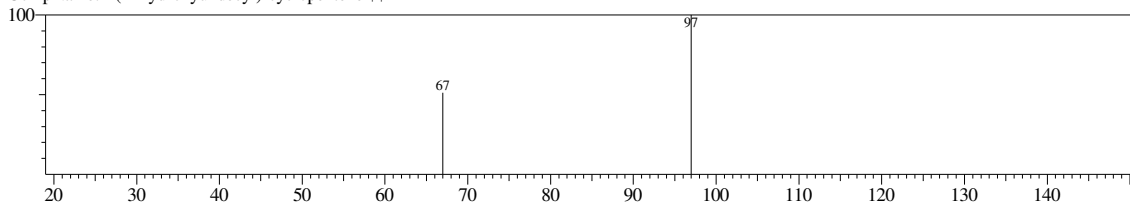

Hit#3 Entry:29858 Library:WILEY7.LIB

SI:67 Formula:C9 H16 O CAS:15158-56-2 MolWeight:140 RetIndex:0

CompName:BICYCLO(3.3.1)NONAN-1-OL \$\$ Bicyclo[3.3.1]nonan-1-ol (CAS)

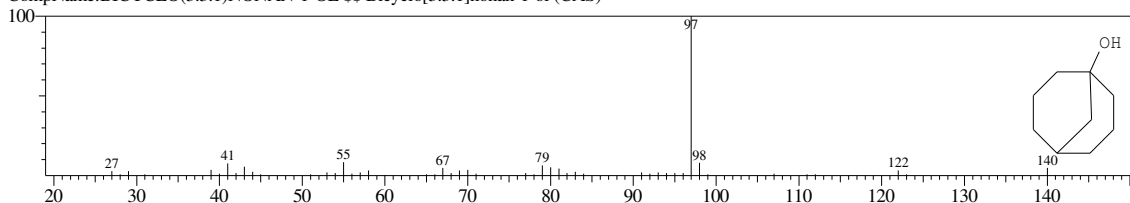

Hit#4 Entry:10762 Library:WILEY7.LIB

SI:67 Formula:C6 H12 SI CAS:0-00-0 MolWeight:112 RetIndex:0

CompName:SILANE, TRIMETHYL-2-PROPYLENE- \$\$

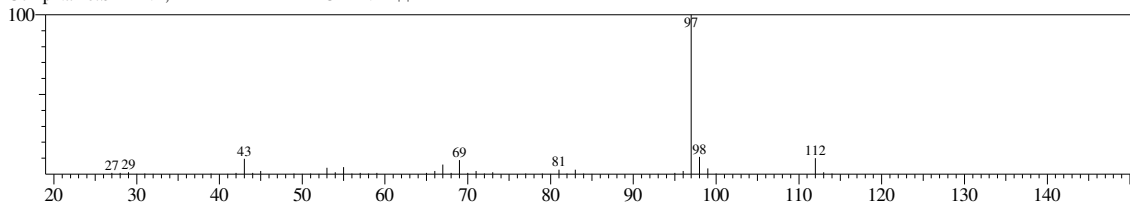

Hit#5 Entry:18187 Library:WILEY7.LIB

SI:67 Formula:C7 H10 O2 CAS:0-00-0 MolWeight:126 RetIndex:0

CompName:1-Oxa-spiro[4.2]heptane-2-carbaldehyde \$\$

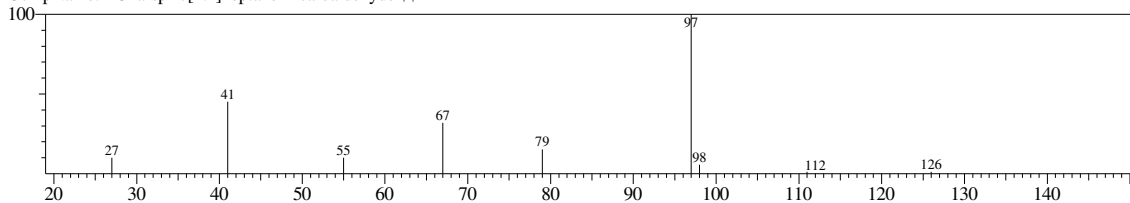

<< Target >>

Line#:41 R.Time:43.940(Scan#:4295) MassPeaks:10

RawMode:Averaged 43.930-43.950(4294-4296) BasePeak:81.05(334)

BG Mode:Calc. from Peak Group 1 - Event 1

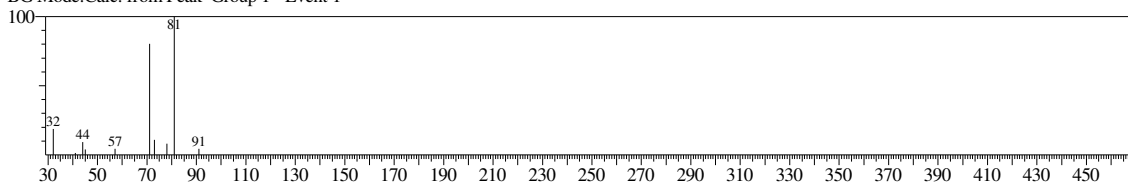

Hit#:1 Entry:222290 Library:WILEY7.LIB

SI:75 Formula:C14 H20 N2 O6 CAS:0-00-0 MolWeight:312 RetIndex:0

CompName:1-Thymine-2-deoxy-.beta.-D-ribofuranos-5-yl Butanoate \$\$

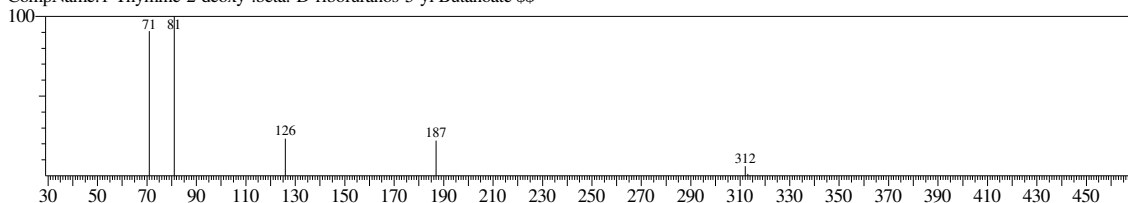

Hit#:2 Entry:62357 Library:WILEY7.LIB

SI:70 Formula:C9 H16 O3 CAS:13640-66-9 MolWeight:172 RetIndex:0

CompName:METHYL TRANS-2-METHOXYCYCLOHEXANECARBOXYLATE \$\$ Cyclohexanecarboxylic acid, 2-methoxy-, methyl ester, trans- (CAS

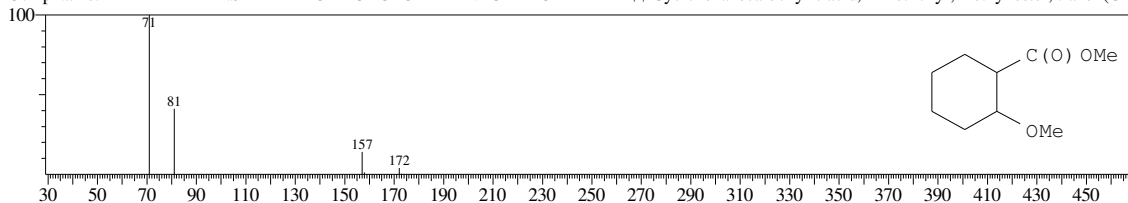

Hit#:3 Entry:120582 Library:WILEY7.LIB

SI:68 Formula:C15 H24 O CAS:0-00-0 MolWeight:220 RetIndex:0

CompName:3,7,11-trimethyldodeca-1,3,6,10-tetraen-8-ol \$\$

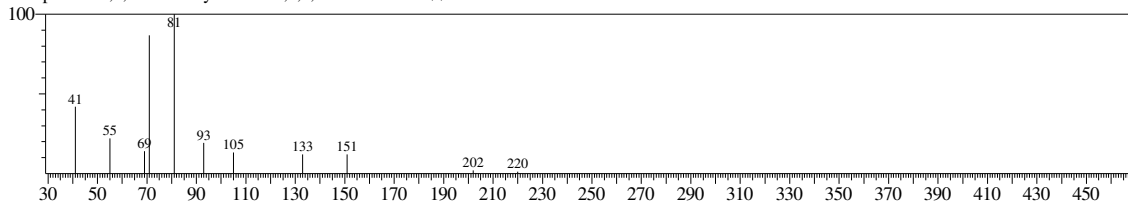

Hit#:4 Entry:308059 Library:WILEY7.LIB

SI:67 Formula:C27 H42 O4 S CAS:97634-60-1 MolWeight:462 RetIndex:0

CompName:erythro-9,14-dihydroxy-10-(1,2-dihydroxy-2-methylpropyl)-1-(phenylthio)-3,7,13-trimethyltetradeca-(E,E,E)-2,6,12-triene \$\$

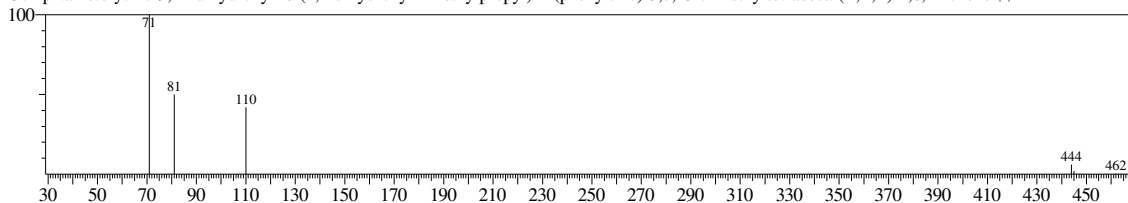

Hit#:5 Entry:84186 Library:WILEY7.LIB

SI:66 Formula:C7 H13 BR O CAS:99765-34-1 MolWeight:192 RetIndex:0

CompName:6-Bromo-1-methoxy-1-hexene \$\$

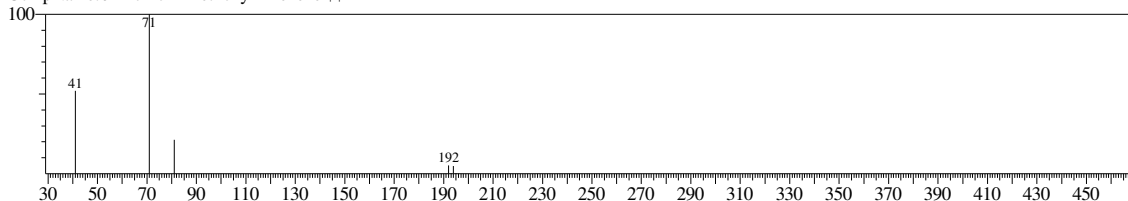

<< Target >>

Line#:42 R.Time:52.000(Scan#:5101) MassPeaks:8

RawMode:Averaged 51.990-52.010(5100-5102) BasePeak:67.05(543)

BG Mode:Calc. from Peak Group 1 - Event 1

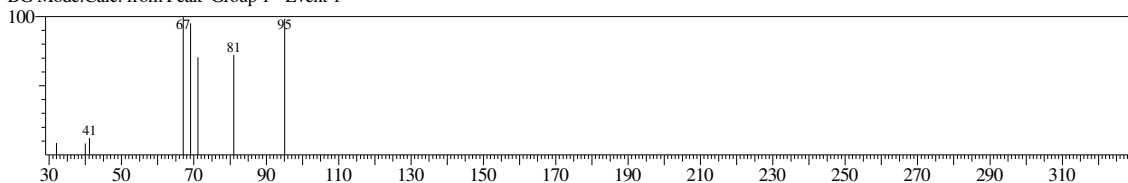

Hit#1 Entry:128508 Library:WILEY7.LIB

SI:70 Formula:C14 H26 O2 CAS:97-89-2 MolWeight:226 RetIndex:0

CompName:Citronellyl isobutyrate \$\$ ISOBUTANOIC ACID 3,7-DIMETHYL-6-OCTEN-1-OL ESTER \$\$ Propanoic acid, 2-methyl-, 3,7-dimethyl-6-oct

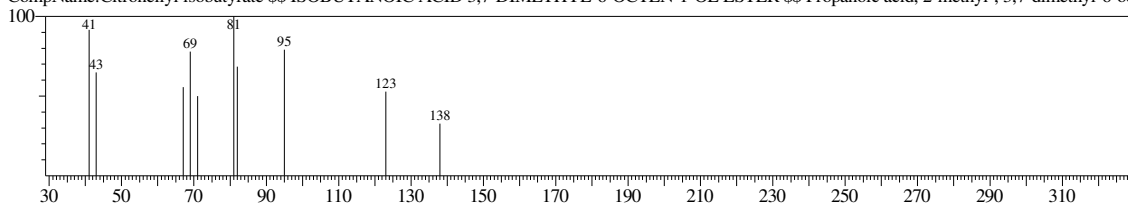

Hit#2 Entry:40376 Library:WILEY7.LIB

SI:70 Formula:C10 H16 O CAS:0-00-0 MolWeight:152 RetIndex:0

CompName:(5S)-5-Ethyl-4,4-dimethylcyclohex-2-en-1-one \$\$

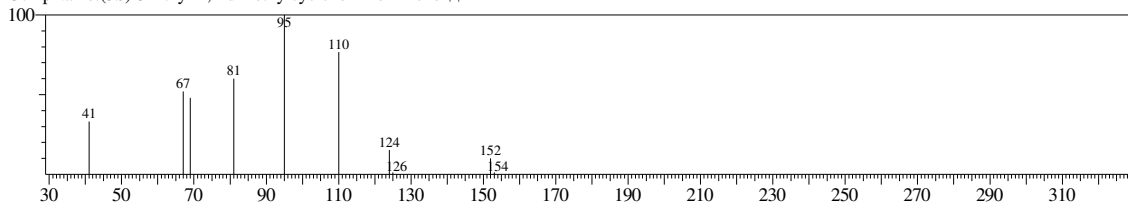

Hit#3 Entry:10043 Library:WILEY7.LIB

SI:69 Formula:C8 H14 CAS:0-00-0 MolWeight:110 RetIndex:0

CompName:2,2-Dimethylbicyclo[3.1.0]hexane \$\$

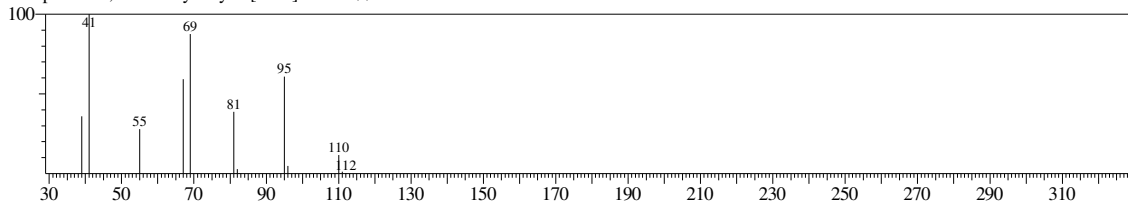

Hit#4 Entry:253639 Library:WILEY7.LIB

SI:69 Formula:C14 H24 BR2 CAS:113281-38-2 MolWeight:350 RetIndex:0

CompName:(Z,Z)-1,14-dibromo-2,12-tetradecadiene \$\$ 2,12-Tetradecadiene, 1,14-dibromo-, (Z,Z)- (CAS)

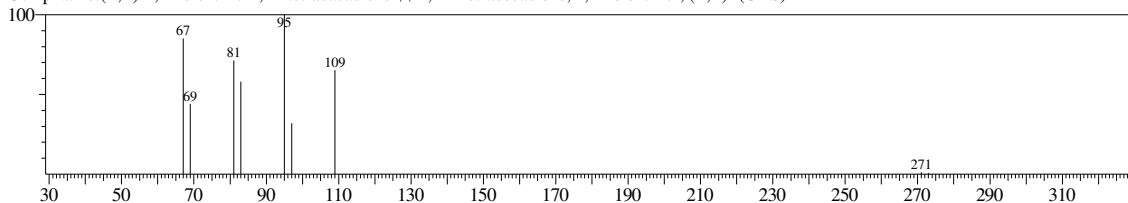

Hit#5 Entry:231359 Library:WILEY7.LIB

SI:69 Formula:C12 H20 BR2 CAS:72312-59-5 MolWeight:322 RetIndex:0

CompName:(E,E)-1,12-Dibromo-2,10-dodecadiene \$\$ 2,10-Dodecadiene, 1,12-dibromo-, (E,E)- (CAS)

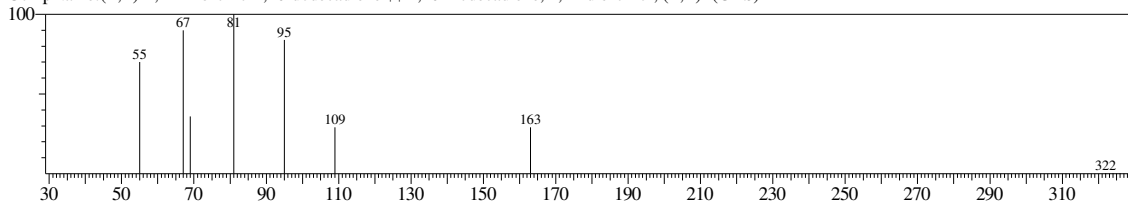

<< Target >>

Line#:43 R.Time:52.500(Scan#:5151) MassPeaks:15

RawMode:Averaged 52.490-52.510(5150-5152) BasePeak:70.10(1166)

BG Mode:Calc. from Peak Group 1 - Event 1

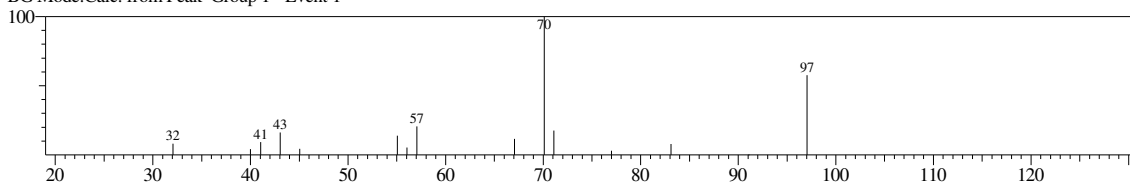

Hit#1 Entry:18979 Library:WILEY7.LIB

SI:82 Formula:C8 H14 O CAS:20534-58-1 MolWeight:126 RetIndex:0

CompName:Bicyclo[2.2.2]octan-1-ol (CAS) 1-Hydroxybicyclo[2.2.2]octane \$\$ 1-hydroxybicyclo(2.2.2)octane \$\$

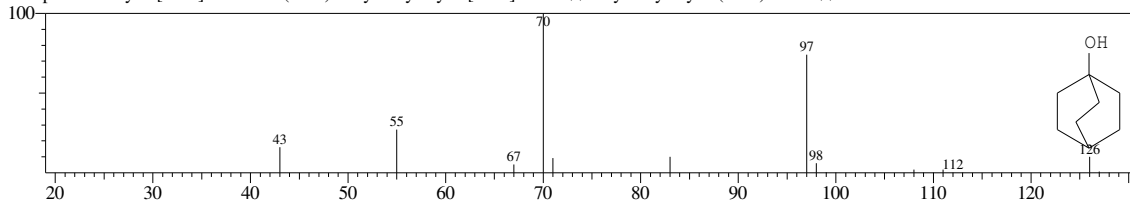

Hit#2 Entry:12996 Library:WILEY7.LIB

SI:78 Formula:C6 H13 N O CAS:135523-48-7 MolWeight:115 RetIndex:0

CompName:PYRROLIDINE, 2-(METHOXYMETHYL)- \$\$

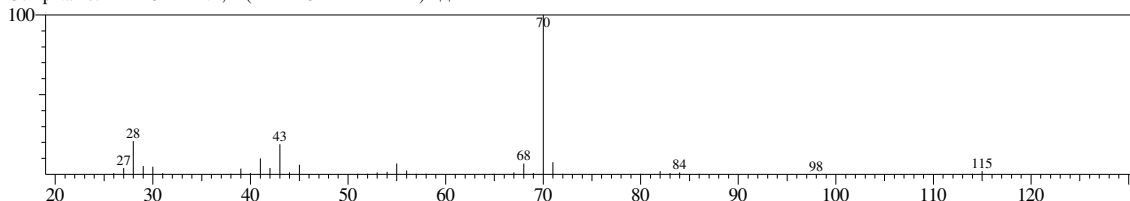

Hit#3 Entry:42893 Library:WILEY7.LIB

SI:77 Formula:C10 H18 O CAS:0-00-0 MolWeight:154 RetIndex:0

CompName:1-decen-3-one \$\$

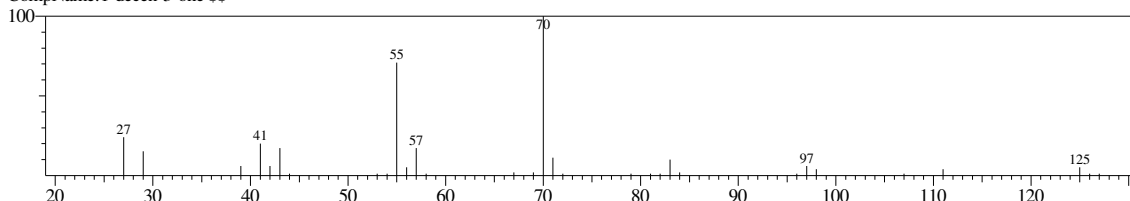

Hit#4 Entry:21491 Library:WILEY7.LIB

SI:76 Formula:C8 H18 O CAS:0-00-0 MolWeight:130 RetIndex:0

CompName:2,3,4-trimethyl-1-pentanol \$\$

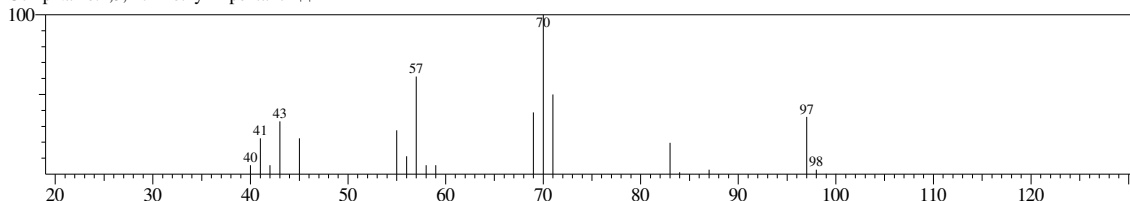

Hit#5 Entry:18980 Library:WILEY7.LIB

SI:76 Formula:C8 H14 O CAS:20534-58-1 MolWeight:126 RetIndex:0

CompName:Bicyclo[2.2.2]octan-1-ol (CAS) 1-Hydroxybicyclo[2.2.2]octane \$\$ 1-hydroxybicyclo(2.2.2)octane \$\$

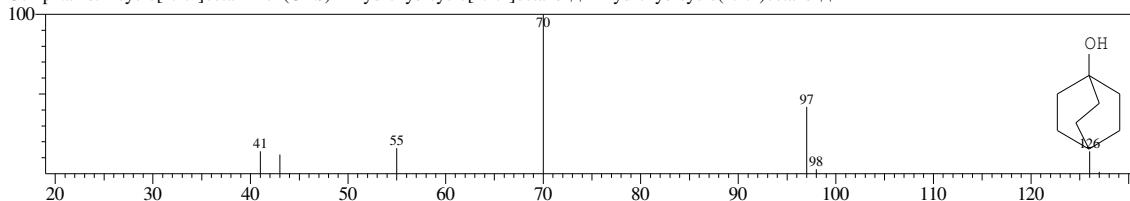

<< Target >>

Line#:44 R.Time:53.160(Scan#:5217) MassPeaks:11

RawMode:Averaged 53.150-53.170(5216-5218) BasePeak:81.05(657)

BG Mode:Calc. from Peak Group 1 - Event 1

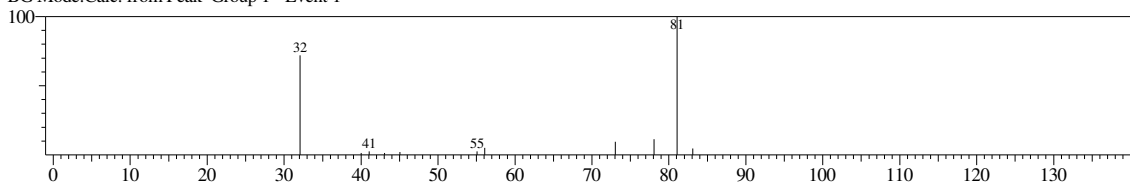

Hit#1 Entry:137820 Library:WILEY7.LIB

SI:70 Formula:C15 H22 O2 CAS:85432-07-1 MolWeight:234 RetIndex:0

CompName:2-[[5-Methyl-1-(1-methylethenyl)-5-hexenyloxy]methyl]furan (CAS)

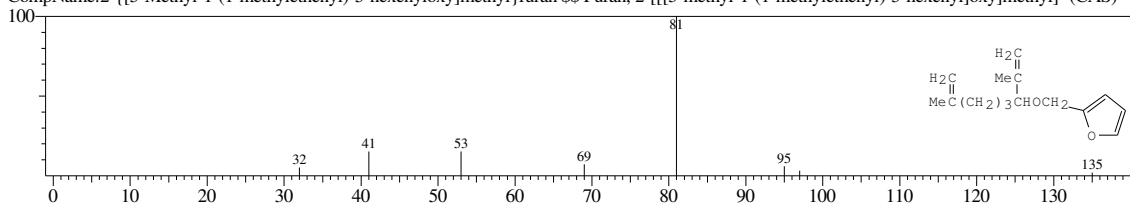

Hit#2 Entry:17596 Library:WILEY7.LIB

SI:67 Formula:C8 H12 O CAS:4466-24-4 MolWeight:124 RetIndex:0

CompName:2-Butylfuran (CAS) 2-n-Butyl furan (CAS) Furan, 2-butyl- (CAS)

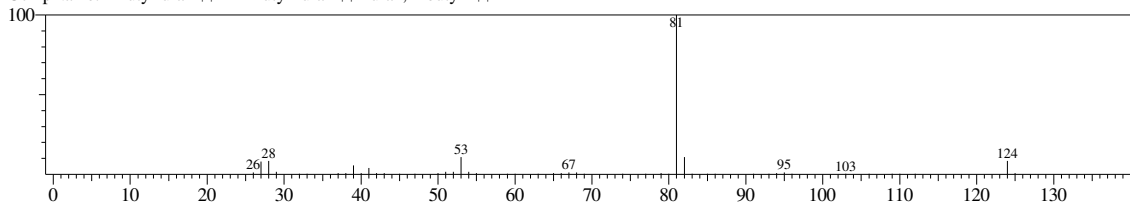

Hit#3 Entry:5237 Library:WILEY7.LIB

SI:66 Formula:C2 H6 F2 Si CAS:353-66-2 MolWeight:96 RetIndex:0

CompName:Silane, difluorodimethyl- (CAS) Dimethyldifluorosilane (CAS) Difluorodimethylsilane (CAS) (CH3)2SiF2 (CAS)

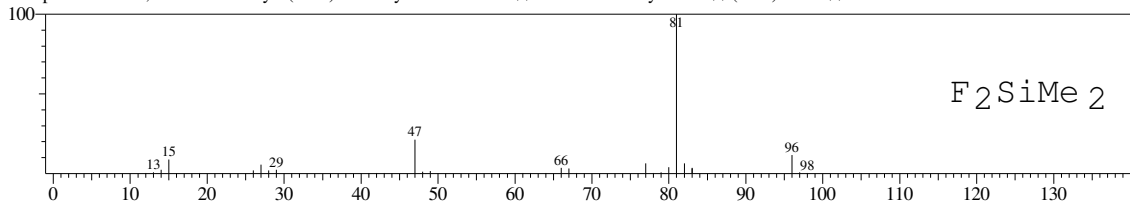

Hit#4 Entry:18240 Library:WILEY7.LIB

SI:65 Formula:C7 H10 O2 CAS:68317-77-1 MolWeight:126 RetIndex:0

CompName:2-CYCLOPENTENE-1-CARBOXYLIC ACID, 1-METHYL- (CAS)

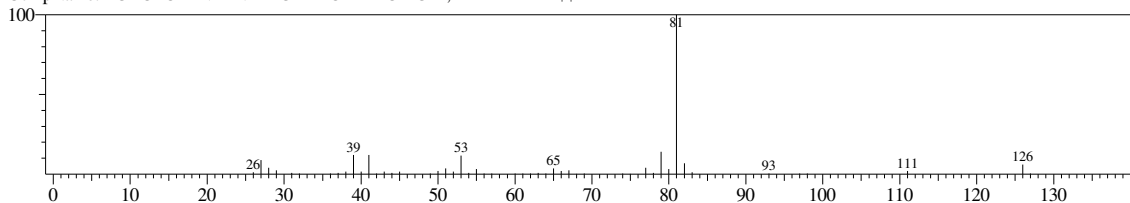

Hit#5 Entry:18817 Library:WILEY7.LIB

SI:65 Formula:C7 H10 O2 CAS:2258-56-2 MolWeight:126 RetIndex:0

CompName:2-CYCLOPENTENECARBONIC ACID, 1-METHYL- (CAS) Methyl cyclopentene-3-carboxylate (CAS) 2-Cyclopentene-1-carboxylic acid, methyl ester (CAS)

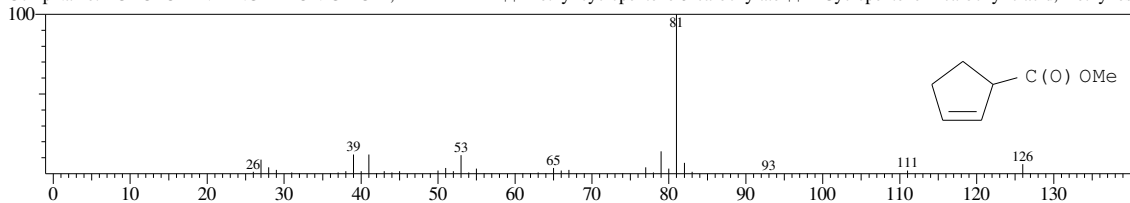

<< Target >>

Line#:45 R.Time:53.680(Scan#:5269) MassPeaks:20

RawMode:Averaged 53.670-53.690(5268-5270) BasePeak:85.10(1134)

BG Mode:Calc. from Peak Group 1 - Event 1

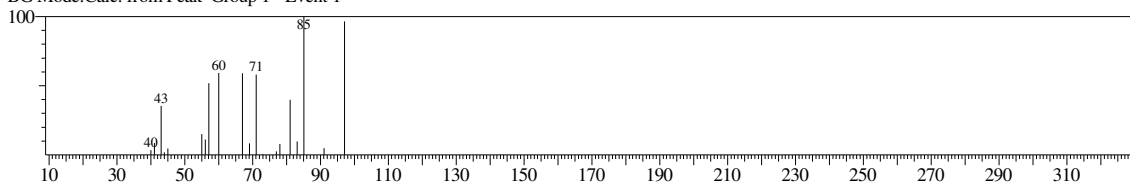

Hit#:1 Entry:13832 Library:WILEY7.LIB

SI:74 Formula:C6 H12 O2 CAS:100-72-1 MolWeight:116 RetIndex:0

CompName:2H-Pyran-2-methanol, tetrahydro- (CAS) 2-METHANOL TETRAHYDROPYRAN \$\$ Tetrahydropyran-2-carbinol \$\$ Tetrahydropyran-2-met

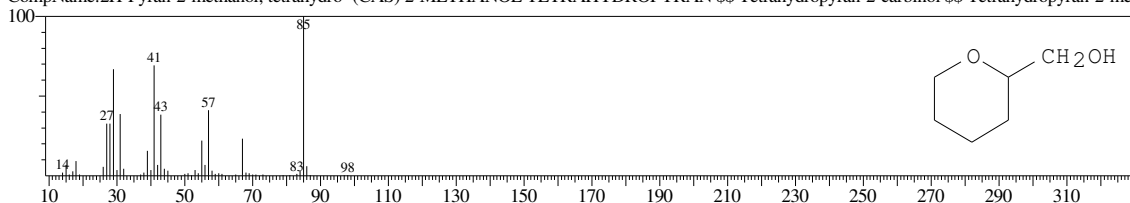

Hit#:2 Entry:19730 Library:WILEY7.LIB

SI:72 Formula:C7 H12 O2 CAS:17160-89-3 MolWeight:128 RetIndex:0

CompName:Ethanone, 1-(1-hydroxycyclopentyl)- (CAS) Ketone, 1-hydroxycyclopentyl methyl (CAS) 1-Acetylcyclopentanol \$\$ 1-Acetyl-1-cyclopentanol

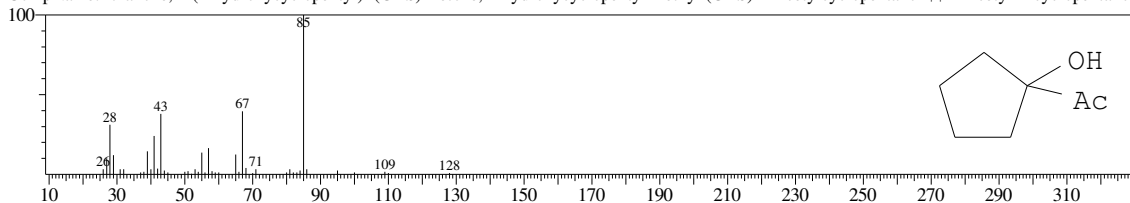

Hit#:3 Entry:20054 Library:WILEY7.LIB

SI:72 Formula:C8 H16 O CAS:0-00-0 MolWeight:128 RetIndex:0

CompName:2,2,4,4-Tetramethylcyclobutan-1-ol \$\$

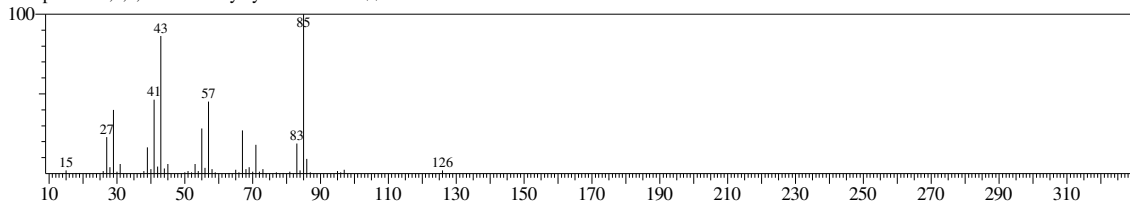

Hit#:4 Entry:245565 Library:WILEY7.LIB

SI:71 Formula:C24 H50 CAS:1928-30-9 MolWeight:338 RetIndex:0

CompName:Tricosane, 2-methyl- (CAS) 2-Methyltricosane \$\$

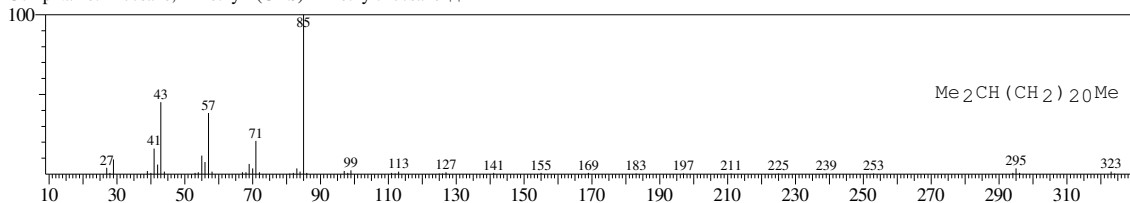

Hit#:5 Entry:23726 Library:WILEY7.LIB

SI:70 Formula:C6 H14 O3 CAS:106-69-4 MolWeight:134 RetIndex:0

CompName:1,2,6-Hexanetriol (CAS) Hexane-1,2,6-triol \$\$ 1,2,6-Trihydroxyhexane \$\$ Hexanetriol (1,2,6) \$\$

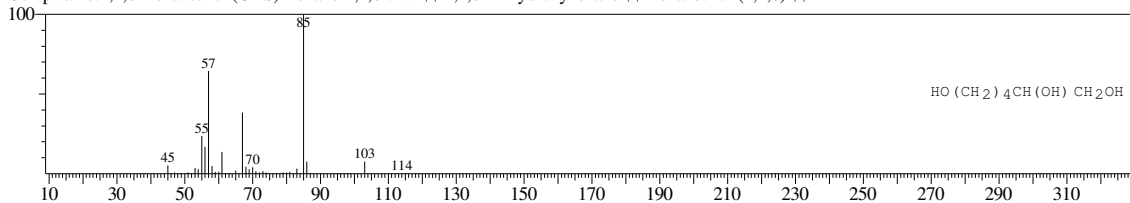

Supplement: f1 [file 3092246.f1.zip]
