# Supplementary material for: Panelist Acceptance, Proximate Characteristics of Amino Acids and Volatile Compounds, and Color Profile of Fermented Cempedak (Artocarpus champeden) and Oyster Mushroom (Pleurotus ostreatus) Seasoning
Source: Hindawi journal article supplement (doi:10.1155/2022/3092246), 2022-07-07

Sample Information

Analyzed by :Laboratorium Biosain  
Sample Type : Jamur mix mandai  
Level # : 1  
Sample Name : Jamur mix mandai  
Sample ID : Jamur mix mandai  
IS Amount : [1]=1.000  
Sample Amount : 1.000  
Dilution Factor : 1.000  
Vial # : 1  
Injection Volume : 1.000  
Data File : C:\GCMSsolution\Data\Project1\analisa volatil\jamur mix mandai 1.qgd  
Org Data File : C:\GCMSsolution\Data\Project1\analisa volatil\jamur mix mandai 1.qgd  
Tuning File : C:\GCMSsolution\System\Tune1\novita 05042021.qgt  
Modified by : Admin

Method

[Comment]

===== Analytical Line 1 =====

[GC-2010]

Column Oven Temp. :60.0 °C  
Injection Temp. :260.00 °C  
Injection Mode :Splitless  
Sampling Time :1.00 min  
Flow Control Mode :Pressure  
Pressure :38.9 kPa  
Total Flow :37.5 mL/min  
Column Flow :0.78 mL/min  
Linear Velocity :32.2 cm/sec  
Purge Flow :3.0 mL/min  
Split Ratio :-1.0  
High Pressure Injection :OFF  
Carrier Gas Saver :OFF  
Oven Temp. Program  
Rate Temperature(°C) Hold Time(min)  
- 60.0 3.00  
5.00 220.0 20.00

< Ready Check Heat Unit >

Column Oven : Yes  
SPL1 : Yes  
MS : Yes

< Ready Check Detector(FTD) >

< Ready Check Baseline Drift >

< Ready Check Injection Flow >

SPL1 Carrier : Yes  
SPL1 Purge : Yes

< Ready Check APC Flow >

< Ready Check Detector APC Flow >

External Wait :No  
Equilibrium Time :3.0 min

[GC Program]

[GCMS-QP2010 Plus]

IonSourceTemp :200.00 °C  
Interface Temp. :200.00 °C  
Solvent Cut Time :1.00 min  
Detector Gain Mode :Relative  
Detector Gain :0.00 kV  
Threshold :1000

[MS Table]

--Group 1 - Event 1--

Start Time :1.00min  
End Time :55.00min  
ACQ Mode :Scan  
Event Time :0.60sec  
Scan Speed : 555  
Start m/z :30.00  
End m/z :350.00

Sample Inlet Unit :GC

[MS Program]

Use MS Program :OFF

## Chromatogram jamur mix mandai

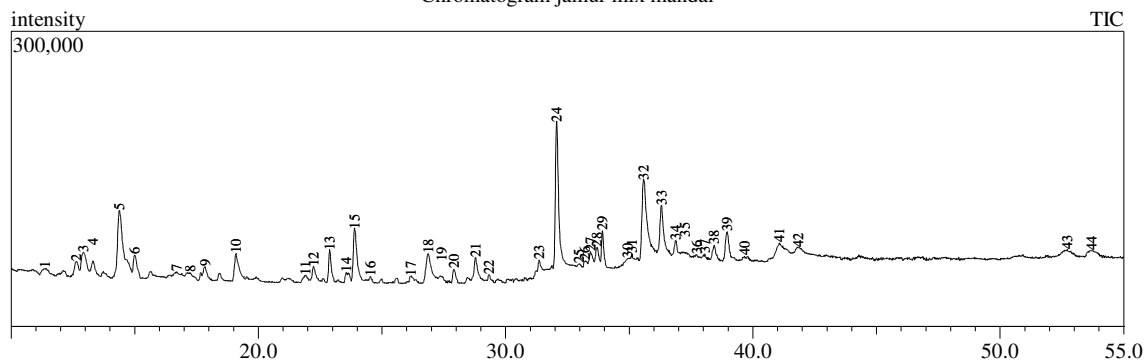

| Peak Report TIC |        |          |        |         |                                                                            |
|-----------------|--------|----------|--------|---------|----------------------------------------------------------------------------|
| Peak#           | R.Time | Area     | Area%  | Height  | Height% Name                                                               |
| 1               | 11.371 | 109797   | 0.75   | 6223    | 0.60 4-Heptanol (CAS) Dipropylcarbinol                                     |
| 2               | 12.635 | 187352   | 1.28   | 15219   | 1.48 Ethane, 1,1'-oxybis[2-ethoxy- (CAS) Bis(2-ethoxy- (CAS) Bis(2-ethoxy- |
| 3               | 12.925 | 367184   | 2.52   | 24814   | 2.41 Butanoic acid, 4-chloro-                                              |
| 4               | 13.310 | 186330   | 1.28   | 16075   | 1.56 1-Hexanol, 3-methyl- (CAS) 3-Methyl-1-hexa                            |
| 5               | 14.377 | 1205165  | 8.26   | 69082   | 6.71 6-METHYL-5-HEPTEN-2-ONE                                               |
| 6               | 15.005 | 255099   | 1.75   | 23822   | 2.31 2-Propenoic acid, 3-[(phenylmethyl)sulfonyl]-                         |
| 7               | 16.701 | 108077   | 0.74   | 6448    | 0.63 2-Furanmethanol, tetrahydro- (CAS) Tetrahyd                           |
| 8               | 17.239 | 137460   | 0.94   | 7099    | 0.69 phenyllactic acid benzyl ester                                        |
| 9               | 17.845 | 197491   | 1.35   | 13723   | 1.33 2(3H)-Furanone, dihydro-4-methyl- (CAS) L                             |
| 10              | 19.096 | 365346   | 2.50   | 27866   | 2.71 Oxetane, 2-propyl- (CAS) 2-N-PROPYL-OXI                               |
| 11              | 21.912 | 94685    | 0.65   | 7259    | 0.71 Rs-2,3-hexanediol                                                     |
| 12              | 22.237 | 191526   | 1.31   | 16458   | 1.60 CYCLOHEXYLIDENE TRIFLATE                                              |
| 13              | 22.887 | 256092   | 1.76   | 32857   | 3.19 Decane, 1-chloro- (CAS) 1-Chlorodecane                                |
| 14              | 23.562 | 123989   | 0.85   | 10467   | 1.02 1-(1,3-DIMETHYLCYCLOHEX-2-ENYL)PF                                     |
| 15              | 23.897 | 608108   | 4.17   | 55156   | 5.36 1-Undecanol (CAS) n-Undecanol                                         |
| 16              | 24.538 | 76457    | 0.52   | 6567    | 0.64 10-Oxoundecyl acetate                                                 |
| 17              | 26.168 | 113217   | 0.78   | 7378    | 0.72 3-Chloro-2-methyl-1-propanol                                          |
| 18              | 26.870 | 498467   | 3.42   | 29789   | 2.89 Hexadecanoic acid (CAS) Palmitic acid                                 |
| 19              | 27.420 | 98518    | 0.68   | 6741    | 0.66 3-hydroxy-4,4-dimethyldihydro(2-13C)furan-2                           |
| 20              | 27.914 | 123049   | 0.84   | 14169   | 1.38 Bis-[3-oxo-6'-diethylamino-spiro(phthalan-1,9                         |
| 21              | 28.788 | 323889   | 2.22   | 25945   | 2.52 1-Hexadecanol (CAS) Cetal                                             |
| 22              | 29.334 | 84549    | 0.58   | 8250    | 0.80 2-hexylallyl alcohol                                                  |
| 23              | 31.363 | 254489   | 1.74   | 18681   | 1.82 Butane, 2-chloro-2-methyl- (CAS) tert-Amyl c                          |
| 24              | 32.068 | 2044383  | 14.01  | 155187  | 15.08 Ethanol, 2-(dodecyloxy)- (CAS) DODECOXY                              |
| 25              | 32.972 | 105202   | 0.72   | 8420    | 0.82 N-Methyl-N-nitro-O-benzoylhydroxylamine                               |
| 26              | 33.220 | 98347    | 0.67   | 10285   | 1.00 1H-1,2,4-Triazole, 1-methyl- (CAS) 1-Methyl                           |
| 27              | 33.439 | 211769   | 1.45   | 18868   | 1.83 4-methylpent-3-en-2-ol                                                |
| 28              | 33.700 | 218496   | 1.50   | 21962   | 2.13 1-HYDROXY-CYCLOHEXANECARBOXY                                          |
| 29              | 33.922 | 251001   | 1.72   | 38034   | 3.70 Heptadecanoic acid, methyl ester (CAS) Meth                           |
| 30              | 34.940 | 118318   | 0.81   | 8980    | 0.87 1-Fluoro-2,2,4,4-tetramethyl-3-pentanone                              |
| 31              | 35.114 | 161334   | 1.11   | 13592   | 1.32 1,2-Hydrazinedicarboxaldehyde (CAS) 1,2-Di                            |
| 32              | 35.587 | 1494365  | 10.24  | 88476   | 8.60 9-Octadecenoic acid (Z)- (CAS) Oleic acid                             |
| 33              | 36.308 | 1020083  | 6.99   | 61019   | 5.93 Ethanol, 2-(tetradecyloxy)- (CAS) 2-Tetradecy                         |
| 34              | 36.882 | 327950   | 2.25   | 25215   | 2.45 2-Cyanato Methyl Cyclohexane                                          |
| 35              | 37.260 | 318760   | 2.18   | 12302   | 1.20 5-OXO-TETRAHYDRO-FURAN-2-CARBO                                        |
| 36              | 37.740 | 165121   | 1.13   | 9472    | 0.92 2,3,13-trioxabicyclo[8.2.1]tridecane                                  |
| 37              | 38.059 | 118069   | 0.81   | 10009   | 0.97 2-Thiazolamine (CAS) Abadol                                           |
| 38              | 38.442 | 237229   | 1.63   | 17575   | 1.71 METHYLESTER OF 3-CYCLOHEXYL-PR                                        |
| 39              | 38.961 | 419444   | 2.88   | 31443   | 3.06 CYCLOOCTENE, 3-METHYL-                                                |
| 40              | 39.660 | 114215   | 0.78   | 5740    | 0.56 Propane, 1-(ethenyloxy)-2-methyl- (CAS) Isot                          |
| 41              | 41.078 | 451148   | 3.09   | 16857   | 1.64 Hexadecanoic acid (CAS) Palmitic acid                                 |
| 42              | 41.837 | 238261   | 1.63   | 9430    | 0.92 Cyclohexaneethanol (CAS) 2-Cyclohexylethar                            |
| 43              | 52.717 | 261044   | 1.79   | 8617    | 0.84 2,3,4-trimethyl-1-pentanol                                            |
| 44              | 53.698 | 247789   | 1.70   | 7476    | 0.73 Tricosane, 2-methyl- (CAS) 2-Methyltricosan                           |
|                 |        | 14588664 | 100.00 | 1029047 | 100.00                                                                     |

Library

<< Target >>

Line#:1 R.Time:11.370(Scan#:1038) MassPeaks:8

RawMode:Averaged 11.360-11.380(1037-1039) BasePeak:55.05(1910)

BG Mode:Calc. from Peak Group 1 - Event 1

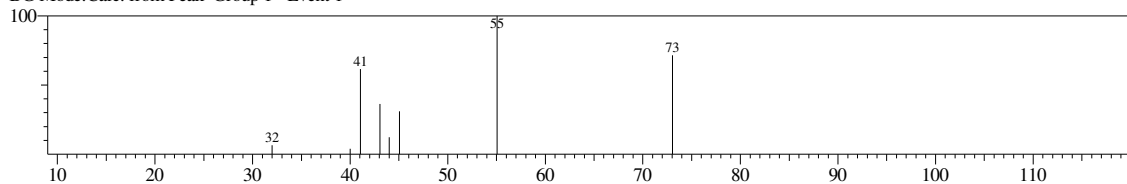

Hit#:1 Entry:13965 Library:WILEY7.LIB

SI:85 Formula:C7 H16 O CAS:589-55-9 MolWeight:116 RetIndex:0

CompName:4-Heptanol (CAS) Dipropylcarbinol  $\text{CH}_3(\text{CH}_2)_2\text{CHOH}(\text{CH}_2)_2\text{CH}_3$  di-n-Propylcarbinol

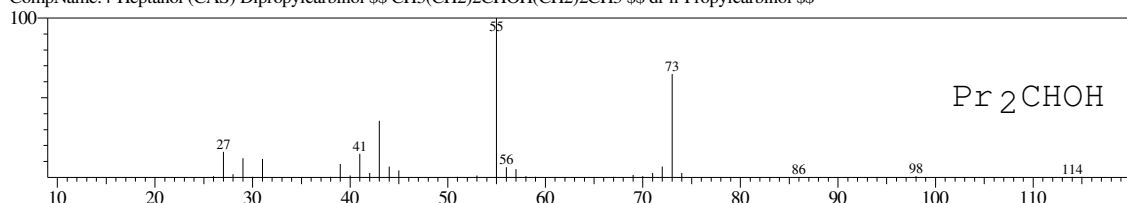

Hit#:2 Entry:13967 Library:WILEY7.LIB

SI:85 Formula:C7 H16 O CAS:589-55-9 MolWeight:116 RetIndex:0

CompName:4-Heptanol (CAS) Dipropylcarbinol  $\text{CH}_3(\text{CH}_2)_2\text{CHOH}(\text{CH}_2)_2\text{CH}_3$  di-n-Propylcarbinol

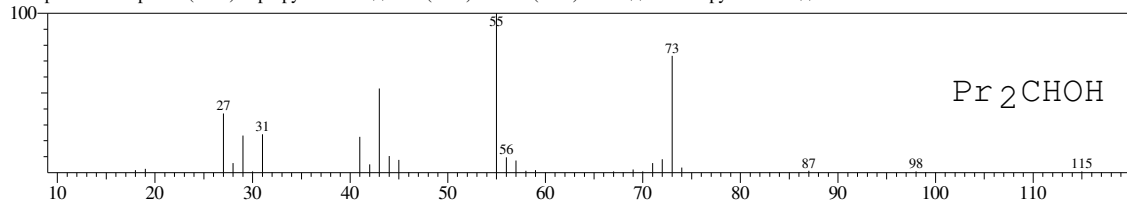

Hit#:3 Entry:13969 Library:WILEY7.LIB

SI:84 Formula:C7 H16 O CAS:589-55-9 MolWeight:116 RetIndex:0

CompName:4-Heptanol (CAS) Dipropylcarbinol  $\text{CH}_3(\text{CH}_2)_2\text{CHOH}(\text{CH}_2)_2\text{CH}_3$  di-n-Propylcarbinol

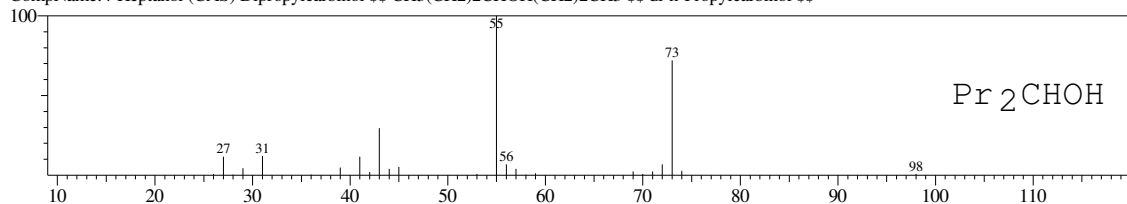

Hit#:4 Entry:13970 Library:WILEY7.LIB

SI:84 Formula:C7 H16 O CAS:589-55-9 MolWeight:116 RetIndex:0

CompName:4-Heptanol (CAS) Dipropylcarbinol  $\text{CH}_3(\text{CH}_2)_2\text{CHOH}(\text{CH}_2)_2\text{CH}_3$  di-n-Propylcarbinol

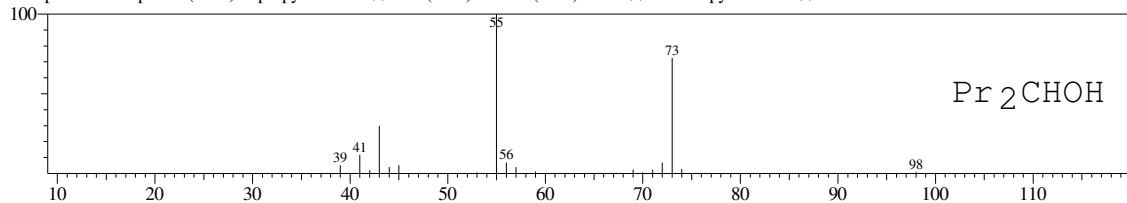

Hit#:5 Entry:13966 Library:WILEY7.LIB

SI:83 Formula:C7 H16 O CAS:589-55-9 MolWeight:116 RetIndex:0

CompName:4-Heptanol (CAS) Dipropylcarbinol  $\text{CH}_3(\text{CH}_2)_2\text{CHOH}(\text{CH}_2)_2\text{CH}_3$  di-n-Propylcarbinol

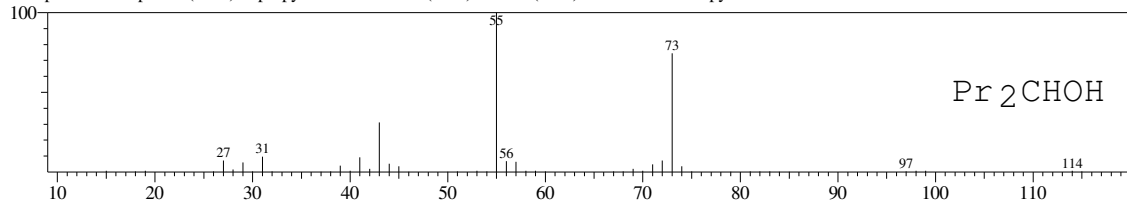

<< Target >>

Line#2 R.Time:12.630(Scan#:1164) MassPeaks:12

RawMode:Averaged 12.620-12.640(1163-1165) BasePeak:45.05(2884)

BG Mode:Calc. from Peak Group 1 - Event 1

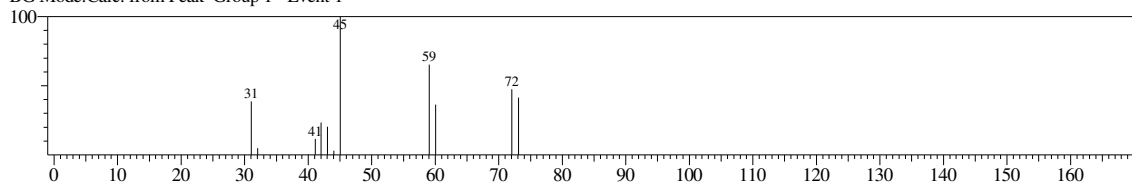

Hit#1 Entry:51451 Library:WILEY7.LIB

SI:88 Formula:C<sub>8</sub>H<sub>18</sub>O<sub>3</sub> CAS:112-36-7 MolWeight:162 RetIndex:0

CompName:Ethane, 1,1'-oxybis[2-ethoxy- (CAS) Bis(2-ethoxyethyl) ether \$ Diethyl carbitol \$ 3,6,9-Trioxaundecane \$ Diethyldiethylene glycol \$ Ethe

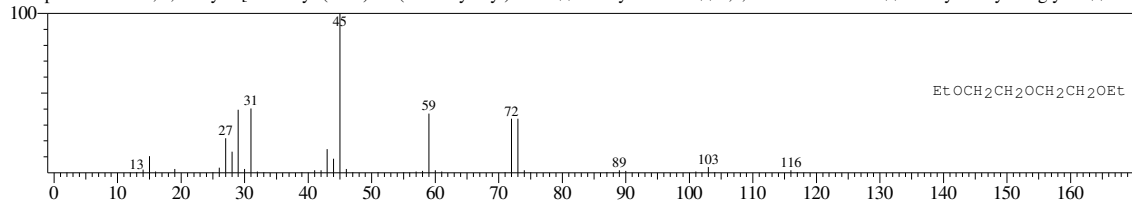

Hit#2 Entry:51453 Library:WILEY7.LIB

SI:88 Formula:C<sub>8</sub>H<sub>18</sub>O<sub>3</sub> CAS:112-36-7 MolWeight:162 RetIndex:0

CompName:Ethane, 1,1'-oxybis[2-ethoxy- (CAS) Bis(2-ethoxyethyl) ether \$ Diethyl carbitol \$ 3,6,9-Trioxaundecane \$ Diethyldiethylene glycol \$ Ethe

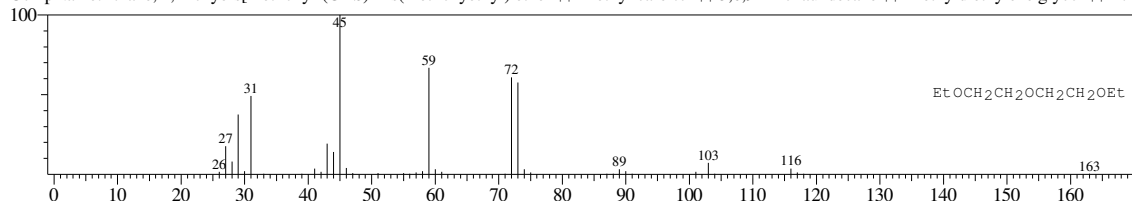

Hit#3 Entry:51452 Library:WILEY7.LIB

SI:87 Formula:C<sub>8</sub>H<sub>18</sub>O<sub>3</sub> CAS:112-36-7 MolWeight:162 RetIndex:0

CompName:Ethane, 1,1'-oxybis[2-ethoxy- (CAS) Bis(2-ethoxyethyl) ether \$ Diethyl carbitol \$ 3,6,9-Trioxaundecane \$ Diethyldiethylene glycol \$ Ethe

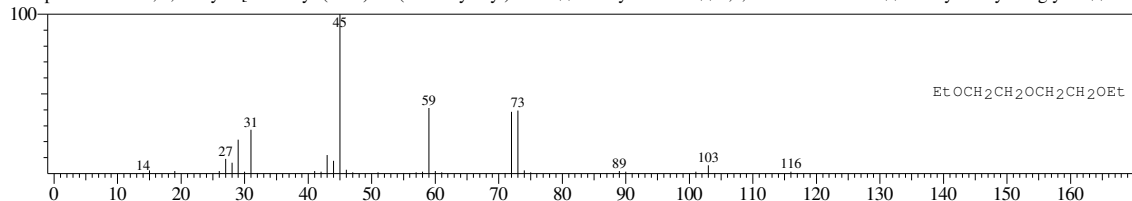

Hit#4 Entry:51454 Library:WILEY7.LIB

SI:87 Formula:C<sub>8</sub>H<sub>18</sub>O<sub>3</sub> CAS:112-36-7 MolWeight:162 RetIndex:0

CompName:Ethane, 1,1'-oxybis[2-ethoxy- (CAS) Bis(2-ethoxyethyl) ether \$ Diethyl carbitol \$ 3,6,9-Trioxaundecane \$ Diethyldiethylene glycol \$ Ethe

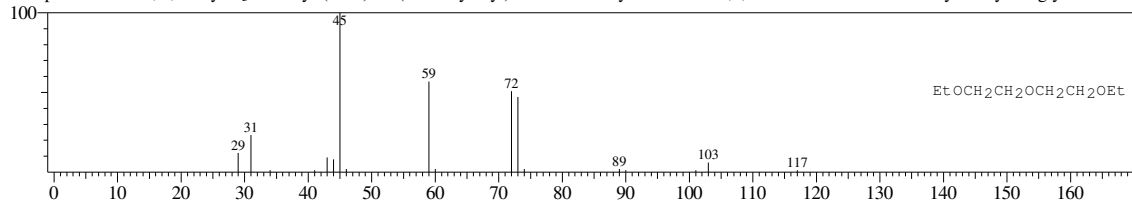

Hit#5 Entry:51450 Library:WILEY7.LIB

SI:87 Formula:C<sub>8</sub>H<sub>18</sub>O<sub>3</sub> CAS:112-36-7 MolWeight:162 RetIndex:0

CompName:Ethane, 1,1'-oxybis[2-ethoxy- (CAS) Bis(2-ethoxyethyl) ether \$ Diethyl carbitol \$ 3,6,9-Trioxaundecane \$ Diethyldiethylene glycol \$ Ethe

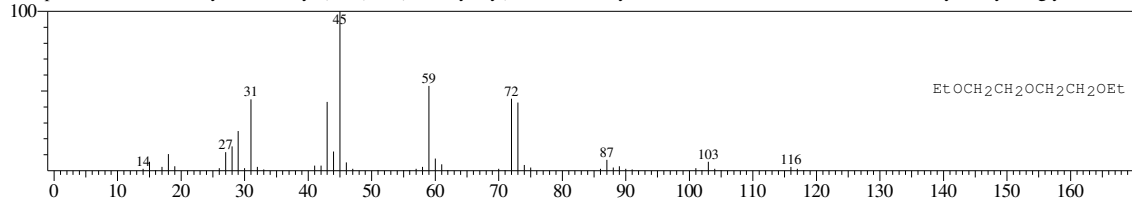

<< Target >>

Line#:3 R.Time:12.920(Scan#:1193) MassPeaks:10

RawMode:Averaged 12.910-12.930(1192-1194) BasePeak:42.05(6200)

BG Mode:Calc. from Peak Group 1 - Event 1

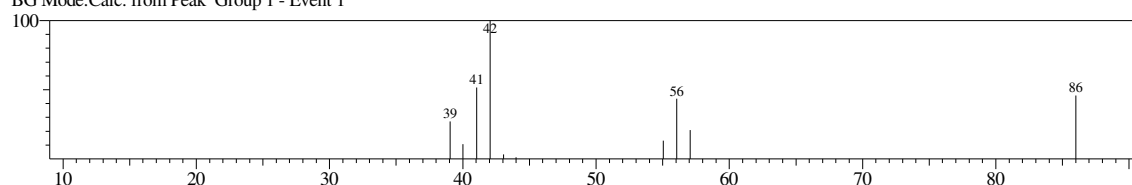

Hit#1 Entry:15907 Library:WILEY7.LIB

SI:94 Formula:C4 H7 Cl O2 CAS:627-00-9 MolWeight:122 RetIndex:0

CompName:Butanoic acid, 4-chloro- \$\$ Butyric acid, 4-chloro- \$\$ .gamma.-Chlorobutyric acid \$\$ Gammachlorobutyric acid \$\$ 4-Chlorobutanoic acid \$\$ 4

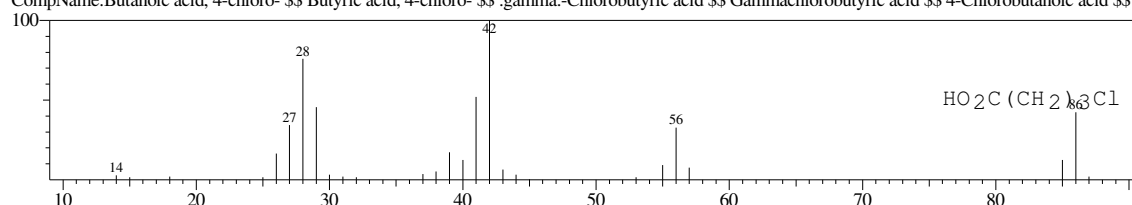

Hit#2 Entry:3295 Library:WILEY7.LIB

SI:92 Formula:C4 H6 O2 CAS:96-48-0 MolWeight:86 RetIndex:0

CompName:2(3H)-Furanone, dihydro- (CAS) Butyrolactone \$\$ 6480 \$\$ .gamma.-Butyrolactone \$\$ .gamma.-BL \$\$ 4-Butanolide \$\$ 1,4-Butanolide \$\$ 4-B

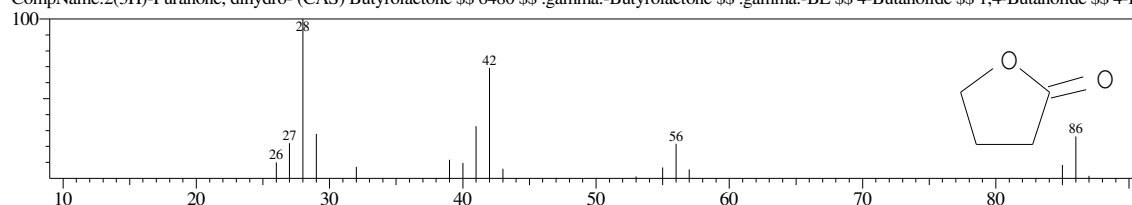

Hit#3 Entry:3284 Library:WILEY7.LIB

SI:92 Formula:C4 H6 O2 CAS:96-48-0 MolWeight:86 RetIndex:0

CompName:2(3H)-Furanone, dihydro- (CAS) Butyrolactone \$\$ 6480 \$\$ .gamma.-Butyrolactone \$\$ .gamma.-BL \$\$ 4-Butanolide \$\$ 1,4-Butanolide \$\$ 4-B

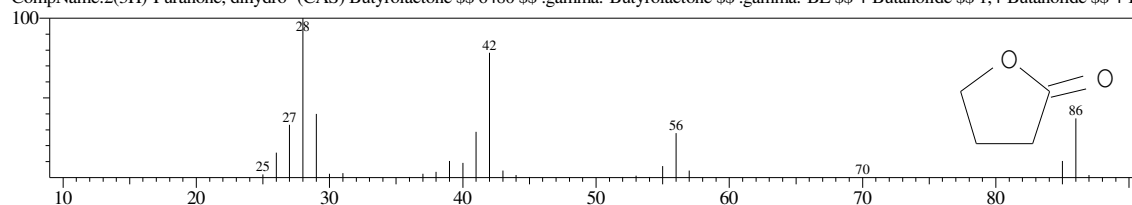

Hit#4 Entry:3286 Library:WILEY7.LIB

SI:92 Formula:C4 H6 O2 CAS:96-48-0 MolWeight:86 RetIndex:0

CompName:2(3H)-Furanone, dihydro- (CAS) Butyrolactone \$\$ 6480 \$\$ .gamma.-Butyrolactone \$\$ .gamma.-BL \$\$ 4-Butanolide \$\$ 1,4-Butanolide \$\$ 4-B

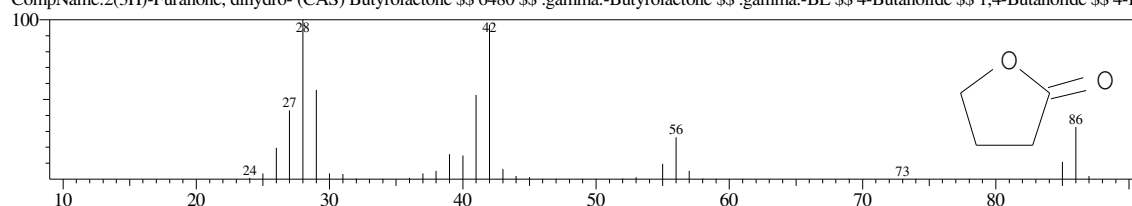

Hit#5 Entry:3290 Library:WILEY7.LIB

SI:91 Formula:C4 H6 O2 CAS:96-48-0 MolWeight:86 RetIndex:0

CompName:2(3H)-Furanone, dihydro- (CAS) Butyrolactone \$\$ 6480 \$\$ .gamma.-Butyrolactone \$\$ .gamma.-BL \$\$ 4-Butanolide \$\$ 1,4-Butanolide \$\$ 4-B

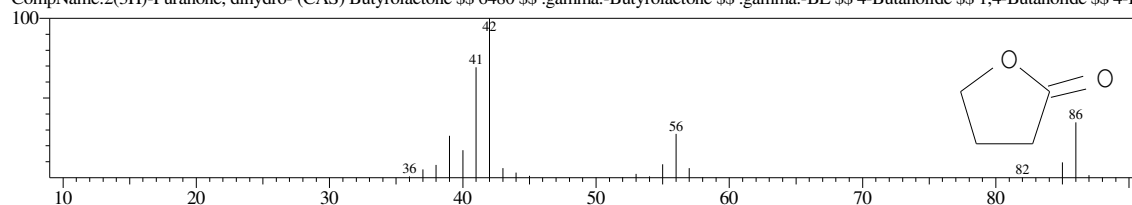

<< Target >>

Line# 4 R.Time:13.310(Scan#:1232) MassPeaks:14

RawMode:Averaged 13.300-13.320(1231-1233) BasePeak:56.05(1662)

BG Mode:Calc. from Peak Group 1 - Event 1

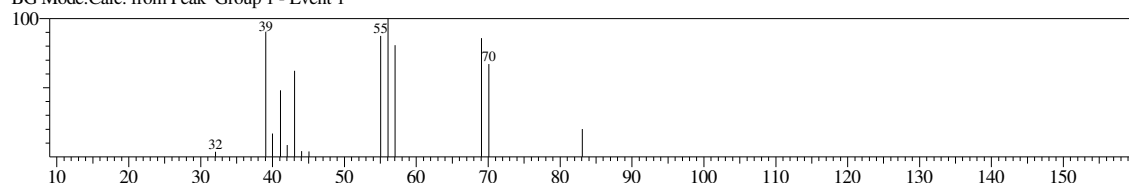

Hit# 1 Entry:13973 Library:WILEY7.LIB

SI:87 Formula:C7 H16 O CAS:13231-81-7 MolWeight:116 RetIndex:0

CompName:1-Hexanol, 3-methyl- (CAS) 3-Methyl-1-hexanol \$\$

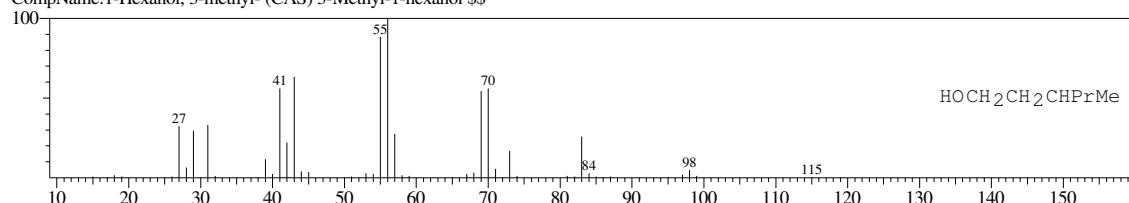

Hit# 2 Entry:10931 Library:WILEY7.LIB

SI:85 Formula:C8 H16 CAS:5026-76-6 MolWeight:112 RetIndex:0

CompName:1-Heptene, 6-methyl- (CAS) 6-Methyl-1-heptene \$\$

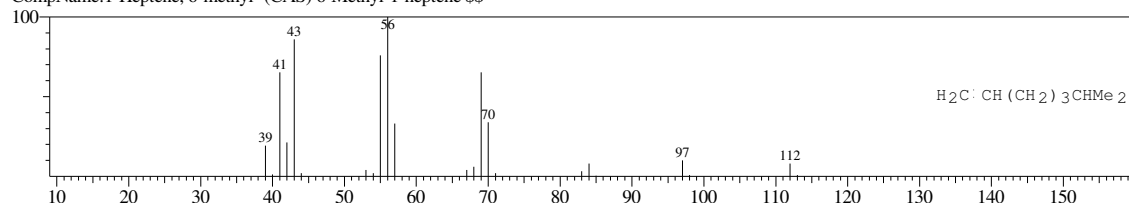

Hit# 3 Entry:6175 Library:WILEY7.LIB

SI:85 Formula:C7 H14 CAS:7385-78-6 MolWeight:98 RetIndex:0

CompName:1-Pentene, 3,4-dimethyl- (CAS) 3,4-Dimethyl-1-pentene \$\$ (CH3)2CHCH(CH3)CH=CH2 \$\$

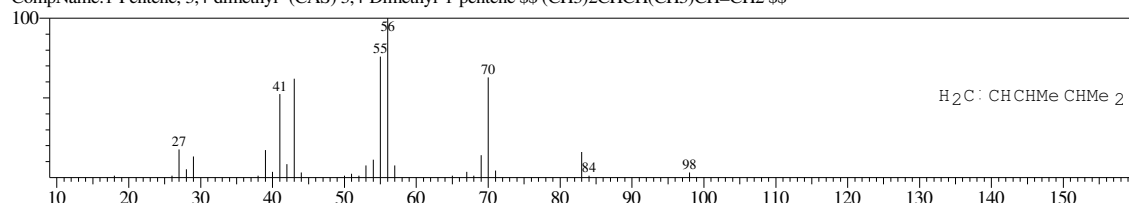

Hit# 4 Entry:24183 Library:WILEY7.LIB

SI:84 Formula:C7 H15 Cl CAS:0-00-0 MolWeight:134 RetIndex:0

CompName:4-CHLORO-HEPTANE \$\$ HEPTAN, 4-CHLORO- \$\$

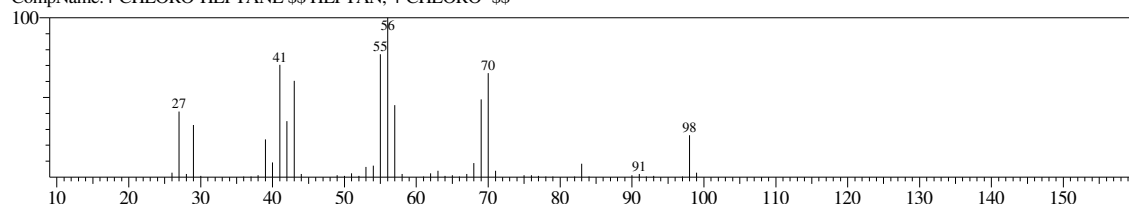

Hit# 5 Entry:43185 Library:WILEY7.LIB

SI:84 Formula:C11 H22 CAS:74630-24-3 MolWeight:154 RetIndex:0

CompName:2-Decene, 9-methyl-, (Z)- (CAS)

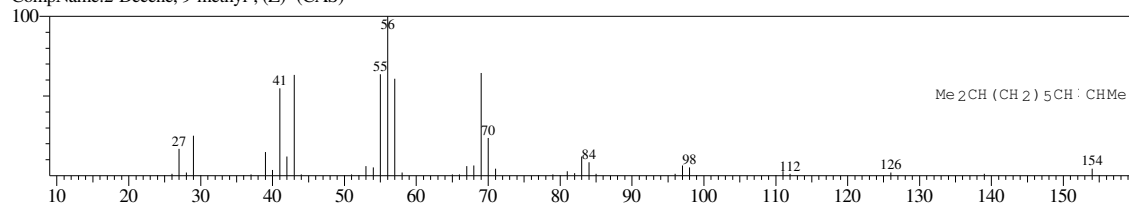

<< Target >>

Line#5 R.Time:14.380(Scan#:1339) MassPeaks:26

RawMode:Averaged 14.370-14.390(1338-1340) BasePeak:108.05(9999)

BG Mode:Calc. from Peak Group 1 - Event 1

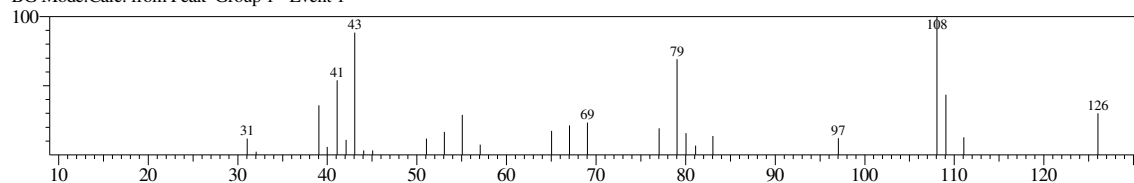

Hit#1 Entry:18402 Library:WILEY7.LIB

SI:76 Formula:C8 H14 O CAS:110-93-0 MolWeight:126 RetIndex:0

CompName:6-METHYL-5-HEPTEN-2-ONE \$\$

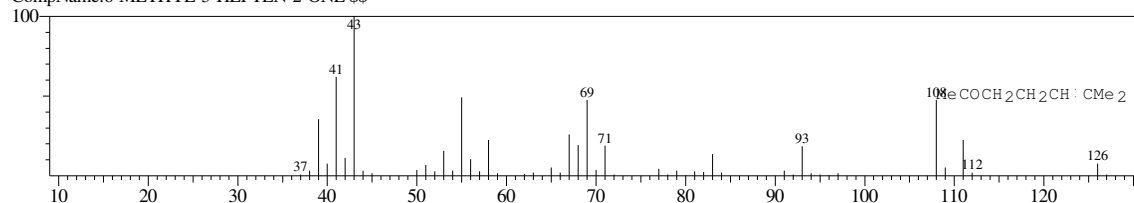

Hit#2 Entry:18912 Library:WILEY7.LIB

SI:75 Formula:C8 H14 O CAS:20685-45-4 MolWeight:126 RetIndex:0

CompName:3-Hexen-2-one, 3,4-dimethyl-, (Z)- (CAS) CIS-3,4-DIMETHYL-3-HEXEN-2-ONE \$\$

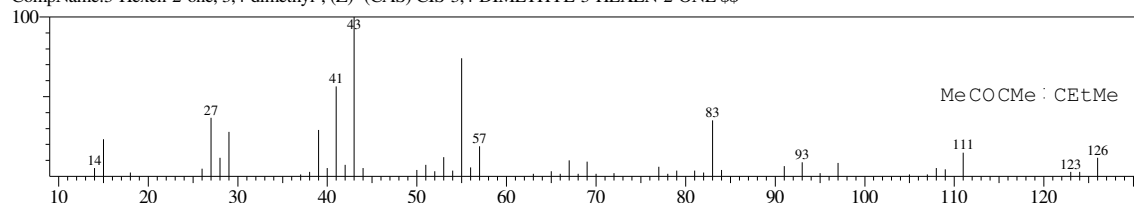

Hit#3 Entry:18888 Library:WILEY7.LIB

SI:74 Formula:C8 H14 O CAS:110-93-0 MolWeight:126 RetIndex:0

CompName:6-Methyl-5-hepten-2-one \$\$ 5-Hepten-2-one, 6-methyl- (CAS) 6-Methyl-5-heptene-2-one \$\$ 6-METHYLHEPT-5-EN-2-ONE \$\$ (6-methyl)-E

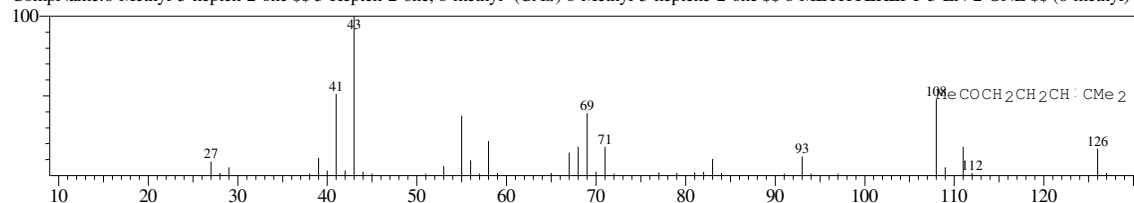

Hit#4 Entry:18893 Library:WILEY7.LIB

SI:74 Formula:C8 H14 O CAS:110-93-0 MolWeight:126 RetIndex:0

CompName:6-Methyl-5-hepten-2-one \$\$ 5-Hepten-2-one, 6-methyl- (CAS) 6-Methyl-5-heptene-2-one \$\$ 6-METHYLHEPT-5-EN-2-ONE \$\$ (6-methyl)-E

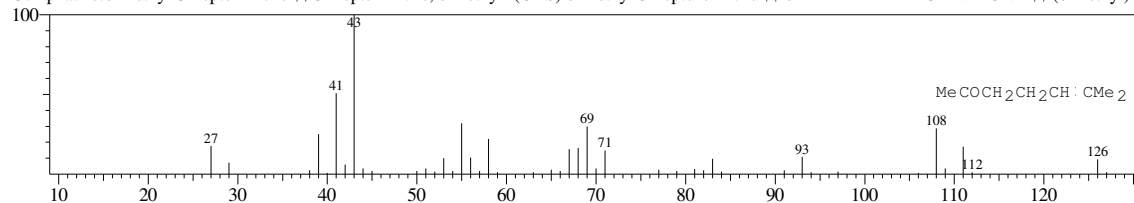

Hit#5 Entry:18889 Library:WILEY7.LIB

SI:74 Formula:C8 H14 O CAS:110-93-0 MolWeight:126 RetIndex:0

CompName:6-Methyl-5-hepten-2-one \$\$ 5-Hepten-2-one, 6-methyl- (CAS) 6-Methyl-5-heptene-2-one \$\$ 6-METHYLHEPT-5-EN-2-ONE \$\$ (6-methyl)-E

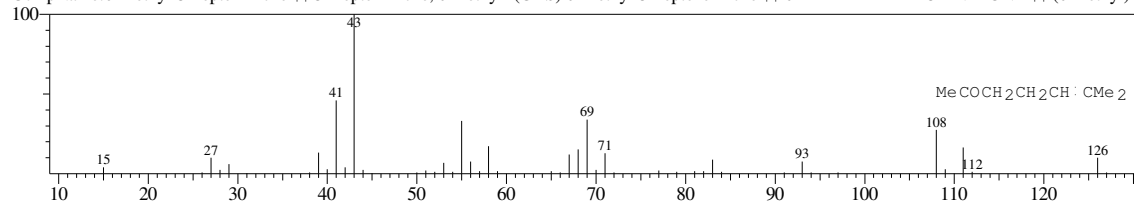

<< Target >>

Line#:6 R.Time:15.000(Scan#:1401) MassPeaks:11

RawMode:Averaged 14.990-15.010(1400-1402) BasePeak:54.05(5080)

BG Mode:Calc. from Peak Group 1 - Event 1

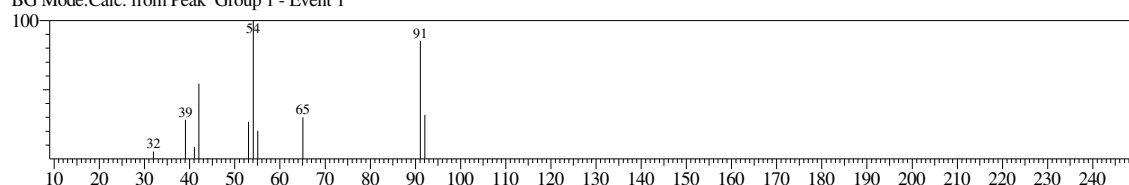

Hit#:1 Entry:144818 Library:WILEY7.LIB

SI:72 Formula:C11 H12 O4 S CAS:77611-65-5 MolWeight:240 RetIndex:0

CompName:2-Propenoic acid, 3-[(phenylmethyl)sulfonyl]-, methyl ester, (Z)- \$\$

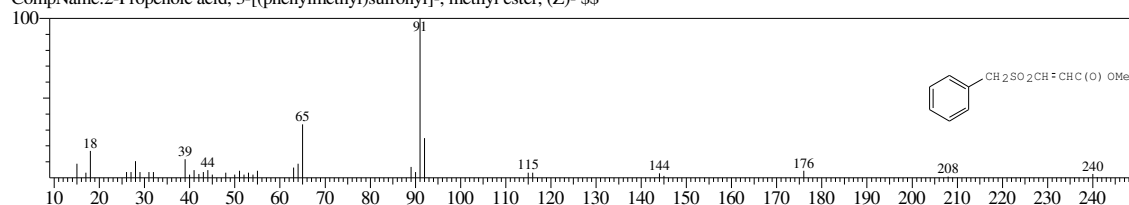

Hit#:2 Entry:5386 Library:WILEY7.LIB

SI:71 Formula:C7 H12 CAS:2384-90-9 MolWeight:96 RetIndex:0

CompName:1,2-Heptadiene (CAS) Butylallene \$\$

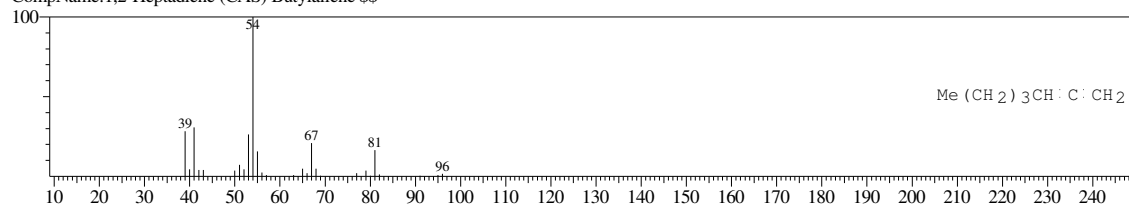

Hit#:3 Entry:4681 Library:WILEY7.LIB

SI:69 Formula:C7 H8 CAS:544-25-2 MolWeight:92 RetIndex:0

CompName:1,3,5-Cycloheptatriene (CAS) Cycloheptatriene \$\$ Tropilidin \$\$ Tropilidene \$\$ Cyclohepta-1,3,5-triene \$\$ Tropiliden \$\$

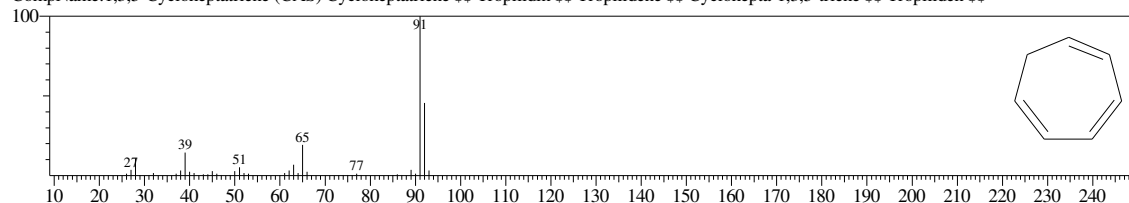

Hit#:4 Entry:4573 Library:WILEY7.LIB

SI:68 Formula:C7 H8 CAS:0-00-0 MolWeight:92 RetIndex:0

CompName:SPIRO[2.4]HEPTA-2,6-DIENE \$\$

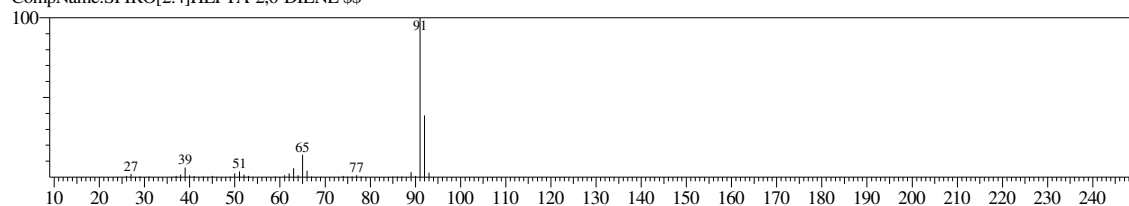

Hit#:5 Entry:4564 Library:WILEY7.LIB

SI:68 Formula:C7 H8 CAS:765-46-8 MolWeight:92 RetIndex:0

CompName:SPIRO[2.4]HEPTA-4,6-DIENE \$\$

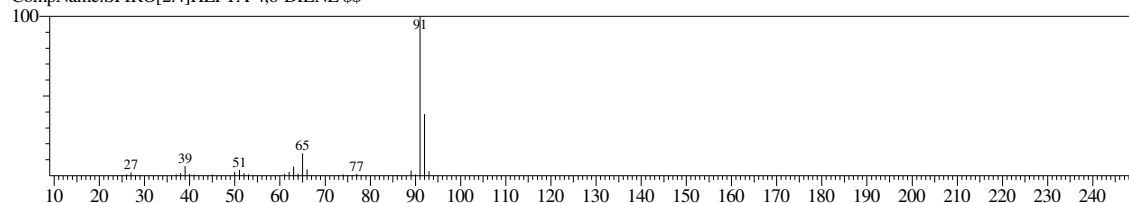



<< Target >>

Line#:7 R.Time:16.700(Scan#:1571) MassPeaks:8

RawMode:Averaged 16.690-16.710(1570-1572) BasePeak:71.05(905)

BG Mode:Calc. from Peak Group 1 - Event 1

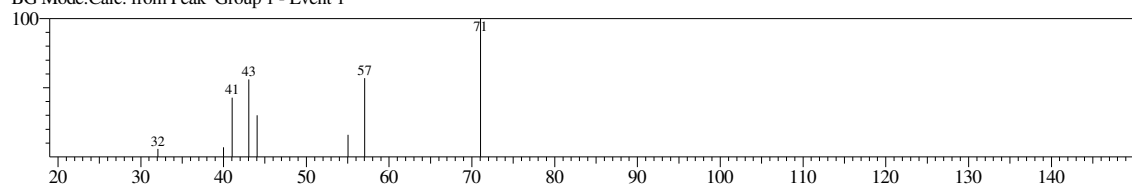

Hit#:1 Entry:7876 Library:WILEY7.LIB

SI:83 Formula:C5 H10 O2 CAS:97-99-4 MolWeight:102 RetIndex:0

CompName:2-Furanmethanol, tetrahydro- (CAS) Tetrahydrofurfuryl alcohol \$\$ ALFA-TETRAHYDROFURFURYL ALCOHOL \$\$ Qo thfa \$\$ THFA \$\$

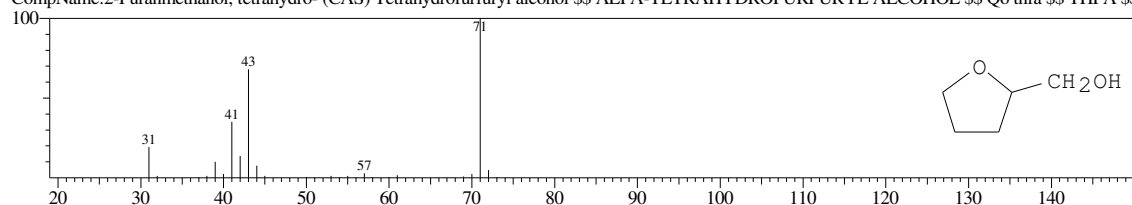

Hit#:2 Entry:97272 Library:WILEY7.LIB

SI:83 Formula:C11 H22 O3 CAS:13183-14-7 MolWeight:202 RetIndex:0

CompName:Carbonic acid, dineopentyl ester (CAS) 1-Propanol, 2,2-dimethyl-, carbonate (2:1) \$\$

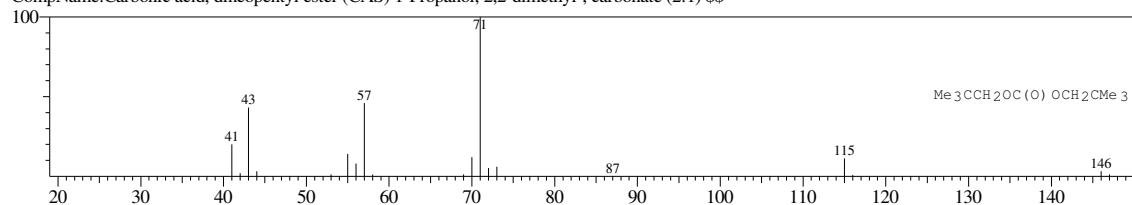

Hit#:3 Entry:31834 Library:WILEY7.LIB

SI:82 Formula:C10 H22 CAS:7154-80-5 MolWeight:142 RetIndex:0

CompName:Heptane, 3,3,5-trimethyl- (CAS) 3,3,5-Trimethylheptane \$\$

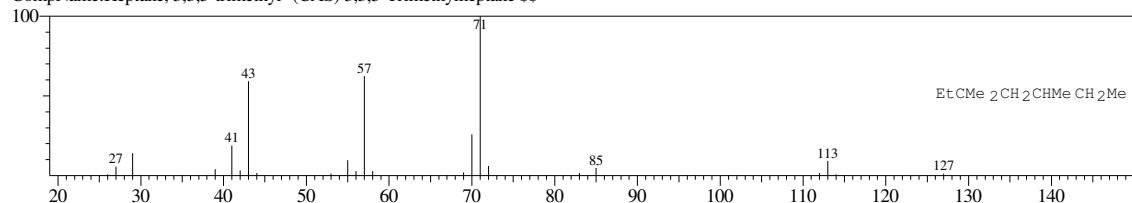

Hit#:4 Entry:20535 Library:WILEY7.LIB

SI:82 Formula:C8 H16 O CAS:57648-55-2 MolWeight:128 RetIndex:0

CompName:3-Octen-2-ol, (E)- (CAS) E-3-octen-2-ol \$\$ trans-3-Octen-2-ol \$\$

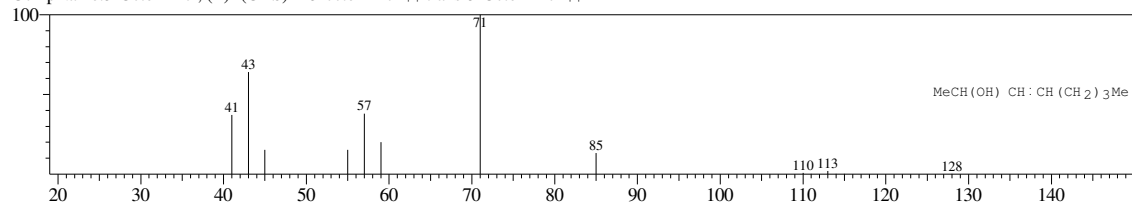

Hit#:5 Entry:31832 Library:WILEY7.LIB

SI:82 Formula:C10 H22 CAS:1189-99-7 MolWeight:142 RetIndex:0

CompName:Heptane, 2,5,5-trimethyl- (CAS) 2,5,5-Trimethylheptane \$\$

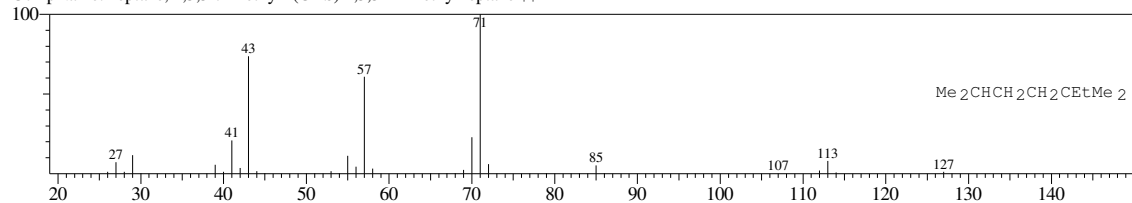

<< Target >>

Line#:8 R.Time:17.240(Scan#:1625) MassPeaks:9

RawMode:Averaged 17.230-17.250(1624-1626) BasePeak:91.05(1608)

BG Mode:Calc. from Peak Group 1 - Event 1

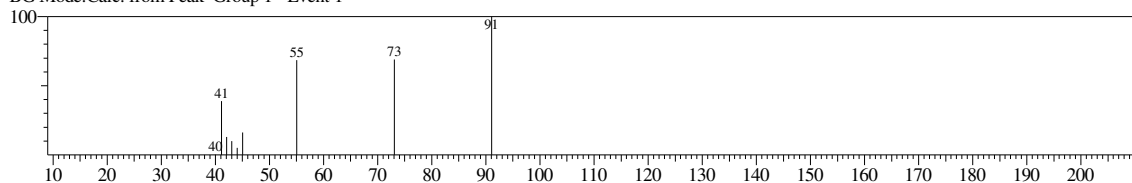

Hit#:1 Entry:105230 Library:WILEY7.LIB

SI:79 Formula:C12 H16 O3 CAS:2441-07-8 MolWeight:208 RetIndex:0

CompName:phenyllactic acid benzyl ester \$\$ Butanoic acid, 2-hydroxy-3-methyl-, phenylmethyl ester (CAS) Butyric acid, 2-hydroxy-3-methyl-, benzyl est

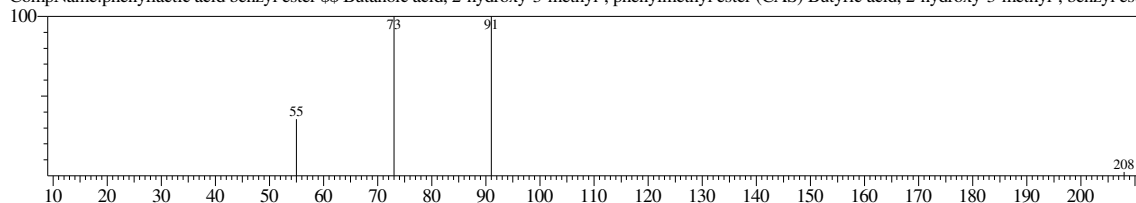

Hit#:2 Entry:93307 Library:WILEY7.LIB

SI:76 Formula:C8 H16 Cl2 O CAS:6334-96-9 MolWeight:198 RetIndex:0

CompName:Butane, 1,1'-oxybis[4-chloro- (CAS) Bis(4-chlorobutyl) ether \$\$ Di(chlorobutyl)ether \$\$ Ether, bis(4-chlorobutyl) \$\$ 4,4'-Dichlorodibutyl ethe

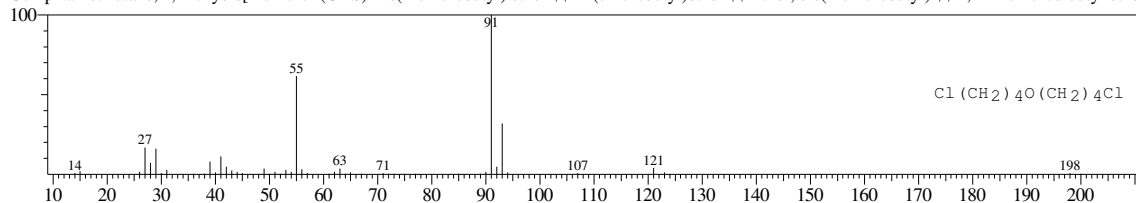

Hit#:3 Entry:10802 Library:WILEY7.LIB

SI:75 Formula:C7 H12 O CAS:22127-83-9 MolWeight:112 RetIndex:0

CompName:1-Heptyn-4-ol (CAS)

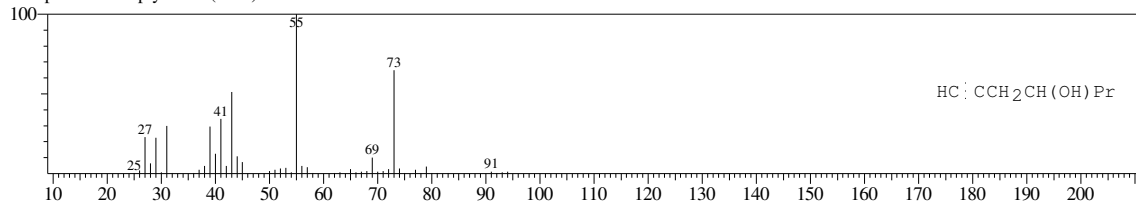

Hit#:4 Entry:93305 Library:WILEY7.LIB

SI:74 Formula:C8 H16 Cl2 O CAS:6334-96-9 MolWeight:198 RetIndex:0

CompName:Butane, 1,1'-oxybis[4-chloro- (CAS) Bis(4-chlorobutyl) ether \$\$ Di(chlorobutyl)ether \$\$ Ether, bis(4-chlorobutyl) \$\$ 4,4'-Dichlorodibutyl ethe

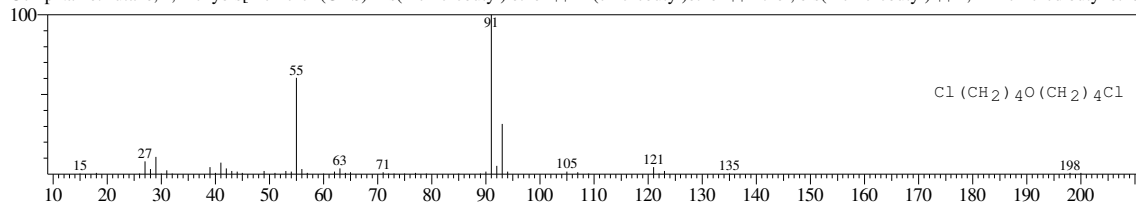

Hit#:5 Entry:71692 Library:WILEY7.LIB

SI:74 Formula:C8 H17 Cl O2 CAS:52500-29-5 MolWeight:180 RetIndex:0

CompName:BUTANE, 1-CHLORO-4-(1-ETHOXYETHOXY)- \$\$ N-(3-AMINO-2-HYDROXY-PHENYL)-ACETAMIDE \$\$

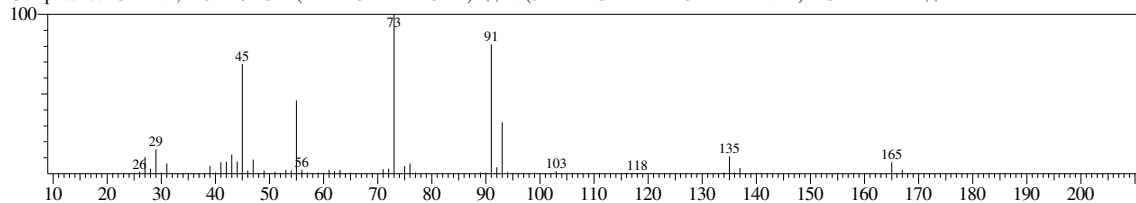

<< Target >>

Line#9 R.Time:17.850(Scan#:1686) MassPeaks:11

RawMode:Averaged 17.840-17.860(1685-1687) BasePeak:42.05(3273)

BG Mode:Calc. from Peak Group 1 - Event 1

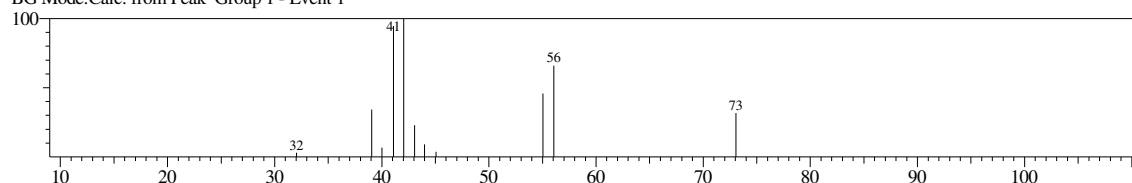

Hit#1 Entry:6797 Library:WILEY7.LIB

SI:88 Formula:C5 H8 O2 CAS:1679-49-8 MolWeight:100 RetIndex:0

CompName:2(3H)-Furanone, dihydro-4-methyl- (CAS) LACTONE 3-METHYLBUTYRIC ACID \$\$ DIHYDRO-4-METHYL-2(3H)-FURANONE \$\$ 3-Methyl-2(3H)-furanone

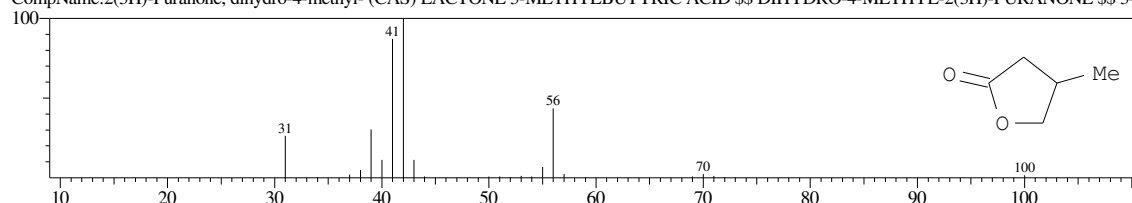

Hit#2 Entry:6818 Library:WILEY7.LIB

SI:86 Formula:C5 H8 O2 CAS:542-28-9 MolWeight:100 RetIndex:0

CompName:2H-Pyran-2-one, tetrahydro- (CAS) 5-Valerolactone \$\$ .delta.-Valerolactone \$\$ Tetrahydro-2-pyranone \$\$ .delta.-Valeryllactone \$\$ Pentanoic

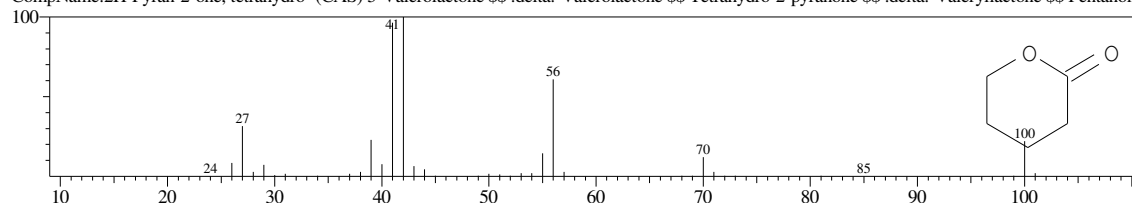

Hit#3 Entry:2876 Library:WILEY7.LIB

SI:84 Formula:C6 H12 CAS:592-41-6 MolWeight:84 RetIndex:0

CompName:1-Hexene (CAS) Hexene-1 \$\$ 1-n-Hexene \$\$ hex-1-ene \$\$ 1-C6H12 \$\$ Butylethylene \$\$ Hexene \$\$ UN 2370 \$\$ Dialene 6 \$\$

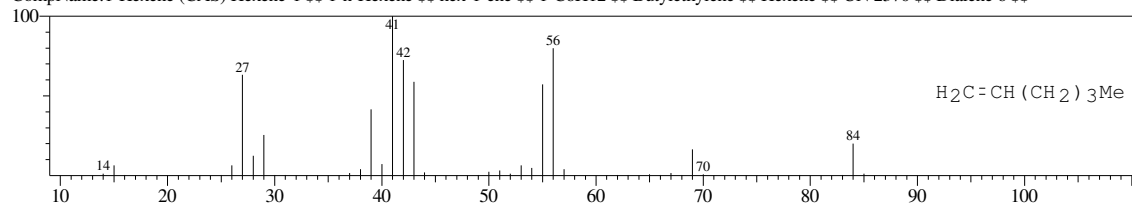

Hit#4 Entry:6795 Library:WILEY7.LIB

SI:84 Formula:C5 H8 O2 CAS:1679-47-6 MolWeight:100 RetIndex:0

CompName:2(3H)-Furanone, dihydro-3-methyl- (CAS) 3-METHYL-2-OXO-TETRAHYDROFURAN \$\$ 2-Methylbutanolide \$\$ 2-Methyl-4-butanolide \$

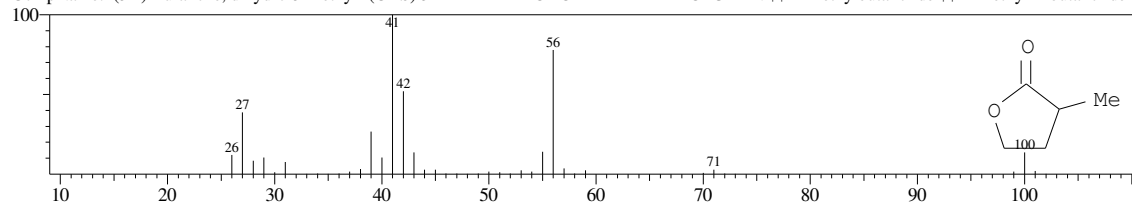

Hit#5 Entry:1759 Library:WILEY7.LIB

SI:84 Formula:C4 H10 O CAS:71-36-3 MolWeight:74 RetIndex:0

CompName:1-Butanol (CAS) n-Butanol \$\$ CCS 203 \$\$ n-Butyl alcohol \$\$ Hemostyp \$\$ n-Butan-1-ol \$\$ Butyl alcohol \$\$ Butanol \$\$ Butyl hydroxide \$

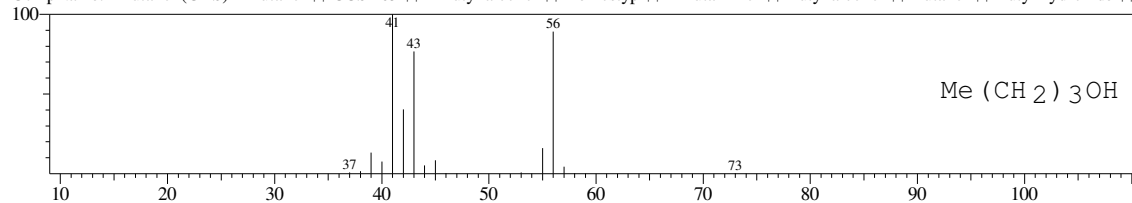

<< Target >>

Line#:10 R.Time:19.100(Scan#:1811) MassPeaks:13

RawMode:Averaged 19.090-19.110(1810-1812) BasePeak:44.05(6406)

BG Mode:Calc. from Peak Group 1 - Event 1

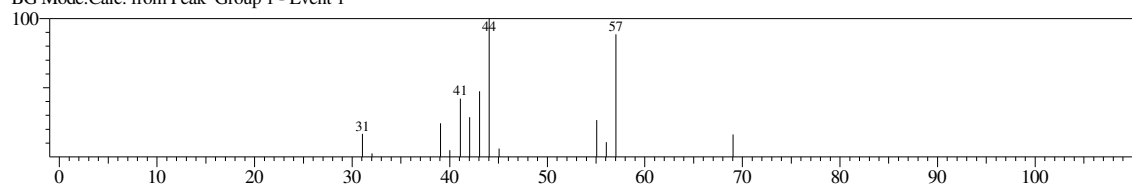

Hit#:1 Entry:6587 Library:WILEY7.LIB

SI:84 Formula:C6 H12 O CAS:4468-64-8 MolWeight:100 RetIndex:0

CompName:Oxetane, 2-propyl- (CAS) 2-N-PROPYL-OXETAN \$\$ Hexane, 1,3-epoxy- \$\$ 2-Propyloxetane \$\$

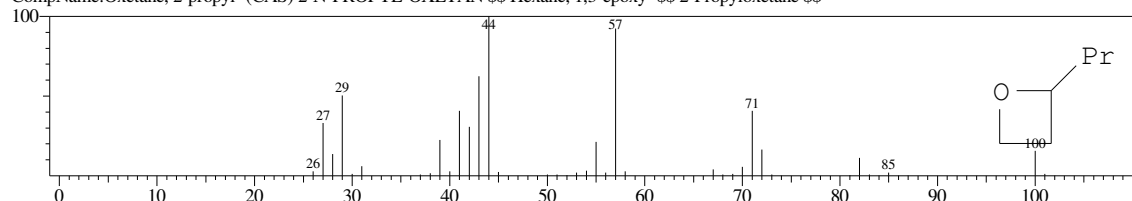

Hit#:2 Entry:1461 Library:WILEY7.LIB

SI:82 Formula:C4 H8 O CAS:2516-33-8 MolWeight:72 RetIndex:0

CompName:Cyclopropyl carbinol \$\$ Hydroxymethylcyclopropane \$\$ Cyclopropanemethanol \$\$ Cyclopropylmethanol \$\$ Cyclopropanemethyl alcohol \$\$

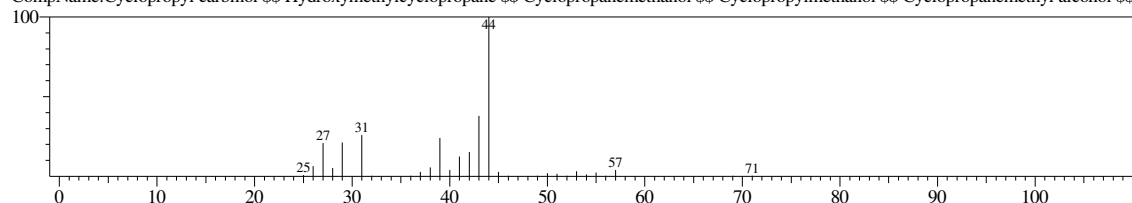

Hit#:3 Entry:3331 Library:WILEY7.LIB

SI:82 Formula:C5 H10 O CAS:110-62-3 MolWeight:86 RetIndex:0

CompName:Pentanal (CAS) n-Pentanal \$\$ n-Valeraldehyde \$\$ Valeral \$\$ Valeraldehyde \$\$ Valeric aldehyde \$\$ Valerianic aldehyde \$\$ Valerylaldehyde y

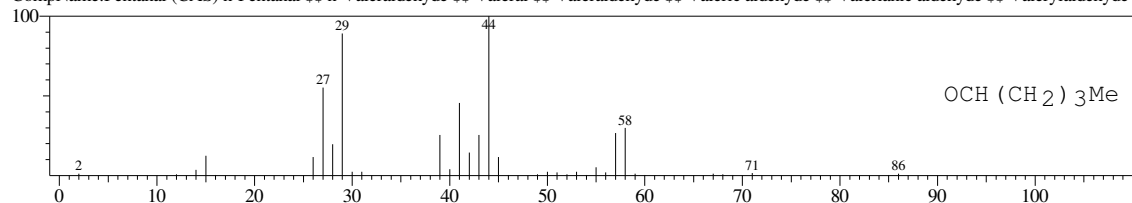

Hit#:4 Entry:1637 Library:WILEY7.LIB

SI:82 Formula:C4 H9 D O CAS:0-00-0 MolWeight:74 RetIndex:0

CompName:BUTYL ALCOHOL-2-D1 \$\$

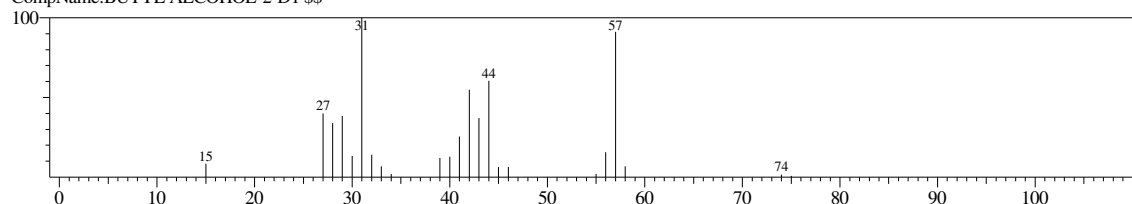

Hit#:5 Entry:3333 Library:WILEY7.LIB

SI:81 Formula:C5 H10 O CAS:110-62-3 MolWeight:86 RetIndex:0

CompName:Pentanal (CAS) n-Pentanal \$\$ n-Valeraldehyde \$\$ Valeral \$\$ Valeraldehyde \$\$ Valeric aldehyde \$\$ Valerianic aldehyde \$\$ Valerylaldehyde y

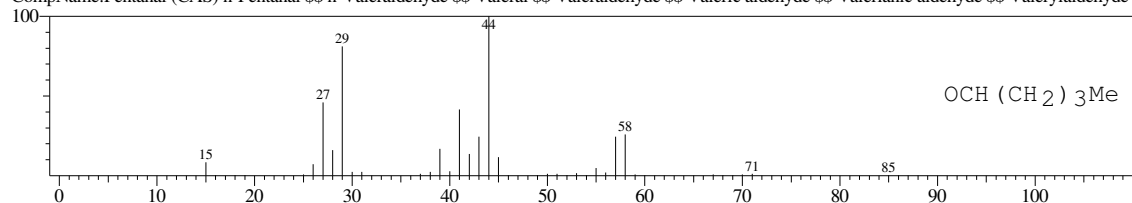

<< Target >>

Line#:11 R.Time:21.910(Scan#:2092) MassPeaks:10

RawMode:Averaged 21.900-21.920(2091-2093) BasePeak:73.05(1359)

BG Mode:Calc. from Peak Group 1 - Event 1

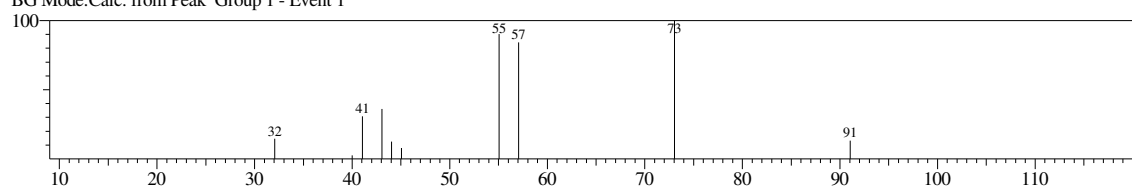

Hit#:1 Entry:14392 Library:WILEY7.LIB

SI:83 Formula:C6 H14 O2 CAS:82360-67-6 MolWeight:118 RetIndex:0

CompName:Rs-2,3-hexanediol \$\$

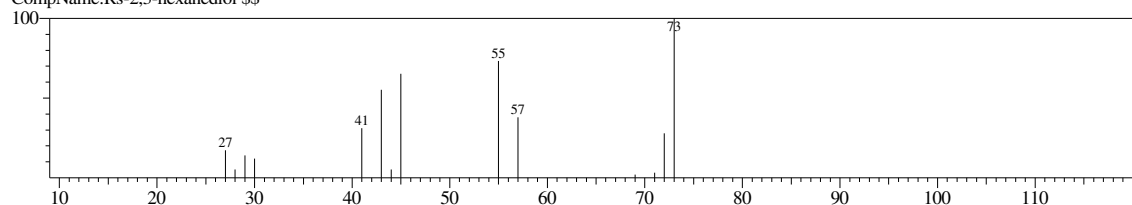

Hit#:2 Entry:13984 Library:WILEY7.LIB

SI:83 Formula:C7 H16 O CAS:617-29-8 MolWeight:116 RetIndex:0

CompName:3-Hexanol, 2-methyl- (CAS) 2-Methylhexan-3-ol \$\$ 2-Methyl-3-hexanol \$\$ 5-Methyl-4-hexanol \$\$ 1-Isopropyl-1-butanol \$\$

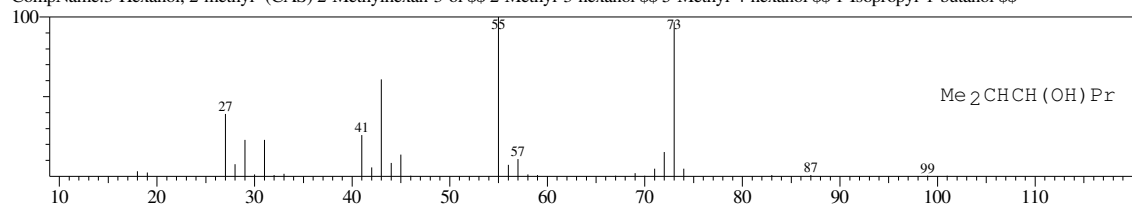

Hit#:3 Entry:13985 Library:WILEY7.LIB

SI:81 Formula:C7 H16 O CAS:617-29-8 MolWeight:116 RetIndex:0

CompName:3-Hexanol, 2-methyl- (CAS) 2-Methylhexan-3-ol \$\$ 2-Methyl-3-hexanol \$\$ 5-Methyl-4-hexanol \$\$ 1-Isopropyl-1-butanol \$\$

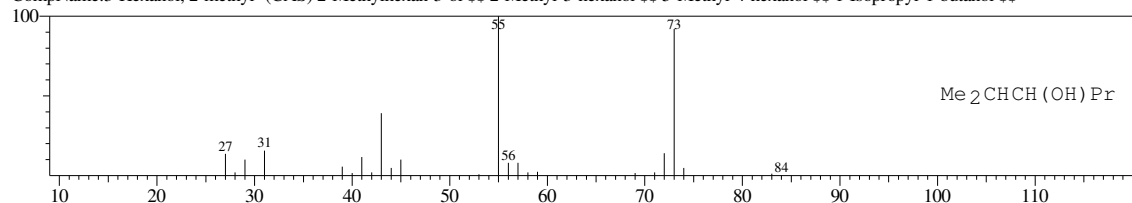

Hit#:4 Entry:13967 Library:WILEY7.LIB

SI:81 Formula:C7 H16 O CAS:589-55-9 MolWeight:116 RetIndex:0

CompName:4-Heptanol (CAS) Dipropylcarbinol \$\$  $\text{CH}_3(\text{CH}_2)_2\text{CHOH}(\text{CH}_2)_2\text{CH}_3$  \$\$ di-n-Propylcarbinol \$\$

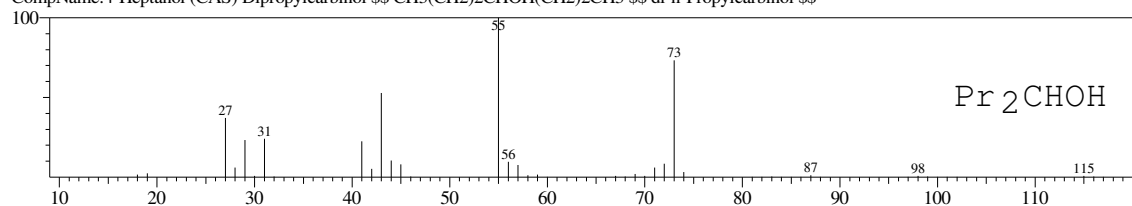

Hit#:5 Entry:14394 Library:WILEY7.LIB

SI:80 Formula:C6 H14 O2 CAS:22520-19-0 MolWeight:118 RetIndex:0

CompName:(Ss)- or (rr)-2,3-hexanediol \$\$

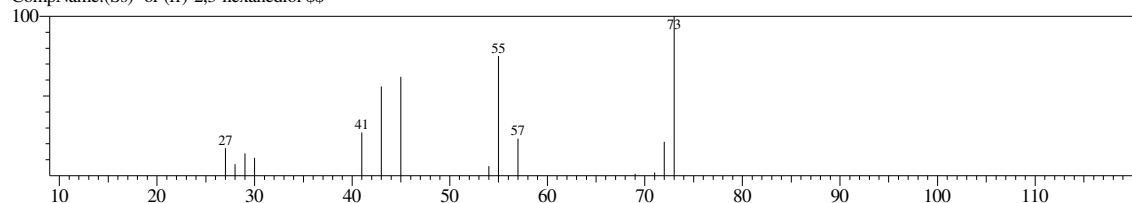

<< Target >>

Line#:12 R.Time:22.240(Scan#:2125) MassPeaks:14

RawMode:Averaged 22.230-22.250(2124-2126) BasePeak:69.05(1898)

BG Mode:Calc. from Peak Group 1 - Event 1

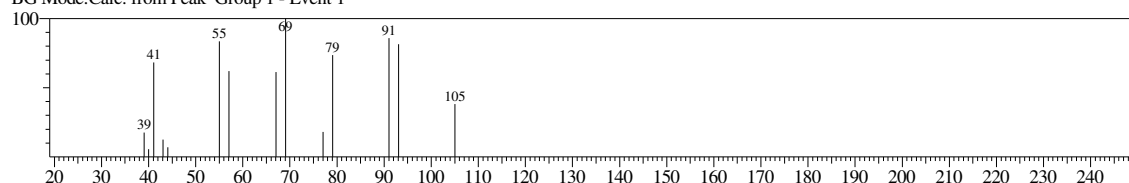

Hit#:1 Entry:149192 Library:WILEY7.LIB

SI:74 Formula:C8 H11 F3 O3 S CAS:53282-32-9 MolWeight:244 RetIndex:0

CompName:CYCLOHEXYLIDENE TRIFLATE \$\$ Methanesulfonic acid, trifluoro-, cyclohexyidenemethyl ester (CAS) Cyclohexyidenemethyl triflate \$

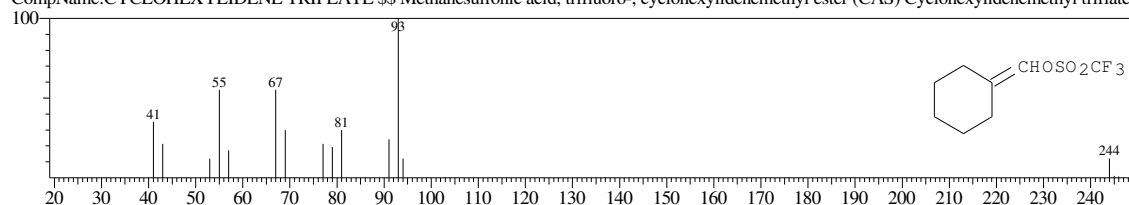

Hit#:2 Entry:9602 Library:WILEY7.LIB

SI:74 Formula:C8 H12 CAS:22842-10-0 MolWeight:108 RetIndex:0

CompName:5-Hepten-1-yne, 6-methyl- (CAS) 2-Methyl-2-hepten-6-yne \$\$

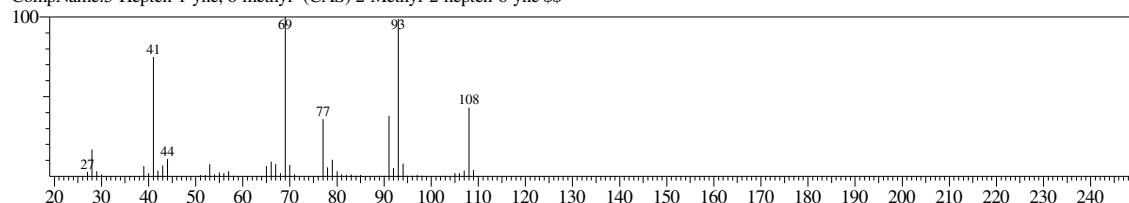

Hit#:3 Entry:26198 Library:WILEY7.LIB

SI:73 Formula:C10 H16 CAS:123-35-3 MolWeight:136 RetIndex:0

CompName:beta.-Myrcene \$\$ 1,6-Octadiene, 7-methyl-3-methylene- (CAS) 2-Methyl-6-methylene-2,7-octadiene \$\$ 2-ETHENYL-6-METHYL-1,5-HEPT

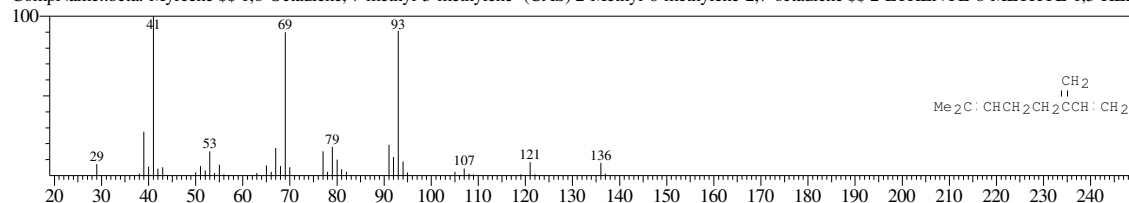

Hit#:4 Entry:36436 Library:WILEY7.LIB

SI:73 Formula:C8 H17 Cl CAS:111-85-3 MolWeight:148 RetIndex:0

CompName:Octane, 1-chloro- (CAS) 1-Chlorooctane \$\$ Octyl chloride \$\$ Capryl chloride \$\$ 1-Octyl chloride \$\$ n-Octyl chloride \$\$

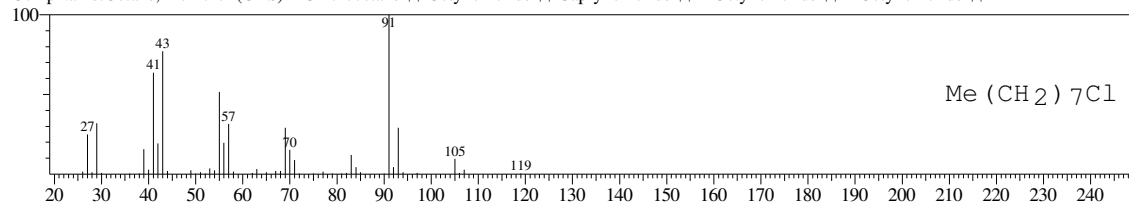

Hit#:5 Entry:107422 Library:WILEY7.LIB

SI:73 Formula:C10 H20 Cl2 CAS:2162-98-3 MolWeight:210 RetIndex:0

CompName:1,10-Dichlorodecane \$\$ Decane, 1,10-dichloro- \$\$ Decamethylene dichloride \$\$

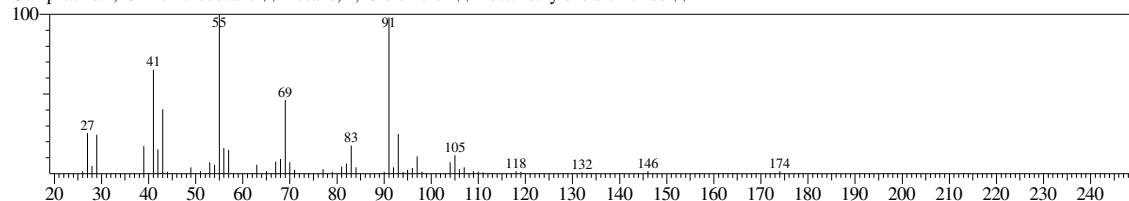

<< Target >>

Line#:13 R.Time:22.890(Scan#:2190) MassPeaks:17

RawMode:Averaged 22.880-22.900(2189-2191) BasePeak:91.05(4996)

BG Mode:Calc. from Peak Group 1 - Event 1

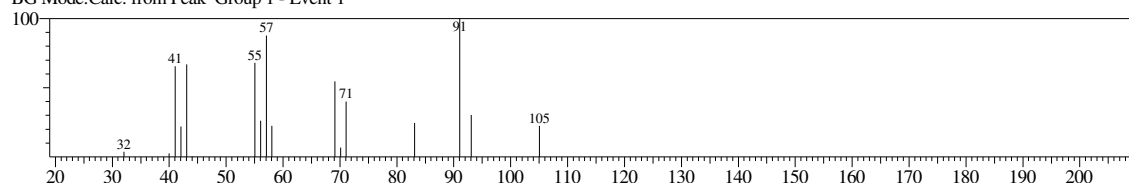

Hit#:1 Entry:67134 Library:WILEY7.LIB

SI:89 Formula:C10 H21 Cl CAS:1002-69-3 MolWeight:176 RetIndex:0

CompName:Decane, 1-chloro- (CAS) 1-Chlorodecane \$\$ Decyl chloride \$\$ n-Decyl chloride \$\$ 1-CHLORDECAN \$\$

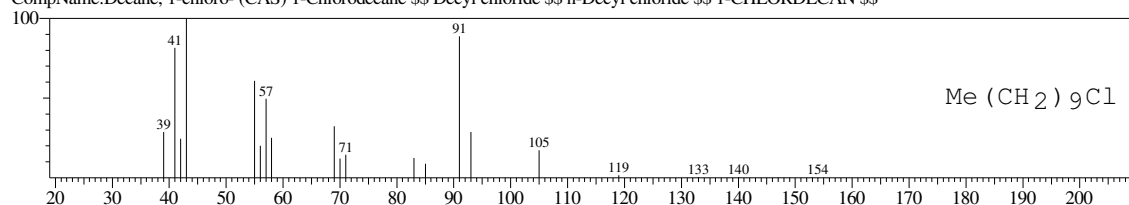

Hit#:2 Entry:50274 Library:WILEY7.LIB

SI:88 Formula:C10 H11 N O CAS:1611-83-2 MolWeight:161 RetIndex:0

CompName:2-Propenamide, 2-methyl-N-phenyl- \$\$ N-Phenylmethacrylamide \$\$ N-PHENYL-METHACRYLIC ACID AMIDE \$\$ Acrylanilide, 2-methyl

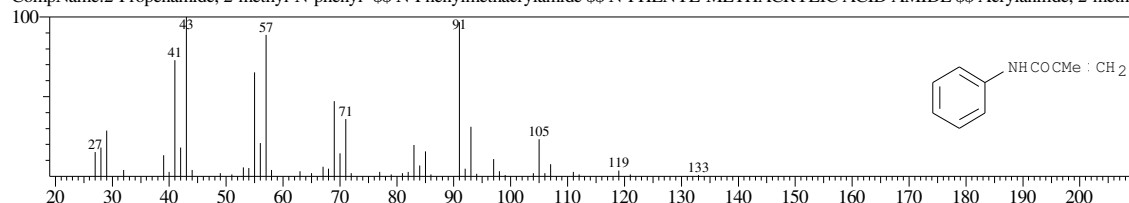

Hit#:3 Entry:36436 Library:WILEY7.LIB

SI:86 Formula:C8 H17 Cl CAS:111-85-3 MolWeight:148 RetIndex:0

CompName:Octane, 1-chloro- (CAS) 1-Chlorooctane \$\$ Octyl chloride \$\$ Capryl chloride \$\$ 1-Octyl chloride \$\$ n-Octyl chloride \$\$

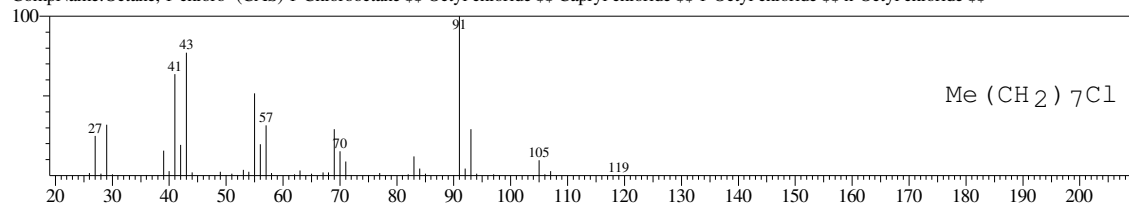

Hit#:4 Entry:36438 Library:WILEY7.LIB

SI:86 Formula:C8 H17 Cl CAS:111-85-3 MolWeight:148 RetIndex:0

CompName:Octane, 1-chloro- (CAS) 1-Chlorooctane \$\$ Octyl chloride \$\$ Capryl chloride \$\$ 1-Octyl chloride \$\$ n-Octyl chloride \$\$

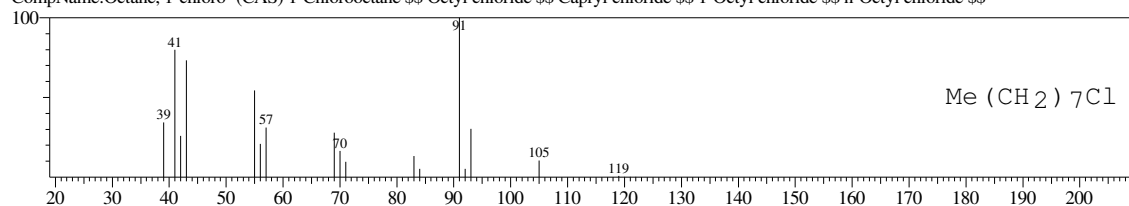

Hit#:5 Entry:100592 Library:WILEY7.LIB

SI:86 Formula:C12 H25 Cl CAS:112-52-7 MolWeight:204 RetIndex:0

CompName:Dodecane, 1-chloro- (CAS) 1-Chlorododecane \$\$ Lauryl chloride \$\$ Dodecyl chloride \$\$ n-Dodecyl chloride \$\$ 1-CHLORDODECAN \$\$

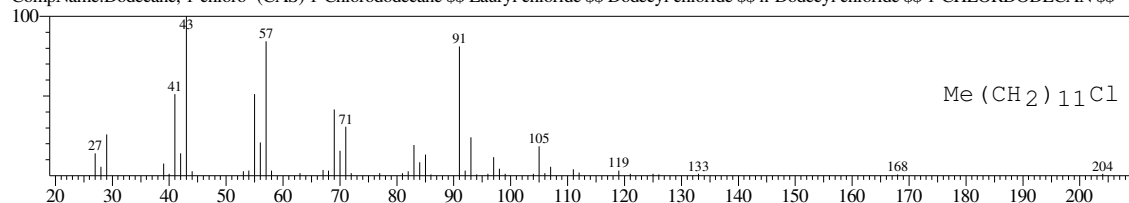

<< Target >>

Line#:14 R.Time:23.560(Scan#:2257) MassPeaks:8

RawMode:Averaged 23.550-23.570(2256-2258) BasePeak:109.05(3938)

BG Mode:Calc. from Peak Group 1 - Event 1

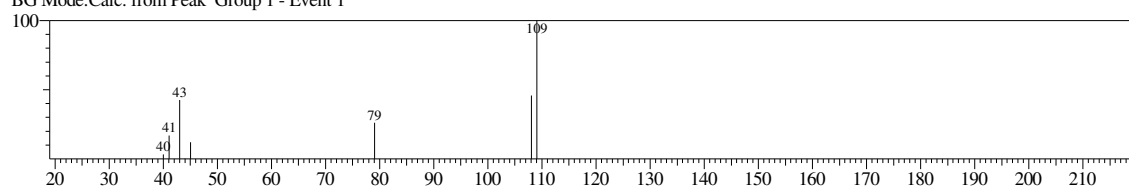

Hit#:1 Entry:55443 Library:WILEY7.LIB

SI:74 Formula:C11 H18 O CAS:37709-71-0 MolWeight:166 RetIndex:0

CompName:1-(1,3-DIMETHYLCYCLOHEX-2-ENYL)PROPAN-2-ONE \$2-2-Propanone, 1-(1,3-dimethyl-2-cyclohexen-1-yl)- (CAS)

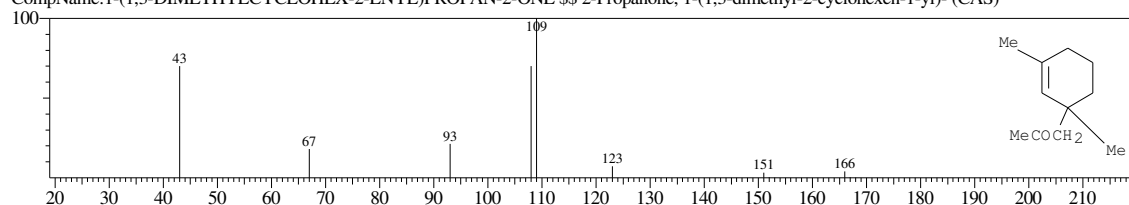

Hit#:2 Entry:73495 Library:WILEY7.LIB

SI:73 Formula:C11 H18 O2 CAS:0-00-0 MolWeight:182 RetIndex:0

CompName:(E)-5-ISOPROPYL-6-METHYL-5,6-EPOXY-HEPT-3-EN-2-ONE \$\$

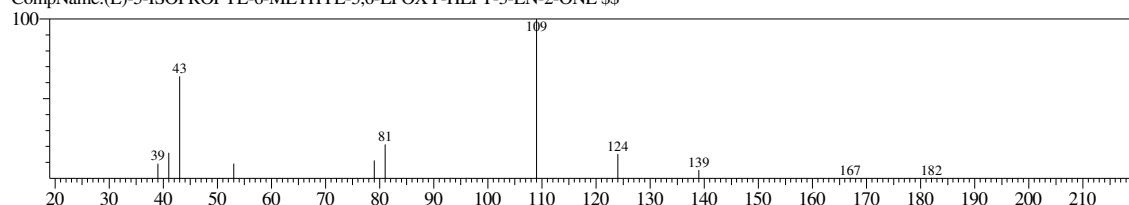

Hit#:3 Entry:55516 Library:WILEY7.LIB

SI:73 Formula:C11 H18 O CAS:702-81-8 MolWeight:166 RetIndex:0

CompName:3-METHYLADAMANTAN-1-OL \$Tricyclo[3.3.1.1(3,7)]decane-1-ol, 3-methyl- (CAS) 1-Adamantanol, 3-methyl- \$3-Methyl-1-adamantan

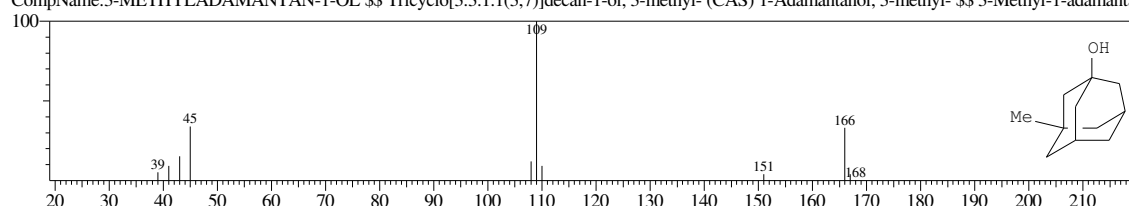

Hit#:4 Entry:115278 Library:WILEY7.LIB

SI:73 Formula:C14 H20 N2 CAS:18341-40-7 MolWeight:216 RetIndex:0

CompName:1,1'-Bicyclohexyl-1,1'-dicarbonitrile \$[1,1'-Bicyclohexyl]-1,1'-dicarbonitrile (CAS) [Bicyclohexyl]-1,1'-dicarbonitrile \$1,1'-Dicyanobicyclo

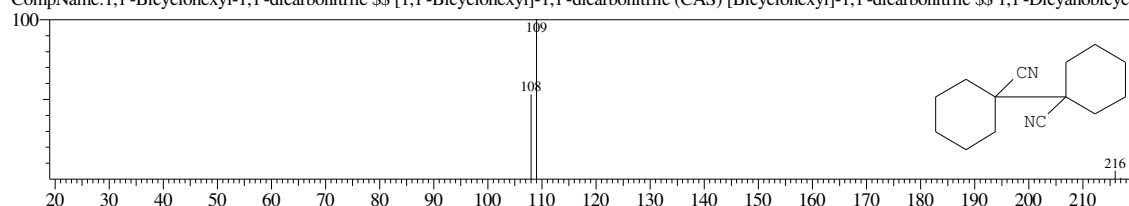

Hit#:5 Entry:9683 Library:WILEY7.LIB

SI:72 Formula:C6 H7 N O CAS:1192-58-1 MolWeight:109 RetIndex:0

CompName:2-Formyl-1-methylpyrrole \$1-METHYL-2-PYRROLECARBOXALDEHYDE (CAS) 1H-Pyrrole-2-carboxaldehyde, 1-methyl- \$N-Methyl

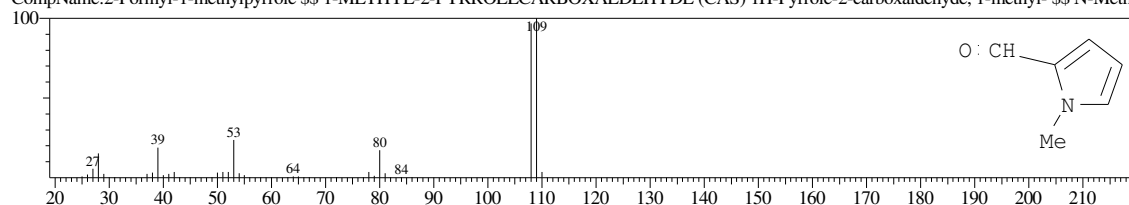



<< Target >>

Line#:15 R.Time:23.900(Scan#:2291) MassPeaks:23

RawMode:Averaged 23.890-23.910(2290-2292) BasePeak:55.05(5629)

BG Mode:Calc. from Peak Group 1 - Event 1

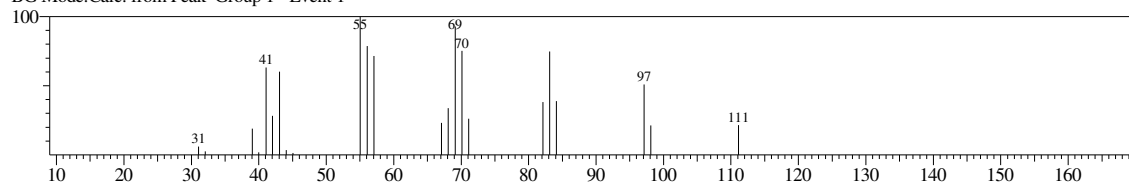

Hit#:1 Entry:63450 Library:WILEY7.LIB

SI:92 Formula:C11 H24 O CAS:112-42-5 MolWeight:172 RetIndex:0

CompName:1-Undecanol (CAS) n-Undecanol \$\$ 1-Hendecanol \$\$ n-Undecan-1-ol \$\$ Undecyl alcohol \$\$ Hendecyl alcohol \$\$ n-Undecyl alcohol \$\$ Hend

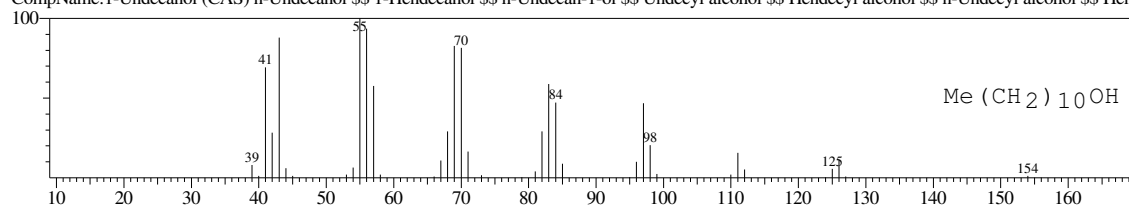

Hit#:2 Entry:79256 Library:WILEY7.LIB

SI:92 Formula:C12 H26 O CAS:112-53-8 MolWeight:186 RetIndex:0

CompName:1-Dodecanol (CAS) n-Dodecanol \$\$ CO 12 \$\$ S 1298 \$\$ Dodecanol \$\$ Pisol \$\$ Alfol 12 \$\$ Sipol L 12 \$\$ Lauryl 24 \$\$ Siponol 25 \$\$ Siponol

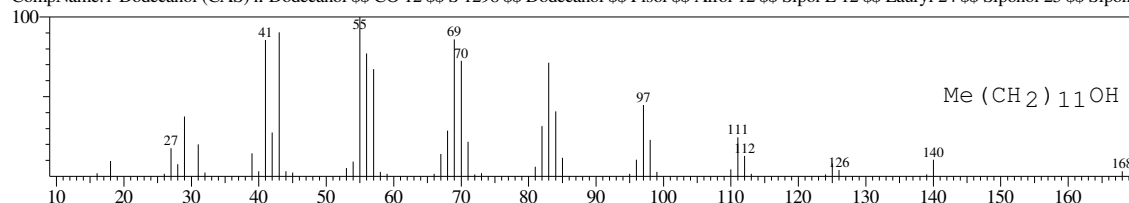

Hit#:3 Entry:79259 Library:WILEY7.LIB

SI:91 Formula:C12 H26 O CAS:112-53-8 MolWeight:186 RetIndex:0

CompName:1-Dodecanol (CAS) n-Dodecanol \$\$ CO 12 \$\$ S 1298 \$\$ Dodecanol \$\$ Pisol \$\$ Alfol 12 \$\$ Sipol L 12 \$\$ Lauryl 24 \$\$ Siponol 25 \$\$ Siponol

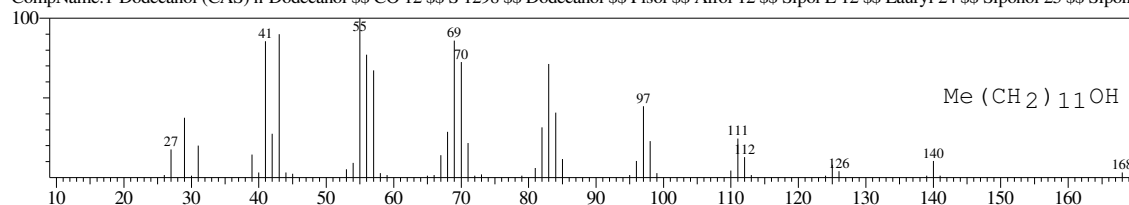

Hit#:4 Entry:63446 Library:WILEY7.LIB

SI:91 Formula:C11 H24 O CAS:112-42-5 MolWeight:172 RetIndex:0

CompName:1-Undecanol (CAS) n-Undecanol \$\$ 1-Hendecanol \$\$ n-Undecan-1-ol \$\$ Undecyl alcohol \$\$ Hendecyl alcohol \$\$ n-Undecyl alcohol \$\$ Hend

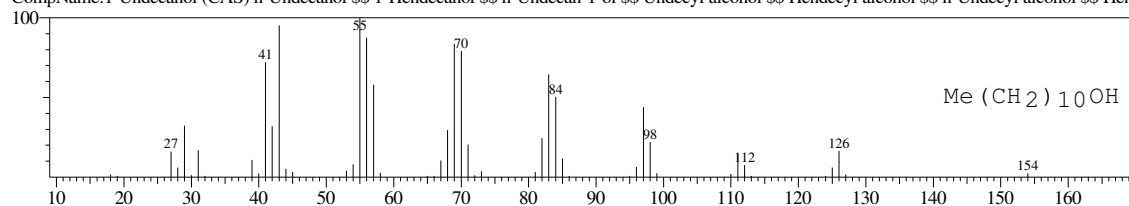

Hit#:5 Entry:79260 Library:WILEY7.LIB

SI:91 Formula:C12 H26 O CAS:112-53-8 MolWeight:186 RetIndex:0

CompName:1-Dodecanol (CAS) n-Dodecanol \$\$ CO 12 \$\$ S 1298 \$\$ Dodecanol \$\$ Pisol \$\$ Alfol 12 \$\$ Sipol L 12 \$\$ Lauryl 24 \$\$ Siponol 25 \$\$ Siponol

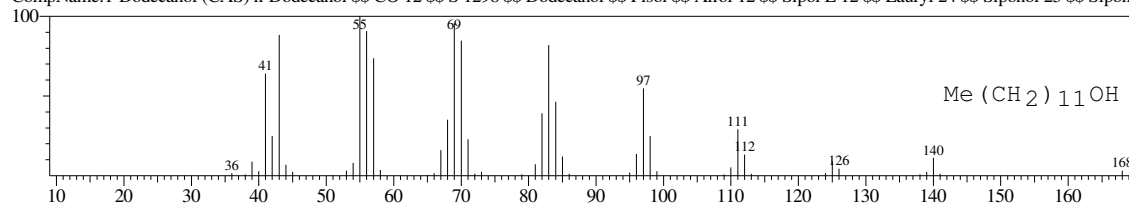

<< Target >>

Line# 16 R.Time:24.540(Scan#:2355) MassPeaks:7

RawMode:Averaged 24.530-24.550(2354-2356) BasePeak:43.05(1337)

BG Mode:Calc. from Peak Group 1 - Event 1

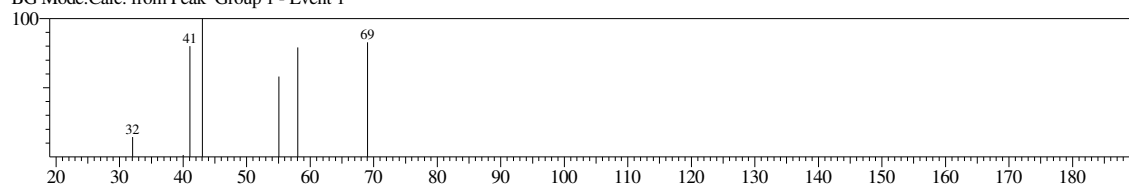

Hit#1 Entry:130698 Library:WILEY7.LIB

SI:83 Formula:C13 H24 O3 CAS:84115-20-8 MolWeight:228 RetIndex:0

CompName:10-Oxoundecyl acetate \$ 2-Undecanone, 11-(acetyloxy)- (CAS)

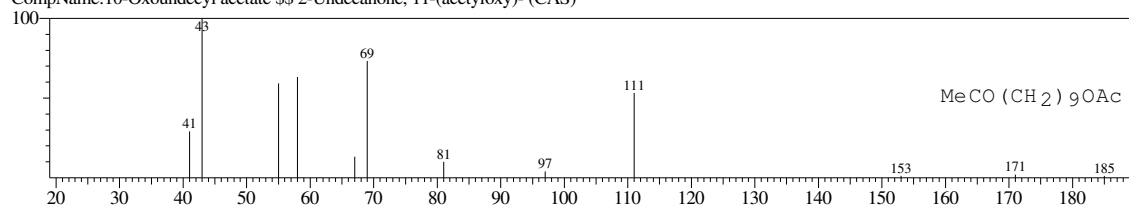

Hit#2 Entry:61610 Library:WILEY7.LIB

SI:79 Formula:C9 H17 N O2 CAS:119880-62-5 MolWeight:171 RetIndex:0

CompName:(Z)-2-methyl-1-nitro-1-octene \$ 1-Octene, 2-methyl-1-nitro-, (Z)- (CAS)

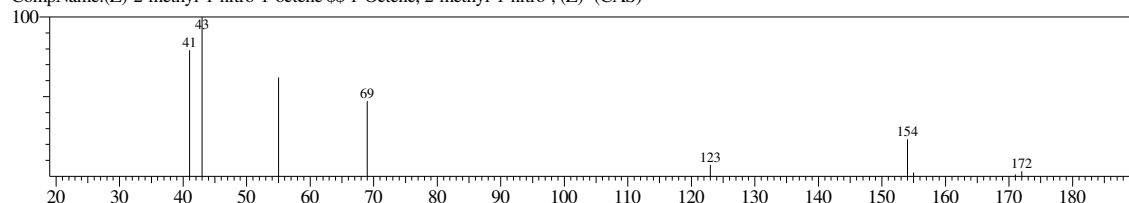

Hit#3 Entry:18900 Library:WILEY7.LIB

SI:78 Formula:C8 H14 O CAS:110-93-0 MolWeight:126 RetIndex:0

CompName:6-Methyl-5-hepten-2-one \$ 5-Hepten-2-one, 6-methyl- (CAS) 6-Methyl-5-heptene-2-one \$ 6-METHYLHEPT-5-EN-2-ONE \$ (6-methyl)-

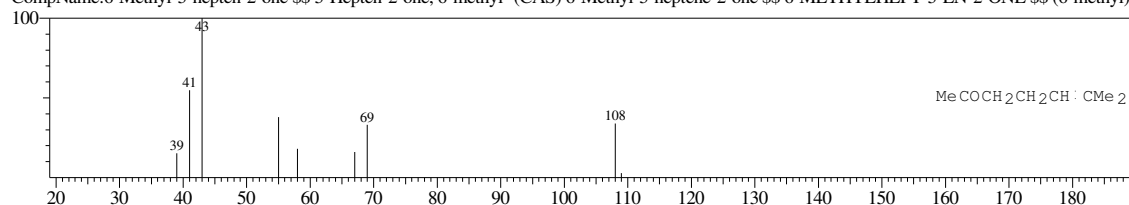

Hit#4 Entry:20552 Library:WILEY7.LIB

SI:77 Formula:C8 H16 O CAS:23186-70-1 MolWeight:128 RetIndex:0

CompName:Pentane, 1-(2-propenyloxy)- (CAS) Pentyl allyl ether \$ Allyl pentyl ether \$ Ether, allyl pentyl \$

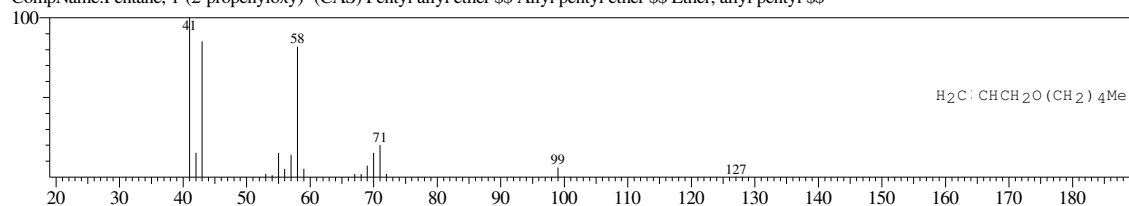

Hit#5 Entry:2812 Library:WILEY7.LIB

SI:77 Formula:C5 H8 O CAS:765-43-5 MolWeight:84 RetIndex:0

CompName:Ethanone, 1-cyclopropyl- (CAS) Cyclopropyl methyl ketone \$ Methyl cyclopropyl ketone \$ Acetylcyclopropane \$ Ketone, cyclopropyl met

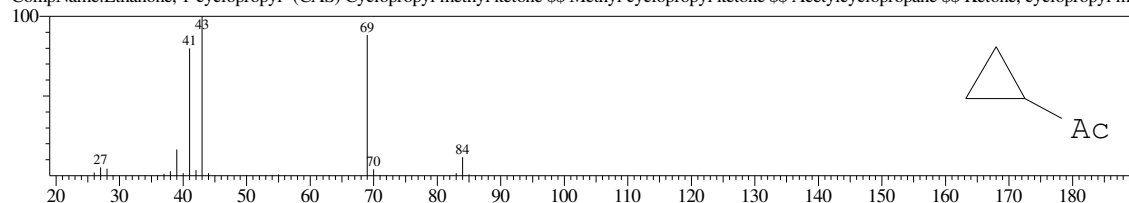

<< Target >>

Line#:17 R.Time:26.170(Scan#:2518) MassPeaks:10

RawMode:Averaged 26.160-26.180(2517-2519) BasePeak:42.05(1403)

BG Mode:Calc. from Peak Group 1 - Event 1

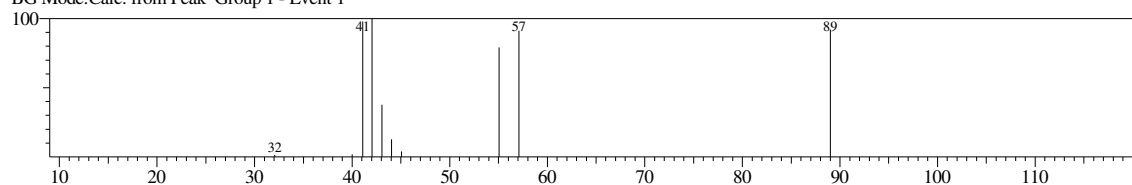

Hit#:1 Entry:9114 Library:WILEY7.LIB

SI:78 Formula:C4 H9 Cl O CAS:10317-10-9 MolWeight:108 RetIndex:0

CompName:3-Chloro-2-methyl-1-propanol \$\$ 1-Propanol, 3-chloro-2-methyl- (CAS) 2-Chloromethylpropanol \$\$

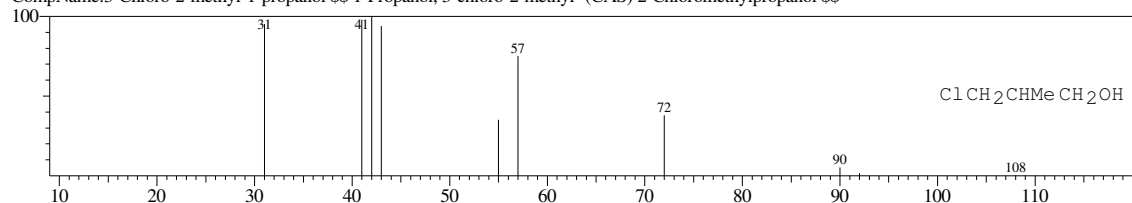

Hit#:2 Entry:4071 Library:WILEY7.LIB

SI:77 Formula:C5 H12 O CAS:71-41-0 MolWeight:88 RetIndex:0

CompName:1-Pentanol (CAS) Amylol \$\$ n-Pentanol \$\$ Amyl alcohol \$\$ n-Pentan-1-ol \$\$ Pentanol \$\$ n-Amyl alcohol \$\$ Pentyl alcohol \$\$ n-Butyl carbir

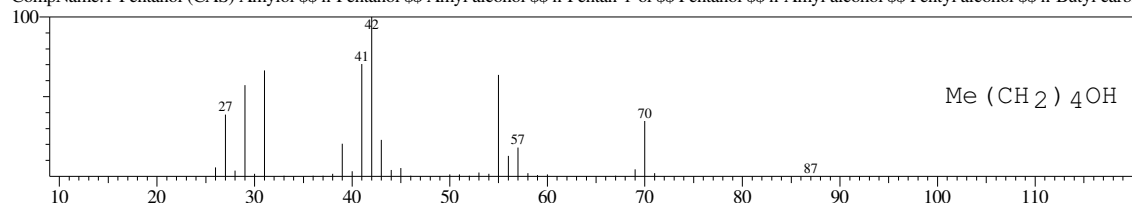

Hit#:3 Entry:4134 Library:WILEY7.LIB

SI:77 Formula:C5 H12 O CAS:123-51-3 MolWeight:88 RetIndex:0

CompName:1-Butanol, 3-methyl- (CAS) 3-Methyl-1-butanol \$\$ Isopentanol \$\$ 3-Methylbutanol \$\$ Fusel oil \$\$ Isoamylol \$\$ Isoamyl alcohol \$\$ Isobutyl c

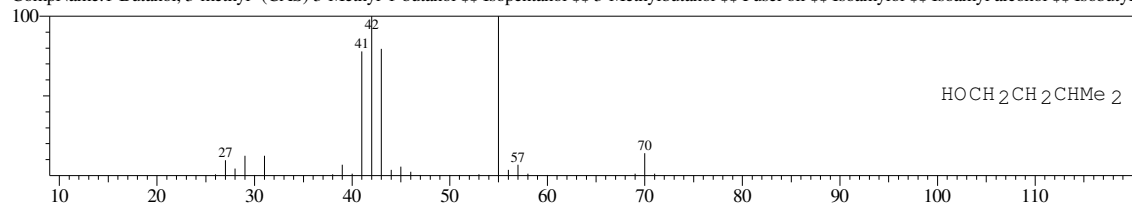

Hit#:4 Entry:4081 Library:WILEY7.LIB

SI:76 Formula:C5 H12 O CAS:71-41-0 MolWeight:88 RetIndex:0

CompName:1-Pentanol (CAS) Amylol \$\$ n-Pentanol \$\$ Amyl alcohol \$\$ n-Pentan-1-ol \$\$ Pentanol \$\$ n-Amyl alcohol \$\$ Pentyl alcohol \$\$ n-Butyl carbir

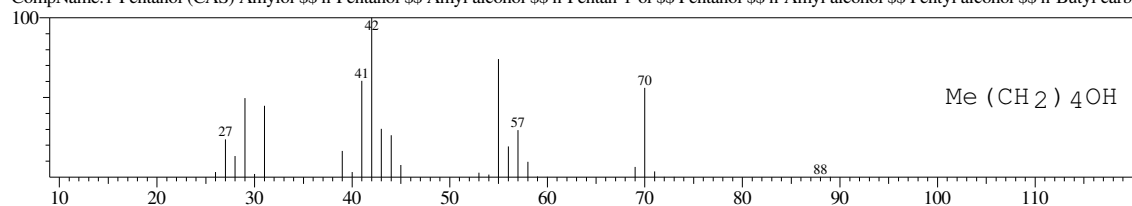

Hit#:5 Entry:4143 Library:WILEY7.LIB

SI:76 Formula:C5 H12 O CAS:123-51-3 MolWeight:88 RetIndex:0

CompName:1-Butanol, 3-methyl- (impure) (CAS) 3-Methyl-1-butanol \$\$ Isopentanol \$\$ 3-Methylbutanol \$\$ Fusel oil \$\$ Isoamylol \$\$ Isoamyl alcohol \$\$

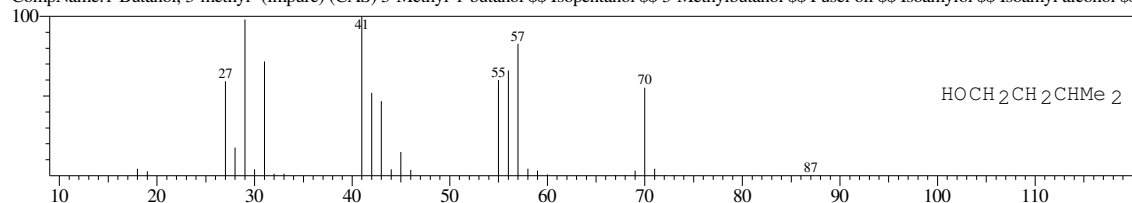

<< Target >>

Line# 18 R.Time:26.870(Scan#:2588) MassPeaks:17

RawMode:Averaged 26.860-26.880(2587-2589) BasePeak:73.05(3991)

BG Mode:Calc. from Peak Group 1 - Event 1

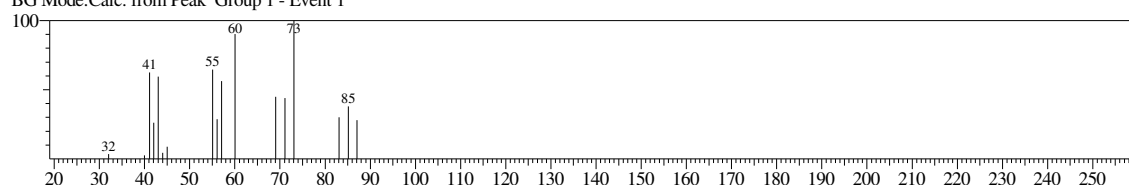

Hit#1 Entry:164469 Library:WILEY7.LIB

SI:83 Formula:C16 H32 O2 CAS:57-10-3 MolWeight:256 RetIndex:0

CompName:Hexadecanoic acid (CAS) Palmitic acid \$\$ Palmitinic acid \$\$ n-Hexadecic acid \$\$ n-Hexadecanoic acid \$\$ Pentadecanecarboxylic acid \$\$ 1-

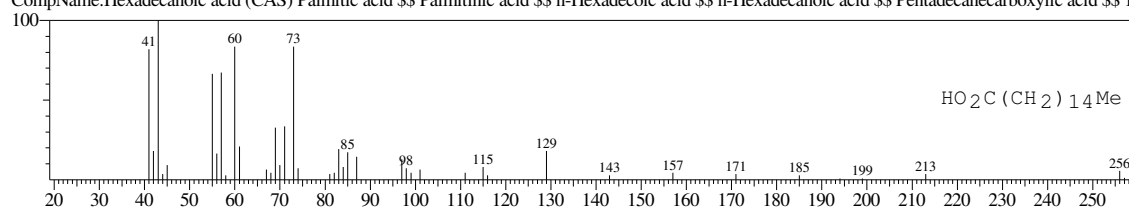

Hit#2 Entry:63223 Library:WILEY7.LIB

SI:82 Formula:C10 H20 O2 CAS:334-48-5 MolWeight:172 RetIndex:0

CompName:Decanoic acid (CAS) Capric acid \$\$ Decic acid \$\$ Decylic acid \$\$ Caprynic acid \$\$ Caprinic acid \$\$ n-Decoic acid \$\$ n-Capric acid \$\$ n-De

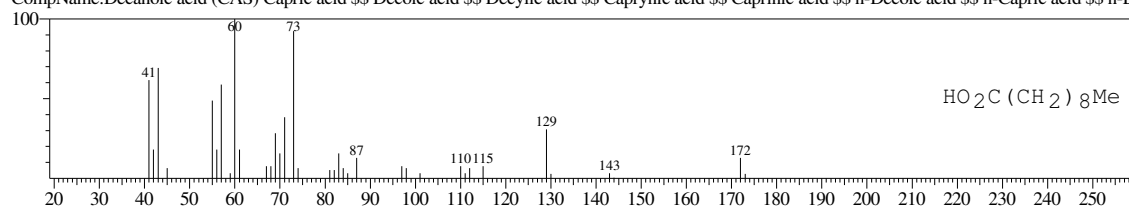

Hit#3 Entry:180843 Library:WILEY7.LIB

SI:82 Formula:C15 H29 N O3 CAS:97-78-9 MolWeight:271 RetIndex:0

CompName:Glycine, N-methyl-N-(1-oxododecyl)- \$\$ Sarcosine, N-lauroyl- \$\$ Hamposyl I \$\$ Lauroyl sarcosine \$\$ Lauroylsarcosine \$\$ Maprosyl I \$\$ N-I

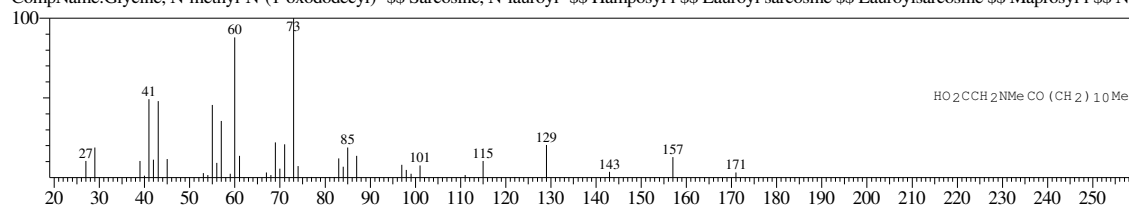

Hit#4 Entry:63219 Library:WILEY7.LIB

SI:81 Formula:C10 H20 O2 CAS:334-48-5 MolWeight:172 RetIndex:0

CompName:Decanoic acid (CAS) Capric acid \$\$ Decic acid \$\$ Decylic acid \$\$ Caprynic acid \$\$ Caprinic acid \$\$ n-Decoic acid \$\$ n-Capric acid \$\$ n-De

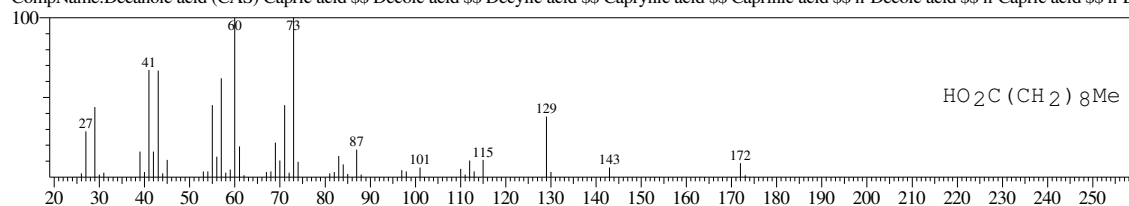

Hit#5 Entry:63220 Library:WILEY7.LIB

SI:81 Formula:C10 H20 O2 CAS:334-48-5 MolWeight:172 RetIndex:0

CompName:Decanoic acid (CAS) Capric acid \$\$ Decic acid \$\$ Decylic acid \$\$ Caprynic acid \$\$ Caprinic acid \$\$ n-Decoic acid \$\$ n-Capric acid \$\$ n-De

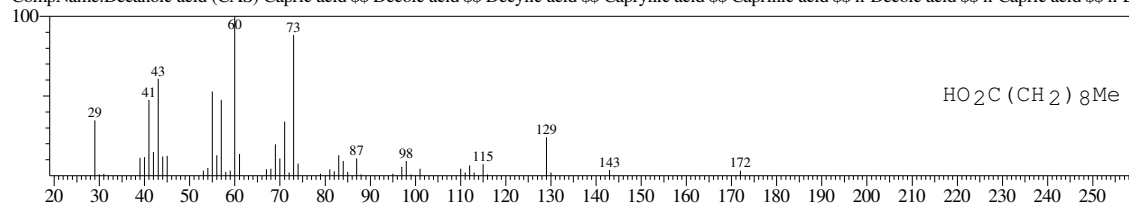

<< Target >>

Line#:19 R.Time:27.420(Scan#:2643) MassPeaks:7

RawMode:Averaged 27.410-27.430(2642-2644) BasePeak:71.10(1388)

BG Mode:Calc. from Peak Group 1 - Event 1

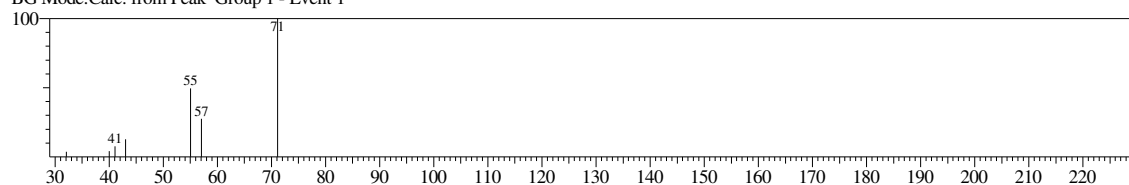

Hit#:1 Entry:21272 Library:WILEY7.LIB

SI:83 Formula:C5 13C H10 O3 CAS:0-00-0 MolWeight:130 RetIndex:0

CompName:3-hydroxy-4,4-dimethyldihydro(2-13C)furan-2-one \$\$

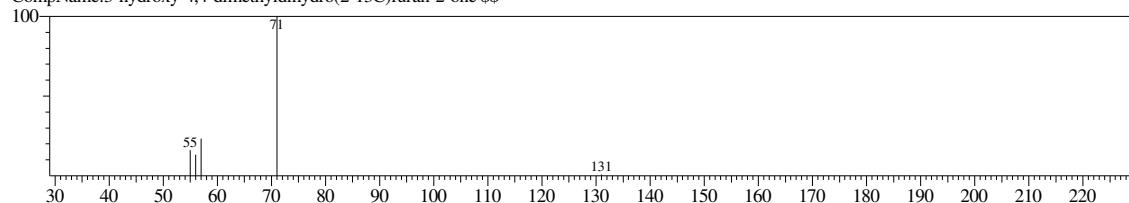

Hit#:2 Entry:91919 Library:WILEY7.LIB

SI:82 Formula:C4 H7 I O CAS:76282-41-2 MolWeight:198 RetIndex:0

CompName:(S)-4-Iodo-1,2-epoxybutane \$\$

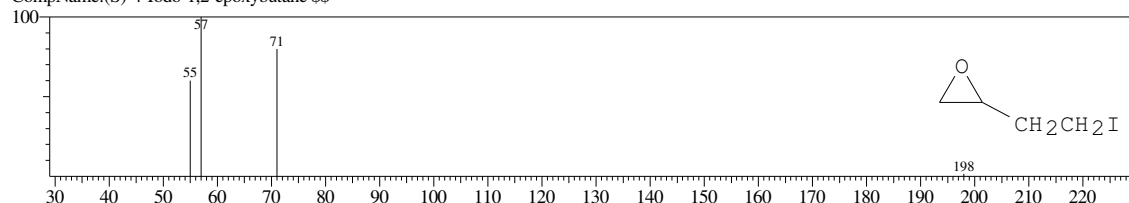

Hit#:3 Entry:58135 Library:WILEY7.LIB

SI:82 Formula:C11 H20 O CAS:3208-42-2 MolWeight:168 RetIndex:0

CompName:2-(cyclohexyl)methyltetrahydrofuran Furan, 2-(cyclohexylmethyl)tetrahydro- (CAS)

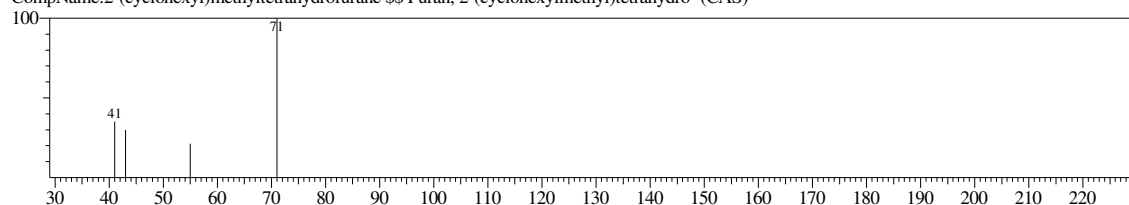

Hit#:4 Entry:44966 Library:WILEY7.LIB

SI:80 Formula:C8 H12 O3 CAS:60378-33-8 MolWeight:156 RetIndex:0

CompName:4-(2-TETRAHYDROFURANYL)-BUTYROLACTONE \$\$ [2,2'-Bifuran]-5(2H)-one, hexahydro-, (R\*,R\*)- (CAS)

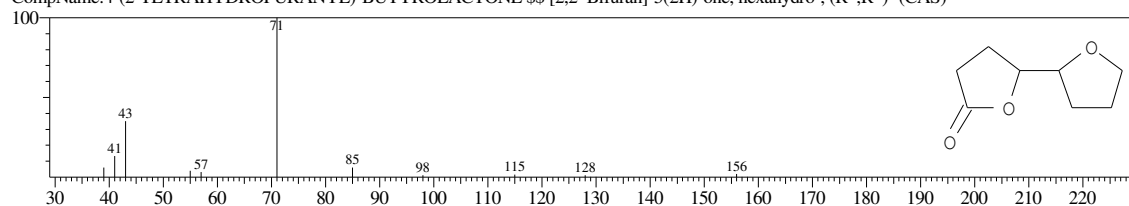

Hit#:5 Entry:122124 Library:WILEY7.LIB

SI:80 Formula:C10 H22 O S2 CAS:78607-80-4 MolWeight:222 RetIndex:0

CompName:2,2-Dimethylpropyl 2,2-dimethylpropanethiosulfinate \$\$ 1-Propanesulfinothioic acid, 2,2-dimethyl-, S-(2,2-dimethylpropyl) ester (CAS) Neop

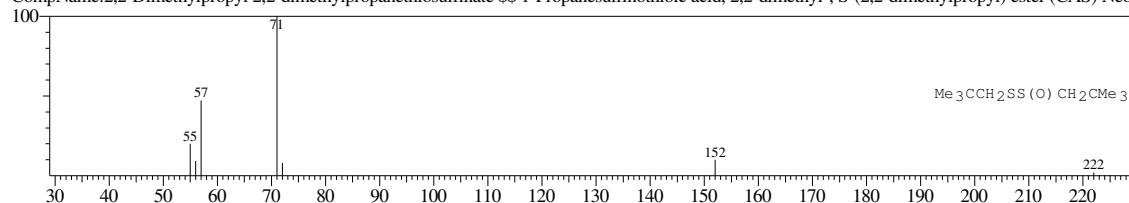

<< Target >>

Line#:20 R.Time:27.910(Scan#:2692) MassPeaks:10

RawMode:Averaged 27.900-27.920(2691-2693) BasePeak:57.05(2815)

BG Mode:Calc. from Peak Group 1 - Event 1

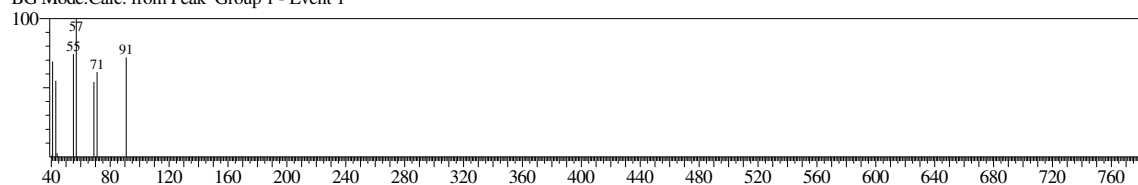

Hit#:1 Entry:336061 Library:WILEY7.LIB

SI:93 Formula:C48 H40 N2 O6 S CAS:0-00-0 MolWeight:772 RetIndex:0

CompName:Bis-[3-oxo-6'-diethylamino-spiro(phthalan-1,9'-xanth-2'-yl)sulphide

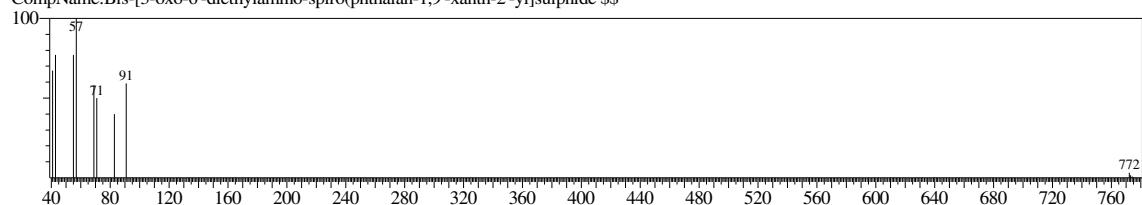

Hit#:2 Entry:168858 Library:WILEY7.LIB

SI:89 Formula:C16 H33 Cl CAS:4860-03-1 MolWeight:260 RetIndex:0

CompName:Hexadecane, 1-chloro- (CAS) 1-Chlorohexadecane Cetyl chloride Hexadecyl chloride Palmityl chloride 1-Chloro-hexadecane

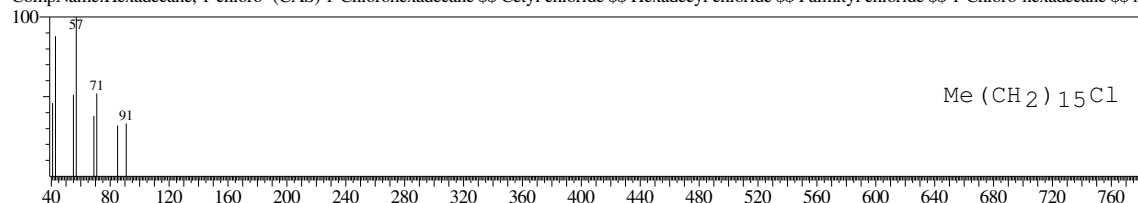

Hit#:3 Entry:292771 Library:WILEY7.LIB

SI:83 Formula:C23 H30 O3 S2 CAS:97644-69-4 MolWeight:418 RetIndex:0

CompName:(4.alpha.,10.beta.,15S)-4-carbomethoxy-3-desoxy-15-hydroxy-4-methyl-17,17-(ethylenedithio)-18-norandrost-8,11,13-triene (4.alpha.,10.b

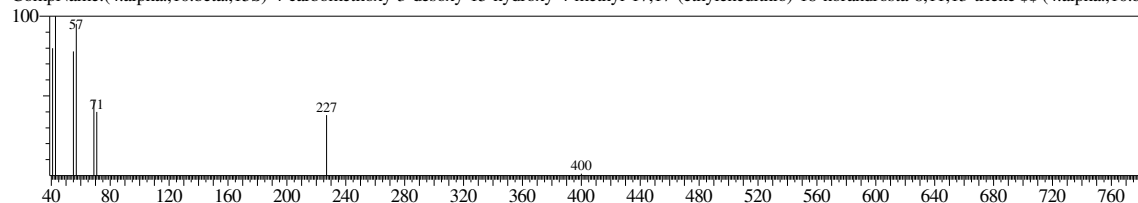

Hit#:4 Entry:311356 Library:WILEY7.LIB

SI:83 Formula:C23 H14 BR N3 O4 CAS:90181-05-8 MolWeight:475 RetIndex:0

CompName:1-(7-bromoquinoline-5,8-quinon-2-yl)-3-(methoxy-carbonyl)-4-methyl-beta-carboline 9H-Pyrido[3,4-b]indole-3-carboxylic acid, 1-(7-bron

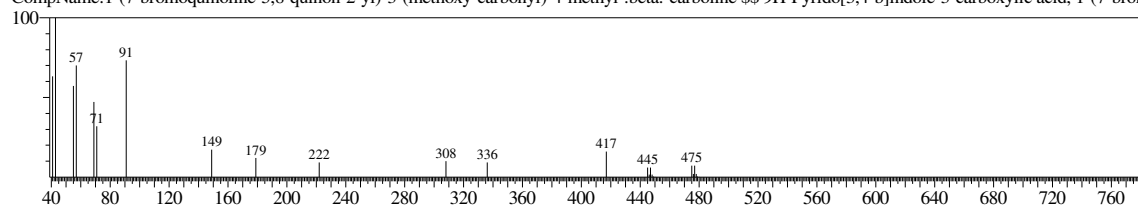

Hit#:5 Entry:95463 Library:WILEY7.LIB

SI:83 Formula:C13 H28 O CAS:0-00-0 MolWeight:200 RetIndex:0

CompName:2-Propyldecan-1-ol

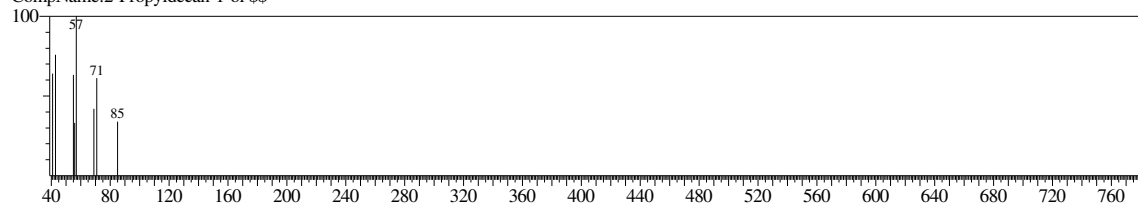

<< Target >>

Line#:21 R.Time:28.790(Scan#:2780) MassPeaks:16

RawMode:Averaged 28.780-28.800(2779-2781) BasePeak:69.10(2790)

BG Mode:Calc. from Peak Group 1 - Event 1

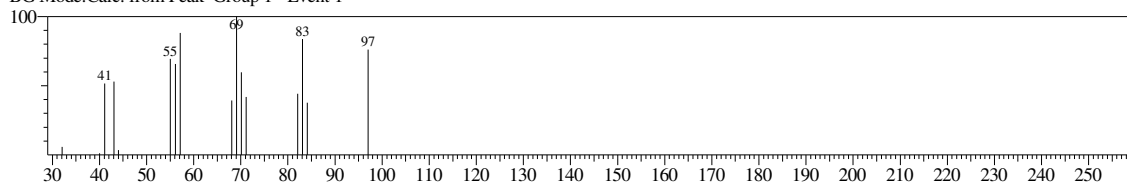

Hit#:1 Entry:148432 Library:WILEY7.LIB

SI:88 Formula:C16 H34 O CAS:36653-82-4 MolWeight:242 RetIndex:0

CompName:1-Hexadecanol (CAS) Cetal \$\$ Ethal \$\$ Ethol \$\$ Cetanol \$\$ Cetylol \$\$ Adol 52 \$\$ Lanol C \$\$ Adol 54 \$\$ Lorol 24 \$\$ Alfol 16 \$\$ Aldol 54 \$

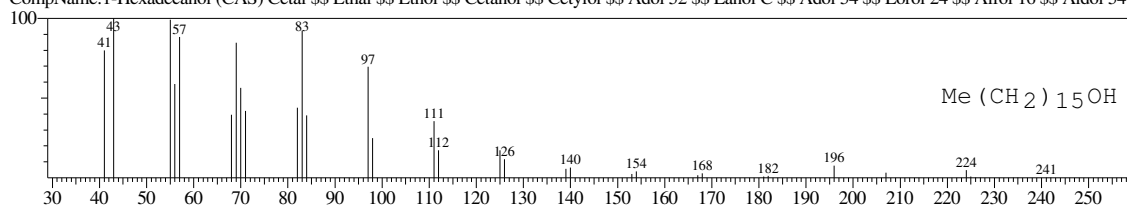

Hit#:2 Entry:180537 Library:WILEY7.LIB

SI:87 Formula:C18 H38 O CAS:112-92-5 MolWeight:270 RetIndex:0

CompName:1-Octadecanol (CAS) Stenol \$\$ Sipol S \$\$ Stearol \$\$ Lanol S \$\$ Aldol 62 \$\$ Alfol 18 \$\$ Lorol 28 \$\$ Atalco S \$\$ Siponol S \$\$ Crodacol-S \$\$

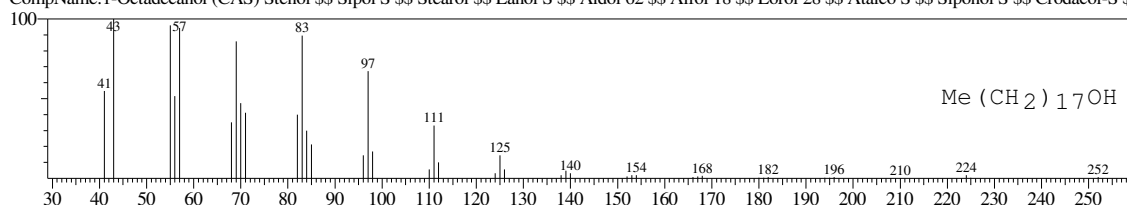

Hit#:3 Entry:180539 Library:WILEY7.LIB

SI:86 Formula:C18 H38 O CAS:112-92-5 MolWeight:270 RetIndex:0

CompName:1-Octadecanol (CAS) Stenol \$\$ Sipol S \$\$ Stearol \$\$ Lanol S \$\$ Aldol 62 \$\$ Alfol 18 \$\$ Lorol 28 \$\$ Atalco S \$\$ Siponol S \$\$ Crodacol-S \$\$

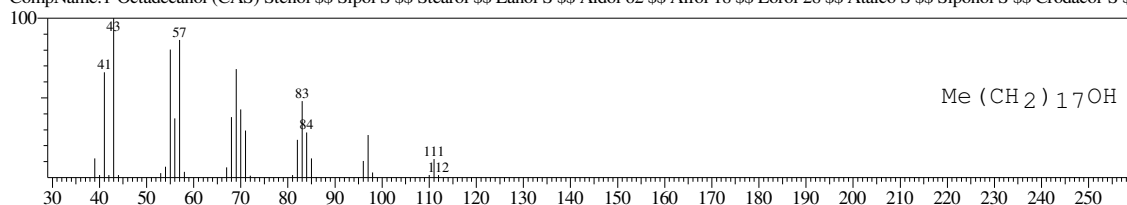

Hit#:4 Entry:79270 Library:WILEY7.LIB

SI:85 Formula:C12 H26 O CAS:112-53-8 MolWeight:186 RetIndex:0

CompName:1-Dodecanol (CAS) n-Dodecanol \$\$ CO 12 \$\$ S 1298 \$\$ Dodecanol \$\$ Pisol \$\$ Alfol 12 \$\$ Sipol L 12 \$\$ Lauryl 24 \$\$ Siponol 25 \$\$ Siponol

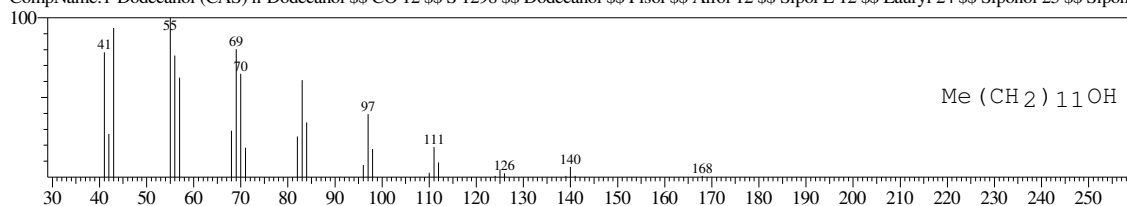

Hit#:5 Entry:113625 Library:WILEY7.LIB

SI:84 Formula:C14 H30 O CAS:112-72-1 MolWeight:214 RetIndex:0

CompName:1-Tetradecanol (CAS) Alfol 14 \$\$ Tetradecanol \$\$ Loxanol V \$\$ Lanette K \$\$ Lanette Wax KS \$\$ n-Tetradecanol \$\$ Myristic alcohol \$\$ Myr

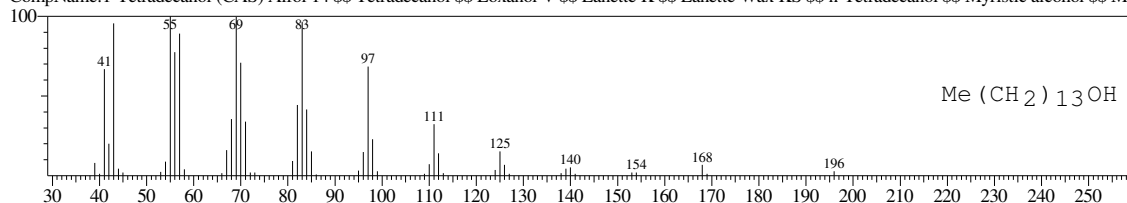

<< Target >>

Line#:22 R.Time:29.330(Scan#:2834) MassPeaks:9

RawMode:Averaged 29.320-29.340(2833-2835) BasePeak:58.05(1730)

BG Mode:Calc. from Peak Group 1 - Event 1

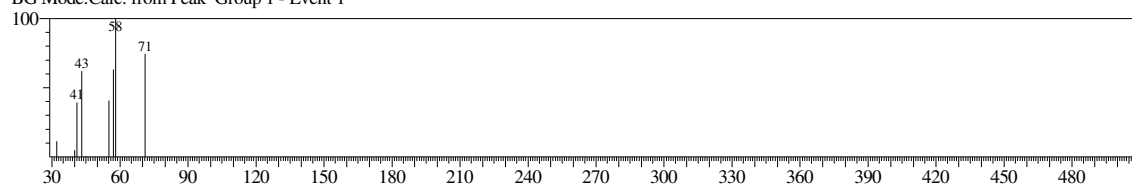

Hit#:1 Entry:31170 Library:WILEY7.LIB

SI:90 Formula:C9 H18 O CAS:37114-55-9 MolWeight:142 RetIndex:0

CompName:2-hexylallyl alcohol \$\$

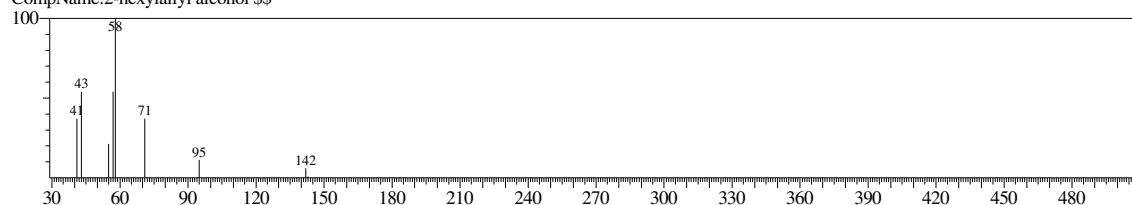

Hit#:2 Entry:129182 Library:WILEY7.LIB

SI:85 Formula:C15 H30 O CAS:0-00-0 MolWeight:226 RetIndex:0

CompName:2-Methyltetradecanal \$\$

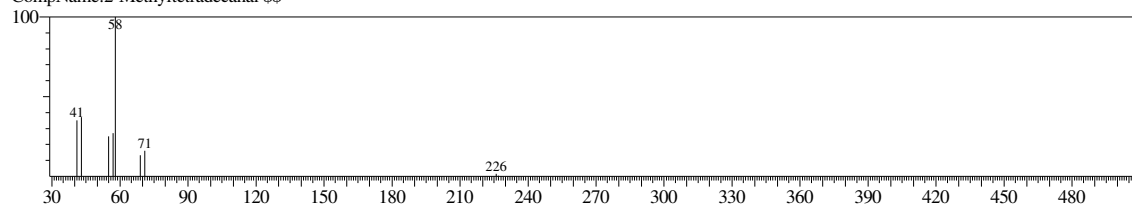

Hit#:3 Entry:60682 Library:WILEY7.LIB

SI:84 Formula:C11 H22 O CAS:29580-00-5 MolWeight:170 RetIndex:0

CompName:2-octylallyl alcohol \$\$

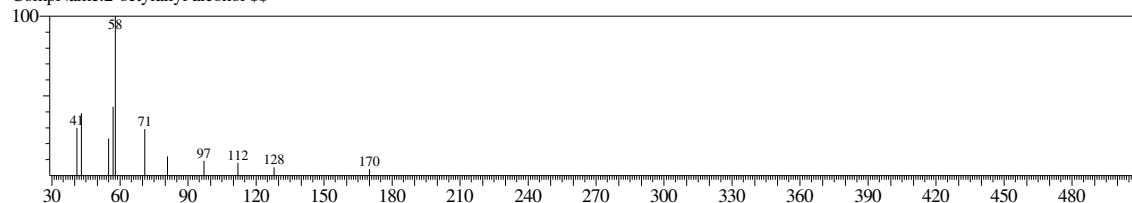

Hit#:4 Entry:317945 Library:WILEY7.LIB

SI:82 Formula:C35 H70 O CAS:504-53-0 MolWeight:507 RetIndex:0

CompName:18-Pentatriacontanone (CAS) Stearyl ketone \$\$ Stearone \$\$ Heptadecyl ketone \$\$ Diheptadecyl ketone \$\$ Di-n-heptadecyl ketone \$\$ Di-steary

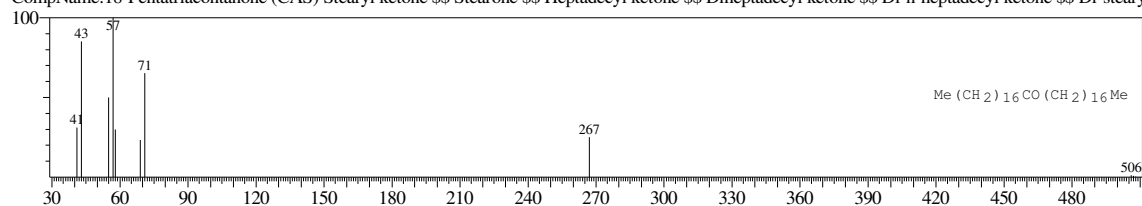

Hit#:5 Entry:93069 Library:WILEY7.LIB

SI:81 Formula:C13 H26 O CAS:37596-36-4 MolWeight:198 RetIndex:0

CompName:2-Methyldodecanal \$\$ Dodecanal, 2-methyl- (CAS) 2-Methyl-dodecanal \$\$

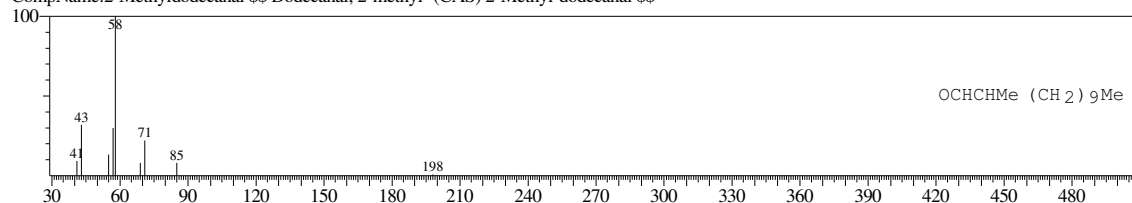



<< Target >>

Line#:23 R.Time:31.360(Scan#:3037) MassPeaks:19

RawMode:Averaged 31.350-31.370(3036-3038) BasePeak:77.05(1309)

BG Mode:Calc. from Peak Group 1 - Event 1

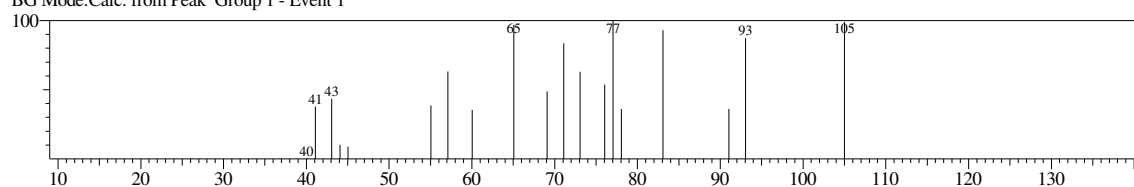

Hit#:1 Entry:8832 Library:WILEY7.LIB

SI:64 Formula:C5 H11 CL CAS:594-36-5 MolWeight:106 RetIndex:0

CompName:Butane, 2-chloro-2-methyl- (CAS) tert-Amyl chloride \$\$ 2-Chloro-2-methylbutane \$\$ tert-Pentyl chloride \$\$ Tertiary pentyl chloride \$\$ 2-Met

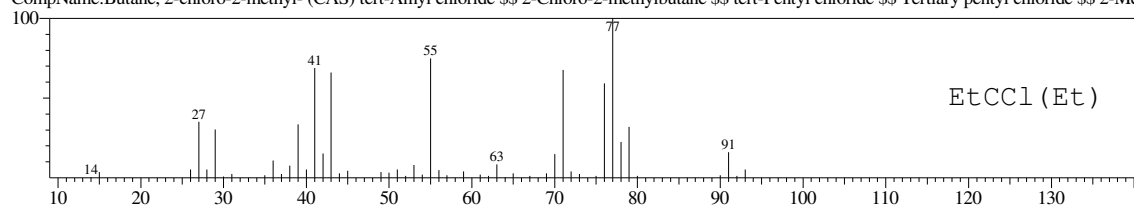

Hit#:2 Entry:8833 Library:WILEY7.LIB

SI:64 Formula:C5 H11 CL CAS:594-36-5 MolWeight:106 RetIndex:0

CompName:Butane, 2-chloro-2-methyl- (CAS) tert-Amyl chloride \$\$ 2-Chloro-2-methylbutane \$\$ tert-Pentyl chloride \$\$ Tertiary pentyl chloride \$\$ 2-Met

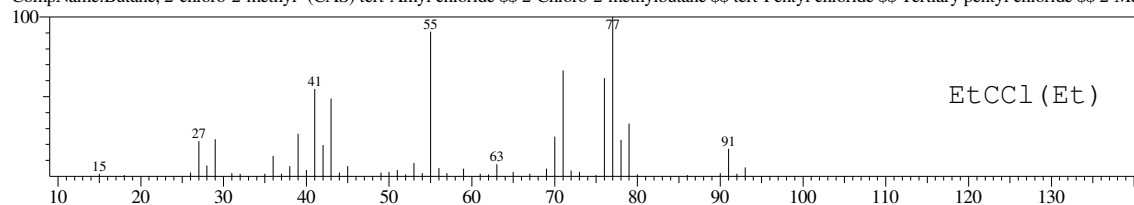

Hit#:3 Entry:8836 Library:WILEY7.LIB

SI:63 Formula:C5 H11 CL CAS:594-36-5 MolWeight:106 RetIndex:0

CompName:Butane, 2-chloro-2-methyl- (CAS) tert-Amyl chloride \$\$ 2-Chloro-2-methylbutane \$\$ tert-Pentyl chloride \$\$ Tertiary pentyl chloride \$\$ 2-Met

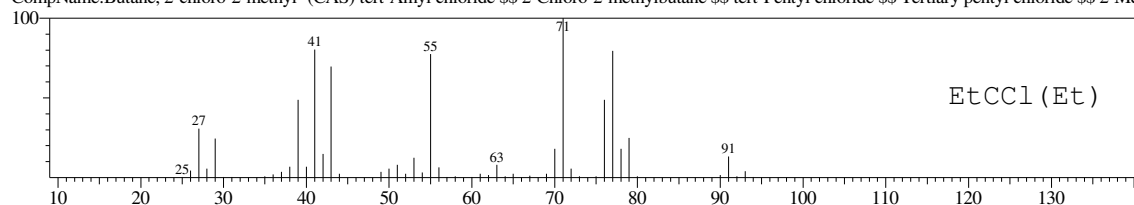

Hit#:4 Entry:8834 Library:WILEY7.LIB

SI:62 Formula:C5 H11 CL CAS:594-36-5 MolWeight:106 RetIndex:0

CompName:Butane, 2-chloro-2-methyl- (CAS) tert-Amyl chloride \$\$ 2-Chloro-2-methylbutane \$\$ tert-Pentyl chloride \$\$ Tertiary pentyl chloride \$\$ 2-Met

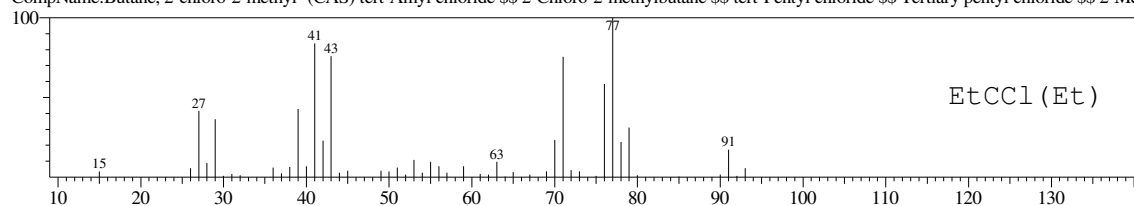

Hit#:5 Entry:126630 Library:WILEY7.LIB

SI:62 Formula:C14 H24 O2 CAS:78-36-4 MolWeight:224 RetIndex:0

CompName:Linalyl butyrate \$\$ LINALYL BUTANOATE \$\$ 1,5-Dimethyl-1-vinyl-4-hexenyl butyrate \$\$ Butanoic acid, 1-ethenyl-1,5-dimethyl-4-hexenyl

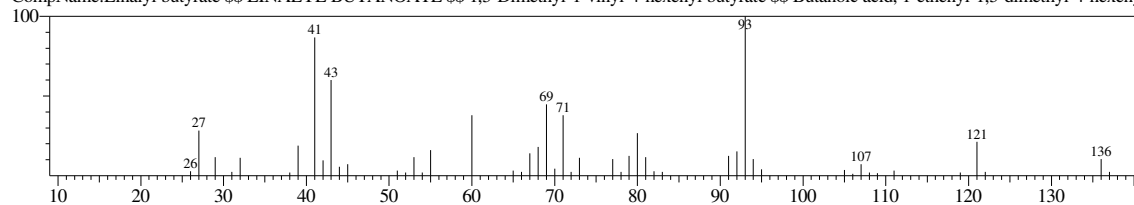

<< Target >>

Line#:24 R.Time:32.070(Scan#:3108) MassPeaks:34

RawMode:Averaged 32.060-32.080(3107-3109) BasePeak:45.05(17797)

BG Mode:Calc. from Peak Group 1 - Event 1

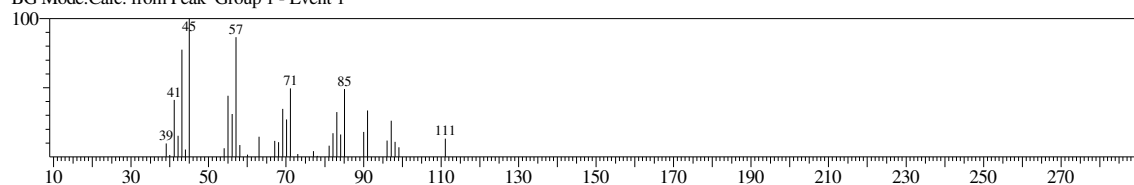

Hit#:1 Entry:133808 Library:WILEY7.LIB

SI:84 Formula:C14 H30 O2 CAS:4536-30-5 MolWeight:230 RetIndex:0

CompName:Ethanol, 2-(dodecyloxy)- (CAS) DODECOXYETHANOL \$\$ 2-Dodecyloxyethanol \$\$ Laureth-1 \$\$ Lipocol 1-1 \$\$ Lauryl ethoxylate \$\$ 2-(Dc

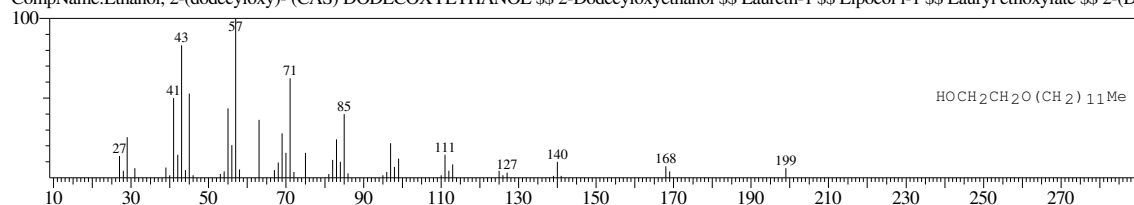

Hit#:2 Entry:197671 Library:WILEY7.LIB

SI:84 Formula:C18 H38 O2 CAS:2136-71-2 MolWeight:286 RetIndex:0

CompName:Ethanol, 2-(hexadecyloxy)- (CAS) 2-Hexadecyloxyethanol \$\$ 2-Hexadecyloxyethanol \$\$ 2-HEXADECYLOXY-ETHANOL \$\$ Ethylene glycol

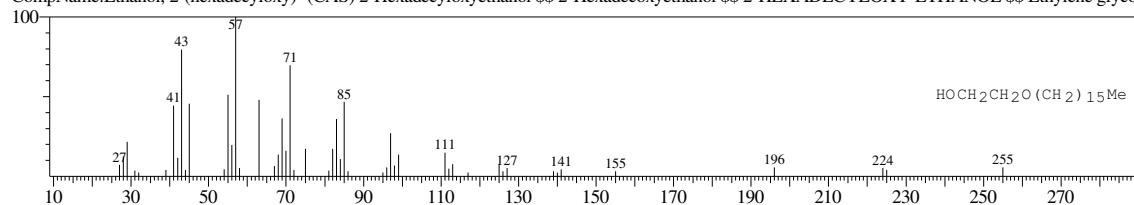

Hit#:3 Entry:224898 Library:WILEY7.LIB

SI:84 Formula:C20 H42 O2 CAS:2136-72-3 MolWeight:314 RetIndex:0

CompName:Ethanol, 2-(octadecyloxy)- (CAS) 2-OCTADECYLOXY ETHANOL \$\$ 2-Octadecyloxyethanol \$\$ 2-Octadecyloxyethanol \$\$ Ethylene glycol n

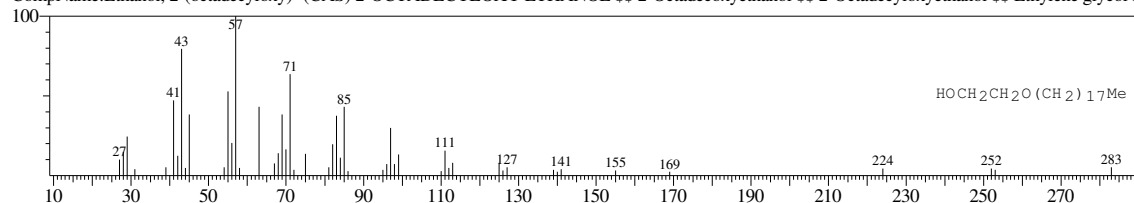

Hit#:4 Entry:133271 Library:WILEY7.LIB

SI:84 Formula:C14 H30 O2 CAS:29718-44-3 MolWeight:230 RetIndex:0

CompName:1-Dodecanol, ethoxy- \$\$

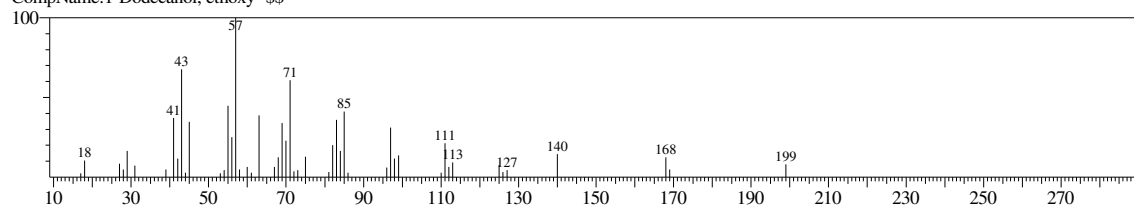

Hit#:5 Entry:133807 Library:WILEY7.LIB

SI:84 Formula:C14 H30 O2 CAS:4536-30-5 MolWeight:230 RetIndex:0

CompName:Ethanol, 2-(dodecyloxy)- (CAS) DODECOXYETHANOL \$\$ 2-Dodecyloxyethanol \$\$ Laureth-1 \$\$ Lipocol 1-1 \$\$ Lauryl ethoxylate \$\$ 2-(Dc

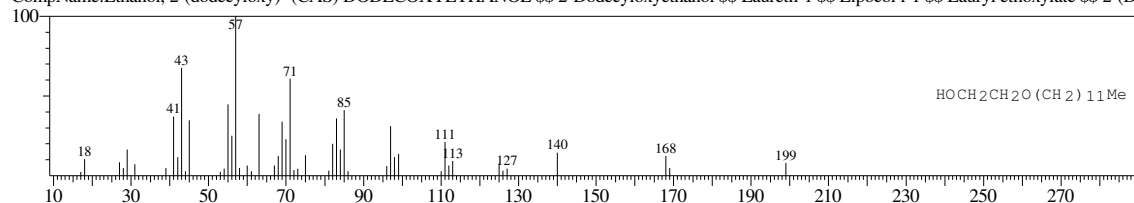

<< Target >>

Line#:25 R.Time:32.970(Scan#:3198) MassPeaks:5

RawMode:Averaged 32.960-32.980(3197-3199) BasePeak:105.00(1843)

BG Mode:Calc. from Peak Group 1 - Event 1

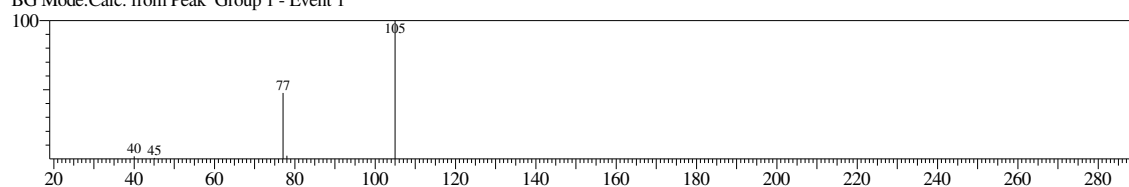

Hit#:1 Entry:89418 Library:WILEY7.LIB

SI:98 Formula:C8 H8 N2 O4 CAS:92844-59-2 MolWeight:196 RetIndex:0

CompName:N-Methyl-N-nitro-O-benzoylhydroxylamine \$\$

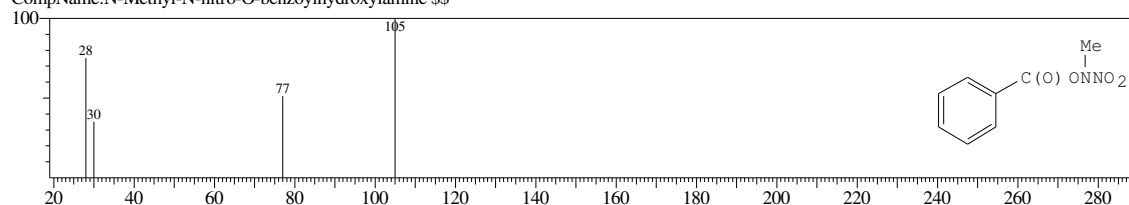

Hit#:2 Entry:79732 Library:WILEY7.LIB

SI:97 Formula:C12 H13 N O CAS:0-00-0 MolWeight:187 RetIndex:0

CompName:N-(1-Bicyclo[1.1.1]pentyl)benzamide \$\$

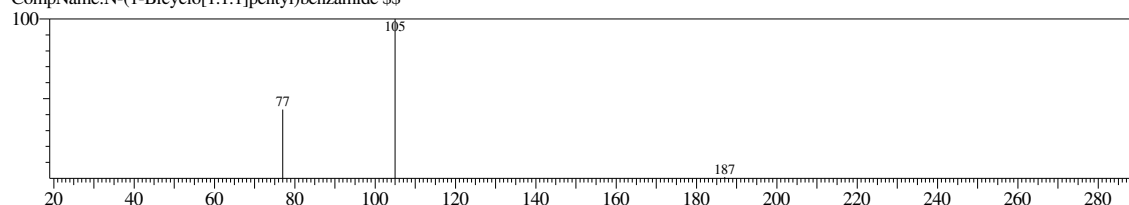

Hit#:3 Entry:270337 Library:WILEY7.LIB

SI:97 Formula:C24 H22 O4 CAS:0-00-0 MolWeight:374 RetIndex:0

CompName:3,3'-Dibenzoyloxy[2]Staffane \$\$

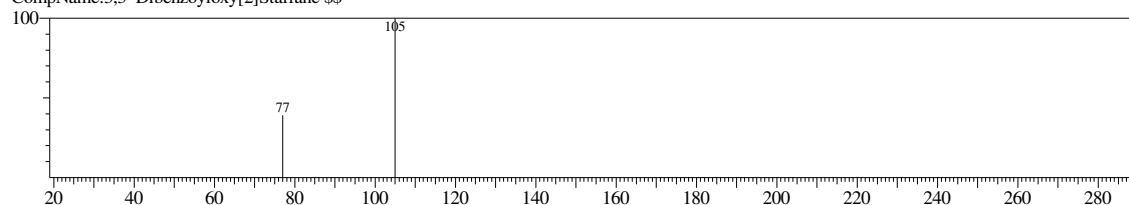

Hit#:4 Entry:49156 Library:WILEY7.LIB

SI:97 Formula:C11 H12 O CAS:0-00-0 MolWeight:160 RetIndex:0

CompName:1-Phenylpent-4-en-1-one \$\$

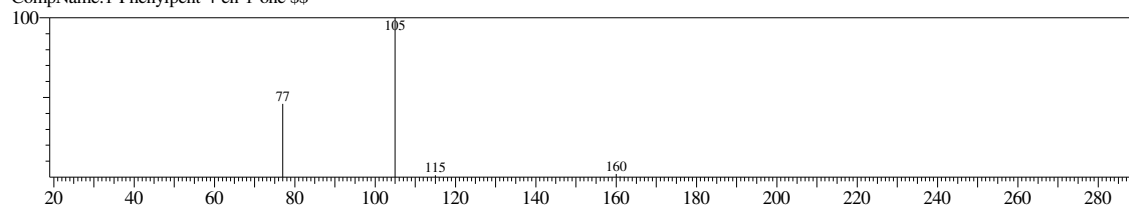

Hit#:5 Entry:311970 Library:WILEY7.LIB

SI:97 Formula:C22 H21 F3 N4 O5 CAS:0-00-0 MolWeight:478 RetIndex:0

CompName:2-(3-(Benzoylmethyl)bicyclo[1.1.1]pent-1-yl)-1,1,1-trifluoro-2-propanol \$\$

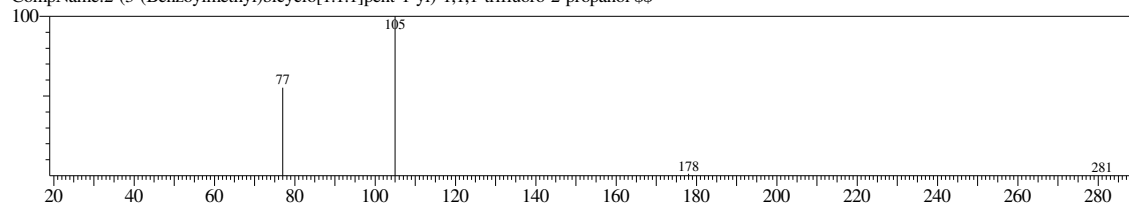

<< Target >>

Line#:26 R.Time:33.220(Scan#:3223) MassPeaks:13

RawMode:Averaged 33.210-33.230(3222-3224) BasePeak:83.10(1222)

BG Mode:Calc. from Peak Group 1 - Event 1

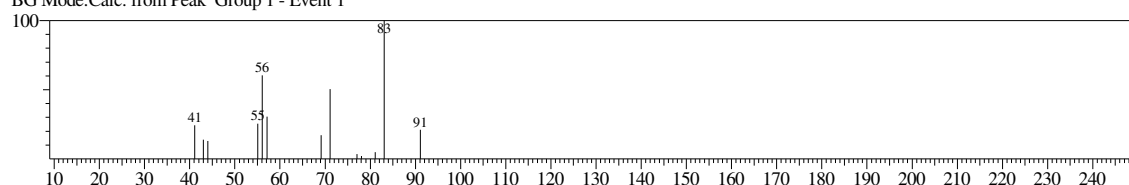

Hit#:1 Entry:2532 Library:WILEY7.LIB

SI:77 Formula:C3 H5 N3 CAS:6086-21-1 MolWeight:83 RetIndex:0

CompName:1H-1,2,4-Triazole, 1-methyl- (CAS) 1-Methyl-1,2,4-triazole \$S 1-Methyl-1H-1,2,4-triazole (CAS)

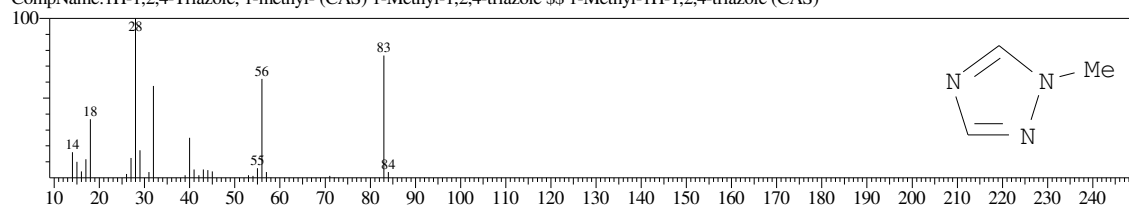

Hit#:2 Entry:58913 Library:WILEY7.LIB

SI:77 Formula:C12 H24 CAS:74421-03-7 MolWeight:168 RetIndex:0

CompName:2-Decene, 2,4-dimethyl- (CAS)

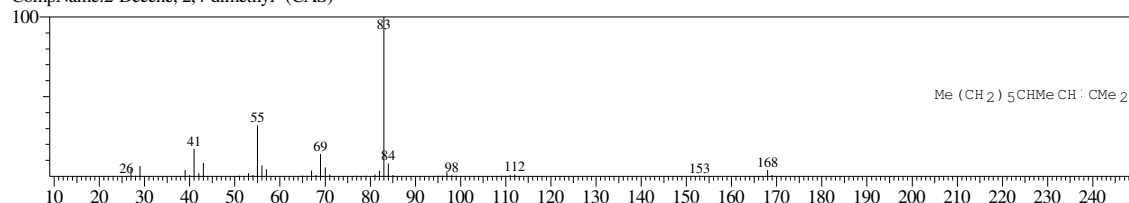

Hit#:3 Entry:58914 Library:WILEY7.LIB

SI:76 Formula:C12 H24 CAS:74421-03-7 MolWeight:168 RetIndex:0

CompName:2-Decene, 2,4-dimethyl- (CAS)

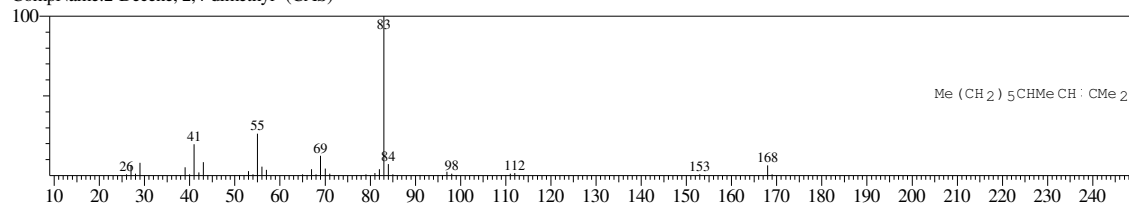

Hit#:4 Entry:43200 Library:WILEY7.LIB

SI:76 Formula:C11 H22 CAS:74421-06-0 MolWeight:154 RetIndex:0

CompName:2-Heptene, 5-ethyl-2,4-dimethyl- (CAS)

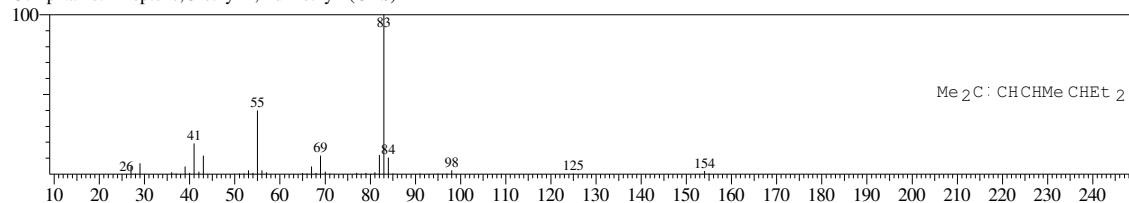

Hit#:5 Entry:144789 Library:WILEY7.LIB

SI:75 Formula:C10 H19 CL2 P CAS:83021-21-0 MolWeight:240 RetIndex:0

CompName:PHOSPHAN, DICHLORO-D-MENTHYL- \$S Phosphonous dichloride, [5-methyl-2-(1-methylethyl)cyclohexyl]-, [1R-(1.alpha.,2.beta.,5.alpha.

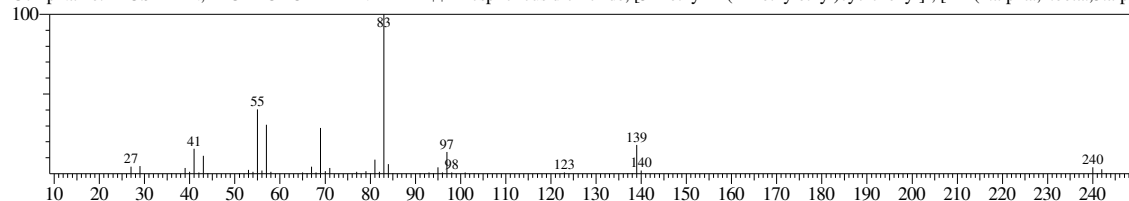

<< Target >>

Line#:27 R.Time:33.440(Scan#:3245) MassPeaks:12

RawMode:Averaged 33.430-33.450(3244-3246) BasePeak:100.05(8394)

BG Mode:Calc. from Peak Group 1 - Event 1

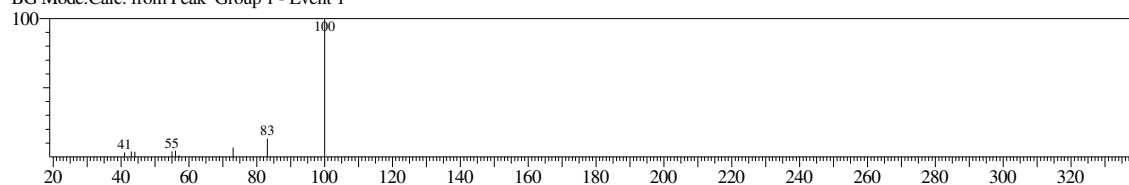

Hit#:1 Entry:6605 Library:WILEY7.LIB

SI:86 Formula:C6 H12 O CAS:53177-37-0 MolWeight:100 RetIndex:0

CompName:4-methylpent-3-en-2-ol \$\$ 3-Penten-2-ol, 4-methyl-, (+,-)- (CAS)

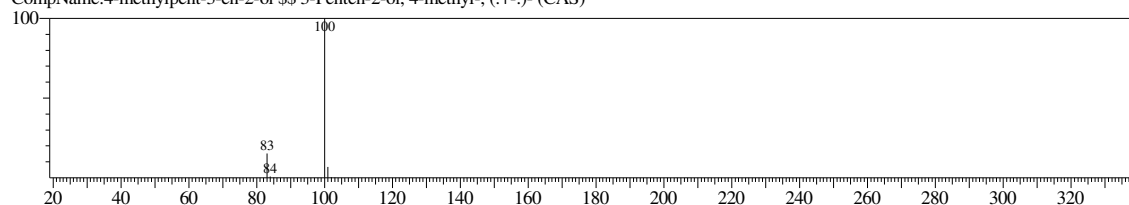

Hit#:2 Entry:245978 Library:WILEY7.LIB

SI:85 Formula:C22 H45 N O CAS:16528-77-1 MolWeight:339 RetIndex:0

CompName:MORPHOLINE, 4-OCTADECYL- \$\$

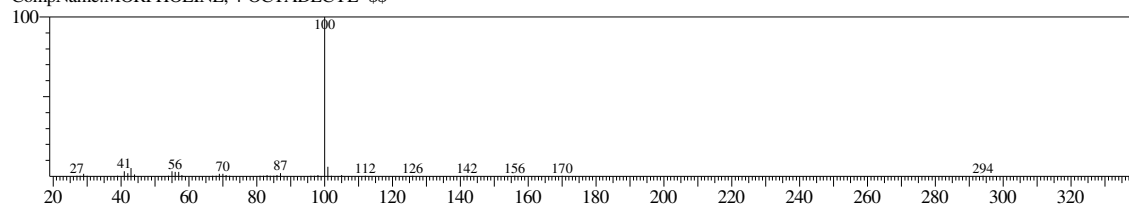

Hit#:3 Entry:238100 Library:WILEY7.LIB

SI:85 Formula:C12 H15 BR N2 O4 CAS:56759-43-4 MolWeight:330 RetIndex:0

CompName:1-(4'-Bromo-3'-nitrophenyl)-2-morpholinoethanol Hydrochloride \$\$ 4-Morpholineethanol, .alpha.-(4-bromo-3-nitrophenyl)-, monohydrochloric

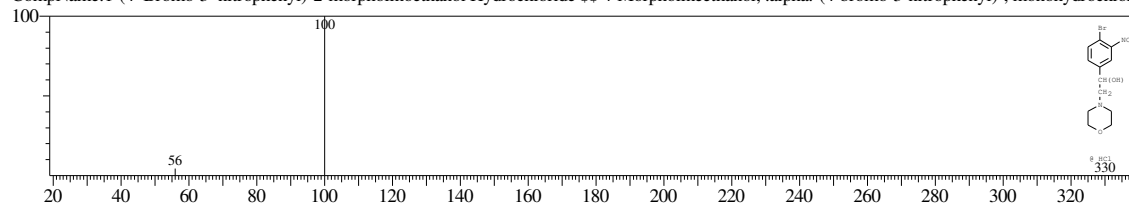

Hit#:4 Entry:264548 Library:WILEY7.LIB

SI:85 Formula:C12 H16 BR CL N2 O4 CAS:0-00-0 MolWeight:366 RetIndex:0

CompName:1-(4'-BROMO-3'-NITROPHENYL)-2-MORPHOLINOETHANOL HYDROCHLORIDE \$\$

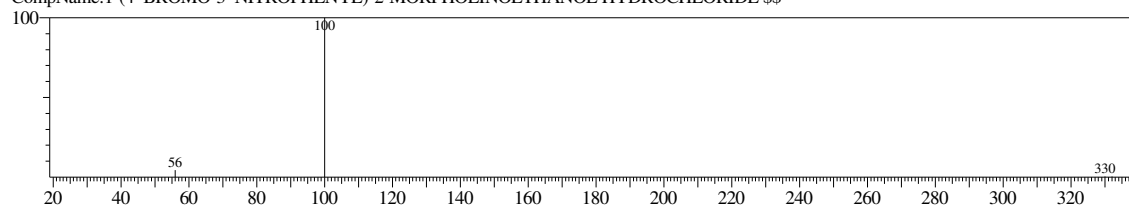

Hit#:5 Entry:238101 Library:WILEY7.LIB

SI:84 Formula:C12 H15 BR N2 O4 CAS:56759-50-3 MolWeight:330 RetIndex:0

CompName:1-(5'-Bromo-2'-nitrophenyl)-2-morpholinoethanol Hydrochloride \$\$ 4-Morpholineethanol, .alpha.-(5-bromo-2-nitrophenyl)-, monohydrochloric

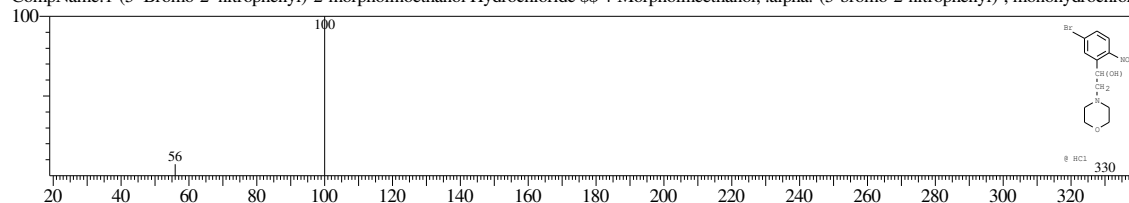

<< Target >>

Line#:28 R.Time:33.700(Scan#:3271) MassPeaks:18

RawMode:Averaged 33.690-33.710(3270-3272) BasePeak:58.05(3879)

BG Mode:Calc. from Peak Group 1 - Event 1

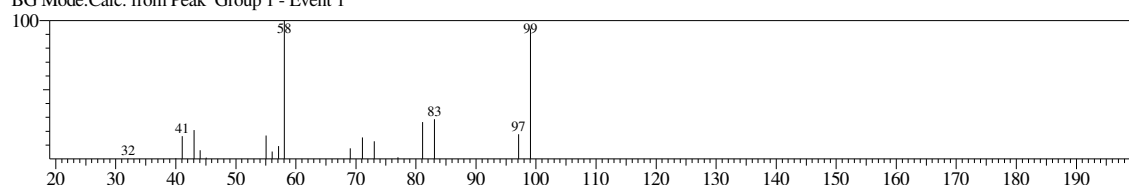

Hit#:1 Entry:94071 Library:WILEY7.LIB

SI:75 Formula:C11 H21 N O2 CAS:0-00-0 MolWeight:199 RetIndex:0

CompName:1-HYDROXY-CYCLOHEXANECARBOXYLIC ACID TERT-BUTYL-AMIDE \$\$

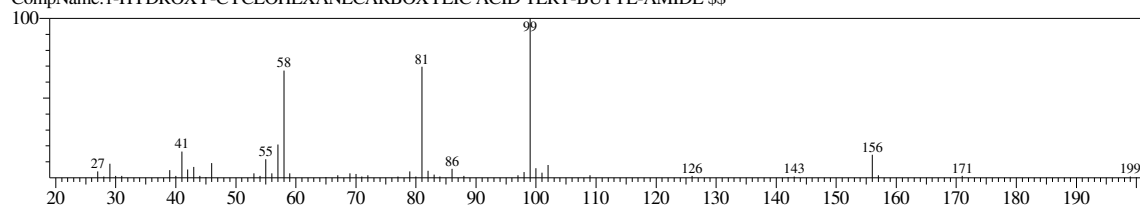

Hit#:2 Entry:77002 Library:WILEY7.LIB

SI:75 Formula:C12 H24 O CAS:110-41-8 MolWeight:184 RetIndex:0

CompName:Undecanal, 2-methyl- (CAS) 2-Methylundecanal \$\$ Aldehyde M.N.A. \$\$ 2-Methyl-1-undecanal \$\$ Methylnonylacetaldehyde \$\$ Methyl n-non

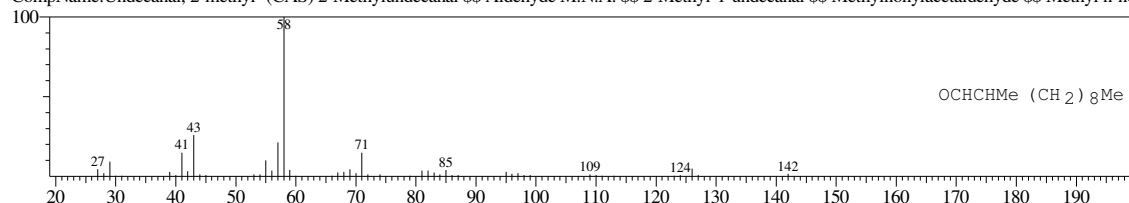

Hit#:3 Entry:77001 Library:WILEY7.LIB

SI:74 Formula:C12 H24 O CAS:110-41-8 MolWeight:184 RetIndex:0

CompName:Undecanal, 2-methyl- (CAS) 2-Methylundecanal \$\$ Aldehyde M.N.A. \$\$ 2-Methyl-1-undecanal \$\$ Methylnonylacetaldehyde \$\$ Methyl n-non

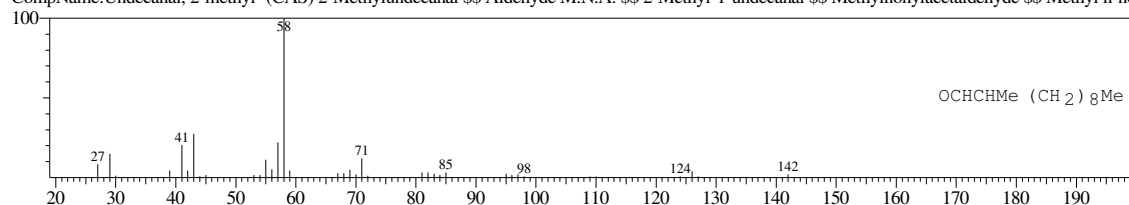

Hit#:4 Entry:6338 Library:WILEY7.LIB

SI:74 Formula:C4 H5 N S CAS:3581-87-1 MolWeight:99 RetIndex:0

CompName:2-Methylthiazole \$\$

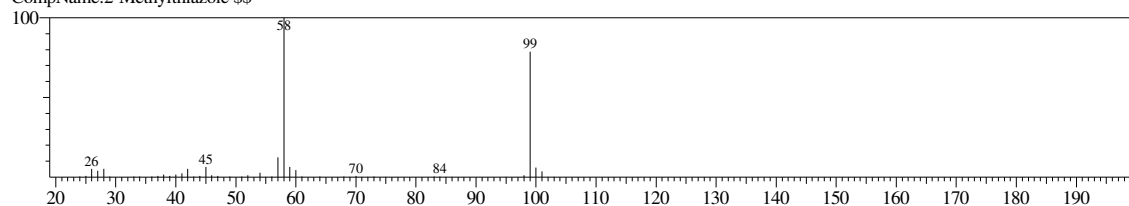

Hit#:5 Entry:76314 Library:WILEY7.LIB

SI:74 Formula:C12 H24 O CAS:0-00-0 MolWeight:184 RetIndex:0

CompName:2-methyl undecanal \$\$

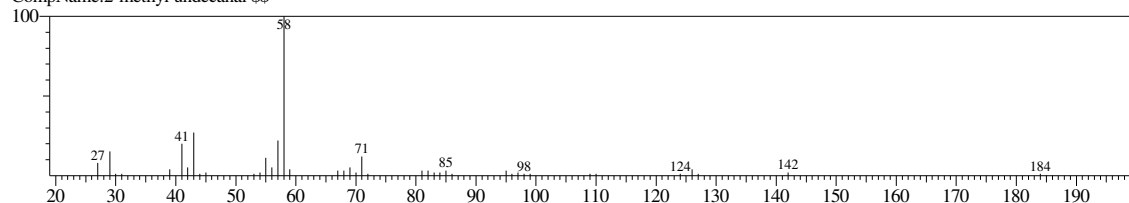

<< Target >>

Line#:29 R.Time:33.920(Scan#:3293) MassPeaks:23

RawMode:Averaged 33.910-33.930(3292-3294) BasePeak:74.05(8486)

BG Mode:Calc. from Peak Group 1 - Event 1

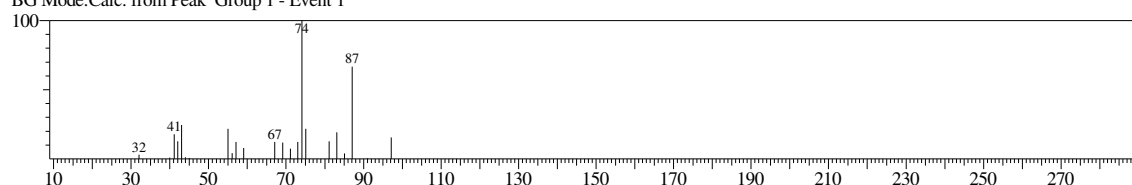

Hit#:1 Entry:195592 Library:WILEY7.LIB

SI:86 Formula:C18 H36 O2 CAS:1731-92-6 MolWeight:284 RetIndex:0

CompName:Heptadecanoic acid, methyl ester (CAS) Methyl heptadecanoate \$\$ Methyl margarate \$\$ Margaric acid methyl ester \$\$ n-Heptadecanoic acid n

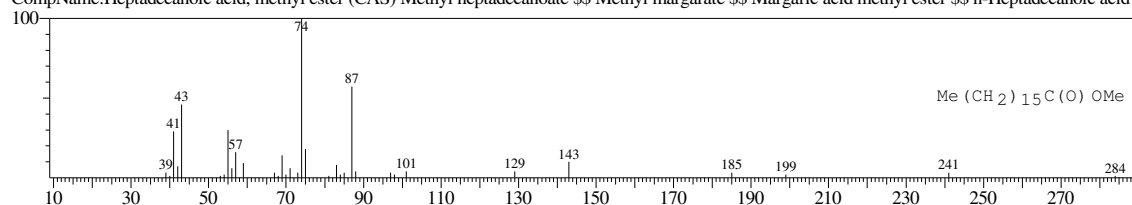

Hit#:2 Entry:180455 Library:WILEY7.LIB

SI:86 Formula:C17 H34 O2 CAS:112-39-0 MolWeight:270 RetIndex:0

CompName:Hexadecanoic acid, methyl ester (CAS) Methyl palmitate \$\$ Methyl hexadecanoate \$\$ Methyl n-hexadecanoate \$\$ Uniphat A60 \$\$ Metholene

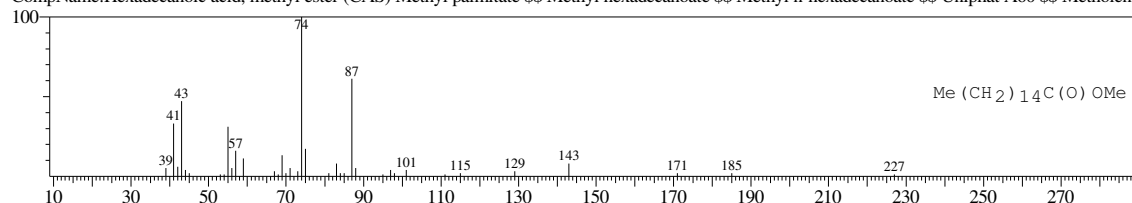

Hit#:3 Entry:195602 Library:WILEY7.LIB

SI:85 Formula:C18 H36 O2 CAS:6929-04-0 MolWeight:284 RetIndex:0

CompName:Hexadecanoic acid, 15-methyl-, methyl ester (CAS) METHYL-15-METHYL HEXADECANOATE \$\$ Methyl isoheptadecanoate \$\$ Methyl 1

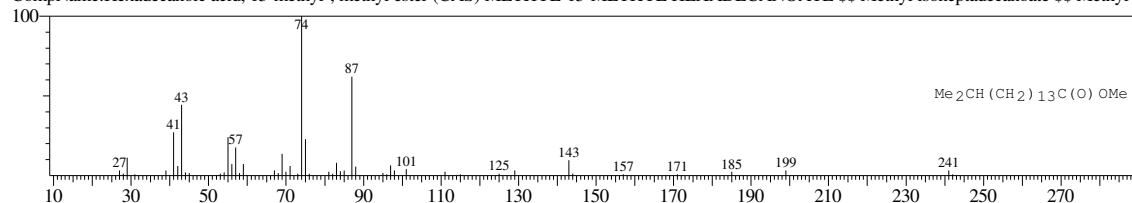

Hit#:4 Entry:131462 Library:WILEY7.LIB

SI:85 Formula:C14 H28 O2 CAS:1731-88-0 MolWeight:228 RetIndex:0

CompName:Tridecanoic acid, methyl ester (CAS) Methyl tridecanoate \$\$ METHYL N-TRIDECANOATE \$\$ Tridecanoic acid methyl ester \$\$ Methyl est

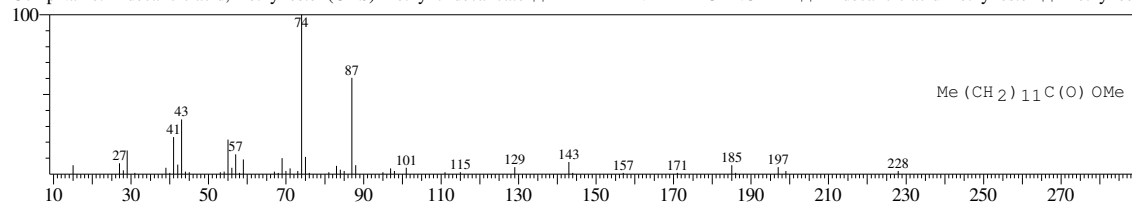

Hit#:5 Entry:164481 Library:WILEY7.LIB

SI:85 Formula:C16 H32 O2 CAS:7132-64-1 MolWeight:256 RetIndex:0

CompName:Pentadecanoic acid, methyl ester (CAS) Methyl pentadecanoate \$\$ PENTADECANOIC ACID-METHYL ESTER \$\$ Methyl n-pentadecanoate

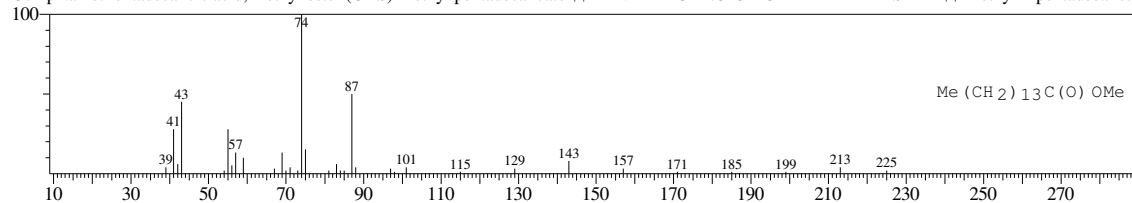

<< Target >>

Line#:30 R.Time:34.940(Scan#:3395) MassPeaks:10

RawMode:Averaged 34.930-34.950(3394-3396) BasePeak:32.05(464)

BG Mode:Calc. from Peak Group 1 - Event 1

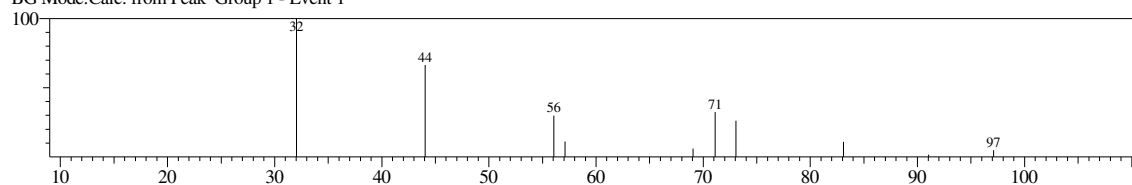

Hit#:1 Entry:48929 Library:WILEY7.LIB

SI:75 Formula:C9 H17 F O CAS:88995-87-3 MolWeight:160 RetIndex:0

CompName:1-Fluoro-2,2,4,4-tetramethyl-3-pentanone \$\$

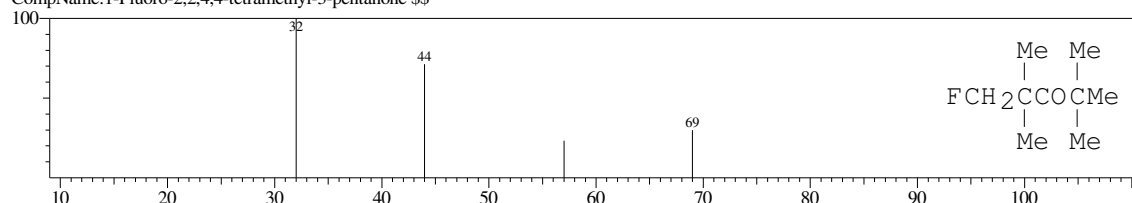

Hit#:2 Entry:8171 Library:WILEY7.LIB

SI:72 Formula:C4 H9 N O2 CAS:105-40-8 MolWeight:103 RetIndex:0

CompName:ethyl N-methylcarbamate \$\$ Carbamic acid, methyl-, ethyl ester \$\$ Ethyl methylcarbamate \$\$ Methylurethane \$\$ N-Methylurethan \$\$ N-methylurethane

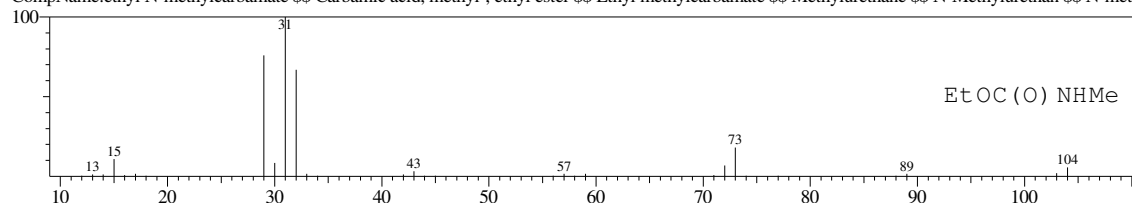

Hit#:3 Entry:8344 Library:WILEY7.LIB

SI:68 Formula:C3 H8 N2 O2 CAS:24535-11-3 MolWeight:104 RetIndex:0

CompName:N-amino-3-hydroxypropanamide \$\$ Propanoic acid, 3-hydroxy-, hydrazide (CAS) Hydracrylic acid, hydrazide (CAS) 3-Hydroxypropionic acid hydrazide

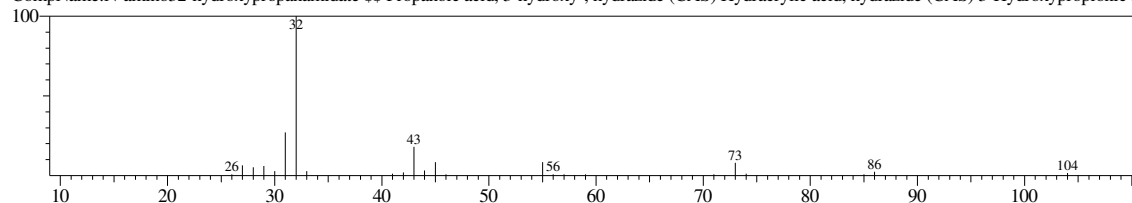

Hit#:4 Entry:8187 Library:WILEY7.LIB

SI:67 Formula:C4 H13 N3 CAS:111-40-0 MolWeight:103 RetIndex:0

CompName:1,2-Ethanediamine, N-(2-aminoethyl)- (CAS) Diethylenetriamine \$\$ Barsamide 115 \$\$ 1,4,7-Triazaheptane \$\$ Bis(2-aminoethyl)amine \$\$ 2,2'-bis(2-aminoethyl)propane-1,1'-diol

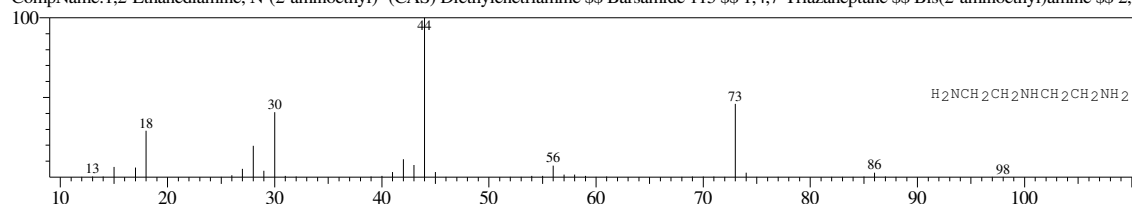

Hit#:5 Entry:3810 Library:WILEY7.LIB

SI:67 Formula:C4 H12 N2 CAS:0-00-0 MolWeight:88 RetIndex:0

CompName:1-Methylamino-propylamine \$\$

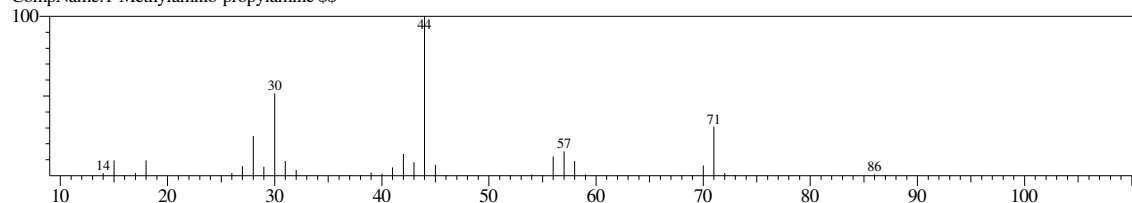



<< Target >>

Line#:31 R.Time:35.110(Scan#:3412) MassPeaks:18

RawMode:Averaged 35.100-35.120(3411-3413) BasePeak:88.05(1102)

BG Mode:Calc. from Peak Group 1 - Event 1

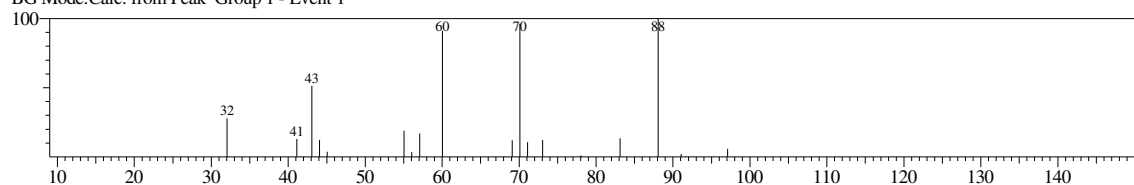

Hit#:1 Entry:3840 Library:WILEY7.LIB

SI:75 Formula:C<sub>2</sub>H<sub>4</sub>N<sub>2</sub>O<sub>2</sub> CAS:628-36-4 MolWeight:88 RetIndex:0

CompName:1,2-Hydrazinedicarboxaldehyde (CAS) 1,2-Diformylhydrazine \$\$ SYM-DIFORMYLHYDRAZINE \$\$ Bicarbaldehyde \$\$ Diformylhydrazine

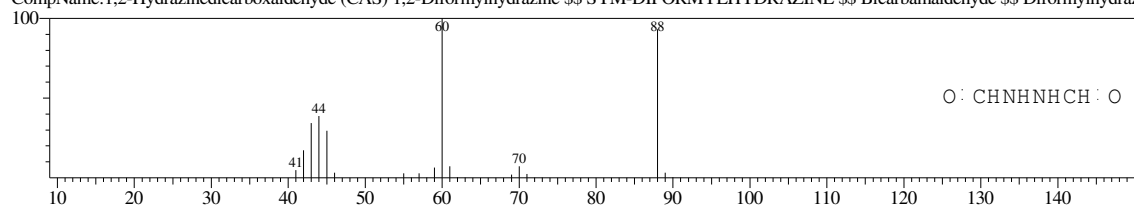

Hit#:2 Entry:32667 Library:WILEY7.LIB

SI:74 Formula:C<sub>8</sub>H<sub>16</sub>O<sub>2</sub> CAS:5870-68-8 MolWeight:144 RetIndex:0

CompName:Valeric acid, 3-methyl-, ethyl ester (CAS) Ethyl 3-methylpentanoate \$\$ Ethyl 3-methylpentanoate \$\$ Valeric acid, 3-methyl-, ethyl ester \$\$

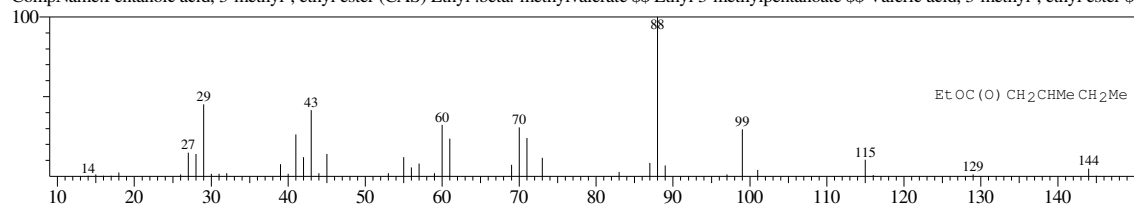

Hit#:3 Entry:193085 Library:WILEY7.LIB

SI:74 Formula:C<sub>19</sub>H<sub>37</sub>D O CAS:41563-28-4 MolWeight:282 RetIndex:0

CompName:2-D-2-PENTADECYL-1,3-DIOXANE \$\$

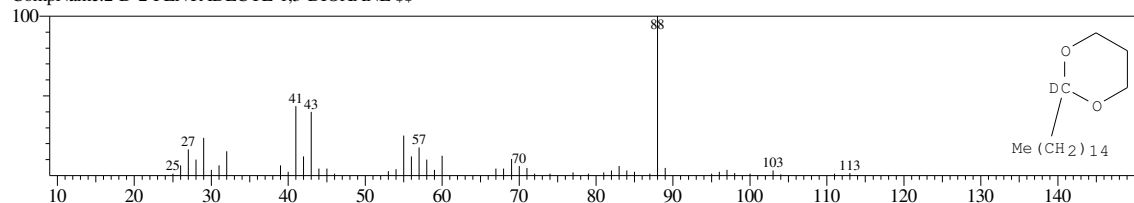

Hit#:4 Entry:22522 Library:WILEY7.LIB

SI:73 Formula:C<sub>5</sub>H<sub>8</sub>O<sub>4</sub> CAS:78512-75-1 MolWeight:132 RetIndex:0

CompName:5-Desoxy-L-lyxonolactone \$\$ L-Lyxonic acid, 5-deoxy-, .gamma.-lactone (CAS)

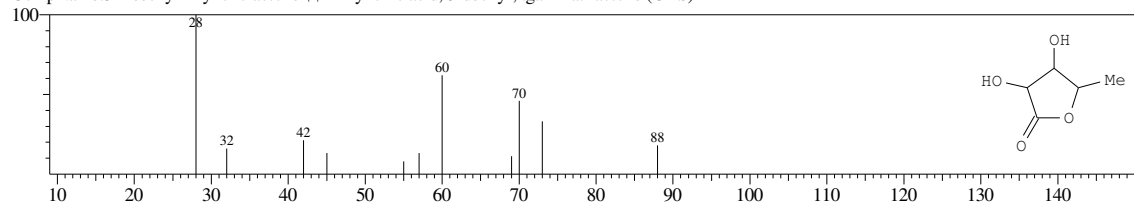

Hit#:5 Entry:23460 Library:WILEY7.LIB

SI:73 Formula:C<sub>4</sub>H<sub>7</sub>N O<sub>4</sub> CAS:56-84-8 MolWeight:133 RetIndex:0

CompName:L-Aspartic acid (CAS) Aspartic acid \$\$ L-Asparagic acid \$\$ (S)-Aspartic acid \$\$ Aspartic acid, L- \$\$ L-Asparaginic acid \$\$ (2S)-Aspartic acid

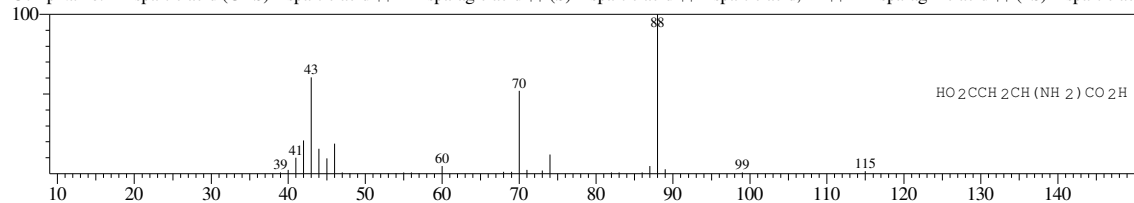

<< Target >>

Line#:32 R.Time:35.590(Scan#:3460) MassPeaks:36

RawMode:Averaged 35.580-35.600(3459-3461) BasePeak:73.05(7218)

BG Mode:Calc. from Peak Group 1 - Event 1

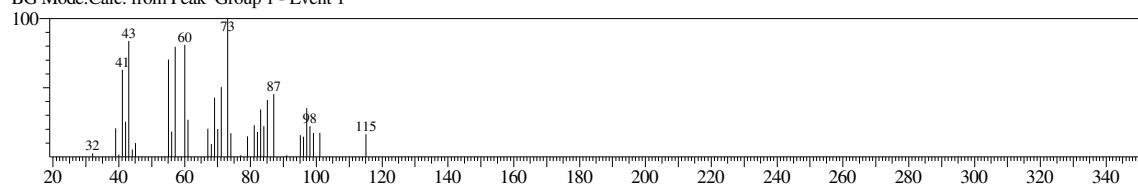

Hit#:1 Entry:193348 Library:WILEY7.LIB

SI:88 Formula:C18 H34 O2 CAS:112-80-1 MolWeight:282 RetIndex:0

CompName:9-Octadecenoic acid (Z)- (CAS) Oleic acid \$\$ Red oil \$\$ Oelsauere \$\$ Oleine 7503 \$\$ Pamolyn 100 \$\$ Emersol 211 \$\$ Vopcolene 27 \$\$ cis-C

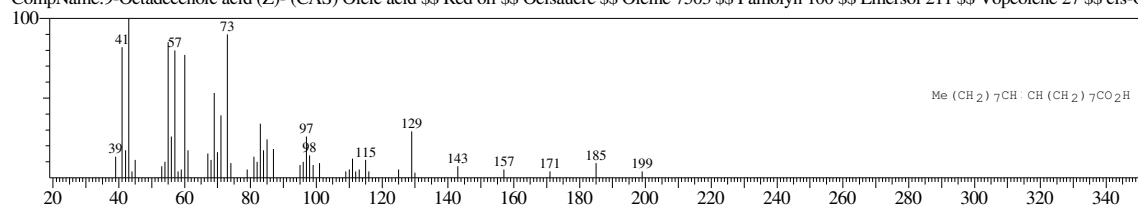

Hit#:2 Entry:195573 Library:WILEY7.LIB

SI:87 Formula:C18 H36 O2 CAS:57-11-4 MolWeight:284 RetIndex:0

CompName:Octadecanoic acid (CAS) Stearic acid \$\$ n-Octadecanoic acid \$\$ PD 185 \$\$ NAA 173 \$\$ Vanicol \$\$ Kam 3000 \$\$ Kam 1000 \$\$ Kam 2000 \$\$

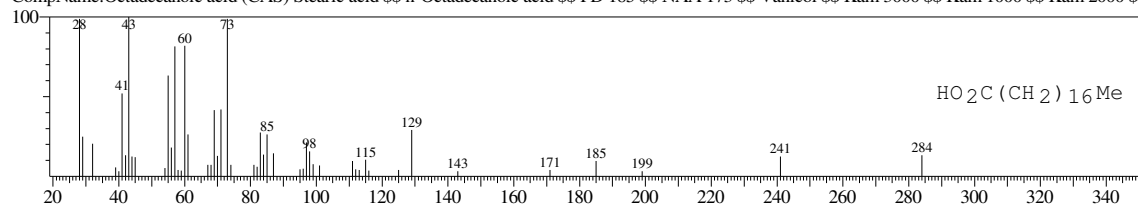

Hit#:3 Entry:148359 Library:WILEY7.LIB

SI:86 Formula:C15 H30 O2 CAS:1002-84-2 MolWeight:242 RetIndex:0

CompName:Pentadecanoic acid (CAS) Pentadecylic acid \$\$ n-Pentadecanoic acid \$\$ n-Pentadecylic acid \$\$ Pentadecylic acid \$\$ PENTADECANSAEUR

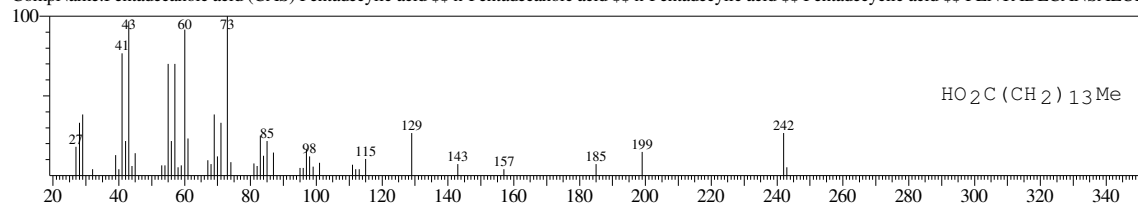

Hit#:4 Entry:247102 Library:WILEY7.LIB

SI:85 Formula:C22 H44 O2 CAS:112-85-6 MolWeight:340 RetIndex:0

CompName:Docosanoic acid (CAS) Behenic acid \$\$ Glycon B-70 \$\$ Hydrofol 2022-55 \$\$ Hydrofol Acid 560 \$\$ n-Docosanoic acid \$\$ 1-Docosanoic acid

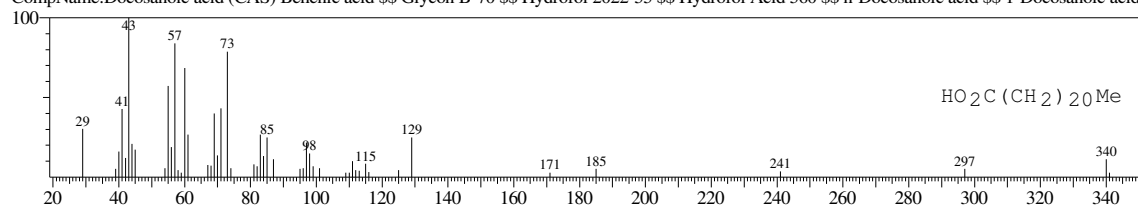

Hit#:5 Entry:217709 Library:WILEY7.LIB

SI:85 Formula:C12 H24 Ag O2 CAS:18268-45-6 MolWeight:307 RetIndex:0

CompName:Dodecanoic acid, silver(1+) salt (CAS) Silver laurate \$\$ Lauric acid, silver(1+) salt \$\$

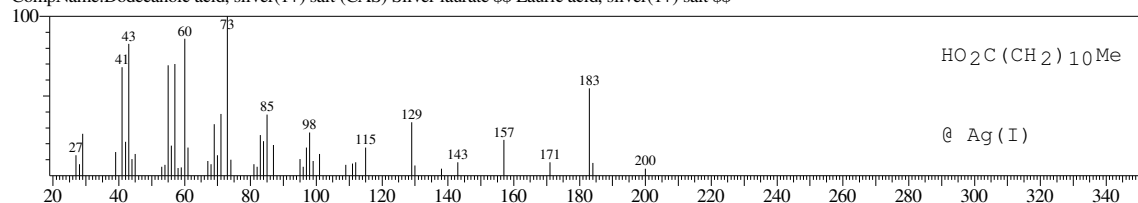

<< Target >>

Line#:33 R.Time:36.310(Scan#:3532) MassPeaks:29

RawMode:Averaged 36.300-36.320(3531-3533) BasePeak:45.05(4838)

BG Mode:Calc. from Peak Group 1 - Event 1

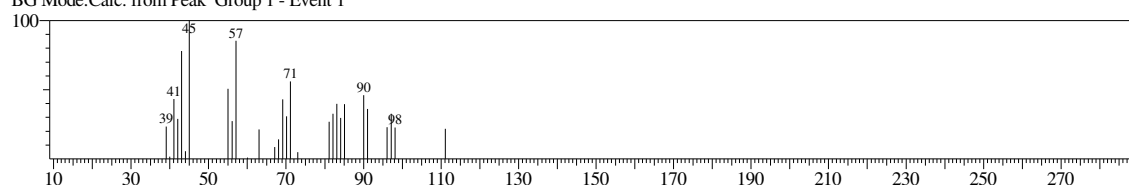

Hit#:1 Entry:166691 Library:WILEY7.LIB

SI:81 Formula:C16 H34 O2 CAS:2136-70-1 MolWeight:258 RetIndex:0

CompName:Ethanol, 2-(tetradecyloxy)- (CAS) 2-Tetradecyloxyethanol \$\$ Myristyl monoethoxylate \$\$ Ethylene glycol monotetradecyl ether \$\$

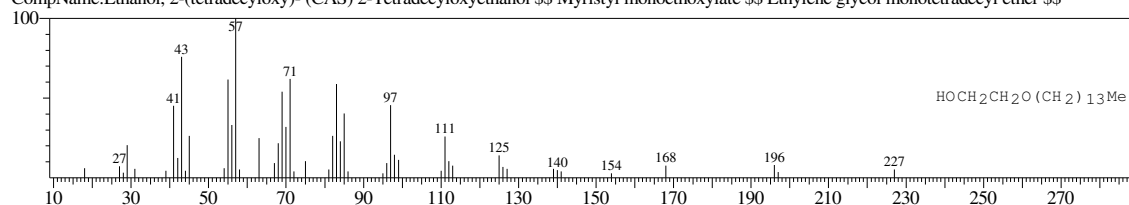

Hit#:2 Entry:224898 Library:WILEY7.LIB

SI:81 Formula:C20 H42 O2 CAS:2136-72-3 MolWeight:314 RetIndex:0

CompName:Ethanol, 2-(octadecyloxy)- (CAS) 2-OCTADECYLOXY ETHANOL \$\$ 2-Octadecoxyethanol \$\$ 2-Octadecyloxyethanol \$\$ Ethylene glycol n

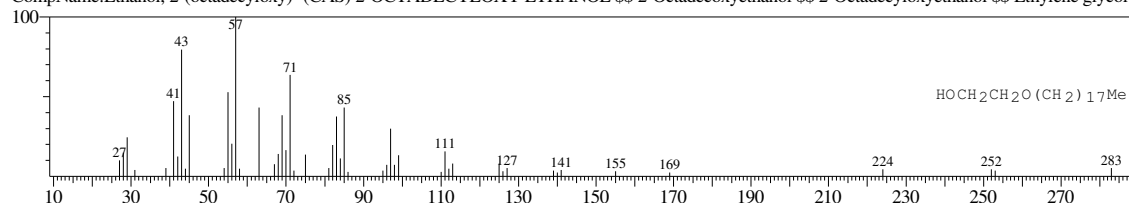

Hit#:3 Entry:133807 Library:WILEY7.LIB

SI:81 Formula:C14 H30 O2 CAS:4536-30-5 MolWeight:230 RetIndex:0

CompName:Ethanol, 2-(dodecyloxy)- (CAS) DODECOXYETHANOL \$\$ 2-Dodecyloxyethanol \$\$ Laureth-1 \$\$ Lipocol I-1 \$\$ Lauryl ethoxylate \$\$ 2-(Dc

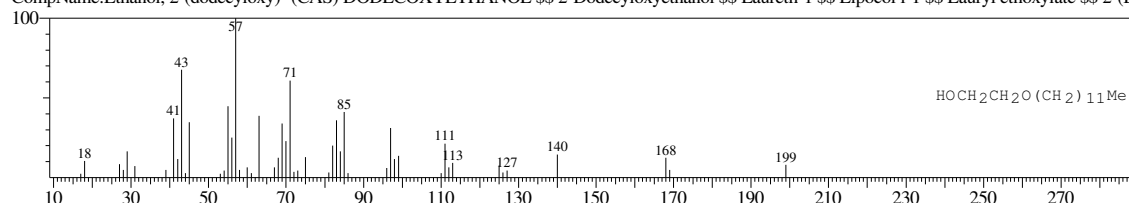

Hit#:4 Entry:133271 Library:WILEY7.LIB

SI:81 Formula:C14 H30 O2 CAS:29718-44-3 MolWeight:230 RetIndex:0

CompName:1-Dodecanol, ethoxy- \$\$

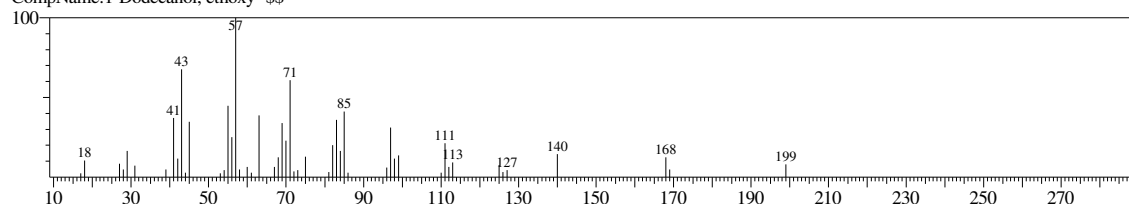

Hit#:5 Entry:197671 Library:WILEY7.LIB

SI:81 Formula:C18 H38 O2 CAS:2136-71-2 MolWeight:286 RetIndex:0

CompName:Ethanol, 2-(hexadecyloxy)- (CAS) 2-Hexadecoxyethanol \$\$ 2-HEXADECYLOXY-ETHANOL \$\$ Ethylene glycol

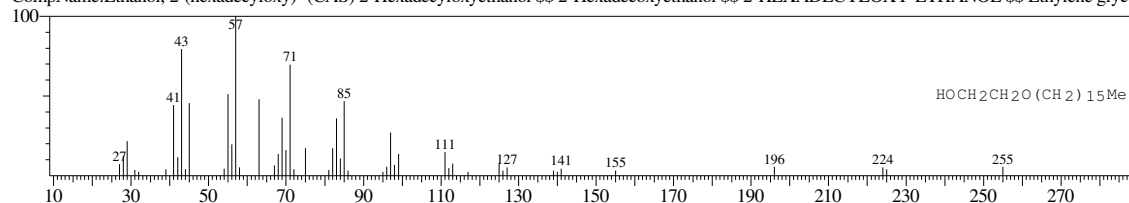

<< Target >>

Line#:34 R.Time:36.880(Scan#:3589) MassPeaks:22

RawMode:Averaged 36.870-36.890(3588-3590) BasePeak:55.05(1348)

BG Mode:Calc. from Peak Group 1 - Event 1

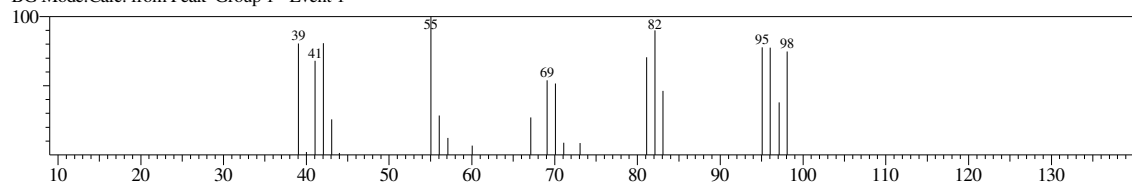

Hit#:1 Entry:28436 Library:WILEY7.LIB

SI:81 Formula:C8 H13 N O CAS:0-00-0 MolWeight:139 RetIndex:0

CompName:2-Cyano Methyl Cyclohexane \$\$

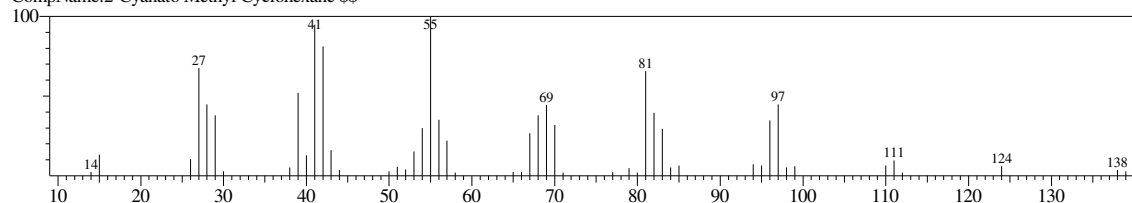

Hit#:2 Entry:18379 Library:WILEY7.LIB

SI:79 Formula:C8 H14 O CAS:13609-59-1 MolWeight:126 RetIndex:0

CompName:Cycloheptanone, 4-methyl-, (R)- (CAS) Cycloheptanone, 4-methyl-, (-)- \$\$

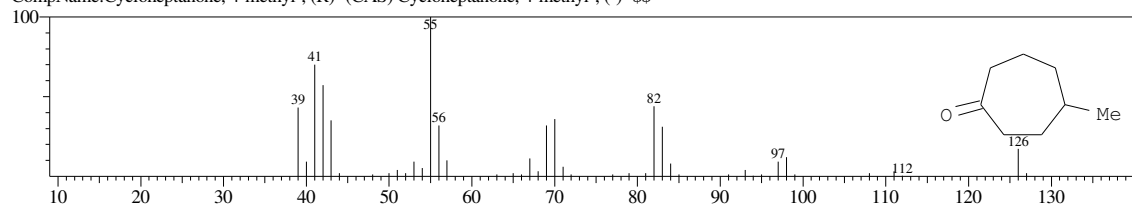

Hit#:3 Entry:31779 Library:WILEY7.LIB

SI:79 Formula:C9 H18 O CAS:1124-63-6 MolWeight:142 RetIndex:0

CompName:3-CYCLOHEXYL-PROPANOL \$\$ Cyclohexanepropanol (CAS) 3-Cyclohexyl-1-propanol \$\$ 3-Cyclohexylpropyl alcohol \$\$ Cyclohexaneproc

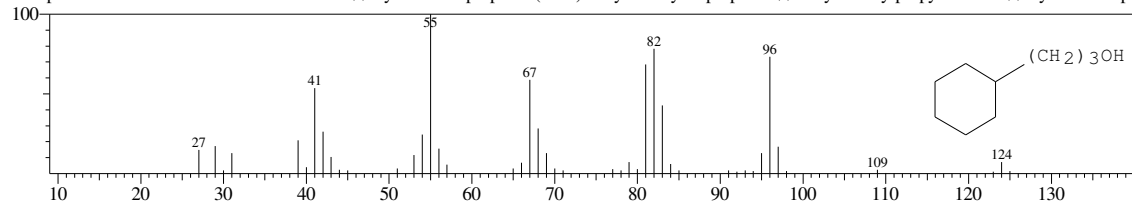

Hit#:4 Entry:133266 Library:WILEY7.LIB

SI:79 Formula:C14 H30 O2 CAS:19812-64-7 MolWeight:230 RetIndex:0

CompName:1,14-Tetradecanediol (CAS) tetra Decamethylene glycol \$\$

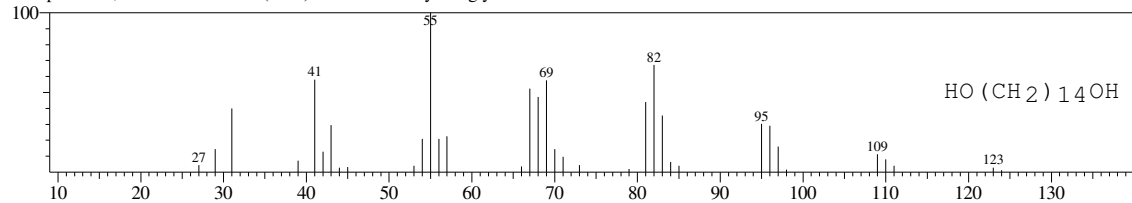

Hit#:5 Entry:18973 Library:WILEY7.LIB

SI:78 Formula:C8 H14 O CAS:502-49-8 MolWeight:126 RetIndex:0

CompName:Cyclooctanone (CAS)

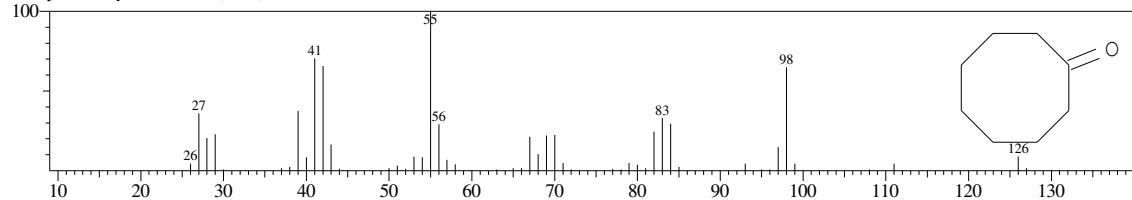

<< Target >>

Line#:35 R.Time:37.260(Scan#:3627) MassPeaks:12

RawMode:Averaged 37.250-37.270(3626-3628) BasePeak:85.10(1168)

BG Mode:Calc. from Peak Group 1 - Event 1

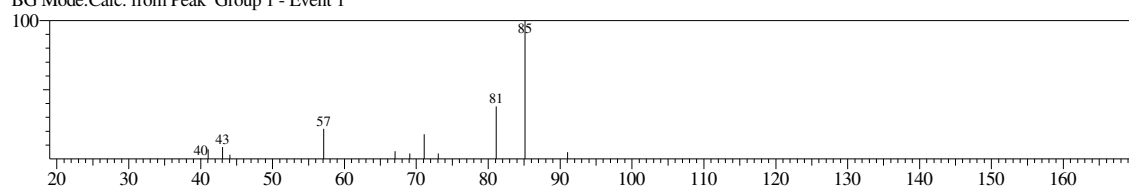

Hit#:1 Entry:21566 Library:WILEY7.LIB

SI:78 Formula:C5 H6 O4 CAS:4344-84-7 MolWeight:130 RetIndex:0

CompName:5-OXO-TETRAHYDRO-FURAN-2-CARBOXYLIC ACID \$\$

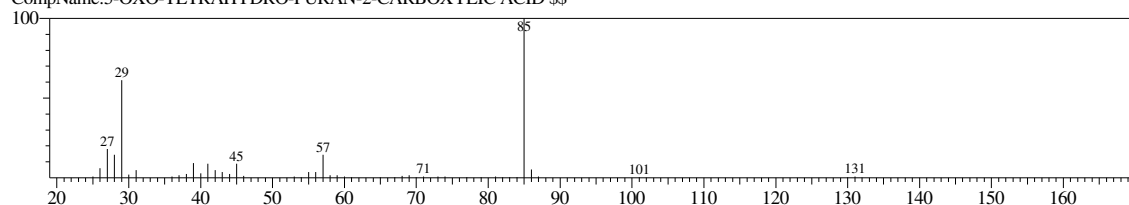

Hit#:2 Entry:167595 Library:WILEY7.LIB

SI:77 Formula:C11 H16 O7 CAS:0-00-0 MolWeight:260 RetIndex:0

CompName:

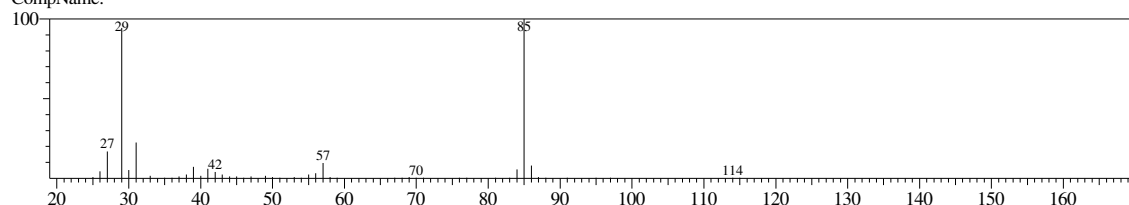

Hit#:3 Entry:160081 Library:WILEY7.LIB

SI:77 Formula:C15 H24 O3 CAS:0-00-0 MolWeight:252 RetIndex:0

CompName:10-(TETRAHYDRO-PYRAN-2-YLOXY)-TRICYCLO[4.2.1.1 2,5]DECAN-9-OL \$\$

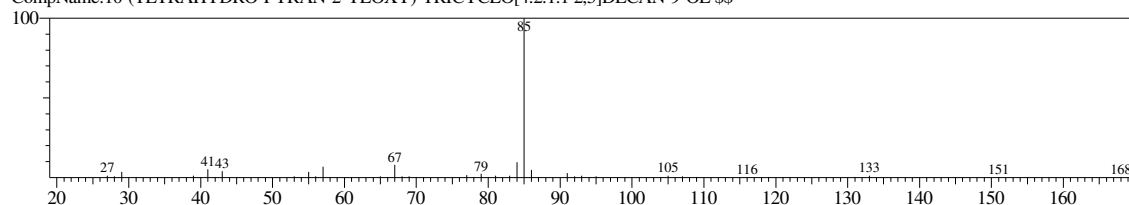

Hit#:4 Entry:20331 Library:WILEY7.LIB

SI:77 Formula:C7 H12 O2 CAS:105-21-5 MolWeight:128 RetIndex:0

CompName:2(3H)-Furanone, dihydro-5-propyl- (CAS) 5-N-PROPYL-.GAMMA.-BUTYROLACTONE \$\$ .gamma.-Heptalactone \$\$ .gamma.-Heptanolac

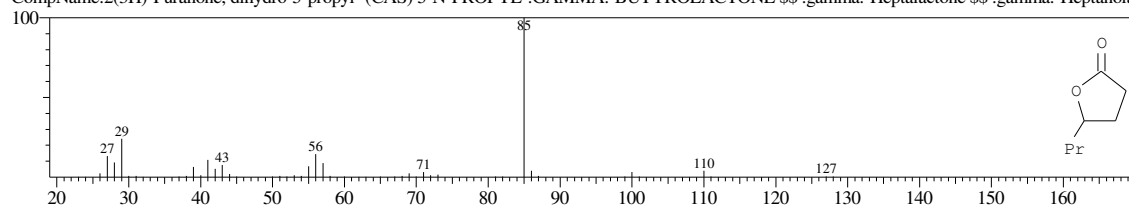

Hit#:5 Entry:87454 Library:WILEY7.LIB

SI:76 Formula:C12 H18 O2 CAS:0-00-0 MolWeight:194 RetIndex:0

CompName:2-exo-(1-oxacyclohex-2-yloxy)bicyclo[2.2.1]hepta-5-ene \$\$

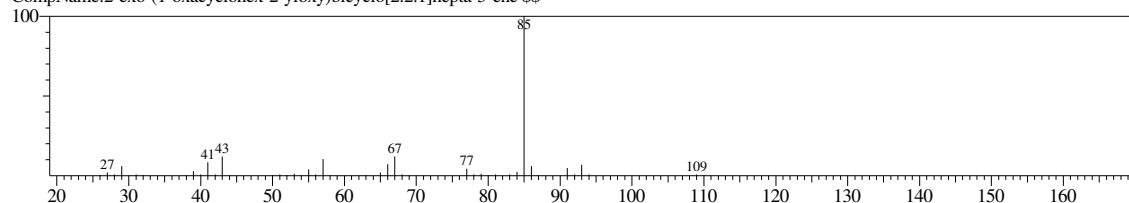

<< Target >>

Line#:36 R.Time:37.740(Scan#:3675) MassPeaks:11

RawMode:Averaged 37.730-37.750(3674-3676) BasePeak:81.10(655)

BG Mode:Calc. from Peak Group 1 - Event 1

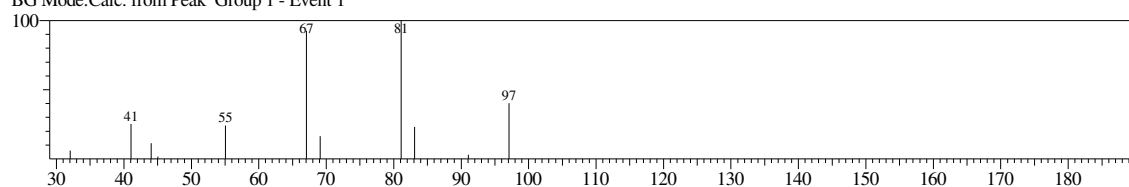

Hit#:1 Entry:78253 Library:WILEY7.LIB

SI:81 Formula:C10 H18 O3 CAS:118112-43-9 MolWeight:186 RetIndex:0

CompName:2,3,13-trioxabicyclo[8.2.1]tridecane \$\$ 11,12,13-Trioxabicyclo[8.2.1]tridecane (CAS)

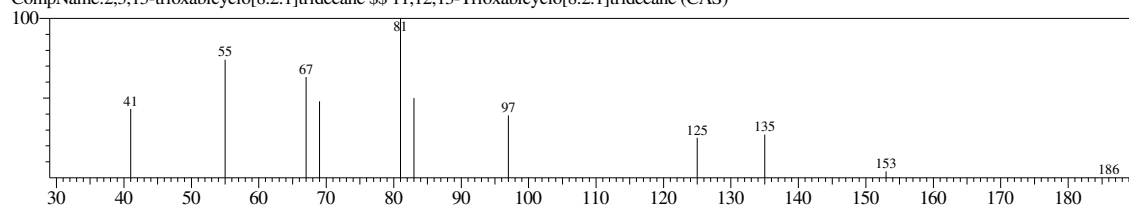

Hit#:2 Entry:55396 Library:WILEY7.LIB

SI:72 Formula:C10 H18 N2 CAS:132540-44-4 MolWeight:166 RetIndex:0

CompName:3,5-diethyl-3,5-dihydro-3,5-dimethyl-4-methylene-4H-pyrazole \$\$

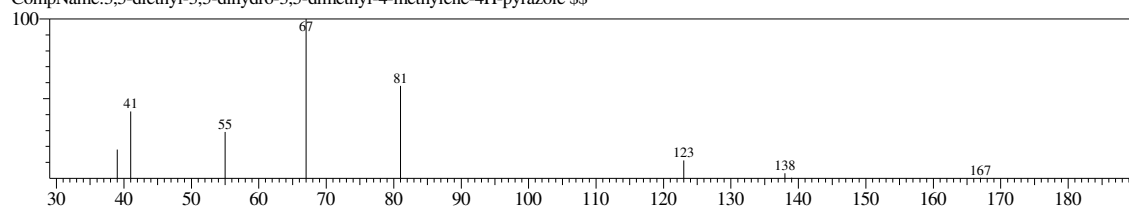

Hit#:3 Entry:19943 Library:WILEY7.LIB

SI:72 Formula:C8 H16 O CAS:64275-73-6 MolWeight:128 RetIndex:0

CompName:5-Octen-1-ol, (Z)- (CAS) cis-5-Octen-1-ol (5Z)-Octen-1-ol \$\$

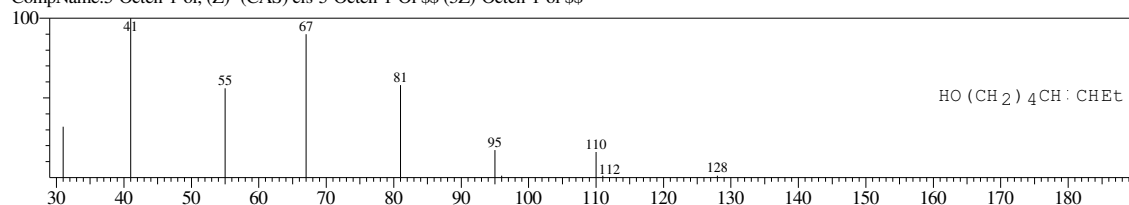

Hit#:4 Entry:125005 Library:WILEY7.LIB

SI:72 Formula:C9 H14 Cl2 O2 CAS:86338-70-7 MolWeight:224 RetIndex:0

CompName:CYCLOHEXANEMETHYL DICHLOROACETATE \$\$

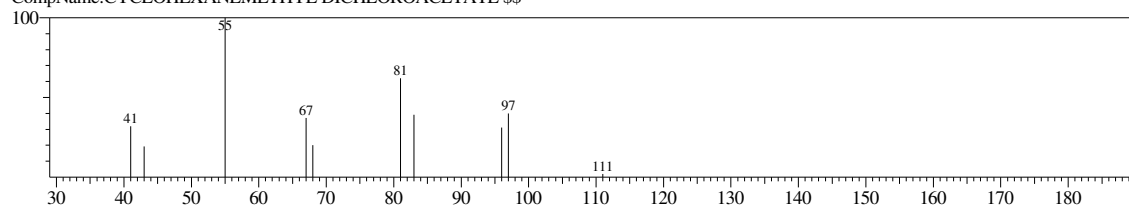

Hit#:5 Entry:42678 Library:WILEY7.LIB

SI:70 Formula:C9 H14 O2 CAS:0-00-0 MolWeight:154 RetIndex:0

CompName:4-Methyl-7-oxabicyclo[4.3.0]nonan-8-one \$\$

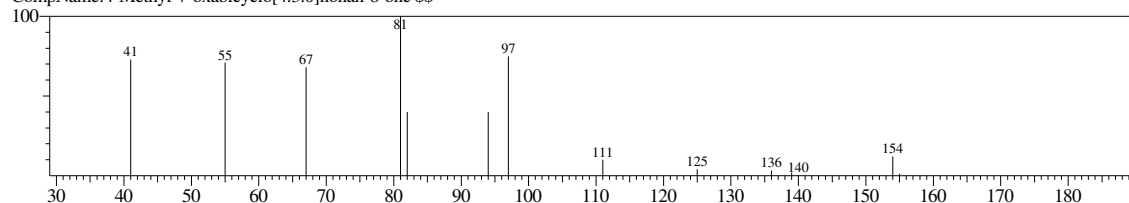

<< Target >>

Line#:37 R.Time:38.060(Scan#:3707) MassPeaks:15

RawMode:Averaged 38.050-38.070(3706-3708) BasePeak:100.10(1427)

BG Mode:Calc. from Peak Group 1 - Event 1

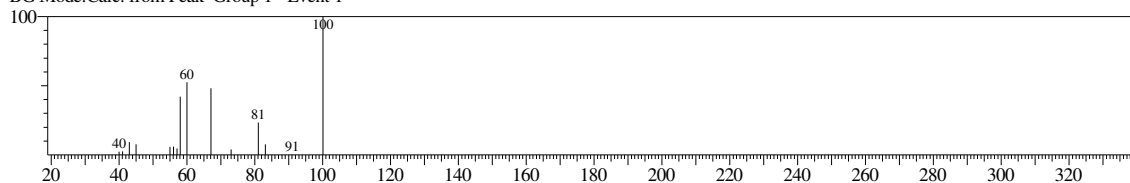

Hit#:1 Entry:6667 Library:WILEY7.LIB

SI:78 Formula:C3 H4 N2 S CAS:96-50-4 MolWeight:100 RetIndex:0

CompName:2-Thiazolamine (CAS) Abadol \$\$ 2-Aminothiazole \$\$ Abadol \$\$ Basedol \$\$ 2-Thiazolamine \$\$ Thiazole, 2-amino- \$\$ 4-Thiazolin-2-onim

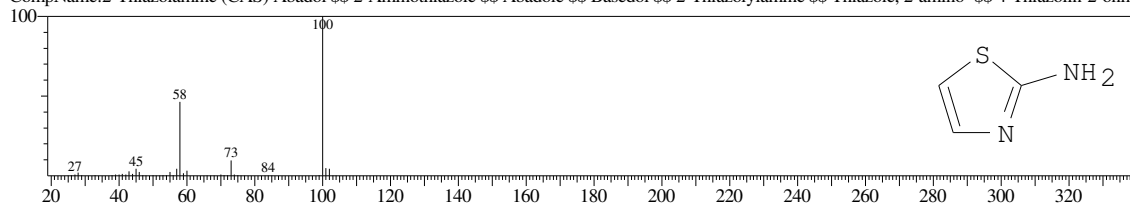

Hit#:2 Entry:44459 Library:WILEY7.LIB

SI:68 Formula:C9 H17 N O CAS:57620-53-8 MolWeight:155 RetIndex:0

CompName:N-(1,1-dimethyl-4-pentenyl)acetamide \$\$

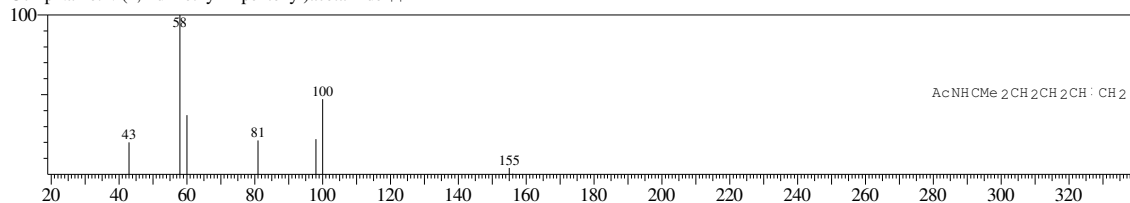

Hit#:3 Entry:255976 Library:WILEY7.LIB

SI:67 Formula:C12 H21 BR2 N O CAS:0-00-0 MolWeight:353 RetIndex:0

CompName:

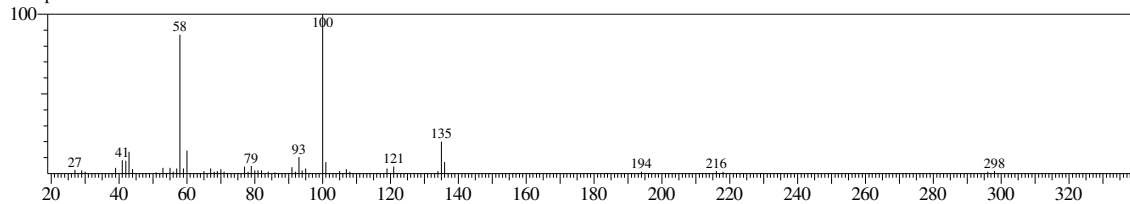

Hit#:4 Entry:245978 Library:WILEY7.LIB

SI:67 Formula:C22 H45 N O CAS:16528-77-1 MolWeight:339 RetIndex:0

CompName:MORPHOLINE, 4-OCTADECYL-

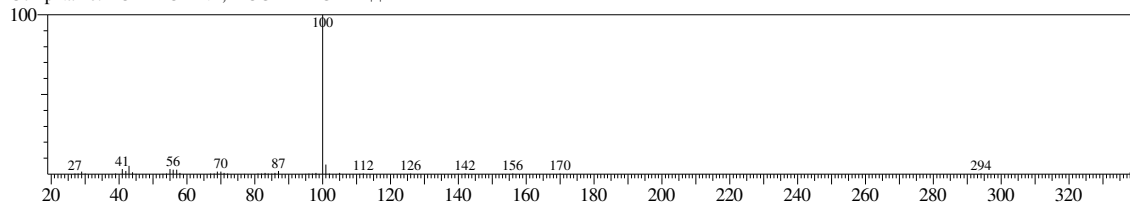

Hit#:5 Entry:12890 Library:WILEY7.LIB

SI:65 Formula:C3 H9 N3 SI CAS:4648-54-8 MolWeight:115 RetIndex:0

CompName:TRIMETHYLSILYLAZID

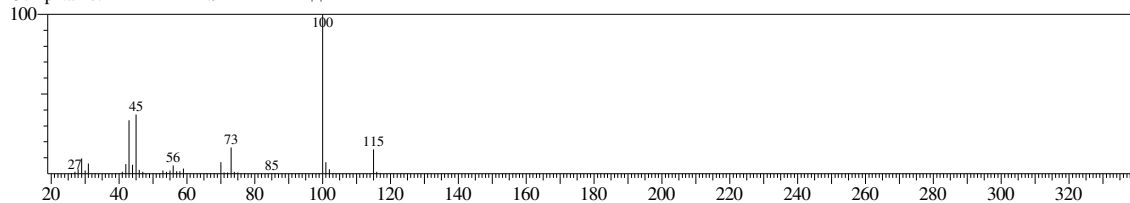

<< Target >>

Line#:38 R.Time:38.440(Scan#:3745) MassPeaks:22

RawMode:Averaged 38.430-38.450(3744-3746) BasePeak:74.05(1572)

BG Mode:Calc. from Peak Group 1 - Event 1

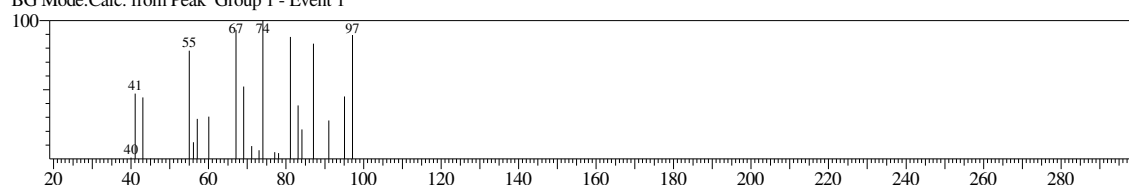

Hit#:1 Entry:61148 Library:WILEY7.LIB

SI:75 Formula:C10 H18 O2 CAS:20681-51-0 MolWeight:170 RetIndex:0

CompName:METHYLESTER OF 3-CYCLOHEXYL-PROPIONIC ACID \$\$ Cyclohexanepropanoic acid, methyl ester (CAS) Cyclohexanepropanoic acid,

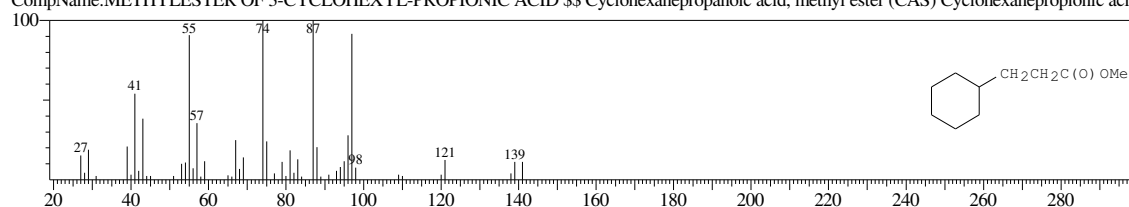

Hit#:2 Entry:61150 Library:WILEY7.LIB

SI:74 Formula:C10 H18 O2 CAS:20681-51-0 MolWeight:170 RetIndex:0

CompName:METHYLESTER OF 3-CYCLOHEXYL-PROPIONIC ACID \$\$ Cyclohexanepropanoic acid, methyl ester (CAS) Cyclohexanepropanoic acid,

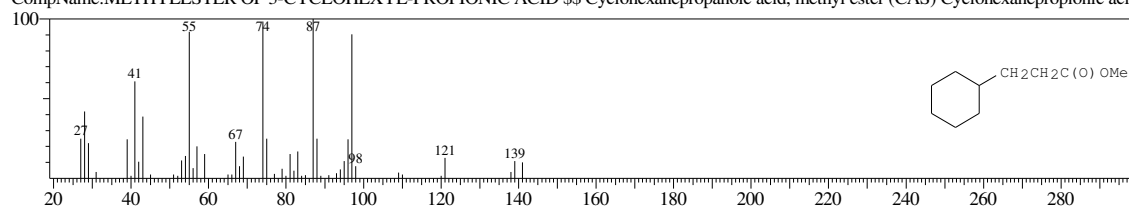

Hit#:3 Entry:177662 Library:WILEY7.LIB

SI:72 Formula:C17 H32 O2 CAS:25779-85-5 MolWeight:268 RetIndex:0

CompName:Cyclopentaneundecanoic acid, methyl ester (CAS) METHYL 11-CYCLOPENTYLUNDECANOATE \$\$ Methyl dihydrohydnicarpatate \$\$

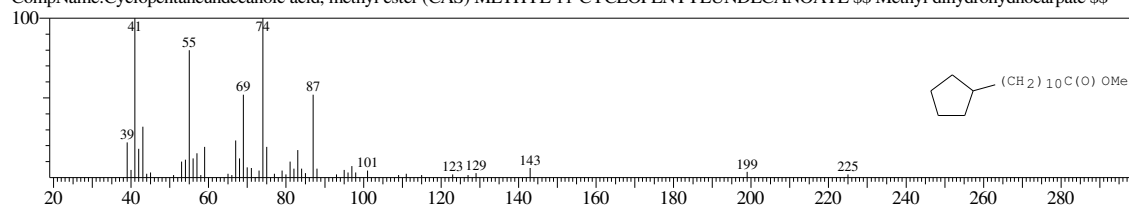

Hit#:4 Entry:234094 Library:WILEY7.LIB

SI:72 Formula:C21 H40 O2 CAS:27070-40-2 MolWeight:324 RetIndex:0

CompName:Eicosenoic acid, methyl ester (CAS) METHYL EICOSENOATE \$\$

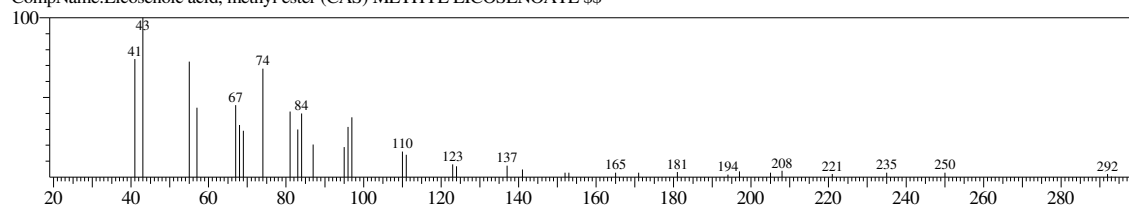

Hit#:5 Entry:164491 Library:WILEY7.LIB

SI:72 Formula:C16 H32 O2 CAS:5129-66-8 MolWeight:256 RetIndex:0

CompName:Tetradecanoic acid, 12-methyl-, methyl ester (CAS) Methyl 12-methyltetradecanoate \$\$

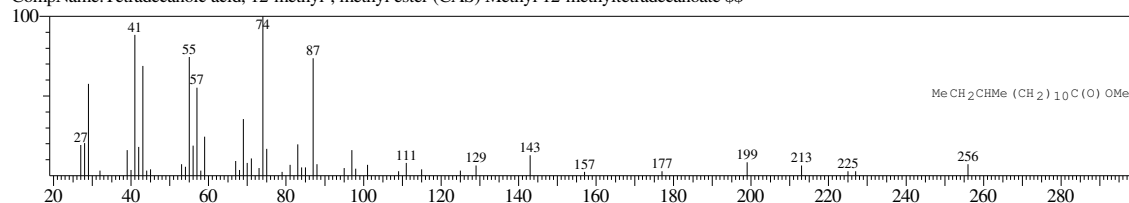



<< Target >>

Line#:39 R.Time:38.960(Scan#:3797) MassPeaks:27

RawMode:Averaged 38.950-38.970(3796-3798) BasePeak:67.05(3921)

BG Mode:Calc. from Peak Group 1 - Event 1

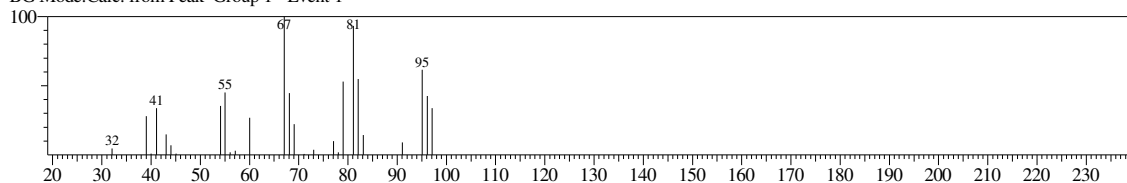

Hit#:1 Entry:17366 Library:WILEY7.LIB

SI:82 Formula:C9 H16 CAS:13152-05-1 MolWeight:124 RetIndex:0

CompName:CYCLOOCTENE, 3-METHYL- \$\$

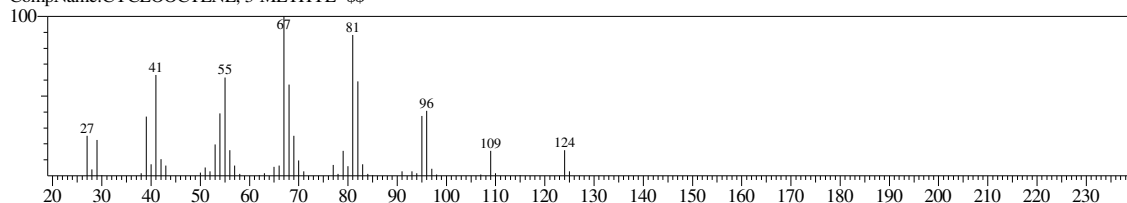

Hit#:2 Entry:33402 Library:WILEY7.LIB

SI:82 Formula:C8 H16 O2 CAS:3971-29-7 MolWeight:144 RetIndex:0

CompName:1,2-Cyclohexanedimethanol (CAS) CYCLOHEXAN, 1,2-BIS(HYDROXYMETHYL)- \$ 1,2-Bis(hydroxymethyl)cyclohexane \$\$

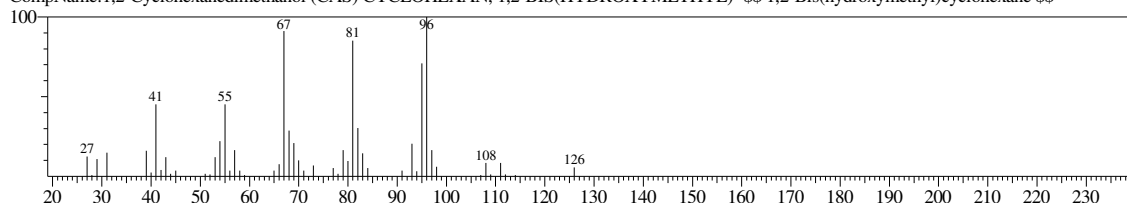

Hit#:3 Entry:17292 Library:WILEY7.LIB

SI:82 Formula:C9 H16 CAS:821-74-9 MolWeight:124 RetIndex:0

CompName:4,5-Nonadiene (CAS)

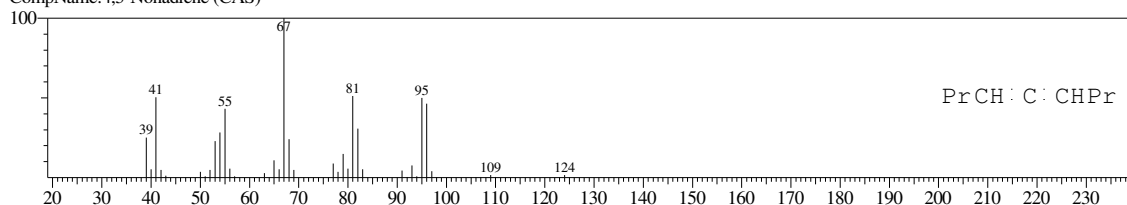

Hit#:4 Entry:5436 Library:WILEY7.LIB

SI:81 Formula:C7 H12 CAS:1192-37-6 MolWeight:96 RetIndex:0

CompName:Cyclohexane, methylene- (CAS) Methylene cyclohexane \$ METHYLENE-CYCLOHEXANE \$ 1-Methylenecyclohexane \$ \$ CYCLOHEXA

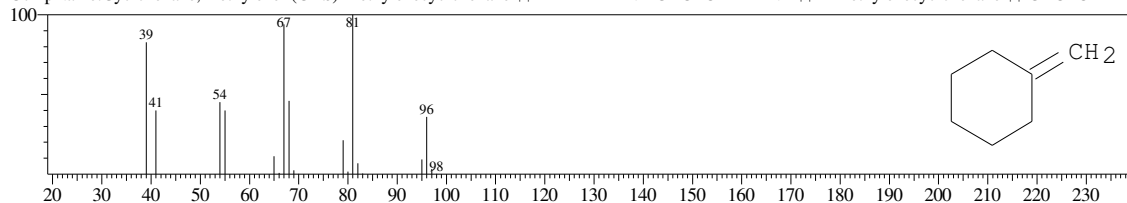

Hit#:5 Entry:226376 Library:WILEY7.LIB

SI:81 Formula:C17 H33 BR CAS:56600-21-6 MolWeight:316 RetIndex:0

CompName:5-Heptadecene, 1-bromo- (CAS) 1-BROMOHEPTADEC-5-ENE \$ \$

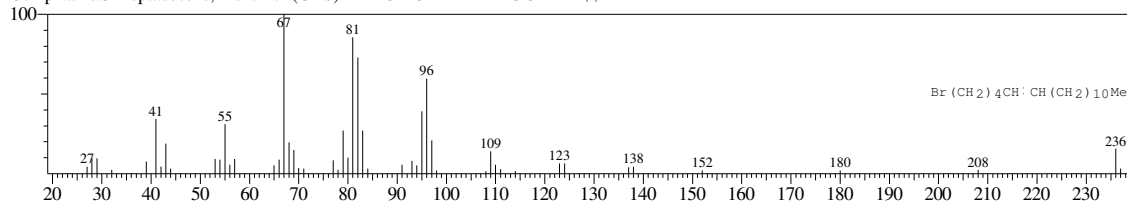

<< Target >>

Line#:40 R.Time:39.660(Scan#:3867) MassPeaks:13

RawMode:Averaged 39.650-39.670(3866-3868) BasePeak:39.05(1082)

BG Mode:Calc. from Peak Group 1 - Event 1

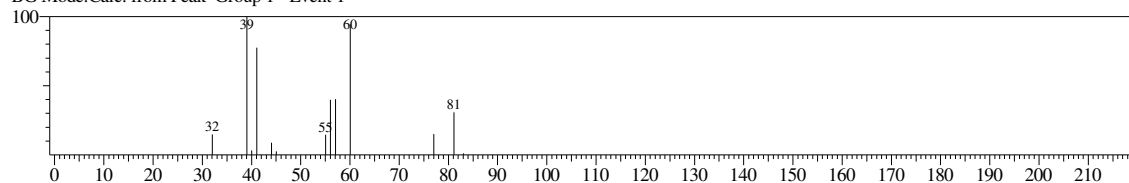

Hit#1 Entry:7126 Library:WILEY7.LIB

SI:71 Formula:C6 H12 O CAS:109-53-5 MolWeight:100 RetIndex:0

CompName:Propane, 1-(ethenyloxy)-2-methyl- (CAS) Isobutyl vinyl ether \$ IVE \$ Vinoflex MO 400 \$ Lutanol LR 8500 \$ Vinyl isobutyl ether \$ Eth

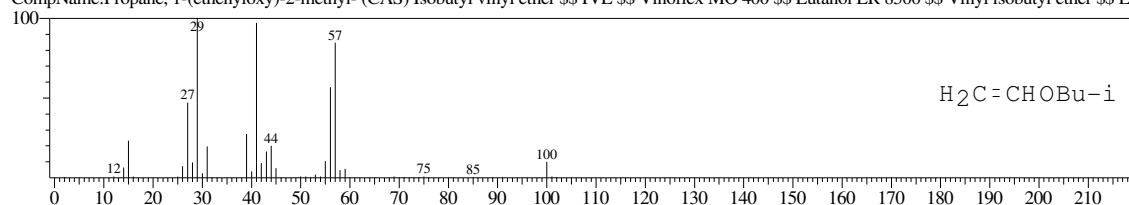

Hit#2 Entry:4657 Library:WILEY7.LIB

SI:71 Formula:C4 H9 Cl CAS:507-20-0 MolWeight:92 RetIndex:0

CompName:Propane, 2-chloro-2-methyl- (CAS) tert-Butyl chloride \$ 2-Chloro-2-methylpropane \$ 2-Chloroisobutane \$ Trimethylchloromethane \$ Ter

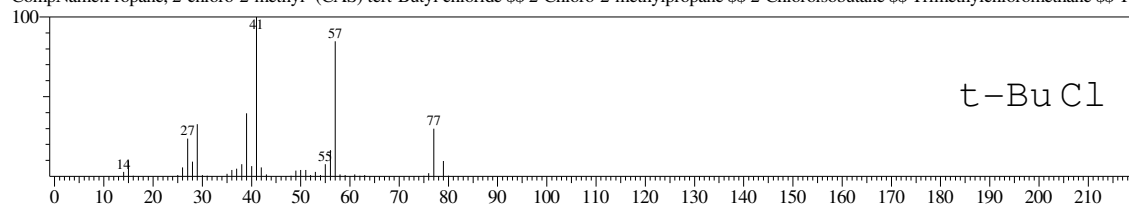

Hit#3 Entry:8122 Library:WILEY7.LIB

SI:70 Formula:C4 H6 D3 N O2 CAS:55887-92-8 MolWeight:103 RetIndex:0

CompName:1-AMINOISOPROPANE-1-CARBOXYLIC ACID-D3 \$

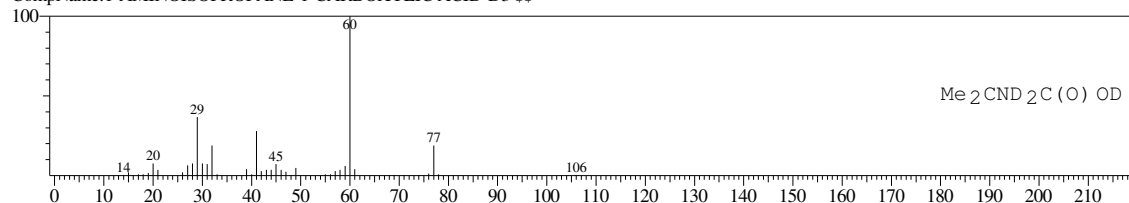

Hit#4 Entry:8156 Library:WILEY7.LIB

SI:70 Formula:C4 H9 N O2 CAS:627-05-4 MolWeight:103 RetIndex:0

CompName:Butane, 1-nitro- (CAS) 1-Nitrobutane \$ n-C4H9NO2 \$

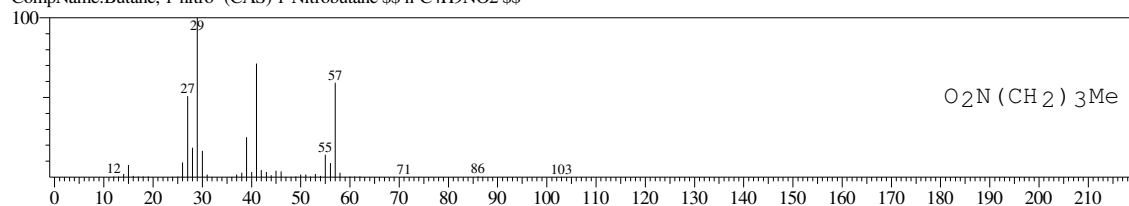

Hit#5 Entry:104535 Library:WILEY7.LIB

SI:70 Formula:C7 H12 O3 S2 CAS:82979-46-2 MolWeight:208 RetIndex:0

CompName:t-butylsulfenylthioxomethoxyethanoic acid \$ Acetic acid, [[(1,1-dimethylethyl)thio]thioxomethoxy]- (CAS)

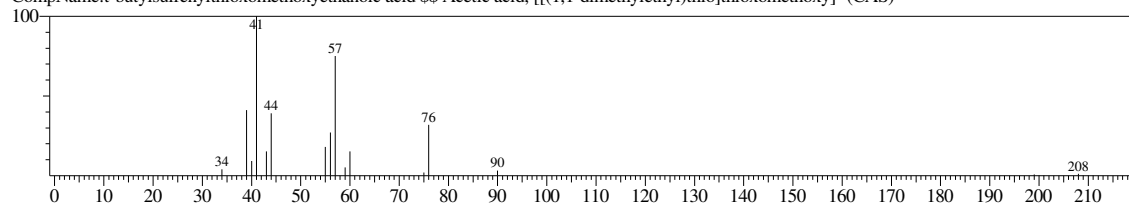

<< Target >>

Line#:41 R.Time:41.080(Scan#:4009) MassPeaks:20

RawMode:Averaged 41.070-41.090(4008-4010) BasePeak:60.05(1401)

BG Mode:Calc. from Peak Group 1 - Event 1

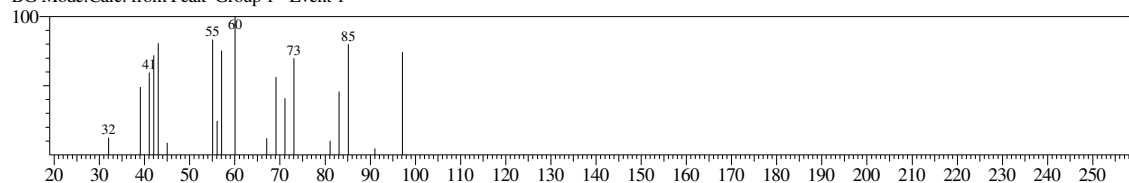

Hit#:1 Entry:164469 Library:WILEY7.LIB

SI:78 Formula:C16 H32 O2 CAS:57-10-3 MolWeight:256 RetIndex:0

CompName:Hexadecanoic acid (CAS) Palmitic acid \$\$ Palmitinic acid \$\$ n-Hexadecic acid \$\$ n-Hexadecanoic acid \$\$ Pentadecanecarboxylic acid \$

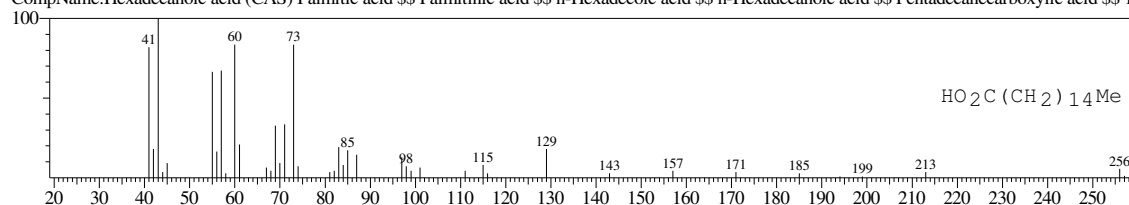

Hit#:2 Entry:47775 Library:WILEY7.LIB

SI:78 Formula:C9 H18 O2 CAS:112-05-0 MolWeight:158 RetIndex:0

CompName:Nonanoic acid (CAS) Nonoic acid \$\$ Nonylic acid \$\$ Pelargic acid \$\$ n-Nonoic acid \$\$ n-Nonylic acid \$\$ n-Nonanoic acid \$

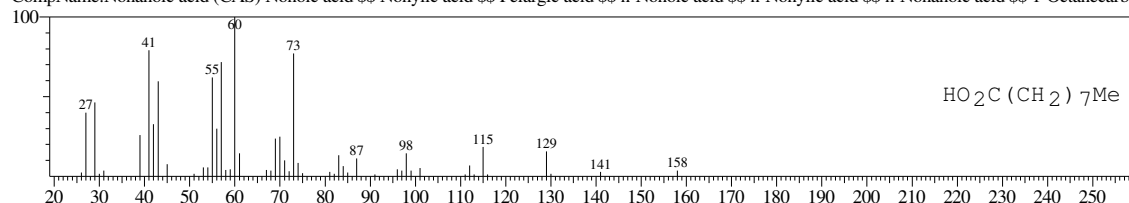

Hit#:3 Entry:95892 Library:WILEY7.LIB

SI:77 Formula:C12 H24 O2 CAS:143-07-7 MolWeight:200 RetIndex:0

CompName:Dodecanoic acid (CAS) Lauric acid \$\$ ABL \$\$ Neo-Fat 12 \$\$ Vulvic acid \$\$ Univol U-314 \$\$ Aliphatic No. 4 \$\$ Neo-Fat 12-43 \$\$ Dodecylc

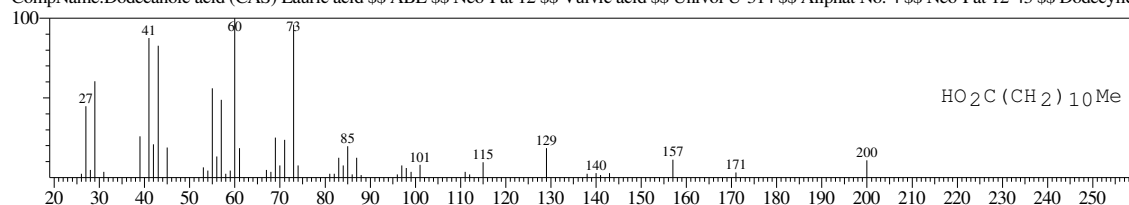

Hit#:4 Entry:131447 Library:WILEY7.LIB

SI:77 Formula:C14 H28 O2 CAS:544-63-8 MolWeight:228 RetIndex:0

CompName:Tetradecanoic acid (CAS) Myristic acid \$\$ MYRISTINIC ACID \$\$ n-Tetradecanoic acid \$\$ neo-Fat 14 \$\$ Univol U 316S \$\$ n-Tetradecoic ac

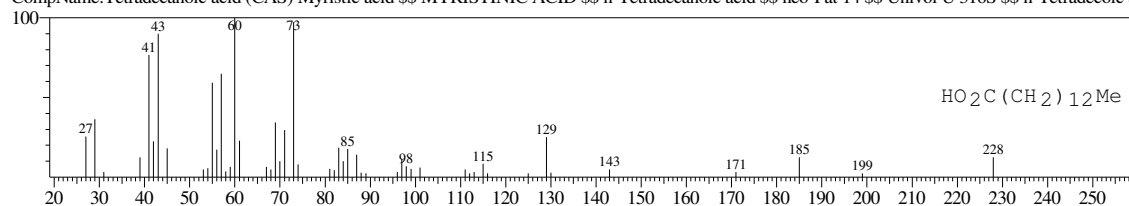

Hit#:5 Entry:193348 Library:WILEY7.LIB

SI:77 Formula:C18 H34 O2 CAS:112-80-1 MolWeight:282 RetIndex:0

CompName:9-Octadecenoic acid (Z)- (CAS) Oleic acid \$\$ Red oil \$\$ Oelsauere \$\$ Oleine 7503 \$\$ Pamolyn 100 \$\$ Emersol 211 \$\$ Vopcolene 27 \$\$ cis-C

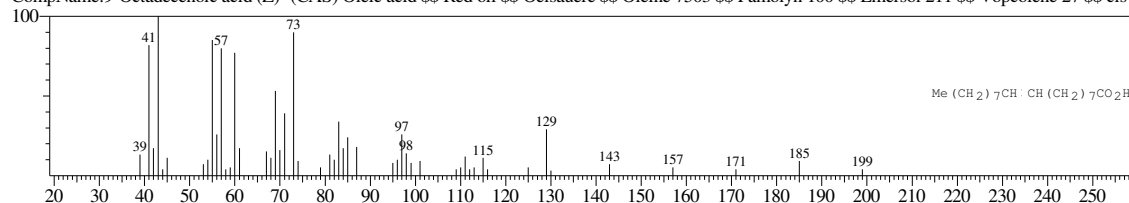

<< Target >>

Line#:42 R.Time:41.840(Scan#:4085) MassPeaks:20

RawMode:Averaged 41.830-41.850(4084-4086) BasePeak:95.05(1154)

BG Mode:Calc. from Peak Group 1 - Event 1

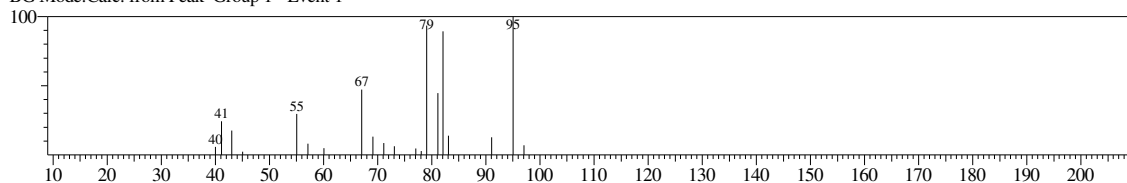

Hit#1 Entry:20593 Library:WILEY7.LIB

SI:79 Formula:C8 H16 O CAS:4442-79-9 MolWeight:128 RetIndex:0

CompName:Cyclohexaneethanol (CAS) 2-Cyclohexylethanol \$\$ 2-CYCLOHEXYL-ETHANOL \$\$ Cyclohexylethyl alcohol \$\$ .beta.-Cyclohexylethyl alc

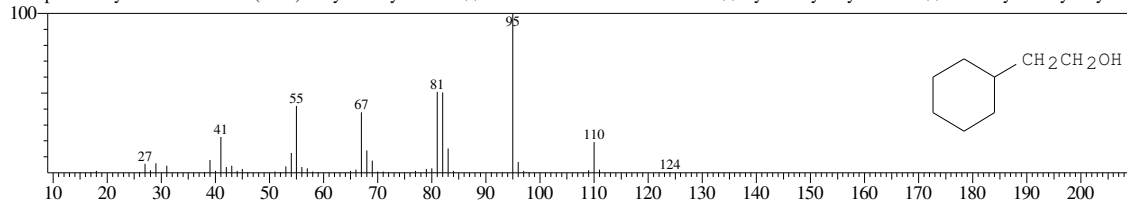

Hit#2 Entry:27600 Library:WILEY7.LIB

SI:76 Formula:C10 H18 CAS:68998-20-9 MolWeight:138 RetIndex:0

CompName:1,1'-Bicyclopropyl, 2,2,2',2'-tetramethyl- (CAS) CYCLOPROPANE, 1,1-DIMETHYL-2-(2,2-DIMETHYLCYCLOPROPYL)- \$\$

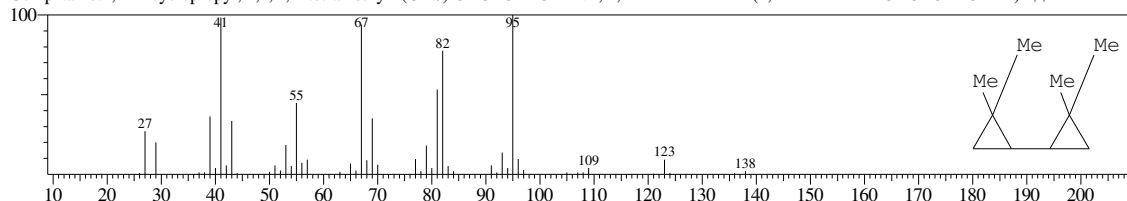

Hit#3 Entry:192969 Library:WILEY7.LIB

SI:75 Formula:C18 H34 O2 CAS:0-00-0 MolWeight:282 RetIndex:0

CompName:LAURINSAEURE, HEX-3-ENYLESTER \$\$

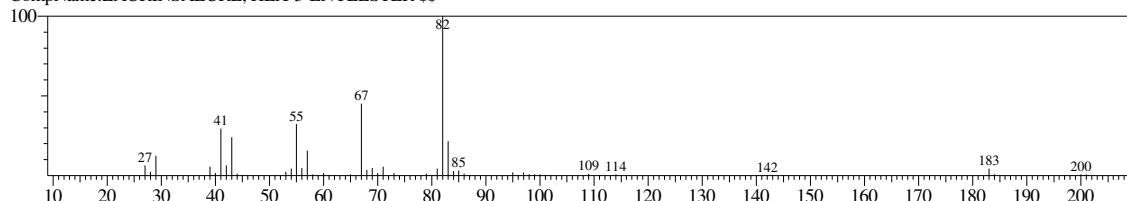

Hit#4 Entry:27587 Library:WILEY7.LIB

SI:75 Formula:C10 H18 CAS:13837-70-2 MolWeight:138 RetIndex:0

CompName:m-Menth-6-ene, (R)-(+)- (CAS) (+)-M-MENTH-1(6)-ENE \$\$ Cyclohexene, 1-methyl-5-(1-methylethyl)-, (R)- (CAS)

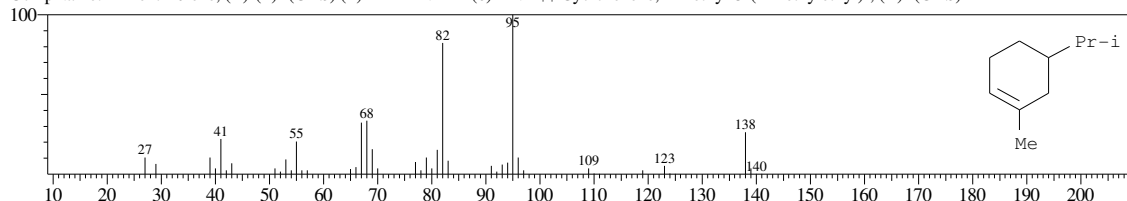

Hit#5 Entry:40015 Library:WILEY7.LIB

SI:75 Formula:C10 H16 O CAS:91531-48-5 MolWeight:152 RetIndex:0

CompName:2-(2'-Methyl-1'-propenyl)-1-vinylcyclobutanol (isomer A) \$\$ Cyclobutanol, 1-ethenyl-2-(2-methyl-1-propenyl)-, cis- (CAS)

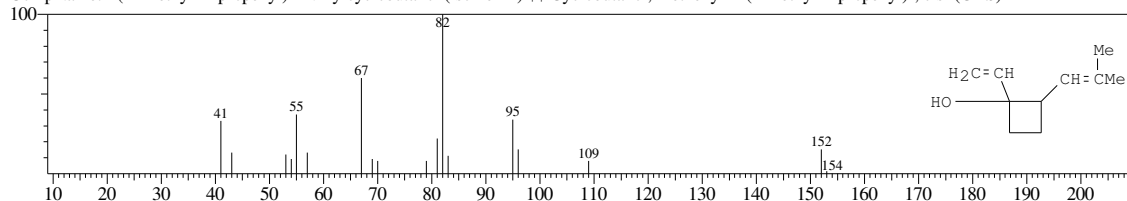

<< Target >>

Line#:43 R.Time:52.720(Scan#:5173) MassPeaks:20

RawMode:Averaged 52.710-52.730(5172-5174) BasePeak:70.10(1311)

BG Mode:Calc. from Peak Group 1 - Event 1

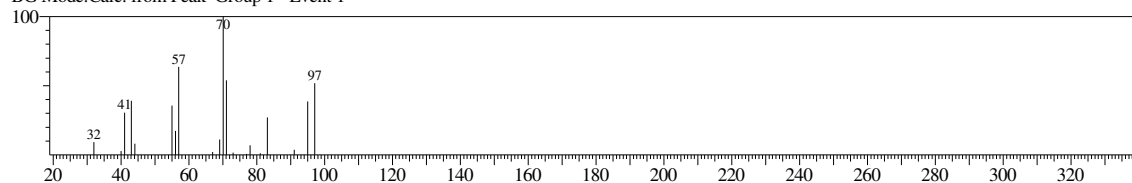

Hit#1 Entry:21491 Library:WILEY7.LIB

SI:83 Formula:C8 H18 O CAS:0-00-0 MolWeight:130 RetIndex:0

CompName:2,3,4-trimethyl-1-pentanol \$\$

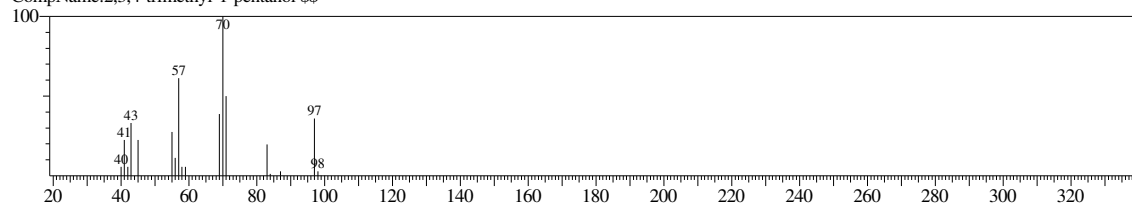

Hit#2 Entry:242226 Library:WILEY7.LIB

SI:79 Formula:C21 H34 O3 CAS:71325-95-6 MolWeight:334 RetIndex:0

CompName:2(3H)-Furanone, 3-(15-hexadecynyldene)dihydro-4-hydroxy-5-methyl-, [4S-(3Z,4.alpha.,5.alpha.)]- \$\$ 2(3H)-Furanone, 3-(15-hexadecynyldene)dihydro-4-hydroxy-5-methyl-, [4S-(3Z,4.alpha.,5.alpha.)]-

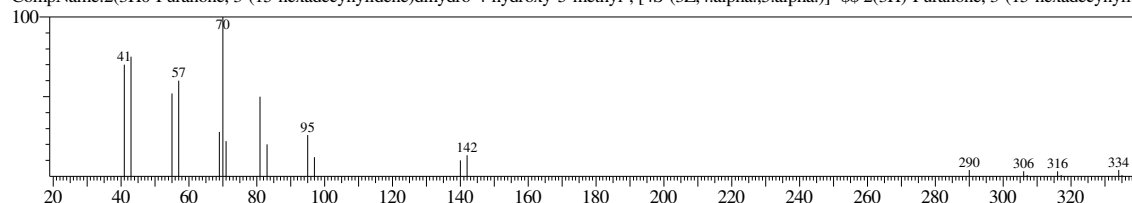

Hit#3 Entry:58304 Library:WILEY7.LIB

SI:79 Formula:C12 H24 CAS:74630-67-4 MolWeight:168 RetIndex:0

CompName:5-Undecene, 3-methyl-, (E)- (CAS)

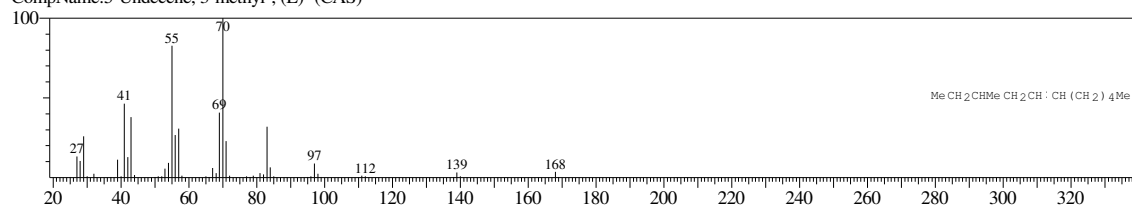

Hit#4 Entry:74062 Library:WILEY7.LIB

SI:79 Formula:C13 H26 CAS:49622-17-5 MolWeight:182 RetIndex:0

CompName:1-DECENE, 3,3,4-TRIMETHYL- \$\$

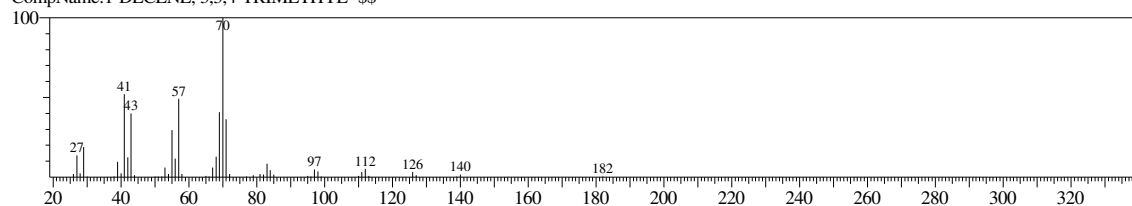

Hit#5 Entry:58279 Library:WILEY7.LIB

SI:78 Formula:C12 H24 CAS:74630-46-9 MolWeight:168 RetIndex:0

CompName:2-Undecene, 9-methyl-, (E)- (CAS)

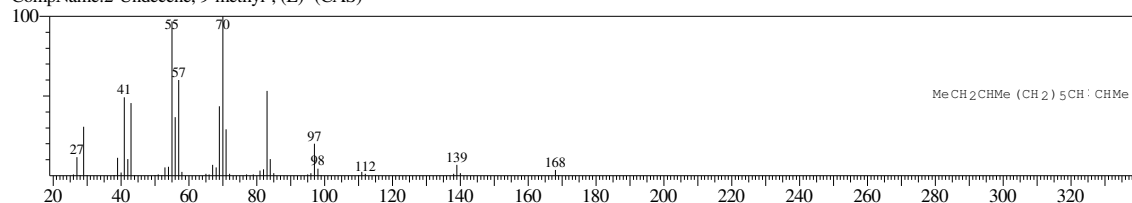

<< Target >>

Line#:44 R.Time:53.700(Scan#:5271) MassPeaks:16

RawMode:Averaged 53.690-53.710(5270-5272) BasePeak:85.10(1517)

BG Mode:Calc. from Peak Group 1 - Event 1

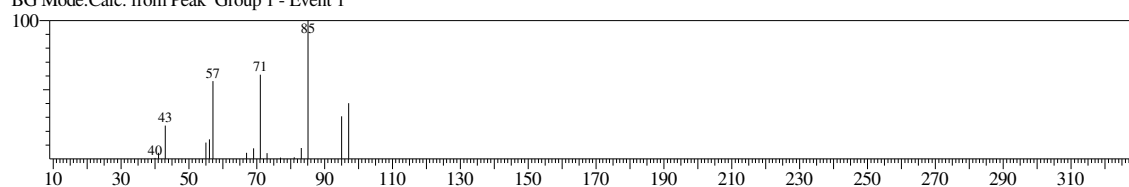

Hit#1 Entry:245565 Library:WILEY7.LIB

SI:78 Formula:C<sub>24</sub>H<sub>50</sub> CAS:1928-30-9 MolWeight:338 RetIndex:0

CompName:Tricosane, 2-methyl- (CAS) 2-Methyltricosane \$\$

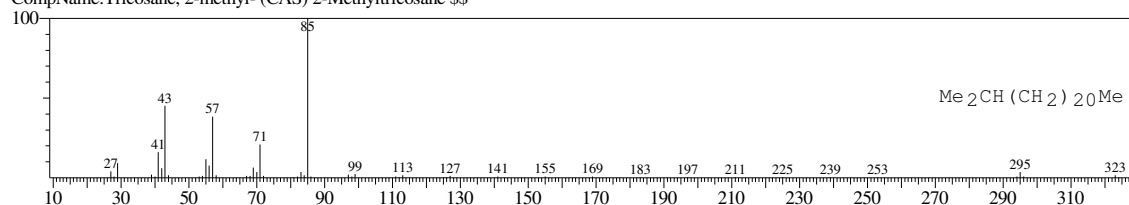

Hit#2 Entry:20054 Library:WILEY7.LIB

SI:76 Formula:C<sub>8</sub>H<sub>16</sub>O CAS:0-00-0 MolWeight:128 RetIndex:0

CompName:2,2,4,4-Tetramethylcyclobutan-1-ol \$\$

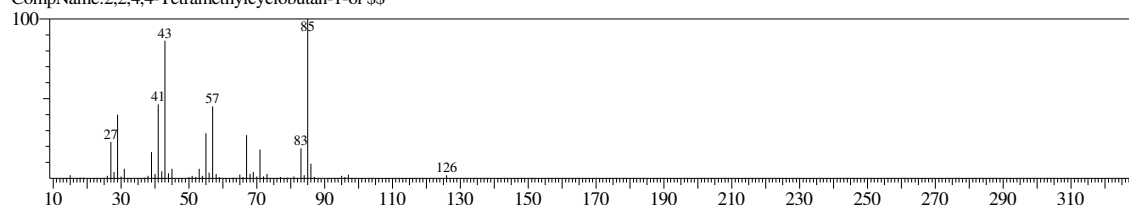

Hit#3 Entry:20032 Library:WILEY7.LIB

SI:75 Formula:C<sub>8</sub>H<sub>16</sub>O CAS:56470-83-8 MolWeight:128 RetIndex:0

CompName:CYCLOPENTANOL, 2,4,4-TRIMETHYL- \$\$

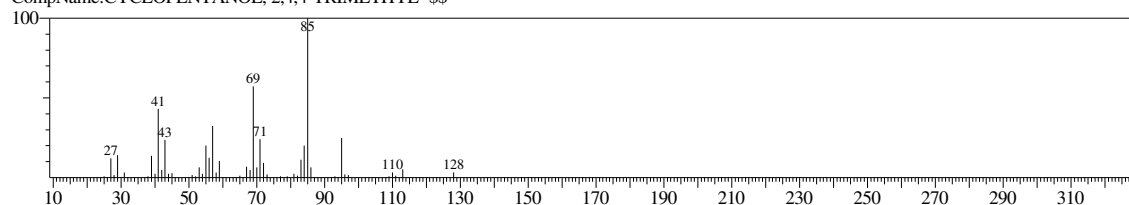

Hit#4 Entry:20061 Library:WILEY7.LIB

SI:75 Formula:C<sub>8</sub>H<sub>16</sub>O CAS:0-00-0 MolWeight:128 RetIndex:0

CompName:1-Isopropyl-2,2-dimethyl-4-oxacyclobutane \$\$ 1-Isopropyl-2,2-dimethyl-1,3-epoxypropane \$\$

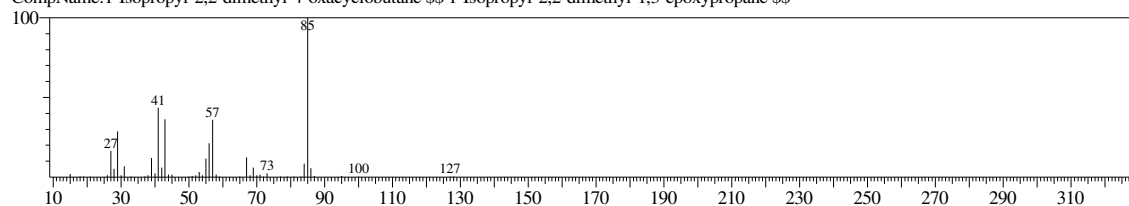

Hit#5 Entry:195010 Library:WILEY7.LIB

SI:75 Formula:C<sub>17</sub>H<sub>32</sub>O<sub>3</sub> CAS:0-00-0 MolWeight:284 RetIndex:0

CompName:METHYL ALPHA-KETOPALMITATE \$\$

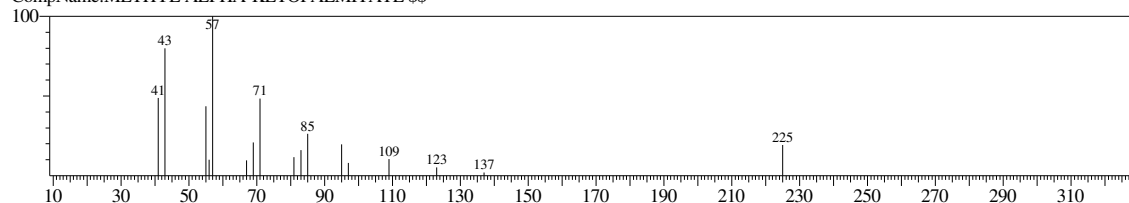

Supplement: f1 [file 3092246.f1.zip]
