# Supplementary material for: Panelist Acceptance, Proximate Characteristics of Amino Acids and Volatile Compounds, and Color Profile of Fermented Cempedak (Artocarpus champeden) and Oyster Mushroom (Pleurotus ostreatus) Seasoning
Source: Hindawi journal article supplement (doi:10.1155/2022/3092246), 2022-07-07

Analyzed by :Laboratorium Biosain  
Sample Type : bubuk mandai  
Level # : 1  
Sample Name : bubuk mandai  
Sample ID : bubuk mandai  
IS Amount : [1]=1.000  
Sample Amount : 1.000  
Dilution Factor : 1.000  
Vial # : 1  
Injection Volume : 1.000  
Data File : C:\GCMSsolution\Data\Project 1\analisa volatil\bubuk mandai.qgd  
Org Data File : C:\GCMSsolution\Data\Project 1\analisa volatil\bubuk mandai.qgd  
Tuning File : C:\GCMSsolution\System\Tune 1\novita 05042021.qgt  
Modified by : Admin

#### Method

[Comment]

===== Analytical Line 1 =====

[GC-2010]

Column Oven Temp. :60.0 °C  
Injection Temp. :260.00 °C  
Injection Mode :Splitless  
Sampling Time :1.00 min  
Flow Control Mode :Pressure  
Pressure :38.9 kPa  
Total Flow :37.5 mL/min  
Column Flow :0.78 mL/min  
Linear Velocity :32.2 cm/sec  
Purge Flow :3.0 mL/min  
Split Ratio :-1.0  
High Pressure Injection :OFF  
Carrier Gas Saver :OFF  
Oven Temp. Program  

| Rate | Temperature(°C) | Hold Time(min) |
|------|-----------------|----------------|
| -    | 60.0            | 3.00           |
| 5.00 | 220.0           | 20.00          |

< Ready Check Heat Unit >

Column Oven : Yes  
SPL1 : Yes  
MS : Yes

< Ready Check Detector(FTD) >

< Ready Check Baseline Drift >

< Ready Check Injection Flow >

SPL1 Carrier : Yes  
SPL1 Purge : Yes

< Ready Check APC Flow >

< Ready Check Detector APC Flow >

External Wait :No  
Equilibrium Time :3.0 min

[GC Program]

[GCMS-QP2010 Plus]

IonSourceTemp :200.00 °C  
Interface Temp. :200.00 °C  
Solvent Cut Time :1.00 min  
Detector Gain Mode :Relative  
Detector Gain :0.00 kV  
Threshold :1000

[MS Table]

--Group 1 - Event 1--

Start Time :1.00min  
End Time :55.00min  
ACQ Mode :Scan  
Event Time :0.60sec  
Scan Speed : 555  
Start m/z :30.00  
End m/z :350.00

Sample Inlet Unit :GC

[MS Program]

Use MS Program :OFF

## Chromatogram bubuk mandi

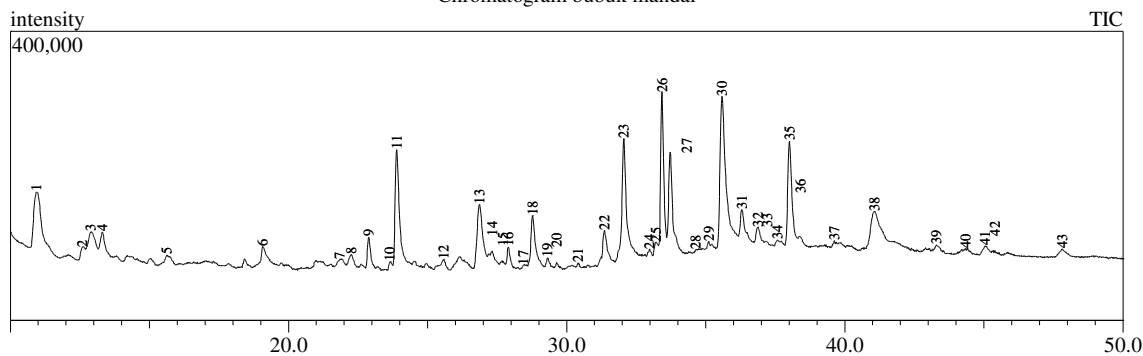

| Peak Report TIC |        |          |        |         |                                                                                                               |
|-----------------|--------|----------|--------|---------|---------------------------------------------------------------------------------------------------------------|
| Peak#           | R.Time | Area     | Area%  | Height  | Height% Name                                                                                                  |
| 1               | 10.940 | 1603140  | 6.48   | 80170   | 4.15 1-Hexanol, 2-ethyl- (CAS) 2-Ethylhexanol                                                                 |
| 2               | 12.580 | 199839   | 0.81   | 16933   | 0.88 Ethane, 1,1'-oxybis[2-ethoxy- (CAS) Bis(2-ethoxy- (CAS) Diethylene glycol                                |
| 3               | 12.882 | 690414   | 2.79   | 37195   | 1.93 Ethanol, 2,2'-oxybis- (CAS) Diethylene glycol                                                            |
| 4               | 13.306 | 451616   | 1.83   | 35806   | 1.85 1-Decanol (CAS) Decyl alcohol                                                                            |
| 5               | 15.624 | 158911   | 0.64   | 11406   | 0.59 Butanoic acid, butyl ester (CAS) n-Butyl n-butanoate                                                     |
| 6               | 19.070 | 289687   | 1.17   | 23788   | 1.23 1-Heptanol, 6-methyl- (CAS) 6-Methyl-1-heptanol                                                          |
| 7               | 21.830 | 145879   | 0.59   | 8995    | 0.47 Heptanoic acid (CAS) Heptanoic acid                                                                      |
| 8               | 22.258 | 187477   | 0.76   | 17062   | 0.88 1-PENTANOL, 5-CYCLOPROPYLIDEN- (CAS) 5-Cyclopropylidene-1-pentanol                                       |
| 9               | 22.880 | 342218   | 1.38   | 42828   | 2.22 2-Propenamide, 2-methyl-N-phenyl- (CAS) N-Phenyl-2-methylpropenamide                                     |
| 10              | 23.640 | 78486    | 0.32   | 10460   | 0.54 Decanoic acid, 2-hydroxy- (CAS) 2-HYDROXYDECANOIC ACID                                                   |
| 11              | 23.888 | 1704704  | 6.89   | 161934  | 8.38 1-Dodecanol (CAS) n-Dodecanol                                                                            |
| 12              | 25.571 | 87972    | 0.36   | 10447   | 0.54 2-Propyldecan-1-ol                                                                                       |
| 13              | 26.867 | 1263729  | 5.11   | 88623   | 4.59 Hexadecanoic acid (CAS) Palmitic acid                                                                    |
| 14              | 27.327 | 399341   | 1.61   | 23617   | 1.22 TRIDECANE, 4-CYCLOHEXYL- (CAS) 4-Cyclohexyltridecane                                                     |
| 15              | 27.720 | 95558    | 0.39   | 8997    | 0.47 1,3-Dimethyl-1,3-disubstituted-2,4-dione                                                                 |
| 16              | 27.904 | 218024   | 0.88   | 28177   | 1.46 2-Propenamide, 2-methyl-N-phenyl- (CAS) N-Phenyl-2-methylpropenamide                                     |
| 17              | 28.440 | 49095    | 0.20   | 4484    | 0.23 1-Propyl-1-[(tert-butyl(dimethylsilyl)oxy]perfluorooctane                                                |
| 18              | 28.776 | 878668   | 3.55   | 73019   | 3.78 1-Tridecanol (CAS) n-Tridecanol                                                                          |
| 19              | 29.303 | 110200   | 0.45   | 14139   | 0.73 Oxirane, 2,3-diethyl- (CAS) 3,4-EPOXYHEXANOL                                                             |
| 20              | 29.642 | 53342    | 0.22   | 7700    | 0.40 Cyclohexane, (1,1-dimethylethyl)- (CAS) tert-butylcyclohexane                                            |
| 21              | 30.412 | 33774    | 0.14   | 6659    | 0.34 DI-LAURYL THIO-DI-PROPIONATE                                                                             |
| 22              | 31.357 | 578653   | 2.34   | 47300   | 2.45 Octadecanoic acid, (2-phenyl-1,3-dioxolan-4-yl)- (CAS) 4-(2-Phenyl-1,3-dioxolan-4-yl)octadecanoic acid   |
| 23              | 32.054 | 2187537  | 8.85   | 170724  | 8.84 Oxirane, [(dodecyloxy)methyl]- (CAS) Lauryl glycidyl ether                                               |
| 24              | 32.983 | 209844   | 0.85   | 12769   | 0.66 Ethanedione, diphenyl- (CAS) Benzil                                                                      |
| 25              | 33.216 | 194009   | 0.78   | 21283   | 1.10 1-Undecene, 9-methyl- (CAS) 9-Methylundecene                                                             |
| 26              | 33.430 | 1832816  | 7.41   | 223136  | 11.55 MORPHOLINE, 4-OCTADECYL- (CAS) 4-Octadecylmorpholine                                                    |
| 27              | 33.726 | 1548787  | 6.26   | 142383  | 7.37 Furo[3,4-d]-1,3,2-dioxaborole, 2-ethyltetrahydro- (CAS) 2-Ethyl-2,3-dihydrofuro[3,4-d]-1,3,2-dioxaborole |
| 28              | 34.640 | 114834   | 0.46   | 4333    | 0.22 2H-Pyran-2-methanol, tetrahydro- (CAS) 2-METHYLTETRAHYDRO-2H-PYRAN-2-METHANOL                            |
| 29              | 35.111 | 203600   | 0.82   | 14874   | 0.77 Ethyl tridecanoate                                                                                       |
| 30              | 35.591 | 3491249  | 14.12  | 213019  | 11.03 9-Octadecenoic acid (Z)- (CAS) Oleic acid                                                               |
| 31              | 36.304 | 873440   | 3.53   | 56233   | 2.91 1-Docosanol (CAS) Behenic alcohol                                                                        |
| 32              | 36.876 | 452927   | 1.83   | 30882   | 1.60 1,14-Tetradecanediol (CAS) tetra Decamethyl-1,14-cyclohexanediol                                         |
| 33              | 37.220 | 107949   | 0.44   | 9651    | 0.50 Butanoic acid, 3-methyl-, 3-methylbutyl ester (CAS) 3-Methylbutyl 3-methylbutanoate                      |
| 34              | 37.584 | 226567   | 0.92   | 11528   | 0.60 5-Undecene, 3-methyl-, (E)- (CAS) (E)-3-Methylundecene                                                   |
| 35              | 38.014 | 1605271  | 6.49   | 146277  | 7.57 MORPHOLINE, 4-OCTADECYL- (CAS) 4-Octadecylmorpholine                                                     |
| 36              | 38.420 | 160694   | 0.65   | 13989   | 0.72 Nonanoic acid, 7-methyl-, methyl ester (CAS) Methyl 7-methylnonanoate                                    |
| 37              | 39.630 | 138434   | 0.56   | 8946    | 0.46 Silane, chloro(1,1-dimethylethyl)dimethyl- (CAS) Chlorotrimethylsilane                                   |
| 38              | 41.070 | 1099996  | 4.45   | 47795   | 2.47 9-Octadecenoic acid (Z)- (CAS) Oleic acid                                                                |
| 39              | 43.299 | 121247   | 0.49   | 9136    | 0.47 Nonane, 3-methyl-5-propyl- (CAS) 3-Methyl-5-propylnonane                                                 |
| 40              | 44.339 | 155524   | 0.63   | 7631    | 0.40 LAURINSAEURE, HEX-3-ENYLESTER                                                                            |
| 41              | 45.047 | 171670   | 0.69   | 11718   | 0.61 MORPHOLINE, 4-OCTADECYL- (CAS) 4-Octadecylmorpholine                                                     |
| 42              | 45.400 | 32844    | 0.13   | 4494    | 0.23 spiro[3.3]heptane-1,3-dicarboxaldehyde                                                                   |
| 43              | 47.817 | 180196   | 0.73   | 10750   | 0.56 Heptadecane, 2,6,10,15-tetramethyl- (CAS) 2,6,10,15-Tetramethylheptadecane                               |
|                 |        | 24730162 | 100.00 | 1931290 | 100.00                                                                                                        |

Library

<< Target >>

Line#:1 RTime:10.940(Scan#:995) MassPeaks:20

RawMode:Averaged 10.930-10.950(994-996) BasePeak:57.10(23785)

BG Mode:Calc. from Peak Group 1 - Event 1

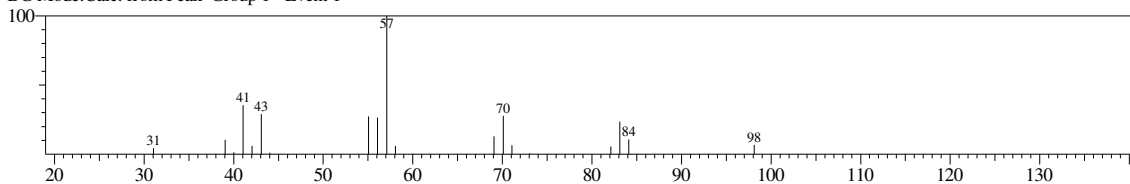

Hit#:1 Entry:22074 Library:WILEY7.LIB

SI:94 Formula:C8 H18 O CAS:104-76-7 MolWeight:130 RetIndex:0

CompName:1-Hexanol, 2-ethyl- (CAS) 2-Ethylhexanol \$\$ 2-Ethyl-1-hexanol \$\$ Ethylhexanol \$\$ 2-Ethylhexan-1-ol \$\$ 2-Ethylhexyl alcohol \$\$ 2-Ethyl-he:

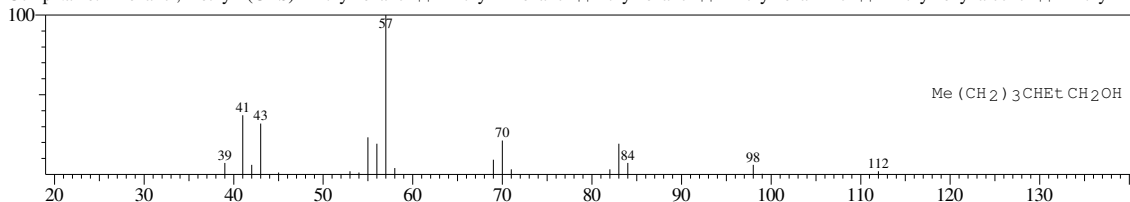

Hit#:2 Entry:22071 Library:WILEY7.LIB

SI:94 Formula:C8 H18 O CAS:104-76-7 MolWeight:130 RetIndex:0

CompName:1-Hexanol, 2-ethyl- (CAS) 2-Ethylhexanol \$\$ 2-Ethyl-1-hexanol \$\$ Ethylhexanol \$\$ 2-Ethylhexan-1-ol \$\$ 2-Ethylhexyl alcohol \$\$ 2-Ethyl-he:

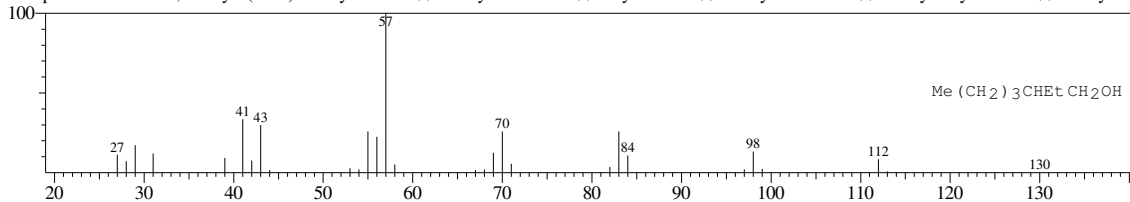

Hit#:3 Entry:22067 Library:WILEY7.LIB

SI:93 Formula:C8 H18 O CAS:104-76-7 MolWeight:130 RetIndex:0

CompName:1-Hexanol, 2-ethyl- (CAS) 2-Ethylhexanol \$\$ 2-Ethyl-1-hexanol \$\$ Ethylhexanol \$\$ 2-Ethylhexan-1-ol \$\$ 2-Ethylhexyl alcohol \$\$ 2-Ethyl-he:

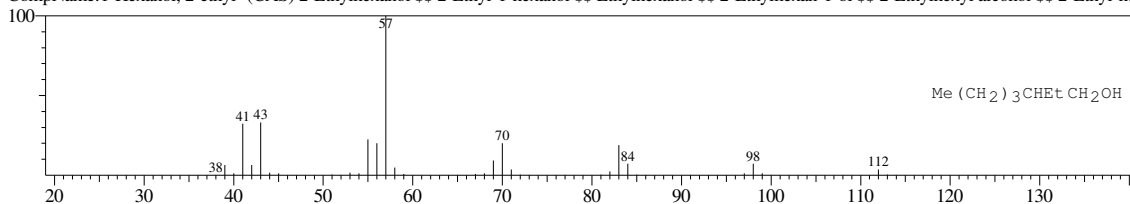

Hit#:4 Entry:22060 Library:WILEY7.LIB

SI:93 Formula:C8 H18 O CAS:104-76-7 MolWeight:130 RetIndex:0

CompName:1-Hexanol, 2-ethyl- (CAS) 2-Ethylhexanol \$\$ 2-Ethyl-1-hexanol \$\$ Ethylhexanol \$\$ 2-Ethylhexan-1-ol \$\$ 2-Ethylhexyl alcohol \$\$ 2-Ethyl-he:

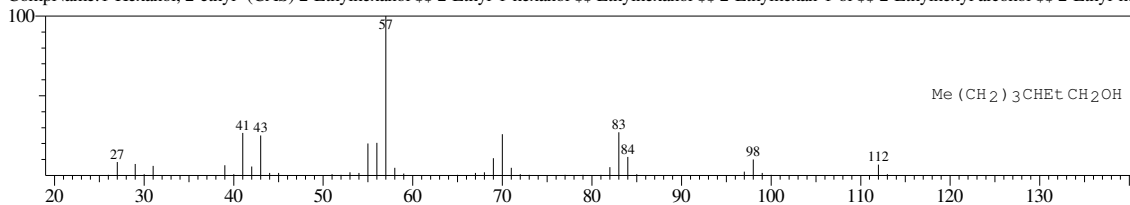

Hit#:5 Entry:22064 Library:WILEY7.LIB

SI:93 Formula:C8 H18 O CAS:104-76-7 MolWeight:130 RetIndex:0

CompName:1-Hexanol, 2-ethyl- (CAS) 2-Ethylhexanol \$\$ 2-Ethyl-1-hexanol \$\$ Ethylhexanol \$\$ 2-Ethylhexan-1-ol \$\$ 2-Ethylhexyl alcohol \$\$ 2-Ethyl-he:

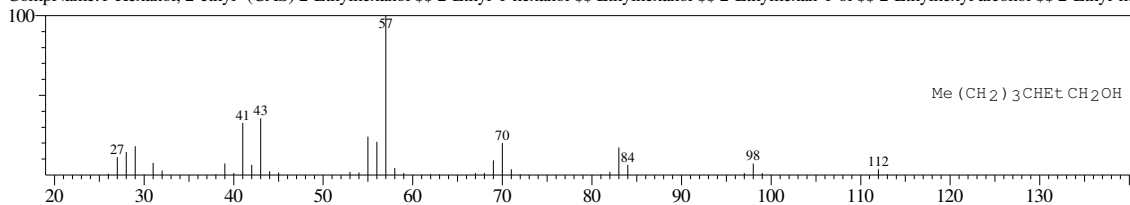

<< Target >>

Line#:2 R.Time:12.580(Scan#:1159) MassPeaks:15

RawMode:Averaged 12.570-12.590(1158-1160) BasePeak:45.05(2018)

BG Mode:Calc. from Peak Group 1 - Event 1

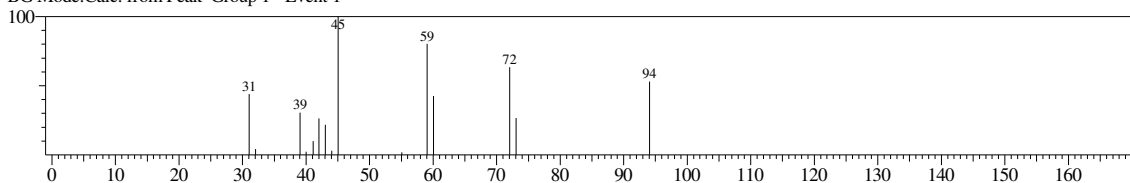

Hit#1 Entry:51453 Library:WILEY7.LIB

SI:81 Formula:C8 H18 O3 CAS:112-36-7 MolWeight:162 RetIndex:0

CompName:Ethane, 1,1'-oxybis[2-ethoxy- (CAS) Bis(2-ethoxyethyl) ether \$ Diethyl carbitol \$ 3,6,9-Trioxaundecane \$ Diethyldiethylene glycol \$ Eth

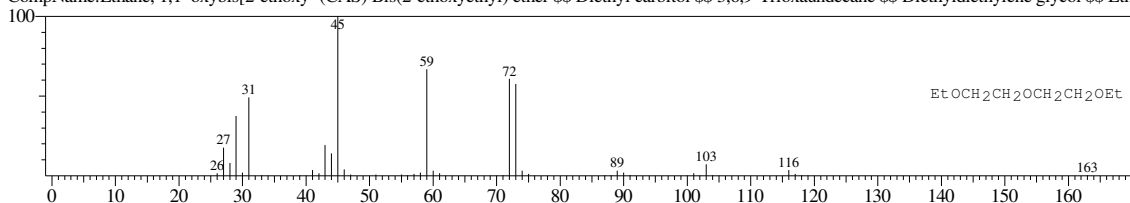

Hit#2 Entry:35811 Library:WILEY7.LIB

SI:81 Formula:C7 H16 O3 CAS:0-00-0 MolWeight:148 RetIndex:0

CompName:1-(Ethoxyethoxy)-2-propanol \$

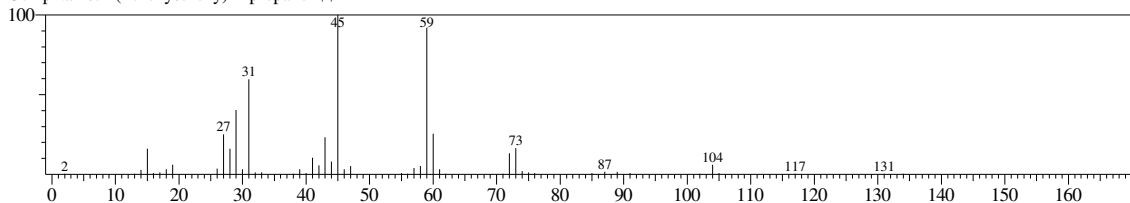

Hit#3 Entry:35815 Library:WILEY7.LIB

SI:80 Formula:C7 H16 O3 CAS:0-00-0 MolWeight:148 RetIndex:0

CompName:3,3-Diethoxypropanol \$

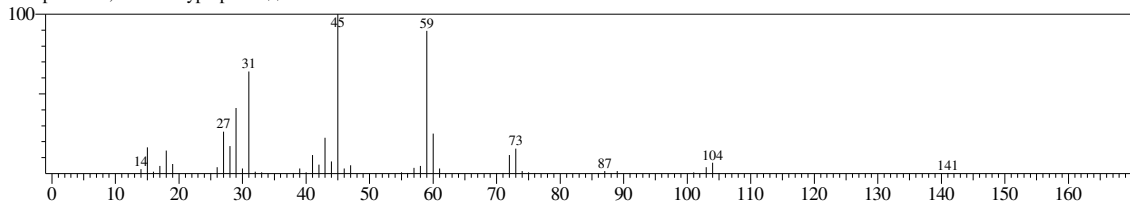

Hit#4 Entry:35810 Library:WILEY7.LIB

SI:80 Formula:C7 H16 O3 CAS:0-00-0 MolWeight:148 RetIndex:0

CompName:3,3,-Diethoxy-1-propanol \$

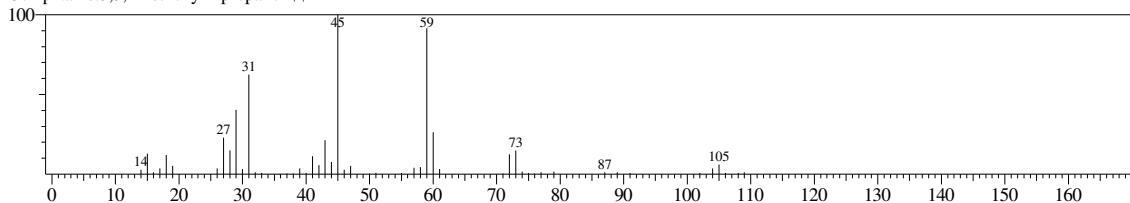

Hit#5 Entry:35816 Library:WILEY7.LIB

SI:80 Formula:C7 H16 O3 CAS:0-00-0 MolWeight:148 RetIndex:0

CompName:1-(Ethoxyethoxy)-2-propanol \$

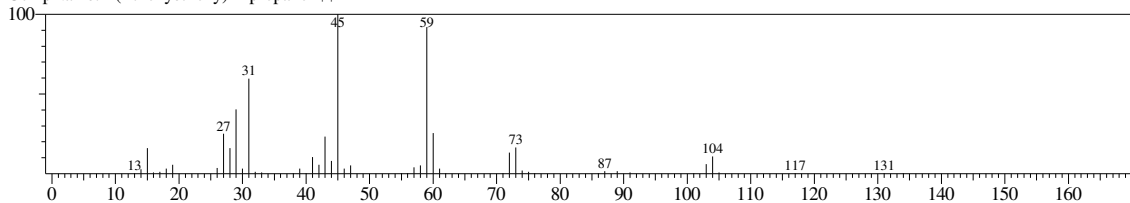

<< Target >>

Line#:3 R.Time:12.880(Scan#:1189) MassPeaks:16

RawMode:Averaged 12.870-12.890(1188-1190) BasePeak:45.05(9288)

BG Mode:Calc. from Peak Group 1 - Event 1

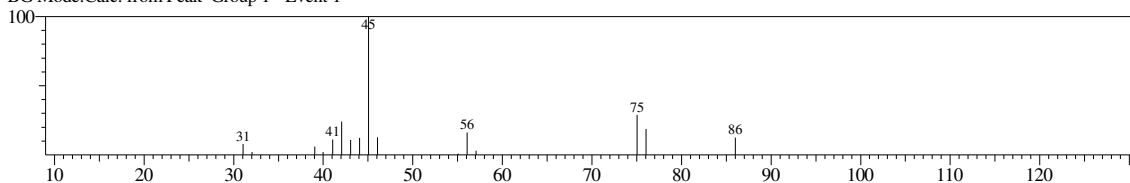

Hit#:1 Entry:8790 Library:WILEY7.LIB

SI:87 Formula:C4 H10 O3 CAS:111-46-6 MolWeight:106 RetIndex:0

CompName:Ethanol, 2,2'-oxybis- (CAS) Diethylene glycol \$\$ DEG \$\$ TL4N \$\$ Digol \$\$ Dicol \$\$ Digenos \$\$ Diglycol \$\$ Deactivator H \$\$ Brecolane NI

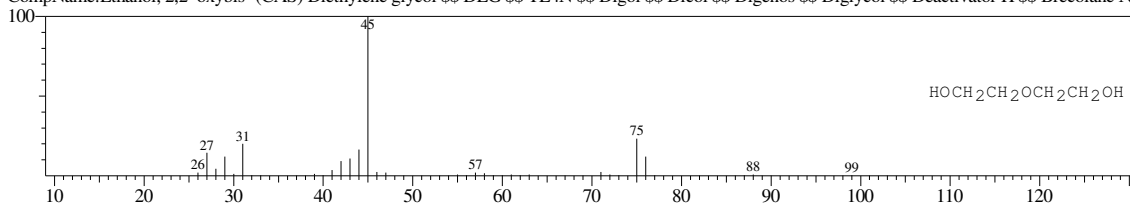

Hit#:2 Entry:8795 Library:WILEY7.LIB

SI:85 Formula:C4 H10 O3 CAS:111-46-6 MolWeight:106 RetIndex:0

CompName:Ethanol, 2,2'-oxybis- (CAS) Diethylene glycol \$\$ DEG \$\$ TL4N \$\$ Digol \$\$ Dicol \$\$ Digenos \$\$ Diglycol \$\$ Deactivator H \$\$ Brecolane NI

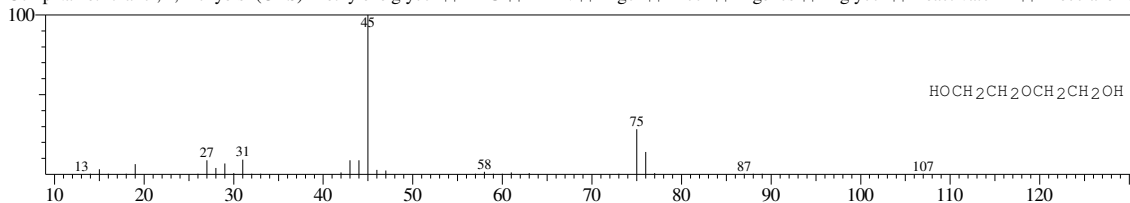

Hit#:3 Entry:8793 Library:WILEY7.LIB

SI:84 Formula:C4 H10 O3 CAS:111-46-6 MolWeight:106 RetIndex:0

CompName:Ethanol, 2,2'-oxybis- (CAS) Diethylene glycol \$\$ DEG \$\$ TL4N \$\$ Digol \$\$ Dicol \$\$ Digenos \$\$ Diglycol \$\$ Deactivator H \$\$ Brecolane NI

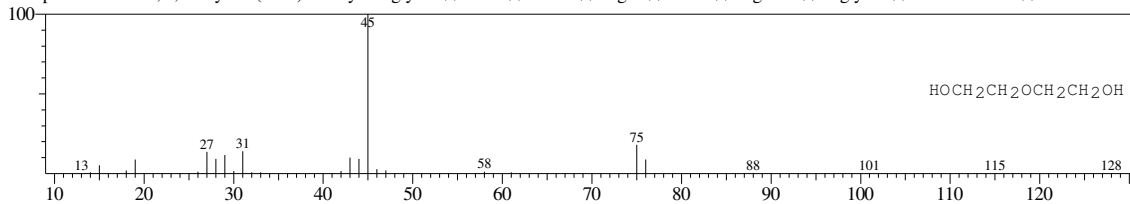

Hit#:4 Entry:8794 Library:WILEY7.LIB

SI:84 Formula:C4 H10 O3 CAS:111-46-6 MolWeight:106 RetIndex:0

CompName:Ethanol, 2,2'-oxybis- (CAS) Diethylene glycol \$\$ DEG \$\$ TL4N \$\$ Digol \$\$ Dicol \$\$ Digenos \$\$ Diglycol \$\$ Deactivator H \$\$ Brecolane NI

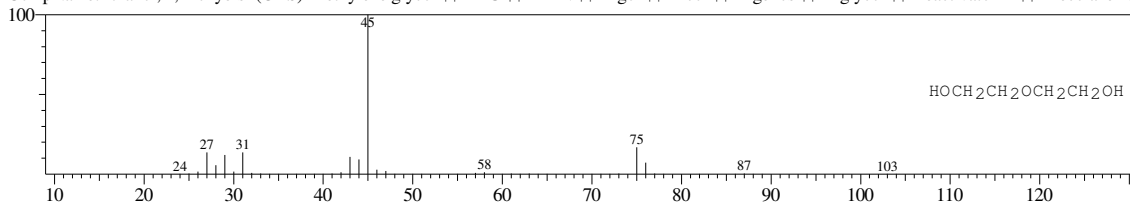

Hit#:5 Entry:8792 Library:WILEY7.LIB

SI:82 Formula:C4 H10 O3 CAS:111-46-6 MolWeight:106 RetIndex:0

CompName:Ethanol, 2,2'-oxybis- (CAS) Diethylene glycol \$\$ DEG \$\$ TL4N \$\$ Digol \$\$ Dicol \$\$ Digenos \$\$ Diglycol \$\$ Deactivator H \$\$ Brecolane NI

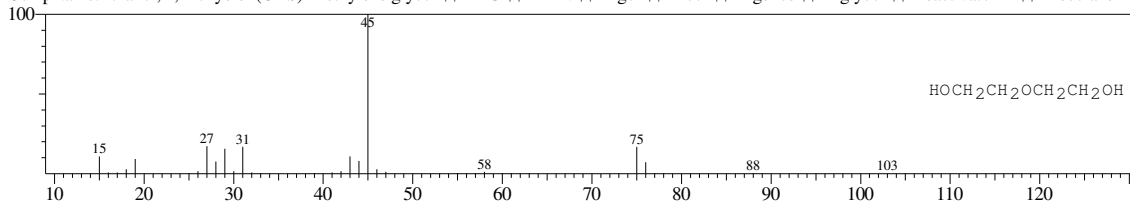

<< Target >>

Line#:4 R.Time:13.310(Scan#:1232) MassPeaks:17

RawMode:Averaged 13.300-13.320(1231-1233) BasePeak:69.05(3044)

BG Mode:Calc. from Peak Group 1 - Event 1

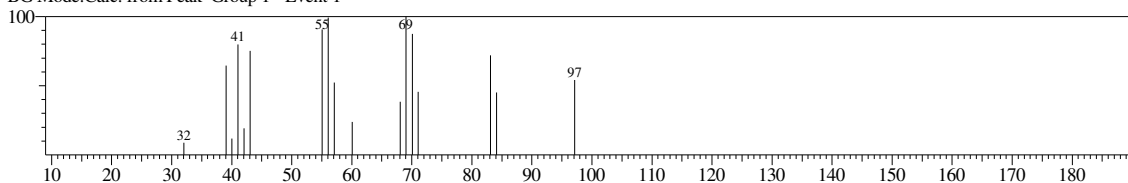

Hit#1 Entry:48011 Library:WILEY7.LIB

SI:87 Formula:C10 H22 O CAS:112-30-1 MolWeight:158 RetIndex:0

CompName:1-Decanol (CAS) Decyl alcohol \$\$ T 148 \$\$ Alfol 10 \$\$ n-Decanol \$\$ Sipol L 10 \$\$ Alcohol C10 \$\$ Alcohol C-10 \$\$ n-Decan-1-ol \$\$ Nonyl

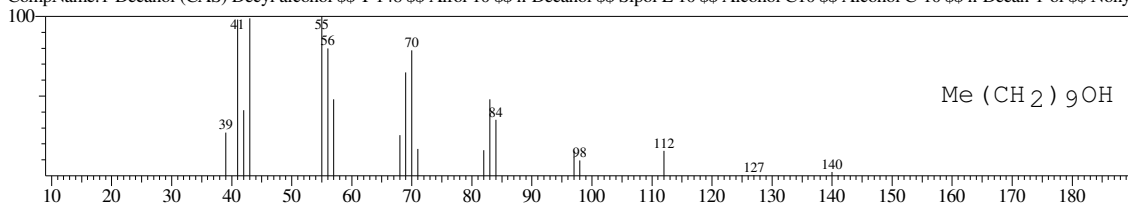

Hit#2 Entry:21982 Library:WILEY7.LIB

SI:87 Formula:C8 H18 O CAS:111-87-5 MolWeight:130 RetIndex:0

CompName:1-Octanol (CAS) Octilin \$\$ Alfol 8 \$\$ Sipol L8 \$\$ n-Octanol \$\$ n-Octan-1-ol \$\$ Octyl alcohol \$\$ Octanol \$\$ n-Octyl alcohol \$\$ Heptyl carbir

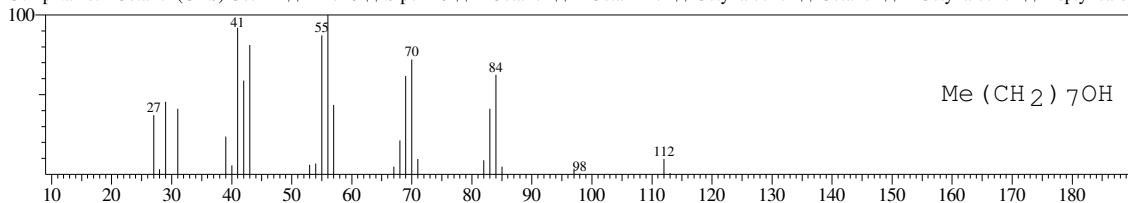

Hit#3 Entry:22026 Library:WILEY7.LIB

SI:87 Formula:C8 H18 O CAS:1653-40-3 MolWeight:130 RetIndex:0

CompName:1-Heptanol, 6-methyl- (CAS) 6-Methyl-1-heptanol \$\$

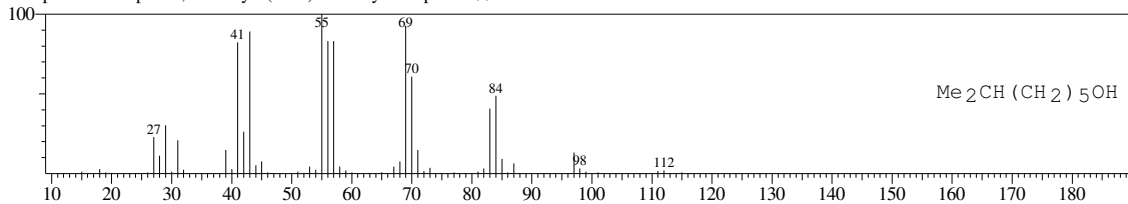

Hit#4 Entry:128962 Library:WILEY7.LIB

SI:86 Formula:C10 H17 F3 O2 CAS:2561-21-9 MolWeight:226 RetIndex:0

CompName:Acetic acid, trifluoro-, octyl ester (CAS) OCTYL TRIFLUOROACETATE \$\$ 1-Octyl trifluoroacetate \$\$ 1-Octanol, trifluoroacetate \$\$ Trifluor

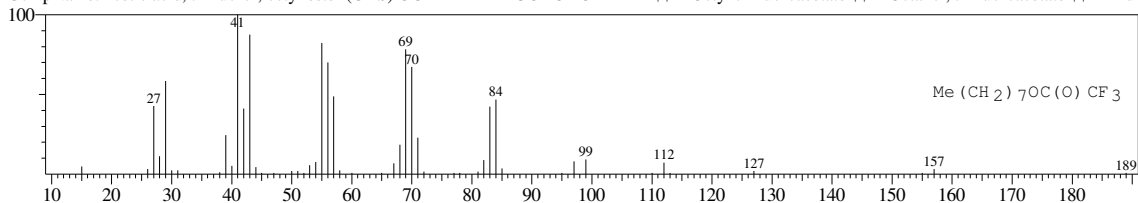

Hit#5 Entry:21983 Library:WILEY7.LIB

SI:86 Formula:C8 H18 O CAS:111-87-5 MolWeight:130 RetIndex:0

CompName:1-Octanol (CAS) Octilin \$\$ Alfol 8 \$\$ Sipol L8 \$\$ n-Octanol \$\$ n-Octan-1-ol \$\$ Octyl alcohol \$\$ Octanol \$\$ n-Octyl alcohol \$\$ Heptyl carbir

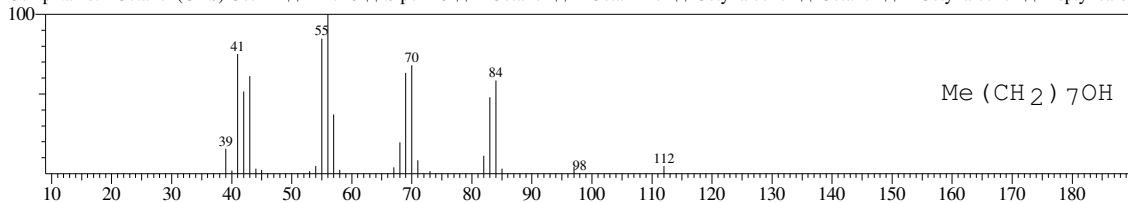

<< Target >>

Line#:5 R.Time:15.620(Scan#:1463) MassPeaks:15

RawMode:Averaged 15.610-15.630(1462-1464) BasePeak:87.05(1788)

BG Mode:Calc. from Peak Group 1 - Event 1

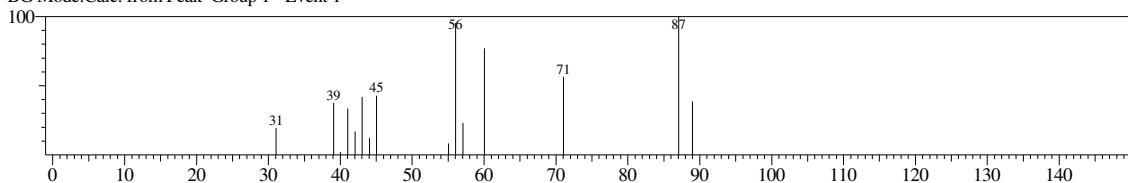

Hit#1 Entry:33282 Library:WILEY7.LIB

SI:78 Formula:C8 H16 O2 CAS:109-21-7 MolWeight:144 RetIndex:0

CompName:Butanoic acid, butyl ester (CAS) n-Butyl n-butyrate \$\$ Butyl butylate \$\$ Butyl butyrate \$\$ Butyl butanoate \$\$ 1-Butyl butyrate \$\$ n-Butyl buty

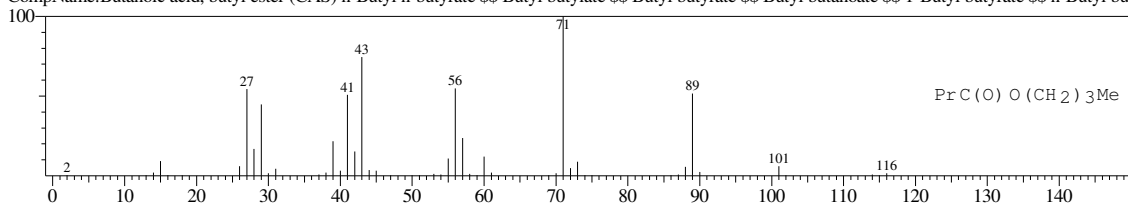

Hit#2 Entry:33284 Library:WILEY7.LIB

SI:78 Formula:C8 H16 O2 CAS:109-21-7 MolWeight:144 RetIndex:0

CompName:Butanoic acid, butyl ester (CAS) n-Butyl n-butyrate \$\$ Butyl butylate \$\$ Butyl butyrate \$\$ Butyl butanoate \$\$ 1-Butyl butyrate \$\$ n-Butyl buty

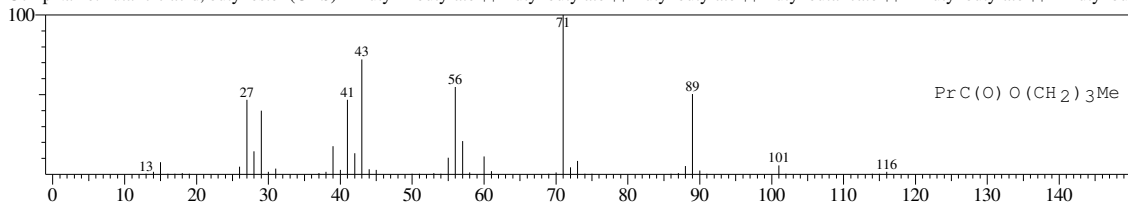

Hit#3 Entry:32669 Library:WILEY7.LIB

SI:77 Formula:C8 H16 O2 CAS:819-97-6 MolWeight:144 RetIndex:0

CompName:Butanoic acid, 1-methylpropyl ester (CAS) 2-BUTYL-N-BUTYRATE \$\$ sec-Butyl butyrate \$\$ Butyric acid, sec-butyl ester \$\$ sec-Butyl buta

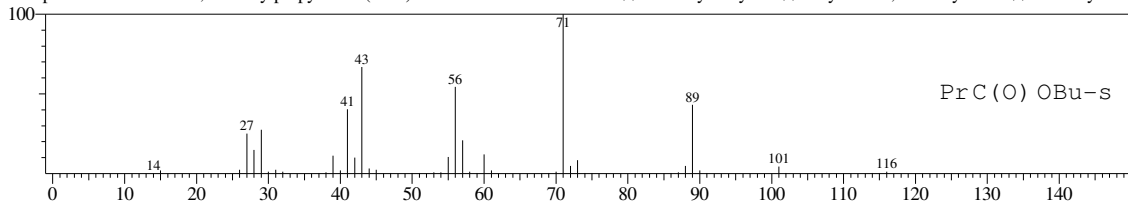

Hit#4 Entry:49469 Library:WILEY7.LIB

SI:77 Formula:C8 H16 O3 CAS:53605-94-0 MolWeight:160 RetIndex:0

CompName:Butanoic acid, 3-hydroxy-, butyl ester (CAS) Butyl 3-hydroxybutanoate \$\$ butyl .beta.-hydroxybutyrate \$\$ butyl -3-hydroxybutanoate \$\$ n-Bu

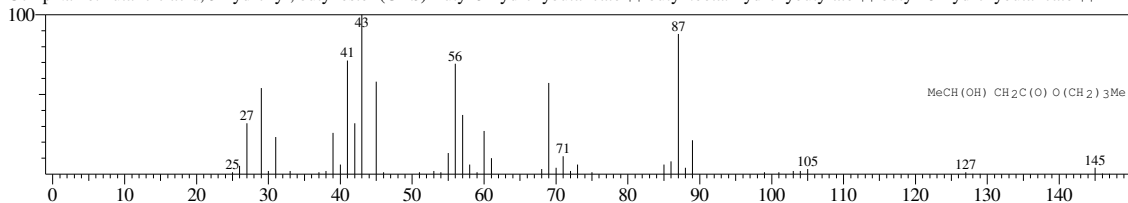

Hit#5 Entry:33283 Library:WILEY7.LIB

SI:77 Formula:C8 H16 O2 CAS:109-21-7 MolWeight:144 RetIndex:0

CompName:Butanoic acid, butyl ester (CAS) n-Butyl n-butyrate \$\$ Butyl butylate \$\$ Butyl butyrate \$\$ Butyl butanoate \$\$ 1-Butyl butyrate \$\$ n-Butyl buty

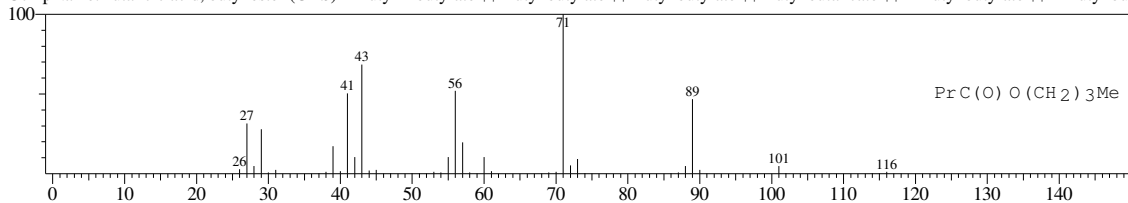

<< Target >>

Line#:6 R.Time:19.070(Scan#:1808) MassPeaks:21

RawMode:Averaged 19.060-19.080(1807-1809) BasePeak:57.05(2274)

BG Mode:Calc. from Peak Group 1 - Event 1

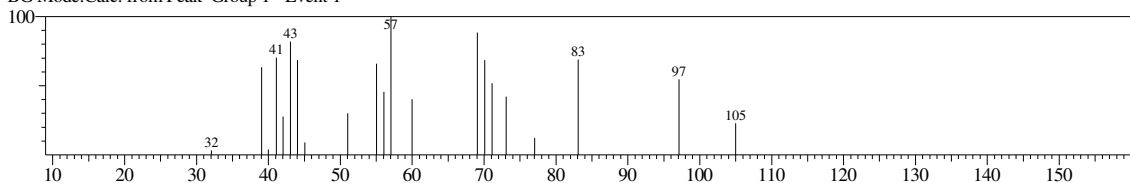

Hit#:1 Entry:22026 Library:WILEY7.LIB

SI:81 Formula:C<sub>8</sub>H<sub>18</sub>O CAS:1653-40-3 MolWeight:130 RetIndex:0

CompName:1-Heptanol, 6-methyl- (CAS) 6-Methyl-1-heptanol \$\$

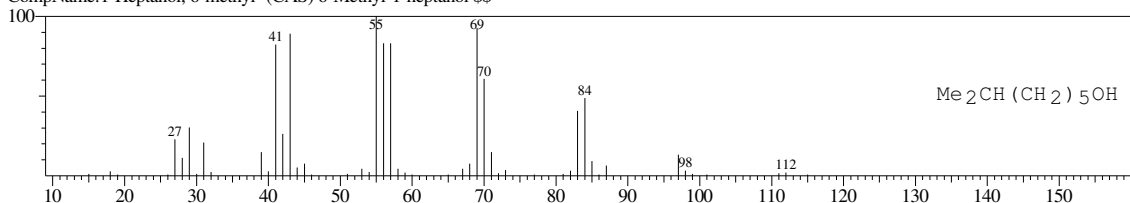

Hit#:2 Entry:22099 Library:WILEY7.LIB

SI:80 Formula:C<sub>8</sub>H<sub>18</sub>O CAS:26952-21-6 MolWeight:130 RetIndex:0

CompName:Isooctanol (CAS) Isooctyl alcohol \$\$

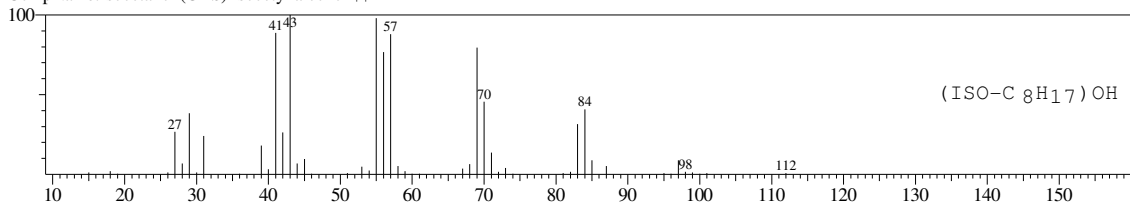

Hit#:3 Entry:22100 Library:WILEY7.LIB

SI:79 Formula:C<sub>8</sub>H<sub>18</sub>O CAS:26952-21-6 MolWeight:130 RetIndex:0

CompName:Isooctanol (CAS) Isooctyl alcohol \$\$

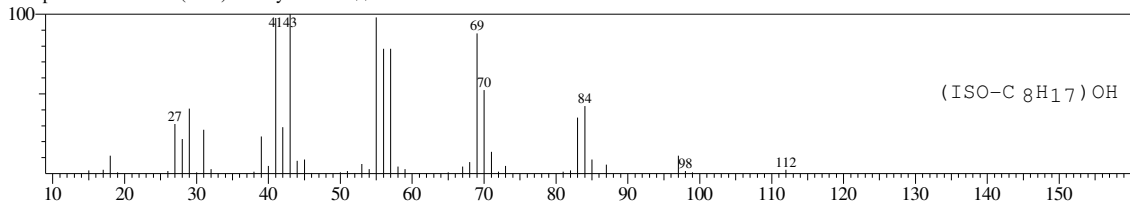

Hit#:4 Entry:47423 Library:WILEY7.LIB

SI:79 Formula:C<sub>10</sub>H<sub>22</sub>O CAS:1333-49-9 MolWeight:158 RetIndex:0

CompName:1-Octanol, dimethyl- (CAS) Dimethyl octanol \$\$

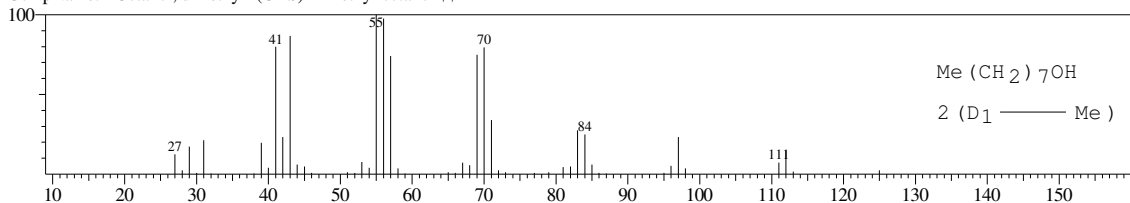

Hit#:5 Entry:62780 Library:WILEY7.LIB

SI:78 Formula:C<sub>11</sub>H<sub>24</sub>O CAS:33933-80-1 MolWeight:172 RetIndex:0

CompName:1-Nonanol, 4,8-dimethyl- (CAS) 4,8-Dimethyl-1-nonanol \$\$

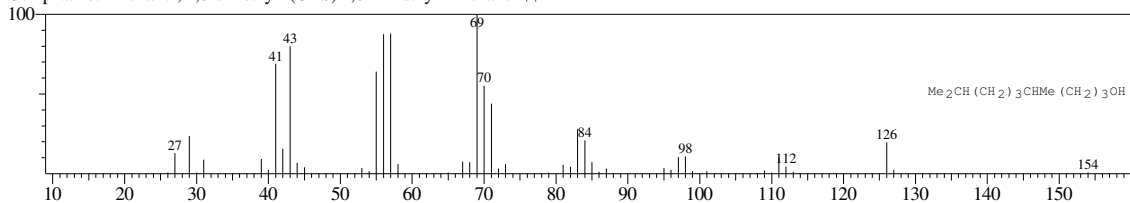



<< Target >>

Line#:7 R.Time:21.830(Scan#:2084) MassPeaks:15

RawMode:Averaged 21.820-21.840(2083-2085) BasePeak:71.10(1360)

BG Mode:Calc. from Peak Group 1 - Event 1

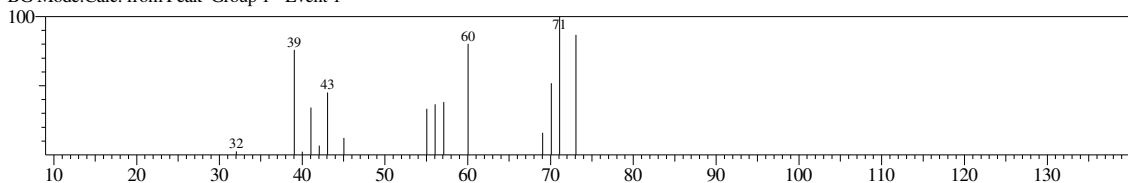

Hit#1 Entry:21722 Library:WILEY7.LIB

SI:79 Formula:C7 H14 O2 CAS:111-14-8 MolWeight:130 RetIndex:0

CompName:Heptanoic acid (CAS) Heptanoic acid \$\$ Enanthic acid \$\$ Heptylic acid \$\$ n-Heptanoic acid \$\$ Oenanthic acid \$\$ Enanthylic acid \$\$ n-Heptylic ac

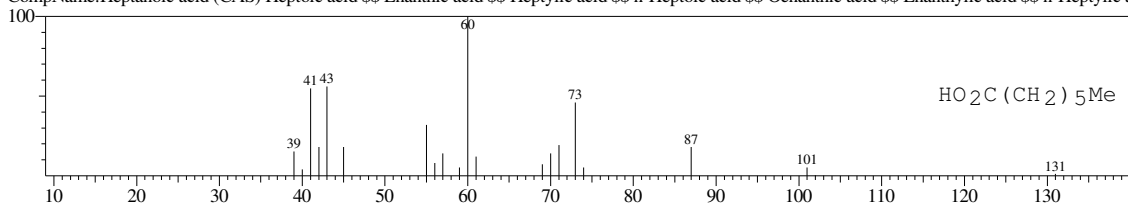

Hit#2 Entry:48054 Library:WILEY7.LIB

SI:78 Formula:C10 H22 O CAS:0-00-0 MolWeight:158 RetIndex:0

CompName:di-(3-methylbutyl) ether \$\$ DIISOAMYLETHER \$\$ bis(3-Methylbutyl) ether \$\$ di (3-methylbutyl) ether \$\$

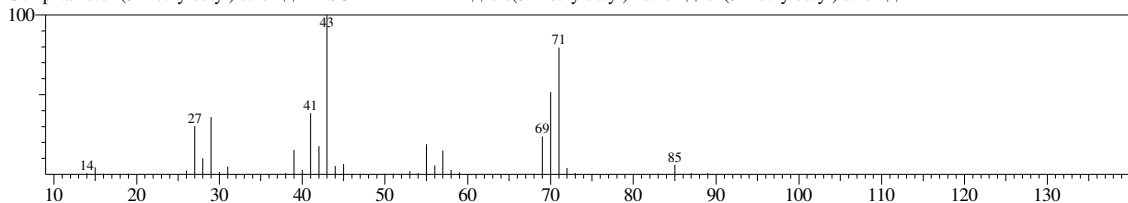

Hit#3 Entry:47875 Library:WILEY7.LIB

SI:77 Formula:C9 H18 O2 CAS:540-18-1 MolWeight:158 RetIndex:0

CompName:Butanoic acid, pentyl ester (CAS) Amyl butyrate \$\$ n-Amyl butyrate \$\$ Pentyl butyrate \$\$ 1-Pentyl butyrate \$\$ n-Pentyl n-butyrate \$\$ Butyric

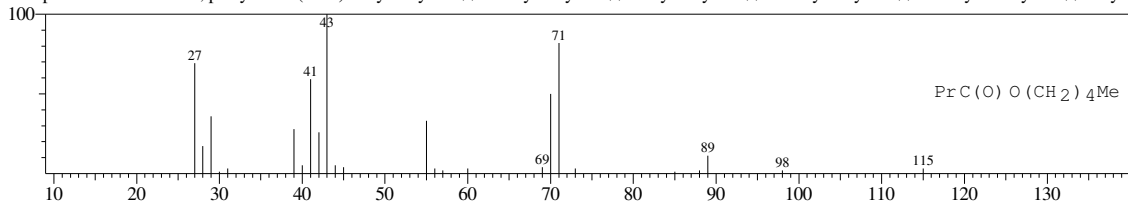

Hit#4 Entry:47942 Library:WILEY7.LIB

SI:77 Formula:C9 H18 O2 CAS:0-00-0 MolWeight:158 RetIndex:0

CompName:ISOAMYL BUTYRATE \$\$ Iso amyl n-butyrate \$\$

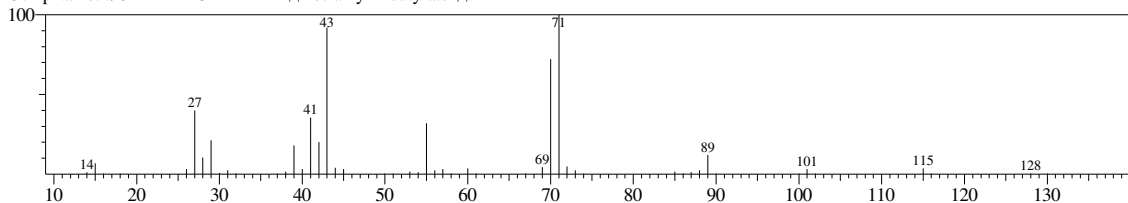

Hit#5 Entry:22524 Library:WILEY7.LIB

SI:77 Formula:C5 H8 O4 CAS:0-00-0 MolWeight:132 RetIndex:0

CompName:3,4-DIHYDROXY-5-METHYL-DIHYDRO-FURAN-2-ONE \$\$

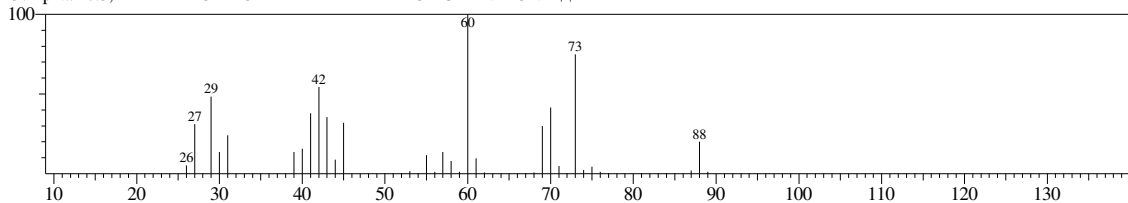

<< Target >>

Line#:8 R.Time:22.260(Scan#:2127) MassPeaks:19

RawMode:Averaged 22.250-22.270(2126-2128) BasePeak:56.05(1546)

BG Mode:Calc. from Peak Group 1 - Event 1

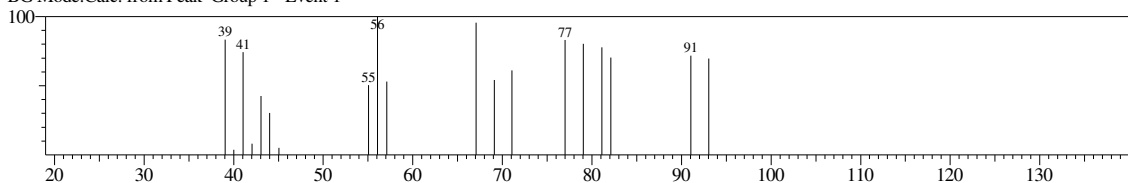

Hit#:1 Entry:18460 Library:WILEY7.LIB

SI:74 Formula:C8 H14 O CAS:162377-97-1 MolWeight:126 RetIndex:0

CompName:1-PENTANOL, 5-CYCLOPROPYLIDEN- \$\$

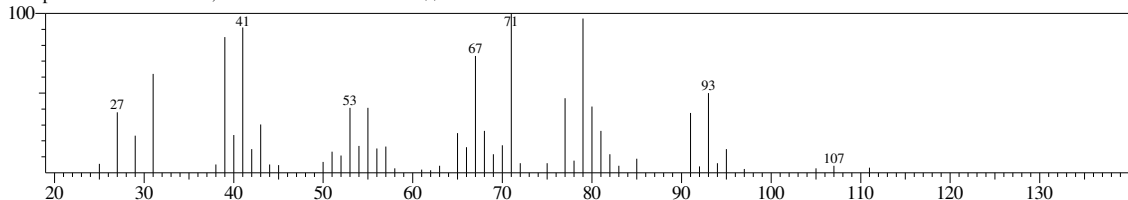

Hit#:2 Entry:42949 Library:WILEY7.LIB

SI:72 Formula:C10 H18 O CAS:15358-92-6 MolWeight:154 RetIndex:0

CompName:CIS-MYRTANOL \$\$

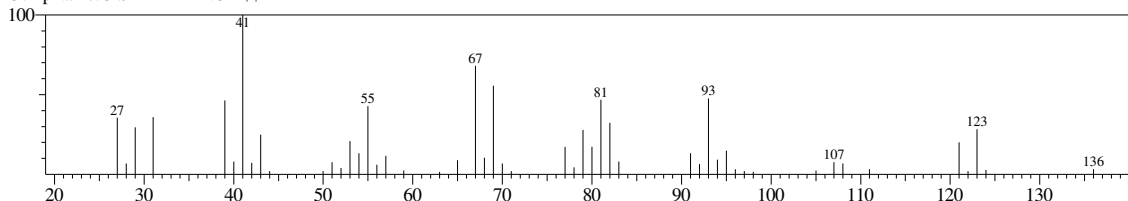

Hit#:3 Entry:29288 Library:WILEY7.LIB

SI:72 Formula:C9 H16 O CAS:0-00-0 MolWeight:140 RetIndex:0

CompName:1-PENTANOL, 5-(METHYLENCYCLOPROPYL)- \$\$

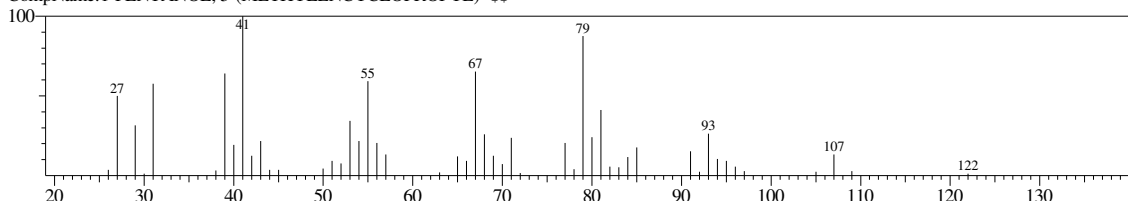

Hit#:4 Entry:28093 Library:WILEY7.LIB

SI:72 Formula:C10 H18 CAS:764-93-2 MolWeight:138 RetIndex:0

CompName:1-Decyne (CAS) Octylacetylene \$\$ 1-C10H18 \$\$ n-Octylacetylene \$\$

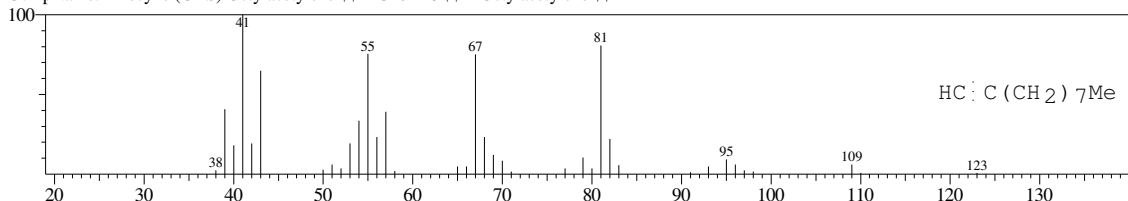

Hit#:5 Entry:28093 Library:WILEY7.LIB

SI:72 Formula:C10 H18 CAS:764-93-2 MolWeight:138 RetIndex:0

CompName:1-Decyne (CAS) Octylacetylene \$\$ 1-C10H18 \$\$ n-Octylacetylene \$\$

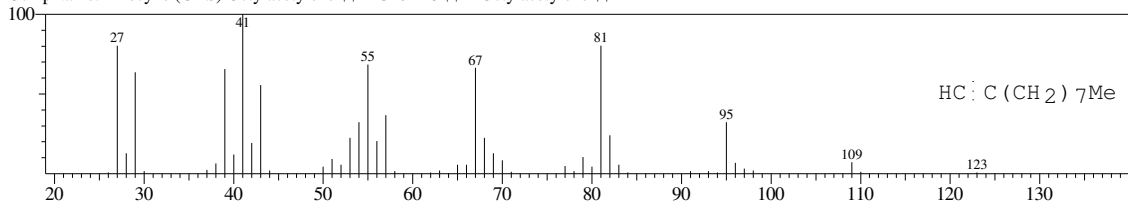

<< Target >>

Line#:9 R.Time:22.880(Scan#:2189) MassPeaks:21

RawMode:Averaged 22.870-22.890(2188-2190) BasePeak:91.05(6286)

BG Mode:Calc. from Peak Group 1 - Event 1

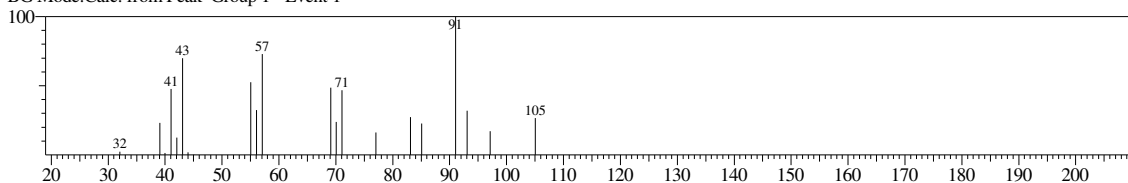

Hit#1 Entry:50274 Library:WILEY7.LIB

SI:88 Formula:C10 H11 N O CAS:1611-83-2 MolWeight:161 RetIndex:0

CompName:2-Propenamide, 2-methyl-N-phenyl- \$\$ N-Phenylmethacrylamide \$\$ N-PHENYL-METHACRYLIC ACID AMIDE \$\$ Acrylanilide, 2-methyl

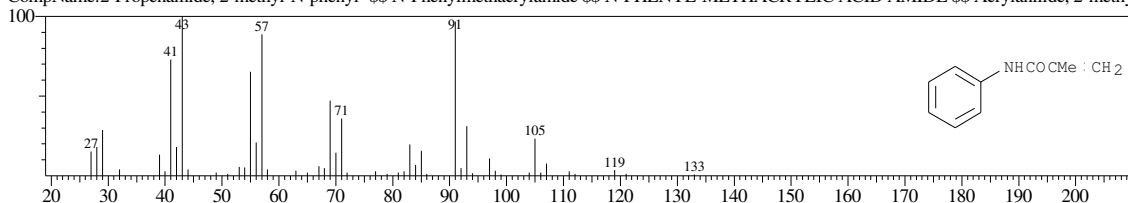

Hit#2 Entry:100592 Library:WILEY7.LIB

SI:88 Formula:C12 H25 CL CAS:112-52-7 MolWeight:204 RetIndex:0

CompName:Dodecane, 1-chloro- (CAS) 1-Chlorododecane \$\$ Lauryl chloride \$\$ Dodecyl chloride \$\$ n-Dodecyl chloride \$\$ 1-CHLORDODECAN \$\$

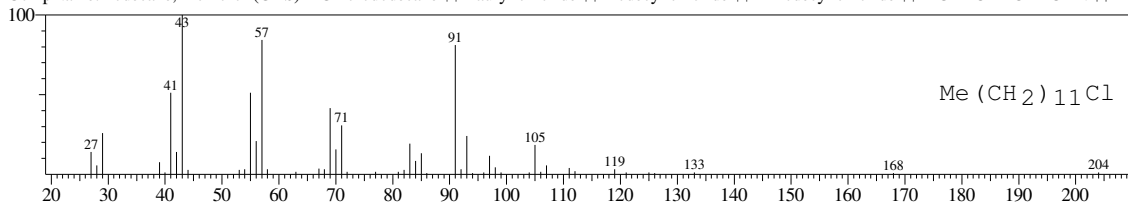

Hit#3 Entry:100591 Library:WILEY7.LIB

SI:88 Formula:C12 H25 CL CAS:112-52-7 MolWeight:204 RetIndex:0

CompName:Dodecane, 1-chloro- (CAS) 1-Chlorododecane \$\$ Lauryl chloride \$\$ Dodecyl chloride \$\$ n-Dodecyl chloride \$\$ 1-CHLORDODECAN \$\$

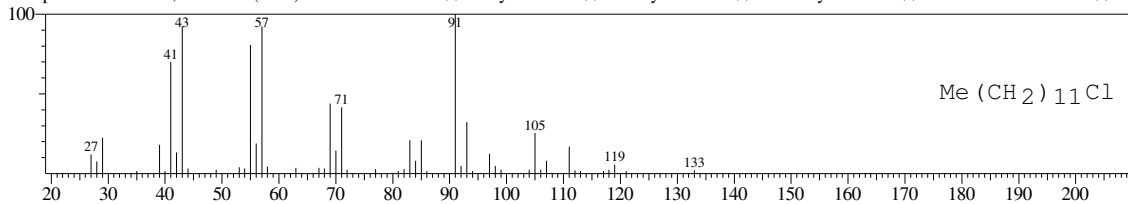

Hit#4 Entry:67131 Library:WILEY7.LIB

SI:87 Formula:C10 H21 CL CAS:1002-69-3 MolWeight:176 RetIndex:0

CompName:Decane, 1-chloro- (CAS) 1-Chlorodecane \$\$ Decyl chloride \$\$ n-Decyl chloride \$\$ 1-CHLORDECAN \$\$

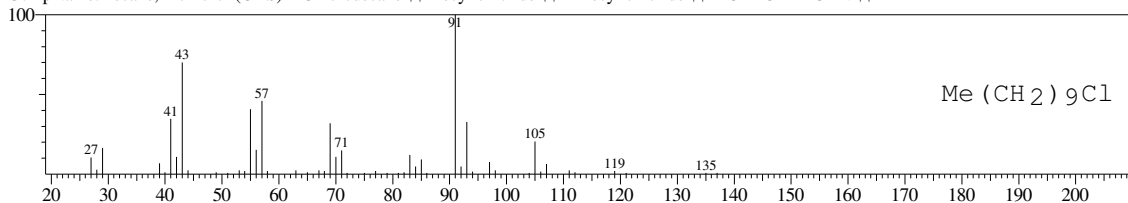

Hit#5 Entry:36436 Library:WILEY7.LIB

SI:86 Formula:C8 H17 CL CAS:111-85-3 MolWeight:148 RetIndex:0

CompName:Octane, 1-chloro- (CAS) 1-Chlorooctane \$\$ Octyl chloride \$\$ Capryl chloride \$\$ 1-Octyl chloride \$\$ n-Octyl chloride \$\$

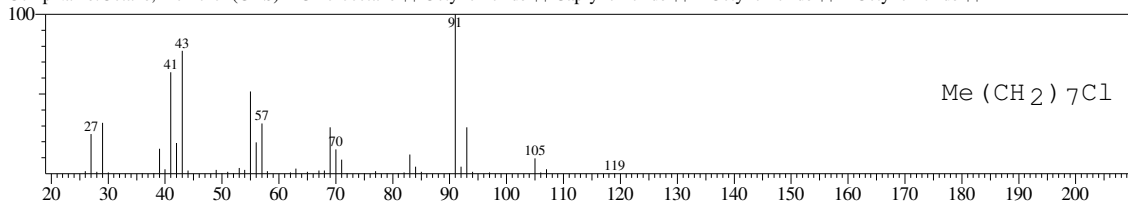

<< Target >>

Line#:10 R.Time:23.640(Scan#:2265) MassPeaks:13

RawMode:Averaged 23.630-23.650(2264-2266) BasePeak:89.05(2224)

BG Mode:Calc. from Peak Group 1 - Event 1

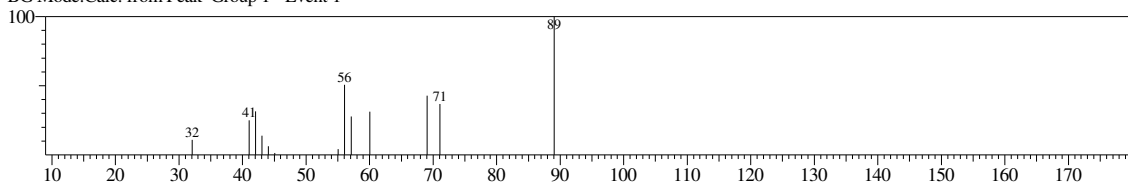

Hit#1 Entry:81206 Library:WILEY7.LIB

SI:79 Formula:C10 H20 O3 CAS:5393-81-7 MolWeight:188 RetIndex:0

CompName:Decanoic acid, 2-hydroxy- (CAS) 2-HYDROXY DECAHOIC ACID \$\$ 2-Hydroxydecanoic acid \$\$ .alpha.-Hydroxydecanoic acid \$\$ 2-Hydro

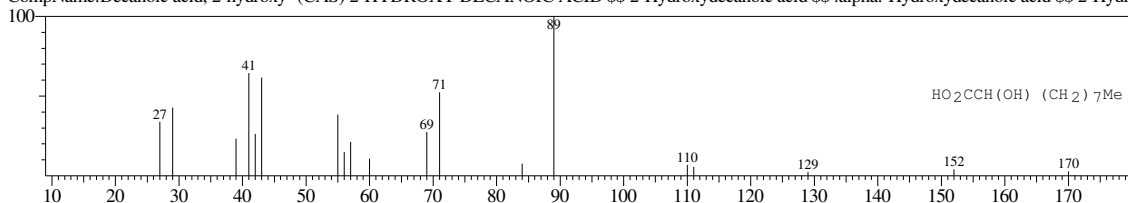

Hit#2 Entry:32750 Library:WILEY7.LIB

SI:77 Formula:C8 H16 O2 CAS:0-00-0 MolWeight:144 RetIndex:0

CompName:BUTYLISOBUTYRATE \$\$

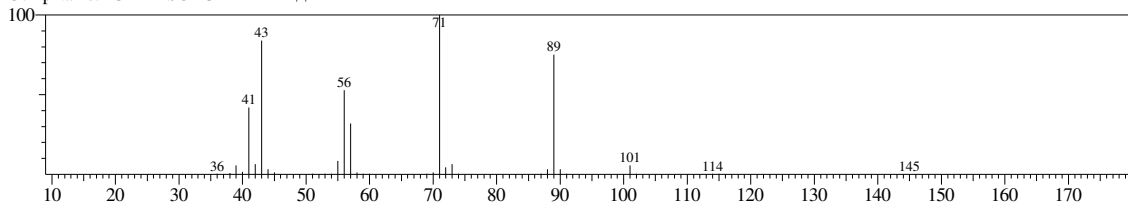

Hit#3 Entry:33285 Library:WILEY7.LIB

SI:76 Formula:C8 H16 O2 CAS:109-21-7 MolWeight:144 RetIndex:0

CompName:Butanoic acid, butyl ester (CAS) n-Butyl n-butyrate \$\$ Butyl butylate \$\$ Butyl butyrate \$\$ Butyl butanoate \$\$ 1-Butyl butyrate \$\$ n-Butyl buty

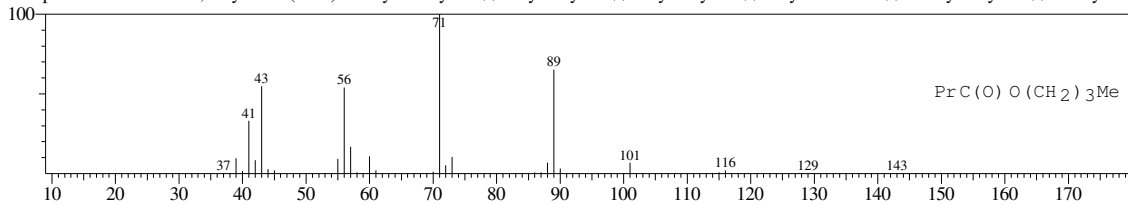

Hit#4 Entry:115689 Library:WILEY7.LIB

SI:75 Formula:C12 H24 O3 CAS:74367-31-0 MolWeight:216 RetIndex:0

CompName:Propanoic acid, 2-methyl-, 2-ethyl-3-hydroxyhexyl ester (CAS) 2-ETHYL-3-HYDROXYHEXYL ESTER OF 2-METHYL-PROPIONIC ACID

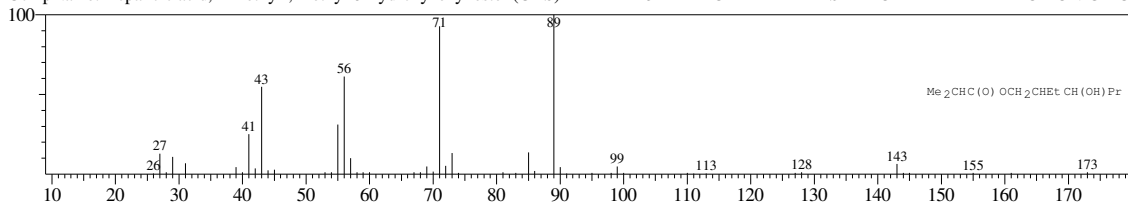

Hit#5 Entry:32669 Library:WILEY7.LIB

SI:75 Formula:C8 H16 O2 CAS:819-97-6 MolWeight:144 RetIndex:0

CompName:Butanoic acid, 1-methylpropyl ester (CAS) 2-BUTYL-N-BUTYRATE \$\$ sec-Butyl butyrate \$\$ Butyric acid, sec-butyl ester \$\$ sec-Butyl buta

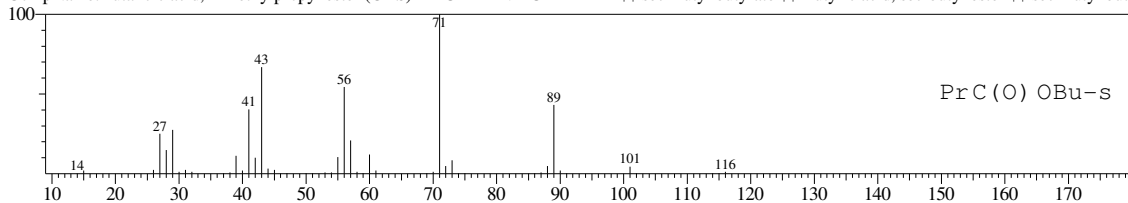

<< Target >>

Line#:11 R.Time:23.890(Scan#:2290) MassPeaks:31

RawMode:Averaged 23.880-23.900(2289-2291) BasePeak:55.05(15062)

BG Mode:Calc. from Peak Group 1 - Event 1

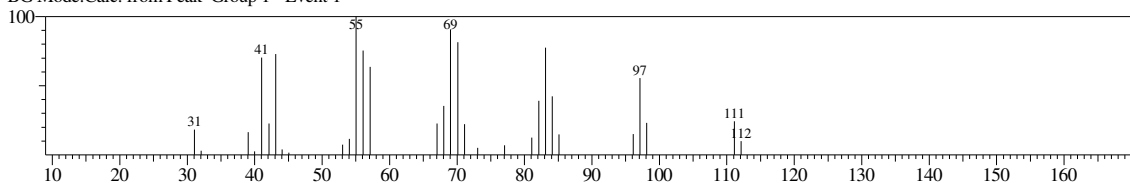

Hit#1 Entry:79256 Library:WILEY7.LIB

SI:94 Formula:C12 H26 O CAS:112-53-8 MolWeight:186 RetIndex:0

CompName:1-Dodecanol (CAS) n-Dodecanol \$\$ CO 12 \$\$ S 1298 \$\$ Dodecanol \$\$ Pisol \$\$ Alfol 12 \$\$ Sipol L 12 \$\$ Lauryl 24 \$\$ Siponol 25 \$\$ Siponol

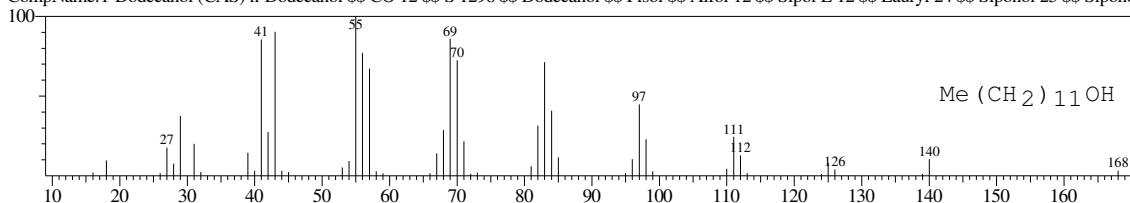

Hit#2 Entry:79259 Library:WILEY7.LIB

SI:94 Formula:C12 H26 O CAS:112-53-8 MolWeight:186 RetIndex:0

CompName:1-Dodecanol (CAS) n-Dodecanol \$\$ CO 12 \$\$ S 1298 \$\$ Dodecanol \$\$ Pisol \$\$ Alfol 12 \$\$ Sipol L 12 \$\$ Lauryl 24 \$\$ Siponol 25 \$\$ Siponol

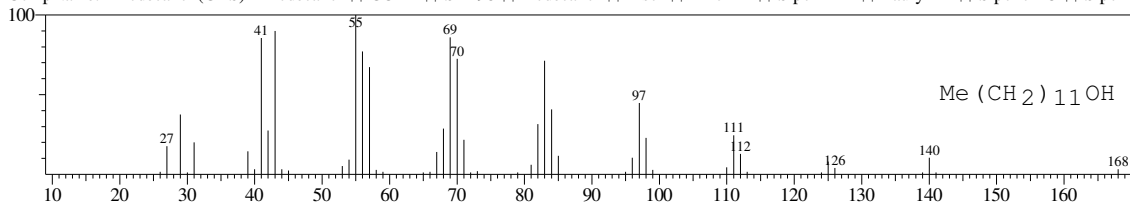

Hit#3 Entry:79260 Library:WILEY7.LIB

SI:93 Formula:C12 H26 O CAS:112-53-8 MolWeight:186 RetIndex:0

CompName:1-Dodecanol (CAS) n-Dodecanol \$\$ CO 12 \$\$ S 1298 \$\$ Dodecanol \$\$ Pisol \$\$ Alfol 12 \$\$ Sipol L 12 \$\$ Lauryl 24 \$\$ Siponol 25 \$\$ Siponol

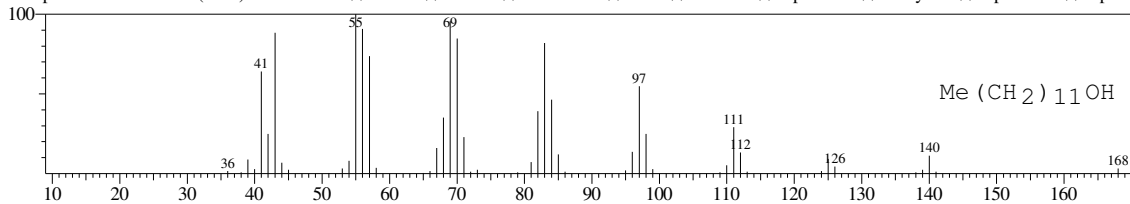

Hit#4 Entry:63446 Library:WILEY7.LIB

SI:93 Formula:C11 H24 O CAS:112-42-5 MolWeight:172 RetIndex:0

CompName:1-Undecanol (CAS) n-Undecanol \$\$ 1-Hendecanol \$\$ n-Undecan-1-ol \$\$ Undecyl alcohol \$\$ Hendecyl alcohol \$\$ n-Undecyl alcohol \$\$ Hend

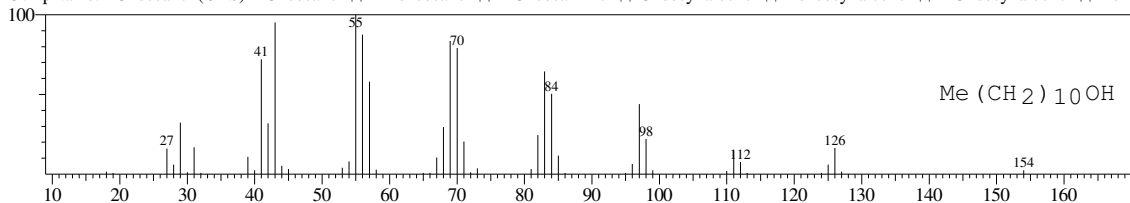

Hit#5 Entry:79265 Library:WILEY7.LIB

SI:93 Formula:C12 H26 O CAS:112-53-8 MolWeight:186 RetIndex:0

CompName:1-Dodecanol (CAS) n-Dodecanol \$\$ CO 12 \$\$ S 1298 \$\$ Dodecanol \$\$ Pisol \$\$ Alfol 12 \$\$ Sipol L 12 \$\$ Lauryl 24 \$\$ Siponol 25 \$\$ Siponol

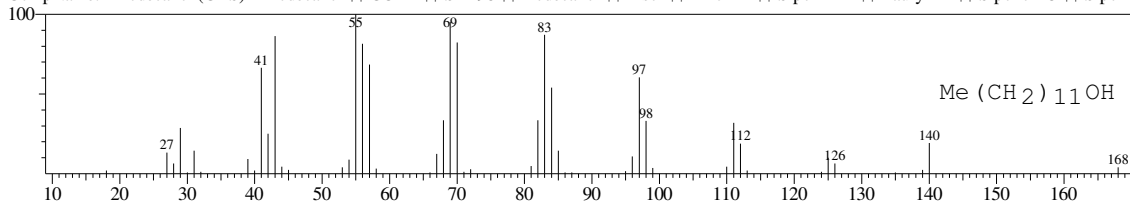

<< Target >>

Line#:12 R.Time:25.570(Scan#:2458) MassPeaks:12

RawMode:Averaged 25.560-25.580(2457-2459) BasePeak:57.10(1639)

BG Mode:Calc. from Peak Group 1 - Event 1

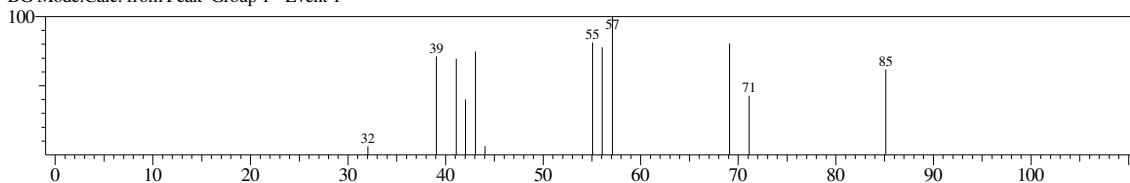

Hit#1 Entry:95463 Library:WILEY7.LIB

SI:83 Formula:C13 H28 O CAS:0-00-0 MolWeight:200 RetIndex:0

CompName:2-Propyldecan-1-ol \$\$

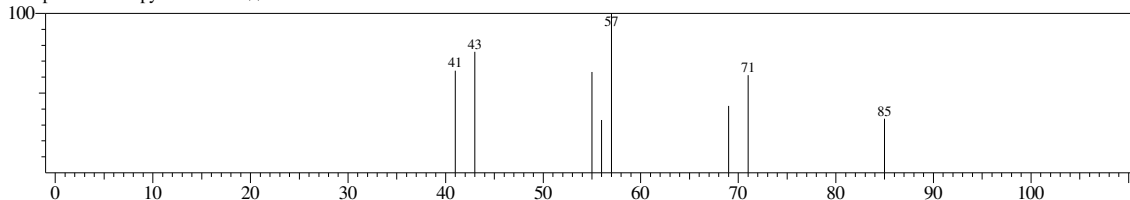

Hit#2 Entry:7984 Library:WILEY7.LIB

SI:83 Formula:C6 H14 O CAS:589-35-5 MolWeight:102 RetIndex:0

CompName:1-Pentanol, 3-methyl- (CAS) 3-Methyl-1-pentanol \$\$ 3-Methylpentanol \$\$ 2-Ethyl-4-butanol \$\$ 3-Ethyl-1-butanol \$\$ 3-methyl 1-pentanol \$\$ :

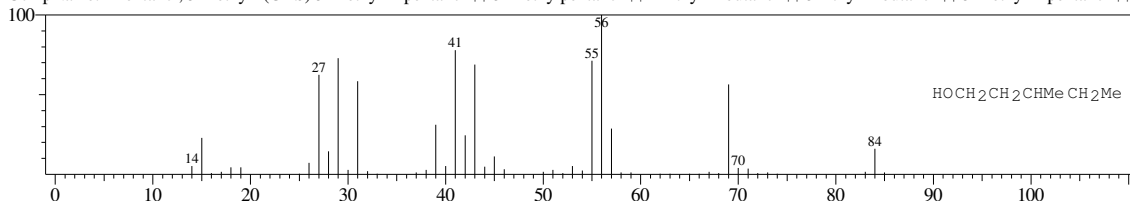

Hit#3 Entry:7227 Library:WILEY7.LIB

SI:82 Formula:C7 H16 CAS:565-59-3 MolWeight:100 RetIndex:0

CompName:2,3-Dimethylpentane (CAS) 2,3-Dimethylpentane \$\$ 3,4-Dimethylpentane \$\$

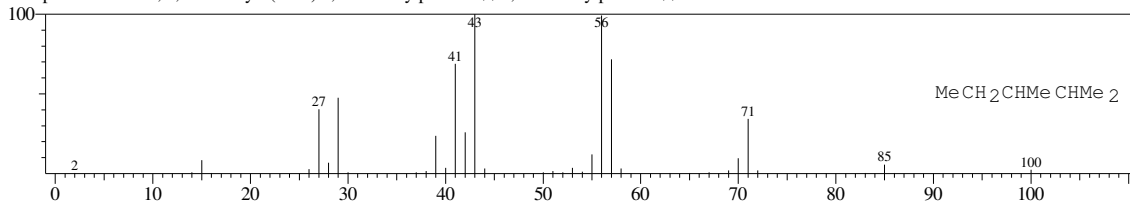

Hit#4 Entry:7225 Library:WILEY7.LIB

SI:82 Formula:C7 H16 CAS:565-59-3 MolWeight:100 RetIndex:0

CompName:2,3-Dimethylpentane (CAS) 2,3-Dimethylpentane \$\$ 3,4-Dimethylpentane \$\$

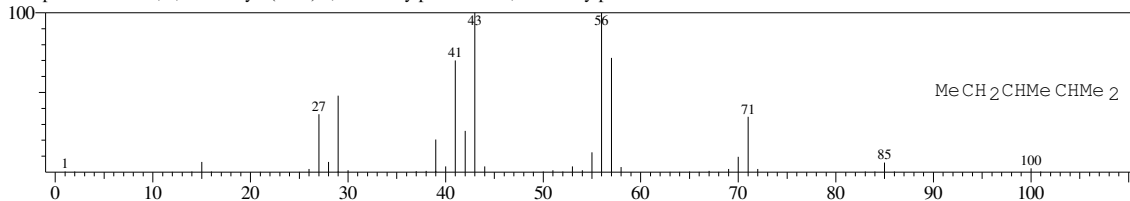

Hit#5 Entry:7236 Library:WILEY7.LIB

SI:82 Formula:C7 H16 CAS:464-06-2 MolWeight:100 RetIndex:0

CompName:Butane, 2,2,3-trimethyl- (CAS) 2,2,3-Trimethylbutane \$\$ Triptan \$\$ Triptane \$\$

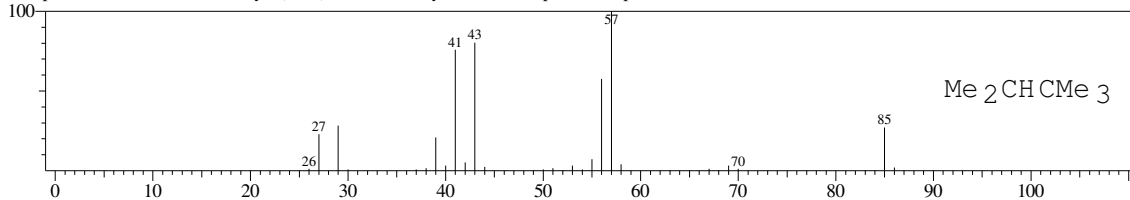

<< Target >>

Line#:13 R.Time:26.870(Scan#:2588) MassPeaks:32

RawMode:Averaged 26.860-26.880(2587-2589) BasePeak:73.05(9316)

BG Mode:Calc. from Peak Group 1 - Event 1

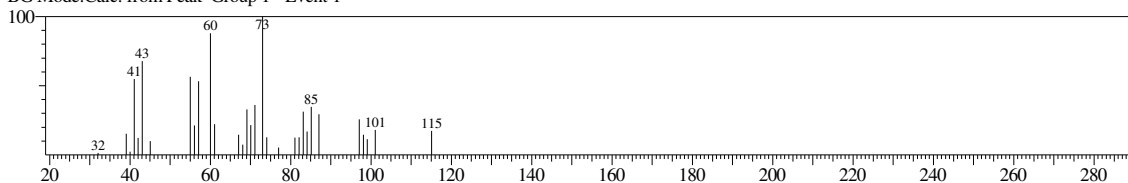

Hit#1 Entry:164469 Library:WILEY7.LIB

SI:87 Formula:C16 H32 O2 CAS:57-10-3 MolWeight:256 RetIndex:0

CompName:Hexadecanoic acid (CAS) Palmitic acid \$\$ Palmitic acid \$\$ n-Hexadecoic acid \$\$ n-Hexadecanoic acid \$\$ Pentadecanecarboxylic acid \$\$ 1-

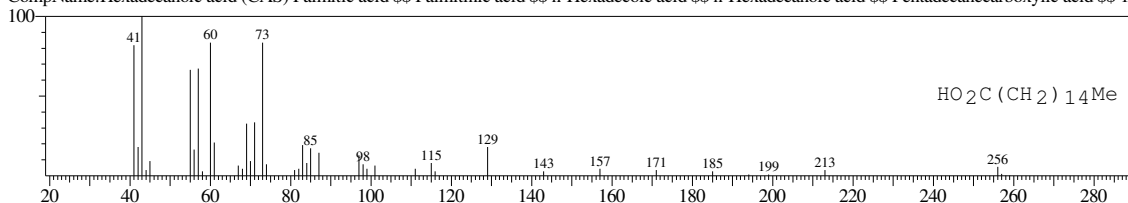

Hit#2 Entry:198305 Library:WILEY7.LIB

SI:87 Formula:C16 H33 N O3 CAS:120-40-1 MolWeight:287 RetIndex:0

CompName:Dodecanamide, N,N-bis(2-hydroxyethyl)- \$\$ Bis(2-hydroxyethyl)lauramide \$\$ LDA \$\$ LDE \$\$ Clindrol Superamide 100L \$\$ Clindrol 200L \$

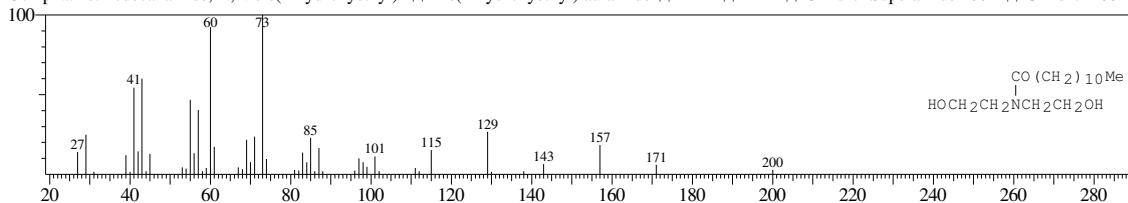

Hit#3 Entry:131451 Library:WILEY7.LIB

SI:87 Formula:C14 H28 O2 CAS:544-63-8 MolWeight:228 RetIndex:0

CompName:Tetradecanoic acid (CAS) Myristic acid \$\$ MYRISTINIC ACID \$\$ n-Tetradecanoic acid \$\$ neo-Fat 14 \$\$ Univol U 316S \$\$ n-Tetradecoic ac

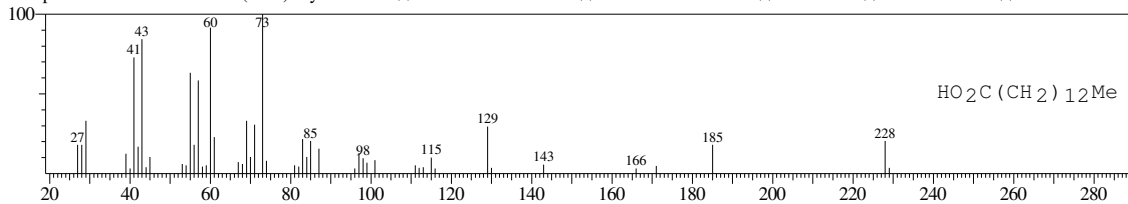

Hit#4 Entry:195573 Library:WILEY7.LIB

SI:87 Formula:C18 H36 O2 CAS:57-11-4 MolWeight:284 RetIndex:0

CompName:Octadecanoic acid (CAS) Stearic acid \$\$ n-Octadecanoic acid \$\$ PD 185 \$\$ NAA 173 \$\$ Vanicol \$\$ Kam 3000 \$\$ Kam 1000 \$\$ Kam 2000 \$

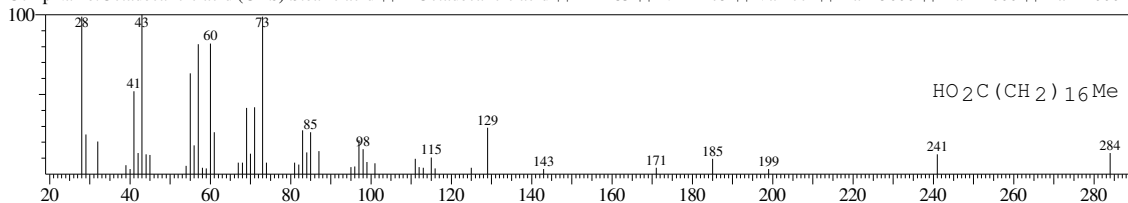

Hit#5 Entry:180843 Library:WILEY7.LIB

SI:87 Formula:C15 H29 N O3 CAS:97-78-9 MolWeight:271 RetIndex:0

CompName:Glycine, N-methyl-N-(1-oxododecyl)- \$\$ Sarcosine, N-lauroyl- \$\$ Hamposyl I \$\$ Lauroyl sarcosine \$\$ Lauroylsarcosine \$\$ Maprosyl I \$\$ N-I

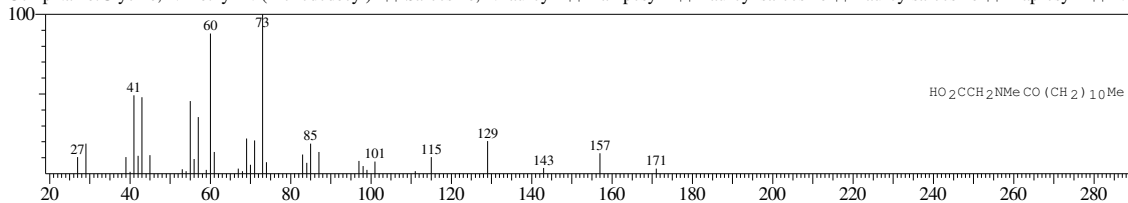

<< Target >>

Line#:14 R.Time:27.330(Scan#:2634) MassPeaks:20

RawMode:Averaged 27.320-27.340(2633-2635) BasePeak:83.10(1251)

BG Mode:Calc. from Peak Group 1 - Event 1

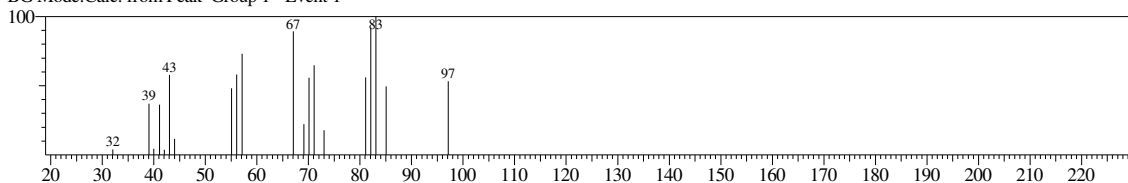

Hit#:1 Entry:175672 Library:WILEY7.LIB

SI:79 Formula:C19 H38 CAS:13151-89-8 MolWeight:266 RetIndex:0

CompName:TRIDECANE, 4-CYCLOHEXYL- \$\$

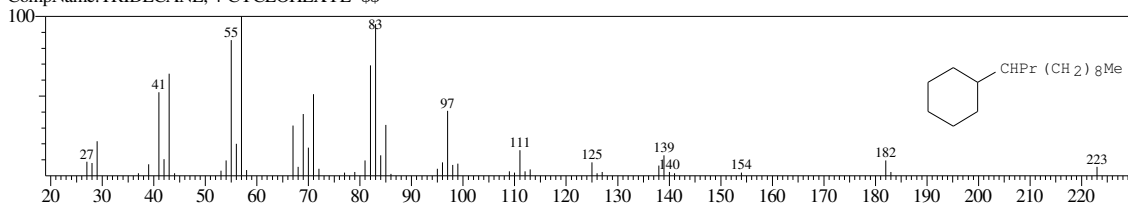

Hit#:2 Entry:126354 Library:WILEY7.LIB

SI:79 Formula:C16 H32 CAS:13151-75-2 MolWeight:224 RetIndex:0

CompName:Decane 4-cyclohexyl-, 4-cyclohexyl- (CAS)

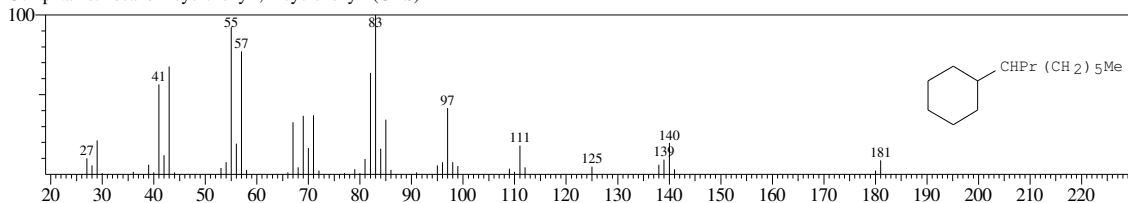

Hit#:3 Entry:313094 Library:WILEY7.LIB

SI:78 Formula:C30 H58 O4 CAS:2432-89-5 MolWeight:482 RetIndex:0

CompName:Decanedioic acid, didecyl ester \$\$ Didecyl sebacate \$\$

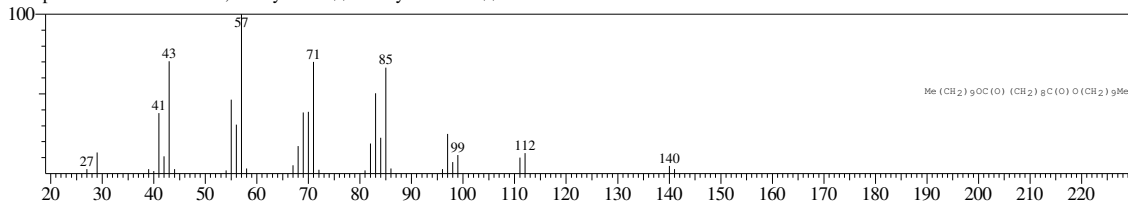

Hit#:4 Entry:143550 Library:WILEY7.LIB

SI:78 Formula:C17 H34 CAS:13151-80-9 MolWeight:238 RetIndex:0

CompName:Undecane 5-cyclohexyl- (CAS) UNDECANE, 5-CYCLOHEXYL- \$\$

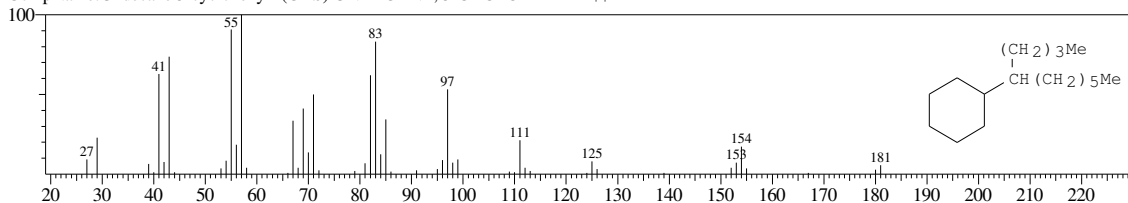

Hit#:5 Entry:159900 Library:WILEY7.LIB

SI:78 Formula:C18 H36 CAS:13151-84-3 MolWeight:252 RetIndex:0

CompName:DODECANE, 4-CYCLOHEXYL- \$\$

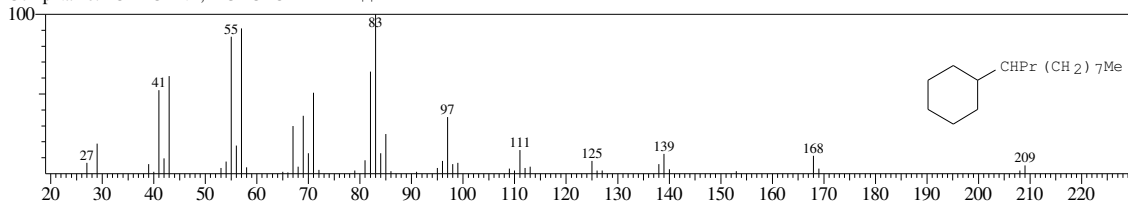



<< Target >>

Line#:15 R.Time:27.720(Scan#:2673) MassPeaks:14

RawMode:Averaged 27.710-27.730(2672-2674) BasePeak:58.10(1447)

BG Mode:Calc. from Peak Group 1 - Event 1

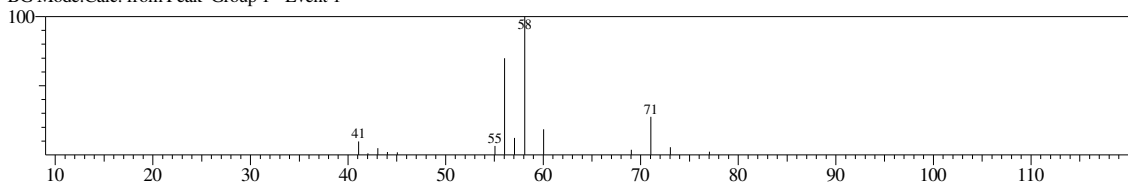

Hit#:1 Entry:11873 Library:WILEY7.LIB

SI:83 Formula:C4 H6 N2 O2 CAS:0-00-0 MolWeight:114 RetIndex:0

CompName:1,3-Dimethyl-1,3-dispeptidin-2,4-dione \$\$

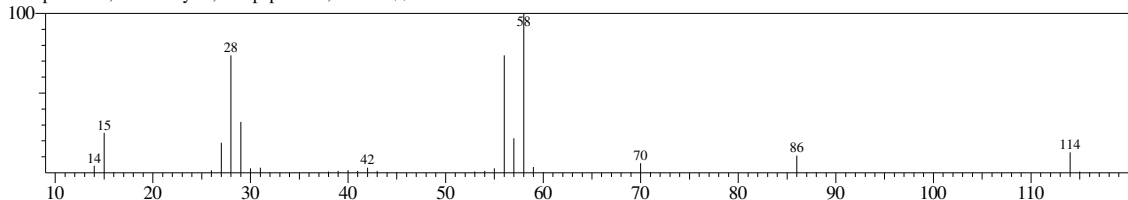

Hit#:2 Entry:4263 Library:WILEY7.LIB

SI:83 Formula:C4 H11 N O CAS:96-20-8 MolWeight:89 RetIndex:0

CompName:1-Butanol, 2-amino- (CAS) 2-Amino-1-butanol \$\$ 2-Aminobutyl alcohol \$\$ 1-Hydroxy-2-butylamine \$\$ 2-Amino-1-hydroxybutane \$\$ 1-(Hyd

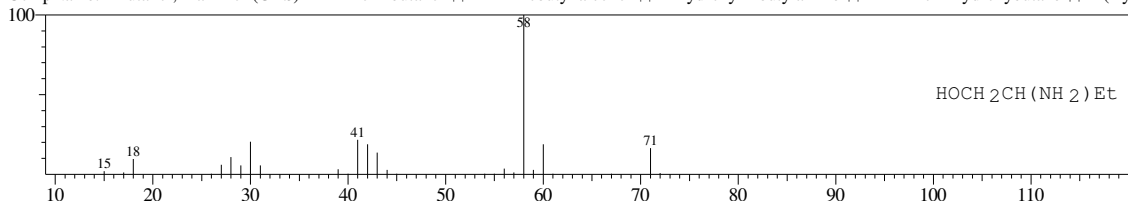

Hit#:3 Entry:46719 Library:WILEY7.LIB

SI:81 Formula:C8 H15 N O2 CAS:2867-47-2 MolWeight:157 RetIndex:0

CompName:2-Propenoic acid, 2-methyl-, 2-(dimethylamino)ethyl ester (CAS) DIMETHYL AMINOETHYL METHACRYLATE \$\$ (Dimethylamino)ethyl

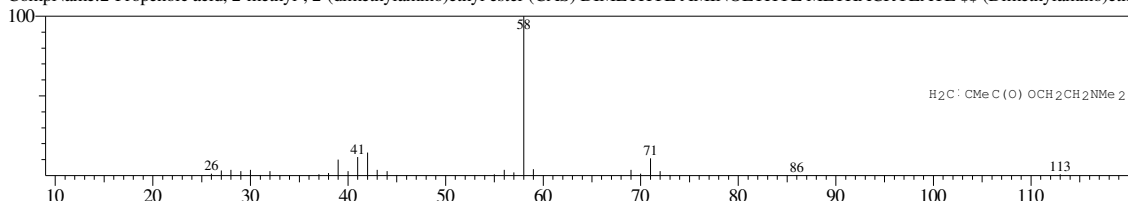

Hit#:4 Entry:4261 Library:WILEY7.LIB

SI:80 Formula:C4 H11 N O CAS:96-20-8 MolWeight:89 RetIndex:0

CompName:1-Butanol, 2-amino- (CAS) 2-Amino-1-butanol \$\$ 2-Aminobutyl alcohol \$\$ 1-Hydroxy-2-butylamine \$\$ 2-Amino-1-hydroxybutane \$\$ 1-(Hyd

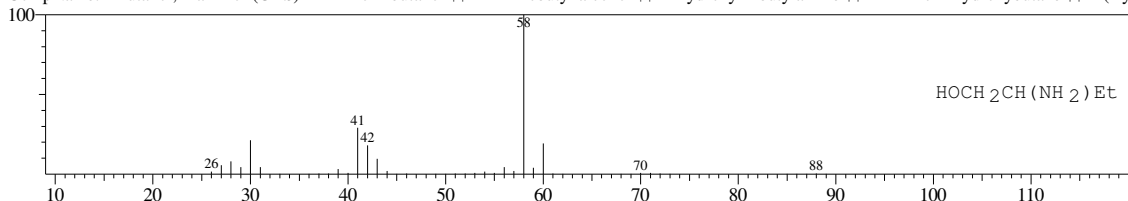

Hit#:5 Entry:21011 Library:WILEY7.LIB

SI:80 Formula:C8 H19 N CAS:107-45-9 MolWeight:129 RetIndex:0

CompName:2-Pentanamine, 2,4,4-trimethyl- (CAS) tert-Octylamine \$\$ 1,1,3,3-Tetramethylbutylamine \$\$ 2,4,4-Trimethyl-2-pentylamine \$\$ Butylamine, 1-

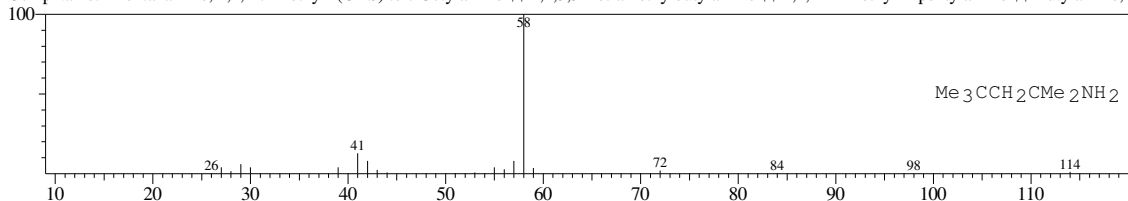

<< Target >>

Line#:16 R.Time:27.900(Scan#:2691) MassPeaks:19

RawMode:Averaged 27.890-27.910(2690-2692) BasePeak:91.05(3084)

BG Mode:Calc. from Peak Group 1 - Event 1

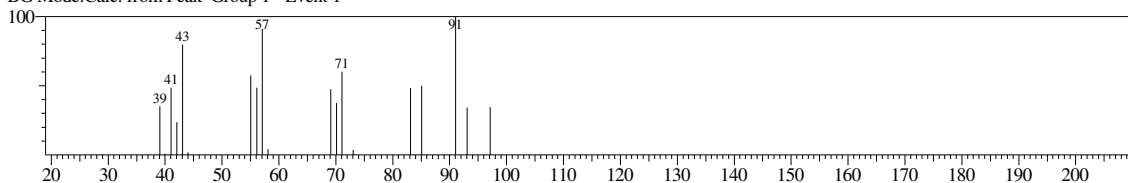

Hit#1 Entry:50274 Library:WILEY7.LIB

SI:85 Formula:C10 H11 N O CAS:1611-83-2 MolWeight:161 RetIndex:0

CompName:2-Propenamide, 2-methyl-N-phenyl- \$\$ N-Phenylmethacrylamide \$\$ N-PHENYL-METHACRYLIC ACID AMIDE \$\$ Acrylanilide, 2-methyl



Hit#2 Entry:100591 Library:WILEY7.LIB

SI:85 Formula:C12 H25 Cl CAS:112-52-7 MolWeight:204 RetIndex:0

CompName:Dodecane, 1-chloro- (CAS) 1-Chlorododecane \$\$ Lauryl chloride \$\$ Dodecyl chloride \$\$ n-Dodecyl chloride \$\$ 1-CHLORDODECAN \$\$

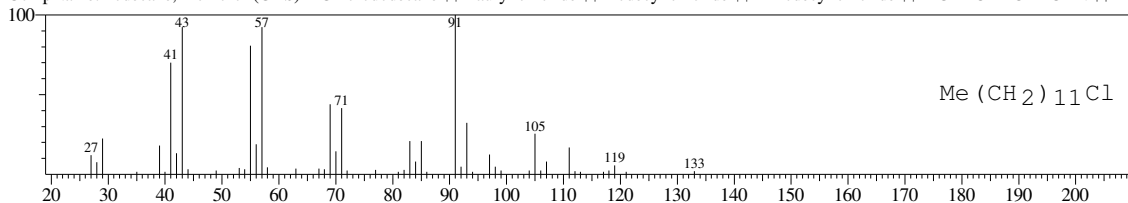

Hit#3 Entry:100592 Library:WILEY7.LIB

SI:85 Formula:C12 H25 Cl CAS:112-52-7 MolWeight:204 RetIndex:0

CompName:Dodecane, 1-chloro- (CAS) 1-Chlorododecane \$\$ Lauryl chloride \$\$ Dodecyl chloride \$\$ n-Dodecyl chloride \$\$ 1-CHLORDODECAN \$\$

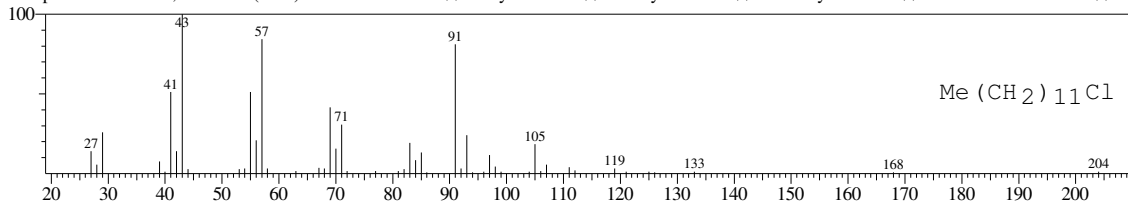

Hit#4 Entry:67134 Library:WILEY7.LIB

SI:84 Formula:C10 H21 Cl CAS:1002-69-3 MolWeight:176 RetIndex:0

CompName:Decane, 1-chloro- (CAS) 1-Chlorodecane \$\$ Decyl chloride \$\$ n-Decyl chloride \$\$ 1-CHLORDECAN \$\$

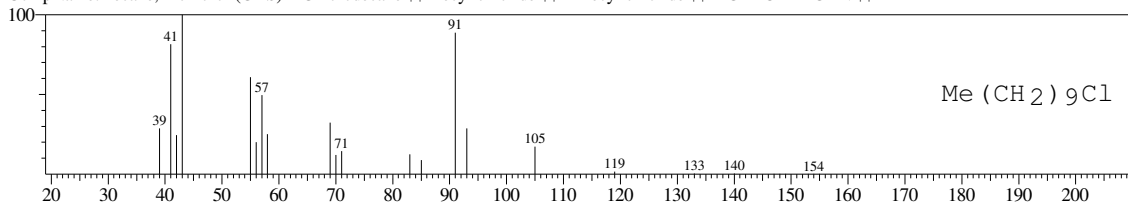

Hit#5 Entry:100593 Library:WILEY7.LIB

SI:84 Formula:C12 H25 Cl CAS:112-52-7 MolWeight:204 RetIndex:0

CompName:Dodecane, 1-chloro- (CAS) 1-Chlorododecane \$\$ Lauryl chloride \$\$ Dodecyl chloride \$\$ n-Dodecyl chloride \$\$ 1-CHLORDODECAN \$\$

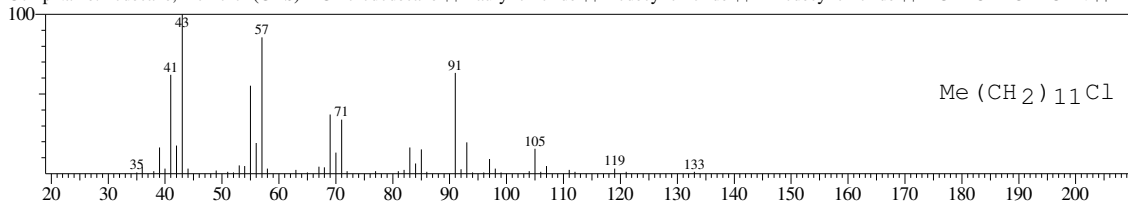

<< Target >>

Line#:17 R.Time:28.440(Scan#:2745) MassPeaks:10

RawMode:Averaged 28.430-28.450(2744-2746) BasePeak:73.05(1713)

BG Mode:Calc. from Peak Group 1 - Event 1

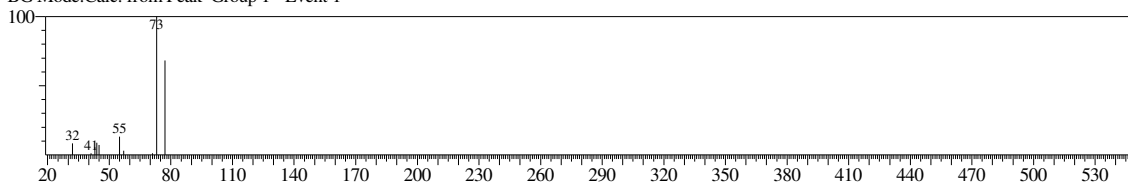

Hit#:1 Entry:313877 Library:WILEY7.LIB

SI:84 Formula:C16 H22 F12 O SI CAS:0-00-0 MolWeight:486 RetIndex:0

CompName:1-Propyl-1-[(tert-butyldimethylsilyl)oxy]perfloroheptene \$\$

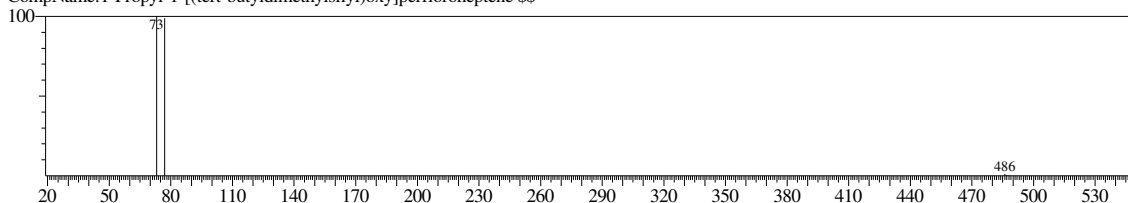

Hit#:2 Entry:131322 Library:WILEY7.LIB

SI:84 Formula:C10 H16 O2 S SI CAS:17872-92-3 MolWeight:228 RetIndex:0

CompName:phenylsulphonyltrimethylsilylmethane \$\$ BENZENESULFONYLMETHYL-TRIMETHYL-SILANE \$\$ Silane, trimethyl[(phenylsulfonyl)me

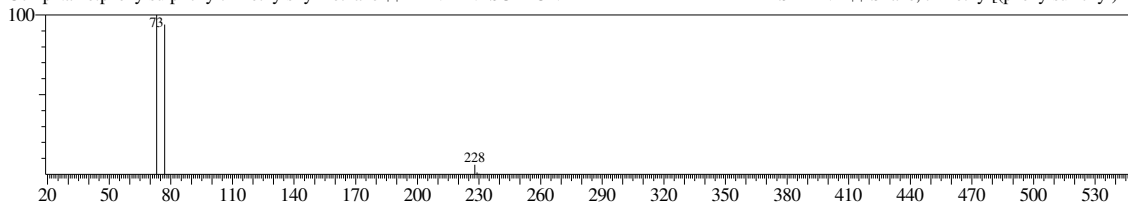

Hit#:3 Entry:30498 Library:WILEY7.LIB

SI:83 Formula:C4 H9 F3 SI CAS:81290-20-2 MolWeight:142 RetIndex:0

CompName:TRIFLUORMETHYL-TRIMETHYLSILAN \$\$

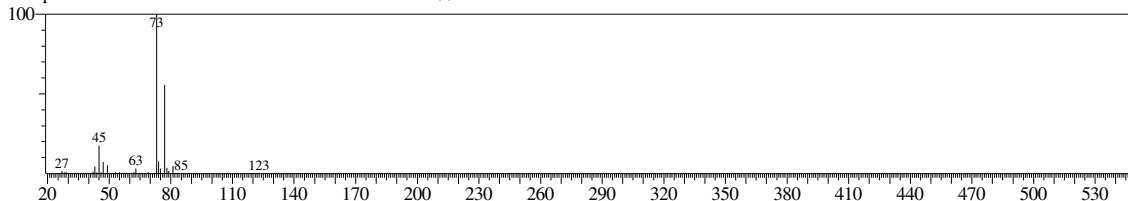

Hit#:4 Entry:244575 Library:WILEY7.LIB

SI:81 Formula:C12 H17 F7 O SI CAS:0-00-0 MolWeight:338 RetIndex:0

CompName:6-Perfluoroisopropyl-1-trimethylsiloxy-1-cyclohexene \$\$

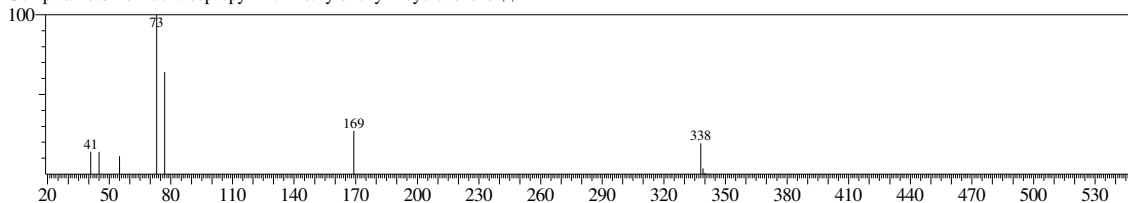

Hit#:5 Entry:323327 Library:WILEY7.LIB

SI:81 Formula:C15 H16 F16 O SI CAS:0-00-0 MolWeight:544 RetIndex:0

CompName:1-Propyl-1-[(trimethylsilyl)oxy]perflorononene \$\$

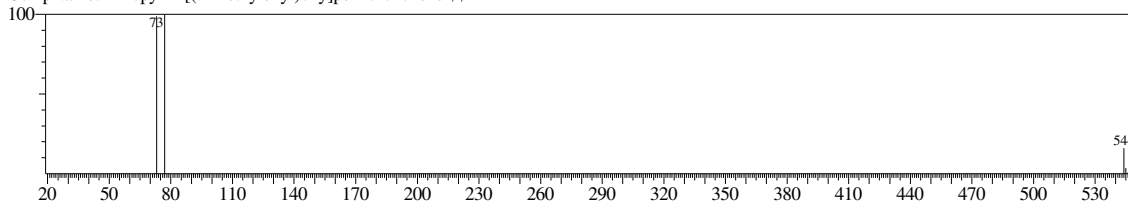

<< Target >>

Line#:18 R.Time:28.780(Scan#:2779) MassPeaks:26

RawMode:Averaged 28.770-28.790(2778-2780) BasePeak:83.10(6215)

BG Mode:Calc. from Peak Group 1 - Event 1

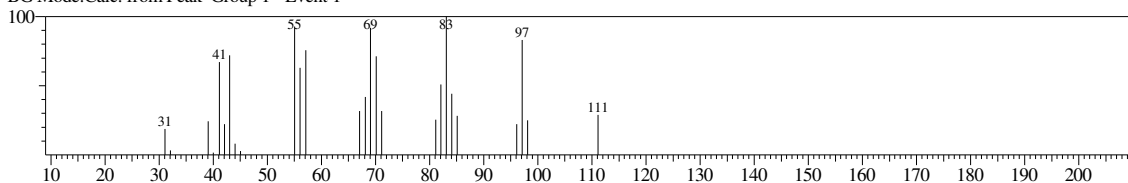

Hit#:1 Entry:96024 Library:WILEY7.LIB

SI:91 Formula:C13 H28 O CAS:112-70-9 MolWeight:200 RetIndex:0

CompName:1-Tridecanol (CAS) n-Tridecanol \$\$ n-Tridecan-1-ol \$\$ Tridecyl alcohol \$\$ n-Tridecyl alcohol \$\$ Tridecanol \$\$ 1-Hydroxytridecane \$\$ prima

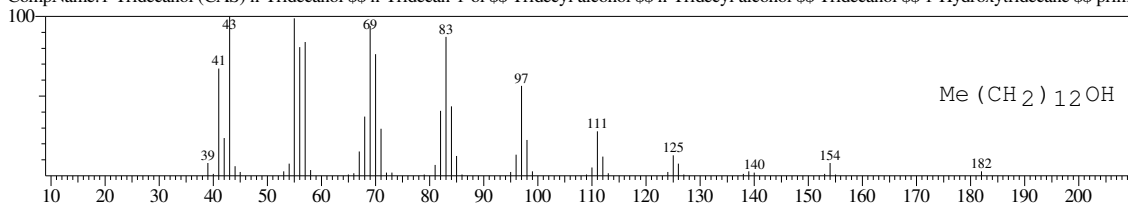

Hit#:2 Entry:113625 Library:WILEY7.LIB

SI:90 Formula:C14 H30 O CAS:112-72-1 MolWeight:214 RetIndex:0

CompName:1-Tetradecanol (CAS) Alfol 14 \$\$ Tetradecanol \$\$ Loxanol V \$\$ Lanette K \$\$ Lanette Wax KS \$\$ n-Tetradecanol \$\$ Myristic alcohol \$\$ Myr

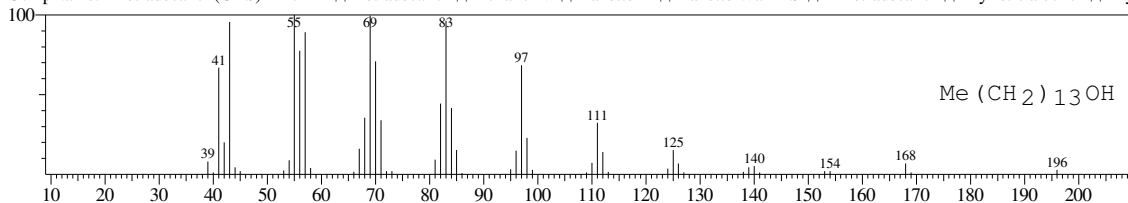

Hit#:3 Entry:113614 Library:WILEY7.LIB

SI:90 Formula:C14 H30 O CAS:112-72-1 MolWeight:214 RetIndex:0

CompName:1-Tetradecanol (CAS) Alfol 14 \$\$ Tetradecanol \$\$ Loxanol V \$\$ Lanette K \$\$ Lanette Wax KS \$\$ n-Tetradecanol \$\$ Myristic alcohol \$\$ Myr

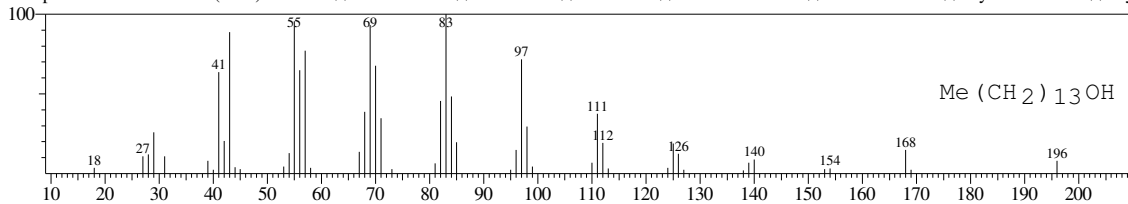

Hit#:4 Entry:327809 Library:WILEY7.LIB

SI:90 Formula:C36 H75 O3 P CAS:19047-85-9 MolWeight:587 RetIndex:0

CompName:Phosphonic acid, dioctadecyl ester (CAS) Di(n-octadecyl) phosphite \$\$ Dioctadecyl phosphite \$\$ Dioctadecyl phosphonate \$\$ Distearyl phospl

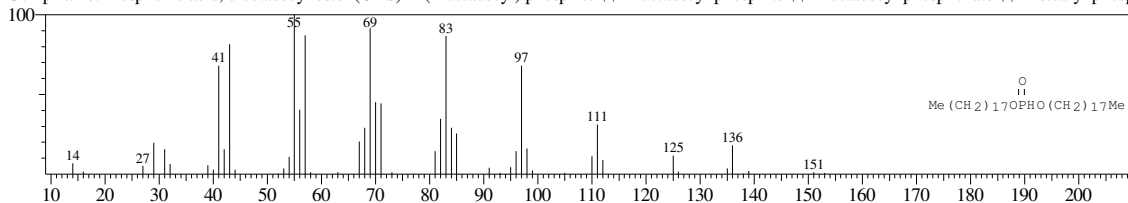

Hit#:5 Entry:131523 Library:WILEY7.LIB

SI:90 Formula:C15 H32 O CAS:629-76-5 MolWeight:228 RetIndex:0

CompName:1-Pentadecanol (CAS) Pentadecanol \$\$ n-Pentadecanol \$\$ n-1-Pentadecanol \$\$ Pentadecyl alcohol \$\$ Pentadecanol-(1) \$\$

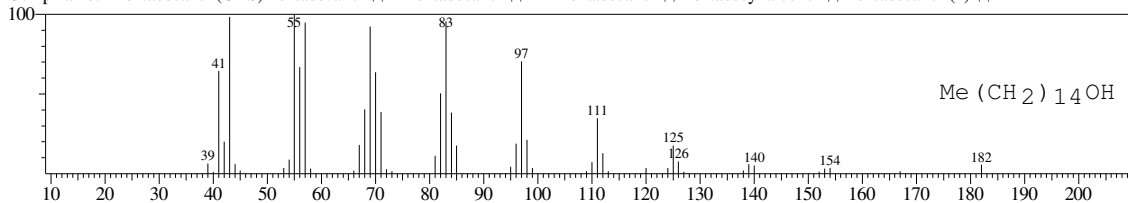

<< Target >>

Line#:19 R.Time:29.300(Scan#:2831) MassPeaks:16

RawMode:Averaged 29.290-29.310(2830-2832) BasePeak:58.05(2318)

BG Mode:Calc. from Peak Group 1 - Event 1

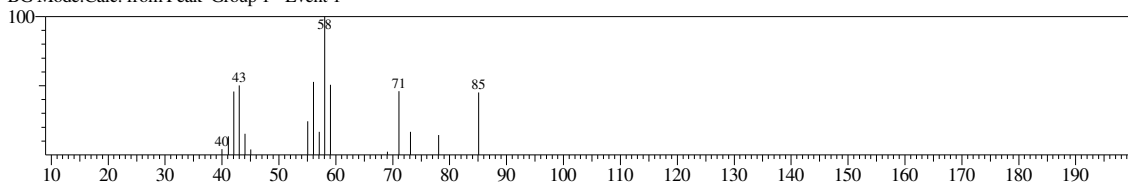

Hit#:1 Entry:7138 Library:WILEY7.LIB

SI:80 Formula:C6 H12 O CAS:4468-66-0 MolWeight:100 RetIndex:0

CompName:Oxirane, 2,3-diethyl- (CAS) 3,4-EPOXYHEXANE \$\$ Hexane, 3,4-epoxy- \$\$ 2,3-DIETHYL-OXIRANE \$\$

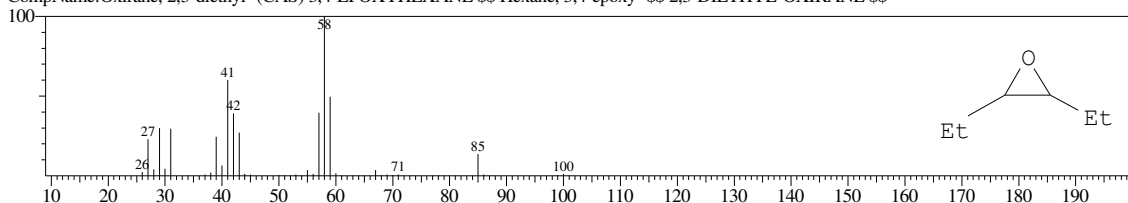

Hit#:2 Entry:7139 Library:WILEY7.LIB

SI:80 Formula:C6 H12 O CAS:4468-66-0 MolWeight:100 RetIndex:0

CompName:Oxirane, 2,3-diethyl- (CAS) 3,4-EPOXYHEXANE \$\$ Hexane, 3,4-epoxy- \$\$ 2,3-DIETHYL-OXIRANE \$\$

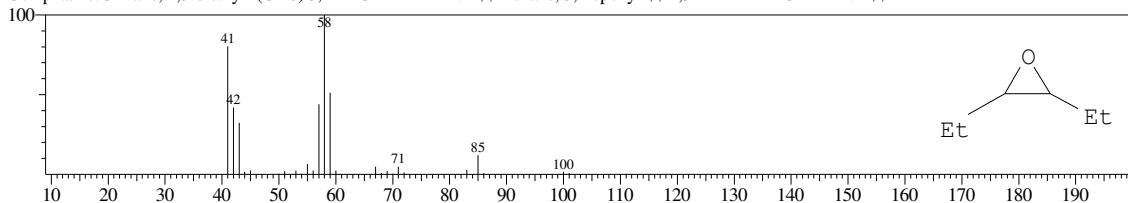

Hit#:3 Entry:6863 Library:WILEY7.LIB

SI:78 Formula:C5 H12 N2 CAS:109-01-3 MolWeight:100 RetIndex:0

CompName:Piperazine, 1-methyl- (CAS) N-Methylpiperazine \$\$ 1-Methylpiperazine \$\$ 4-Methylpiperazine \$\$ Methylpiperazine \$\$ 1-Methylpiperazine \$\$

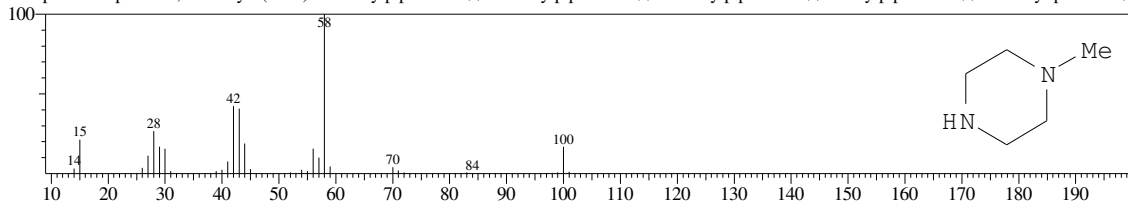

Hit#:4 Entry:12189 Library:WILEY7.LIB

SI:78 Formula:C7 H12 D2 O CAS:34061-63-7 MolWeight:114 RetIndex:0

CompName:ALLYL N-BUTYL-3,3 D2 ETHER \$\$ Allyl n-butyl-3,3-d2 ether \$\$

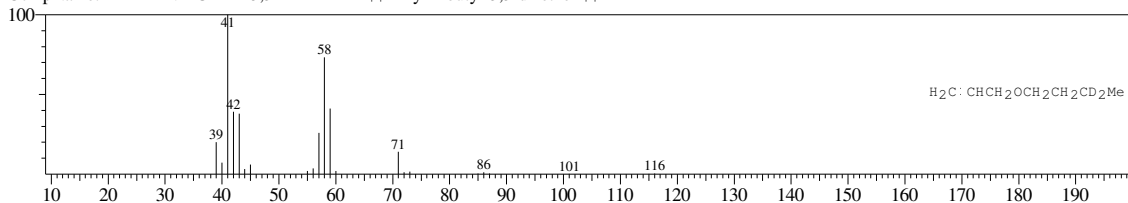

Hit#:5 Entry:93643 Library:WILEY7.LIB

SI:78 Formula:C13 H26 O CAS:593-08-8 MolWeight:198 RetIndex:0

CompName:2-Tridecanone (CAS) Methyl undecyl ketone \$\$ 2-Tridecanone \$\$ Tridecan-2-one \$\$ Methyl undecyl ketone \$\$ Tridecanone-2 \$\$

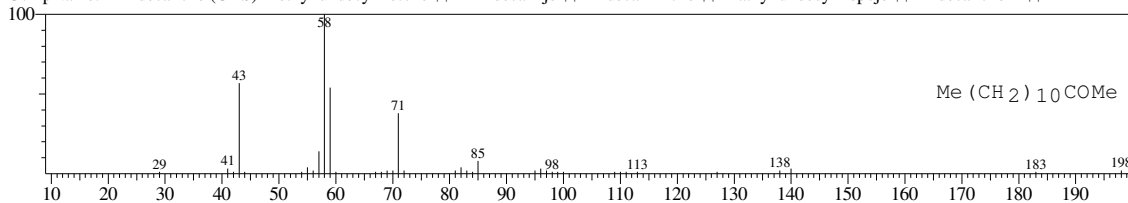

<< Target >>

Line#:20 R.Time:29.640(Scan#:2865) MassPeaks:14

RawMode:Averaged 29.630-29.650(2864-2866) BasePeak:56.05(1139)

BG Mode:Calc. from Peak Group 1 - Event 1

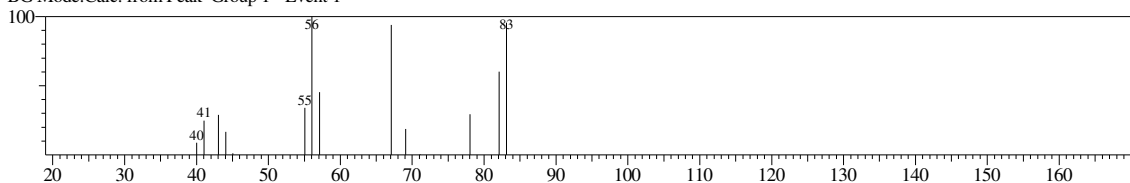

Hit#:1 Entry:29954 Library:WILEY7.LIB

SI:78 Formula:C10 H20 CAS:3178-22-1 MolWeight:140 RetIndex:0

CompName:Cyclohexane, (1,1-dimethylethyl)- (CAS) tert-Butylcyclohexane \$\$ 1-tert-Butylcyclohexane \$\$ Cyclohexane, tert-butyl- \$\$ t-Butylcyclohexane

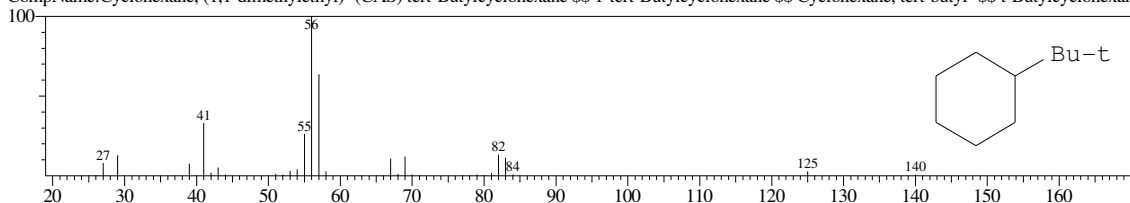

Hit#:2 Entry:29953 Library:WILEY7.LIB

SI:77 Formula:C10 H20 CAS:3178-22-1 MolWeight:140 RetIndex:0

CompName:Cyclohexane, (1,1-dimethylethyl)- (CAS) tert-Butylcyclohexane \$\$ 1-tert-Butylcyclohexane \$\$ Cyclohexane, tert-butyl- \$\$ t-Butylcyclohexane

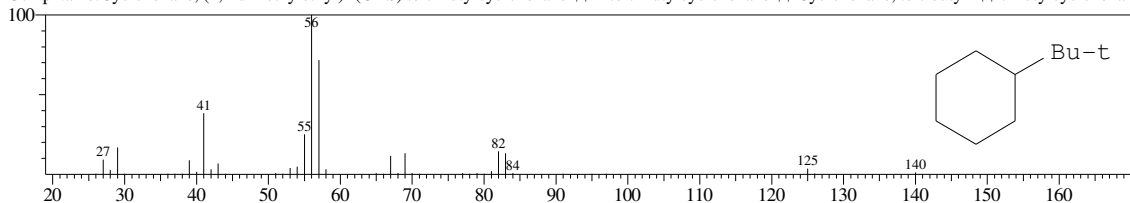

Hit#:3 Entry:6307 Library:WILEY7.LIB

SI:77 Formula:C6 H13 N CAS:55108-01-5 MolWeight:99 RetIndex:0

CompName:HEX-4-ENYLAMINE \$\$

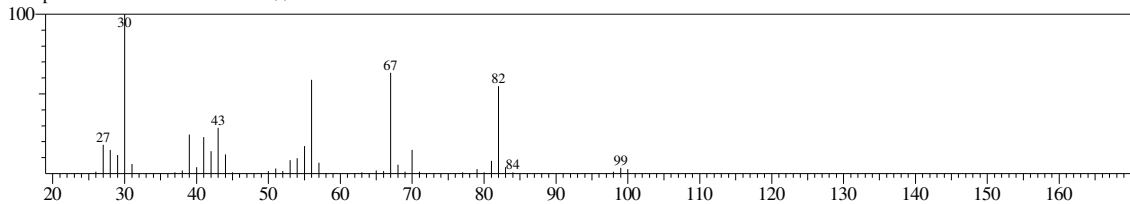

Hit#:4 Entry:20366 Library:WILEY7.LIB

SI:76 Formula:C7 H12 O2 CAS:4351-54-6 MolWeight:128 RetIndex:0

CompName:Formic acid, cyclohexyl ester (CAS) Cyclohexyl formate \$\$ Cyclohexyl ester of formic acid \$\$

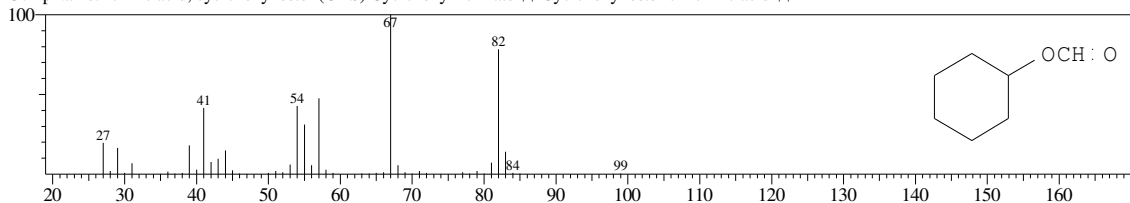

Hit#:5 Entry:58921 Library:WILEY7.LIB

SI:76 Formula:C12 H24 CAS:4292-75-5 MolWeight:168 RetIndex:0

CompName:Cyclohexane, hexyl- (CAS) Hexylcyclohexane \$\$ 1-Cyclohexylhexane \$\$ Cyclohexane, n-hexyl- \$\$ Hexane, 1-cyclohexyl- \$\$ n-Hexylcyclohexane

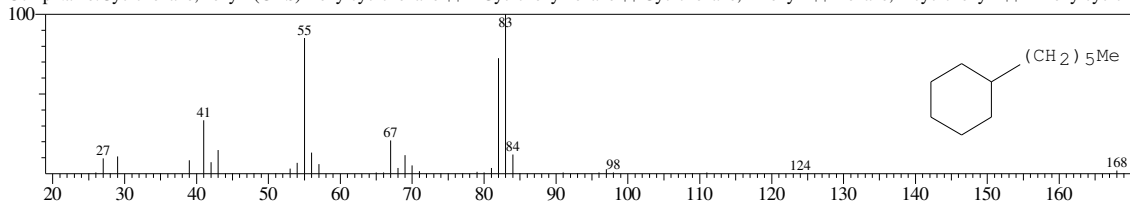

<< Target >>

Line#:21 R.Time:30.410(Scan#:2942) MassPeaks:13

RawMode:Averaged 30.400-30.420(2941-2943) BasePeak:56.05(1107)

BG Mode:Calc. from Peak Group 1 - Event 1

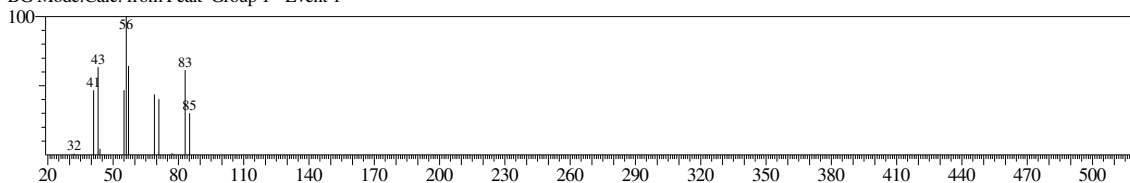

Hit#:1 Entry:319241 Library:WILEY7.LIB

SI:86 Formula:C30 H58 O4 S CAS:123-28-4 MolWeight:514 RetIndex:0

CompName:DI-LAURYL THIO-DI-PROPIONATE \$\$ Propanoic acid, 3,3'-thiobis-, didodecyl ester (CAS) DLT \$\$ DLTP \$\$ DLTDP \$\$ DMPTP \$\$ PS 8

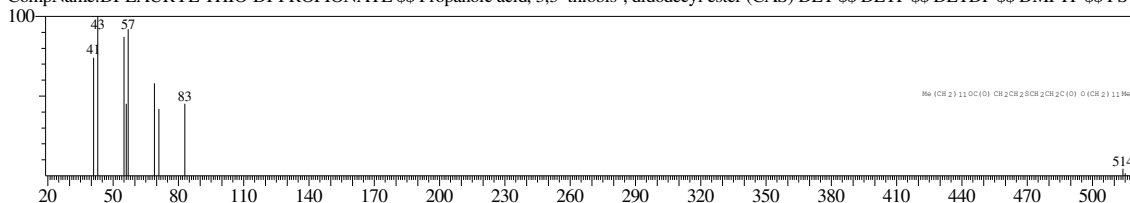

Hit#:2 Entry:97472 Library:WILEY7.LIB

SI:85 Formula:C12 H26 S CAS:0-00-0 MolWeight:202 RetIndex:0

CompName:dihexylsulfide \$\$

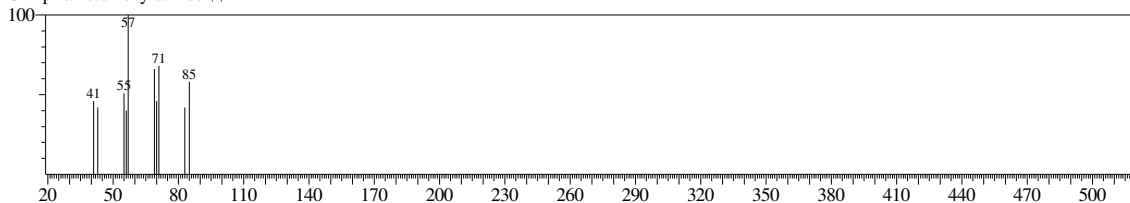

Hit#:3 Entry:12862 Library:WILEY7.LIB

SI:84 Formula:C8 H18 CAS:583-48-2 MolWeight:114 RetIndex:0

CompName:Hexane, 3,4-dimethyl- (CAS) 3,4-Dimethylhexane \$\$

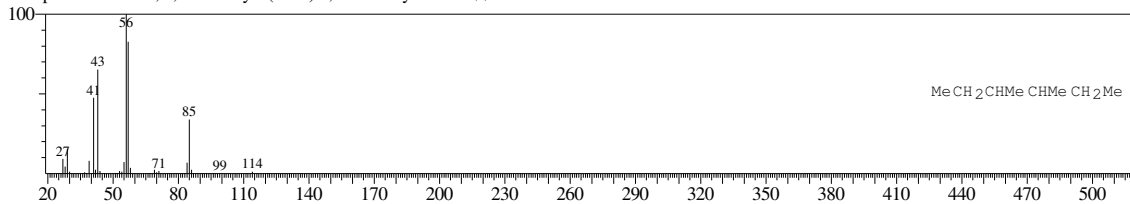

Hit#:4 Entry:95463 Library:WILEY7.LIB

SI:84 Formula:C13 H28 O CAS:0-00-0 MolWeight:200 RetIndex:0

CompName:2-Propyldecan-1-ol \$\$

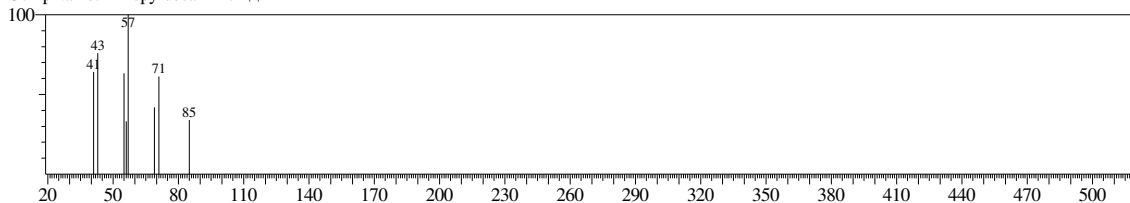

Hit#:5 Entry:13436 Library:WILEY7.LIB

SI:83 Formula:C7 H16 O CAS:20180-66-9 MolWeight:116 RetIndex:0

CompName:(s)-3,4-dimethylpentanol-1 \$\$ 1-Pentanol, 3,4-dimethyl-, (S)- (CAS) 1-Pentanol, 3,4-dimethyl-, (S)-(-) (CAS)

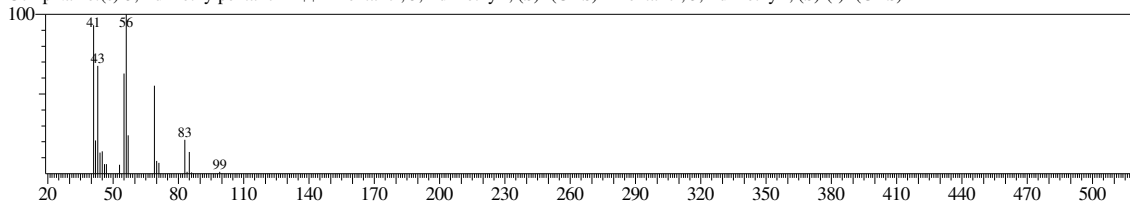

<< Target >>

Line#:22 R.Time:31.360(Scan#:3037) MassPeaks:33

RawMode:Averaged 31.350-31.370(3036-3038) BasePeak:65.05(2735)

BG Mode:Calc. from Peak Group 1 - Event 1

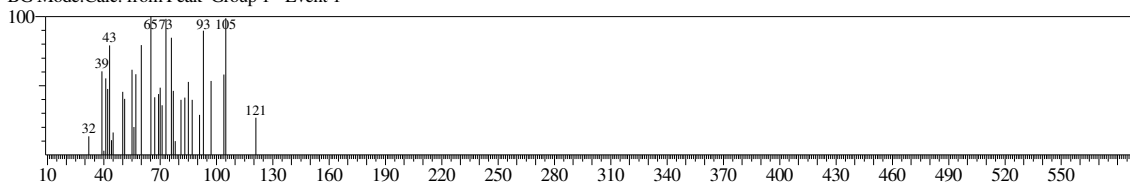

Hit#:1 Entry:303273 Library:WILEY7.LIB

SI:66 Formula:C28 H46 O4 CAS:56599-43-0 MolWeight:446 RetIndex:0

CompName:Octadecanoic acid, (2-phenyl-1,3-dioxolan-4-yl)methyl ester (CAS) BENZYLIDENE GLYCEROL STEARATE 3 \$\$

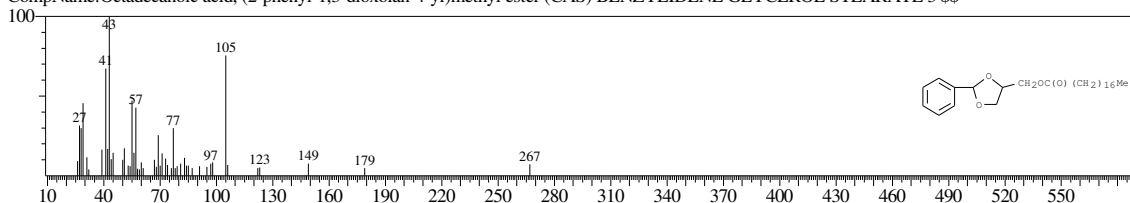

Hit#:2 Entry:301175 Library:WILEY7.LIB

SI:66 Formula:C28 H40 O4 CAS:56847-06-4 MolWeight:440 RetIndex:0

CompName:TRANS-2-PHENYL-1,3-DIOXOLANE-4-METHYL OCTADEC-9,12,15-TRIENOATE 9,12,15-Octadecatrienoic acid, (2-phenyl-1,3-diox

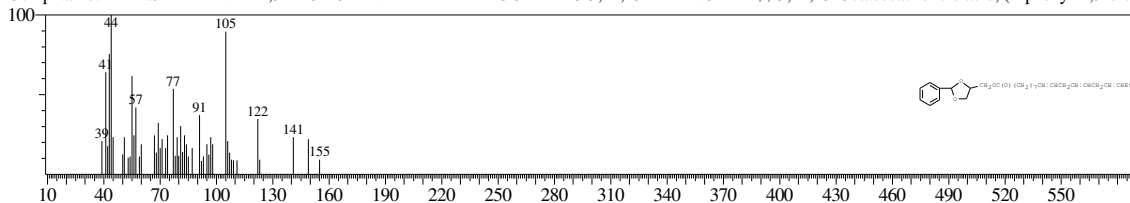

Hit#:3 Entry:327762 Library:WILEY7.LIB

SI:66 Formula:C35 H54 O7 CAS:55401-96-2 MolWeight:586 RetIndex:0

CompName:30-Norlupan-20-one, 3,21,28-tris(acetyloxy)-, (3.beta.,21.beta.)- (CAS)

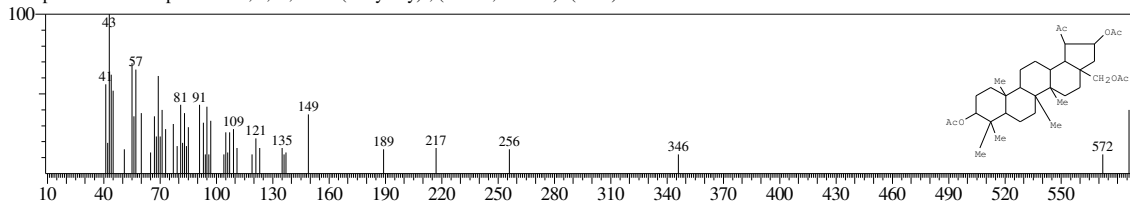

Hit#:4 Entry:52540 Library:WILEY7.LIB

SI:65 Formula:C8 H17 Cl O CAS:0-00-0 MolWeight:164 RetIndex:0

CompName:1-Chloro-2,2,4-trimethylpentan-3-ol 3\$

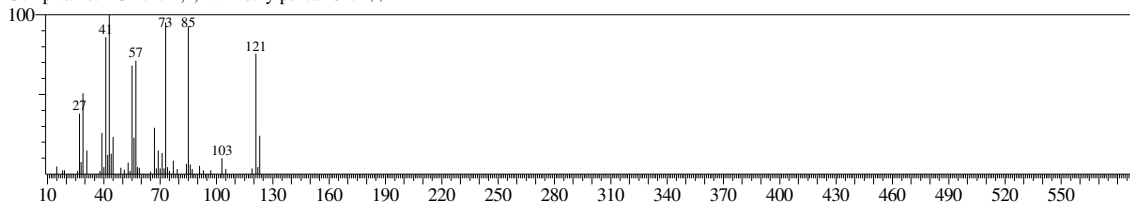

Hit#:5 Entry:299843 Library:WILEY7.LIB

SI:65 Formula:C26 H44 O5 CAS:0-00-0 MolWeight:436 RetIndex:0

CompName:ETHYL ISO-ALLOCHOLATE 3\$

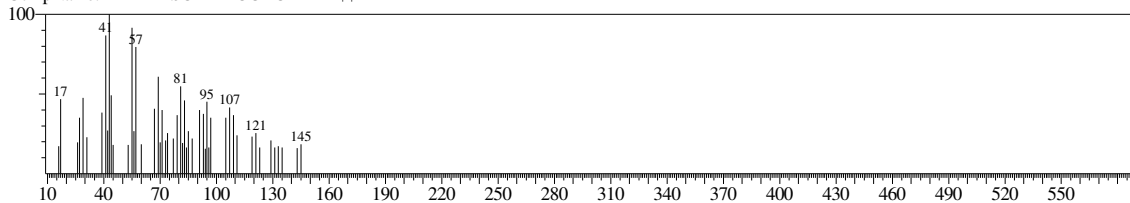



<< Target >>

Line#:23 R.Time:32.050(Scan#:3106) MassPeaks:37

RawMode:Averaged 32.040-32.060(3105-3107) BasePeak:58.05(21880)

BG Mode:Calc. from Peak Group 1 - Event 1

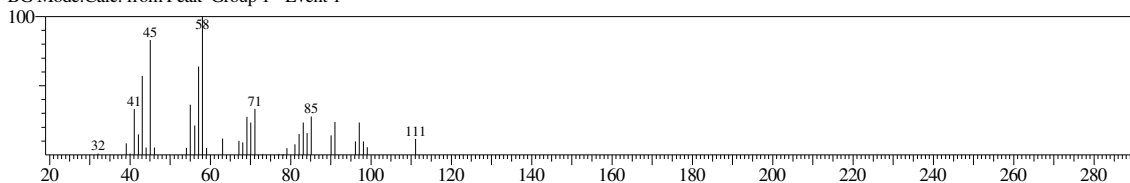

Hit#1 Entry:147924 Library:WILEY7.LIB

SI:82 Formula:C15 H30 O2 CAS:2461-18-9 MolWeight:242 RetIndex:0

CompName:Oxirane, [(dodecyloxy)methyl]- (CAS) Lauryl glycidyl ether \$\$ Dodecyl glycidyl ether \$\$ n-Dodecyl glycidyl ether \$\$ [(Dodecyloxy)methyl]o

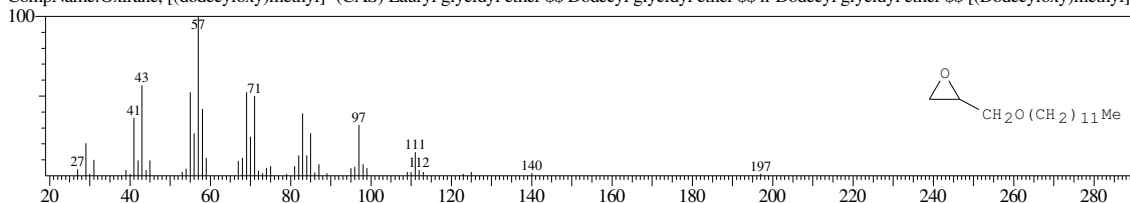

Hit#2 Entry:63458 Library:WILEY7.LIB

SI:81 Formula:C11 H24 O CAS:1653-30-1 MolWeight:172 RetIndex:0

CompName:2-Undecanol (CAS) sec-Undecyl alcohol \$\$ Methyl nonyl carbinol \$\$ undecan-2-ol \$\$ (+)-2-Undecanol \$\$ 2-Hydroxyundecane \$\$

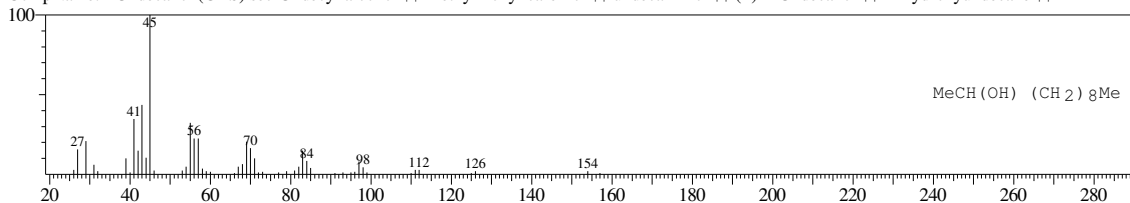

Hit#3 Entry:209517 Library:WILEY7.LIB

SI:81 Formula:C19 H38 O2 CAS:15965-99-8 MolWeight:298 RetIndex:0

CompName:Oxirane, [(hexadecyloxy)methyl]- \$\$ Propane, 1,2-epoxy-3-(hexadecyloxy)- \$\$ (Cetyloxymethyl)oxirane \$\$ Cetyl glycidyl ether \$\$ Glycidol .s

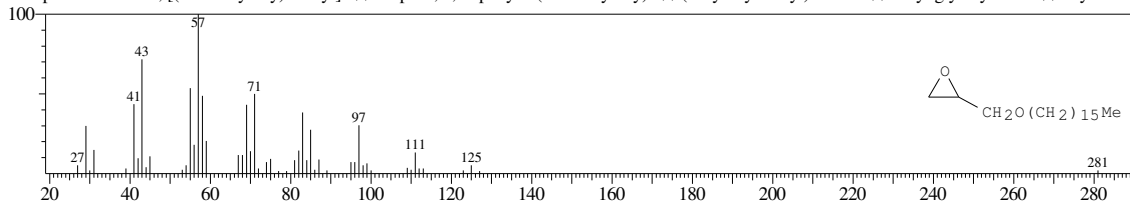

Hit#4 Entry:133808 Library:WILEY7.LIB

SI:81 Formula:C14 H30 O2 CAS:4536-30-5 MolWeight:230 RetIndex:0

CompName:Ethanol, 2-(dodecyloxy)- (CAS) DODECOXYETHANOL \$\$ 2-Dodecyloxyethanol \$\$ Laureth-1 \$\$ Lipocol 1-1 \$\$ Lauryl ethoxylate \$\$ 2-(Dc

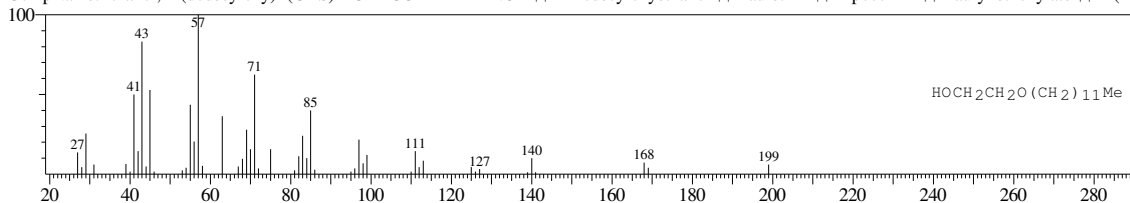

Hit#5 Entry:60659 Library:WILEY7.LIB

SI:80 Formula:C11 H22 O CAS:0-00-0 MolWeight:170 RetIndex:0

CompName:2,3,7-TRIMETHYLOCTANAL \$\$

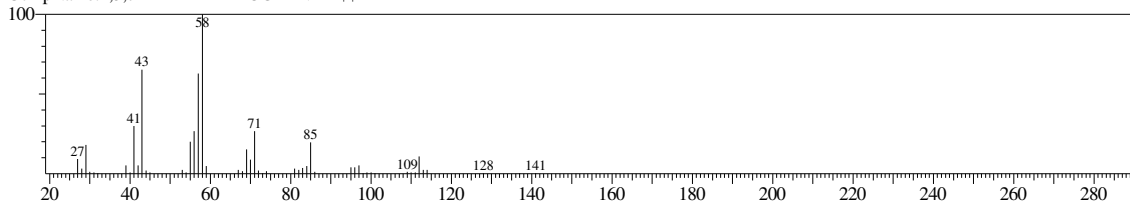

<< Target >>

Line#:24 R.Time:32.980(Scan#:3199) MassPeaks:19

RawMode:Averaged 32.970-32.990(3198-3200) BasePeak:105.05(2697)

BG Mode:Calc. from Peak Group 1 - Event 1

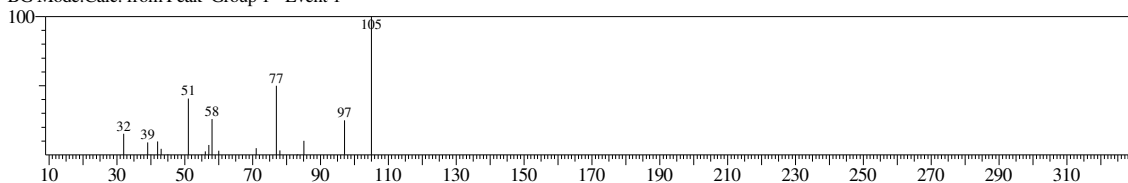

Hit#1 Entry:108883 Library:WILEY7.LIB

SI:78 Formula:C<sub>14</sub>H<sub>10</sub>O<sub>2</sub> CAS:134-81-6 MolWeight:210 RetIndex:0

CompName:Ethanedione, diphenyl- (CAS) Benzil \$\$ Dibenzoyl \$\$ Bibenzoyl \$\$ Diphenylglyoxal \$\$ Diphenylethanedione \$\$ 1,2-Diphenylethanedione \$\$

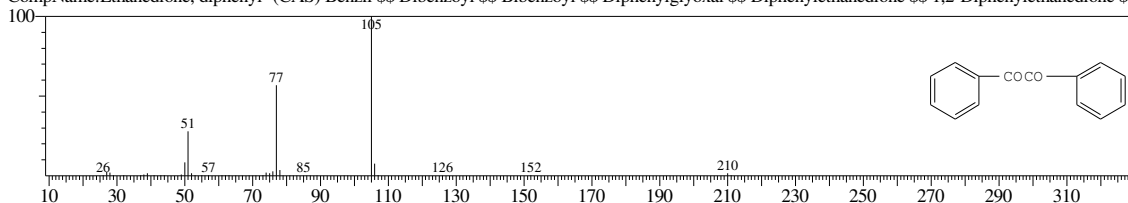

Hit#2 Entry:228439 Library:WILEY7.LIB

SI:76 Formula:C<sub>20</sub>H<sub>14</sub>O<sub>4</sub> CAS:0-00-0 MolWeight:318 RetIndex:0

CompName:1,4-PHENYLENE DIBENZOATE \$\$

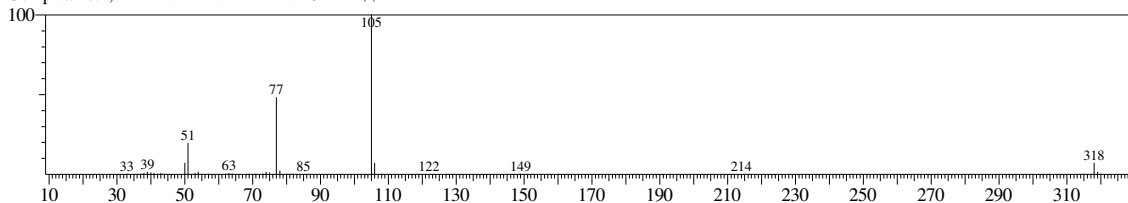

Hit#3 Entry:50791 Library:WILEY7.LIB

SI:75 Formula:C<sub>10</sub>H<sub>10</sub>O<sub>2</sub> CAS:0-00-0 MolWeight:162 RetIndex:0

CompName:Isopropenyl benzoate \$\$

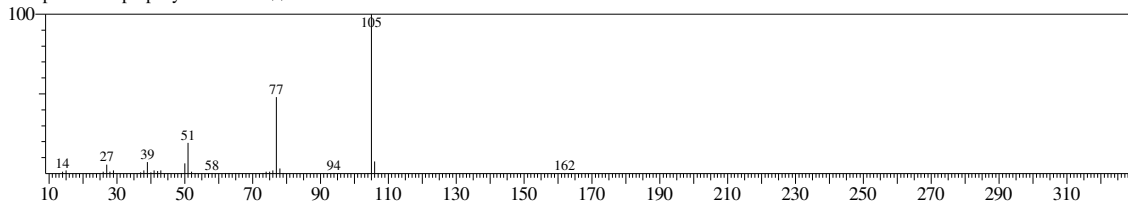

Hit#4 Entry:147117 Library:WILEY7.LIB

SI:75 Formula:C<sub>10</sub>H<sub>11</sub>BrO<sub>2</sub> CAS:113704-68-0 MolWeight:242 RetIndex:0

CompName:3-bromo-2-methoxy-1-phenylpropan-1-one \$\$ 1-Propanone, 3-bromo-2-methoxy-1-phenyl- (CAS)

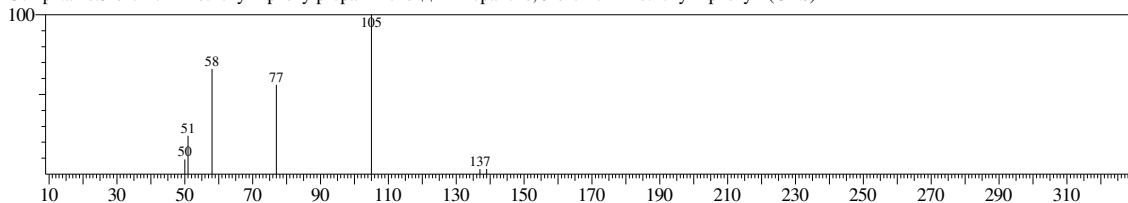

Hit#5 Entry:147591 Library:WILEY7.LIB

SI:75 Formula:C<sub>14</sub>H<sub>10</sub>O<sub>4</sub> CAS:797922-93-1 MolWeight:242 RetIndex:0

CompName:1-Benzoyloxy-2-formyloxybenzene \$\$

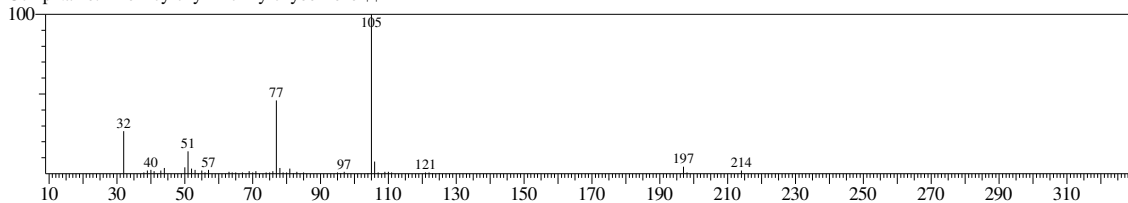

<< Target >>

Line#:25 R.Time:33.220(Scan#:3223) MassPeaks:21

RawMode:Averaged 33.210-33.230(3222-3224) BasePeak:84.10(1083)

BG Mode:Calc. from Peak Group 1 - Event 1

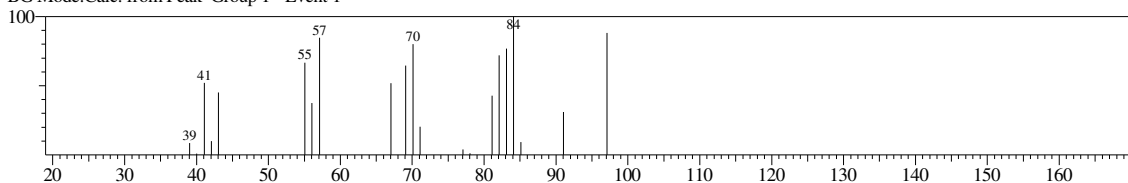

Hit#:1 Entry:58270 Library:WILEY7.LIB

SI:82 Formula:C12 H24 CAS:74630-41-4 MolWeight:168 RetIndex:0

CompName:1-Undecene, 9-methyl- (CAS)

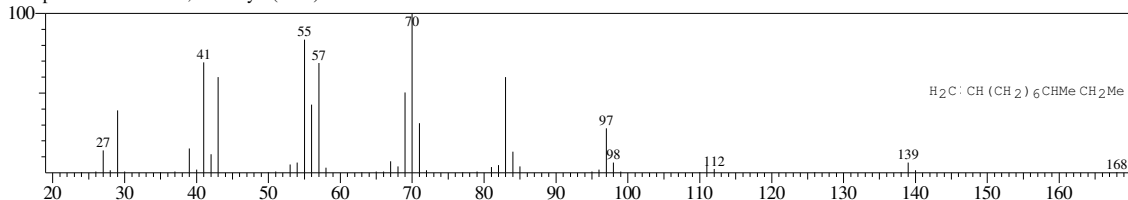

Hit#:2 Entry:47937 Library:WILEY7.LIB

SI:81 Formula:C9 H18 O2 CAS:112-32-3 MolWeight:158 RetIndex:0

CompName:Octyl formate \$\$ Formic acid, octyl ester \$\$ n-Octyl formate \$\$ n-Octyl methanoate \$\$ Octyl alcohol, formate \$\$

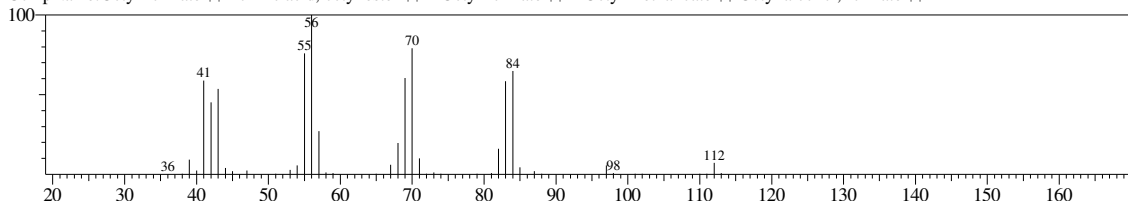

Hit#:3 Entry:58300 Library:WILEY7.LIB

SI:81 Formula:C12 H24 CAS:74630-56-1 MolWeight:168 RetIndex:0

CompName:4-Undecene, 9-methyl-, (Z)- (CAS)

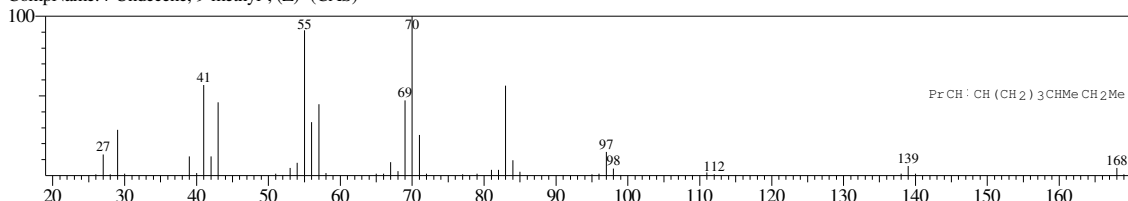

Hit#:4 Entry:58289 Library:WILEY7.LIB

SI:81 Formula:C12 H24 CAS:74630-50-5 MolWeight:168 RetIndex:0

CompName:3-Undecene, 9-methyl-, (Z)- (CAS)

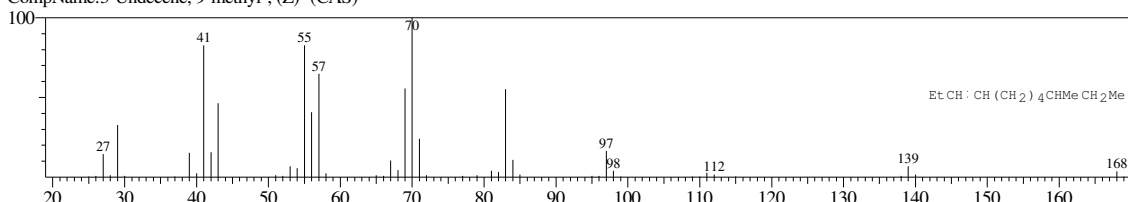

Hit#:5 Entry:58290 Library:WILEY7.LIB

SI:81 Formula:C12 H24 CAS:74630-54-9 MolWeight:168 RetIndex:0

CompName:3-Undecene, 9-methyl-, (E)- (CAS)

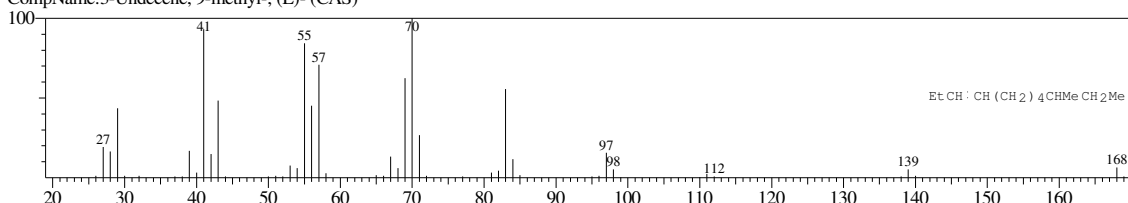

<< Target >>

Line#:26 R.Time:33.430(Scan#:3244) MassPeaks:35

RawMode:Averaged 33.420-33.440(3243-3245) BasePeak:100.10(136399)

BG Mode:Calc. from Peak Group 1 - Event 1

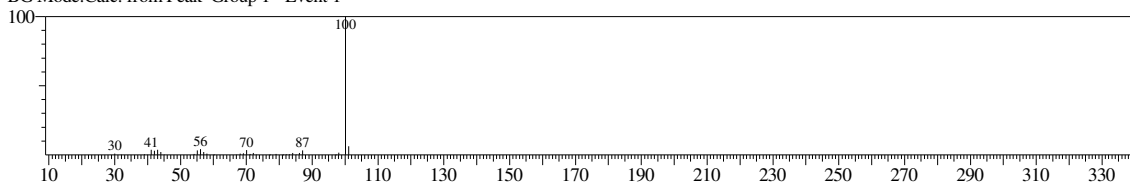

Hit#:1 Entry:245978 Library:WILEY7.LIB

SI:95 Formula:C22 H45 N O CAS:16528-77-1 MolWeight:339 RetIndex:0

CompName:MORPHOLINE, 4-OCTADECYL- \$\$

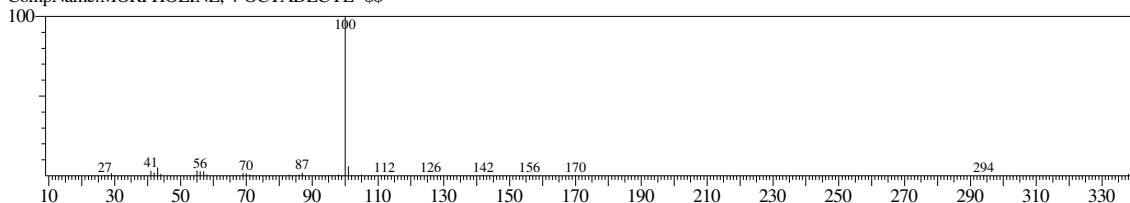

Hit#:2 Entry:21283 Library:WILEY7.LIB

SI:92 Formula:C6 H14 N2 O CAS:2038-03-1 MolWeight:130 RetIndex:0

CompName:4-Morpholineethanamine \$\$ Morpholine, 4-(2-aminoethyl)- \$.beta.-Morpholinoethylamine \$\$ Morpholinoethylamine \$\$ N-(.beta.-Aminoethyl)-

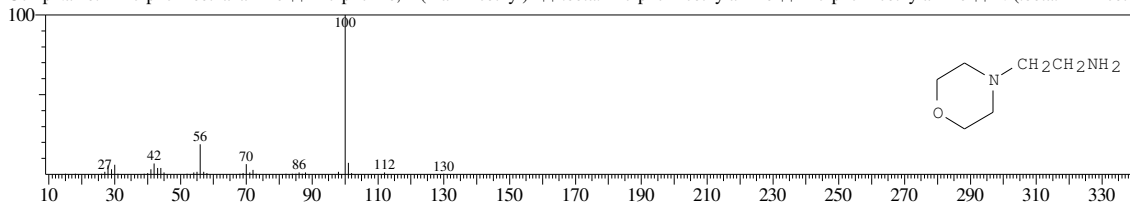

Hit#:3 Entry:233068 Library:WILEY7.LIB

SI:90 Formula:C13 H16 N4 O6 CAS:139-91-3 MolWeight:324 RetIndex:0

CompName:Furaltadone \$\$ 2-Oxazolidinone, 5-(4-morpholinylmethyl)-3-[[[(5-nitro-2-furanyl)methylene]amino]- \$\$ component of Altapen \$\$ Altabactina \$

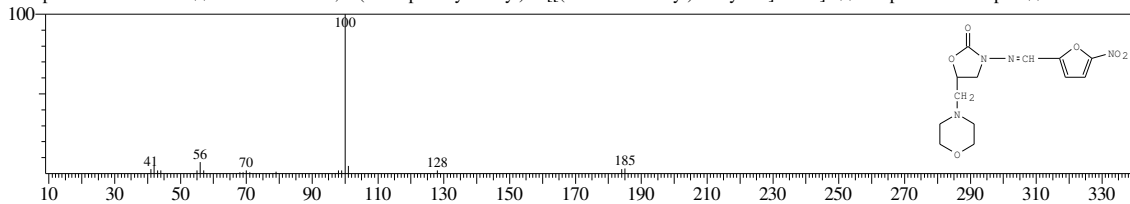

Hit#:4 Entry:31994 Library:WILEY7.LIB

SI:89 Formula:C7 H13 N O2 CAS:0-00-0 MolWeight:143 RetIndex:0

CompName:2-(E)-HEXENSAEURE, (4S)-AMINO-5-METHYL- \$\$

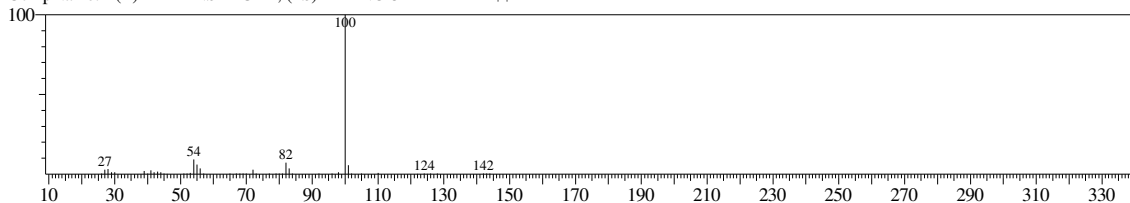

Hit#:5 Entry:22389 Library:WILEY7.LIB

SI:88 Formula:C6 H13 N O2 CAS:622-40-2 MolWeight:131 RetIndex:0

CompName:4-Morpholineethanol (CAS) 2-Morpholinoethanol \$.beta.-Morpholinoethanol \$\$ 2-(4-Morpholinyl)ethanol \$\$ 4-(2-Hydroxyethyl)morpholine

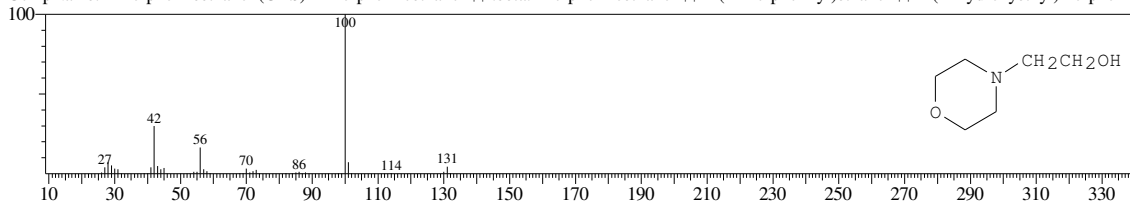

<< Target >>

Line#:27 R.Time:33.730(Scan#:3274) MassPeaks:42

RawMode:Averaged 33.720-33.740(3273-3275) BasePeak:99.05(16670)

BG Mode:Calc. from Peak Group 1 - Event 1

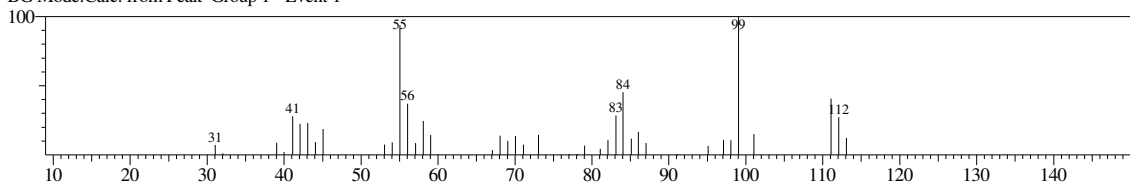

Hit#1 Entry:30600 Library:WILEY7.LIB

SI:78 Formula:C6 H11 B O3 CAS:74793-57-0 MolWeight:142 RetIndex:0

CompName:Furo[3,4-d]-1,3,2-dioxaborole, 2-ethyltetrahydro-, cis- (CAS)

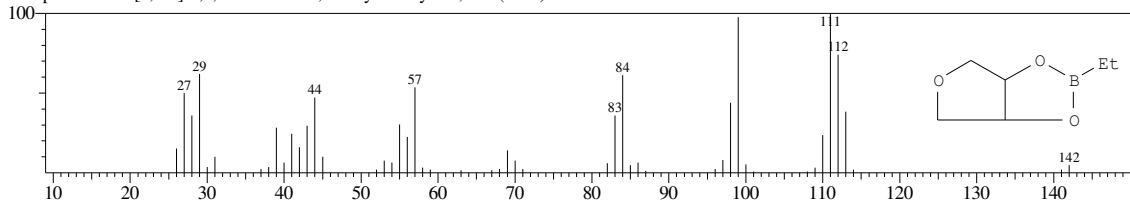

Hit#2 Entry:30599 Library:WILEY7.LIB

SI:78 Formula:C6 H11 B O3 CAS:0-00-0 MolWeight:142 RetIndex:0

CompName:ERYTHRIT, 1,4-ANHYDRO-2,3-O-(ETHYLBORANDIYL)- \$\$

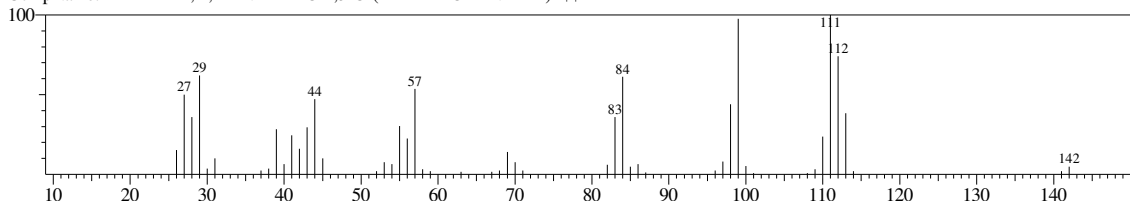

Hit#3 Entry:76806 Library:WILEY7.LIB

SI:78 Formula:C11 H20 O2 CAS:2499-59-4 MolWeight:184 RetIndex:0

CompName:2-Propenoic acid, octyl ester (CAS) Octyl acrylate \$\$ ENT 3827 \$\$ n-Octyl acrylate \$\$ Acrylic acid, octyl ester \$\$

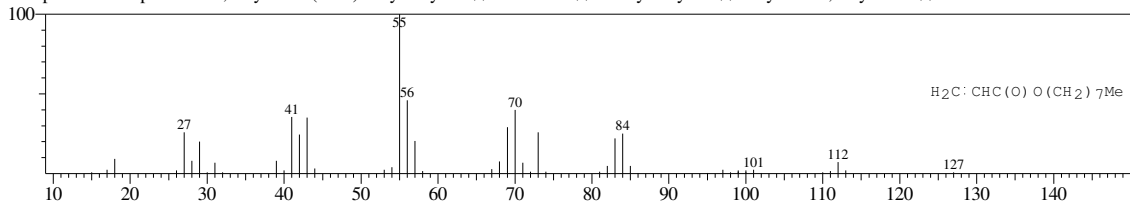

Hit#4 Entry:146042 Library:WILEY7.LIB

SI:77 Formula:C10 H18 B2 O5 CAS:0-00-0 MolWeight:240 RetIndex:0

CompName:ALDEHYDO-D-GLUCOSE, 2-DEOXY-3,5,4,6-DI-O-(ETHYLBORANDIYL)- \$\$

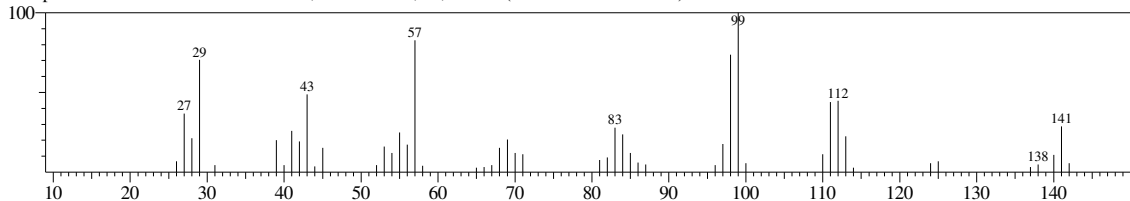

Hit#5 Entry:28503 Library:WILEY7.LIB

SI:77 Formula:C9 H15 D2 N CAS:89489-60-1 MolWeight:139 RetIndex:0

CompName:Ethenol, 2-ethoxy-, acetate (CAS)

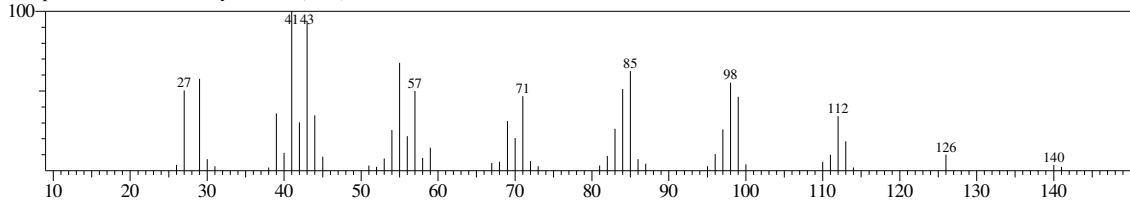

<< Target >>

Line#:28 R.Time:34.640(Scan#:3365) MassPeaks:19

RawMode:Averaged 34.630-34.650(3364-3366) BasePeak:85.10(737)

BG Mode:Calc. from Peak Group 1 - Event 1

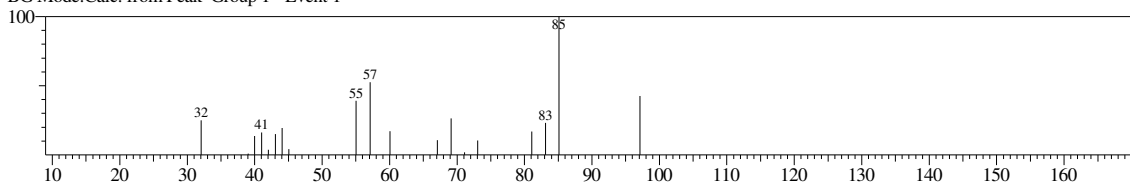

Hit#:1 Entry:13832 Library:WILEY7.LIB

SI:76 Formula:C6 H12 O2 CAS:100-72-1 MolWeight:116 RetIndex:0

CompName:2H-Pyran-2-methanol, tetrahydro- (CAS) 2-METHANOL TETRAHYDROPYRAN \$\$ Tetrahydropyran-2-carbinol \$\$ Tetrahydropyran-2-met

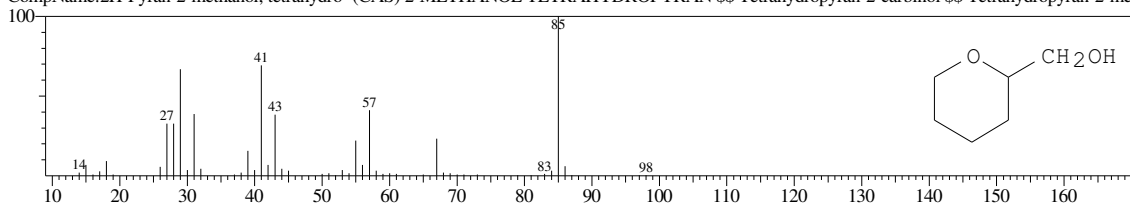

Hit#:2 Entry:20054 Library:WILEY7.LIB

SI:74 Formula:C8 H16 O CAS:0-00-0 MolWeight:128 RetIndex:0

CompName:2,2,4,4-Tetramethylcyclobutan-1-ol \$\$

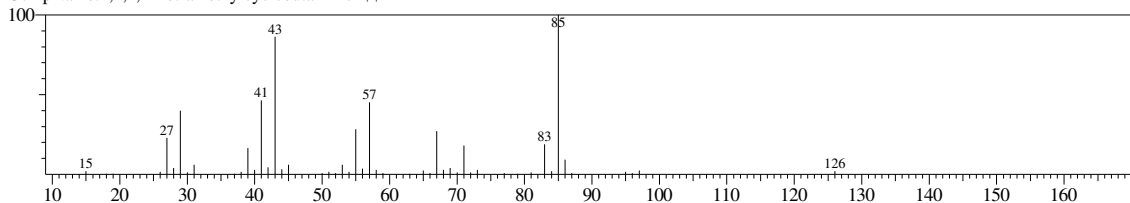

Hit#:3 Entry:145912 Library:WILEY7.LIB

SI:74 Formula:C16 H32 O CAS:0-00-0 MolWeight:240 RetIndex:0

CompName:2-Undecyl-tetrahydropyran \$\$

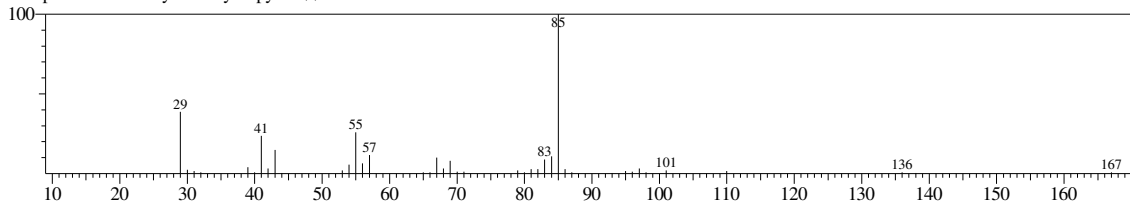

Hit#:4 Entry:44040 Library:WILEY7.LIB

SI:74 Formula:C10 H18 O CAS:0-00-0 MolWeight:154 RetIndex:0

CompName:dihydratagetonone \$\$ 2,6-dimethyloct-7-en-4-one \$\$

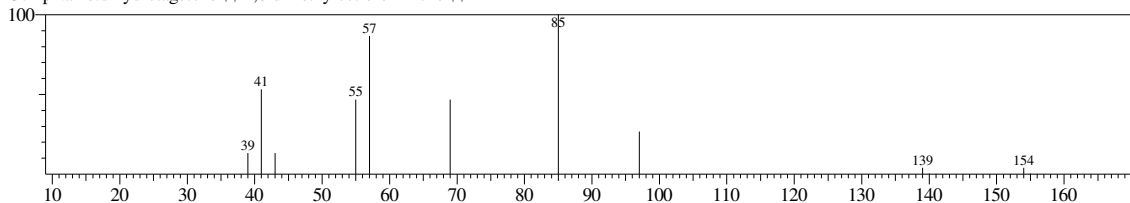

Hit#:5 Entry:78347 Library:WILEY7.LIB

SI:73 Formula:C10 H18 O3 CAS:0-00-0 MolWeight:186 RetIndex:0

CompName:n-Valeric Anhydride \$\$

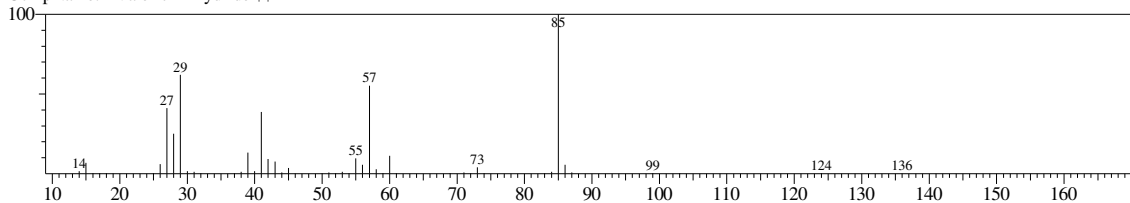

<< Target >>

Line#:29 R.Time:35.110(Scan#:3412) MassPeaks:26

RawMode:Averaged 35.100-35.120(3411-3413) BasePeak:88.05(2563)

BG Mode:Calc. from Peak Group 1 - Event 1

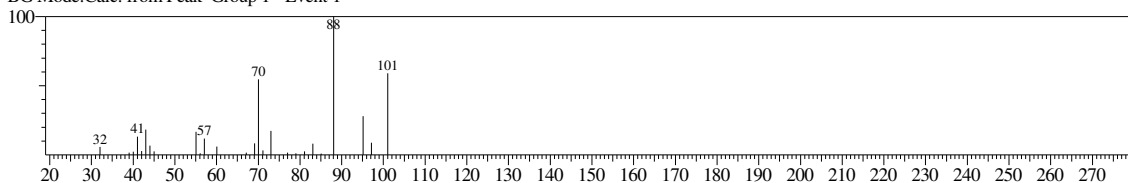

Hit#:1 Entry:148398 Library:WILEY7.LIB

SI:80 Formula:C15 H30 O2 CAS:28267-29-0 MolWeight:242 RetIndex:0

CompName:Ethyl tridecanoate \$\$ Tridecanoic acid ethyl ester \$\$ n-Tridecanoic acid ethyl ester \$\$ TRIDECANOIC ACID, ETHYL ESTER \$\$

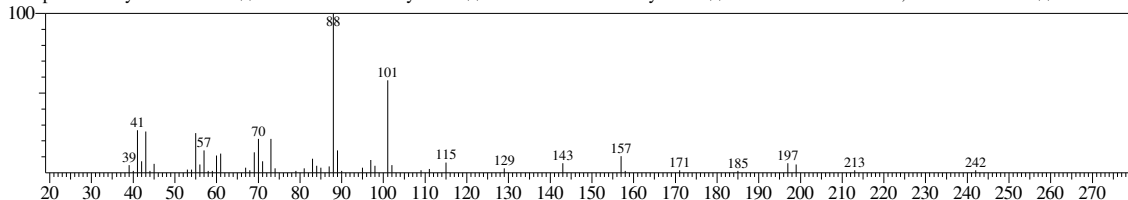

Hit#:2 Entry:164499 Library:WILEY7.LIB

SI:79 Formula:C16 H32 O2 CAS:124-06-1 MolWeight:256 RetIndex:0

CompName:Tetradecanoic acid, ethyl ester (CAS) Ethyl myristate \$\$ TETRADECANOIC ACID, ETHANOL ESTER \$\$ ETHYL-MYRISTATE \$\$ Ethyl

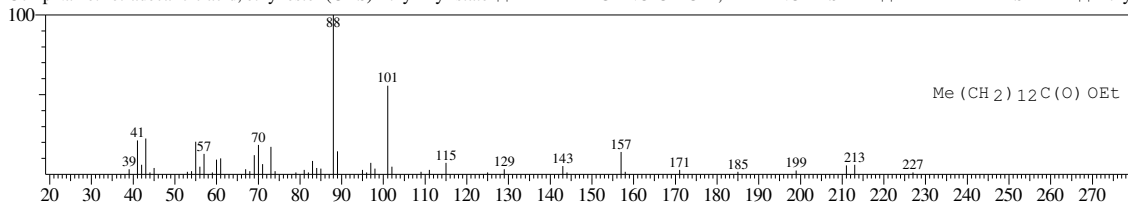

Hit#:3 Entry:113535 Library:WILEY7.LIB

SI:79 Formula:C13 H26 O2 CAS:627-90-7 MolWeight:214 RetIndex:0

CompName:Undecanoic acid, ethyl ester (CAS) Ethyl undecylate \$\$ Ethyl undecanoate \$\$ ETHYL HENDECANOATE \$\$ n-Undecanoic acid ethyl ester \$

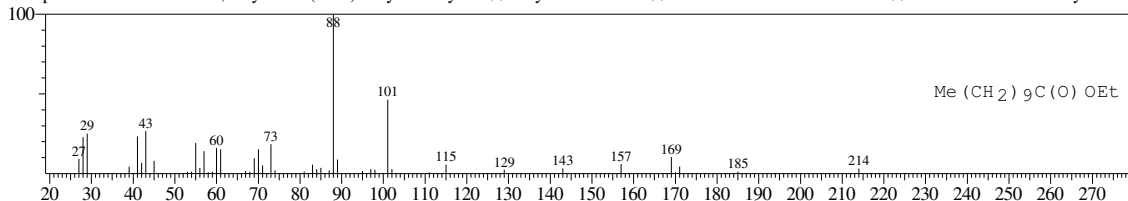

Hit#:4 Entry:180469 Library:WILEY7.LIB

SI:79 Formula:C17 H34 O2 CAS:41114-00-5 MolWeight:270 RetIndex:0

CompName:Pentadecanoic acid, ethyl ester \$\$ ethyl pentadecanoate \$\$ n-Pentadecanoic acid ethyl ester \$\$

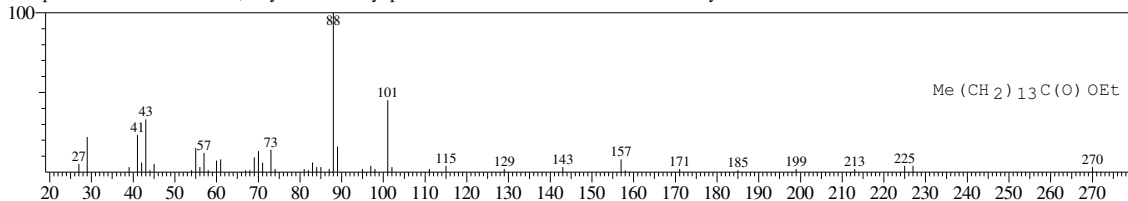

Hit#:5 Entry:180466 Library:WILEY7.LIB

SI:79 Formula:C17 H34 O2 CAS:41114-00-5 MolWeight:270 RetIndex:0

CompName:Pentadecanoic acid, ethyl ester \$\$ ethyl pentadecanoate \$\$ n-Pentadecanoic acid ethyl ester \$\$

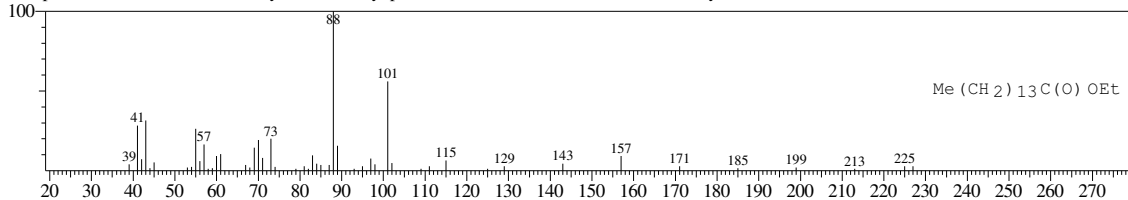

<< Target >>

Line#:30 R.Time:35.590(Scan#:3460) MassPeaks:49

RawMode:Averaged 35.580-35.600(3459-3461) BasePeak:73.05(19557)

BG Mode:Calc. from Peak Group 1 - Event 1

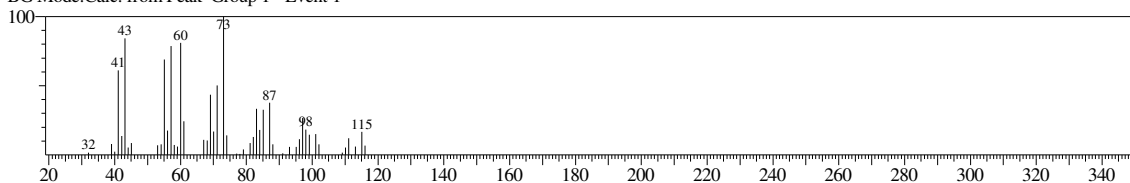

Hit#1 Entry:193348 Library:WILEY7.LIB

SI:91 Formula:C18 H34 O2 CAS:112-80-1 MolWeight:282 RetIndex:0

CompName:9-Octadecenoic acid (Z)- (CAS) Oleic acid \$\$ Red oil \$\$ Oelsaure \$\$ Oleine 7503 \$\$ Pamolyn 100 \$\$ Emersol 211 \$\$ Vopcolene 27 \$\$ cis-C

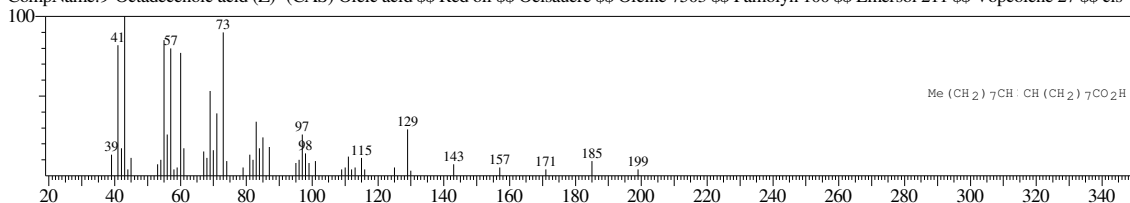

Hit#2 Entry:195573 Library:WILEY7.LIB

SI:89 Formula:C18 H36 O2 CAS:57-11-4 MolWeight:284 RetIndex:0

CompName:Octadecanoic acid (CAS) Stearic acid \$\$ n-Octadecanoic acid \$\$ PD 185 \$\$ NAA 173 \$\$ Vanicol \$\$ Kam 3000 \$\$ Kam 1000 \$\$ Kam 2000 \$\$

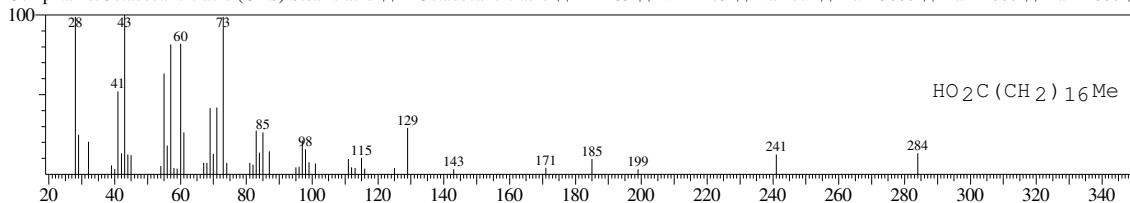

Hit#3 Entry:247102 Library:WILEY7.LIB

SI:88 Formula:C22 H44 O2 CAS:112-85-6 MolWeight:340 RetIndex:0

CompName:Docosanoic acid (CAS) Behenic acid \$\$ Glycon B-70 \$\$ Hydrofol 2022-55 \$\$ Hydrofol Acid 560 \$\$ n-Docosanoic acid \$\$ 1-Docosanoic acid

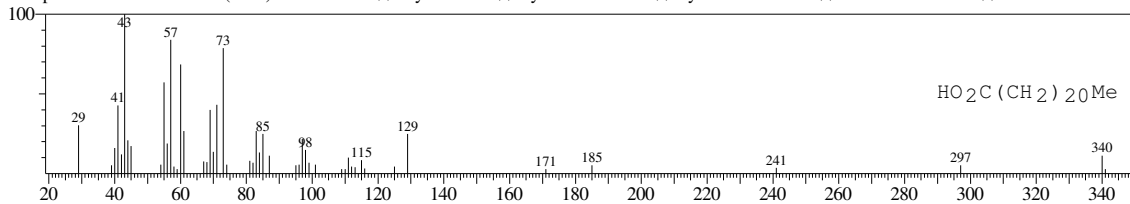

Hit#4 Entry:195570 Library:WILEY7.LIB

SI:88 Formula:C18 H36 O2 CAS:57-11-4 MolWeight:284 RetIndex:0

CompName:Octadecanoic acid (CAS) Stearic acid \$\$ n-Octadecanoic acid \$\$ PD 185 \$\$ NAA 173 \$\$ Vanicol \$\$ Kam 3000 \$\$ Kam 1000 \$\$ Kam 2000 \$\$

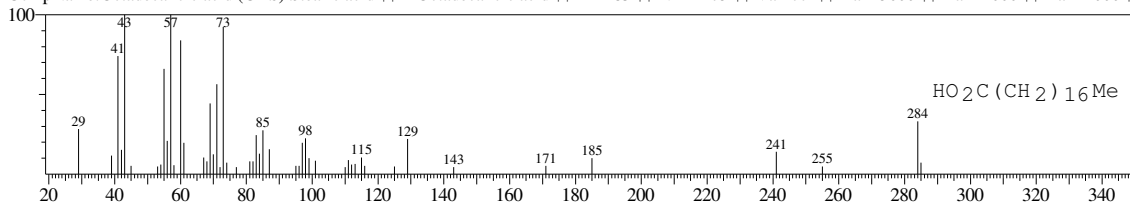

Hit#5 Entry:148359 Library:WILEY7.LIB

SI:88 Formula:C15 H30 O2 CAS:1002-84-2 MolWeight:242 RetIndex:0

CompName:Pentadecanoic acid (CAS) Pentadecylic acid \$\$ n-Pentadecanoic acid \$\$ n-Pentadecylic acid \$\$ Pentadecylic acid \$\$ PENTADECANSAEUR

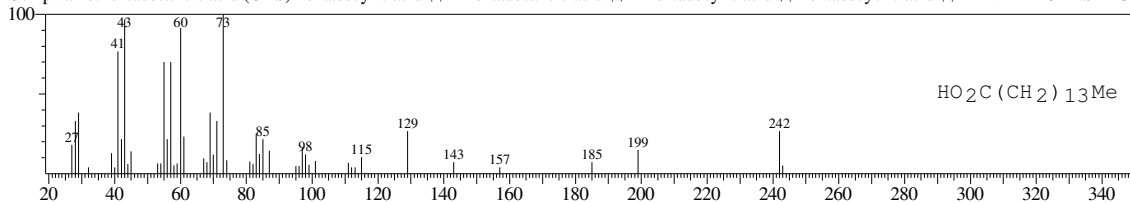



<< Target >>

Line#:31 R.Time:36.300(Scan#:3531) MassPeaks:29

RawMode:Averaged 36.290-36.310(3530-3532) BasePeak:45.05(4015)

BG Mode:Calc. from Peak Group 1 - Event 1

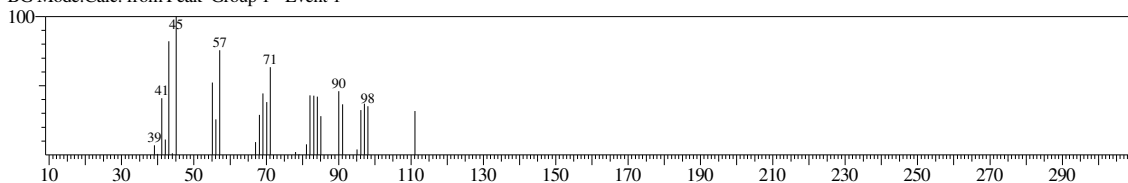

Hit#:1 Entry:235784 Library:WILEY7.LIB

SI:82 Formula:C22 H46 O CAS:661-19-8 MolWeight:326 RetIndex:0

CompName:1-Docosanol (CAS) Behenic alcohol \$\$ Behenyl alcohol \$\$ Docosyl alcohol \$\$ Docosanol-(1) \$\$

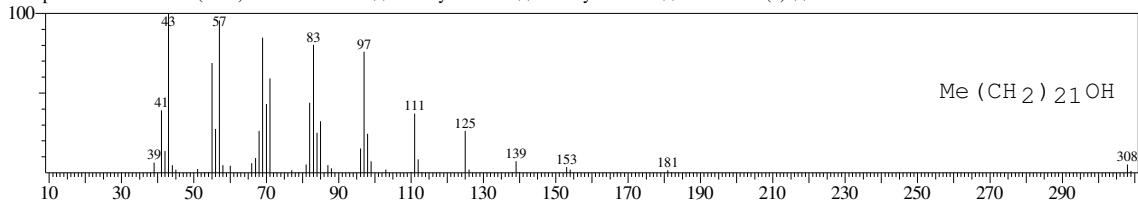

Hit#:2 Entry:178162 Library:WILEY7.LIB

SI:82 Formula:C18 H36 O CAS:822-28-6 MolWeight:268 RetIndex:0

CompName:Hexadecane, 1-(ethenyl)- \$\$ Ether, hexadecyl vinyl \$\$ HEXADECAL VINYL ETHER \$\$ Cetyl vinyl ether \$\$ Vinyl cetyl ether \$\$ Hexade

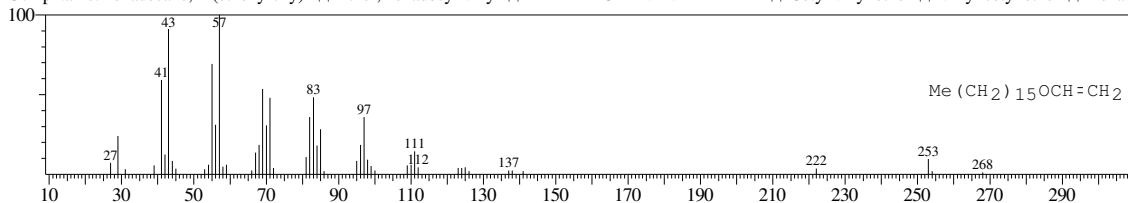

Hit#:3 Entry:328475 Library:WILEY7.LIB

SI:81 Formula:C40 H82 O2 CAS:56554-64-4 MolWeight:595 RetIndex:0

CompName:Hexadecane, 1,1-bis(dodecyloxy)- (CAS) DIDODECYLOXY HEXADECANE \$\$

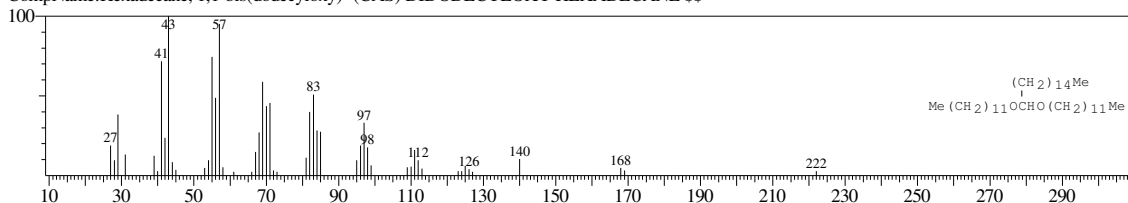

Hit#:4 Entry:180118 Library:WILEY7.LIB

SI:81 Formula:C18 H38 O CAS:51166-34-8 MolWeight:270 RetIndex:0

CompName:Hexadecane, 1-methoxy-13-methyl- (CAS) 13-METHYL,1-HEXADECANOL METHYL ETHER \$\$ 13-METHYL-CETYL ALCOHOL ME

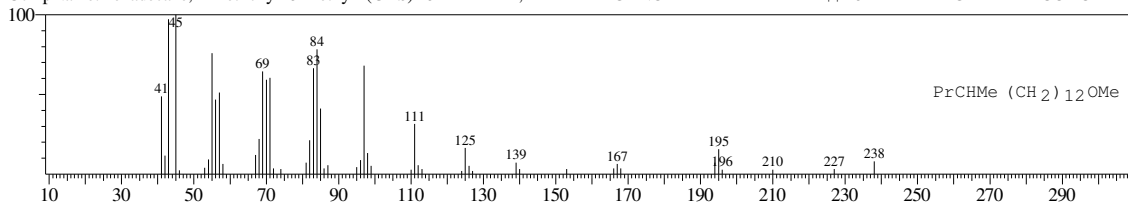

Hit#:5 Entry:235782 Library:WILEY7.LIB

SI:81 Formula:C22 H46 O CAS:661-19-8 MolWeight:326 RetIndex:0

CompName:1-Docosanol (CAS) Behenic alcohol \$\$ Behenyl alcohol \$\$ Docosyl alcohol \$\$ Docosanol-(1) \$\$

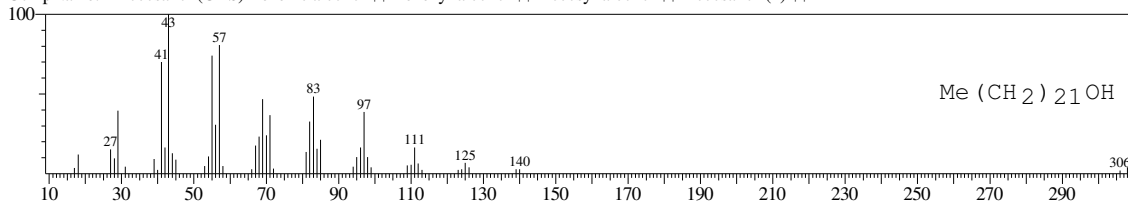

<< Target >>

Line#:32 R.Time:36.880(Scan#:3589) MassPeaks:25

RawMode:Averaged 36.870-36.890(3588-3590) BasePeak:55.05(2314)

BG Mode:Calc. from Peak Group 1 - Event 1

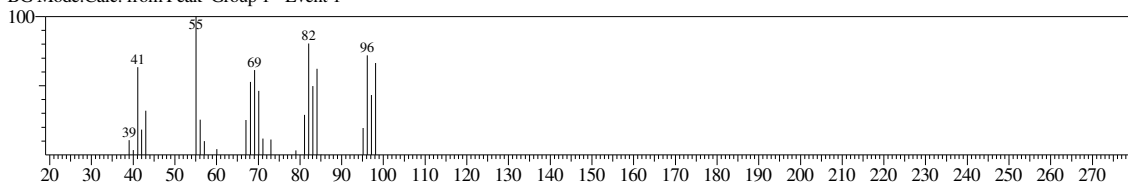

Hit#:1 Entry:133266 Library:WILEY7.LIB

SI:85 Formula:C14 H30 O2 CAS:19812-64-7 MolWeight:230 RetIndex:0

CompName:1,14-Tetradecanediol (CAS) tetra Decamethylene glycol \$\$

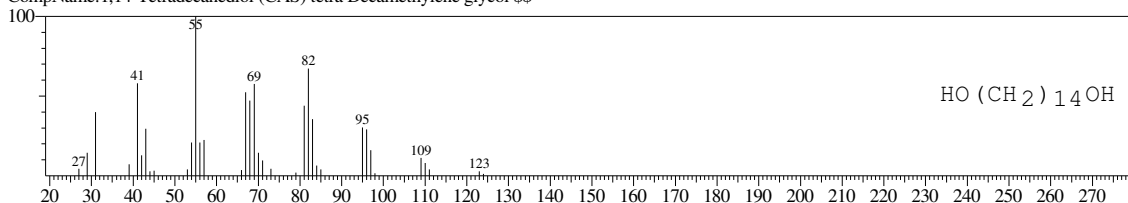

Hit#:2 Entry:98143 Library:WILEY7.LIB

SI:83 Formula:C12 H26 O2 CAS:5675-51-4 MolWeight:202 RetIndex:0

CompName:1,12-Dodecanediol (CAS)

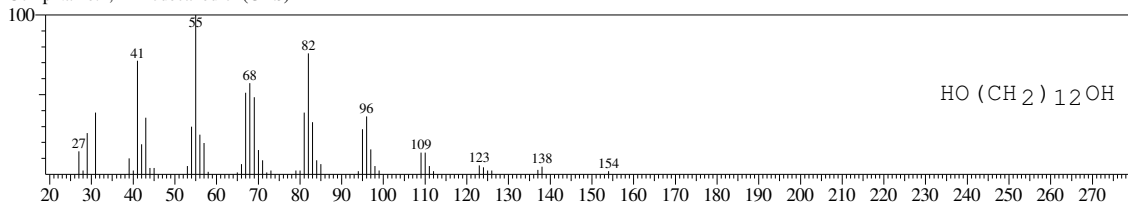

Hit#:3 Entry:166268 Library:WILEY7.LIB

SI:83 Formula:C16 H34 O2 CAS:7735-42-4 MolWeight:258 RetIndex:0

CompName:1,16-HEXADECANEDIOL \$\$

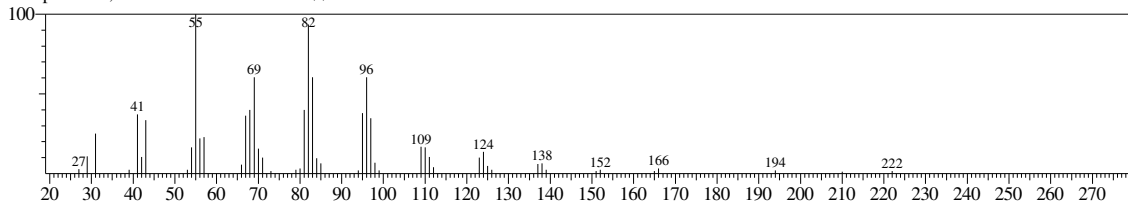

Hit#:4 Entry:81271 Library:WILEY7.LIB

SI:83 Formula:C11 H24 O2 CAS:765-04-8 MolWeight:188 RetIndex:0

CompName:N-UNDECANE-1,11-DIOL \$\$ 1,11-Undecanediol (CAS)

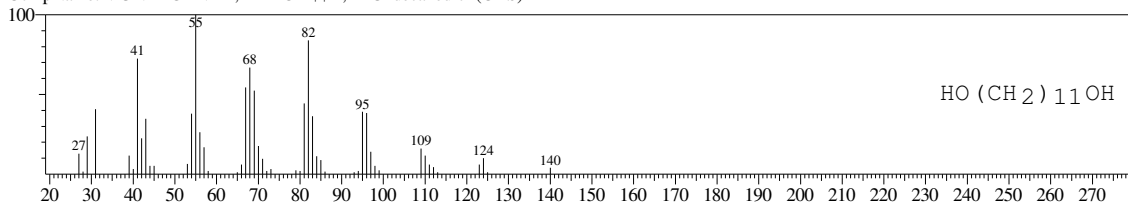

Hit#:5 Entry:188801 Library:WILEY7.LIB

SI:82 Formula:C20 H38 CAS:14811-95-1 MolWeight:278 RetIndex:0

CompName:1,19-EICOSADIENE \$\$

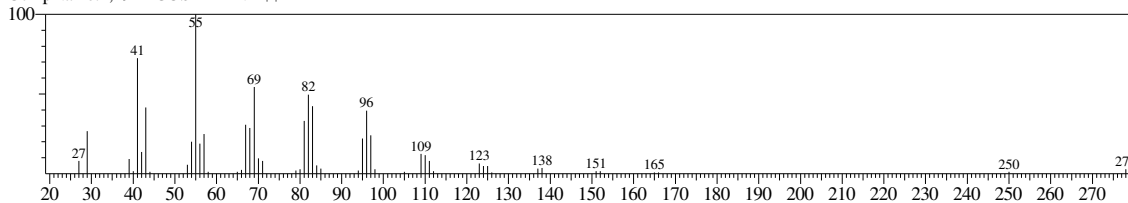

<< Target >>

Line#:33 R.Time:37.220(Scan#:3623) MassPeaks:18

RawMode:Averaged 37.210-37.230(3622-3624) BasePeak:70.10(493)

BG Mode:Calc. from Peak Group 1 - Event 1

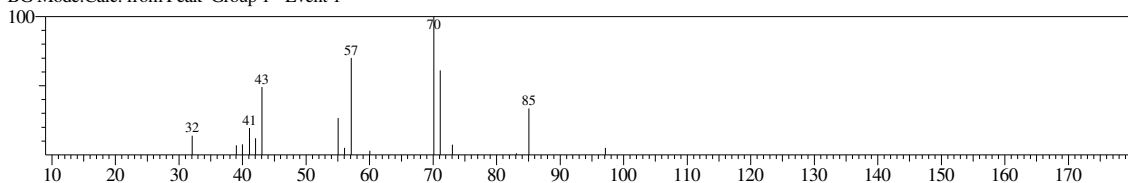

Hit#1 Entry:63319 Library:WILEY7.LIB

SI:87 Formula:C10 H20 O2 CAS:659-70-1 MolWeight:172 RetIndex:0

CompName:Butanoic acid, 3-methyl-, 3-methylbutyl ester (CAS) Apple oil \$\$ 3-METHYLBUTYL ESTER OF 3-METHYL-BUTANOIC ACID \$\$ Solust

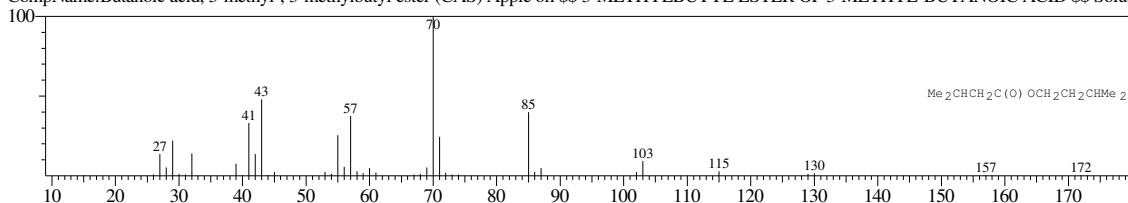

Hit#2 Entry:63296 Library:WILEY7.LIB

SI:86 Formula:C10 H20 O2 CAS:2050-09-1 MolWeight:172 RetIndex:0

CompName:3-Methylbutyl pentanoate \$\$ PENTANSAEURE, 3-METHYLBUTYLESTER \$\$ Pentanoic acid, 3-methylbutyl ester (CAS) Valeric acid, isop

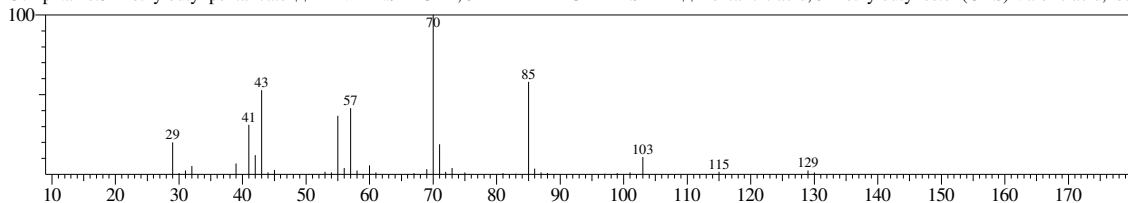

Hit#3 Entry:63318 Library:WILEY7.LIB

SI:85 Formula:C10 H20 O2 CAS:659-70-1 MolWeight:172 RetIndex:0

CompName:Butanoic acid, 3-methyl-, 3-methylbutyl ester (CAS) Apple oil \$\$ 3-METHYLBUTYL ESTER OF 3-METHYL-BUTANOIC ACID \$\$ Solust

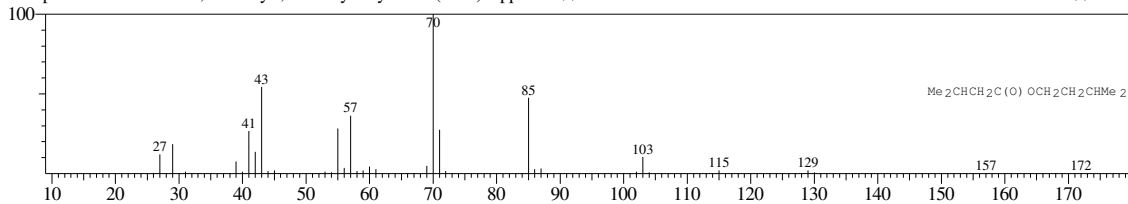

Hit#4 Entry:62664 Library:WILEY7.LIB

SI:85 Formula:C10 H20 O2 CAS:0-00-0 MolWeight:172 RetIndex:0

CompName:ISOAMYLISOVALERATE \$\$

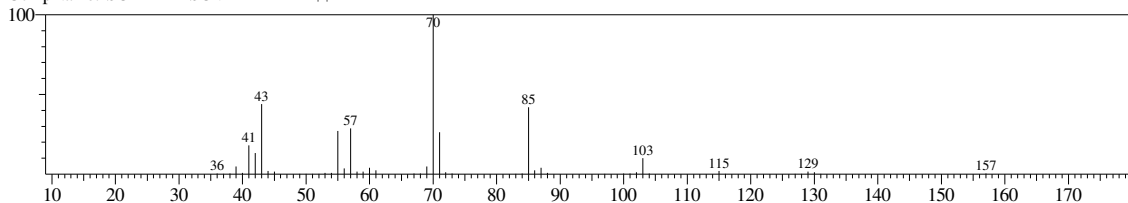

Hit#5 Entry:62647 Library:WILEY7.LIB

SI:85 Formula:C10 H20 O2 CAS:0-00-0 MolWeight:172 RetIndex:0

CompName:3-METHYLBUTYL DECANOATE \$\$

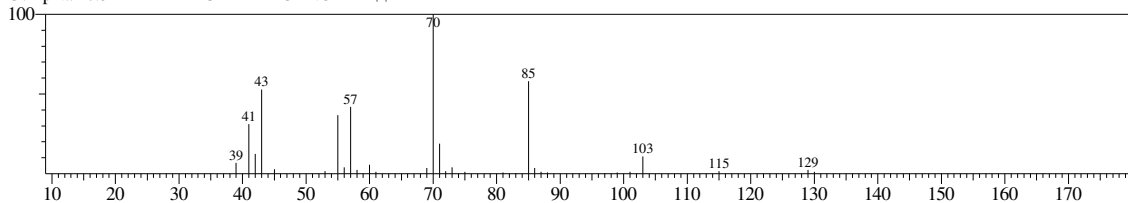

<< Target >>

Line#:34 R.Time:37.580(Scan#:3659) MassPeaks:20

RawMode:Averaged 37.570-37.590(3658-3660) BasePeak:70.10(1294)

BG Mode:Calc. from Peak Group 1 - Event 1

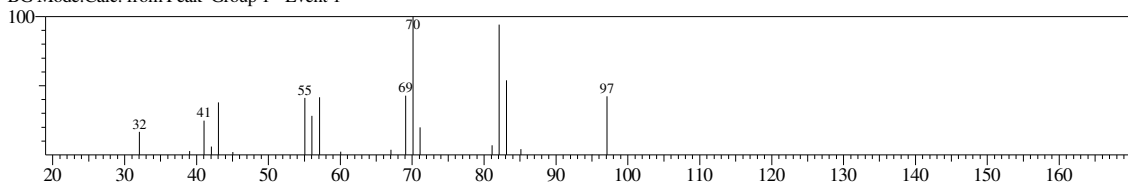

Hit#:1 Entry:58304 Library:WILEY7.LIB

SI:83 Formula:C12 H24 CAS:74630-67-4 MolWeight:168 RetIndex:0

CompName:5-Undecene, 3-methyl-, (E)- (CAS)

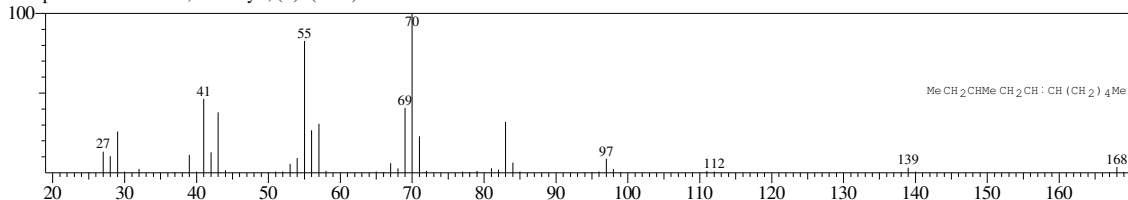

Hit#:2 Entry:58300 Library:WILEY7.LIB

SI:83 Formula:C12 H24 CAS:74630-56-1 MolWeight:168 RetIndex:0

CompName:4-Undecene, 9-methyl-, (Z)- (CAS)

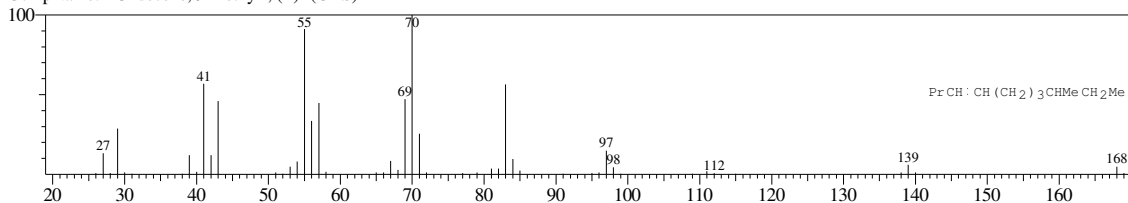

Hit#:3 Entry:58279 Library:WILEY7.LIB

SI:82 Formula:C12 H24 CAS:74630-46-9 MolWeight:168 RetIndex:0

CompName:2-Undecene, 9-methyl-, (E)- (CAS)

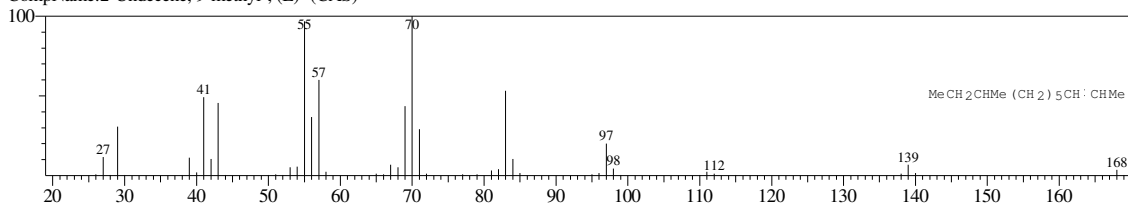

Hit#:4 Entry:58278 Library:WILEY7.LIB

SI:82 Formula:C12 H24 CAS:74630-45-8 MolWeight:168 RetIndex:0

CompName:2-Undecene, 9-methyl-, (Z)- (CAS)

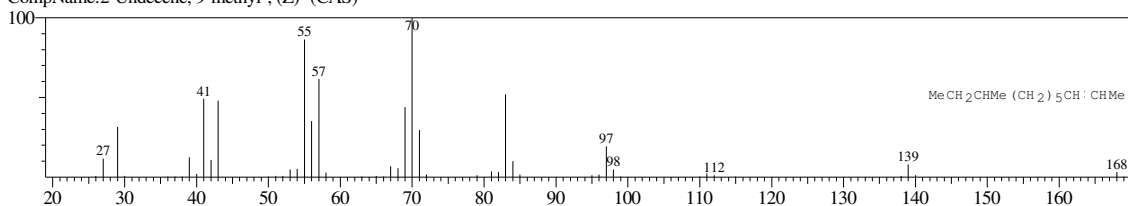

Hit#:5 Entry:58303 Library:WILEY7.LIB

SI:81 Formula:C12 H24 CAS:74630-64-1 MolWeight:168 RetIndex:0

CompName:5-Undecene, 3-methyl-, (Z)- (CAS)

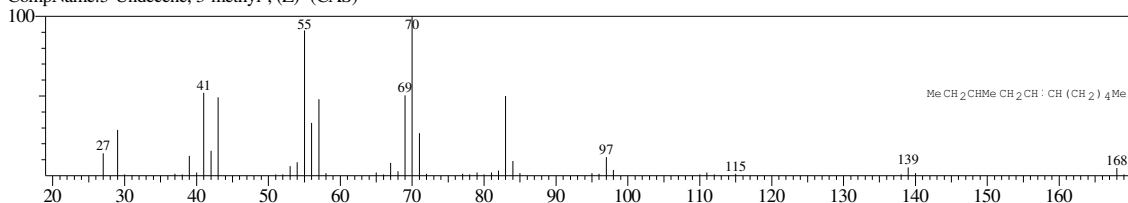

<< Target >>

Line#:35 R.Time:38.010(Scan#:3702) MassPeaks:35

RawMode:Averaged 38.000-38.020(3701-3703) BasePeak:100.10(91021)

BG Mode:Calc. from Peak Group 1 - Event 1

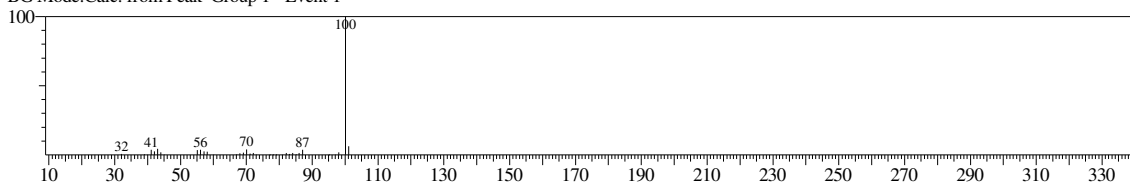

Hit#:1 Entry:245978 Library:WILEY7.LIB

SI:95 Formula:C22 H45 N O CAS:16528-77-1 MolWeight:339 RetIndex:0

CompName:MORPHOLINE, 4-OCTADECYL- \$\$



Hit#:2 Entry:21283 Library:WILEY7.LIB

SI:92 Formula:C6 H14 N2 O CAS:2038-03-1 MolWeight:130 RetIndex:0

CompName:4-Morpholineethanamine \$\$ Morpholine, 4-(2-aminoethyl)- \$.beta.-Morpholinoethylamine \$\$ Morpholinoethylamine \$\$ N-(.beta.-Aminoeth



Hit#:3 Entry:233068 Library:WILEY7.LIB

SI:89 Formula:C13 H16 N4 O6 CAS:139-91-3 MolWeight:324 RetIndex:0

CompName:Furaltadone \$\$ 2-Oxazolidinone, 5-(4-morpholinylmethyl)-3-[[[(5-nitro-2-furanyl)methylene]amino]- \$\$ component of Altapen \$\$ Altabactina



Hit#:4 Entry:22389 Library:WILEY7.LIB

SI:88 Formula:C6 H13 N O2 CAS:622-40-2 MolWeight:131 RetIndex:0

CompName:4-Morpholineethanol (CAS) 2-Morpholinoethanol \$.beta.-Morpholinoethanol \$\$ 2-(4-Morpholinyl)ethanol \$\$ 4-(2-Hydroxyethyl)morpholine

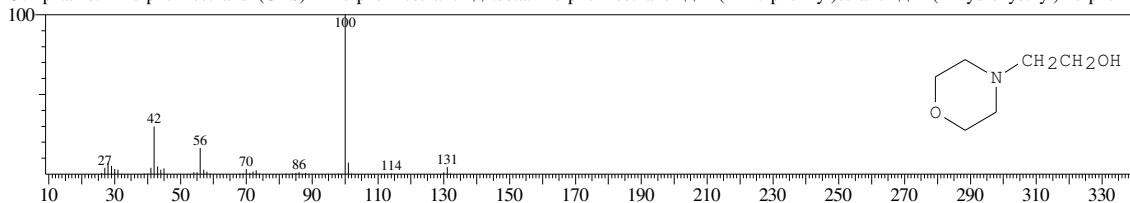

Hit#:5 Entry:106942 Library:WILEY7.LIB

SI:87 Formula:C14 H27 N CAS:62238-25-9 MolWeight:209 RetIndex:0

CompName:4,9-Decadien-2-amine, N-butyl- (CAS) BUTYLAMIN, N-(4,9-DECADIEN-2-YL)- \$\$

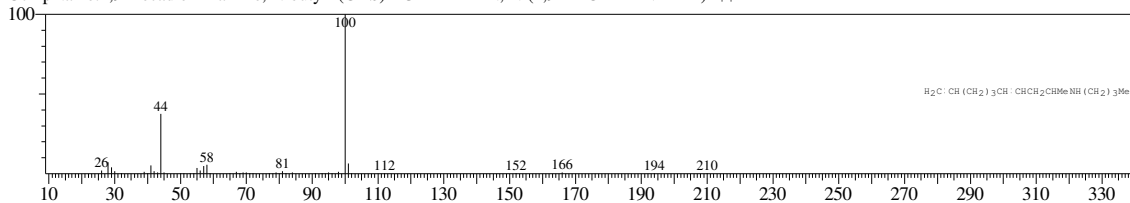

<< Target >>

Line#:36 R.Time:38.420(Scan#:3743) MassPeaks:22

RawMode:Averaged 38.410-38.430(3742-3744) BasePeak:74.05(1556)

BG Mode:Calc. from Peak Group 1 - Event 1

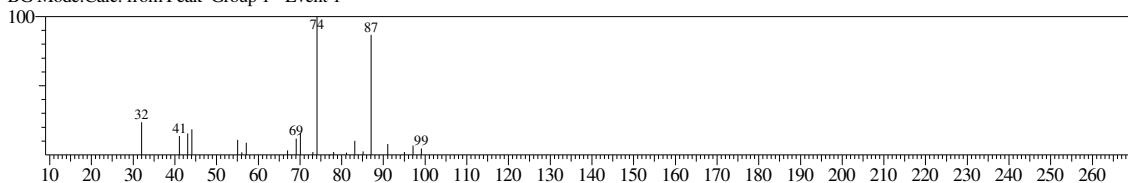

Hit#:1 Entry:78445 Library:WILEY7.LIB

SI:80 Formula:C11 H22 O2 CAS:5129-63-5 MolWeight:186 RetIndex:0

CompName:Nonanoic acid, 7-methyl-, methyl ester (CAS) METHYL 7-METHYLNONANOATE \$\$

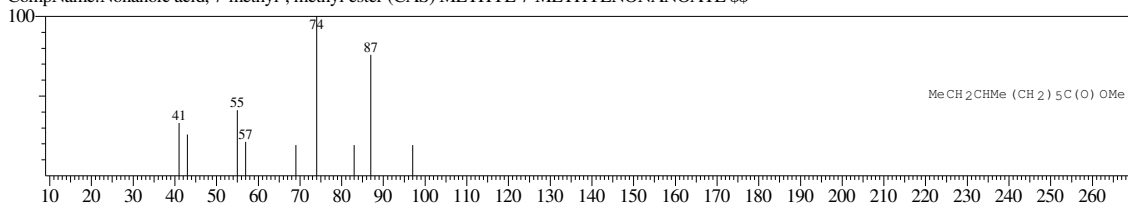

Hit#:2 Entry:63241 Library:WILEY7.LIB

SI:76 Formula:C10 H20 O2 CAS:1731-84-6 MolWeight:172 RetIndex:0

CompName:Nonanoic acid, methyl ester (CAS) Methyl nonanoate \$\$ Methyl n-nonanoate \$\$ Nonanoic acid methyl ester \$\$ Methyl nonylate \$\$ Methyl pel

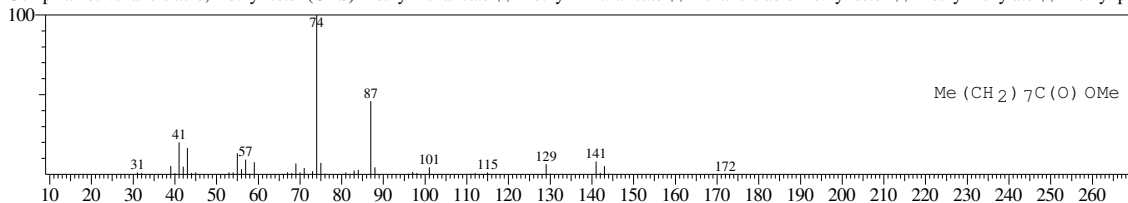

Hit#:3 Entry:180432 Library:WILEY7.LIB

SI:76 Formula:C17 H34 O2 CAS:112-39-0 MolWeight:270 RetIndex:0

CompName:Hexadecanoic acid, methyl ester (CAS) Methyl palmitate \$\$ Methyl hexadecanoate \$\$ Methyl n-hexadecanoate \$\$ Uniphath A60 \$\$ Metholene

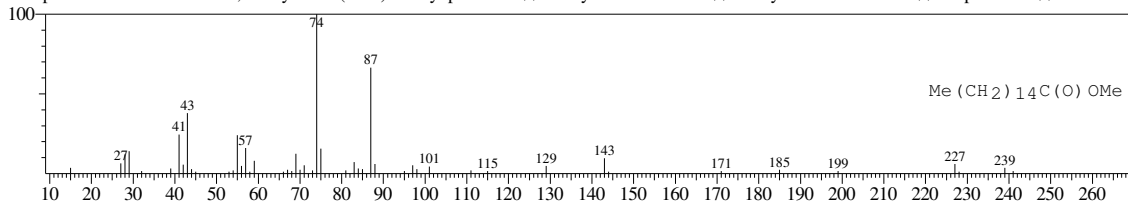

Hit#:4 Entry:79112 Library:WILEY7.LIB

SI:75 Formula:C11 H22 O2 CAS:110-42-9 MolWeight:186 RetIndex:0

CompName:Decanoic acid, methyl ester (CAS) Methyl caprate \$\$ Methyl decanoate \$\$ Capric acid methyl ester \$\$ Uniphath A30 \$\$ Metholene 2095 \$\$ Me

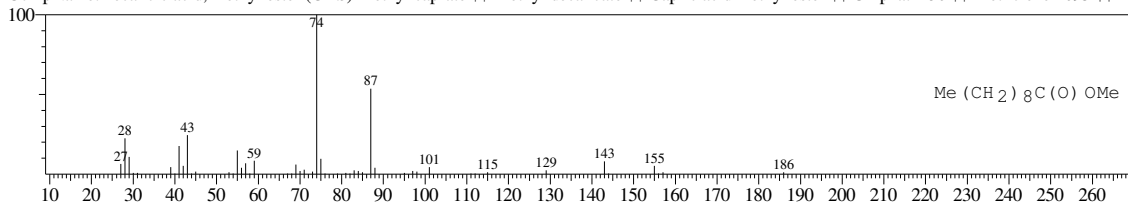

Hit#:5 Entry:95911 Library:WILEY7.LIB

SI:75 Formula:C12 H24 O2 CAS:1731-86-8 MolWeight:200 RetIndex:0

CompName:Undecanoic acid, methyl ester (CAS) Methyl undecanoate \$\$ Methyl ester of undecanoic acid \$\$ METHYL HENDECANOATE \$\$ Methyl un

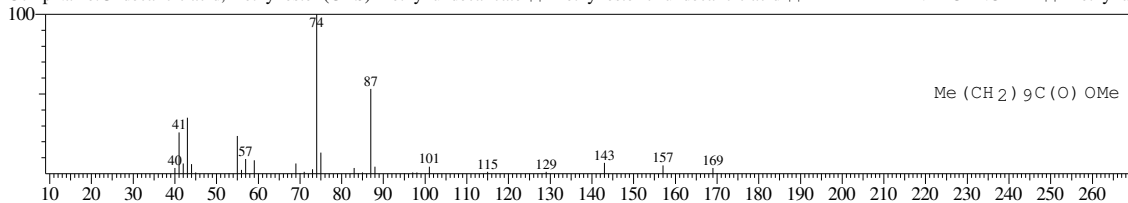

<< Target >>

Line#:37 R.Time:39.630(Scan#:3864) MassPeaks:21

RawMode:Averaged 39.620-39.640(3863-3865) BasePeak:105.05(1286)

BG Mode:Calc. from Peak Group 1 - Event 1

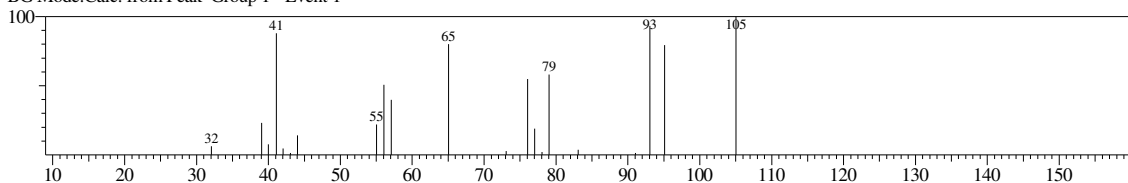

Hit#1 Entry:38298 Library:WILEY7.LIB

SI:69 Formula:C6 H15 Cl SI CAS:18162-48-6 MolWeight:150 RetIndex:0

CompName:Silane, chloro(1,1-dimethylethyl)dimethyl- \$\$ Silane, chloro-tert-butyl dimethyl- \$\$ CHLORO-TER.BUTYLDIMETHYL-SILANE \$\$ tert-Bu

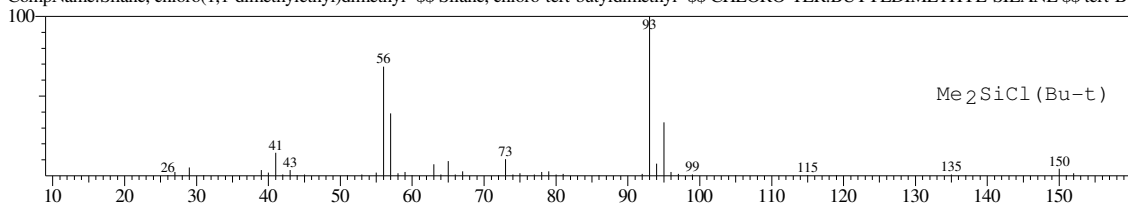

Hit#2 Entry:15167 Library:WILEY7.LIB

SI:66 Formula:C5 H9 F O2 CAS:53813-78-8 MolWeight:120 RetIndex:0

CompName:sec-Butyl fluoroformate \$\$

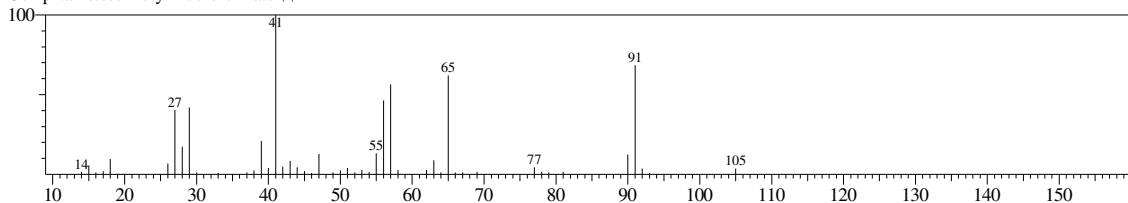

Hit#3 Entry:9155 Library:WILEY7.LIB

SI:65 Formula:C7 H8 O CAS:1121-65-9 MolWeight:108 RetIndex:0

CompName:3,5-Cycloheptadien-1-one (CAS) 2,7-DIHYDROCYCLOHEPTADIENE-1-ONE \$\$ 3,5-Cycloheptadienone \$\$

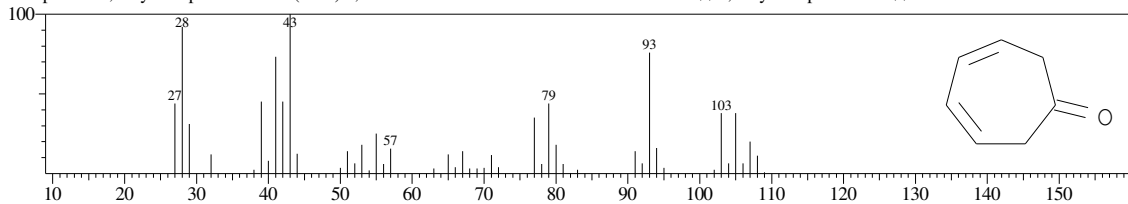

Hit#4 Entry:38299 Library:WILEY7.LIB

SI:64 Formula:C6 H15 Cl SI CAS:18162-48-6 MolWeight:150 RetIndex:0

CompName:Silane, chloro(1,1-dimethylethyl)dimethyl- \$\$ Silane, chloro-tert-butyl dimethyl- \$\$ CHLORO-TER.BUTYLDIMETHYL-SILANE \$\$ tert-Bu

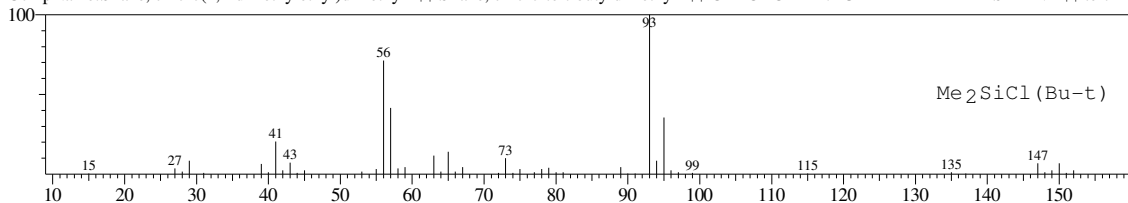

Hit#5 Entry:24178 Library:WILEY7.LIB

SI:64 Formula:C7 H15 Cl CAS:629-06-1 MolWeight:134 RetIndex:0

CompName:Heptane, 1-chloro- (CAS) 1-Chloroheptane \$\$ n-Heptyl chloride \$\$ Heptyl chloride \$\$

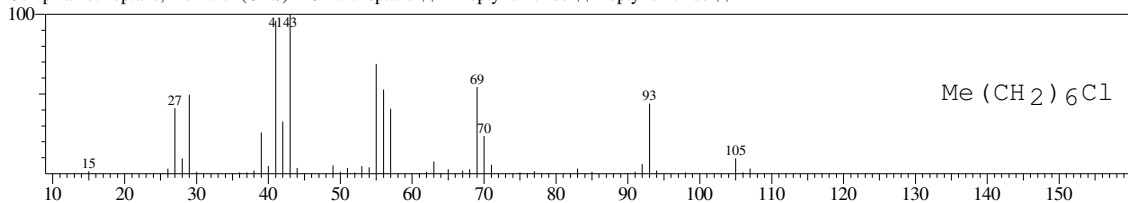

<< Target >>

Line#:38 R.Time:41.070(Scan#:4008) MassPeaks:34

RawMode:Averaged 41.060-41.080(4007-4009) BasePeak:43.05(3654)

BG Mode:Calc. from Peak Group 1 - Event 1

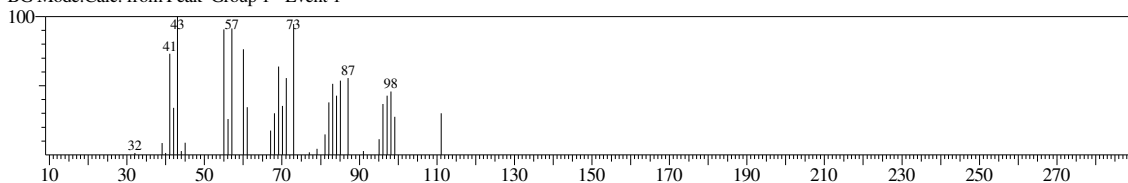

Hit#1 Entry:193348 Library:WILEY7.LIB

SI:85 Formula:C18 H34 O2 CAS:112-80-1 MolWeight:282 RetIndex:0

CompName:9-Octadecenoic acid (Z)- (CAS) Oleic acid \$\$ Red oil \$\$ Oelsaure \$\$ Oleine 7503 \$\$ Pamolyn 100 \$\$ Emersol 211 \$\$ Vopcolene 27 \$\$ cis-C

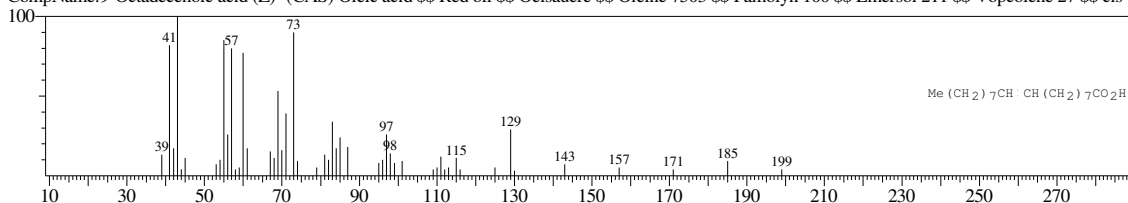

Hit#2 Entry:209955 Library:WILEY7.LIB

SI:84 Formula:C20 H42 O CAS:2456-28-2 MolWeight:298 RetIndex:0

CompName:Decane, 1,1'-oxybis- (CAS) Decyl ether \$\$ Capric ether \$\$ Didecyl ether \$\$ di-n-Decyl ether \$\$

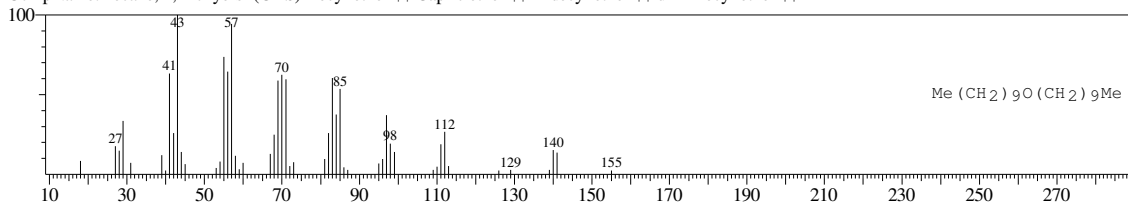

Hit#3 Entry:195570 Library:WILEY7.LIB

SI:83 Formula:C18 H36 O2 CAS:57-11-4 MolWeight:284 RetIndex:0

CompName:Octadecanoic acid (CAS) Stearic acid \$\$ n-Octadecanoic acid \$\$ PD 185 \$\$ NAA 173 \$\$ Vanicol \$\$ Kam 3000 \$\$ Kam 1000 \$\$ Kam 2000 \$\$

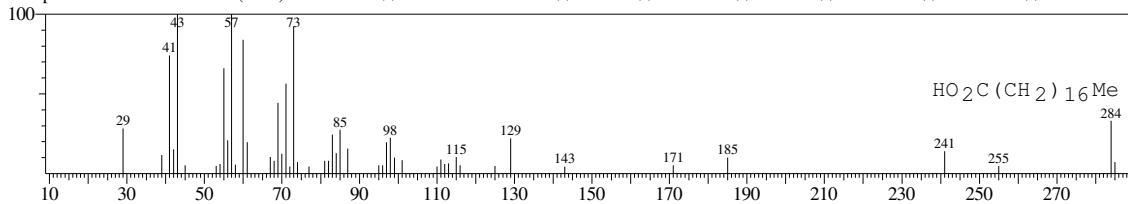

Hit#4 Entry:197676 Library:WILEY7.LIB

SI:83 Formula:C18 H38 S CAS:2885-00-9 MolWeight:286 RetIndex:0

CompName:1-Octadecanethiol (CAS) Octadecanethiol \$\$ Stearyl mercaptan \$\$ Octadecyl mercaptan \$\$ 1-Mercaptooctadecane \$\$ n-Octadecyl mercaptan \$

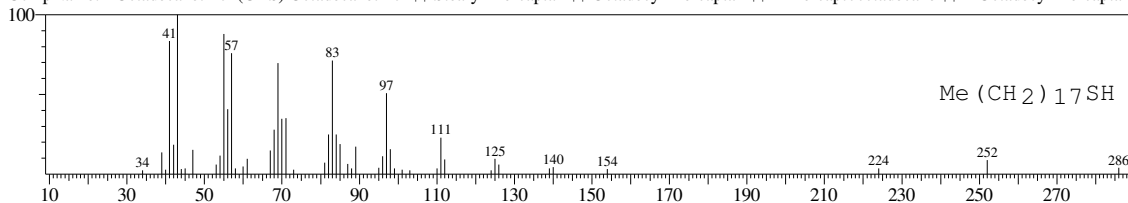

Hit#5 Entry:239088 Library:WILEY7.LIB

SI:83 Formula:C19 H38 O4 CAS:542-44-9 MolWeight:330 RetIndex:0

CompName:Hexadecanoic acid, 2,3-dihydroxypropyl ester (CAS) 1-Monopalmitin \$\$ GLYCEROL-1-HEXADECANOATE \$\$ Palmitin, 1-mono- \$\$ Glyc

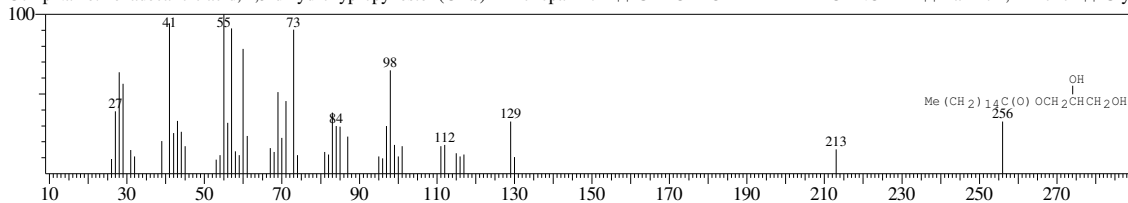



<< Target >>

Line#:39 R.Time:43.300(Scan#:4231) MassPeaks:21

RawMode:Averaged 43.290-43.310(4230-4232) BasePeak:57.10(1702)

BG Mode:Calc. from Peak Group 1 - Event 1

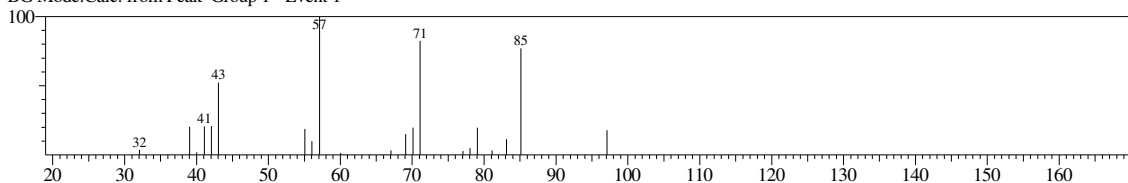

Hit#:1 Entry:76456 Library:WILEY7.LIB

SI:84 Formula:C13 H28 CAS:31081-18-2 MolWeight:184 RetIndex:0

CompName:Nonane, 3-methyl-5-propyl- (CAS)

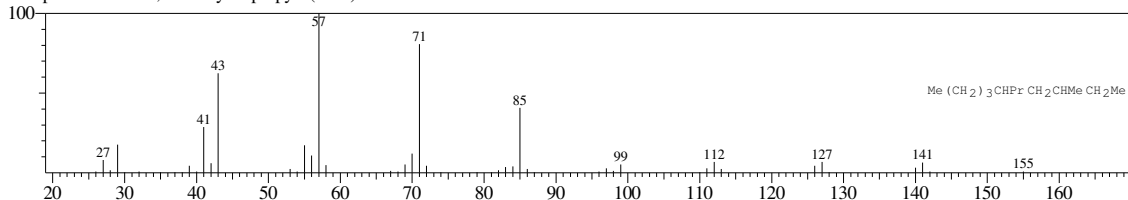

Hit#:2 Entry:46273 Library:WILEY7.LIB

SI:84 Formula:C11 H24 CAS:17302-32-8 MolWeight:156 RetIndex:0

CompName:Nonane, 3,7-dimethyl- (CAS) 3,7-Dimethylnonane \$\$

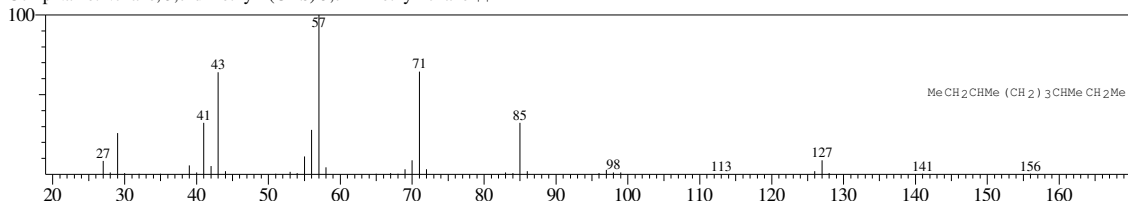

Hit#:3 Entry:60761 Library:WILEY7.LIB

SI:83 Formula:C12 H26 CAS:17312-54-8 MolWeight:170 RetIndex:0

CompName:DECANE, 3,7-DIMETHYL- \$\$

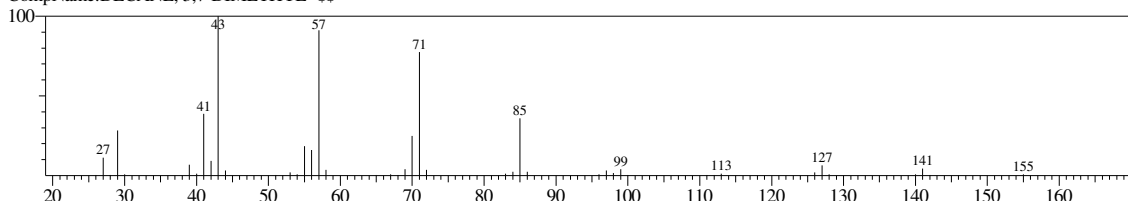

Hit#:4 Entry:85489 Library:WILEY7.LIB

SI:83 Formula:C8 H17 BR CAS:557-35-7 MolWeight:192 RetIndex:0

CompName:Octane, 2-bromo- (CAS) 2-Bromooctane \$\$ 2-Bromooctane \$\$ 2-Octyl bromide \$\$ sec-Octyl bromide \$\$ 1-Methylheptyl bromide \$\$

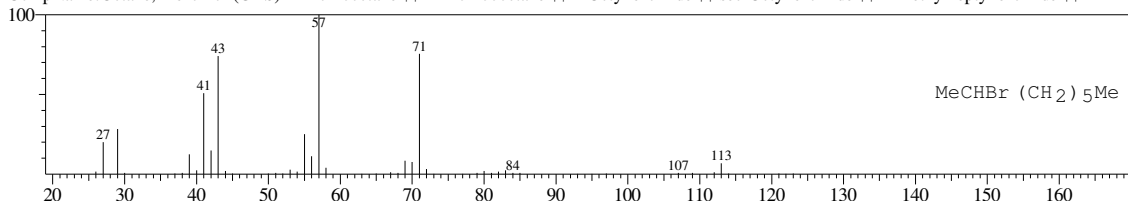

Hit#:5 Entry:31833 Library:WILEY7.LIB

SI:83 Formula:C10 H22 CAS:7154-80-5 MolWeight:142 RetIndex:0

CompName:Heptane, 3,3,5-trimethyl- (CAS) 3,3,5-Trimethylheptane \$\$

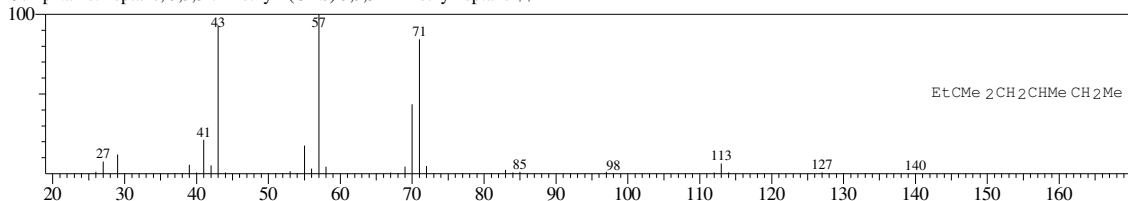

<< Target >>

Line#:40 R.Time:44.340(Scan#:4335) MassPeaks:22

RawMode:Averaged 44.330-44.350(4334-4336) BasePeak:95.10(1215)

BG Mode:Calc. from Peak Group 1 - Event 1

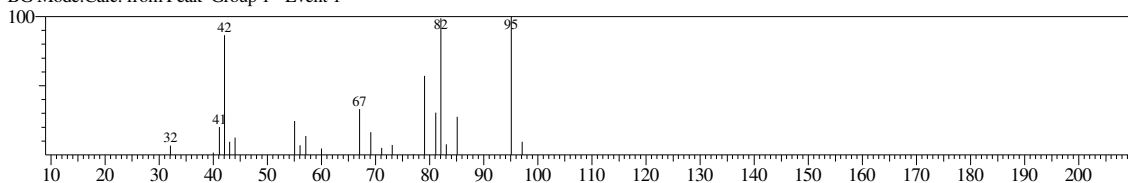

Hit#1 Entry:192969 Library:WILEY7.LIB

SI:74 Formula:C18 H34 O2 CAS:0-00-0 MolWeight:282 RetIndex:0

CompName:LAURINSAEURE, HEX-3-ENYLESTER \$\$

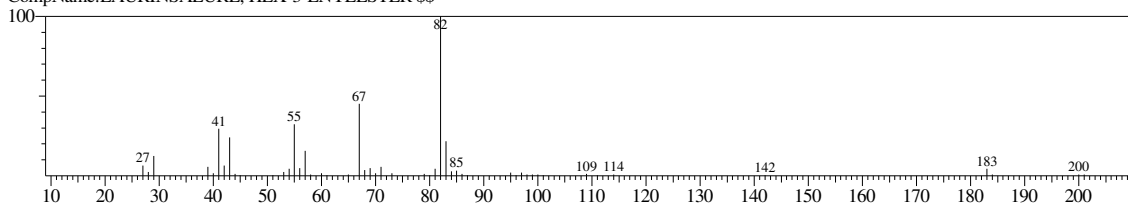

Hit#2 Entry:192970 Library:WILEY7.LIB

SI:74 Formula:C18 H34 O2 CAS:0-00-0 MolWeight:282 RetIndex:0

CompName:LAURINSAEURE, 2-HEXEN-1-YLESTER \$\$

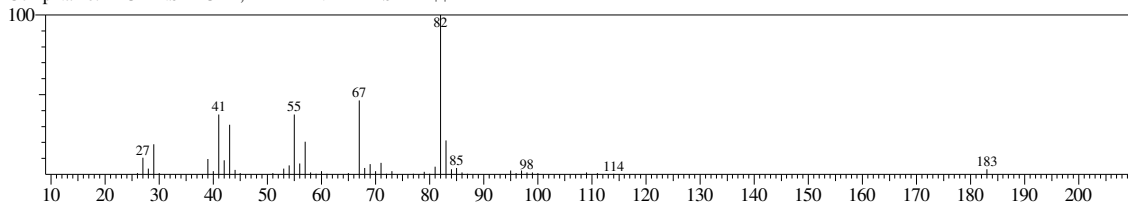

Hit#3 Entry:20593 Library:WILEY7.LIB

SI:73 Formula:C8 H16 O CAS:4442-79-9 MolWeight:128 RetIndex:0

CompName:Cyclohexaneethanol (CAS) 2-Cyclohexylethanol \$\$ 2-CYCLOHEXYL-ETHANOL \$\$ Cyclohexylethyl alcohol \$\$ .beta.-Cyclohexylethyl alc

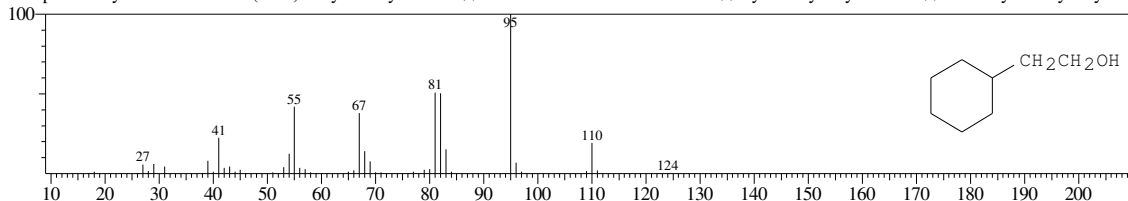

Hit#4 Entry:27588 Library:WILEY7.LIB

SI:71 Formula:C10 H18 CAS:13837-71-3 MolWeight:138 RetIndex:0

CompName:m-Menth-1(7)-ene, (R)-(-)- (CAS) (-)-M-MENTH-1(7)-ENE \$\$ Cyclohexane, 1-methylene-3-(1-methylethyl)-, (R)- (CAS)

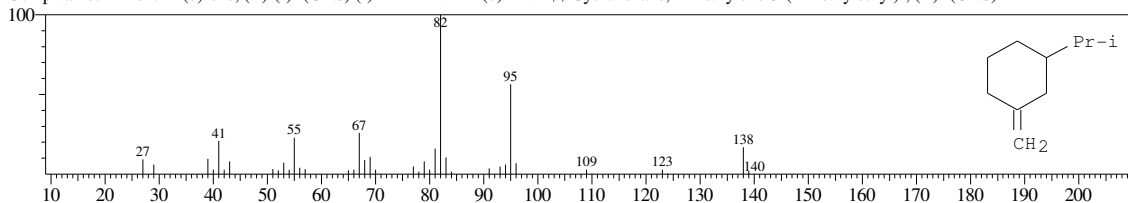

Hit#5 Entry:29797 Library:WILEY7.LIB

SI:71 Formula:C9 H16 O CAS:106-72-9 MolWeight:140 RetIndex:0

CompName:5-Heptenal, 2,6-dimethyl- (CAS) Melonal \$\$ 2,6-Dimethyl-5-heptenal \$\$ 2,6-dimethyl 5-heptenal \$\$ 2,6-Dimethyl-5-hepten-1-al \$\$ 2,6-Dimet

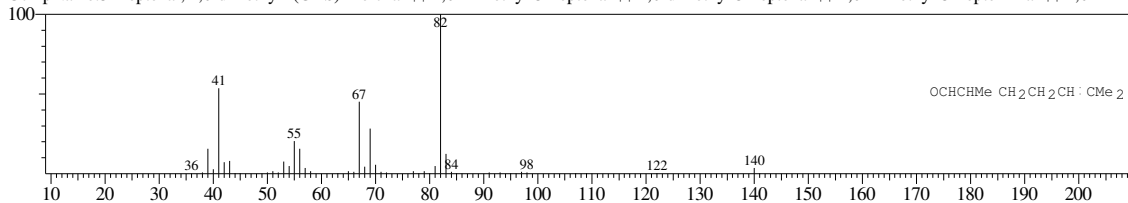

<< Target >>

Line#:41 R.Time:45.050(Scan#:4406) MassPeaks:16

RawMode:Averaged 45.040-45.060(4405-4407) BasePeak:100.05(6834)

BG Mode:Calc. from Peak Group 1 - Event 1

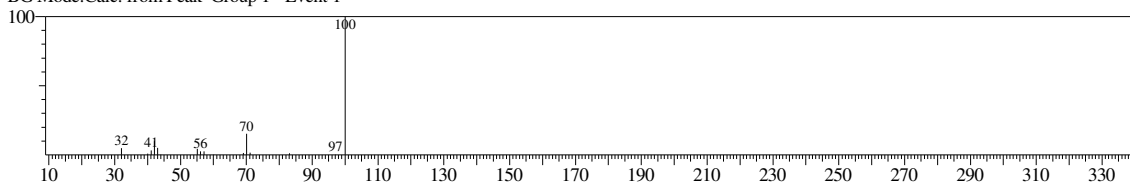

Hit#1 Entry:245978 Library:WILEY7.LIB

SI:87 Formula:C22 H45 N O CAS:16528-77-1 MolWeight:339 RetIndex:0

CompName:MORPHOLINE, 4-OCTADECYL- \$\$



Hit#2 Entry:233068 Library:WILEY7.LIB

SI:86 Formula:C13 H16 N4 O6 CAS:139-91-3 MolWeight:324 RetIndex:0

CompName:Furaltone 2-Oxazolidinone, 5-(4-morpholinylmethyl)-3-[[[(5-nitro-2-furanyl)methylene]amino]- component of Altapen Altabactina

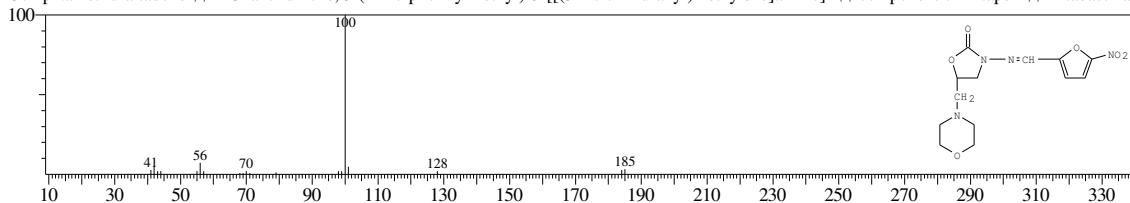

Hit#3 Entry:21283 Library:WILEY7.LIB

SI:85 Formula:C6 H14 N2 O CAS:2038-03-1 MolWeight:130 RetIndex:0

CompName:4-Morpholineethanamine Morpholine, 4-(2-aminoethyl)- \$.beta.-Morpholinoethylamine \$\$.beta.-Morpholinoethylamine \$\$.N-(.beta.-Aminoethyl)-

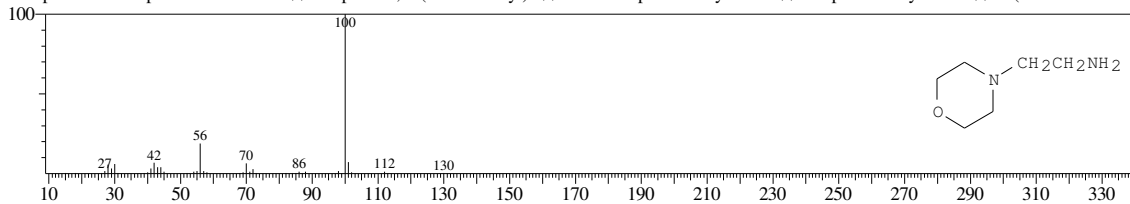

Hit#4 Entry:127589 Library:WILEY7.LIB

SI:84 Formula:C9 H14 N4 O3 CAS:6506-37-2 MolWeight:226 RetIndex:0

CompName:Nimorazole Morpholine, 4-[2-(5-nitro-1H-imidazol-1-yl)ethyl]- \$\$.Aterol \$\$.Aterol forte \$\$.Esclama \$\$.K-1900 \$\$.Morpholine, 4-(2-(5-nitro-1H-imidazol-1-yl)ethyl)-

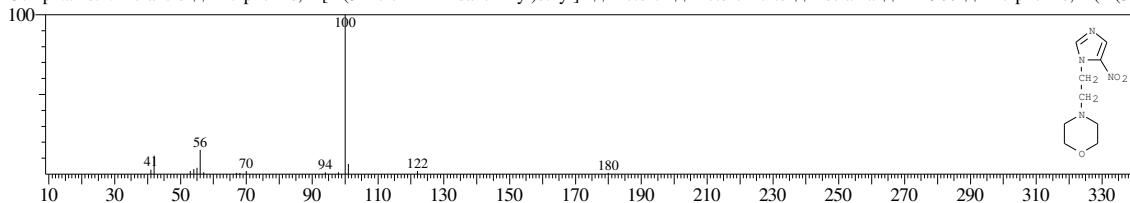

Hit#5 Entry:61608 Library:WILEY7.LIB

SI:84 Formula:C9 H17 N O2 CAS:0-00-0 MolWeight:171 RetIndex:0

CompName:2-morpholinomethyl-tetrahydrofuran \$\$.Tetrahydrofuran, 2-(2-morpholinomethyl)-

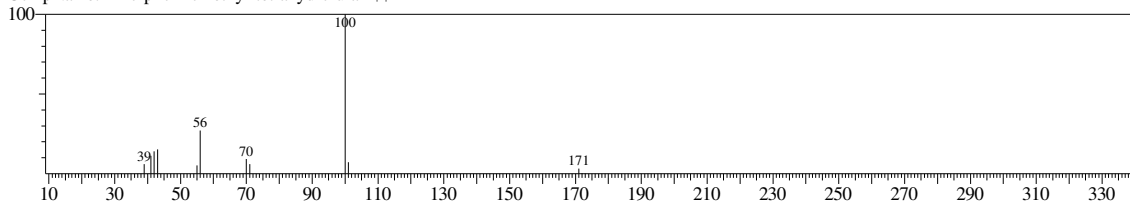

<< Target >>

Line#:42 R.Time:45.400(Scan#:4441) MassPeaks:14

RawMode:Averaged 45.390-45.410(4440-4442) BasePeak:95.10(1028)

BG Mode:Calc. from Peak Group 1 - Event 1

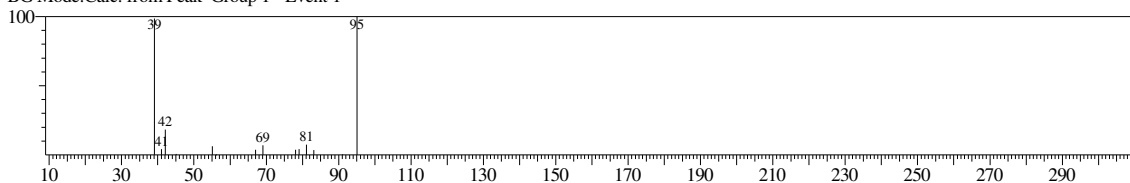

Hit#:1 Entry:17049 Library:WILEY7.LIB

SI:81 Formula:C7 H8 O2 CAS:0-00-0 MolWeight:124 RetIndex:0

CompName:spiropentane-1,3-dicarboxaldehyde \$\$

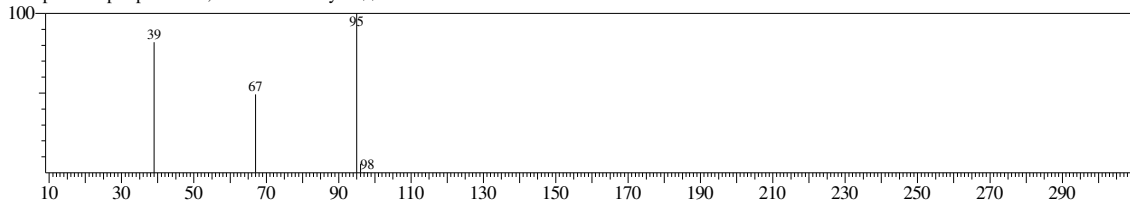

Hit#:2 Entry:18731 Library:WILEY7.LIB

SI:80 Formula:C6 H6 O3 CAS:0-00-0 MolWeight:126 RetIndex:0

CompName:1-(2-Furanyl)-2-hydroxyethanone \$\$ 2-Hydroxyacetyl furan \$\$

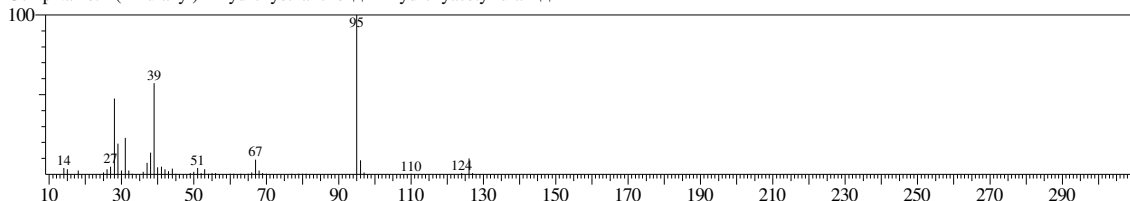

Hit#:3 Entry:208974 Library:WILEY7.LIB

SI:79 Formula:C16 H10 O6 CAS:0-00-0 MolWeight:298 RetIndex:0

CompName:1,4-PHENYLENE BIS(2-FUROATE) \$\$

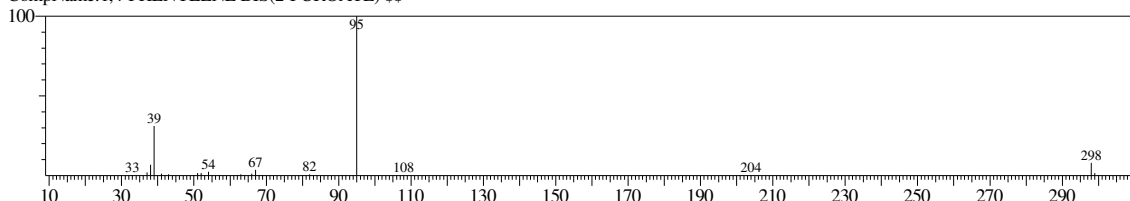

Hit#:4 Entry:183543 Library:WILEY7.LIB

SI:77 Formula:C12 H10 N4 O4 CAS:0-00-0 MolWeight:274 RetIndex:0

CompName:N,N''-ETHANEDIYLLIDENE BIS(2-FUROHYDRAZIDE) \$\$

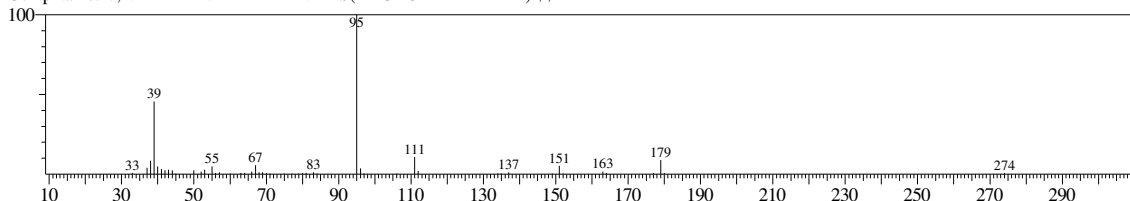

Hit#:5 Entry:21559 Library:WILEY7.LIB

SI:76 Formula:C5 H3 Cl O2 CAS:20357-65-7 MolWeight:130 RetIndex:0

CompName:2H-Pyran-2-one, 6-chloro- (CAS) 6-CHLORO-2-PYRONE \$\$ N,N'-dimethoxy-N,N'-dimethyl-3-(1-pyrrolidinyl)glutaramide \$\$

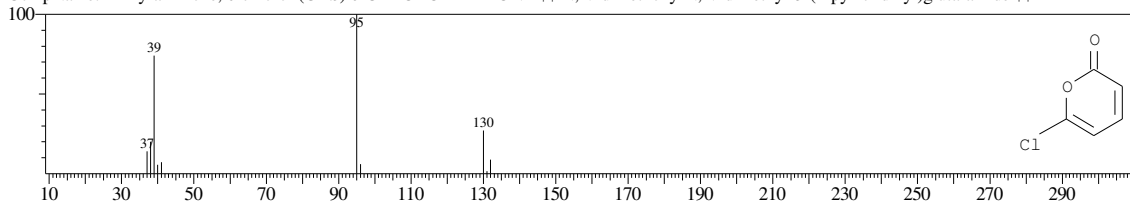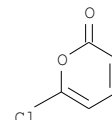

<< Target >>

Line#:43 R.Time:47.820(Scan#:4683) MassPeaks:19

RawMode:Averaged 47.810-47.830(4682-4684) BasePeak:85.10(2047)

BG Mode:Calc. from Peak Group 1 - Event 1

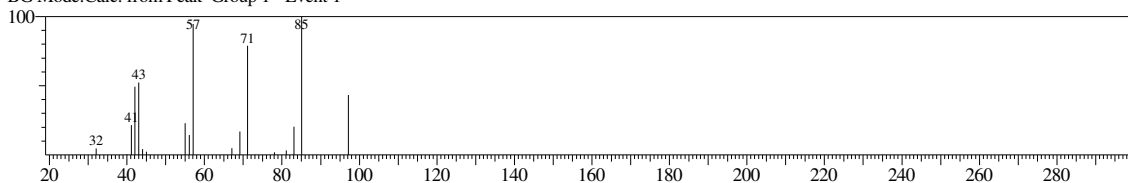

Hit#:1 Entry:207678 Library:WILEY7.LIB

SI:81 Formula:C<sub>21</sub>H<sub>44</sub> CAS:54833-48-6 MolWeight:296 RetIndex:0

CompName:Heptadecane, 2,6,10,15-tetramethyl- (CAS) 2,6,10,15-TETRAMETHYLHEPTADECANE \$\$

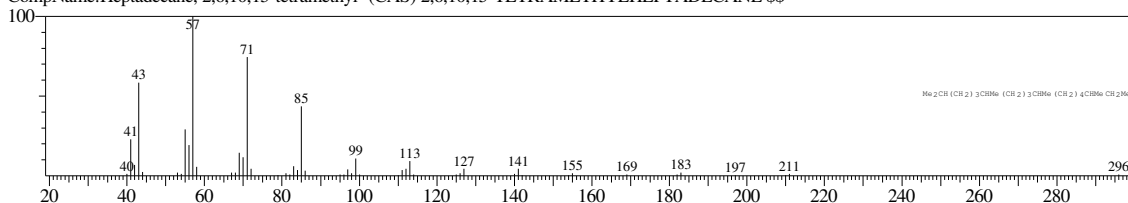

Hit#:2 Entry:119357 Library:WILEY7.LIB

SI:81 Formula:C<sub>10</sub>H<sub>21</sub>BR CAS:30571-71-2 MolWeight:220 RetIndex:0

CompName:Decane, 3-bromo- (CAS)

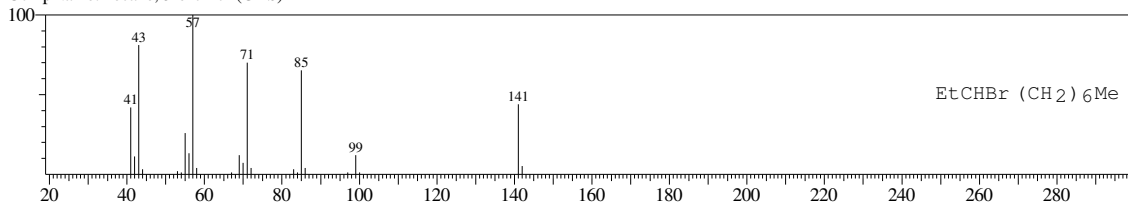

Hit#:3 Entry:128619 Library:WILEY7.LIB

SI:81 Formula:C<sub>14</sub>H<sub>31</sub>BO CAS:0-00-0 MolWeight:226 RetIndex:0

CompName:DIETHYL(DECYLOXY)-BORANE \$\$

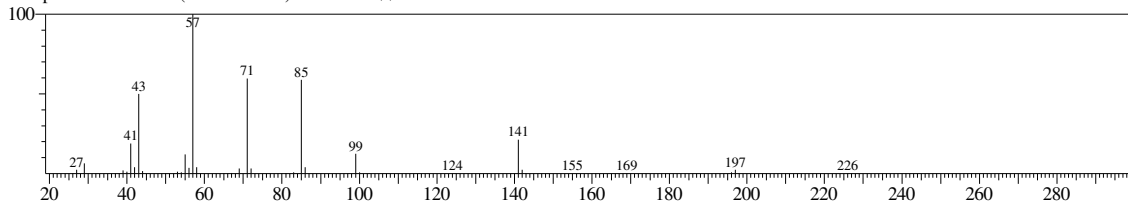

Hit#:4 Entry:46273 Library:WILEY7.LIB

SI:80 Formula:C<sub>11</sub>H<sub>24</sub> CAS:17302-32-8 MolWeight:156 RetIndex:0

CompName:Nonane, 3,7-dimethyl- (CAS) 3,7-Dimethylnonane \$\$

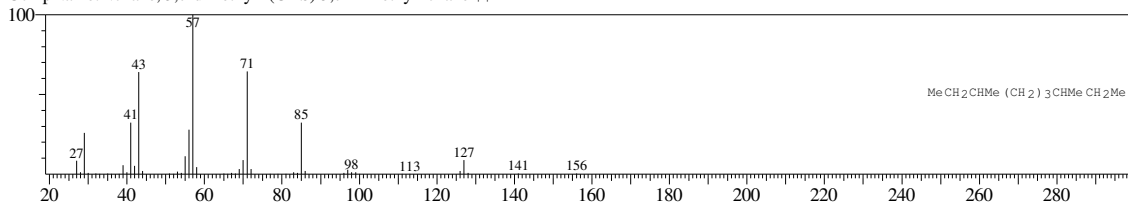

Hit#:5 Entry:111419 Library:WILEY7.LIB

SI:80 Formula:C<sub>15</sub>H<sub>32</sub> CAS:31295-56-4 MolWeight:212 RetIndex:0

CompName:Dodecane, 2,6,11-trimethyl- (CAS)

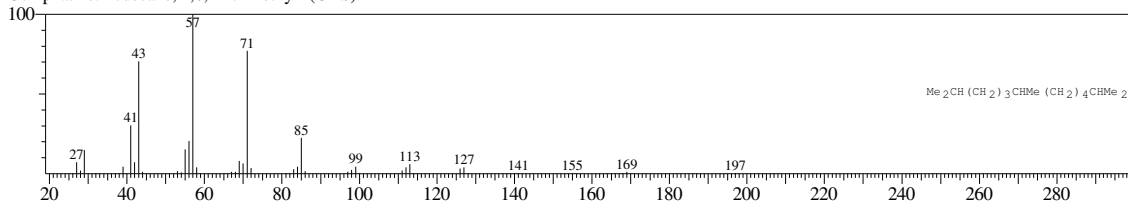

Supplement: f1 [file 3092246.f1.zip]
