# Supplementary material for: Panelist Acceptance, Proximate Characteristics of Amino Acids and Volatile Compounds, and Color Profile of Fermented Cempedak (Artocarpus champeden) and Oyster Mushroom (Pleurotus ostreatus) Seasoning
Source: Hindawi journal article supplement (doi:10.1155/2022/3092246), 2022-07-07
Supplement: f1 [file 3092246.f1.zip]

Archive with 4 entries (4 files):
- 3092246.f1/flavoured mushroom.pdf
- 3092246.f1/mandai.pdf
- 3092246.f1/mushroom.pdf
- 3092246.f1/seasoning mandai-mushroom.pdf
